# Supplementary material for: Footprint-free human fetal foreskin derived iPSCs: A tool for modeling hepatogenesis associated gene regulatory networks
Source: PubMed Central journal article supplement (PMC5524812; doi:10.1038/s41598-017-06546-9), 2017-07-24
Supplement: 41598_2017_6546_MOESM1_ESM.pdf [file 41598_2017_6546_MOESM1_ESM.pdf]

## **Supplementary Data**

### **Footprint-free human fetal foreskin derived iPSCs: a tool for modeling hepatogenesis associated gene regulatory networks.**

**Peggy Matz<sup>1,2,3</sup>, Wasco Wruck<sup>2</sup>, Beatrix Fauler<sup>1</sup>, Diran Herebian<sup>4</sup>, Thorsten Mielke<sup>1</sup> and James Adjaye<sup>1,2\*</sup>**

<sup>1</sup>Max Planck Institute for Molecular Genetics, 14195 Berlin, Germany

<sup>2</sup>Institute for Stem Cell Research and Regenerative Medicine, Heinrich Heine University, 40225 Düsseldorf, Germany

<sup>3</sup>Institute of Biology, Humboldt University of Berlin, 10099 Berlin, Germany

<sup>4</sup>Department of General Pediatrics, Neonatology and Pediatric Cardiology, Heinrich Heine University, 40225 Düsseldorf, Germany

#### **\*Contact information:**

James Adjaye, Prof. Dr., Institute for stem cell research and regenerative medicine, Medical faculty, Heinrich Heine University, Moorenstraße 5, D 40225 Düsseldorf, Germany, Tel: 0049-211-81-08191, Fax: 0049-211-81-19147, Email: James.Adjaye@med.uni-duesseldorf.de

### **Supplementary Figure S1: Global gene analysis.**

(A) Heatmap of cytochrome P450 family members. The transcriptome profile of the following samples were compared: mature liver (PHH), fetal liver, Hepatocyte-like cells derived from E-iPSCs (HLC), hepatic endoderm derived from E-iPSCs (HE), definitive endoderm derived from E-iPSCs (DE), E-iPSCs (iPSC\_B1). (B) 100 k-means cluster are listed. The used k-means cluster for figure 4B are marked with asterisk. One asterisk = iPSC k-means cluster, two asterisk = DE k-means cluster, three asterisk = HE k-means cluster, four asterisk = HLC k-means cluster, five asterisk = fetal liver k-means cluster and six asterisk = PHH k-means cluster. (C) Heatmap of ABC transporter-related genes. The transcriptome profile of the following samples were compared: mature liver (PHH), fetal liver, Hepatocyte-like cells derived from E-iPSCs (HLC), hepatic endoderm derived from E-iPSCs (HE), definitive endoderm derived from E-iPSCs (DE), E-iPSCs (iPSC\_B1). (D) Heatmap of bile acid transporter-related genes. The transcriptome profile of the following samples were compared: E-iPSCs (iPSC\_B1), definitive endoderm derived from E-iPSCs (DE), hepatic endoderm derived from E-iPSCs (HE), Hepatocyte-like cells derived from E-iPSCs (HLC). (E) Heatmap of HIPPO pathway-related genes. The transcriptome profile of the following samples were compared: mature liver (PHH), fetal liver, Hepatocyte-like cells derived from E-iPSCs (HLC), hepatic endoderm derived from E-iPSCs (HE), definitive endoderm derived from E-iPSCs (DE), E-iPSCs (iPSC\_B1). A scheme of the HIPPO signaling pathway is shown.

### **Supplementary Figure S2: Liver specification.**

(A) KEGG pathway analysis of HLC-tissue specific genes resulted in the listed pathways. For that a DAVID analysis was done from the exclusively expressed genes in HLCs from the venn diagram in figure 6A (838 genes from Supp Table 6). (B) Pie chart illustrating tissue distribution of genes exclusively expressed in HLCs. The list of exclusively expressed genes in HLCs (from venn analysis figure 5A) was analysed employing the PaGenBase database. PaGenBase is a database for the collection of tissue- and time-specific pattern genes, including specific genes, selective genes, housekeeping genes and repressed genes (Pan et al. 2013; <http://bioinf.xmu.edu.cn/PaGenBase/>).

### **Supplementary Figure S3: Comparison of gene expression of a-priori-known stage-specific markers in multiple pluripotent stem cell lines differentiated into HLCs leading to the central transcription factor network.**

(A) heatmap of the stage specific markers listed in Supplementary Figure S5A from this study (Figure 6B), (B) unpublished data of differentiating ES into HLCs related to the study by Jozefczuk et al.<sup>1</sup> and (C) published data from the study by Jozefczuk et al.<sup>1</sup> differentiating iPSCs into HLCs.

### **Supplementary Figure S4: Gene regulatory networks.**

This figure presents clusters associated with the gene regulatory networks from Figure 4B (transcription factor over-representation analysis via the oPOSSUM data base, Kwon et al. 2012). (A) The network for iPSCs shows the regulatory relations between OCT4 (POU5F1), SOX2, NANOG, KLF4. (B) The network for DE demonstrates the regulatory relations between SP1, INSM1, MZF1, KLF4 and REST. (C) The network for HE represents the regulatory relations between LHX3, MIZF and CTCF. (D) The network for HLC illustrates the regulatory relations between PLAG1, EWSR1-FLI1 and IRF2. (E) The network for fetal liver shows the regulatory relations between TAL1::GATA1, HNF1A, ZFN143, GATA1 and HNF1B. (F) The network for primary human hepatocytes (PHH) represents the regulatory relations between HNF1A, CTCF, ZFX, HNF4A, FOXA2, FOXA1 and CEBPA.

### **Supplementary Figure S5: Scheme for construction of the hepatocyte differentiation transcription factor network.**

(A) A-priori-known markers refer to the stages iPSC/ESC (red), DE (yellow), HE (blue) and HLC (green) in the gene expression data and at least one additional cell line. Transcription factor analysis via oPOSSUM3 delivers transcription factors regulating this gene set. (B) Z-score from oPOSSUM3-analysis is plotted vs. GC content. Myc, HNF1A, HNF4A, SP1, MZF1 and KLF4 are most significant with the highest Z-scores greater than 10. (C) The most significant transcription factors with a Z-score greater than 10 (green) are connected with the genes they regulate (red) from the list (A).

### **Supplementary Tables**

#### **Supplementary Table S1: KeyGenes corresponding to Figure 4E.**

(A) KeyGenes prediction matrix. KeyGenes Identity score of the queried samples Hepatocyte-like-cells (HLCs), fetal liver and primary human hepatocyte (PHH) to the samples from the training set. (B) KeyGenes classifier genes. Genes determined by the KeyGenes tool as classifiers for the tissue types provided in the training set.

#### **Supplementary Table S2: Gene lists of venn diagram Figure 5A.**

Gene names of all expressed genes in hepatocyte-like cells (HLCs), HLCs and fetal liver, fetal liver, fetal liver and primary hepatocytes (PHH), in PHH, PHH and HLCs as well as genes which were expressed in all samples. Gene list relates to venn diagram in Figure 5A.

#### **Supplementary Table S3: Gene list of exclusively expressed genes in HLCs.**

List of gene names related to figure 5B GO cellular components of HLCs exclusively expressed genes (Fisher extract  $p < 0.01$ ). Data set from venn diagram figure 5A genes which were exclusively expressed in HLCs (1806 genes, Supplementary Table S2) were used for this analysis in DAVID.

**Supplementary Table S4: Gene lists of the venn diagram Figure 5C.**

Gene names of all expressed genes in hepatocyte-like cells (HLCs) vs. fetal liver, fetal liver vs. primary hepatocytes (PHH) and HLCs vs. PHH as well as genes expressed in the intersection and in all samples. Gene list relates to venn diagram in Figure 5C.

**Supplementary Table S5: Gene list related to Hippo pathway.**

List of gene names related to figure 5D GO cellular components of Hippo pathway in the intersection of HLCs vs. fetal liver and HLCs vs. PHH (Fisher extract  $p < 0.01$ ). Data set from venn diagram Figure 5C genes which were expressed in HLCs vs. fetal liver and HLCs vs. PHH (1958 genes, Supplementary Table S4) were used for this analysis in DAVID.

**Supplementary Table S6: Gene lists of the venn diagram Figure 6A.**

Gene names of all expressed genes in definitive endoderm (DE), hepatic endoderm (HE) and hepatocyte-like cells (HLCs) as well as genes which were expressed in the intersections and in all samples. Gene list relates to venn diagram in Figure 6A.

**Supplementary Table S7: List of genes used for heatmaps in Supplementary Figure S3 and regulatory network analysis via oPOSSUM data base.**

List of priori-known markers refer to the stages iPSC/ESC (red), DE (yellow), HE (blue) and HLC (green) in the gene expression data and at least one additional cell line.

**Supplementary Table S8: Regulatory network analysis via oPOSSUM data base.**

List of transcription factors (TFs) with their classification, JASPAR ID, target gene hits, transcription factor binding site (TFBS) hits and Z-score. The oPOSSUM database (Kwon et al. 2012) was used. TFs list relates to Figure 6C.

**Supplementary Table S9: Gene lists of a venn diagram.**

Gene names of all expressed genes in hepatocyte-like cells (HLCs) vs. induced pluripotent stem cells (iPSCs), fetal liver vs. iPSCs and PHH vs. iPSCs as well as genes which were expressed in the intersections or all samples generated via venn diagram analysis.

Differences and commonalities between HLCs, fetal liver and PHH are assessed by statistical tests vs. iPSCs and pairwise statistical tests of the three experiments vs. each other. Most genes (4953) are in the intersection set common to all three experiments. Pairwise intersections fetal liver/PHH have 2823 genes, HLCs/PHH 1699 genes and HLCs/fetal liver 988 genes

**Supplementary Table S10: Antibody list.**

List of antibodies used for immunofluorescence-based staining of cells.

### **Supplementary Table S11: Quantitative real-time PCR (qPCR) primer sequences.**

List of primer sequences used for quantitative real-time PCR.

## **Supplemental Methods**

### **Immunofluorescence-based detection of proteins**

The cells were fixed, permeabilized and stained for immunofluorescent imaging as described by Matz and Adjaye<sup>2</sup>. The list of primary and secondary antibodies used is provided in Supplementary Table S9. Nuclei were counter-stained with DAPI (100 ng/ml, Vector Laboratories, Burlingame, CA, USA, [www.vectorlabs.com](http://www.vectorlabs.com)). The fluorophores on the secondary antibodies were visualized using a Zeiss, LSM 510 Meta confocal microscope with a connected camera for microscopy model AxioCam ICc3 and the software Axiovision 4.6.

### **Quantitative Real-Time Polymerase Chain Reaction**

The Quantitative Real-Time Polymerase Chain Reaction (qPCR) was performed in 384-well Optical Reaction Plates (Applied BioSystems, Foster City, CA, <http://www.appliedbiosystems.com>). Reactions were carried out on the ABI PRISM 7900HT Sequence Detection System (Applied BioSystems) as previously described<sup>3</sup>. The amplifications were carried out in triplicates per gene with three wells as negative controls without template. *GAPDH* and  $\beta$ -*ACTIN* were amplified along with the target genes as endogenous control for normalization. The last heating step was performed with a ramp rate of 2% in order to generate a dissociation curve of the qPCR product. The output data generated by the SDS 2 software (Applied BioSystems) were transferred to MS Excel (Microsoft) for analysis. The differential mRNA expression of each gene was normalized against the *GAPDH* mRNA expression in the respective samples and calculated using the comparative Ct (threshold cycle) method ( $\Delta\Delta$ Ct method). Commercial bought fetal liver (Clontech, #636540) and PHH (Clontech, #636531) RNA was used. All primers which were used are listed in Supplementary Table S11.

### **Microarray -Based Gene Expression Analysis**

Quality of experiments at the bead-summary level is controlled by calculation of the Pearson correlation coefficient between all experiments vs. each other. These coefficients are condensed in a table marking value ranges of the correlation coefficients in different colors to enable detection of outliers. Additionally, a dendrogram is generated via the *plotSampleRelation* method from the R/Bioconductor lumi package to enable comparison of similarities between experimental samples and outlier finding by obvious mis-alignments in the dendrogram<sup>3-5</sup>.

Stage specific genes are determined via comparisons of subsequent differentiation stages: DE vs. E-iPSCs, HE vs. DE, HLCs vs. HE, Fetal liver vs. HLCs and PHH vs. fetal liver. Differentially up-

regulated genes in these comparisons are found with the criteria a) Illumina detection p-value  $< 0.05$  in the test case, b) ratio  $> 1.3333$  and c) limma-p-value  $< 0.05$  and limma-q-value  $< 0.05$ . Differentially down-regulated genes in these comparisons are found with the criteria a) Illumina detection p-value  $< 0.05$  in the control case, b) ratio  $< 0.75$  and c) limma-p-value  $< 0.05$  and limma-q-value  $< 0.05$ . The differentially expressed genes are subjected to pathway analysis via Consensus Path DB <sup>6</sup>.

Cytochromes, ABC transporter genes and several other transporter genes were filtered from the microarray experiments of iPSCs, definite endoderm (DE), hepatic endoderm (HE), hepatocyte-like cells (HLCs), fetal liver and primary human. Heat maps of these clusters were generated via the `heatmap2` function from R using Euclidean distance as distance measure.

Genes differentially expressed in HLCs vs. E-iPSCs, fetal liver vs. E-iPSCs and PHH vs. E-iPSCs were compared via a Venn diagram. Differential expression was termed significant if a) limma-p-value  $< 0.05$  and limma-q-value  $< 0.05$ , b) detection-p-value  $< 0.05$  at least in one of both conditions and c) ratio  $< 0.75$  or ratio  $> 1.33$ .

In order to detect differences between the three experiments in more detail an analysis of variance (ANOVA) was employed to filter genes followed by pairwise t-tests. Genes were termed significant if a) anova-p-value  $< 0.05$  and anova-q-value  $< 0.05$ , b) t-test p-value  $< 0.05$  and t-test q-value  $< 0.05$  and c) detection-p-value  $< 0.05$  at least in one of both conditions.

#### *K-means clustering and analysis of differentiation-stage-specific clusters*

Expression profiles of all genes are analyzed via k-means clustering. In order to achieve a sufficient granularity  $k=100$  clusters are conceived. The *kmeans* clustering algorithm from the R/Bioconductor environment is applied for this task. The result of the clustering analysis is an association table of Illumina probes and genes to the 100 clusters. Plots of mean and standard deviation of all genes' expression over all HLC differentiation phases are condensed for all clusters. Heatmaps of these clusters are generated via the `heatmap2` function from R.

Stage-specific clusters containing genes which are prominently expressed in dedicated stages of the differentiation were extracted from the k-means clustering. Five clusters were selected representing stages iPSC (containing POU5F1), definite endoderm (containing SOX17), hepatic endoderm, hepatocyte-like cells, fetal liver (containing AFP) and primary human hepatocyte (containing ALB). The gene sets from these clusters were subjected to transcription factor analysis via oPOSSUM3 <sup>7</sup> single site analysis using default parameters with the exception of restricting the amount of upstream / downstream sequence to 2000/2000 bases. Networks were drawn via the R package *network* scaling transcription factor nodes proportional to the oPOSSUM z-score and using a threshold of  $z > 3$ .

microRNA analysis is based upon TargetScan 6.2 predictions <sup>8</sup>. Genes from stage-specific k-means clusters are analysed for over-representation in gene sets regulated by the same microRNA. P-values are calculated via the hypergeometric test. False-Discovery rate is assessed using q-values <sup>9</sup>. P-values and q-values  $< 0.05$  are marked in red.

### *Tissue type prediction*

In order to check the tissue type of the HLCs the application of a tissue prediction tool was considered. At the time when this manuscript was written the CellNet<sup>10</sup> tool was not able to test data from the Illumina Human HT12 platform. Therefore it was decided to use the tool KeyGenes<sup>11</sup>. Although KeyGenes was developed for Next-Generation-Sequencing data there it provides the possibility to generate own training sets. A training was set up to fit the Illumina Human platform thus avoiding technical bias introduced by differing microarray platforms. Data sets for the Illumina human platform were downloaded from NCBI GEO for tissues brain (GSE29378)<sup>12</sup>, kidney (GSE43974)<sup>13</sup>, lung (GSE63459), intestine (GSE48634), heart (GSE64189) and liver (GSE25744)<sup>14</sup>. These data sets were normalized via quantile normalization from the R/Bioconductor<sup>4</sup> package preprocessCore and transformed to a logarithmic scale (base 2). The training data set was generated from them via the R script provided at the KeyGenes web site (www.keygenes.nl)<sup>12</sup>. The test set was produced by filtering genes from k-means cluster 9 which had a peak at HLC from the quantile normalized log2-transformed Illumina data. HLCs, fetal liver and primary human hepatocytes samples were used for the test set.

### *Analysis of tissues associated with expressed genes*

Association of genes' expression with tissues was retrieved from the PaGenBase database version 1.0<sup>15</sup>. The collection of datasets for specific genes for Homo sapiens/tissue was used for this analysis thus basing it on a combination of microarray and next-generation sequencing data. Genes exclusively expressed (detection p-value<0.05) in HLC cells but not in DE cells and not in HE cells were mapped to PaGenBase tissues.

### *Transcription factor analysis*

The oPOSSUM database<sup>7</sup> was downloaded in June 2014 and Single Site Analysis was performed on this local instance to detect over-represented conserved transcription factor binding sites in a set of progenitor associated genes. This analysis was parameterized to use species "human", 2000 base pairs upstream and downstream each, use only JASPAR Transcription Factor Binding Site (TFBS) profile matrices which belong to the tax group "vertebrates", a minimum relative TFBS position weight matrix (PWM) score of 0.85 and a minimum information content (specificity) of JASPAR TFBS profile matrices of 8.

The network was drawn based on the results of the oPOSSUM analysis using only transcription factors surpassing a predefined for the Z-Score. The Z-Score shows if in the investigated up- and

downstream regions of the set of genes there are more TFBS than in the background. For Supp. Fig. 3 we used a threshold of 3 while for fig. 6 we used a relatively restrictive threshold of 10 to focus on the core regulatory network. For all transcription factors above this threshold we extracted the conserved binding sites from the oPOSSUM analysis output and connected them with the transcription factor itself as edges in the graph. For the drawing and layout of the graph we employed the R package *network* (<http://www.jstatsoft.org/v24/i02/paper> (Accessed February 26, 2015) <sup>16</sup> which was instructed to draw red circles for genes and green circles with sizes corresponding to the Z-scores for the transcription factors.

## References

- 1 Jozefczuk, J., Prigione, A., Chavez, L. & Adjaye, J. (2011). Comparative analysis of human embryonic stem cell and induced pluripotent stem cell-derived hepatocyte-like cells reveals current drawbacks and possible strategies for improved differentiation. *Stem Cells Dev* **20**, 1259-75.
- 2 Matz, P., and Adjaye, J. Generation of iPSC line epiHUVeC from human umbilical vein endothelial cells. *Stem Cell Research*. **15**, 581-583 (2015).
- 3 Ihaka, R. G. R. R: A Language for Data Analysis and Graphics. *Journal of Computational and Graphical Statistics*. **3**, 299–314 (1996).
- 4 Gentleman, R. C., *et al.* Bioconductor: open software development for computational biology and bioinformatics. *Genome Biol.* **5**, R80 (2004).
- 5 Du, P., Kibbe, W. A. & Lin, S. M. lumi: a pipeline for processing Illumina microarray. *Bioinformatics*. **24**, 1547-1548 (2008).
- 6 Kamburov, A., *et al.* ConsensusPathDB: toward a more complete picture of cell biology. *Nucleic Acids Res.* **39**, D712--D717 (2011).
- 7 Kwon, A. T., Arenillas, D. J., Worsley, Hunt R. & Wasserman, W. W. oPOSSUM-3: advanced analysis of regulatory motif over-representation across genes or ChIP-Seq datasets. *G3 (Bethesda)*. **2**, 987-1002 (2012).
- 8 Lewis, B. P., Burge, C. B. & Bartel, D. P. Conserved seed pairing, often flanked by adenosines, indicates that thousands of human genes are microRNA targets. *Cell*. **120**, 15-20 (2005).
- 9 Storey, J. D. A Direct Approach to False Discovery Rates. *Journal of the Royal Statistical Society: Series B (Statistical Methodology)*. **64**, 479–98 (2002).
- 10 Cahan, P. *et al.* CellNet: network biology applied to stem cell engineering. *Cell* **158**, 903–915 (2014).
- 11 Roost, M. S. *et al.* KeyGenes, a Tool to Probe Tissue Differentiation Using a Human Fetal Transcriptional Atlas. *Stem Cell Rep.* **4**, 1112–1124 (2015).



- 12 Miller, J. A., Woltjer, R. L., Goodenbour, J. M., Horvath, S. & Geschwind, D. H. Genes and pathways underlying regional and cell type changes in Alzheimer's disease. *Genome Med.* **5**, 48 (2013).
- 13 Damman, J. *et al.* Hypoxia and Complement-and-Coagulation Pathways in the Deceased Organ Donor as the Major Target for Intervention to Improve Renal Allograft Outcome. *Transplantation* **99**, 1293–1300 (2015).
- 14 Jozefczuk, J., Prigione, A., Chavez, L. & Adjaye, J. Comparative Analysis of Human Embryonic Stem Cell and Induced Pluripotent Stem Cell-Derived Hepatocyte-Like Cells Reveals Current Drawbacks and Possible Strategies for Improved Differentiation. *Stem Cells Dev.* **20**, 1259–1275 (2010).
- 15 Pan, J. B., *et al.* PaGenBase: a pattern gene database for the global and dynamic understanding of gene function. *PLoS One.* **8**, e80747 (2013).
- 16 Butts, C. network: A Package for Managing Relational Data in R. *J Stat Softw.* 2008.



| Category     | Term                                                  | Count | %    | PValue   |
|--------------|-------------------------------------------------------|-------|------|----------|
| KEGG_PATHWAY | hsa00830:Retinol metabolism                           | 3     | 8.11 | 0.006825 |
| KEGG_PATHWAY | hsa00980:Metabolism of xenobiotics by cytochrome P450 | 3     | 8.11 | 0.008375 |
| KEGG_PATHWAY | hsa00982:Drug metabolism                              | 3     | 8.11 | 0.008925 |
| KEGG_PATHWAY | hsa00071:Fatty acid metabolism                        | 2     | 5.41 | 0.09051  |
| KEGG_PATHWAY | hsa00983:Drug metabolism                              | 2     | 5.41 | 0.096986 |
| KEGG_PATHWAY | hsa00350:Tyrosine metabolism                          | 2     | 5.41 | 0.099135 |

**B**

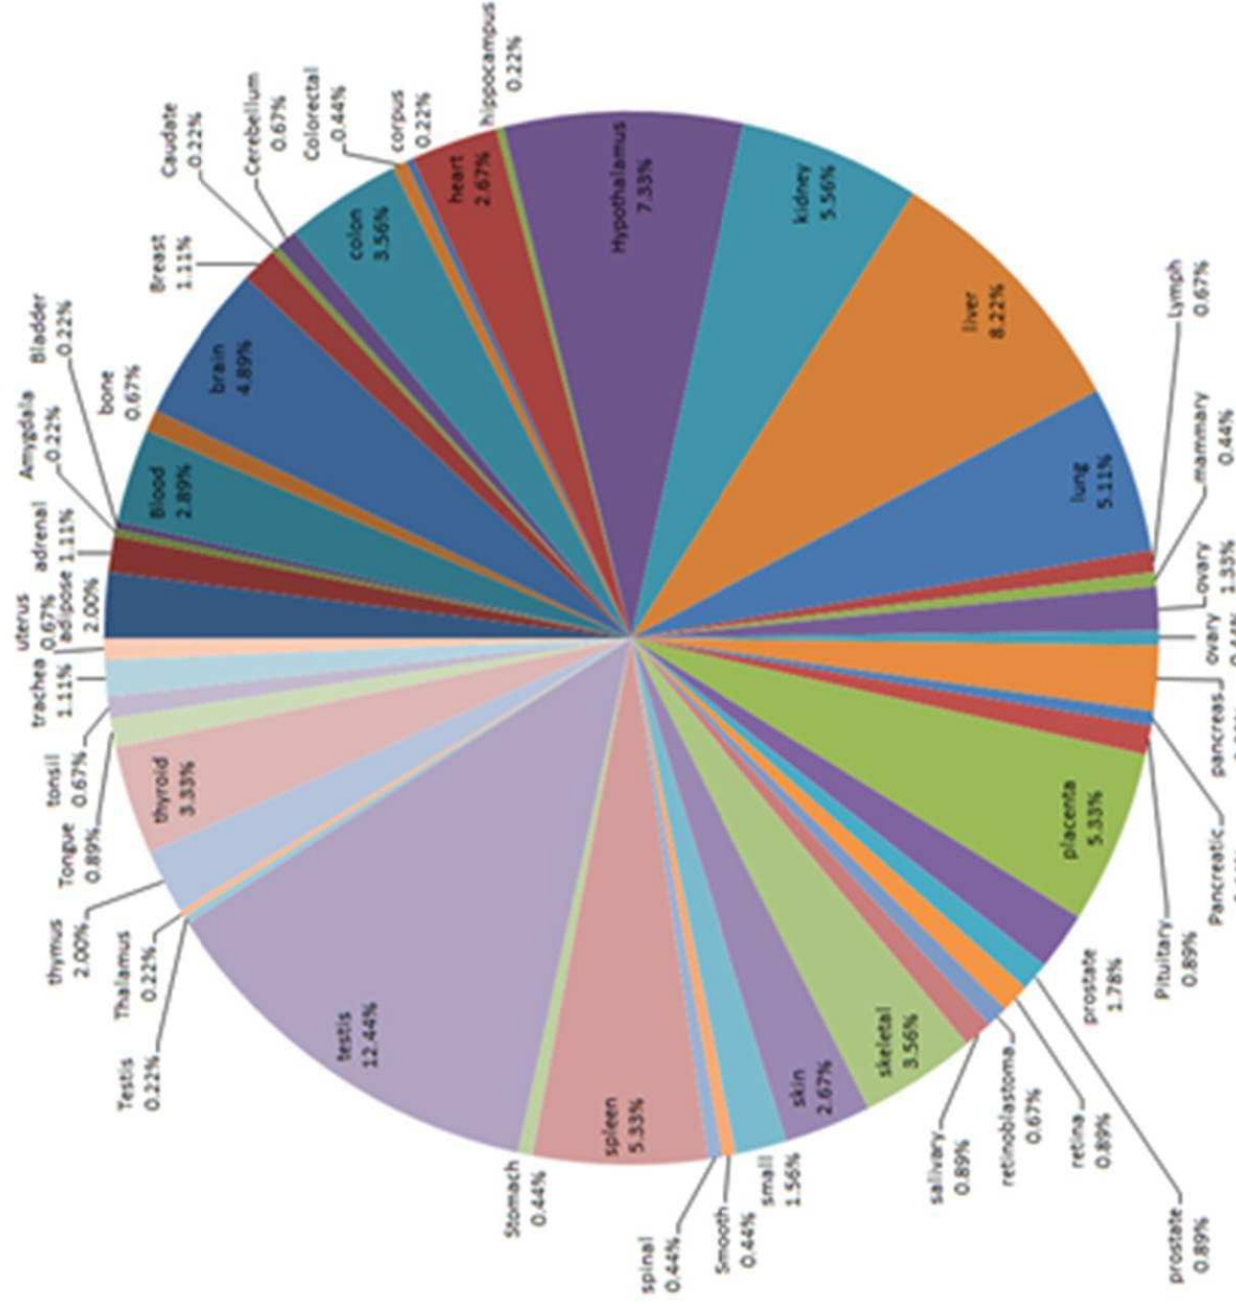

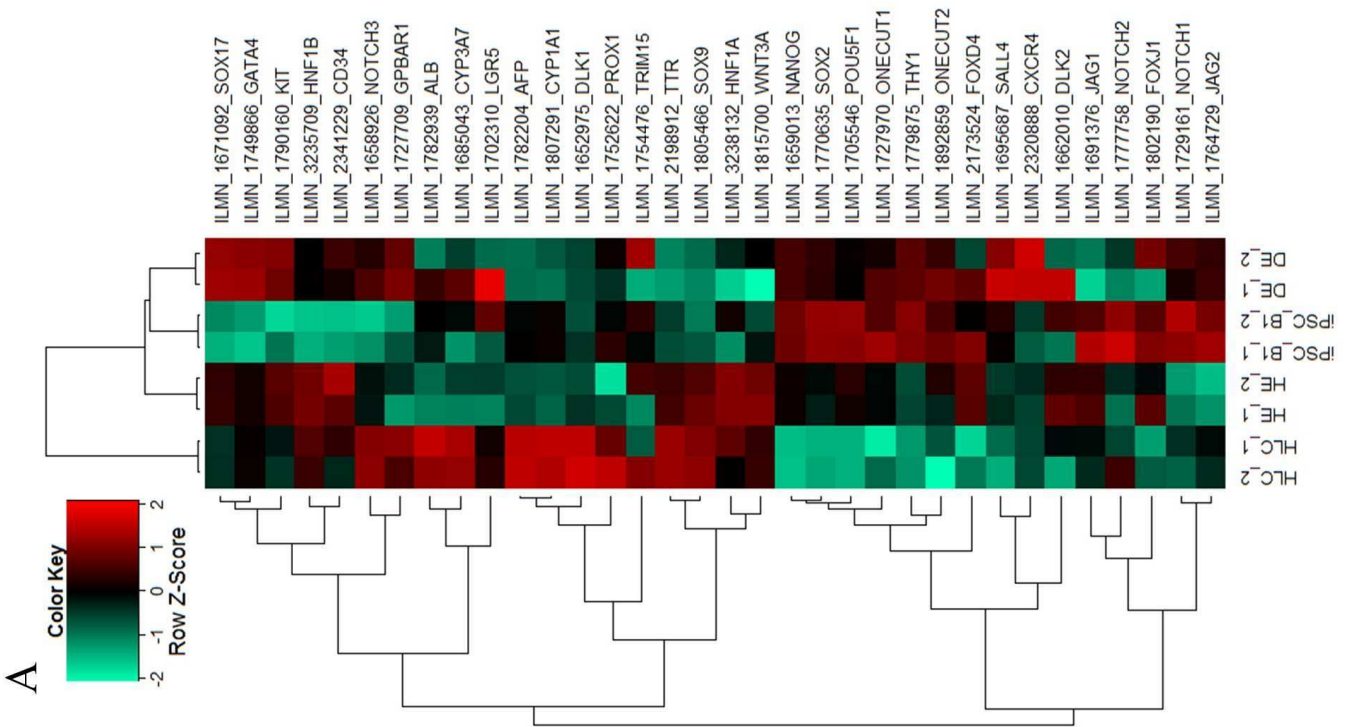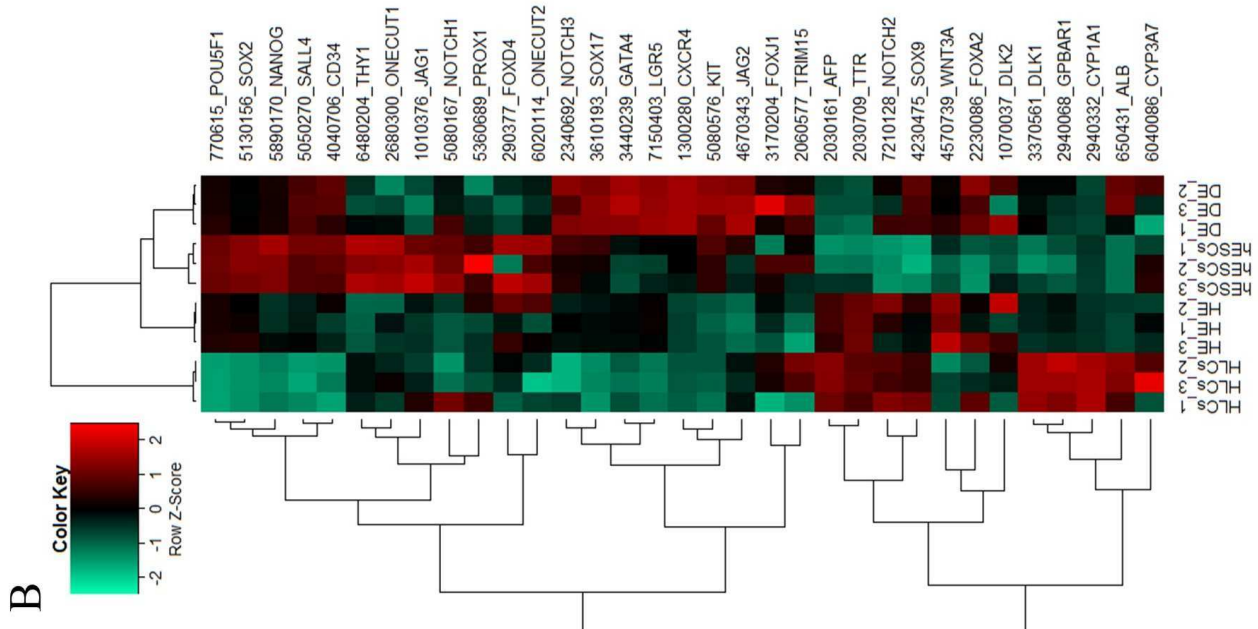

**A**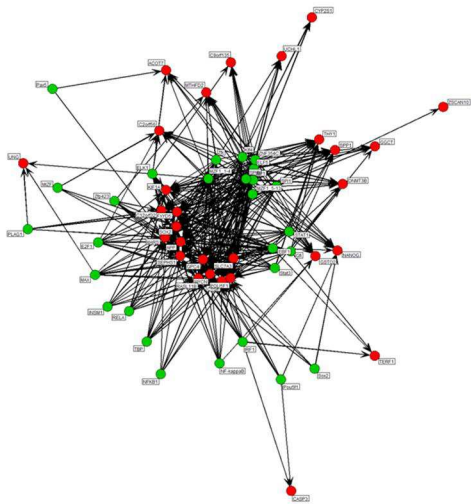**B**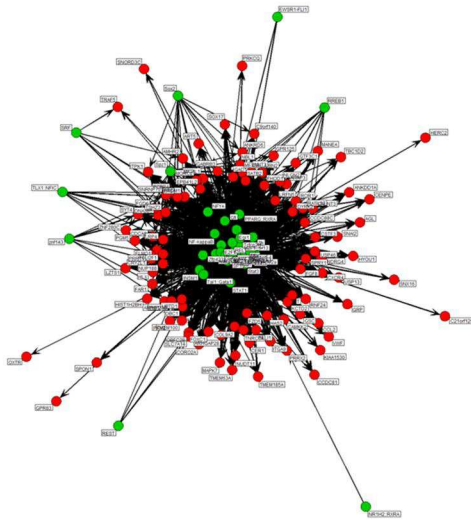**C**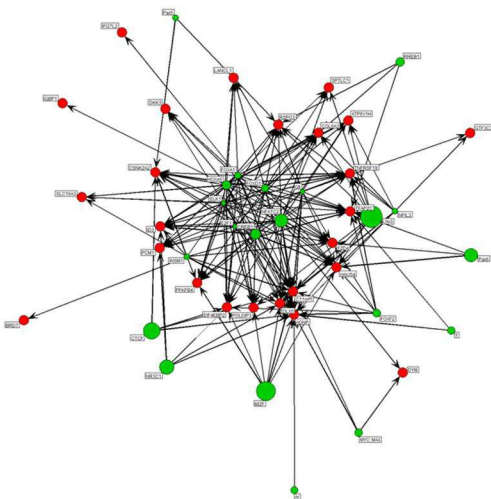**D**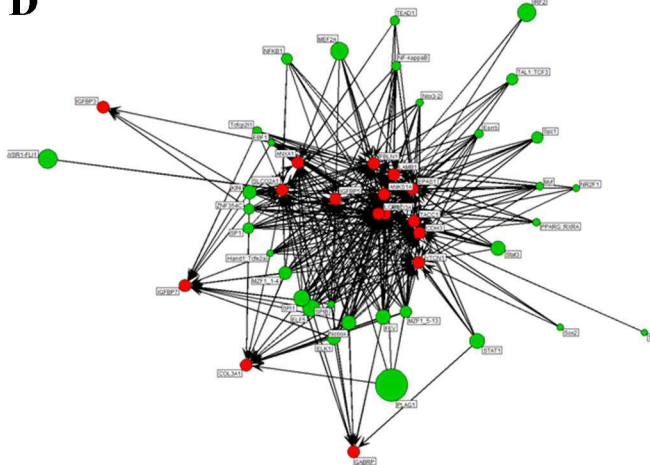**E**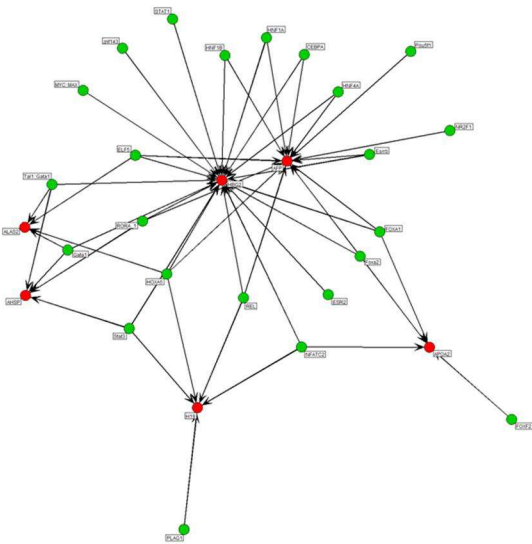**F**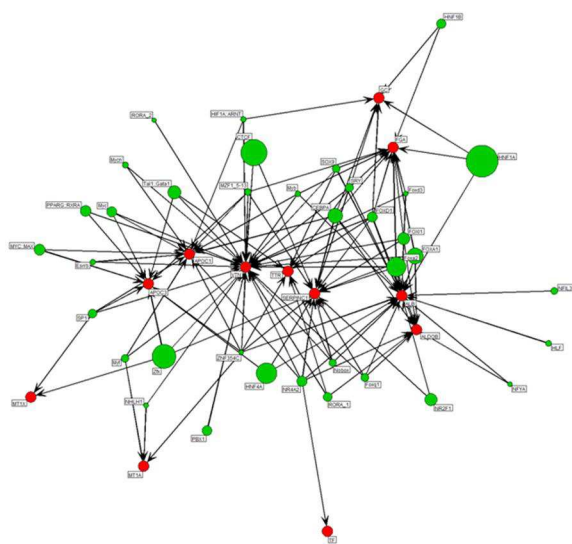

**A**

- POU5F1
- SOX2
- NANOG
- HNF1A
- HNF1B
- LGR5
- ONECUT1
- ONECUT2
- ALB
- AFP
- TTR
- SOX17
- SALL4
- GPBAR1
- DLK1
- DLK2
- KIT
- CD34
- THY1
- CYP3A7
- CYP1A1
- TRIM15
- WNT3A
- SOX9
- NOTCH1
- NOTCH2
- NOTCH3
- JAG1
- JAG2
- FOXD4
- FOXJ1
- PROX1
- CXCR4
- GATA4

- iPSC/ESC
- DE
- HE
- HLC

Z-score vs. TF profile %GC composition

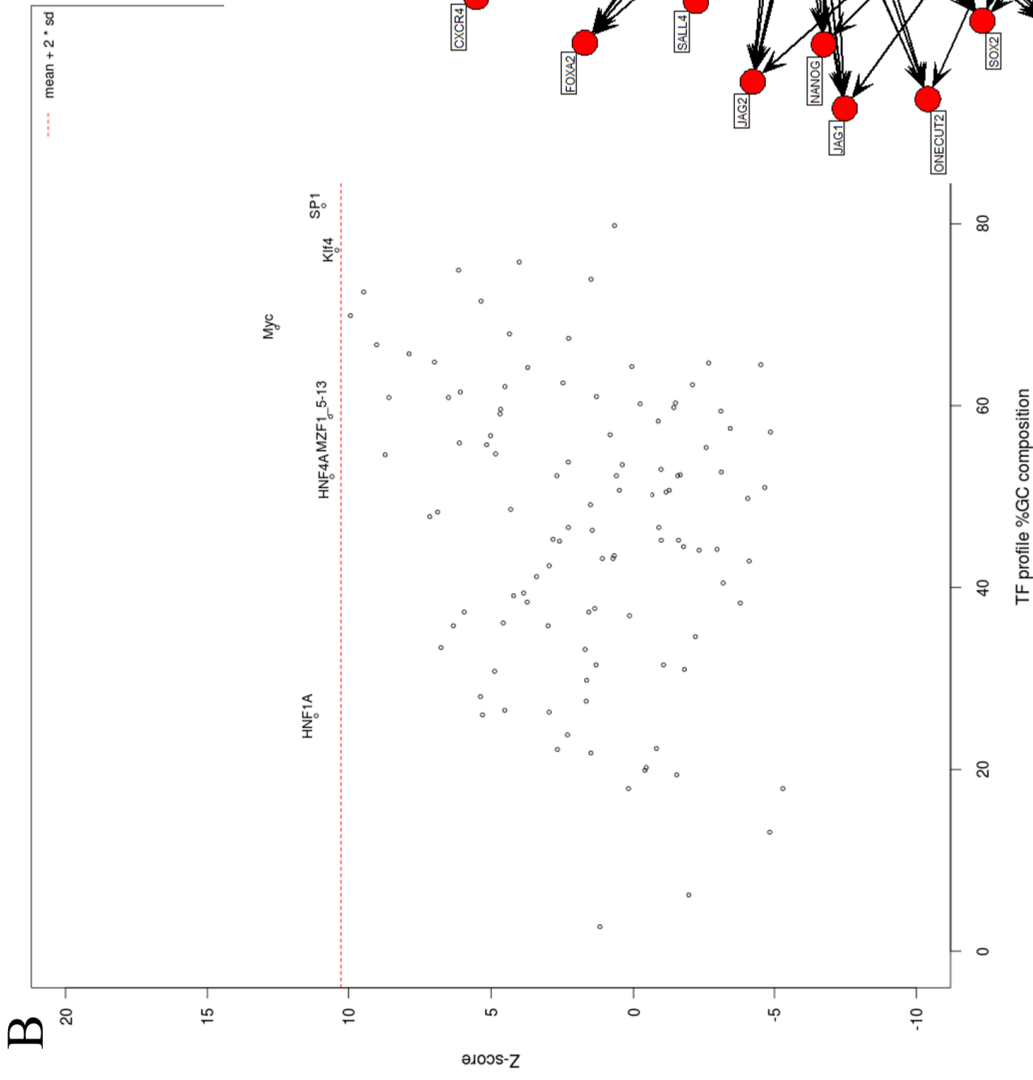

**B**

**C**

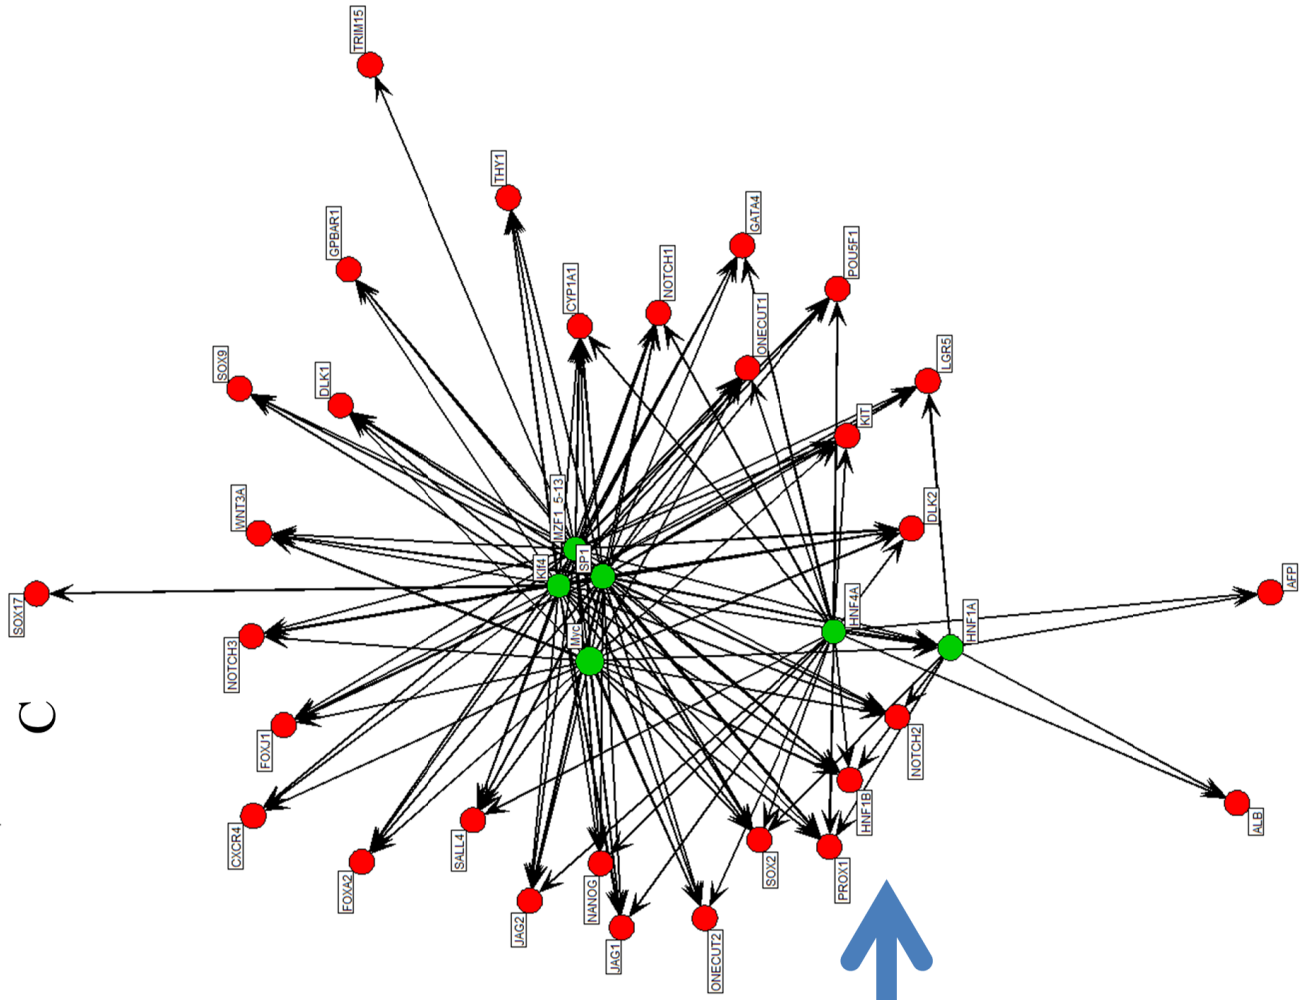

Transcription factor analysis via oPOSSUM3

Supplementary Table S1: KeyGenes corresponding to Figure 4E.

| A         | HLC_1      | HLC_2      | fetal_liver_1 | fetal_liver_2 | PHH_1      | PHH_2      |
|-----------|------------|------------|---------------|---------------|------------|------------|
| brain     | 0,00872249 | 0,00356035 | 0,00095596    | 0,00077447    | 0,00128284 | 0,00129498 |
| heart     | 0,00202789 | 0,00126442 | 0,00045451    | 0,00091234    | 0,00203436 | 0,00299791 |
| intestine | 0,00058457 | 0,00194039 | 0,00044729    | 0,00040809    | 0,00748768 | 0,00180078 |
| kidney    | 0,05411781 | 0,09250339 | 0,00736333    | 0,00554801    | 0,003114   | 0,00645026 |
| liver     | 0,93235915 | 0,89657184 | 0,98934908    | 0,99221622    | 0,98571919 | 0,98730311 |
| lung      | 0,00218808 | 0,00415962 | 0,00142983    | 0,00014086    | 0,00036192 | 0,00015297 |

|           |                 |                 |                 |                 |
|-----------|-----------------|-----------------|-----------------|-----------------|
| B brain   | ENSG0000010     | ENSG0000014     | ENSG0000016     | ENSG00000166963 |
| heart     | ENSG00000118194 |                 |                 |                 |
| intestine | ENSG0000014     | ENSG0000018     | ENSG00000260027 |                 |
| kidney    | ENSG0000006     | ENSG0000013     | ENSG0000018     | ENSG00000260027 |
| liver     | ENSG0000013     | ENSG0000014     | ENSG00000155066 |                 |
| lung      | ENSG0000006     | ENSG00000173391 |                 |                 |

Supplementary Table 2: Gene lists of venn diagram Figure 5A.

| hlc_expr | fetal_liver_expr | hlc_expr<br>AND<br>fetal_liver_expr | phh_expr  | hlc_expr<br>AND<br>phh_expr |
|----------|------------------|-------------------------------------|-----------|-----------------------------|
| A2ML1    | ABCC13           | ABCA4                               | A1BG      | AASS                        |
| A4GALT   | ABI3             | ABCC10                              | ABCA10    | ABCA2                       |
| A4GNT    | ABI3BP           | ABCC4                               | ABCG4     | ABHD11                      |
| AADA4L4  | ABLIM2           | ABCG2                               | ABHD1     | ABHD7                       |
| ABCA11   | ACAP1            | ACRC                                | ACBD5     | ABL2                        |
| ABHD12B  | ACPT             | ACSL4                               | ACSM1     | ACBD4                       |
| ABHD9    | ACRBP            | ACSS1                               | ADAMTS15  | ACER3                       |
| ACBD7    | ACSBG1           | ACTA1                               | ADCYAP1R1 | ADCY1                       |
| ACCN3    | ACSL6            | ACTG2                               | ADH1B     | AGR2                        |
| ACPP     | ADAM12           | ADAMTS7                             | AFAR3     | AIM1                        |
| ACRV1    | ADAMTS5          | ADAMTS9                             | AKR7L     | AIM1L                       |
| ACTC1    | ADD2             | ADAMTSL1                            | ALOXE3    | AKR1B10                     |
| ADAM2    | ADRA2C           | ADAT2                               | ALS2CL    | AKR1B15                     |
| ADAM8    | ALOX12           | ADCY3                               | ALS2CR12  | ALK                         |
| ADAMTS18 | AMN              | ADCY4                               | ALX3      | ALPI                        |
| ADAMTS19 | AMPH             | ADORA2A                             | ANKRD29   | ALPK2                       |
| ADAMTS2  | ANAPC7           | ADORA2B                             | AOX1      | AMAC1L2                     |
| ADAMTS20 | ANK1             | ADPRH                               | APLN      | AMY2B                       |
| ADAMTS3  | ANKAR            | AEBP1                               | APOL1     | ANKRD1                      |
| ADAMTS6  | ANKLE1           | AFAP1                               | AQP7      | ANKRD20B                    |
| AFF2     | ANKRD53          | AFAP1L2                             | AQP9      | ANXA8                       |
| AHDC1    | AOAH             | AFF3                                | ARID5A    | ANXA8L2                     |
| AHNAK2   | APCDD1           | AGPAT4                              | ARL14     | ARAP2                       |
| AKAP2    | APOBEC2          | AHCYL2                              | ARP11     | ARFGEF2                     |
| AKT3     | ARFRP1           | AHI1                                | ASIP      | ARHGEF16                    |
| ALDH1A3  | ARHGAP5          | AHSP                                | ASPHD1    | ARL4C                       |
| ALDH1L2  | ARHGDIG          | AIM2                                | ATOH8     | ARMC9                       |
| ALDH3B2  | ARHGFE9          | AKAP10                              | ATP6V0D2  | ARRDC1                      |
| ALG10    | ARL9             | ALG10B                              | BAI1      | ASPH                        |
| ALKBH8   | ARMC2            | ALMS1                               | BDH2      | ATHL1                       |
| ALMS1P   | ARMC4            | ALOX15                              | BOLA2B    | ATP13A3                     |
| ALPPL2   | ARTN             | AMHR2                               | C10orf108 | ATP6V0A4                    |
| ALS2CR16 | ASCL2            | ANAPC2                              | C10orf21  | ATP6V1E2                    |
| AMBRA1   | ATOH7            | ANGPT1                              | C11orf91  | B3GNT3                      |
| AMH      | ATP1B2           | ANGPTL2                             | C12orf34  | B4GALNT4                    |
| AMN1     | AZU1             | ANK3                                | C12orf39  | BACH1                       |
| ANGPT2   | B3GALT2          | ANKRD32                             | C12orf56  | BAK1                        |
| ANKDD1A  | BAI3             | ANKRD41                             | C12orf8   | BEX5                        |
| ANKRD34A | BCL2L14          | ANKRD52                             | C14orf11  | BIK                         |
| ANKRD36  | BEST1            | ANLN                                | C14orf121 | BLOC1S2                     |
| ANKS1B   | BPI              | ANO2                                | C14orf126 | BTN2A2                      |
| ANKS3    | BSPH1            | ANTXR1                              | C14orf21  | C11orf36                    |
| ANO9     | BST1             | AP1GBP1                             | C17orf67  | C12orf49                    |
| ANXA8L1  | BZRPL1           | AP1M2                               | C19orf36  | C12orf5                     |
| AP3B2    | C10orf105        | AP3M2                               | C1orf200  | C13orf31                    |
| APCDD1L  | C11orf21         | AP4M1                               | C21orf63  | C14orf118                   |
| APLF     | C14orf162        | APEG1                               | C21orf71  | C14orf181                   |
| APLP1    | C15orf34         | APLN                                | C3orf41   | C14orf78                    |
| AQP10    | C16orf30         | APOBEC3D                            | C4B       | C15orf48                    |
| ARHGAP27 | C16orf38         | APOLD1                              | C5orf46   | C16orf67                    |



|           |           |           |          |               |
|-----------|-----------|-----------|----------|---------------|
| ARHGAP29  | C17orf76  | AQP1      | C6orf122 | C17orf108     |
| ARHGAP6   | C17orf87  | ARHGAP11B | C6orf142 | C19orf71      |
| ARL13B    | C18orf1   | ARHGAP15  | C6orf222 | C22orf33      |
| ARNT2     | C18orf51  | ARHGAP18  | C6orf27  | C2orf15       |
| ARSK      | C19orf59  | ARHGAP20  | C7orf65  | C2orf21       |
| ASAM      | C19orf67  | ARHGAP22  | C8orf30B | C3orf33       |
| ASPHD2    | C1orf101  | ARHGAP25  | C8orf46  | C3orf52       |
| ASRGL1    | C1orf175  | ARHGAP28  | C8ORFK29 | C4A           |
| ATP10B    | C1orf186  | ARHGAP8   | C9       | C6orf1        |
| ATP12A    | C1orf38   | ARHGEF17  | CADM3    | C6orf141      |
| ATP2C2    | C1orf92   | ARHGEF3   | CALCA    | C6orf163      |
| ATP6V1B1  | C1QTNF4   | ARL17P1   | CAMK2B   | C6orf204      |
| ATP6V1C2  | C20orf132 | ARMCX1    | CCDC103  | C7orf53       |
| ATP6V1G2  | C20orf175 | ARMCX2    | CCDC88B  | CAMK2D        |
| ATP8B1    | C21orf67  | ARMCX4    | CCK      | CAMTA2        |
| ATRX      | C21orf69  | ART5      | CCL13    | CBLC          |
| AURKAPS1  | C2CD4C    | ASAP1IT1  | CCR2     | CBX8          |
| B3GALNT2  | C2orf3    | ASCL5     | CD200    | CCDC126       |
| B3GALTL   | C2orf32   | ATG2B     | CD300E   | CCDC17        |
| B3GNT5    | C2orf40   | ATP2A3    | CD40     | CCNO          |
| BAALC     | C2orf88   | ATP6AP1L  | CDC27    | CDCP1         |
| BAHCC1    | C2orf89   | ATP7A     | CDC37L1  | CDK8          |
| BAI2      | C3AR1     | ATXN2L    | CDH15    | CDKN2A        |
| BAPX1     | C3orf22   | AURKA     | CES4     | CDKN2C        |
| BATF3     | C3orf32   | AURKB     | CH25H    | CEP170        |
| BCAR4     | C3orf71   | B3GALNT1  | CHAD     | CFHR3         |
| BCL11B    | C4orf37   | B3GALT4   | CHADL    | CHST9         |
| BCMO1     | C5AR1     | B3GNT8    | CHRDL2   | CIDEA         |
| BEND4     | C5orf20   | B3GNTL1   | CHST4    | CLCF1         |
| BEND6     | C6orf184  | B4GALT6   | CLIP4    | CLTCL1        |
| BICD1     | C7        | BACH2     | CLU      | CNNM4         |
| BMP5      | C8orf77   | BAGE5     | CLUL1    | CNTNAP2       |
| BNC1      | C8orf79   | BARD1     | CNDP1    | COL11A2       |
| BNC2      | C9orf84   | BBS12     | COPZ2    | CRCT1         |
| BOC       | CA1       | BCAM      | COX16    | CSDC2         |
| BRWD3     | CACNA1I   | BCAT1     | CPLX1    | CST6          |
| BVES      | CALCRL    | BCL11A    | CSAG3A   | CXorf21       |
| C10orf39  | CAMP      | BCL2      | CSAG3B   | CYP1A1        |
| C10orf41  | CAPN11    | BDP1      | CSF1     | CYP1B1        |
| C10orf73  | CARD9     | BEND5     | CTRB1    | CYP26A1       |
| C10orf82  | CAV3      | BEX4      | CXCL13   | CYP2D7P1      |
| C11orf47  | CBFA2T3   | BIRC5     | CXCL2    | CYP2E1        |
| C11orf70  | CBLN4     | BLM       | CXCL6    | DAB2IP        |
| C12orf64  | CCDC111   | BMP6      | CYP1A2   | DALRD3        |
| C14orf125 | CCDC26    | BMP7      | CYP27B1  | DCAF4L1       |
| C14orf176 | CCDC27    | BMPER     | CYP2A6   | DDIT4L        |
| C14orf37  | CCDC52    | BNIPL     | CYP2A7   | DDX3Y         |
| C15orf33  | CCDC81    | BPTF      | CYP2B6   | DHH           |
| C15orf59  | CCDC88A   | BRAF      | CYP2B7P1 | DHRS2         |
| C16orf54  | CCL21     | BRSK1     | CYP2C18  | DIRAS3        |
| C16orf55  | CCL23     | BRUNOL6   | CYP2C19  | DKFZP564O0523 |
| C16orf74  | CCL8      | BSN       | CYP2C9   | DKFZp667M2411 |
| C16orf88  | CCR1      | BSPRY     | CYP3A4   | DMRTA1        |
| C17orf47  | CCR10     | BTK       | CYP4F11  | DNAJC2        |
| C17orf69  | CCR9      | BTRC      | CYP4F22  | DNAJC25-GNG10 |
| C17orf78  | CCRL2     | BUB1      | CYP7A1   | DNTTIP2       |

|           |         |           |               |          |
|-----------|---------|-----------|---------------|----------|
| C17orf82  | CD163L1 | BUB1B     | CYSLTR2       | DOCK9    |
| C18orf45  | CD180   | C10orf128 | DAO           | DSEL     |
| C19orf21  | CD19    | C10orf33  | DAPK2         | DUSP27   |
| C19orf39  | CD1A    | C10orf51  | DDTL          | DZIP1L   |
| C19orf69  | CD209   | C10orf78  | DDX20         | EDN1     |
| C1orf102  | CD300A  | C10orf88  | DDX25         | EEA1     |
| C1orf105  | CD300C  | C11orf61  | DERPC         | EEF1A2   |
| C1orf133  | CD33    | C11orf82  | DGCR5         | EFCAB7   |
| C1orf161  | CD36    | C11orf84  | DIS3          | EFHC1    |
| C1orf170  | CD37    | C12orf48  | DKFZp564N2472 | EGLN3    |
| C1orf187  | CD38    | C12orf60  | DKFZp686K1684 | EGR2     |
| C1orf189  | CD4     | C12orf68  | DNAJC16       | EIF2C4   |
| C1orf190  | CD48    | C13orf18  | DOCK5         | EIF5A2   |
| C1orf213  | CD53    | C13orf3   | DOK7          | ELK4     |
| C1orf215  | CD5L    | C13orf34  | DSG1          | ENAH     |
| C1orf229  | CDADC1  | C14orf145 | DUXA          | EPHB6    |
| C1orf61   | CEACAM8 | C14orf19  | DYNC1LI1      | ESM1     |
| C1orf64   | CETP    | C15orf20  | DYSFIP1       | EXOC8    |
| C1orf81   | CFHR4   | C15orf21  | ECEL1         | EYA2     |
| C1orf88   | CFP     | C15orf27  | ECT2L         | F2RL1    |
| C1orf96   | CHAC2   | C15orf28  | EDAR          | F8A3     |
| C20orf12  | CHRNA10 | C15orf42  | EIF3CL        | FAM114A1 |
| C20orf151 | CHRNB4  | C16orf62  | ENTPD8        | FAM45B   |
| C20orf75  | CISH    | C16orf79  | EPHA3         | FAM46B   |
| C21orf129 | CLC     | C17orf41  | EPHA6         | FAM59A   |
| C21orf49  | CLDN2   | C17orf44  | EREG          | FAM76A   |
| C21orf81  | CLEC10A | C17orf65  | ERO1LB        | FBLIM1   |
| C2orf54   | CLEC12A | C17orf75  | ESR1          | FBXO16   |
| C2orf67   | CLEC1B  | C17orf80  | F2RL3         | FEM1B    |
| C3orf15   | CLEC3B  | C17orf98  | FAM139A       | FER1L5   |
| C3orf18   | CLEC4D  | C18orf2   | FAM150B       | FGD6     |
| C3orf67   | CLEC4G  | C18orf26  | FAM57B        | FGF2     |
| C3orf72   | CLEC4M  | C18orf54  | FAM71E2       | FLJ10781 |
| C4orf10   | CLIC2   | C19orf33  | FAM80A        | FLJ10996 |
| C4orf16   | CMAH    | C19orf38  | FANCA         | FLJ26850 |
| C4orf31   | CMPK2   | C1orf106  | FAS           | FLJ35024 |
| C4orf39   | CMTM1   | C1orf116  | FBXO25        | FLJ41200 |
| C4orf43   | CMTM2   | C1orf135  | FCAMR         | FLJ41484 |
| C4orf49   | CMTM5   | C1orf152  | FGF19         | FOSL1    |
| C5orf27   | COL14A1 | C1orf156  | FGF21         | FOXP4    |
| C6orf100  | COL9A1  | C1orf165  | FGF6          | GABRB3   |
| C6orf132  | COLEC10 | C1orf21   | FGF9          | GALR2    |
| C6orf134  | CORO1A  | C1orf24   | FIS           | GAN      |
| C6orf148  | CPA3    | C1orf26   | FLJ10661      | GARNL3   |
| C6orf168  | CR1L    | C1orf59   | FLJ20397      | GATA6    |
| C6orf199  | CRB1    | C1orf89   | FLJ21687      | GBAP     |
| C6orf221  | CSH1    | C1orf95   | FLJ35785      | GGTL3    |
| C6orf25   | CSH2    | C1QTNF1   | FLJ38379      | GHRHR    |
| C6orf52   | CSPG4   | C1QTNF5   | FLJ40330      | GMIP     |
| C6orf54   | CST7    | C20orf117 | FLJ42289      | GPC1     |
| C6orf81   | CTSG    | C20orf160 | FLJ42709      | GPR153   |
| C8orf16   | CUGBP2  | C20orf194 | FLJ44790      | GPR64    |
| C9orf126  | CX3CR1  | C20orf196 | FLJ45422      | GPRC5A   |
| C9orf135  | CXADRP3 | C20orf94  | FLJ45966      | GPRC5B   |
| C9orf164  | CXCL17  | C21orf122 | FOXD2         | GRAMD1C  |
| C9orf58   | CXCL3   | C21orf128 | FRY           | GREM1    |

|          |          |          |              |              |
|----------|----------|----------|--------------|--------------|
| C9orf61  | CXCR4    | C21orf56 | FSIP1        | GREM2        |
| C9orf93  | CXorf18  | C2orf37  | FSTL4        | GRHL1        |
| CA11     | CXorf59  | C2orf63  | FUNDC2       | GRIP2        |
| CA3      | CYBB     | C3orf62  | FUT5         | HAPLN4       |
| CABYR    | CYLC1    | C3orf70  | G0S2         | HDAC9        |
| CACNA1C  | CYSLTR1  | C4orf18  | GAGE5        | HES2         |
| CACNA2D2 | CYTH4    | C4orf29  | GBP3         | HHAT         |
| CACNA2D3 | CYTL1    | C4orf38  | GBP7         | HIST1H3D     |
| CACNG4   | DARC     | C5orf23  | GCK          | HIST1H3E     |
| CADM2    | DAZ2     | C5orf34  | GDA          | HIT-40       |
| CALCB    | DC36     | C5orf39  | GEM          | HIVEP1       |
| CALCR    | DCDC5    | C5orf42  | GEMIN7       | HSPB8        |
| CAPN14   | DCX      | C5orf53  | GFRA1        | ICOSLG       |
| CART1    | DEFA1    | C5orf54  | GJB3         | IER5L        |
| CASQ2    | DEFA1B   | C5orf62  | GLOD5        | IFIT3        |
| CCDC105  | DEFA3    | C6orf117 | GLT1D1       | IGF1         |
| CCDC113  | DEFA4    | C6orf124 | GNG12        | IL1RL1       |
| CCDC147  | DERL3    | C6orf167 | GPD1         | IL20RB       |
| CCDC149  | DLEC1    | C6orf182 | GPR141       | INPP4A       |
| CCDC153  | DNAJC11  | C6orf208 | GPR88        | IPPK         |
| CCDC33   | DNAJC28  | C6orf26  | GRIA3        | IQSEC2       |
| CCDC57   | DNASE1L3 | C6orf59  | GSDM1        | IRF6         |
| CCDC64B  | DNM3     | C7orf13  | GSTT2B       | ISM1         |
| CCDC9    | DNTT     | C8orf44  | GUCA2B       | KATNAL2      |
| CCDC96   | DOC2A    | C8orf51  | GZF1         | KCNF1        |
| CCKBR    | DOK2     | C8orf58  | HCG18        | KCNN2        |
| CCNA1    | DPEP2    | C9orf100 | HEPACAM      | KCTD11       |
| CDGAP    | DPEP3    | C9orf140 | HIST1H3A     | KCTD17       |
| CDH10    | DPF1     | C9orf167 | HNF4A        | KDM6B        |
| CDH13    | DPF3     | C9orf62  | HRCT1        | KIAA0284     |
| CDH17    | DPT      | C9orf66  | HSD11B1      | KIAA0672     |
| CDH26    | DSCR5    | CA14     | HSD17B13     | KIAA0895L    |
| CDH3     | DUSP21   | CA8      | HSF4         | KIAA1383     |
| CDH8     | DUSP26   | CACNB2   | HTR2B        | KISS1R       |
| CDKAL1   | E2F8     | CACNB3   | IBSP         | KLC4         |
| CDS1     | ECE1     | CACNG6   | IGSF9B       | KLF10        |
| CDX1     | EEFSEC   | CAMK1G   | IL12A        | KLF5         |
| CDX2     | EFCBP1   | CAMTA1   | IL15         | KRT18P19     |
| CDY1B    | ELANE    | CAPN13   | IL15RA       | KRT18P26     |
| CECR6    | ELN      | CASC5    | IL1RL2       | KRT18P30     |
| CEMP1    | ELTD1    | CC2D2A   | IL23A        | KRT18P34     |
| CEND1    | EMCN     | CCDC121  | IL6ST        | KRT18P42     |
| CERCAM   | EMILIN1  | CCDC136  | JMJD7        | KRT7         |
| CFTR     | EPB42    | CCDC137  | KAAG1        | KRT80        |
| CGB      | ESCO2    | CCDC138  | KCND3        | LAMB3        |
| CGB7     | ESRP2    | CCDC146  | KCNIP3       | LAMC2        |
| CHAC1    | F13A1    | CCDC15   | KIAA0467     | LARP6        |
| CHGB     | FABP3    | CCDC150  | KIAA0738     | LATS2        |
| CHRM3    | FAIM3    | CCDC151  | KIR2DS3      | LDHC         |
| CHRNA3   | FAM101B  | CCDC152  | KLHL15       | LMTK2        |
| CIZ1     | FAM109B  | CCDC3    | KLHL25       | LOC100128202 |
| CKMT1A   | FAM120C  | CCDC35   | KPNA7        | LOC100128269 |
| CKMT1B   | FAM124B  | CCDC41   | LGALS4       | LOC100128300 |
| CLCNKA   | FAM129C  | CCDC66   | LGALS9B      | LOC100128695 |
| CLDN18   | FAM178B  | CCDC74B  | LG11         | LOC100128822 |
| CLDN6    | FAM22A   | CCDC8    | LOC100127988 | LOC100129122 |

|            |          |          |              |              |
|------------|----------|----------|--------------|--------------|
| CLEC18C    | FAM26F   | CCDC99   | LOC100128295 | LOC100129138 |
| CLEC1A     | FAM65C   | CCNA2    | LOC100128340 | LOC100129147 |
| CLEC2L     | FAM99A   | CCNB1    | LOC100128781 | LOC100129720 |
| CLIC6      | FAM9A    | CCNB2    | LOC100130079 | LOC100130133 |
| CLSTN2     | FAT4     | CCNJ     | LOC100130311 | LOC100130383 |
| CNIH2      | FBXL17   | CCNJL    | LOC100130420 | LOC100130542 |
| CNR1       | FBXO43   | CCR7     | LOC100130426 | LOC100130808 |
| CNTN1      | FCER1A   | CD247    | LOC100130575 | LOC100130906 |
| CNTN4      | FCN1     | CD72     | LOC100130812 | LOC100131017 |
| COL11A1    | FCN2     | GDC2     | LOC100131071 | LOC100131076 |
| COL13A1    | FCRL2    | GDC20    | LOC100131091 | LOC100131176 |
| COL15A1    | FCRLA    | GDC42EP5 | LOC100131277 | LOC100131447 |
| COL22A1    | FDPSL2A  | GDC45L   | LOC100131390 | LOC100131460 |
| COL23A1    | FLJ11827 | CDC7     | LOC100131683 | LOC100131727 |
| COL4A6     | FLJ23834 | CDCA1    | LOC100131774 | LOC100131895 |
| COL9A2     | FLJ25404 | CDCA2    | LOC100132234 | LOC100131972 |
| COL9A3     | FLJ30430 | CDCA3    | LOC100132288 | LOC100132205 |
| CORO6      | FLJ32255 | CDCA5    | LOC100132506 | LOC100132354 |
| COX11      | FLJ36032 | CDCA7    | LOC100132552 | LOC100132494 |
| COX18      | FLJ36848 | CDCA8    | LOC100132655 | LOC100132910 |
| CPA4       | FLJ39639 | CDH11    | LOC100132738 | LOC100133075 |
| CPAMD8     | FLJ41170 | CDH5     | LOC100132888 | LOC100133211 |
| CPLX2      | FLJ41603 | CDH6     | LOC100132913 | LOC100133435 |
| CPNE2      | FLJ41733 | CDK3     | LOC100132967 | LOC100133438 |
| CPSF6      | FLJ44290 | CDKL2    | LOC100133033 | LOC100133572 |
| CRABP1     | FLJ44606 | CDKN3    | LOC100133050 | LOC100133866 |
| CRH        | FMO2     | CDT1     | LOC100133056 | LOC100134407 |
| CRIM1      | FNDC1    | CEACAM21 | LOC100133077 | LOC100134424 |
| CRISPLD1   | FOLR2    | CEACAM6  | LOC100133182 | LOC100134794 |
| CRLF1      | FOLR3    | CECR4    | LOC100133242 | LOC100134815 |
| CROCC      | FOXD4    | CEL      | LOC100133275 | LOC152586    |
| CROCCL1    | FOXD4L1  | CENPA    | LOC100133463 | LOC154860    |
| CROCCL2    | FOXJ1    | CENPE    | LOC100133479 | LOC168474    |
| CRSP6      | FOXS1    | CENPF    | LOC100133568 | LOC283922    |
| CRTC1      | FPR1     | CENPH    | LOC100133591 | LOC284371    |
| CRYBA1     | FPR3     | CENPI    | LOC100133719 | LOC387683    |
| CRYBA2     | FXN      | CENPK    | LOC100133724 | LOC388327    |
| CSGALNACT1 | FZD9     | CENPM    | LOC100133982 | LOC388514    |
| CSN1S1     | GAB3     | CENPO    | LOC100134081 | LOC388630    |
| CSNK1A1L   | GALNT14  | CENPP    | LOC100134210 | LOC388681    |
| CST1       | GALNT5   | CENPQ    | LOC100134226 | LOC388955    |
| CST4       | GALNT9   | CEP110   | LOC100134363 | LOC389641    |
| CTAGE5     | GAPT     | CEP135   | LOC100134712 | LOC400558    |
| CTTNBP2NL  | GATA1    | CEP152   | LOC121792    | LOC400578    |
| CUBN       | Gcom1    | CEP250   | LOC123876    | LOC400836    |
| CUX1       | GDF1     | CEP290   | LOC124220    | LOC401074    |
| CXCR6      | GFI1B    | CEP55    | LOC139735    | LOC401433    |
| CXorf23    | GFRA3    | CEP68    | LOC143941    | LOC401533    |
| CXXC4      | GGT5     | CFC1B    | LOC144383    | LOC401588    |
| CXXC6      | GH1      | CGA      | LOC145837    | LOC440160    |
| CYP46A1    | GH2      | CGB1     | LOC150223    | LOC440905    |
| DAD1L      | GIMAP1   | CGB5     | LOC165186    | LOC441151    |
| DBC1       | GIMAP4   | CGB8     | LOC197350    | LOC441442    |
| DCLK2      | GIMAP5   | CHAF1A   | LOC201175    | LOC442249    |
| DDR2       | GIMAP6   | CHAF1B   | LOC283155    | LOC554223    |
| DEFA6      | GIMAP7   | CHD3     | LOC283711    | LOC641983    |

|               |           |          |           |           |
|---------------|-----------|----------|-----------|-----------|
| DEFB116       | GIMAP8    | CHEK2    | LOC285016 | LOC642559 |
| DENND3        | GJA4      | CHN1     | LOC285141 | LOC642648 |
| DFNB31        | GKN2      | CHRNE    | LOC286297 | LOC642732 |
| DHX57         | GNA15     | CHST10   | LOC338756 | LOC642769 |
| DIRAS2        | GNAL      | CHST2    | LOC342979 | LOC643159 |
| DKFZP434L187  | GP9       | CHSY3    | LOC344382 | LOC644094 |
| DKFZp686J0529 | GPR101    | CHTF18   | LOC347487 | LOC644144 |
| DKKL1         | GPR182    | CIB2     | LOC348021 | LOC644150 |
| DLG2          | GPR34     | CILP     | LOC387723 | LOC644629 |
| DLL3          | GPR4      | CKAP2L   | LOC388503 | LOC644632 |
| DLX1          | GPR44     | CKMT2    | LOC389053 | LOC644733 |
| DLX5          | GPR65     | CLASP2   | LOC389072 | LOC644814 |
| DMPK          | GPRASP1   | CLCN2    | LOC389791 | LOC644884 |
| DMRT1         | GRAP2     | CLDN11   | LOC391359 | LOC645304 |
| DMRT2         | GRASP     | CLDN19   | LOC391817 | LOC645411 |
| DMXL2         | GSTM5     | CLDN20   | LOC392145 | LOC645434 |
| DNAH14        | GTSF1     | CLEC11A  | LOC392197 | LOC645520 |
| DNAH2         | GUCY2E    | CLEC2B   | LOC399940 | LOC645558 |
| DNAJC18       | GYPA      | CLEC4A   | LOC400707 | LOC645659 |
| DNHL1         | GYPB      | CLIC3    | LOC400759 | LOC645676 |
| DOK5          | GYPE      | CLIP3    | LOC401233 | LOC645863 |
| DOK6          | GZMA      | CLSTN3   | LOC401317 | LOC646038 |
| DPEP1         | GZMK      | CNFN     | LOC401398 | LOC646348 |
| DPP10         | HBA1      | CNGB1    | LOC401934 | LOC646585 |
| DPPA2         | HBB       | CNRIP1   | LOC402571 | LOC646609 |
| DPPA3         | HBBP1     | CNTFR    | LOC440014 | LOC646804 |
| DPRXP4        | HBD       | CNTNAP1  | LOC440268 | LOC646817 |
| DPYSL4        | HBE1      | CNTROB   | LOC440551 | LOC646990 |
| DQX1          | HBG1      | COCH     | LOC440925 | LOC647060 |
| DRD1IP        | HBM       | COL12A1  | LOC441282 | LOC647195 |
| DSC1          | HBS1L     | COL17A1  | LOC442519 | LOC647971 |
| DSCR1L1       | HBZ       | COL20A1  | LOC541472 | LOC648600 |
| DSCR4         | HDC       | COL2A1   | LOC641741 | LOC648732 |
| DSCR6         | HELB      | COL4A5   | LOC641772 | LOC648931 |
| DTNB          | HEMGN     | COLEC12  | LOC641788 | LOC649346 |
| DTX3          | HEPACAM2  | CPXM1    | LOC641806 | LOC650628 |
| DUOX1         | HHIP      | CPXM2    | LOC641975 | LOC650683 |
| DUOX2         | HIST1H1D  | CPZ      | LOC642003 | LOC650840 |
| DUOXA2        | HIST1H2AM | CRHBP    | LOC642628 | LOC651556 |
| DUSP5P        | HIST1H2BO | CRISP2   | LOC642656 | LOC652094 |
| DUX4          | HIST1H3G  | CRISPLD2 | LOC642749 | LOC652838 |
| DVL1          | HIVEP3    | CRNKL1   | LOC642889 | LOC653105 |
| DYNC111       | HK3       | CRSP2    | LOC642916 | LOC653110 |
| DYNLRB2       | HLA-DQA1  | CRYGS    | LOC642935 | LOC653199 |
| EDA2R         | HMGB3L1   | CSF3R    | LOC642968 | LOC653652 |
| EFCAB3        | HOXA5     | CTF1     | LOC642969 | LOC653696 |
| EFHA2         | HOXA9     | CTGLF1   | LOC643897 | LOC654002 |
| EFHB          | HOXD3     | CTNND2   | LOC643959 | LOC654069 |
| EFS           | HRC       | CTSE     | LOC644012 | LOC727735 |
| EGF           | HSFYP1    | CTSK     | LOC644126 | LOC727848 |
| EIF4E1B       | HSPA12B   | CTSL2    | LOC644186 | LOC727914 |
| ELMOD1        | HSPB2     | CUL7     | LOC644343 | LOC728034 |
| ELOVL3        | HSPB6     | CXCL14   | LOC644500 | LOC728291 |
| ELOVL7        | HTR7      | CXorf45  | LOC644589 | LOC728802 |
| EMID2         | IFI44L    | CYB5RL   | LOC644641 | LOC728830 |
| EMX1          | IFIT1L    | CYorf15B | LOC644686 | LOC728832 |

|          |          |                |           |            |
|----------|----------|----------------|-----------|------------|
| EMX2     | IFNA21   | CYP19A1        | LOC644689 | LOC728889  |
| ENOX1    | IGLL1    | CYP27C1        | LOC645098 | LOC729057  |
| EPC2     | IGLL3    | CYP2S1         | LOC645218 | LOC729669  |
| EPHB1    | IGSF6    | CYP4X1         | LOC645312 | LOC729837  |
| EPHB2    | IKZF1    | CYTSB          | LOC645522 | LOC729954  |
| EPHB3    | IL10RA   | CYYR1          | LOC645848 | LOC730392  |
| EPN3     | IL13RA2  | D4S234E        | LOC646109 | LOC730809  |
| EPS8L1   | IL1RAPL1 | DACH1          | LOC646272 | LOC732419  |
| ERC2     | IL20     | DACT1          | LOC646276 | LOC93349   |
| ERCC6    | IL2RB    | DACT3          | LOC646372 | LONRF2     |
| ERP44    | IL33     | DAGLA          | LOC646458 | LOX        |
| ETAA1    | IL3RA    | DCDC2          | LOC646482 | LRRC16     |
| EXPH5    | IL7R     | DCHS1          | LOC646561 | LRRC16A    |
| EYA1     | IL8RB    | DCLK1          | LOC646743 | LRRC23     |
| FALZ     | IL8RBP   | DCLK3          | LOC646813 | MAB21L2    |
| FAM123A  | IMMP1L   | DCLRE1B        | LOC646908 | MAP3K9     |
| FAM126A  | IQCA1    | DCUN1D2        | LOC646982 | MAP7D3     |
| FAM135A  | IRAK3    | DDX11          | LOC647102 | MAPK4      |
| FAM181B  | ITGA2B   | DDX26B         | LOC647121 | MAPK8IP1   |
| FAM183A  | ITGAD    | DENND2A        | LOC647229 | MDS1       |
| FAM21A   | ITGB3    | DEPDC1         | LOC647328 | MED13      |
| FAM23B   | ITLN1    | DEPDC1B        | LOC647509 | MESDC1     |
| FAM55C   | KCNH2    | DGKA           | LOC647704 | MGC102966  |
| FAM63B   | KCNIP1   | DHDH           | LOC647854 | MGC57359   |
| FAM70A   | KCNK17   | DHFR           | LOC647910 | MICALL1    |
| FAM80B   | KCNMB1   | DIAPH3         | LOC647920 | MIR604     |
| FAM82B   | KCNU1    | DIO3           | LOC647965 | MIR98      |
| FAM83B   | KDM2B    | DIO3OS         | LOC648025 | MIRLET7D   |
| FAM90A6P | KIAA0748 | DKFZp451M2119  | LOC648174 | MLLT4      |
| FBXL14   | KIAA1644 | DKFZp686E2433  | LOC648517 | MNX1       |
| FBXL16   | KIF6     | DKFZp686I15217 | LOC648691 | MSX1       |
| FBXL21   | KIR2DS5  | DLC1           | LOC648749 | MUC4       |
| FBXO10   | KIR3DL1  | DLG3           | LOC648874 | NBPF11     |
| FBXO36   | KIR3DL2  | DLG4           | LOC648993 | NCRNA00173 |
| FDXR     | KLF1     | DLGAP5         | LOC649071 | NEB        |
| FERMT1   | KLRB1    | DLK1           | LOC649160 | NEIL1      |
| FGD4     | KRT1     | DLL1           | LOC649238 | NFKBID     |
| FGF11    | KRT13    | DLX3           | LOC649305 | NNMT       |
| FGF13    | KRT6C    | DMD            | LOC649431 | NOL3       |
| FKBP10   | LAG3     | DNAJA4         | LOC649495 | NPAS1      |
| FLJ10088 | LAMA4    | DNASE1         | LOC649503 | NPPB       |
| FLJ11292 | LAT      | DNHD1          | LOC649540 | NPR1       |
| FLJ12684 | LCE1E    | DNMT3B         | LOC649853 | NR4A2      |
| FLJ13305 | LCP2     | DOCK11         | LOC649859 | NR6A1      |
| FLJ14166 | LDHAL6A  | DOCK8          | LOC650280 | NRF1       |
| FLJ14712 | LEFTY1   | DOPEY1         | LOC650889 | NRG1       |
| FLJ16779 | LGALS12  | DPPA4          | LOC651075 | NTN1       |
| FLJ22536 | LGALS14  | DPY19L2P2      | LOC651112 | OLFM2      |
| FLJ22675 | LGALS9   | DPYSL3         | LOC651123 | OR52N5     |
| FLJ23152 | LHX2     | DSC3           | LOC651285 | OTP        |
| FLJ25006 | LILRA2   | DSCR10         | LOC651986 | OXCT2      |
| FLJ27354 | LILRA3   | DTL            | LOC651987 | P2RY2      |
| FLJ30428 | LILRA5   | DUSP9          | LOC652164 | PARD6A     |
| FLJ31568 | LILRA6   | DZIP3          | LOC652175 | PARD6B     |
| FLJ32810 | LILRB2   | E2F2           | LOC652185 | PBXIP1     |
| FLJ35258 | LILRB4   | E2F7           | LOC652456 | PDE4DIP    |

|          |              |         |           |           |
|----------|--------------|---------|-----------|-----------|
| FLJ35429 | LILRB5       | EBI3    | LOC652704 | PELI2     |
| FLJ35767 | LOC100127887 | EDNRA   | LOC652712 | PER1      |
| FLJ35776 | LOC100127937 | EDNRB   | LOC652768 | PGGT1B    |
| FLJ37078 | LOC100127952 | EFEMP1  | LOC653082 | PHLDA2    |
| FLJ37644 | LOC100127974 | EFNB2   | LOC653113 | PHLDA3    |
| FLJ38773 | LOC100128090 | EFNB3   | LOC653321 | PHLDB3    |
| FLJ41327 | LOC100128186 | EGFL6   | LOC653342 | PJCG6     |
| FLJ41941 | LOC100128292 | EGFLAM  | LOC653423 | PKIB      |
| FLJ42957 | LOC100128370 | EHD3    | LOC653513 | PLAUR     |
| FLJ44313 | LOC100128374 | EHMT1   | LOC653515 | PLCH2     |
| FLJ45983 | LOC100128476 | ELOVL4  | LOC653520 | PLEKHA3   |
| FLJ46838 | LOC100128640 | ELP2P   | LOC653567 | PLSCR1    |
| FN1      | LOC100128691 | EME1    | LOC653650 | PMS2L1    |
| FOXD1    | LOC100128881 | EMID1   | LOC653857 | POLH      |
| FOXF1    | LOC100129119 | EMILIN2 | LOC654433 | POT1      |
| FOXI3    | LOC100129411 | EML1    | LOC727751 | POU5F1P1  |
| FOXL2    | LOC100129532 | EMR2    | LOC728160 | PPM1E     |
| FOXR1    | LOC100129602 | ENDOD1  | LOC728285 | PPP1R3B   |
| FREM2    | LOC100129751 | ENG     | LOC728505 | PPP4R1L   |
| FRMD3    | LOC100129878 | ENO2    | LOC728558 | PQLC2     |
| FRMD7    | LOC100130441 | ENPP2   | LOC728671 | PRB3      |
| FSBP     | LOC100130492 | ENPP5   | LOC729179 | PRODH     |
| FUT1     | LOC100130679 | ENTPD1  | LOC729231 | PRR4      |
| FUT10    | LOC100130828 | EOMES   | LOC729252 | PSCA      |
| FZD3     | LOC100130855 | EPB41L3 | LOC729350 | PSD       |
| GABBR1   | LOC100130938 | EPHA4   | LOC729562 | PSG5      |
| GABBR2   | LOC100131164 | EPR1    | LOC729706 | PTGS2     |
| GABRB1   | LOC100131283 | ERAP1   | LOC730041 | PTK9      |
| GABRG2   | LOC100131335 | ERBB2IP | LOC730045 | PTPN21    |
| GABRP    | LOC100131391 | ERCC6L  | LOC730058 | PWWP2     |
| GAGE12E  | LOC100131426 | ERP27   | LOC730077 | PYROXD1   |
| GAGE4    | LOC100131726 | ERVWE1  | LOC730100 | PZP       |
| GALIG    | LOC100131856 | ESRRG   | LOC730357 | RAB11FIP4 |
| GALNTL1  | LOC100131871 | ETV2    | LOC730360 | RAB27A    |
| GAS7     | LOC100131892 | ETV3    | LOC730908 | RAB30     |
| GATA2    | LOC100131982 | ETV4    | LOC731002 | RAPSN     |
| GATA3    | LOC100132146 | EVC     | LOC732300 | RBM24     |
| GCC2     | LOC100132167 | EVI1    | LOC732432 | RBMS2P    |
| GDF3     | LOC100132707 | EVI2A   | LOC93432  | REL       |
| GDF5OS   | LOC100132810 | EXO1    | LOC96610  | RELB      |
| GDF6     | LOC100132973 | EXOD1   | LPIN3     | REPS1     |
| GEFT     | LOC100133263 | EZH1    | LRRC2     | REV3L     |
| GFPT2    | LOC100133315 | FABP7   | LRRC50    | RGAG4     |
| GGT7     | LOC100133401 | FAM101A | LUZP2     | RGMB      |
| GINS1    | LOC100133545 | FAM123B | MAGEA9B   | RHOF      |
| GJA3     | LOC100133678 | FAM129A | MAK       | RIMS4     |
| GJB6     | LOC100133771 | FAM161A | MANEAL    | RIN1      |
| GJB7     | LOC100134067 | FAM162B | MAP6      | RND1      |
| GJC3     | LOC100134102 | FAM164A | MAPT      | RNF111    |
| GLB1L2   | LOC100134172 | FAM19A4 | MARK4     | RNF152    |
| GLCCI1   | LOC100134229 | FAM22D  | MCC       | RNF217    |
| GLDN     | LOC100134348 | FAM3B   | MDM4      | RNU4ATAC  |
| GNB3     | LOC100134766 | FAM49A  | MEF2B     | RNY5      |
| GNG8     | LOC100192378 | FAM54A  | MESDC2    | RP2       |
| GNGT1    | LOC127099    | FAM64A  | MESP1     | RPL32P3   |
| GOLGA6B  | LOC138652    | FAM65B  | MFI2      | RPPH1     |

|          |           |          |          |          |
|----------|-----------|----------|----------|----------|
| GOLGA8E  | LOC142937 | FAM70B   | MFSD2    | RPTOR    |
| GPATCH8  | LOC153684 | FAM72A   | MGC12982 | RRAD     |
| GPD2     | LOC200493 | FAM72D   | MGC26733 | RRP1     |
| GPR114   | LOC201651 | FAM90A2P | MGC40170 | RTN2     |
| GPR160   | LOC283683 | FANCB    | MGC48637 | RTN4R    |
| GPR161   | LOC284352 | FANCD2   | MICA     | SCAF1    |
| GPR3     | LOC285033 | FANCI    | MIR1277  | SCRN3    |
| GPR61    | LOC285205 | FAR1     | MIR1282  | SDR39U1  |
| GPR84    | LOC285453 | FAR2     | MIR193A  | SENP3    |
| GPR87    | LOC340113 | FAT3     | MIR219-2 | SERF1A   |
| GRAMD1B  | LOC388938 | FBLN1    | MIR302C  | SERPINB9 |
| GRAMD2   | LOC389857 | FBLN2    | MIR561   | SFN      |
| GRHL2    | LOC390594 | FBN2     | MIR564   | SFRS13B  |
| GRHL3    | LOC391727 | FBN3     | MKX      | SFTPD    |
| GRIN3B   | LOC400236 | FBXL2    | MMP10    | SFXN3    |
| GRPR     | LOC400958 | FBXL7    | MMP25    | SH2D3A   |
| GSK3A    | LOC401056 | FBXO15   | MMP3     | SHD      |
| GTPBP5   | LOC401286 | FBXO45   | MMP7     | SHROOM1  |
| GUCA1A   | LOC440421 | FBXO9    | MOCS3    | SLC16A3  |
| GUCA1B   | LOC440570 | FCGBP    | MOGAT1   | SLC1A1   |
| GUCY2C   | LOC440900 | FER      | MOGAT2   | SLC27A6  |
| GULP1    | LOC441007 | FER1L3   | MPP3     | SLC35F2  |
| HAND1    | LOC441018 | FGD1     | MPPED1   | SLC38A11 |
| HAPLN1   | LOC441081 | FGD3     | MST1R    | SLC39A13 |
| HAPLN2   | LOC441212 | FGD5     | MT1JP    | SLC41A2  |
| HAPLN3   | LOC441511 | FHDC1    | MT3      | SLC7A4   |
| HAS2     | LOC441554 | FHOD1    | MUC2     | SMPD4    |
| HAS2AS   | LOC442366 | FHOD3    | MUC20    | SMPDL3B  |
| HAUS6    | LOC541471 | FIBCD1   | MUCL1    | SNORA64  |
| HDX      | LOC606724 | FIGN     | MYH1     | SNORA71A |
| HEPH     | LOC641705 | FIGNL1   | NAT2     | SNORD12C |
| HERV-FRD | LOC642073 | FILIP1   | NBPF15   | SNORD38A |
| HESX1    | LOC642113 | FKBPL    | NDUFA4L2 | SNORD69  |
| HEXA     | LOC642154 | FLJ10246 | NECAB2   | SNX12    |
| HMGA2    | LOC642342 | FLJ11235 | NEFL     | SOAT1    |
| HOMER1   | LOC642553 | FLJ11783 | NEK10    | SPAG1    |
| HOXB3    | LOC642580 | FLJ12078 | NETO1    | SPAG4    |
| HOXB4    | LOC642621 | FLJ13197 | NKX2-2   | SPRYD5   |
| HOXB7    | LOC642707 | FLJ14107 | NOD2     | SRCRB4D  |
| HOXB8    | LOC642773 | FLJ14213 | NOM1     | SRRM5    |
| HOXC4    | LOC642843 | FLJ20209 | NOS2     | SSTR1    |
| HOXC8    | LOC642933 | FLJ22639 | NOS2A    | ST14     |
| HRASLS   | LOC642943 | FLJ32011 | NPAS2    | ST7OT1   |
| HRK      | LOC642960 | FLJ33996 | NPTX2    | STC2     |
| HS3ST1   | LOC643256 | FLJ34047 | NRG4     | STRC     |
| HS6ST1   | LOC643403 | FLJ35934 | NUDT4    | STX17    |
| HSD3B1   | LOC643432 | FLJ37453 | NXPH4    | SUSD2    |
| HSF1     | LOC643461 | FLJ39653 | OASL     | SUSD5    |
| HSF2BP   | LOC643505 | FLJ39660 | ODF4     | SYN2     |
| HSN2     | LOC643570 | FLJ44342 | OLA1     | TAC1     |
| HSPB7    | LOC643713 | FLJ45337 | OR10J1   | TAP2     |
| HSPG2    | LOC643731 | FLJ45513 | OR1B1    | TBC1D3C  |
| HTR2C    | LOC643733 | FLJ90757 | OR1S2    | TCF7L2   |
| HTRA4    | LOC643792 | FLRT2    | OR2T11   | TES      |
| IAPP     | LOC643815 | FLVCR1   | OR4M1    | THRSP    |
| ID4      | LOC643998 | FLYWCH1  | OR51S1   | THSD4    |



|           |           |         |             |           |
|-----------|-----------|---------|-------------|-----------|
| IFNE      | LOC644113 | FMNL1   | OVCA2       | TIGIT     |
| IFT140    | LOC644399 | FMNL2   | PALM2       | TMEM100   |
| IGF1R     | LOC644573 | FMOD    | PAX8        | TMEM104   |
| IGSF5     | LOC644580 | FOX E3  | PAX9        | TMEM132A  |
| IGSF9     | LOC644596 | FOX H1  | PCDHA11     | TMEM154   |
| IKZF4     | LOC644620 | FOX K2  | PCK1        | TMEM164   |
| IL20RA    | LOC644624 | FOX M1  | PDF         | TMEM171   |
| IL6       | LOC644830 | FRAS1   | PDZK1IP1    | TMEM191C  |
| INA       | LOC645010 | FREM1   | PIGR        | TMEM22    |
| INHA      | LOC645038 | FRMD4A  | PIP5KL1     | TMEM38A   |
| INMT      | LOC645183 | FRMPD3  | PLK3        | TMPRSS2   |
| INSC      | LOC645203 | FRZB    | PNPLA3      | TNFRSF10A |
| INSL4     | LOC645508 | FSD1    | PNRC1       | TNFRSF10C |
| INSR      | LOC645563 | FUT8    | PPAN-P2RY11 | TNNT2     |
| INTU      | LOC645661 | FX YD6  | PPFIA3      | TRAF1     |
| IRX2      | LOC645722 | FYB     | PPP1R3A     | TRAF3     |
| IRX4      | LOC645732 | FZD2    | PRR8        | TRAF3IP1  |
| ISL1      | LOC646023 | FZD6    | PRSS2       | TRIM22    |
| ISM2      | LOC646049 | GAB1    | PSMA7       | TRIM36    |
| ITGA10    | LOC646223 | GAGE2B  | PTGER1      | TRIM43    |
| ITGA8     | LOC646300 | GAL3ST4 | PTGFR       | TRK1      |
| ITGB1BP3  | LOC646345 | GALNT10 | PTH2R       | TSLP      |
| ITGB4     | LOC646509 | GALNT12 | PTK6        | TSN       |
| ITGB6     | LOC646521 | GALNT6  | PTPRT       | TTY14     |
| ITLN2     | LOC646562 | GAS1    | PUS10       | UBQLN3    |
| JPH1      | LOC646734 | GAS2L1  | PXDNL       | UEVLD     |
| JPH3      | LOC646795 | GATA5   | RANBP3L     | UGT3A1    |
| JRK       | LOC646853 | GBGT1   | RAPGEF4     | ULK4      |
| KAL1      | LOC647135 | GCNT1   | RDH12       | USMG5     |
| KBTBD10   | LOC647234 | GDPD3   | RELL2       | USP35     |
| KC6       | LOC647251 | GFER    | RELT        | USP43     |
| KCNA5     | LOC647506 | GFRA2   | RIG         | VLDLR     |
| KCNAB2    | LOC647543 | GGTLC1  | RNF125      | WDR47     |
| KCND1     | LOC647570 | GIN1    | RNF148      | WNT3      |
| KCNG1     | LOC647579 | GIN52   | RNF168      | WNT5A     |
| KCNH8     | LOC647592 | GIN54   | RNPC2       | YKT6      |
| KCNJ13    | LOC647742 | GJA1    | RSHL3       | ZBTB8A    |
| KCNJ14    | LOC647747 | GJA5    | RTP4        | ZNF222    |
| KCNK10    | LOC647855 | GJC2    | RUNDC2A     | ZNF24     |
| KCNK12    | LOC647911 | GK5     | SAA1        | ZNF251    |
| KCNK7     | LOC647947 | GLI3    | SAA2        | ZNF470    |
| KCNK9     | LOC648364 | GLIPR2  | SALL1       | ZNF48     |
| KCNQ4     | LOC648470 | GLRB    | SDS         | ZNF555    |
| KCNS1     | LOC648615 | GLT8D2  | SEC14L2     | ZNF628    |
| KCTD1     | LOC648657 | GLUD2   | SGK2        | ZNF679    |
| KDM4D     | LOC649023 | gm127   | SGMS2       | ZNF774    |
| KHDC1     | LOC649120 | GMEB1   | SH3BP2      | ZXDB      |
| KIAA0226  | LOC649397 | GNB4    | SIGLEC15    |           |
| KIAA0514  | LOC649443 | GNG2    | SLC18A1     |           |
| KIAA1024  | LOC649580 | GNG4    | SLC22A10    |           |
| KIAA1045  | LOC649723 | GNGT2   | SLC22A6     |           |
| KIAA1199  | LOC649978 | GOLGA7B | SLC24A5     |           |
| KIAA1202  | LOC650132 | GOLGA8A | SLC25A24    |           |
| KIAA1244  | LOC650494 | GOLGA9P | SLC25A30    |           |
| KIAA1324L | LOC650566 | GP6     | SLC25A33    |           |
| KIAA1407  | LOC650677 | GPA33   | SLC26A8     |           |

|              |           |             |          |  |
|--------------|-----------|-------------|----------|--|
| KIAA1549     | LOC650831 | GPATCH1     | SLC28A1  |  |
| KIAA1571     | LOC650950 | GPBAR1      | SLC35D1  |  |
| KIAA1666     | LOC651212 | GPC3        | SLC45A2  |  |
| KIAA1772     | LOC651635 | GPC4        | SLC6A13  |  |
| KIF16B       | LOC651695 | GPC5        | SLC6A7   |  |
| KIF26B       | LOC651738 | GPM6B       | SLC9A3R2 |  |
| KIF27        | LOC651751 | GPR124      | SLCO5A1  |  |
| KIF3C        | LOC651886 | GPR137C     | SLED1    |  |
| KLC2         | LOC651959 | GPR156      | SLPI     |  |
| KLC3         | LOC652140 | GPSM2       | SMCR7    |  |
| KLF8         | LOC652195 | GPSM3       | SMCR8    |  |
| KLHL17       | LOC652255 | GRK4        | SNORA11C |  |
| KLHL23       | LOC652437 | GSG2        | SNORA13  |  |
| KLK3         | LOC652479 | GSTCD       | SNORA21  |  |
| KLK6         | LOC652491 | GSTT1       | SNORA3   |  |
| KLK7         | LOC652493 | GUCY1A3     | SNORA52  |  |
| KLK8         | LOC652566 | GVIN1       | SNORA63  |  |
| KLRA1        | LOC652657 | GYLTL1B     | SNORA75  |  |
| KLRG2        | LOC652679 | GYS1        | SNORD10  |  |
| KRBA2        | LOC652850 | HAND2       | SNORD12  |  |
| KREMEN2      | LOC653303 | HAUS5       | SNORD14B |  |
| KRT17        | LOC653319 | HBA2        | SNORD15B |  |
| KRT17P3      | LOC653337 | HBG2        | SNORD33  |  |
| KRT23        | LOC653600 | HBQ1        | SNORD34  |  |
| KRTAP19-6    | LOC653680 | HCG27       | SNORD48  |  |
| KRTAP21-1    | LOC653765 | HCN3        | SNORD55  |  |
| KRTAP21-2    | LOC653895 | HDAC7       | SORCS2   |  |
| KRTAP6-3     | LOC653907 | HDGFRP3     | SPATA3   |  |
| KRTDAP       | LOC654203 | HECW2       | SPRR1B   |  |
| KSR1         | LOC654264 | HELQ        | SPTBN5   |  |
| L1CAM        | LOC727796 | HEYL        | SRD5A2   |  |
| L1TD1        | LOC728081 | HIF3A       | SULT1B1  |  |
| LAMA1        | LOC728351 | HIST1H2AG   | SULT2B1  |  |
| LAMB2L       | LOC728608 | HIST1H2BH   | SULT6B1  |  |
| LASS1        | LOC728806 | HIST1H4E    | SUSD4    |  |
| LAYN         | LOC728946 | HJURP       | SYPL2    |  |
| LCN15        | LOC729088 | HKR1        | SYT9     |  |
| LCORL        | LOC729533 | HLA-DOA     | TAF13    |  |
| LDLRAD3      | LOC729623 | HLA-DPA1    | TAS2R43  |  |
| LECT1        | LOC729792 | HMHA1       | TBX15    |  |
| LEMD1        | LOC729799 | HMMR        | TEC      |  |
| LGALS13      | LOC729870 | HOMER3      | TGFA     |  |
| LGI2         | LOC729957 | HOM-TES-103 | TGS1     |  |
| LGR6         | LOC729995 | HOPX        | THEM5    |  |
| LIMK1        | LOC730063 | HOXA2       | TLR1     |  |
| LIMK2        | LOC730240 | HOXB2       | TLR3     |  |
| LIN28        | LOC730378 | HPDL        | TMEM184A |  |
| LINGO2       | LOC730385 | HPSE        | TMEM45B  |  |
| LMBR1L       | LOC730474 | HS6ST2      | TMEM52   |  |
| LMF1         | LOC730668 | HSD17B1     | TNFAIP2  |  |
| LMO1         | LOC730919 | HSPA12A     | TNFRSF9  |  |
| LMOD1        | LOC730996 | HTR2A       | TP53AIP1 |  |
| LNX1         | LOC731444 | HVCN1       | TPSG1    |  |
| LOC100127915 | LOC731486 | IDO1        | TREH     |  |
| LOC100127925 | LOC732111 | IFT172      | TRIM16L  |  |
| LOC100128260 | LOC732138 | IFT80       | TRIM31   |  |

|              |           |          |              |  |
|--------------|-----------|----------|--------------|--|
| LOC100128265 | LOC732316 | IGDCC3   | TRIM6-TRIM34 |  |
| LOC100128477 | LOC92017  | IGDCC4   | TRPM8        |  |
| LOC100128516 | LPAR4     | IGF2AS   | TRQ1         |  |
| LOC100128591 | LRAT      | IGF2BP1  | TRR1         |  |
| LOC100128653 | LRIG3     | IGF2BP3  | TSSK2        |  |
| LOC100128688 | LRRC17    | IGFBP5   | TTC21A       |  |
| LOC100128765 | LRRC19    | IGFL3    | TTC28        |  |
| LOC100128857 | LRRC26    | IGSF1    | TTC36        |  |
| LOC100128908 | LRRC33    | IHH      | TTC9         |  |
| LOC100129148 | LRRK1     | IKBKE    | TTY6         |  |
| LOC100129293 | LRRN3     | IL11     | TUBA4        |  |
| LOC100129296 | LST1      | IL17C    | UFSP1        |  |
| LOC100129343 | LY6G5C    | IL17D    | UGT1A1       |  |
| LOC100129361 | LY6G6D    | ILDR1    | UGT1A10      |  |
| LOC100129365 | LY6G6F    | IMPACT   | UGT1A4       |  |
| LOC100129387 | LY86      | INCENP   | UGT1A6       |  |
| LOC100129466 | LY9       | INPP5D   | UGT1A7       |  |
| LOC100129503 | LYVE1     | INSL5    | UGT1A9       |  |
| LOC100129534 | LYZL1     | IP6K3    | USP2         |  |
| LOC100129541 | M160      | IPW      | VSIG2        |  |
| LOC100129588 | MAG       | IQGAP3   | VTRNA1-1     |  |
| LOC100129652 | MAGEA12   | IRAK1BP1 | WIPF2        |  |
| LOC100129674 | MAGEA2    | IRAK4    | WNT8A        |  |
| LOC100129677 | MAP2K6    | IRX6     | XPOT         |  |
| LOC100129707 | MARCO     | ITGA3    | ZCCHC16      |  |
| LOC100129744 | MAZ       | ITGA9    | ZNF414       |  |
| LOC100129808 | MCCD1     | ITGAM    | ZNF460       |  |
| LOC100129979 | MEF2C     | ITM2A    | ZNF496       |  |
| LOC100130009 | MFNG      | ITPKB    | ZNF57        |  |
| LOC100130010 | MFSD7     | ITPR1    | ZNF597       |  |
| LOC100130224 | MGAT5B    | JAK2     | ZNF664       |  |
| LOC100130255 | MGC13168  | JAM2     | ZNF778       |  |
| LOC100130298 | MGC5139   | JAM3     | ZNF98        |  |
| LOC100130387 | MIA2      | JHDM1D   | ZXDA         |  |
| LOC100130518 | MICAL2    | JMJD2C   |              |  |
| LOC100130663 | MICALCL   | JMJD5    |              |  |
| LOC100130798 | MIMT1     | KAZALD1  |              |  |
| LOC100130840 | MIR1281   | KBTBD6   |              |  |
| LOC100130921 | MIR144    | KCNAB1   |              |  |
| LOC100130967 | MIR182    | KCNE1L   |              |  |
| LOC100131031 | MIR1976   | KCNJ16   |              |  |
| LOC100131128 | MIR365-1  | KCNJ2    |              |  |
| LOC100131138 | MIR593    | KCNK13   |              |  |
| LOC100131165 | MMRN1     | KCNMB4   |              |  |
| LOC100131210 | MNDA      | KCTD15   |              |  |
| LOC100131289 | MPO       | KCTD7    |              |  |
| LOC100131311 | MRM1      | KDR      |              |  |
| LOC100131326 | MRPL42P5  | KEL      |              |  |
| LOC100131330 | MS4A3     | KIAA0040 |              |  |
| LOC100131473 | MS4A4A    | KIAA0082 |              |  |
| LOC100131578 | MS4A7     | KIAA0363 |              |  |
| LOC100131621 | MSLNL     | KIAA0367 |              |  |
| LOC100131644 | MSR1      | KIAA0460 |              |  |
| LOC100131707 | MT1B      | KIAA0773 |              |  |
| LOC100131716 | MX2       | KIAA1107 |              |  |
| LOC100131722 | MYH11     | KIAA1211 |              |  |

|              |          |              |  |  |
|--------------|----------|--------------|--|--|
| LOC100131930 | MYO16    | KIAA1333     |  |  |
| LOC100131967 | MYO1F    | KIAA1467     |  |  |
| LOC100132060 | MYO1G    | KIAA1524     |  |  |
| LOC100132153 | MYT1     | KIAA1641     |  |  |
| LOC100132292 | NAALADL1 | KIAA1797     |  |  |
| LOC100132395 | NAPSA    | KIAA1908     |  |  |
| LOC100132413 | NAPSB    | KIF11        |  |  |
| LOC100132428 | NCF1C    | KIF14        |  |  |
| LOC100132456 | NCF2     | KIF15        |  |  |
| LOC100132549 | NCKAP1L  | KIF18A       |  |  |
| LOC100132640 | NDUFB4   | KIF20A       |  |  |
| LOC100132678 | NGFR     | KIF23        |  |  |
| LOC100132724 | NHLRC4   | KIF24        |  |  |
| LOC100132794 | NID1     | KIF26A       |  |  |
| LOC100132920 | NKG7     | KIF2C        |  |  |
| LOC100132942 | NNAT     | KIF4A        |  |  |
| LOC100132960 | NOTCH4   | KIF5C        |  |  |
| LOC100133070 | NR2F1    | KIF7         |  |  |
| LOC100133099 | NRG3     | KIFC1        |  |  |
| LOC100133118 | NRXN2    | KIFC3        |  |  |
| LOC100133144 | NTM      | KIT          |  |  |
| LOC100133172 | NTSR1    | KITLG        |  |  |
| LOC100133234 | OGN      | KLHDC10      |  |  |
| LOC100133422 | OIT3     | KLK11        |  |  |
| LOC100133430 | OLFM1    | KNTC1        |  |  |
| LOC100133459 | OLFM4    | KRI1         |  |  |
| LOC100133503 | OR13C4   | L3MBTL       |  |  |
| LOC100133554 | OR4S1    | LAMA2        |  |  |
| LOC100133555 | OR52B6   | LAMC3        |  |  |
| LOC100133558 | OR5K4    | LAT1-3TM     |  |  |
| LOC100133627 | P2RX1    | LDOC1        |  |  |
| LOC100133747 | P2RY13   | LEF1         |  |  |
| LOC100133760 | P2RY8    | LEFTY2       |  |  |
| LOC100133981 | PACAP    | LEPREL1      |  |  |
| LOC100134002 | PADI4    | LEPREL2      |  |  |
| LOC100134035 | PAQR5    | LGALS2       |  |  |
| LOC100134073 | PARVG    | LGR4         |  |  |
| LOC100134101 | PCDH12   | LHB          |  |  |
| LOC100134160 | PCDH9    | LIFR         |  |  |
| LOC100134259 | PCDHB14  | LIN28B       |  |  |
| LOC100134368 | PDE1A    | LIN7B        |  |  |
| LOC100134396 | PDE2A    | LIN9         |  |  |
| LOC100134412 | PDE4B    | LINGO1       |  |  |
| LOC100134466 | PDE6G    | LMNB1        |  |  |
| LOC100134474 | PF4V1    | LMO2         |  |  |
| LOC100134498 | PGA3     | LOC100127971 |  |  |
| LOC100134528 | PGA5     | LOC100127983 |  |  |
| LOC100134539 | PGLYRP1  | LOC100127999 |  |  |
| LOC100134550 | PHOSPHO1 | LOC100128139 |  |  |
| LOC100134587 | PI16     | LOC100128191 |  |  |
| LOC100134660 | PKD2L1   | LOC100128230 |  |  |
| LOC100134700 | PLCB2    | LOC100128252 |  |  |
| LOC100144604 | PLD4     | LOC100128398 |  |  |
| LOC100188949 | PLEKHH2  | LOC100128675 |  |  |
| LOC100192379 | PLGLA    | LOC100128729 |  |  |
| LOC119358    | PLIN     | LOC100128737 |  |  |

|           |          |              |  |  |
|-----------|----------|--------------|--|--|
| LOC124216 | PLVAP    | LOC100128888 |  |  |
| LOC133993 | PNMT     | LOC100128974 |  |  |
| LOC134505 | POU2AF1  | LOC100129064 |  |  |
| LOC144481 | POU2F3   | LOC100129095 |  |  |
| LOC146439 | PPAPDC1A | LOC100129129 |  |  |
| LOC147645 | PPP1R14D | LOC100129144 |  |  |
| LOC148137 | PPP1R16B | LOC100129149 |  |  |
| LOC151300 | PRAM1    | LOC100129195 |  |  |
| LOC151457 | PRKCB    | LOC100129410 |  |  |
| LOC154761 | PRKCB1   | LOC100129540 |  |  |
| LOC155100 | PRND     | LOC100129571 |  |  |
| LOC158572 | PRO0132  | LOC100129580 |  |  |
| LOC162073 | PRPS1L1  | LOC100129636 |  |  |
| LOC169834 | PRR12    | LOC100129637 |  |  |
| LOC199800 | PRSS21   | LOC100129708 |  |  |
| LOC220729 | PRSSL1   | LOC100129905 |  |  |
| LOC283332 | PSCD4    | LOC100129977 |  |  |
| LOC283588 | PTAFR    | LOC100129988 |  |  |
| LOC283767 | PTCRA    | LOC100130123 |  |  |
| LOC283874 | PTGS1    | LOC100130217 |  |  |
| LOC284296 | PTPRB    | LOC100130229 |  |  |
| LOC284297 | PTPRCAP  | LOC100130367 |  |  |
| LOC284620 | PTPRN2   | LOC100130413 |  |  |
| LOC285047 | PTPRO    | LOC100130458 |  |  |
| LOC285500 | PVALB    | LOC100130506 |  |  |
| LOC338963 | PYHIN1   | LOC100130555 |  |  |
| LOC339047 | RAB3A    | LOC100130557 |  |  |
| LOC339535 | RAB3C    | LOC100130592 |  |  |
| LOC339799 | RAMP3    | LOC100130776 |  |  |
| LOC340156 | RAP2B    | LOC100130904 |  |  |
| LOC340357 | RASA3    | LOC100130935 |  |  |
| LOC341689 | RASL10A  | LOC100130952 |  |  |
| LOC344595 | RASSF10  | LOC100131139 |  |  |
| LOC344741 | RETN     | LOC100131243 |  |  |
| LOC374443 | RFPL2    | LOC100131253 |  |  |
| LOC387770 | RFPL3    | LOC100131265 |  |  |
| LOC387856 | RFTN2    | LOC100131271 |  |  |
| LOC388436 | RFX2     | LOC100131608 |  |  |
| LOC388458 | RGS18    | LOC100131894 |  |  |
| LOC388494 | RGS6     | LOC100132011 |  |  |
| LOC388559 | RHAG     | LOC100132112 |  |  |
| LOC388565 | RHBG     | LOC100132119 |  |  |
| LOC388692 | RHCE     | LOC100132228 |  |  |
| LOC388820 | RHOH     | LOC100132287 |  |  |
| LOC389118 | RHOJ     | LOC100132439 |  |  |
| LOC389332 | RIPK3    | LOC100132475 |  |  |
| LOC390372 | RNASE2   | LOC100132491 |  |  |
| LOC390414 | RNASE3   | LOC100132565 |  |  |
| LOC391045 | RNF175   | LOC100132901 |  |  |
| LOC392382 | RNY4     | LOC100133076 |  |  |
| LOC392635 | ROBO4    | LOC100133080 |  |  |
| LOC392787 | RSAD2    | LOC100133200 |  |  |
| LOC400214 | RUNDC3A  | LOC100133220 |  |  |
| LOC400743 | S100A12  | LOC100133482 |  |  |
| LOC400831 | S100A8   | LOC100133583 |  |  |
| LOC400955 | SAMD9L   | LOC100133666 |  |  |

|           |            |              |  |  |
|-----------|------------|--------------|--|--|
| LOC401002 | SAMSN1     | LOC100133667 |  |  |
| LOC401007 | SASH3      | LOC100133673 |  |  |
| LOC401237 | SCARNA14   | LOC100133686 |  |  |
| LOC401252 | SCARNA18   | LOC100133737 |  |  |
| LOC401431 | SCGB3A1    | LOC100133744 |  |  |
| LOC401650 | SCN7A      | LOC100133797 |  |  |
| LOC402116 | SDPR       | LOC100134009 |  |  |
| LOC402693 | SEC14L5    | LOC100134052 |  |  |
| LOC404266 | SELL       | LOC100134098 |  |  |
| LOC415056 | SELP       | LOC100134241 |  |  |
| LOC439936 | SEMA4A     | LOC100134261 |  |  |
| LOC440132 | SERPINA13  | LOC100134301 |  |  |
| LOC440459 | SGIP1      | LOC100134444 |  |  |
| LOC440585 | SH2D2A     | LOC100134563 |  |  |
| LOC440864 | SH2D3C     | LOC100134624 |  |  |
| LOC440910 | SH3RF3     | LOC100134688 |  |  |
| LOC440978 | SIGLEC10   | LOC100134703 |  |  |
| LOC441061 | SIGLEC11   | LOC100134711 |  |  |
| LOC441114 | SIGLEC16   | LOC100134734 |  |  |
| LOC441208 | SIGLEC7    | LOC100170939 |  |  |
| LOC441237 | SIT1       | LOC126520    |  |  |
| LOC441294 | SLA2       | LOC148709    |  |  |
| LOC441528 | SLAMF6     | LOC149224    |  |  |
| LOC441737 | SLC10A4    | LOC153561    |  |  |
| LOC442041 | SLC11A1    | LOC202134    |  |  |
| LOC442057 | SLC13A3    | LOC221442    |  |  |
| LOC554207 | SLC17A8    | LOC282997    |  |  |
| LOC641365 | SLC1A7     | LOC283755    |  |  |
| LOC641765 | SLC22A16   | LOC283932    |  |  |
| LOC641801 | SLC25A21   | LOC284023    |  |  |
| LOC641999 | SLC26A1    | LOC284648    |  |  |
| LOC642062 | SLC26A10   | LOC285359    |  |  |
| LOC642097 | SLC26A3    | LOC285908    |  |  |
| LOC642109 | SLC35D3    | LOC285943    |  |  |
| LOC642156 | SLC4A1     | LOC286002    |  |  |
| LOC642267 | SLC5A11    | LOC286135    |  |  |
| LOC642325 | SLC8A3     | LOC286367    |  |  |
| LOC642369 | SLFN13     | LOC338667    |  |  |
| LOC642486 | SLITRK1    | LOC338799    |  |  |
| LOC642570 | SMCP       | LOC339483    |  |  |
| LOC642635 | SNORA65    | LOC346887    |  |  |
| LOC642661 | SNORA78    | LOC387934    |  |  |
| LOC642759 | SNORD114-1 | LOC388312    |  |  |
| LOC642780 | SNORD114-3 | LOC388397    |  |  |
| LOC642787 | SNORD25    | LOC389102    |  |  |
| LOC642809 | SNORD4B    | LOC389465    |  |  |
| LOC642852 | SNX18      | LOC389634    |  |  |
| LOC642980 | SNX31      | LOC389816    |  |  |
| LOC643012 | SNX32      | LOC390705    |  |  |
| LOC643015 | SOS2       | LOC390940    |  |  |
| LOC643018 | SOX12      | LOC391429    |  |  |
| LOC643187 | SOX6       | LOC392843    |  |  |
| LOC643222 | SPAG6      | LOC399829    |  |  |
| LOC643233 | SPATA4     | LOC400464    |  |  |
| LOC643240 | SPESP1     | LOC400879    |  |  |
| LOC643272 | SPI1       | LOC400986    |  |  |

|           |           |           |  |  |
|-----------|-----------|-----------|--|--|
| LOC643293 | SPIB      | LOC401052 |  |  |
| LOC643313 | SPINK2    | LOC401620 |  |  |
| LOC643373 | SPTA1     | LOC401622 |  |  |
| LOC643382 | SPTB      | LOC439949 |  |  |
| LOC643389 | SRD5A3    | LOC440145 |  |  |
| LOC643396 | SRL       | LOC440258 |  |  |
| LOC643401 | SRY       | LOC440836 |  |  |
| LOC643423 | STAB1     | LOC440928 |  |  |
| LOC643451 | STAB2     | LOC441046 |  |  |
| LOC643605 | SUCNR1    | LOC441066 |  |  |
| LOC643647 | SULT1C2   | LOC441193 |  |  |
| LOC643664 | SV2B      | LOC441268 |  |  |
| LOC643841 | SYCP1     | LOC441864 |  |  |
| LOC643981 | TACR3     | LOC441907 |  |  |
| LOC643985 | TAL1      | LOC442075 |  |  |
| LOC644019 | TBC1D10C  | LOC442181 |  |  |
| LOC644083 | TBCEL     | LOC442597 |  |  |
| LOC644092 | TCL1A     | LOC493869 |  |  |
| LOC644276 | TCTEX1D1  | LOC550112 |  |  |
| LOC644284 | TDH       | LOC554208 |  |  |
| LOC644297 | TEX13A    | LOC641518 |  |  |
| LOC644313 | TGM6      | LOC641710 |  |  |
| LOC644353 | THBS2     | LOC641823 |  |  |
| LOC644391 | TIE1      | LOC641978 |  |  |
| LOC644415 | TIGD1     | LOC642412 |  |  |
| LOC644424 | TIMD4     | LOC642458 |  |  |
| LOC644436 | TLR4      | LOC642636 |  |  |
| LOC644544 | TLR5      | LOC642678 |  |  |
| LOC644612 | TMC8      | LOC642859 |  |  |
| LOC644644 | TMCC2     | LOC642909 |  |  |
| LOC644672 | TMCO5A    | LOC642953 |  |  |
| LOC644701 | TMEM119   | LOC642995 |  |  |
| LOC644760 | TMEM155   | LOC643008 |  |  |
| LOC644763 | TMEM163   | LOC643109 |  |  |
| LOC644844 | TMEM169   | LOC643339 |  |  |
| LOC644992 | TMEM173   | LOC643342 |  |  |
| LOC645135 | TMEM202   | LOC643388 |  |  |
| LOC645172 | TMEM204   | LOC643466 |  |  |
| LOC645195 | TMEM26    | LOC643624 |  |  |
| LOC645212 | TMEM71    | LOC643872 |  |  |
| LOC645241 | TMPRSS9   | LOC643888 |  |  |
| LOC645321 | TNF       | LOC643918 |  |  |
| LOC645330 | TNFAIP8L3 | LOC644001 |  |  |
| LOC645365 | TNFRSF11B | LOC644043 |  |  |
| LOC645431 | TNFRSF6B  | LOC644254 |  |  |
| LOC645464 | TNNI2     | LOC644404 |  |  |
| LOC645478 | TNS4      | LOC644496 |  |  |
| LOC645627 | TOP1P1    | LOC644590 |  |  |
| LOC645723 | TRIM58    | LOC644617 |  |  |
| LOC645743 | TRIM61    | LOC644919 |  |  |
| LOC645835 | TRPA1     | LOC645001 |  |  |
| LOC645963 | TRPM3     | LOC645079 |  |  |
| LOC646008 | TSPAN32   | LOC645159 |  |  |
| LOC646012 | TTY11     | LOC645367 |  |  |
| LOC646043 | TTY5      | LOC645550 |  |  |
| LOC646067 | TTYH1     | LOC645566 |  |  |

|           |         |           |  |  |
|-----------|---------|-----------|--|--|
| LOC646111 | TUBB1   | LOC645638 |  |  |
| LOC646128 | UBE2B   | LOC645726 |  |  |
| LOC646154 | UBE2MP1 | LOC645978 |  |  |
| LOC646194 | UBXD7   | LOC646100 |  |  |
| LOC646208 | UCP3    | LOC646123 |  |  |
| LOC646312 | UPK1A   | LOC646144 |  |  |
| LOC646332 | UPK3A   | LOC646513 |  |  |
| LOC646434 | UPP2    | LOC646533 |  |  |
| LOC646446 | VAV1    | LOC646548 |  |  |
| LOC646491 | VNN2    | LOC646572 |  |  |
| LOC646496 | VPREB1  | LOC646576 |  |  |
| LOC646568 | WDR40B  | LOC646632 |  |  |
| LOC646750 | WDR49   | LOC646674 |  |  |
| LOC646769 | WDR76   | LOC646762 |  |  |
| LOC646774 | WDR78   | LOC646808 |  |  |
| LOC646779 | WDR88   | LOC646916 |  |  |
| LOC646906 | WFDC1   | LOC647474 |  |  |
| LOC647012 | WNT2B   | LOC647784 |  |  |
| LOC647054 | XAGE1E  | LOC647805 |  |  |
| LOC647250 | XK      | LOC648237 |  |  |
| LOC647262 | XLKD1   | LOC648434 |  |  |
| LOC647264 | YPEL4   | LOC648608 |  |  |
| LOC647288 | ZBTB38  | LOC648758 |  |  |
| LOC647488 | ZC3H13  | LOC648984 |  |  |
| LOC647515 | ZCWPW2  | LOC649422 |  |  |
| LOC647568 | ZEB2    | LOC649445 |  |  |
| LOC647589 | ZNF121  | LOC649639 |  |  |
| LOC647718 | ZNF132  | LOC649841 |  |  |
| LOC647827 | ZNF37A  | LOC649897 |  |  |
| LOC647928 | ZNF510  | LOC649970 |  |  |
| LOC647955 | ZNF662  | LOC650034 |  |  |
| LOC647979 | ZSCAN22 | LOC650128 |  |  |
| LOC647987 |         | LOC650227 |  |  |
| LOC648057 |         | LOC650346 |  |  |
| LOC648130 |         | LOC650406 |  |  |
| LOC648153 |         | LOC650526 |  |  |
| LOC648169 |         | LOC650546 |  |  |
| LOC648196 |         | LOC650815 |  |  |
| LOC648226 |         | LOC651302 |  |  |
| LOC648293 |         | LOC651309 |  |  |
| LOC648342 |         | LOC651380 |  |  |
| LOC648366 |         | LOC651558 |  |  |
| LOC648570 |         | LOC651997 |  |  |
| LOC648585 |         | LOC652324 |  |  |
| LOC648814 |         | LOC652377 |  |  |
| LOC648963 |         | LOC652589 |  |  |
| LOC649025 |         | LOC652615 |  |  |
| LOC649186 |         | LOC652694 |  |  |
| LOC649210 |         | LOC652699 |  |  |
| LOC649270 |         | LOC652755 |  |  |
| LOC649299 |         | LOC652837 |  |  |
| LOC649379 |         | LOC652839 |  |  |
| LOC649500 |         | LOC653158 |  |  |
| LOC649613 |         | LOC653188 |  |  |
| LOC649620 |         | LOC653210 |  |  |
| LOC649680 |         | LOC653234 |  |  |



|           |  |           |  |  |
|-----------|--|-----------|--|--|
| LOC649711 |  | LOC653354 |  |  |
| LOC649754 |  | LOC653468 |  |  |
| LOC649801 |  | LOC653487 |  |  |
| LOC649977 |  | LOC653545 |  |  |
| LOC650155 |  | LOC653604 |  |  |
| LOC650263 |  | LOC653663 |  |  |
| LOC650339 |  | LOC653701 |  |  |
| LOC650562 |  | LOC653717 |  |  |
| LOC650580 |  | LOC653877 |  |  |
| LOC650706 |  | LOC653878 |  |  |
| LOC651102 |  | LOC654109 |  |  |
| LOC651169 |  | LOC654123 |  |  |
| LOC651213 |  | LOC727759 |  |  |
| LOC651520 |  | LOC727882 |  |  |
| LOC651745 |  | LOC727884 |  |  |
| LOC651772 |  | LOC727913 |  |  |
| LOC651777 |  | LOC727948 |  |  |
| LOC652002 |  | LOC727997 |  |  |
| LOC652078 |  | LOC728115 |  |  |
| LOC652097 |  | LOC728170 |  |  |
| LOC652234 |  | LOC728178 |  |  |
| LOC652291 |  | LOC728275 |  |  |
| LOC652326 |  | LOC728411 |  |  |
| LOC652330 |  | LOC728417 |  |  |
| LOC652458 |  | LOC728452 |  |  |
| LOC652470 |  | LOC728465 |  |  |
| LOC652534 |  | LOC728470 |  |  |
| LOC652570 |  | LOC728509 |  |  |
| LOC652577 |  | LOC728653 |  |  |
| LOC652630 |  | LOC728686 |  |  |
| LOC652674 |  | LOC728715 |  |  |
| LOC652675 |  | LOC728942 |  |  |
| LOC652688 |  | LOC728971 |  |  |
| LOC652697 |  | LOC729065 |  |  |
| LOC652713 |  | LOC729137 |  |  |
| LOC652771 |  | LOC729143 |  |  |
| LOC652846 |  | LOC729157 |  |  |
| LOC652900 |  | LOC729212 |  |  |
| LOC652904 |  | LOC729260 |  |  |
| LOC653100 |  | LOC729272 |  |  |
| LOC653111 |  | LOC729372 |  |  |
| LOC653157 |  | LOC729389 |  |  |
| LOC653197 |  | LOC729558 |  |  |
| LOC653204 |  | LOC729602 |  |  |
| LOC653269 |  | LOC729684 |  |  |
| LOC653316 |  | LOC729764 |  |  |
| LOC653349 |  | LOC729793 |  |  |
| LOC653471 |  | LOC729810 |  |  |
| LOC653539 |  | LOC729828 |  |  |
| LOC653596 |  | LOC729858 |  |  |
| LOC653796 |  | LOC729941 |  |  |
| LOC653853 |  | LOC730051 |  |  |
| LOC653876 |  | LOC730092 |  |  |
| LOC653962 |  | LOC730153 |  |  |
| LOC654078 |  | LOC730173 |  |  |
| LOC654128 |  | LOC730183 |  |  |

|           |  |           |  |  |
|-----------|--|-----------|--|--|
| LOC654253 |  | LOC730286 |  |  |
| LOC727721 |  | LOC730644 |  |  |
| LOC727832 |  | LOC730877 |  |  |
| LOC727868 |  | LOC730994 |  |  |
| LOC727901 |  | LOC730995 |  |  |
| LOC727924 |  | LOC731742 |  |  |
| LOC727935 |  | LOC731751 |  |  |
| LOC727980 |  | LOC731915 |  |  |
| LOC728116 |  | LOC732146 |  |  |
| LOC728190 |  | LOC732450 |  |  |
| LOC728205 |  | LOC81691  |  |  |
| LOC728247 |  | LOC90120  |  |  |
| LOC728308 |  | LOC90499  |  |  |
| LOC728362 |  | LOC91431  |  |  |
| LOC728400 |  | LOC91461  |  |  |
| LOC728448 |  | LOC91661  |  |  |
| LOC728493 |  | LOC92659  |  |  |
| LOC728518 |  | LOXHD1    |  |  |
| LOC728519 |  | LPAR1     |  |  |
| LOC728530 |  | LPAR2     |  |  |
| LOC728543 |  | LPAR5     |  |  |
| LOC728591 |  | LPHN1     |  |  |
| LOC728664 |  | LPL       |  |  |
| LOC728678 |  | LRMP      |  |  |
| LOC728683 |  | LRP6      |  |  |
| LOC728711 |  | LRRC37A4  |  |  |
| LOC728743 |  | LRRC38    |  |  |
| LOC728790 |  | LRRC6     |  |  |
| LOC728876 |  | LRRN2     |  |  |
| LOC728924 |  | LSAMP     |  |  |
| LOC728929 |  | LTB4R     |  |  |
| LOC729008 |  | LTBP2     |  |  |
| LOC729020 |  | LUM       |  |  |
| LOC729046 |  | LXN       |  |  |
| LOC729051 |  | LYPD6B    |  |  |
| LOC729173 |  | LYSMD1    |  |  |
| LOC729176 |  | LYST      |  |  |
| LOC729198 |  | MAD2L1    |  |  |
| LOC729209 |  | MAGOHB    |  |  |
| LOC729234 |  | MAP2      |  |  |
| LOC729351 |  | MAP3K13   |  |  |
| LOC729374 |  | MAP4K1    |  |  |
| LOC729408 |  | MAP7D2    |  |  |
| LOC729409 |  | MAPK10    |  |  |
| LOC729433 |  | MARCH9    |  |  |
| LOC729438 |  | MBLAC2    |  |  |
| LOC729530 |  | MBOAT2    |  |  |
| LOC729570 |  | MCF2L     |  |  |
| LOC729609 |  | MCM10     |  |  |
| LOC729642 |  | MCM2      |  |  |
| LOC729645 |  | MCM3APAS  |  |  |
| LOC729659 |  | MECP2     |  |  |
| LOC729667 |  | MED18     |  |  |
| LOC729683 |  | MEG8      |  |  |
| LOC729739 |  | MELK      |  |  |
| LOC729806 |  | MEP1A     |  |  |

|           |  |          |  |  |
|-----------|--|----------|--|--|
| LOC729885 |  | METTL4   |  |  |
| LOC729950 |  | MEX3B    |  |  |
| LOC729952 |  | MFAP4    |  |  |
| LOC730007 |  | MFAP5    |  |  |
| LOC730012 |  | MGAT3    |  |  |
| LOC730024 |  | MGC16121 |  |  |
| LOC730036 |  | MGC27345 |  |  |
| LOC730087 |  | MGC27348 |  |  |
| LOC730130 |  | MGC39900 |  |  |
| LOC730234 |  | MGC5457  |  |  |
| LOC730387 |  | MICB     |  |  |
| LOC730393 |  | MIPOL1   |  |  |
| LOC730396 |  | MIR1909  |  |  |
| LOC730413 |  | MIR25    |  |  |
| LOC730427 |  | MIR886   |  |  |
| LOC730517 |  | MITF     |  |  |
| LOC730952 |  | MKI67    |  |  |
| LOC731139 |  | MKS1     |  |  |
| LOC731227 |  | MLF1     |  |  |
| LOC731642 |  | MLF1IP   |  |  |
| LOC731718 |  | MMP11    |  |  |
| LOC731835 |  | MMP9     |  |  |
| LOC731895 |  | MND1     |  |  |
| LOC731932 |  | MORN4    |  |  |
| LOC732160 |  | MPZ      |  |  |
| LOC732229 |  | MRE11A   |  |  |
| LOC732443 |  | MSH2     |  |  |
| LOH12CR2  |  | MSH5     |  |  |
| LOH3CR2A  |  | MSLN     |  |  |
| LOXL1     |  | MSRB3    |  |  |
| LOXL3     |  | MTBP     |  |  |
| LPCAT2    |  | MTHFD2   |  |  |
| LPHN3     |  | MTHFD2L  |  |  |
| LPPR3     |  | MTL5     |  |  |
| LRCH1     |  | MUM1L1   |  |  |
| LRCH2     |  | MXD3     |  |  |
| LRFN4     |  | MXRA5    |  |  |
| LRFN5     |  | MXRA8    |  |  |
| LRP1B     |  | MYB      |  |  |
| LRP2      |  | MYBL2    |  |  |
| LRP4      |  | MYCBP    |  |  |
| LRP8      |  | MYCL1    |  |  |
| LRRC16B   |  | MYCN     |  |  |
| LRRC37A   |  | MYCT1    |  |  |
| LRRC49    |  | MYH3     |  |  |
| LRRC69    |  | MYL1     |  |  |
| LRRN1     |  | MYL2     |  |  |
| LRRN4     |  | MYL4     |  |  |
| LSM11     |  | MYL9     |  |  |
| LY6G6C    |  | MYLK4    |  |  |
| LYG1      |  | MYO10    |  |  |
| LYPD1     |  | MYO19    |  |  |
| LYPD5     |  | MYO9A    |  |  |
| LYPD6     |  | MYOF     |  |  |
| MAGEC2    |  | MYOZ3    |  |  |
| MAGI1     |  | NAALAD2  |  |  |

|           |  |            |  |  |
|-----------|--|------------|--|--|
| MAL       |  | NACC1      |  |  |
| MAMDC2    |  | NANOS3     |  |  |
| MAML3     |  | NBEA       |  |  |
| MAP1A     |  | NCAPG      |  |  |
| MAP1B     |  | NCAPG2     |  |  |
| MAP1LC3B2 |  | NCF4       |  |  |
| MAP9      |  | NCRNA00085 |  |  |
| MAPK8IP2  |  | NCRNA00153 |  |  |
| MAPKBP1   |  | NDUFB1     |  |  |
| MARCH11   |  | NDUFS1     |  |  |
| MARK1     |  | NEDD1      |  |  |
| MARVELD1  |  | NEFH       |  |  |
| MATN1     |  | NEIL3      |  |  |
| MATN3     |  | NES        |  |  |
| MBD5      |  | NETO2      |  |  |
| MBL1P1    |  | NEURL4     |  |  |
| MCF2L2    |  | NEXN       |  |  |
| MCOLN2    |  | NFE2       |  |  |
| MCOLN3    |  | NID2       |  |  |
| MECR      |  | NLGN4X     |  |  |
| MED12L    |  | NLGN4Y     |  |  |
| MEGF6     |  | NLK        |  |  |
| MEI1      |  | NLRC3      |  |  |
| MEIS3     |  | NLRP2      |  |  |
| METT10D   |  | NMU        |  |  |
| METTL2B   |  | NOS3       |  |  |
| MFSD6L    |  | NOSTRIN    |  |  |
| MFSD9     |  | NOTCH3     |  |  |
| MGC11082  |  | NOX4       |  |  |
| MGC12965  |  | NPAT       |  |  |
| MGC13005  |  | NPDC1      |  |  |
| MGC15634  |  | NPHP1      |  |  |
| MGC20983  |  | NPHP4      |  |  |
| MGC23270  |  | NPY        |  |  |
| MGC24103  |  | NR1D1      |  |  |
| MGC26718  |  | NR2C2      |  |  |
| MGC35440  |  | NRCAM      |  |  |
| MGC42630  |  | NRGN       |  |  |
| MGC45800  |  | NSUN7      |  |  |
| MGC52498  |  | NT5DC2     |  |  |
| MIA       |  | NT5M       |  |  |
| MINK1     |  | NTS        |  |  |
| MIP       |  | NUDT11     |  |  |
| MIR1247   |  | NUF2       |  |  |
| MIR128-2  |  | NUP210     |  |  |
| MIR181C   |  | NUP62CL    |  |  |
| MIR1915   |  | NXNL1      |  |  |
| MIR205    |  | NYNRIN     |  |  |
| MIR21     |  | OBSCN      |  |  |
| MIR212    |  | ODF2L      |  |  |
| MIR30C2   |  | OIP5       |  |  |
| MIR326    |  | OLFML1     |  |  |
| MIR448    |  | OLFML2A    |  |  |
| MIR450A1  |  | OLFML3     |  |  |
| MIR532    |  | OLR1       |  |  |
| MIR577    |  | OR1J1      |  |  |

|         |  |          |  |  |
|---------|--|----------|--|--|
| MIR642  |  | OR1L8    |  |  |
| MIR708  |  | OR2T12   |  |  |
| MLC1    |  | OR2W3    |  |  |
| MLH3    |  | ORC4L    |  |  |
| MLLT1   |  | OSBP2    |  |  |
| MMP1    |  | OSBPL10  |  |  |
| MMP14   |  | OSBPL3   |  |  |
| MMP2    |  | OSBPL5   |  |  |
| MMP21   |  | OSM      |  |  |
| MMP24   |  | OTUD3    |  |  |
| MMP28   |  | OTUD7B   |  |  |
| MOBKL2B |  | OXCT1    |  |  |
| MORN3   |  | P2RY5    |  |  |
| MOXD1   |  | PABPC4L  |  |  |
| MPP7    |  | PACRGL   |  |  |
| MPPED2  |  | PACSIN1  |  |  |
| MRAP2   |  | PAMR1    |  |  |
| MRC2    |  | PAPPA    |  |  |
| MREG    |  | PAQR8    |  |  |
| MRGPRX1 |  | PBK      |  |  |
| MRGPRX3 |  | PBX1     |  |  |
| MRGPRX4 |  | PCBD2    |  |  |
| MSX2    |  | PCDH17   |  |  |
| MT4     |  | PCDH18   |  |  |
| MTHFSD  |  | PCDH7    |  |  |
| MTMR1   |  | PCYOX1L  |  |  |
| MTMR7   |  | PDE5A    |  |  |
| MTUS2   |  | PDGFB    |  |  |
| MUC15   |  | PDGFD    |  |  |
| MUC16   |  | PDGFRA   |  |  |
| MURC    |  | PEAR1    |  |  |
| MYBL1   |  | PEG10    |  |  |
| MYBPC3  |  | PEG3     |  |  |
| MYBPHL  |  | PFN4     |  |  |
| MYL3    |  | PGAP1    |  |  |
| MYL7    |  | PGBD1    |  |  |
| MYO3A   |  | PGBD2    |  |  |
| MYO5A   |  | PGM2L1   |  |  |
| MYOZ1   |  | PGM5     |  |  |
| NACAD   |  | PHF21B   |  |  |
| NAP1L3  |  | PHYHIPL  |  |  |
| NAP1L6  |  | PI4KA    |  |  |
| NAT11   |  | PIAS3    |  |  |
| NAV1    |  | PIP4K2B  |  |  |
| NBR2    |  | PIP5K1B  |  |  |
| NCAM1   |  | PIP5K2A  |  |  |
| NCCR1P1 |  | PKIA     |  |  |
| NEBL    |  | PKMYT1   |  |  |
| NELL2   |  | PKN3     |  |  |
| NF1     |  | PLA2G12A |  |  |
| NFKBIL2 |  | PLA2G7   |  |  |
| NGF     |  | PLAC8    |  |  |
| NHS     |  | PLAC9    |  |  |
| NIPAL4  |  | PLAGL1   |  |  |
| NKAIN4  |  | PLAT     |  |  |
| NKPD1   |  | PLEKHG4  |  |  |

|         |  |          |  |  |
|---------|--|----------|--|--|
| NKX2-3  |  | PLEKHH1  |  |  |
| NLGN1   |  | PLK1     |  |  |
| NLRP12  |  | PLK4     |  |  |
| NLRP7   |  | PLXDC2   |  |  |
| NME5    |  | PLXNA2   |  |  |
| NMNAT2  |  | PMAIP1   |  |  |
| NOD1    |  | PML      |  |  |
| NOG     |  | PMS1     |  |  |
| NOL4    |  | PMS2L2   |  |  |
| NOVA1   |  | PNMAL1   |  |  |
| NPAS3   |  | POGZ     |  |  |
| NPNT    |  | POLL     |  |  |
| NR0B1   |  | POLQ     |  |  |
| NRXN3   |  | POLR3D   |  |  |
| NTF4    |  | POMC     |  |  |
| NTF5    |  | POSTN    |  |  |
| NTN5    |  | POU2F1   |  |  |
| NTNG1   |  | PPP1R14A |  |  |
| NTRK2   |  | PPP1R1B  |  |  |
| NUDCD1  |  | PPP1R3D  |  |  |
| NUDT13  |  | PPP1R3F  |  |  |
| NUMBL   |  | PPP2R3B  |  |  |
| NXF4    |  | PRDM1    |  |  |
| NXPH2   |  | PREX1    |  |  |
| OBSL1   |  | PRICKLE1 |  |  |
| OCA2    |  | PRKACB   |  |  |
| OCLN    |  | PRKCQ    |  |  |
| ODAM    |  | PRKX     |  |  |
| ODZ3    |  | PRKY     |  |  |
| ODZ4    |  | PROK1    |  |  |
| OPHN1   |  | PROM1    |  |  |
| OR2H2   |  | PRR11    |  |  |
| OR2L13  |  | PRR15    |  |  |
| OR7E91P |  | PRRT1    |  |  |
| OSAP    |  | PRRT2    |  |  |
| OSR2    |  | PRSS35   |  |  |
| OTUB2   |  | PRTFDC1  |  |  |
| OTX2    |  | PSCDBP   |  |  |
| OVOL1   |  | PSG2     |  |  |
| OVOL2   |  | PSG6     |  |  |
| OXGR1   |  | PSG7     |  |  |
| P2RX2   |  | PSORS1C1 |  |  |
| P2RX6   |  | PSRC1    |  |  |
| P2RY6   |  | PTGIS    |  |  |
| PA2G4P4 |  | PTH1R    |  |  |
| PADI2   |  | PTK7     |  |  |
| PAIP2B  |  | PTN      |  |  |
| PAK6    |  | PTP4A3   |  |  |
| PAPOLG  |  | PTTG3P   |  |  |
| PAQR6   |  | PUS7L    |  |  |
| PAR5    |  | PWWP2A   |  |  |
| PARD3   |  | PYGO2    |  |  |
| PARG    |  | QPCTL    |  |  |
| PARM1   |  | QRSL1    |  |  |
| PART1   |  | RAB25    |  |  |
| PATE1   |  | RAB34    |  |  |

|          |  |          |  |  |
|----------|--|----------|--|--|
| PATZ1    |  | RAB38    |  |  |
| PBX4     |  | RAB3B    |  |  |
| PCBP3    |  | RACGAP1  |  |  |
| PCDH10   |  | RAD51AP1 |  |  |
| PCDH11X  |  | RAD54B   |  |  |
| PCDH11Y  |  | RAD54L   |  |  |
| PCDH19   |  | RALGPS2  |  |  |
| PCDHA1   |  | RAMP2    |  |  |
| PCDHA2   |  | RAP1A    |  |  |
| PCDHA3   |  | RARB     |  |  |
| PCDHA4   |  | RASL11B  |  |  |
| PCDHB10  |  | RASL12   |  |  |
| PCDHB13  |  | RAVER2   |  |  |
| PCDHB16  |  | RAX2     |  |  |
| PCDHB17  |  | RB1      |  |  |
| PCDHB18  |  | RBL1     |  |  |
| PCDHB2   |  | RBM19    |  |  |
| PCDHB3   |  | RBMS2    |  |  |
| PCDHB4   |  | RBP2     |  |  |
| PCDHB5   |  | RCOR2    |  |  |
| PCDHGA12 |  | RCSD1    |  |  |
| PCLO     |  | RDM1     |  |  |
| PCNXL2   |  | RECK     |  |  |
| PCP4     |  | RECQL4   |  |  |
| PDAP1    |  | RECQL5   |  |  |
| PDE4D    |  | REEP1    |  |  |
| PDE6B    |  | RELN     |  |  |
| PDE8B    |  | RENBP    |  |  |
| PDGFA    |  | REP15    |  |  |
| PDK1     |  | RFPL1    |  |  |
| PDPN     |  | RFXAP    |  |  |
| PDXDC2   |  | RFXDC2   |  |  |
| PDZD2    |  | RGPD4    |  |  |
| PDZD3    |  | RGS16    |  |  |
| PDZRN3   |  | RGS17    |  |  |
| PELI3    |  | RGS5     |  |  |
| PFKFB2   |  | RHBDL3   |  |  |
| PGBD4    |  | RHOBTB2  |  |  |
| PGF      |  | RIMKLB   |  |  |
| PHACTR1  |  | RIMS3    |  |  |
| PHC3     |  | RIN3     |  |  |
| PHF6     |  | RNASE6   |  |  |
| PHF8     |  | RNASEH2C |  |  |
| PI15     |  | RNF144A  |  |  |
| PIB5PA   |  | RNF150   |  |  |
| PIP5K1A  |  | RNF157   |  |  |
| PITX1    |  | RNF182   |  |  |
| PITX2    |  | RNF43    |  |  |
| PIWIL4   |  | RNFT2    |  |  |
| PKD1L2   |  | RNU105C  |  |  |
| PKNOX2   |  | RNU2-1   |  |  |
| PKP3     |  | RNU4-2   |  |  |
| PLA2G10  |  | ROBO1    |  |  |
| PLAC1    |  | ROPN1B   |  |  |
| PLAC2    |  | ROR1     |  |  |
| PLCD3    |  | RPP25    |  |  |

|          |  |          |  |  |
|----------|--|----------|--|--|
| PLCE1    |  | RRM2     |  |  |
| PLCXD3   |  | RSBN1L   |  |  |
| PLD5     |  | RSF1     |  |  |
| PLEKHG2  |  | RSPO3    |  |  |
| PLEKHG4B |  | S100A3   |  |  |
| PLEKHG5  |  | S1PR3    |  |  |
| PLSCR5   |  | S1PR4    |  |  |
| PMFBP1   |  | SAC      |  |  |
| PNCK     |  | SACS     |  |  |
| POLI     |  | SALL2    |  |  |
| POPDC2   |  | SALL4    |  |  |
| PORCN    |  | SAMD1    |  |  |
| POTEG    |  | SAMD14   |  |  |
| POU6F1   |  | SASS6    |  |  |
| PPEF1    |  | SCAMP5   |  |  |
| PPIL2    |  | SCAND2   |  |  |
| PPIL6    |  | SCAND3   |  |  |
| PPM1J    |  | SCARA3   |  |  |
| PPP1R9A  |  | SCARF2   |  |  |
| PRDM5    |  | SCARNA16 |  |  |
| PRDM7    |  | SCLT1    |  |  |
| PRH1     |  | SCRN1    |  |  |
| PRICKLE3 |  | SCTR     |  |  |
| PRINS    |  | SDCCAG8  |  |  |
| PRKAA2   |  | SDK2     |  |  |
| PRKCE    |  | SDR16C5  |  |  |
| PROCA1   |  | SEC31B   |  |  |
| PROM2    |  | SEMA3F   |  |  |
| PRPF39   |  | SEMA4D   |  |  |
| PRPH     |  | SEMA5A   |  |  |
| PRRX1    |  | SEMA6A   |  |  |
| PRSS12   |  | SEPT10   |  |  |
| PRSS16   |  | SERHL    |  |  |
| PRSS22   |  | SERINC4  |  |  |
| PRTG     |  | SERINC5  |  |  |
| PSD2     |  | SERPINI1 |  |  |
| PTCD3    |  | SESN3    |  |  |
| PTCH1    |  | SEZ6L2   |  |  |
| PTCHD1   |  | SFI1     |  |  |
| PTER     |  | SFMBT2   |  |  |
| PTGES    |  | SFRP1    |  |  |
| PTPDC1   |  | SGCB     |  |  |
| PTPN13   |  | SGOL1    |  |  |
| PTPN14   |  | SGOL2    |  |  |
| PTPRR    |  | SGPP2    |  |  |
| PVRL4    |  | SGSM1    |  |  |
| PWP2     |  | SH3BP1   |  |  |
| RABL5    |  | SH3GL3   |  |  |
| RAD18    |  | SH3PXD2B |  |  |
| RAD52    |  | SHISA2   |  |  |
| RADIL    |  | SHPRH    |  |  |
| RALYL    |  | SIX4     |  |  |
| RANBP2L1 |  | SKA1     |  |  |
| RASA2    |  | SLA      |  |  |
| RASAL2   |  | SLAMF7   |  |  |
| RASEF    |  | SLC12A6  |  |  |



|         |  |          |  |  |
|---------|--|----------|--|--|
| RASGRP1 |  | SLC14A1  |  |  |
| RASL10B |  | SLC16A9  |  |  |
| RASSF9  |  | SLC1A3   |  |  |
| RBAK    |  | SLC1A5   |  |  |
| RBM11   |  | SLC22A15 |  |  |
| RBM20   |  | SLC22A4  |  |  |
| RBM35A  |  | SLC24A3  |  |  |
| RBMS3   |  | SLC25A36 |  |  |
| RBMY3AP |  | SLC2A5   |  |  |
| RCAN2   |  | SLC35B4  |  |  |
| RCAN3   |  | SLC39A10 |  |  |
| RCBTB1  |  | SLC43A2  |  |  |
| REEP2   |  | SLC45A4  |  |  |
| REG1A   |  | SLC6A8   |  |  |
| RERG    |  | SLC7A8   |  |  |
| RETNLB  |  | SLC9A4   |  |  |
| RFPL3S  |  | SLC9A9   |  |  |
| RFT1    |  | SLCO2A1  |  |  |
| RFX3    |  | SLCO3A1  |  |  |
| RFX6    |  | SLIT2    |  |  |
| RGAG1   |  | SLIT3    |  |  |
| RGL3    |  | SLMO1    |  |  |
| RGP1    |  | SLN      |  |  |
| RGPD5   |  | SMAD6    |  |  |
| RGPD8   |  | SMARCD3  |  |  |
| RGS11   |  | SMC1A    |  |  |
| RGS20   |  | SMC6     |  |  |
| RGS4    |  | SMG6     |  |  |
| RGS7BP  |  | SNAP25   |  |  |
| RIC3    |  | SNCA     |  |  |
| RICTOR  |  | SNCAIP   |  |  |
| RIMBP3B |  | SNORA26  |  |  |
| RIMS2   |  | SNORA28  |  |  |
| RLN1    |  | SNORA29  |  |  |
| RLN2    |  | SNORA42  |  |  |
| RNF180  |  | SNORA5B  |  |  |
| RNF39   |  | SNORA70B |  |  |
| RNU105A |  | SNORA72  |  |  |
| RNU11   |  | SNORA77  |  |  |
| RNU4-1  |  | SNORD11  |  |  |
| ROR2    |  | SNORD13  |  |  |
| RPA4    |  | SNORD17  |  |  |
| RPESP   |  | SNORD52  |  |  |
| RPRM    |  | SNORD80  |  |  |
| RSPO1   |  | SNRPE    |  |  |
| RSPO2   |  | SOSTDC1  |  |  |
| RTKN2   |  | SOX11    |  |  |
| RUFY2   |  | SP6      |  |  |
| RYR2    |  | SPAG5    |  |  |
| RYR3    |  | SPC25    |  |  |
| SALL3   |  | SPG20    |  |  |
| SAMD10  |  | SPOCK2   |  |  |
| SAMD8   |  | SPON1    |  |  |
| SATB1   |  | SPTBN4   |  |  |
| SBSN    |  | SPTLC2   |  |  |
| SCARNA3 |  | SRGAP1   |  |  |

|          |  |            |  |  |
|----------|--|------------|--|--|
| SCD5     |  | SRPX       |  |  |
| SCN2B    |  | SRR        |  |  |
| SCRG1    |  | SSH1       |  |  |
| SCUBE3   |  | SSX2IP     |  |  |
| SCXA     |  | ST6GALNAC3 |  |  |
| SDK1     |  | ST8SIA4    |  |  |
| SEC15L2  |  | STAG3      |  |  |
| SEC61A2  |  | STAR       |  |  |
| SELE     |  | STEAP2     |  |  |
| SELV     |  | STMN2      |  |  |
| SEMA3A   |  | STOX1      |  |  |
| SEMA3B   |  | STX18      |  |  |
| SEMA3C   |  | STXBP1     |  |  |
| SEMA5B   |  | STXBP5     |  |  |
| SEMA6D   |  | SUDS3      |  |  |
| SEMA7A   |  | SULF1      |  |  |
| SENP1    |  | SULT4A1    |  |  |
| SEPT1    |  | SUPT3H     |  |  |
| SEPT13   |  | SUPT7L     |  |  |
| SEPT3    |  | SUZ12P     |  |  |
| SERPINB7 |  | SVEP1      |  |  |
| SERPINE3 |  | SYDE1      |  |  |
| SERTAD4  |  | SYK        |  |  |
| SFRP2    |  | SYNJ2      |  |  |
| SGCG     |  | TAAR8      |  |  |
| SH2B2    |  | TACC3      |  |  |
| SH3BGR   |  | TADA2A     |  |  |
| SH3BP5   |  | TAF1A      |  |  |
| SH3GL2   |  | TAF1L      |  |  |
| SHOX2    |  | TAF5       |  |  |
| SIKE     |  | TANC2      |  |  |
| SIM2     |  | TARBP1     |  |  |
| SIRPD    |  | TARSL2     |  |  |
| SKIL     |  | TAS2R10    |  |  |
| SLC12A5  |  | TBC1D22B   |  |  |
| SLC13A4  |  | TBC1D5     |  |  |
| SLC15A2  |  | TBX1       |  |  |
| SLC16A1  |  | TBX19      |  |  |
| SLC16A14 |  | TBX2       |  |  |
| SLC16A6  |  | TCAM1      |  |  |
| SLC1A6   |  | TCEAL7     |  |  |
| SLC22A11 |  | TCF19      |  |  |
| SLC2A14  |  | TCF21      |  |  |
| SLC30A2  |  | TCF4       |  |  |
| SLC30A8  |  | TCL1B      |  |  |
| SLC34A1  |  | TEAD4      |  |  |
| SLC35E2  |  | TEK        |  |  |
| SLC35F1  |  | TEKT1      |  |  |
| SLC35F3  |  | TESSP5     |  |  |
| SLC38A8  |  | TET1       |  |  |
| SLC39A2  |  | TEX11      |  |  |
| SLC4A11  |  | TFAP4      |  |  |
| SLC4A3   |  | TFCP2L1    |  |  |
| SLC4A8   |  | TFPI2      |  |  |
| SLC5A3   |  | TGM1       |  |  |
| SLC6A15  |  | THBS4      |  |  |

|          |  |          |  |  |
|----------|--|----------|--|--|
| SLC6A4   |  | THY1     |  |  |
| SLC6A6   |  | TIGD7    |  |  |
| SLC7A11  |  | TM4SF18  |  |  |
| SLC9A2   |  | TMC6     |  |  |
| SLC9A5   |  | TMEM107  |  |  |
| SLCO1A2  |  | TMEM117  |  |  |
| SLCO6A1  |  | TMEM118  |  |  |
| SLFN5    |  | TMEM128  |  |  |
| SMA5     |  | TMEM132B |  |  |
| SMAD9    |  | TMEM161B |  |  |
| SMN2     |  | TMEM168  |  |  |
| SMOC2    |  | TMEM194  |  |  |
| SMPX     |  | TMEM194B |  |  |
| SMTNL2   |  | TMEM8B   |  |  |
| SMYD5    |  | TMOD2    |  |  |
| SNAP91   |  | TMPRSS13 |  |  |
| SNORA11E |  | TMSB15A  |  |  |
| SNORA31  |  | TMSB4Y   |  |  |
| SNORA49  |  | TNFRSF25 |  |  |
| SNORA55  |  | TNFSF4   |  |  |
| SNORA73A |  | TNNC1    |  |  |
| SNORA73B |  | TOP2A    |  |  |
| SNORA84  |  | TOX2     |  |  |
| SNORD123 |  | TP53I11  |  |  |
| SNORD21  |  | TPX2     |  |  |
| SNORD35A |  | TRAF2    |  |  |
| SNORD73A |  | TRAF5    |  |  |
| SOCS7    |  | TRAIP    |  |  |
| SOD3     |  | TREML2   |  |  |
| SOHLH2   |  | TRIB2    |  |  |
| SORCS1   |  | TRIL     |  |  |
| SOS1     |  | TRIM6    |  |  |
| SOX15    |  | TRIM65   |  |  |
| SOX17    |  | TRIM67   |  |  |
| SOX2     |  | TRIM71   |  |  |
| SOX21    |  | TRIP13   |  |  |
| SOX3     |  | TRO      |  |  |
| SP140L   |  | TROAP    |  |  |
| SP5      |  | TRPC1    |  |  |
| SP8      |  | TRPV1    |  |  |
| SPANXA2  |  | TRPV2    |  |  |
| SPANXB1  |  | TSPAN18  |  |  |
| SPATA17  |  | TSPAN5   |  |  |
| SPATA18  |  | TSPYL3   |  |  |
| SPATA22  |  | TSPYL5   |  |  |
| SPATA6   |  | TTC18    |  |  |
| SPDYA    |  | TTC25    |  |  |
| SPEF2    |  | TTC26    |  |  |
| SPINK5   |  | TTC39B   |  |  |
| SPINT1   |  | TTK      |  |  |
| SPNS3    |  | TUBAL3   |  |  |
| SPOCK1   |  | TUBB4    |  |  |
| SPSB4    |  | TUBD1    |  |  |
| SRD5A2L2 |  | TUSC3    |  |  |
| SSPN     |  | TWIST1   |  |  |
| SST      |  | TXNDC16  |  |  |

|         |  |         |  |  |
|---------|--|---------|--|--|
| SSX3    |  | TXNL4B  |  |  |
| STAC    |  | UAP1L1  |  |  |
| STC1    |  | UBASH3B |  |  |
| STELLAR |  | UBE2C   |  |  |
| STK38L  |  | UBE2CBP |  |  |
| STON1   |  | UBE2T   |  |  |
| STRA6   |  | UBN2    |  |  |
| STS     |  | UBQLNL  |  |  |
| STX19   |  | UBR1    |  |  |
| STYK1   |  | UCA1    |  |  |
| SUFU    |  | UCP2    |  |  |
| SULT1C4 |  | UHMK1   |  |  |
| SUMO4   |  | UHRF1   |  |  |
| SV2A    |  | UNC13D  |  |  |
| SVOPL   |  | UNC5C   |  |  |
| SYCE2   |  | USP32   |  |  |
| SYN1    |  | USP6    |  |  |
| SYNC1   |  | USP9Y   |  |  |
| SYNPO2  |  | UST     |  |  |
| SYNPR   |  | VANGL2  |  |  |
| SYT1    |  | VAPB    |  |  |
| SYT13   |  | VASH1   |  |  |
| SYT3    |  | VASH2   |  |  |
| SYT6    |  | VAT1L   |  |  |
| SYTL1   |  | VAV3    |  |  |
| SYTL3   |  | VCAM1   |  |  |
| TAC3    |  | VCAN    |  |  |
| TAC4    |  | VEGFC   |  |  |
| TAF1    |  | VPRBP   |  |  |
| TAGLN3  |  | VPS13C  |  |  |
| TBC1D1  |  | WAPAL   |  |  |
| TBC1D26 |  | WASPIP  |  |  |
| TBC1D3H |  | WBSCR19 |  |  |
| TBKBP1  |  | WDHD1   |  |  |
| TBN     |  | WDR27   |  |  |
| TBRG1   |  | WDR35   |  |  |
| TC2N    |  | WDR5B   |  |  |
| TCEAL2  |  | WDR62   |  |  |
| TCERG1L |  | WDR67   |  |  |
| TCL6    |  | WDR86   |  |  |
| TEX9    |  | WFIKKN1 |  |  |
| TFAP2A  |  | WHSC1   |  |  |
| TFAP2B  |  | WHSC1L1 |  |  |
| TFAP2C  |  | WIPF1   |  |  |
| TGFBR1  |  | WNK4    |  |  |
| THAP3   |  | WSCD1   |  |  |
| THAP9   |  | WTIP    |  |  |
| THEX1   |  | XAGE1D  |  |  |
| THSD1P  |  | XRCC3   |  |  |
| THSD3   |  | YTHDC2  |  |  |
| TIAM1   |  | ZBTB46  |  |  |
| TIAM2   |  | ZDHHC8P |  |  |
| TIMP4   |  | ZFP112  |  |  |
| TINAGL1 |  | ZFP14   |  |  |
| TLE3    |  | ZFP30   |  |  |
| TMC7    |  | ZFP37   |  |  |

|                 |  |         |  |  |
|-----------------|--|---------|--|--|
| TMCC3           |  | ZFP82   |  |  |
| TMEFF1          |  | ZKSCAN4 |  |  |
| TMEM108         |  | ZMYND17 |  |  |
| TMEM125         |  | ZNF135  |  |  |
| TMEM16B         |  | ZNF137  |  |  |
| TMEM200A        |  | ZNF167  |  |  |
| TMEM231         |  | ZNF175  |  |  |
| TMEM31          |  | ZNF182  |  |  |
| TMEM40          |  | ZNF184  |  |  |
| TMEM55A         |  | ZNF185  |  |  |
| TMEM59L         |  | ZNF2    |  |  |
| TMEM67          |  | ZNF202  |  |  |
| TMEM68          |  | ZNF211  |  |  |
| TMEM86A         |  | ZNF213  |  |  |
| TMEM87B         |  | ZNF224  |  |  |
| TMEM90B         |  | ZNF225  |  |  |
| TMEM92          |  | ZNF230  |  |  |
| TMPRSS7         |  | ZNF234  |  |  |
| TMTC1           |  | ZNF248  |  |  |
| TMTC2           |  | ZNF273  |  |  |
| TncRNA          |  | ZNF28   |  |  |
| TNFRSF8         |  | ZNF280B |  |  |
| TNFSF12-TNFSF13 |  | ZNF283  |  |  |
| TNFSF9          |  | ZNF285A |  |  |
| TNKS            |  | ZNF286C |  |  |
| TNKS2           |  | ZNF311  |  |  |
| TNNI3           |  | ZNF334  |  |  |
| TNNT1           |  | ZNF335  |  |  |
| TNRC18          |  | ZNF346  |  |  |
| TOX             |  | ZNF383  |  |  |
| TP53TG3         |  | ZNF415  |  |  |
| TP63            |  | ZNF418  |  |  |
| TP73L           |  | ZNF431  |  |  |
| TPBG            |  | ZNF439  |  |  |
| TPCN1           |  | ZNF462  |  |  |
| TPPP3           |  | ZNF471  |  |  |
| TRAF3IP3        |  | ZNF484  |  |  |
| TREM1           |  | ZNF485  |  |  |
| TRERF1          |  | ZNF491  |  |  |
| TREX1           |  | ZNF493  |  |  |
| TRH             |  | ZNF502  |  |  |
| TRIM17          |  | ZNF514  |  |  |
| TRIM62          |  | ZNF521  |  |  |
| TRIM63          |  | ZNF525  |  |  |
| TRIML2          |  | ZNF532  |  |  |
| TRPV6           |  | ZNF543  |  |  |
| TSGA10          |  | ZNF571  |  |  |
| TSPAN2          |  | ZNF573  |  |  |
| TSPY1           |  | ZNF594  |  |  |
| TSPY3           |  | ZNF605  |  |  |
| TTC30B          |  | ZNF606  |  |  |
| TTC7A           |  | ZNF608  |  |  |
| TTLL7           |  | ZNF609  |  |  |
| TTN             |  | ZNF611  |  |  |
| TTY15           |  | ZNF616  |  |  |
| TTY17A          |  | ZNF641  |  |  |

|          |  |         |  |  |
|----------|--|---------|--|--|
| TTYH2    |  | ZNF681  |  |  |
| TUB      |  | ZNF695  |  |  |
| TUBB8    |  | ZNF701  |  |  |
| TUBGCP3  |  | ZNF711  |  |  |
| TWIST2   |  | ZNF740  |  |  |
| TXNDC3   |  | ZNF761  |  |  |
| UBE2NL   |  | ZNF77   |  |  |
| UBE2QP2  |  | ZNF772  |  |  |
| UGT3A2   |  | ZNF775  |  |  |
| UGT8     |  | ZNF788  |  |  |
| ULBP1    |  | ZNF79   |  |  |
| ULBP2    |  | ZNF792  |  |  |
| UNC13A   |  | ZNF813  |  |  |
| UNC5B    |  | ZNF816A |  |  |
| UNG2     |  | ZNF827  |  |  |
| UPK2     |  | ZNF83   |  |  |
| UPK3B    |  | ZNRF3   |  |  |
| USP19    |  | ZRSR2   |  |  |
| USP28    |  | ZSCAN29 |  |  |
| USP45    |  | ZSWIM3  |  |  |
| USP54    |  | ZSWIM5  |  |  |
| VCX      |  | ZWINT   |  |  |
| VCX3A    |  |         |  |  |
| VCX-C    |  |         |  |  |
| VDAC2    |  |         |  |  |
| VGFB     |  |         |  |  |
| VGLL1    |  |         |  |  |
| VIPR2    |  |         |  |  |
| VIT      |  |         |  |  |
| VPS13B   |  |         |  |  |
| VTCN1    |  |         |  |  |
| VTI1A    |  |         |  |  |
| WASF1    |  |         |  |  |
| WDR17    |  |         |  |  |
| WFDC10B  |  |         |  |  |
| WFDC2    |  |         |  |  |
| WISP1    |  |         |  |  |
| WIZ      |  |         |  |  |
| WNT10A   |  |         |  |  |
| WNT11    |  |         |  |  |
| WNT4     |  |         |  |  |
| WNT6     |  |         |  |  |
| WWTR1    |  |         |  |  |
| XAGE2B   |  |         |  |  |
| XKR4     |  |         |  |  |
| XKR6     |  |         |  |  |
| XKRX     |  |         |  |  |
| YBX2     |  |         |  |  |
| YJEFN3   |  |         |  |  |
| YLPM1    |  |         |  |  |
| ZBBX     |  |         |  |  |
| ZBED2    |  |         |  |  |
| ZBTB7C   |  |         |  |  |
| ZC3H6    |  |         |  |  |
| ZC3H7B   |  |         |  |  |
| ZC3HAV1L |  |         |  |  |

|         |  |  |  |  |
|---------|--|--|--|--|
| ZCCHC10 |  |  |  |  |
| ZCCHC4  |  |  |  |  |
| ZDHHC15 |  |  |  |  |
| ZDHHC20 |  |  |  |  |
| ZFHX2   |  |  |  |  |
| ZFP2    |  |  |  |  |
| ZFP28   |  |  |  |  |
| ZFP42   |  |  |  |  |
| ZFP57   |  |  |  |  |
| ZFP62   |  |  |  |  |
| ZFP64   |  |  |  |  |
| ZFP92   |  |  |  |  |
| ZIC2    |  |  |  |  |
| ZIC3    |  |  |  |  |
| ZNF101  |  |  |  |  |
| ZNF124  |  |  |  |  |
| ZNF138  |  |  |  |  |
| ZNF154  |  |  |  |  |
| ZNF204  |  |  |  |  |
| ZNF215  |  |  |  |  |
| ZNF235  |  |  |  |  |
| ZNF236  |  |  |  |  |
| ZNF286A |  |  |  |  |
| ZNF292  |  |  |  |  |
| ZNF300  |  |  |  |  |
| ZNF321  |  |  |  |  |
| ZNF333  |  |  |  |  |
| ZNF345  |  |  |  |  |
| ZNF347  |  |  |  |  |
| ZNF354A |  |  |  |  |
| ZNF397  |  |  |  |  |
| ZNF404  |  |  |  |  |
| ZNF420  |  |  |  |  |
| ZNF423  |  |  |  |  |
| ZNF425  |  |  |  |  |
| ZNF429  |  |  |  |  |
| ZNF454  |  |  |  |  |
| ZNF469  |  |  |  |  |
| ZNF488  |  |  |  |  |
| ZNF519  |  |  |  |  |
| ZNF542  |  |  |  |  |
| ZNF551  |  |  |  |  |
| ZNF552  |  |  |  |  |
| ZNF567  |  |  |  |  |
| ZNF570  |  |  |  |  |
| ZNF585B |  |  |  |  |
| ZNF587  |  |  |  |  |
| ZNF599  |  |  |  |  |
| ZNF607  |  |  |  |  |
| ZNF610  |  |  |  |  |
| ZNF623  |  |  |  |  |
| ZNF625  |  |  |  |  |
| ZNF630  |  |  |  |  |
| ZNF646  |  |  |  |  |
| ZNF658  |  |  |  |  |
| ZNF660  |  |  |  |  |





| fetal_liver_expr<br>AND<br>phh_expr | hlc_expr<br>AND<br>fetal_liver_expr<br>AND<br>phh_expr |
|-------------------------------------|--------------------------------------------------------|
| A2M                                 | A1CF                                                   |
| AAA1                                | A2LD1                                                  |
| ABCA6                               | AAAS                                                   |
| ABCB1                               | AACS                                                   |
| ABCB11                              | AACSL                                                  |
| ABCC11                              | AADAC                                                  |
| ABCC6P2                             | AADACL1                                                |
| ABCG5                               | AADAT                                                  |
| ABCG8                               | AAGAB                                                  |
| ABHD14B                             | AAK1                                                   |
| ABLIM3                              | AAMP                                                   |
| ACADSB                              | AARS                                                   |
| ACMSD                               | AARS2                                                  |
| ACOT12                              | AARSD1                                                 |
| ACP5                                | AASDH                                                  |
| ACSM2A                              | AASDHPPT                                               |
| ACSM2B                              | AATF                                                   |
| ACSM5                               | AATK                                                   |
| ACVRL1                              | ABAT                                                   |
| ACY3                                | ABCA1                                                  |
| ADAMTSL3                            | ABCA3                                                  |
| ADH1C                               | ABCA5                                                  |
| ADH4                                | ABCA7                                                  |
| ADH6                                | ABCA8                                                  |
| ADORA3                              | ABCA9                                                  |
| ADRB2                               | ABCB10                                                 |
| AGTR1                               | ABCB4                                                  |
| AGXT                                | ABCB6                                                  |
| AGXT2                               | ABCB7                                                  |
| AGXT2L1                             | ABCB9                                                  |
| ALAS2                               | ABCC2                                                  |
| ALDH3B1                             | ABCC3                                                  |
| ALDOB                               | ABCC5                                                  |
| ALKBH3                              | ABCC6                                                  |
| ALPK1                               | ABCC6P1                                                |
| AMBP                                | ABCC9                                                  |
| AMICA1                              | ABCD1                                                  |
| ANGPTL3                             | ABCD3                                                  |
| ANGPTL6                             | ABCE1                                                  |
| ANXA10                              | ABCF1                                                  |
| ANXA13                              | ABCF2                                                  |
| AOC3                                | ABCF3                                                  |
| APCS                                | ABCG1                                                  |
| APOA5                               | ABHD10                                                 |
| APOC2                               | ABHD12                                                 |
| APOC4                               | ABHD14A                                                |
| APOH                                | ABHD15                                                 |
| AQP12A                              | ABHD2                                                  |
| ARG1                                | ABHD3                                                  |
| ARVCF                               | ABHD4                                                  |

|           |        |
|-----------|--------|
| ASB9      | ABHD5  |
| ASH1L     | ABHD6  |
| ASPA      | ABHD8  |
| ASPG      | ABI1   |
| ATF7IP    | ABI2   |
| ATP2B2    | ABL1   |
| AZGP1     | ABLIM1 |
| B3GAT1    | ABR    |
| BAAT      | ABT1   |
| BBOX1     | ABTB1  |
| BCL10     | ABTB2  |
| BCL2L10   | ACAA1  |
| BCL6B     | ACAA2  |
| BDH1      | ACACA  |
| BHMT      | ACACB  |
| BHMT2     | ACAD10 |
| BMX       | ACAD11 |
| BTBD11    | ACAD8  |
| BTBD16    | ACAD9  |
| BTN3A3    | ACADL  |
| BZW1      | ACADM  |
| C10orf11  | ACADS  |
| C10orf116 | ACADVL |
| C10orf68  | ACAP2  |
| C10orf72  | ACAT1  |
| C14orf105 | ACAT2  |
| C14orf68  | ACBD3  |
| C14orf73  | ACBD6  |
| C15orf52  | ACCS   |
| C16orf45  | ACD    |
| C16orf50  | ACE2   |
| C16orf73  | ACER2  |
| C19orf51  | ACHE   |
| C1orf168  | ACIN1  |
| C1orf51   | ACLY   |
| C1QB      | ACN9   |
| C1QC      | ACO1   |
| C1QL2     | ACO2   |
| C1R       | ACOT1  |
| C2        | ACOT11 |
| C20orf107 | ACOT2  |
| C20orf62  | ACOT4  |
| C21orf34  | ACOT7  |
| C22orf27  | ACOT8  |
| C2CD4B    | ACOT9  |
| C3        | ACOX1  |
| C3orf25   | ACOX2  |
| C3orf46   | ACOX3  |
| C3orf54   | ACP1   |
| C4BPA     | ACP2   |
| C4BPB     | ACP6   |
| C5orf43   | ACPL2  |
| C6        | ACSF2  |
| C6orf165  | ACSL1  |
| C7orf31   | ACSL3  |
| C7orf58   | ACSL5  |

|          |          |
|----------|----------|
| C8A      | ACSM3    |
| C8B      | ACSS2    |
| C8G      | ACSS3    |
| C8ORFK36 | ACTA2    |
| C9orf150 | ACTB     |
| C9orf24  | ACTG1    |
| CA12     | ACTL6A   |
| CA5A     | ACTN1    |
| CA9      | ACTN4    |
| CABP1    | ACTR10   |
| CACNA1S  | ACTR1A   |
| CACNA2D4 | ACTR1B   |
| CAMK1    | ACTR2    |
| CAMK1D   | ACTR3    |
| CASP1    | ACTR3B   |
| CCDC13   | ACTR5    |
| CCL14    | ACTR6    |
| CCL15    | ACTR8    |
| CCL16    | ACTRT1   |
| CCL20    | ACVR1    |
| CCL3     | ACVR1B   |
| CCL3L1   | ACVR2A   |
| CCL3L3   | ACVR2B   |
| CCL4L1   | ACY1     |
| CCL4L2   | ACYP1    |
| CD3EAP   | ACYP2    |
| CD7      | ADA      |
| CD93     | ADAL     |
| CDA      | ADAM10   |
| CDH20    | ADAM15   |
| CDH23    | ADAM17   |
| CDK5R2   | ADAM19   |
| CDYL2    | ADAM9    |
| CER1     | ADAMTS1  |
| CES8     | ADAMTSL2 |
| CFHR1    | ADAMTSL4 |
| CFHR2    | ADAMTSL5 |
| CFHR5    | ADAP2    |
| CLDN5    | ADAR     |
| CLEC14A  | ADARB1   |
| CLGN     | ADAT1    |
| CLRN3    | ADAT3    |
| CNGA1    | ADCK1    |
| COL27A1  | ADCK2    |
| COX6A2   | ADCK4    |
| COX7A1   | ADCK5    |
| CP       | ADCY6    |
| CPB2     | ADCY7    |
| CRP      | ADCY9    |
| CRYAA    | ADD1     |
| CRYBB2   | ADD3     |
| CRYGB    | ADH1A    |
| CTSF     | ADH5     |
| CTSS     | ADHFE1   |
| CUX2     | ADI1     |
| CXCL10   | ADIPOR1  |

|               |         |
|---------------|---------|
| CYP21A2       | ADIPOR2 |
| CYP2D6        | ADK     |
| CYP39A1       | ADM     |
| CYP3A43       | ADM2    |
| CYP3A5        | ADNP    |
| CYP4A11       | ADNP2   |
| CYP4A22       | ADO     |
| CYP4B1        | ADORA1  |
| CYP4F12       | ADPGK   |
| CYP4F2        | ADPRHL2 |
| CYP4F3        | ADRA1A  |
| CYP8B1        | ADRA1B  |
| DBH           | ADRA2A  |
| DDO           | ADRA2B  |
| DENND2D       | ADRBK1  |
| DEPDC7        | ADRM1   |
| DHODH         | ADSL    |
| DHRS9         | ADSS    |
| DHX58         | ADSSL1  |
| DKFZP564J102  | AEBP2   |
| DKFZp779M0652 | AEN     |
| DMGDH         | AES     |
| DNAJC12       | AFAP1L1 |
| DNMT3L        | AFF1    |
| DOCK10        | AFF4    |
| DOK1          | AFG3L1  |
| DPYD          | AFG3L2  |
| DPYSL5        | AFM     |
| DTX1          | AFMID   |
| DYRK3         | AFP     |
| EBI2          | AFTPH   |
| ECM2          | AGA     |
| ECSCR         | AGAP3   |
| EEPDI         | AGAP6   |
| EID3          | AGAP8   |
| ELAVL3        | AGBL5   |
| ENPP3         | AGFG1   |
| ENPP7         | AGFG2   |
| EPB41         | AGGF1   |
| EPC1          | AGK     |
| ESPNL         | AGL     |
| EVC2          | AGMAT   |
| EVI2B         | AGPAT1  |
| F11           | AGPAT2  |
| F13B          | AGPAT3  |
| F5            | AGPAT5  |
| F8            | AGPAT6  |
| F9            | AGPAT9  |
| FABP1         | AGPS    |
| FAM21B        | AGRN    |
| FAM21C        | AGT     |
| FAM47E        | AGTPBP1 |
| FAM50B        | AGTRAP  |
| FAM53A        | AGXT2L2 |
| FAM78A        | AHCTF1  |
| FBXL19        | AHCY    |

|          |          |
|----------|----------|
| FCER1G   | AHCYL1   |
| FCN3     | AHNAK    |
| FERMT3   | AHR      |
| FETUB    | AHSA1    |
| FIT1     | AHSA2    |
| FLJ20581 | AHSG     |
| FLJ35801 | AIDA     |
| FMO3     | AIF1     |
| FOLH1B   | AIF1L    |
| FPGS     | AIFM1    |
| FRAT1    | AIFM2    |
| FRK      | AIG1     |
| G6PC     | AIMP2    |
| GAS2     | AIP      |
| GBA3     | AIRE     |
| GC       | AJAP1    |
| GDPD4    | AK1      |
| GGT1     | AK2      |
| GGT2     | AK2P2    |
| GGT3P    | AK3      |
| GGTLC2   | AK3L1    |
| GIMAP2   | AKAP1    |
| GK       | AKAP11   |
| GLIPR1   | AKAP12   |
| GLTPD2   | AKAP13   |
| GLYAT    | AKAP7    |
| GLYATL1  | AKAP8    |
| GNA14    | AKAP8L   |
| GNAT1    | AKIRIN1  |
| GNMT     | AKIRIN2  |
| GPIHBP1  | AKNA     |
| GPLD1    | AKR1A1   |
| GPNMB    | AKR1B1   |
| GPR109B  | AKR1C2   |
| GPR112   | AKR1C3   |
| GPR116   | AKR1C4   |
| GPR146   | AKR1D1   |
| GPT      | AKR7A2   |
| GRAP     | AKR7A3   |
| GRRP1    | AKT1     |
| GSTT2    | AKT1S1   |
| GUCA2A   | AKTIP    |
| GYS2     | ALAD     |
| HAL      | ALAS1    |
| HAMP     | ALB      |
| HAO1     | ALCAM    |
| HAO2     | ALDH16A1 |
| HAS1     | ALDH18A1 |
| HCK      | ALDH1A1  |
| HCLS1    | ALDH1A2  |
| HES5     | ALDH1B1  |
| HFE2     | ALDH1L1  |
| HGD      | ALDH2    |
| HGFAC    | ALDH3A2  |
| HGSNAT   | ALDH4A1  |
| HHEX     | ALDH5A1  |

|           |          |
|-----------|----------|
| HIST1H2AE | ALDH6A1  |
| HIST1H2BJ | ALDH7A1  |
| HIST1H3H  | ALDH8A1  |
| HIST1H4J  | ALDH9A1  |
| HIST2H2AB | ALDOA    |
| HLA-DMB   | ALDOC    |
| HLF       | ALG1     |
| HMP19     | ALG11    |
| HNF4G     | ALG12    |
| HOXB1     | ALG13    |
| HP        | ALG14    |
| HPR       | ALG1L    |
| HRG       | ALG2     |
| HSD17B6   | ALG3     |
| HSFX1     | ALG5     |
| HULC      | ALG6     |
| ICAM2     | ALG8     |
| ICAM4     | ALG9     |
| IFI30     | ALKBH1   |
| IFI44     | ALKBH2   |
| IGFALS    | ALKBH4   |
| IKBKAP    | ALKBH5   |
| IL1B      | ALKBH6   |
| IL1RN     | ALKBH7   |
| IL22RA1   | ALOX15B  |
| IL6R      | ALOX5    |
| ING5      | ALOX5AP  |
| INHBB     | ALPL     |
| IRF2      | ALPP     |
| IRF5      | ALS2     |
| ITGAL     | ALS2CR14 |
| ITGB7     | ALS2CR4  |
| ITIH2     | ALX1     |
| ITIH3     | AMAC1L3  |
| ITIH4     | AMACR    |
| IYD       | AMD1     |
| JMJD2A    | AMDHD1   |
| JUNB      | AMDHD2   |
| KCNA6     | AMFR     |
| KENAE     | AMMECR1  |
| KGFLP1    | AMMECR1L |
| KIAA0776  | AMOT     |
| KIAA1324  | AMOTL2   |
| KIAA1881  | AMT      |
| KIAA1920  | AMY1A    |
| KIF12     | AMY1B    |
| KILLIN    | AMY1C    |
| KISS1     | AMY2A    |
| KLHL33    | AMZ2     |
| KLHL35    | ANAPC1   |
| KLKB1     | ANAPC10  |
| KMO       | ANAPC11  |
| KNG1      | ANAPC13  |
| KRT126P   | ANAPC4   |
| KRT222    | ANAPC5   |
| KRT24     | ANG      |

|              |                 |
|--------------|-----------------|
| KRT6B        | ANGEL1          |
| KRT75        | ANGEL2          |
| L3MBTL4      | ANGPTL4         |
| LAMA3        | ANKFY1          |
| LAPTM5       | ANKHD1          |
| LAT2         | ANKHD1-EIF4EBP3 |
| LBP          | ANKIB1          |
| LCN12        | ANKLE2          |
| LCN2         | ANKMY1          |
| LDB1         | ANKMY2          |
| LDHD         | ANKRA2          |
| LEAP-2       | ANKRD10         |
| LECT2        | ANKRD11         |
| LENG8        | ANKRD12         |
| LINCR        | ANKRD13A        |
| LMO7         | ANKRD13C        |
| LOC100128533 | ANKRD13D        |
| LOC100128657 | ANKRD16         |
| LOC100129076 | ANKRD17         |
| LOC100129191 | ANKRD20A1       |
| LOC100129445 | ANKRD22         |
| LOC100129463 | ANKRD23         |
| LOC100129887 | ANKRD24         |
| LOC100130111 | ANKRD26         |
| LOC100130179 | ANKRD27         |
| LOC100131061 | ANKRD28         |
| LOC100131223 | ANKRD30B        |
| LOC100131471 | ANKRD33         |
| LOC100131512 | ANKRD35         |
| LOC100131693 | ANKRD36B        |
| LOC100131733 | ANKRD37         |
| LOC100132289 | ANKRD38         |
| LOC100132346 | ANKRD39         |
| LOC100132364 | ANKRD40         |
| LOC100132553 | ANKRD43         |
| LOC100132560 | ANKRD44         |
| LOC100132771 | ANKRD46         |
| LOC100132938 | ANKRD47         |
| LOC100133511 | ANKRD49         |
| LOC100133551 | ANKRD50         |
| LOC100133913 | ANKRD54         |
| LOC100133972 | ANKRD57         |
| LOC100134152 | ANKRD6          |
| LOC100134266 | ANKRD9          |
| LOC147710    | ANKS1A          |
| LOC149351    | ANKS4B          |
| LOC283314    | ANKZF1          |
| LOC285095    | ANO1            |
| LOC285412    | ANO10           |
| LOC286310    | ANO6            |
| LOC339782    | ANO8            |
| LOC387647    | ANP32A          |
| LOC387686    | ANP32B          |
| LOC388237    | ANP32C          |
| LOC389523    | ANP32E          |
| LOC391352    | ANPEP           |

|           |          |
|-----------|----------|
| LOC392221 | ANTXR2   |
| LOC392288 | ANXA1    |
| LOC400163 | ANXA11   |
| LOC440059 | ANXA2    |
| LOC440080 | ANXA2P1  |
| LOC440313 | ANXA2P2  |
| LOC440503 | ANXA2P3  |
| LOC441179 | ANXA3    |
| LOC441488 | ANXA4    |
| LOC441714 | ANXA5    |
| LOC442609 | ANXA6    |
| LOC493754 | ANXA7    |
| LOC54103  | ANXA9    |
| LOC553137 | AOF2     |
| LOC554235 | AP1B1    |
| LOC55908  | AP1G1    |
| LOC641825 | AP1G2    |
| LOC641941 | AP1M1    |
| LOC641942 | AP1S1    |
| LOC642252 | AP1S2    |
| LOC642282 | AP2A1    |
| LOC642399 | AP2A2    |
| LOC642812 | AP2B1    |
| LOC643047 | AP2M1    |
| LOC643145 | AP2S1    |
| LOC643669 | AP3B1    |
| LOC643912 | AP3D1    |
| LOC643932 | AP3M1    |
| LOC643933 | AP3S1    |
| LOC644334 | AP3S2    |
| LOC644584 | AP4B1    |
| LOC645084 | AP4E1    |
| LOC645118 | APAF1    |
| LOC645128 | APBA2BP  |
| LOC645133 | APBA3    |
| LOC645217 | APBB1IP  |
| LOC645276 | APBB3    |
| LOC645284 | APEH     |
| LOC645600 | APEX1    |
| LOC645897 | APEX2    |
| LOC646089 | APH1A    |
| LOC646282 | APH1B    |
| LOC646330 | API5     |
| LOC646452 | APIP     |
| LOC646675 | APITD1   |
| LOC646845 | APLP2    |
| LOC647089 | APOA1    |
| LOC647108 | APOA1BP  |
| LOC647588 | APOA2    |
| LOC647786 | APOA4    |
| LOC648213 | APOB     |
| LOC648982 | APOBEC3B |
| LOC649396 | APOBEC3C |
| LOC649497 | APOBEC3F |
| LOC649604 | APOBEC3G |
| LOC649917 | APOC1    |



|           |           |
|-----------|-----------|
| LOC650251 | APOC3     |
| LOC650491 | APOE      |
| LOC650538 | APOF      |
| LOC650681 | APOL2     |
| LOC651333 | APOL3     |
| LOC651511 | APOM      |
| LOC651659 | APOO      |
| LOC651979 | APOOL     |
| LOC652045 | APP       |
| LOC652673 | APPBP2    |
| LOC652773 | APPL1     |
| LOC652819 | APPL2     |
| LOC653066 | APRT      |
| LOC653073 | APTX      |
| LOC653270 | AQP11     |
| LOC653458 | AQP12B    |
| LOC653463 | AQP3      |
| LOC653498 | AQP7P1    |
| LOC653609 | AQP7P2    |
| LOC653610 | AQR       |
| LOC653879 | AR        |
| LOC653968 | ARAF      |
| LOC654042 | ARAP1     |
| LOC654096 | ARAP3     |
| LOC654116 | ARCN1     |
| LOC654164 | ARD1A     |
| LOC727753 | ARF1      |
| LOC727768 | ARF3      |
| LOC727869 | ARF4      |
| LOC727908 | ARF5      |
| LOC728288 | ARF6      |
| LOC728290 | ARFGAP1   |
| LOC728441 | ARFGAP2   |
| LOC728835 | ARFGAP3   |
| LOC729905 | ARFGEF1   |
| LOC730102 | ARFIP1    |
| LOC730243 | ARG2      |
| LOC730805 | ARGLU1    |
| LOC731074 | ARHGAP1   |
| LOC731656 | ARHGAP10  |
| LOC731969 | ARHGAP11A |
| LOC85389  | ARHGAP12  |
| LOC85390  | ARHGAP17  |
| LOC90925  | ARHGAP19  |
| LONRF3    | ARHGAP21  |
| LPA       | ARHGAP23  |
| LPPR1     | ARHGAP24  |
| LRRC31    | ARHGAP30  |
| LRRK2     | ARHGAP4   |
| LY96      | ARHGAP9   |
| LYPD2     | ARHGDIA   |
| LYPLA2P1  | ARHGDIB   |
| LYZ       | ARHGEF1   |
| MALL      | ARHGEF10  |
| MAMLD1    | ARHGEF10L |
| MAOB      | ARHGEF11  |

|           |          |
|-----------|----------|
| MAP1D     | ARHGEF12 |
| MAP3K5    | ARHGEF18 |
| MAP3K7IP3 | ARHGEF19 |
| MAPK11    | ARHGEF2  |
| MARCH8    | ARHGEF5  |
| MASP2     | ARHGEF5L |
| MAST4     | ARHGEF6  |
| MAT1A     | ARHGEF7  |
| MBL2      | ARID1A   |
| MCCC2     | ARID2    |
| MEG3      | ARID3A   |
| MIR1224   | ARID3B   |
| MIR1267   | ARID4A   |
| MIR330    | ARID4B   |
| MLKL      | ARID5B   |
| MLLT3     | ARIH1    |
| MLN       | ARIH2    |
| MOGAT3    | ARL1     |
| MPL       | ARL15    |
| MPV17L    | ARL16    |
| MR1       | ARL17B   |
| MRGPRF    | ARL2     |
| MS4A6A    | ARL2BP   |
| MSTP9     | ARL3     |
| MT1M      | ARL4A    |
| MTM       | ARL4D    |
| MUPCDH    | ARL5A    |
| MYH14     | ARL5B    |
| MYRIP     | ARL6IP1  |
| NAGS      | ARL6IP4  |
| NALCN     | ARL6IP5  |
| NAT8      | ARL6IP6  |
| NCF1      | ARL8B    |
| NCKAP5    | ARMC1    |
| NDUFC2    | ARMC10   |
| NFASC     | ARMC5    |
| NFIA      | ARMC6    |
| NFIC      | ARMC7    |
| NFIX      | ARMC8    |
| NFS1      | ARMCX3   |
| NINJ2     | ARMCX5   |
| NLF2      | ARMCX6   |
| NMNAT3    | ARMET    |
| NPC1L1    | ARNT     |
| NPL       | ARNTL    |
| NPR3      | ARPC1A   |
| NR0B2     | ARPC1B   |
| NR1H4     | ARPC2    |
| NR1I2     | ARPC3    |
| NR1I3     | ARPC4    |
| NRTN      | ARPC5    |
| NT5E      | ARPC5L   |
| NTN4      | ARPM1    |
| NUDT16P   | ARPP19   |
| NXF3      | ARRB1    |
| OBP2B     | ARRDC2   |

|          |          |
|----------|----------|
| ONECUT1  | ARRDC3   |
| ONECUT2  | ARRDC4   |
| OR2W5    | ARS2     |
| OR52N2   | ARSA     |
| ORM1     | ARSB     |
| ORM2     | ARSD     |
| OSGIN1   | ARSE     |
| OSTbeta  | ARSG     |
| OTC      | ART1     |
| OXER1    | ART4     |
| OXT      | ARV1     |
| P2RX7    | ARVP6125 |
| PACRG    | AS3MT    |
| PAQR9    | ASAH1    |
| PCAF     | ASAH2C   |
| PCDH20   | ASAP1    |
| PCDH24   | ASAP2    |
| PCDHAC2  | ASAP3    |
| PCDHGB3  | ASB1     |
| PCGF3    | ASB13    |
| PCGF5    | ASB3     |
| PCSK9    | ASB6     |
| PDE12    | ASB7     |
| PDE3B    | ASB8     |
| PECAM1   | ASCC1    |
| PFKFB1   | ASCC2    |
| PGBD5    | ASCC3    |
| PGLYRP2  | ASF1A    |
| PHACS    | ASF1B    |
| PIGB     | ASGR1    |
| PIK3AP1  | ASGR2    |
| PIK3C2G  | ASH2L    |
| PION     | ASL      |
| PIPOX    | ASMTL    |
| PKLR     | ASNA1    |
| PLA1A    | ASNS     |
| PLA2G1B  | ASNSD1   |
| PLA2G4C  | ASPM     |
| PLEK     | ASPSCR1  |
| PLEKHG1  | ASS1     |
| PLG      | ASTE1    |
| PLGLB1   | ASTN2    |
| PLGLB2   | ASXL1    |
| PM20D1   | ASXL2    |
| PMCHL1   | ATAD1    |
| PNMA3    | ATAD2    |
| PNMA6A   | ATAD2B   |
| POLR1A   | ATAD3A   |
| PON1     | ATE1     |
| PON3     | ATF1     |
| PPID     | ATF2     |
| PPIF     | ATF3     |
| PRAMEF17 | ATF4     |
| PRAP1    | ATF5     |
| PRG2     | ATF6     |
| PRG4     | ATF6B    |

|          |          |
|----------|----------|
| PRIM2    | ATF7IP2  |
| PRKAR1B  | ATG10    |
| PROC     | ATG12    |
| PRODH2   | ATG16L1  |
| PROP1    | ATG16L2  |
| PROZ     | ATG2A    |
| PRR22    | ATG3     |
| PRR7     | ATG4A    |
| PRSS3    | ATG4B    |
| PRSS42   | ATG4C    |
| PRTN3    | ATG4D    |
| PSG9     | ATG5     |
| PSMB9    | ATG7     |
| PTGER4   | ATG9A    |
| PTHLH    | ATIC     |
| PTPRH    | ATL1     |
| PYCRL    | ATL2     |
| RAB26    | ATL3     |
| RAB7B    | ATM      |
| RAB7L1   | ATMIN    |
| RAI2     | ATN1     |
| RAMP1    | ATOX1    |
| RASGRP3  | ATP10A   |
| RBM43    | ATP11B   |
| RCP9     | ATP11C   |
| RET      | ATP13A1  |
| RGR      | ATP13A2  |
| RGS1     | ATP1A1   |
| RGS14    | ATP1A3   |
| RGS3     | ATP1B1   |
| RILP     | ATP1B3   |
| RINL     | ATP2A2   |
| RNF126P1 | ATP2B1   |
| RNF207   | ATP2B4   |
| RNU86    | ATP2C1   |
| RORC     | ATP5A1   |
| RPL22L1  | ATP5B    |
| RSPH10B  | ATP5C1   |
| RTN1     | ATP5D    |
| RTN4RL1  | ATP5E    |
| RTP2     | ATP5EP2  |
| RTP3     | ATP5F1   |
| RUNDC3B  | ATP5G1   |
| S1PR1    | ATP5G2   |
| SAA4     | ATP5G3   |
| SAMD5    | ATP5H    |
| SAMD9    | ATP5I    |
| SARDH    | ATP5J    |
| SARM1    | ATP5J2   |
| SCARNA17 | ATP5L    |
| SCARNA7  | ATP5O    |
| SCARNA9L | ATP5S    |
| SCGN     | ATP5SL   |
| SCN9A    | ATP6AP1  |
| SDCBP2   | ATP6AP2  |
| SDR42E1  | ATP6V0A1 |

|           |          |
|-----------|----------|
| SEC14L4   | ATP6V0A2 |
| SERPINA11 | ATP6V0B  |
| SERPINA4  | ATP6V0C  |
| SERPINA6  | ATP6V0D1 |
| SERPINA7  | ATP6V0E1 |
| SERPIND1  | ATP6V0E2 |
| SHE       | ATP6V1A  |
| SHISA4    | ATP6V1B2 |
| SIGLEC14  | ATP6V1C1 |
| SKAP1     | ATP6V1D  |
| SLAMF9    | ATP6V1E1 |
| SLC16A13  | ATP6V1F  |
| SLC17A1   | ATP6V1G1 |
| SLC17A2   | ATP6V1H  |
| SLC17A3   | ATP7B    |
| SLC17A4   | ATP8B2   |
| SLC17A9   | ATP8B4   |
| SLC1A2    | ATP9A    |
| SLC22A20  | ATP9B    |
| SLC22A25  | ATPAF1   |
| SLC22A3   | ATPAF2   |
| SLC22A9   | ATPBD1B  |
| SLC2A2    | ATPBD3   |
| SLC2A6    | ATPBD4   |
| SLC2A9    | ATPIF1   |
| SLC30A10  | ATRIP    |
| SLC38A3   | ATRN     |
| SLC38A4   | ATXN1    |
| SLC3A1    | ATXN10   |
| SLC46A1   | ATXN1L   |
| SLC6A1    | ATXN2    |
| SLCO1B3   | ATXN3    |
| SMOC1     | ATXN7L2  |
| SNHG10    | ATXN7L3  |
| SNORD100  | AUH      |
| SNORD16   | AUP1     |
| SNORD32A  | AURKAIP1 |
| SNORD56   | AUTS2    |
| SNORD96A  | AVEN     |
| SNX15     | AVL9     |
| SOBP      | AVP      |
| SP100     | AVPI1    |
| SPAG4L    | AVPR2    |
| SPIC      | AXIN1    |
| SPON2     | AXIN2    |
| SPP2      | AXL      |
| SQRDL     | AXUD1    |
| SRGN      | AYP1p1   |
| SSX4      | AZI1     |
| STX11     | AZI2     |
| SULT1E1   | AZIN1    |
| SYTL4     | B2M      |
| TAAR1     | B3GALT6  |
| TAF8      | B3GAT3   |
| TAF9L     | B3GNT1   |
| TAPBPL    | B3GNT2   |

|          |          |
|----------|----------|
| TAT      | B3Gn-T6  |
| TBX10    | B3GNT6   |
| TBXAS1   | B4GALT1  |
| TCF1     | B4GALT2  |
| TCF7     | B4GALT3  |
| TCP11L2  | B4GALT4  |
| TDRD6    | B4GALT5  |
| TENC1    | B4GALT7  |
| TEPP     | B9D1     |
| TESC     | B9D2     |
| TFF3     | BACE1    |
| TFR2     | BACE2    |
| THEM4    | BAD      |
| THG1L    | BAG2     |
| THPO     | BAG3     |
| TIMM17A  | BAG4     |
| TLE6     | BAG5     |
| TLR8     | BAHD1    |
| TMED6    | BAIAP2   |
| TMEM110  | BAIAP2L1 |
| TMEM139  | BAIAP2L2 |
| TMEM151  | BAMBI    |
| TMEM176B | BANF1    |
| TMEM195  | BANP     |
| TMEM220  | BAP1     |
| TMEM233  | BASP1    |
| TMEM82   | BAT1     |
| TNFRSF14 | BAT2     |
| TNFSF11  | BAT2D1   |
| TNRC9    | BAT2L    |
| TNXA     | BAT3     |
| TOR2A    | BAT4     |
| TOX3     | BAT5     |
| TREML1   | BAX      |
| TRIM10   | BAZ1A    |
| TRIM15   | BAZ1B    |
| TRIM47   | BAZ2B    |
| TRIM73   | BBC3     |
| TRPS1    | BBS1     |
| T-SP1    | BBS10    |
| TSPAN8   | BBS2     |
| TUBA3E   | BBS4     |
| TUBA4A   | BBS7     |
| TXNL4A   | BBS9     |
| TYMP     | BBX      |
| TYROBP   | BCAN     |
| UFD1L    | BCAP29   |
| UGT2A3   | BCAP31   |
| UGT2B10  | BCAR1    |
| UGT2B15  | BCAR3    |
| UGT2B17  | BCAS2    |
| UGT2B4   | BCAS4    |
| UPB1     | BCAT2    |
| UROC1    | BCCIP    |
| USH2A    | BCDIN3D  |
| VCX2     | BCHE     |

|         |         |
|---------|---------|
| VMD2L3  | BCKDHA  |
| VNN1    | BCKDHB  |
| VNN3    | BCKDK   |
| VOPP1   | BCL2L1  |
| VPREB3  | BCL2L11 |
| VSIG4   | BCL2L12 |
| VSNL1   | BCL2L13 |
| WARS2   | BCL2L2  |
| ZDHHC19 | BCL3    |
| ZFAT    | BCL6    |
| ZFP3    | BCL7A   |
| ZIM2    | BCL7B   |
| ZMYND12 | BCL7C   |
| ZMYND15 | BCL9    |
| ZNF385B | BCL9L   |
| ZNF516  | BCLAF1  |
| ZNF533  | BCOR    |
| ZNF541  | BCORL1  |
| ZNF584  | BCR     |
| ZNF713  | BCS1L   |
| ZNF844  | BCYRN1  |
|         | BDNF    |
|         | BECN1   |
|         | BEGAIN  |
|         | BEND3   |
|         | BEND7   |
|         | BET1    |
|         | BET1L   |
|         | BEX1    |
|         | BEX2    |
|         | BEXL1   |
|         | BFAR    |
|         | BGLAP   |
|         | BGN     |
|         | BHLHB2  |
|         | BHLHB9  |
|         | BICD2   |
|         | BID     |
|         | BIN1    |
|         | BIN3    |
|         | BIRC2   |
|         | BIRC3   |
|         | BIRC6   |
|         | BIVM    |
|         | BLCAP   |
|         | BLMH    |
|         | BLOC1S1 |
|         | BLVRA   |
|         | BLVRB   |
|         | BLZF1   |
|         | BMF     |
|         | BMI1    |
|         | BMP1    |
|         | BMP2    |
|         | BMP2K   |
|         | BMP4    |

|  |        |
|--|--------|
|  | BMP8B  |
|  | BMPR1A |
|  | BMPR2  |
|  | BMS1   |
|  | BMS1P5 |
|  | BNIP1  |
|  | BNIP2  |
|  | BNIP3  |
|  | BNIP3L |
|  | BOAT   |
|  | BOK    |
|  | BOLA1  |
|  | BOLA2  |
|  | BOLA3  |
|  | BOP1   |
|  | BP75   |
|  | BPGM   |
|  | BPHL   |
|  | BPNT1  |
|  | BRCA1  |
|  | BRCC3  |
|  | BRD1   |
|  | BRD2   |
|  | BRD3   |
|  | BRD4   |
|  | BRD7   |
|  | BRD7P2 |
|  | BRD8   |
|  | BRD9   |
|  | BRE    |
|  | BRF1   |
|  | BRF2   |
|  | BRI3   |
|  | BRI3BP |
|  | BRI3P1 |
|  | BRIX1  |
|  | BRMS1  |
|  | BRMS1L |
|  | BRP44  |
|  | BRP44L |
|  | BRPF1  |
|  | BRPF3  |
|  | BRSK2  |
|  | BRWD1  |
|  | BRWD2  |
|  | BSCL2  |
|  | BSDC1  |
|  | BSG    |
|  | BST2   |
|  | BTAF1  |
|  | BTBD1  |
|  | BTBD10 |
|  | BTBD12 |
|  | BTBD15 |
|  | BTBD2  |
|  | BTBD3  |



|  |           |
|--|-----------|
|  | BTBD6     |
|  | BTBD7     |
|  | BTD       |
|  | BTF3      |
|  | BTF3L4    |
|  | BTG1      |
|  | BTG2      |
|  | BTG3      |
|  | BTN2A1    |
|  | BTN3A1    |
|  | BTN3A2    |
|  | BUB3      |
|  | BUD13     |
|  | BUD31     |
|  | BYSL      |
|  | BZW2      |
|  | C10orf10  |
|  | C10orf104 |
|  | C10orf114 |
|  | C10orf118 |
|  | C10orf119 |
|  | C10orf12  |
|  | C10orf125 |
|  | C10orf137 |
|  | C10orf140 |
|  | C10orf2   |
|  | C10orf26  |
|  | C10orf28  |
|  | C10orf32  |
|  | C10orf35  |
|  | C10orf4   |
|  | C10orf47  |
|  | C10orf54  |
|  | C10orf57  |
|  | C10orf58  |
|  | C10orf59  |
|  | C10orf6   |
|  | C10orf61  |
|  | C10orf65  |
|  | C10orf75  |
|  | C10orf76  |
|  | C10orf84  |
|  | C11orf1   |
|  | C11orf10  |
|  | C11orf17  |
|  | C11orf2   |
|  | C11orf24  |
|  | C11orf35  |
|  | C11orf46  |
|  | C11orf48  |
|  | C11orf49  |
|  | C11orf51  |
|  | C11orf52  |
|  | C11orf54  |
|  | C11orf57  |
|  | C11orf58  |

|  |           |
|--|-----------|
|  | C11orf59  |
|  | C11orf60  |
|  | C11orf63  |
|  | C11orf67  |
|  | C11orf68  |
|  | C11orf71  |
|  | C11orf73  |
|  | C11orf74  |
|  | C11orf75  |
|  | C11orf80  |
|  | C11orf83  |
|  | C11orf9   |
|  | C12orf10  |
|  | C12orf11  |
|  | C12orf23  |
|  | C12orf24  |
|  | C12orf26  |
|  | C12orf27  |
|  | C12orf29  |
|  | C12orf30  |
|  | C12orf31  |
|  | C12orf32  |
|  | C12orf35  |
|  | C12orf4   |
|  | C12orf41  |
|  | C12orf43  |
|  | C12orf44  |
|  | C12orf45  |
|  | C12orf47  |
|  | C12orf51  |
|  | C12orf52  |
|  | C12orf57  |
|  | C12orf62  |
|  | C12orf65  |
|  | C12orf66  |
|  | C12orf76  |
|  | C12orf77  |
|  | C13orf1   |
|  | C13orf15  |
|  | C13orf23  |
|  | C13orf25  |
|  | C13orf27  |
|  | C13orf37  |
|  | C13orf7   |
|  | C14orf100 |
|  | C14orf102 |
|  | C14orf104 |
|  | C14orf106 |
|  | C14orf109 |
|  | C14orf112 |
|  | C14orf124 |
|  | C14orf129 |
|  | C14orf131 |
|  | C14orf132 |
|  | C14orf133 |
|  | C14orf135 |

|  |           |
|--|-----------|
|  | C14orf138 |
|  | C14orf139 |
|  | C14orf142 |
|  | C14orf143 |
|  | C14orf147 |
|  | C14orf149 |
|  | C14orf153 |
|  | C14orf156 |
|  | C14orf159 |
|  | C14orf166 |
|  | C14orf167 |
|  | C14orf169 |
|  | C14orf173 |
|  | C14orf174 |
|  | C14orf179 |
|  | C14orf2   |
|  | C14orf28  |
|  | C14orf32  |
|  | C14orf4   |
|  | C14orf43  |
|  | C14orf45  |
|  | C14orf79  |
|  | C14orf80  |
|  | C14orf82  |
|  | C14orf85  |
|  | C14orf93  |
|  | C15orf17  |
|  | C15orf23  |
|  | C15orf24  |
|  | C15orf29  |
|  | C15orf38  |
|  | C15orf39  |
|  | C15orf40  |
|  | C15orf41  |
|  | C15orf44  |
|  | C15orf57  |
|  | C15orf63  |
|  | C16orf13  |
|  | C16orf33  |
|  | C16orf35  |
|  | C16orf42  |
|  | C16orf48  |
|  | C16orf5   |
|  | C16orf52  |
|  | C16orf53  |
|  | C16orf56  |
|  | C16orf57  |
|  | C16orf58  |
|  | C16orf59  |
|  | C16orf61  |
|  | C16orf63  |
|  | C16orf68  |
|  | C16orf7   |
|  | C16orf70  |
|  | C16orf72  |
|  | C16orf75  |

|  |           |
|--|-----------|
|  | C16orf80  |
|  | C16orf86  |
|  | C16orf87  |
|  | C16orf91  |
|  | C16orf93  |
|  | C17orf100 |
|  | C17orf101 |
|  | C17orf106 |
|  | C17orf28  |
|  | C17orf37  |
|  | C17orf39  |
|  | C17orf42  |
|  | C17orf45  |
|  | C17orf48  |
|  | C17orf49  |
|  | C17orf51  |
|  | C17orf53  |
|  | C17orf56  |
|  | C17orf58  |
|  | C17orf59  |
|  | C17orf61  |
|  | C17orf62  |
|  | C17orf63  |
|  | C17orf68  |
|  | C17orf70  |
|  | C17orf71  |
|  | C17orf74  |
|  | C17orf79  |
|  | C17orf81  |
|  | C17orf85  |
|  | C17orf88  |
|  | C17orf89  |
|  | C17orf90  |
|  | C17orf91  |
|  | C17orf95  |
|  | C17orf96  |
|  | C17orf97  |
|  | C18orf10  |
|  | C18orf18  |
|  | C18orf19  |
|  | C18orf21  |
|  | C18orf22  |
|  | C18orf25  |
|  | C18orf32  |
|  | C18orf55  |
|  | C18orf56  |
|  | C18orf8   |
|  | C19orf10  |
|  | C19orf12  |
|  | C19orf2   |
|  | C19orf20  |
|  | C19orf22  |
|  | C19orf24  |
|  | C19orf25  |
|  | C19orf28  |
|  | C19orf29  |

|  |           |
|--|-----------|
|  | C19orf30  |
|  | C19orf31  |
|  | C19orf40  |
|  | C19orf42  |
|  | C19orf43  |
|  | C19orf44  |
|  | C19orf46  |
|  | C19orf47  |
|  | C19orf48  |
|  | C19orf50  |
|  | C19orf52  |
|  | C19orf53  |
|  | C19orf54  |
|  | C19orf56  |
|  | C19orf6   |
|  | C19orf60  |
|  | C19orf61  |
|  | C19orf62  |
|  | C19orf63  |
|  | C19orf64  |
|  | C19orf66  |
|  | C19orf70  |
|  | C1D       |
|  | C1GALT1   |
|  | C1GALT1C1 |
|  | C1orf104  |
|  | C1orf107  |
|  | C1orf109  |
|  | C1orf112  |
|  | C1orf115  |
|  | C1orf122  |
|  | C1orf123  |
|  | C1orf124  |
|  | C1orf128  |
|  | C1orf130  |
|  | C1orf131  |
|  | C1orf144  |
|  | C1orf149  |
|  | C1orf151  |
|  | C1orf159  |
|  | C1orf162  |
|  | C1orf163  |
|  | C1orf166  |
|  | C1orf172  |
|  | C1orf174  |
|  | C1orf177  |
|  | C1orf188  |
|  | C1orf19   |
|  | C1orf198  |
|  | C1orf201  |
|  | C1orf203  |
|  | C1orf210  |
|  | C1orf212  |
|  | C1orf216  |
|  | C1orf218  |
|  | C1orf25   |

|  |           |
|--|-----------|
|  | C1orf31   |
|  | C1orf35   |
|  | C1orf41   |
|  | C1orf43   |
|  | C1orf50   |
|  | C1orf52   |
|  | C1orf53   |
|  | C1orf54   |
|  | C1orf55   |
|  | C1orf56   |
|  | C1orf57   |
|  | C1orf63   |
|  | C1orf66   |
|  | C1orf69   |
|  | C1orf71   |
|  | C1orf74   |
|  | C1orf77   |
|  | C1orf83   |
|  | C1orf85   |
|  | C1orf86   |
|  | C1orf9    |
|  | C1orf91   |
|  | C1orf93   |
|  | C1orf97   |
|  | C1QA      |
|  | C1QBP     |
|  | C1QTNF6   |
|  | C1RL      |
|  | C1S       |
|  | C20orf100 |
|  | C20orf108 |
|  | C20orf11  |
|  | C20orf111 |
|  | C20orf127 |
|  | C20orf177 |
|  | C20orf191 |
|  | C20orf199 |
|  | C20orf20  |
|  | C20orf24  |
|  | C20orf27  |
|  | C20orf29  |
|  | C20orf3   |
|  | C20orf30  |
|  | C20orf4   |
|  | C20orf43  |
|  | C20orf45  |
|  | C20orf46  |
|  | C20orf52  |
|  | C20orf55  |
|  | C20orf56  |
|  | C20orf7   |
|  | C20orf72  |
|  | C21orf119 |
|  | C21orf124 |
|  | C21orf126 |
|  | C21orf2   |

|  |          |
|--|----------|
|  | C21orf24 |
|  | C21orf30 |
|  | C21orf33 |
|  | C21orf37 |
|  | C21orf45 |
|  | C21orf51 |
|  | C21orf55 |
|  | C21orf57 |
|  | C21orf58 |
|  | C21orf59 |
|  | C21orf66 |
|  | C21orf7  |
|  | C21orf70 |
|  | C21orf91 |
|  | C22orf13 |
|  | C22orf25 |
|  | C22orf28 |
|  | C22orf29 |
|  | C22orf30 |
|  | C22orf32 |
|  | C22orf36 |
|  | C22orf39 |
|  | C22orf40 |
|  | C22orf9  |
|  | C2CD2    |
|  | C2orf18  |
|  | C2orf24  |
|  | C2orf25  |
|  | C2orf28  |
|  | C2orf29  |
|  | C2orf30  |
|  | C2orf34  |
|  | C2orf42  |
|  | C2orf43  |
|  | C2orf44  |
|  | C2orf47  |
|  | C2orf49  |
|  | C2orf56  |
|  | C2orf64  |
|  | C2orf68  |
|  | C2orf69  |
|  | C2orf7   |
|  | C2orf76  |
|  | C2orf79  |
|  | C2orf82  |
|  | C3orf1   |
|  | C3orf10  |
|  | C3orf14  |
|  | C3orf17  |
|  | C3orf19  |
|  | C3orf21  |
|  | C3orf23  |
|  | C3orf26  |
|  | C3orf31  |
|  | C3orf34  |
|  | C3orf36  |

|  |          |
|--|----------|
|  | C3orf37  |
|  | C3orf38  |
|  | C3orf39  |
|  | C3orf50  |
|  | C3orf58  |
|  | C3orf59  |
|  | C3orf60  |
|  | C3orf63  |
|  | C3orf64  |
|  | C3orf75  |
|  | C4orf14  |
|  | C4orf19  |
|  | C4orf23  |
|  | C4orf27  |
|  | C4orf32  |
|  | C4orf33  |
|  | C4orf34  |
|  | C4orf41  |
|  | C4orf46  |
|  | C4orf48  |
|  | C5       |
|  | C5orf13  |
|  | C5orf15  |
|  | C5orf21  |
|  | C5orf22  |
|  | C5orf24  |
|  | C5orf25  |
|  | C5orf28  |
|  | C5orf30  |
|  | C5orf32  |
|  | C5orf33  |
|  | C5orf35  |
|  | C5orf37  |
|  | C5orf4   |
|  | C5orf41  |
|  | C5orf44  |
|  | C5orf5   |
|  | C5orf51  |
|  | C6orf106 |
|  | C6orf108 |
|  | C6orf111 |
|  | C6orf115 |
|  | C6orf120 |
|  | C6orf125 |
|  | C6orf129 |
|  | C6orf130 |
|  | C6orf136 |
|  | C6orf138 |
|  | C6orf145 |
|  | C6orf153 |
|  | C6orf160 |
|  | C6orf162 |
|  | C6orf170 |
|  | C6orf173 |
|  | C6orf192 |
|  | C6orf203 |



|  |          |
|--|----------|
|  | C6orf211 |
|  | C6orf225 |
|  | C6orf47  |
|  | C6orf48  |
|  | C6orf57  |
|  | C6orf61  |
|  | C6orf62  |
|  | C6orf64  |
|  | C6orf66  |
|  | C6orf70  |
|  | C6orf72  |
|  | C6orf85  |
|  | C6orf89  |
|  | C7orf10  |
|  | C7orf11  |
|  | C7orf20  |
|  | C7orf23  |
|  | C7orf25  |
|  | C7orf26  |
|  | C7orf27  |
|  | C7orf28A |
|  | C7orf28B |
|  | C7orf29  |
|  | C7orf30  |
|  | C7orf36  |
|  | C7orf38  |
|  | C7orf40  |
|  | C7orf41  |
|  | C7orf42  |
|  | C7orf43  |
|  | C7orf44  |
|  | C7orf47  |
|  | C7orf49  |
|  | C7orf50  |
|  | C7orf54  |
|  | C7orf55  |
|  | C7orf59  |
|  | C7orf63  |
|  | C7orf68  |
|  | C7orf70  |
|  | C8orf33  |
|  | C8orf37  |
|  | C8orf38  |
|  | C8orf4   |
|  | C8orf40  |
|  | C8orf41  |
|  | C8orf42  |
|  | C8orf45  |
|  | C8orf47  |
|  | C8orf48  |
|  | C8orf55  |
|  | C8orf59  |
|  | C8orf76  |
|  | C8orf83  |
|  | C9orf102 |
|  | C9orf103 |

|  |           |
|--|-----------|
|  | C9orf100S |
|  | C9orf114  |
|  | C9orf116  |
|  | C9orf119  |
|  | C9orf123  |
|  | C9orf127  |
|  | C9orf130  |
|  | C9orf142  |
|  | C9orf156  |
|  | C9orf16   |
|  | C9orf169  |
|  | C9orf21   |
|  | C9orf23   |
|  | C9orf25   |
|  | C9orf3    |
|  | C9orf30   |
|  | C9orf37   |
|  | C9orf40   |
|  | C9orf45   |
|  | C9orf46   |
|  | C9orf5    |
|  | C9orf6    |
|  | C9orf64   |
|  | C9orf69   |
|  | C9orf7    |
|  | C9orf72   |
|  | C9orf75   |
|  | C9orf78   |
|  | C9orf80   |
|  | C9orf82   |
|  | C9orf85   |
|  | C9orf86   |
|  | C9orf89   |
|  | C9orf9    |
|  | C9orf90   |
|  | C9orf91   |
|  | C9orf95   |
|  | CA13      |
|  | CA2       |
|  | CA4       |
|  | CA5B      |
|  | CAB39     |
|  | CAB39L    |
|  | CABC1     |
|  | CABIN1    |
|  | CABLES1   |
|  | CABLES2   |
|  | CACHD1    |
|  | CACNA1H   |
|  | CACNG1    |
|  | CACYBP    |
|  | CAD       |
|  | CADM1     |
|  | CADM4     |
|  | CADPS2    |
|  | CALB2     |

|  |           |
|--|-----------|
|  | CALCOCO1  |
|  | CALCOCO2  |
|  | CALD1     |
|  | CALHM2    |
|  | CALM1     |
|  | CALM2     |
|  | CALM3     |
|  | CALML4    |
|  | CALN1     |
|  | CALR      |
|  | CALU      |
|  | CAMK2G    |
|  | CAMK2N1   |
|  | CAMKK2    |
|  | CAMLG     |
|  | CAMSAP1   |
|  | CAMSAP1L1 |
|  | CAND1     |
|  | CAND2     |
|  | CANT1     |
|  | CANX      |
|  | CAP1      |
|  | CAP2      |
|  | CAPG      |
|  | CAPN1     |
|  | CAPN12    |
|  | CAPN2     |
|  | CAPN3     |
|  | CAPN5     |
|  | CAPN6     |
|  | CAPN7     |
|  | CAPNS1    |
|  | CAPRIN1   |
|  | CAPRIN2   |
|  | CAPS      |
|  | CAPS2     |
|  | CAPZA1    |
|  | CAPZA2    |
|  | CAPZB     |
|  | CARD10    |
|  | CARD11    |
|  | CARD14    |
|  | CARD8     |
|  | CARHSP1   |
|  | CARKD     |
|  | CARM1     |
|  | CARS      |
|  | CARS2     |
|  | CASC3     |
|  | CASC4     |
|  | CASD1     |
|  | CASK      |
|  | CASKIN2   |
|  | CASP2     |
|  | CASP3     |
|  | CASP4     |

|  |            |
|--|------------|
|  | CASP6      |
|  | CASP7      |
|  | CASP9      |
|  | CAST       |
|  | CASZ1      |
|  | CAT        |
|  | CATSPER2   |
|  | CATSPER2P1 |
|  | CAV1       |
|  | CAV2       |
|  | CBARA1     |
|  | CBFA2T2    |
|  | CBFB       |
|  | CBL        |
|  | CBLB       |
|  | CBLL1      |
|  | CBLN3      |
|  | CBR1       |
|  | CBR3       |
|  | CBR4       |
|  | CBS        |
|  | CBWD1      |
|  | CBWD3      |
|  | CBWD5      |
|  | CBX1       |
|  | CBX2       |
|  | CBX3       |
|  | CBX4       |
|  | CBX5       |
|  | CBX6       |
|  | CBX7       |
|  | CBY1       |
|  | CC2D1A     |
|  | CC2D1B     |
|  | CCAR1      |
|  | CCBE1      |
|  | CCBL1      |
|  | CCBL2      |
|  | CCBP2      |
|  | CCDC101    |
|  | CCDC102A   |
|  | CCDC104    |
|  | CCDC106    |
|  | CCDC107    |
|  | CCDC109A   |
|  | CCDC109B   |
|  | CCDC112    |
|  | CCDC115    |
|  | CCDC117    |
|  | CCDC12     |
|  | CCDC120    |
|  | CCDC123    |
|  | CCDC124    |
|  | CCDC125    |
|  | CCDC127    |
|  | CCDC128    |

|  |          |
|--|----------|
|  | CCDC130  |
|  | CCDC132  |
|  | CCDC135  |
|  | CCDC14   |
|  | CCDC16   |
|  | CCDC18   |
|  | CCDC21   |
|  | CCDC22   |
|  | CCDC23   |
|  | CCDC24   |
|  | CCDC25   |
|  | CCDC28A  |
|  | CCDC28B  |
|  | CCDC34   |
|  | CCDC43   |
|  | CCDC45   |
|  | CCDC46   |
|  | CCDC47   |
|  | CCDC49   |
|  | CCDC5    |
|  | CCDC50   |
|  | CCDC51   |
|  | CCDC53   |
|  | CCDC55   |
|  | CCDC56   |
|  | CCDC58   |
|  | CCDC59   |
|  | CCDC6    |
|  | CCDC68   |
|  | CCDC69   |
|  | CCDC71   |
|  | CCDC72   |
|  | CCDC76   |
|  | CCDC77   |
|  | CCDC84   |
|  | CCDC85B  |
|  | CCDC86   |
|  | CCDC88C  |
|  | CCDC90A  |
|  | CCDC90B  |
|  | CCDC91   |
|  | CCDC92   |
|  | CCDC93   |
|  | CCDC94   |
|  | CCDC97   |
|  | CCHCR1   |
|  | CCL2     |
|  | CCL5     |
|  | CCM2     |
|  | CCNB1IP1 |
|  | CCNC     |
|  | CCND1    |
|  | CCND2    |
|  | CCND3    |
|  | CCNDBP1  |
|  | CCNE1    |

|  |        |
|--|--------|
|  | CCNE2  |
|  | CCNF   |
|  | CCNG1  |
|  | CCNG2  |
|  | CCNH   |
|  | CCNI   |
|  | CCNI2  |
|  | CCNK   |
|  | CCNL1  |
|  | CCNL2  |
|  | CCNT1  |
|  | CCNT2  |
|  | CCNY   |
|  | CCNYL1 |
|  | CCPG1  |
|  | CCR6   |
|  | CCRK   |
|  | CCRN4L |
|  | CCS    |
|  | CCT2   |
|  | CCT3   |
|  | CCT4   |
|  | CCT5   |
|  | CCT6A  |
|  | CCT6B  |
|  | CCT6P1 |
|  | CCT7   |
|  | CCT8   |
|  | CD14   |
|  | CD151  |
|  | CD163  |
|  | CD164  |
|  | CD1D   |
|  | CD24   |
|  | CD248  |
|  | CD276  |
|  | CD2AP  |
|  | CD2BP2 |
|  | CD302  |
|  | CD320  |
|  | CD34   |
|  | CD44   |
|  | CD46   |
|  | CD47   |
|  | CD52   |
|  | CD55   |
|  | CD58   |
|  | CD59   |
|  | CD63   |
|  | CD68   |
|  | CD74   |
|  | CD79A  |
|  | CD79B  |
|  | CD81   |
|  | CD82   |
|  | CD83   |

|  |          |
|--|----------|
|  | CD84     |
|  | CD86     |
|  | CD9      |
|  | CD97     |
|  | CD99     |
|  | CD99L2   |
|  | CDAN1    |
|  | CDC123   |
|  | CDC14A   |
|  | CDC14B   |
|  | CDC16    |
|  | CDC23    |
|  | CDC25A   |
|  | CDC25B   |
|  | CDC25C   |
|  | CDC26    |
|  | CDC2L1   |
|  | CDC2L2   |
|  | CDC2L5   |
|  | CDC2L6   |
|  | CDC34    |
|  | CDC37    |
|  | CDC40    |
|  | CDC42    |
|  | CDC42BPA |
|  | CDC42BPB |
|  | CDC42EP1 |
|  | CDC42EP2 |
|  | CDC42EP4 |
|  | CDC42SE1 |
|  | CDC42SE2 |
|  | CDC5L    |
|  | CDCA4    |
|  | CDCA7L   |
|  | CDH1     |
|  | CDH2     |
|  | CDH24    |
|  | CDIPT    |
|  | CDK10    |
|  | CDK2     |
|  | CDK2AP1  |
|  | CDK2AP2  |
|  | CDK4     |
|  | CDK5     |
|  | CDK5R1   |
|  | CDK5RAP1 |
|  | CDK5RAP2 |
|  | CDK5RAP3 |
|  | CDK6     |
|  | CDK7     |
|  | CDK9     |
|  | CDKL3    |
|  | CDKN1A   |
|  | CDKN1B   |
|  | CDKN1C   |
|  | CDKN2AIP |

|  |            |
|--|------------|
|  | CDKN2AIPNL |
|  | CDKN2B     |
|  | CDKN2D     |
|  | CDNF       |
|  | CDO1       |
|  | CDR2       |
|  | CDR2L      |
|  | CDRT4      |
|  | CDS2       |
|  | CDV3       |
|  | CDYL       |
|  | CEACAM1    |
|  | CEBPA      |
|  | CEBPB      |
|  | CEBPD      |
|  | CEBPG      |
|  | CEBPZ      |
|  | CECR1      |
|  | CECR5      |
|  | CECR7      |
|  | CELSR2     |
|  | CELSR3     |
|  | CENPB      |
|  | CENPBD1    |
|  | CENPC1     |
|  | CENPJ      |
|  | CENPL      |
|  | CENPN      |
|  | CENPT      |
|  | CENPV      |
|  | CENTA1     |
|  | CENTB2     |
|  | CENTD2     |
|  | CENTG2     |
|  | CENTG3     |
|  | CEP164     |
|  | CEP192     |
|  | CEP27      |
|  | CEP350     |
|  | CEP57      |
|  | CEP63      |
|  | CEP70      |
|  | CEP72      |
|  | CEP78      |
|  | CEPT1      |
|  | CERK       |
|  | CES1       |
|  | CES2       |
|  | CES3       |
|  | CETN2      |
|  | CETN3      |
|  | CFB        |
|  | CFD        |
|  | CFDP1      |
|  | CFH        |
|  | CFI        |



|  |         |
|--|---------|
|  | CFL1    |
|  | CFL2    |
|  | CFLAR   |
|  | CGGBP1  |
|  | CGI-96  |
|  | CGN     |
|  | CGNL1   |
|  | CGRRF1  |
|  | CHCHD1  |
|  | CHCHD10 |
|  | CHCHD2  |
|  | CHCHD3  |
|  | CHCHD4  |
|  | CHCHD5  |
|  | CHCHD6  |
|  | CHCHD7  |
|  | CHCHD8  |
|  | CHCHD9  |
|  | CHD1    |
|  | CHD1L   |
|  | CHD2    |
|  | CHD4    |
|  | CHD6    |
|  | CHD7    |
|  | CHD8    |
|  | CHD9    |
|  | CHDH    |
|  | CHEK1   |
|  | CHERP   |
|  | CHES1   |
|  | CHFR    |
|  | CHI3L1  |
|  | CHIC2   |
|  | CHKA    |
|  | CHKB    |
|  | CHM     |
|  | CHML    |
|  | CHMP1A  |
|  | CHMP1B  |
|  | CHMP2A  |
|  | CHMP2B  |
|  | CHMP4A  |
|  | CHMP4B  |
|  | CHMP4C  |
|  | CHMP5   |
|  | CHMP6   |
|  | CHMP7   |
|  | CHN2    |
|  | CHORDC1 |
|  | CHP     |
|  | CHPF    |
|  | CHPF2   |
|  | CHPT1   |
|  | CHRAC1  |
|  | CHRD    |
|  | CHRNA2  |

|  |             |
|--|-------------|
|  | CHRNA5      |
|  | CHRNB1      |
|  | CHST1       |
|  | CHST12      |
|  | CHST13      |
|  | CHST14      |
|  | CHST15      |
|  | CHST3       |
|  | CHST7       |
|  | CHSY1       |
|  | CHTF8       |
|  | CHUK        |
|  | CHURC1      |
|  | CIAO1       |
|  | CIAPIN1     |
|  | CIB1        |
|  | CIC         |
|  | CICE        |
|  | CICK0721Q.1 |
|  | CIDEB       |
|  | CIDEC       |
|  | CIDECP      |
|  | CINP        |
|  | CIP29       |
|  | CIR1        |
|  | CIRBP       |
|  | CIRH1A      |
|  | CISD1       |
|  | CISD2       |
|  | CISD3       |
|  | CITED2      |
|  | CITED4      |
|  | CKAP2       |
|  | CKAP4       |
|  | CKAP5       |
|  | CKB         |
|  | CKLF        |
|  | CKS1B       |
|  | CKS2        |
|  | CLASP1      |
|  | CLCC1       |
|  | CLCN3       |
|  | CLCN5       |
|  | CLCN6       |
|  | CLCN7       |
|  | CLDN1       |
|  | CLDN10      |
|  | CLDN12      |
|  | CLDN14      |
|  | CLDN15      |
|  | CLDN23      |
|  | CLDN3       |
|  | CLDN4       |
|  | CLDN7       |
|  | CLDN9       |
|  | CLDND1      |

|  |         |
|--|---------|
|  | CLDND2  |
|  | CLEC16A |
|  | CLEC2D  |
|  | CLIC1   |
|  | CLIC4   |
|  | CLINT1  |
|  | CLIP1   |
|  | CLIP2   |
|  | CLK1    |
|  | CLK2    |
|  | CLK3    |
|  | CLK4    |
|  | CLMN    |
|  | CLN3    |
|  | CLN5    |
|  | CLN6    |
|  | CLN8    |
|  | CLNS1A  |
|  | CLOCK   |
|  | CLP1    |
|  | CLPP    |
|  | CLPTM1  |
|  | CLPTM1L |
|  | CLPX    |
|  | CLRN1   |
|  | CLSTN1  |
|  | CLTA    |
|  | CLTB    |
|  | CLTC    |
|  | CLUAP1  |
|  | CLYBL   |
|  | CMAS    |
|  | CMBL    |
|  | CMC1    |
|  | CMIP    |
|  | CMPK1   |
|  | CMTM3   |
|  | CMTM4   |
|  | CMTM6   |
|  | CMTM7   |
|  | CMTM8   |
|  | CMYA5   |
|  | CNBP    |
|  | CNDP2   |
|  | CNIH    |
|  | CNIH4   |
|  | CNKSR1  |
|  | CNKSR3  |
|  | CNN2    |
|  | CNN3    |
|  | CNNM2   |
|  | CNNM3   |
|  | CNO     |
|  | CNOT1   |
|  | CNOT10  |
|  | CNOT2   |

|  |          |
|--|----------|
|  | CNOT3    |
|  | CNOT4    |
|  | CNOT6    |
|  | CNOT6L   |
|  | CNOT7    |
|  | CNOT8    |
|  | CNPY2    |
|  | CNPY3    |
|  | CNPY4    |
|  | CNTLN    |
|  | CNTNAP5  |
|  | COASY    |
|  | COBL     |
|  | COBLL1   |
|  | COBRA1   |
|  | COG1     |
|  | COG2     |
|  | COG3     |
|  | COG4     |
|  | COG5     |
|  | COG6     |
|  | COG7     |
|  | COG8     |
|  | COIL     |
|  | COL16A1  |
|  | COL18A1  |
|  | COL1A1   |
|  | COL1A2   |
|  | COL3A1   |
|  | COL4A1   |
|  | COL4A2   |
|  | COL4A3BP |
|  | COL5A1   |
|  | COL5A2   |
|  | COL6A1   |
|  | COL6A2   |
|  | COL6A3   |
|  | COL7A1   |
|  | COL8A2   |
|  | COLEC11  |
|  | COLQ     |
|  | COMMD1   |
|  | COMMD10  |
|  | COMMD2   |
|  | COMMD3   |
|  | COMMD4   |
|  | COMMD5   |
|  | COMMD6   |
|  | COMMD7   |
|  | COMMD8   |
|  | COMMD9   |
|  | COMT     |
|  | COMTD1   |
|  | COPA     |
|  | COPB1    |
|  | COPB2    |

|  |          |
|--|----------|
|  | COPE     |
|  | COPG     |
|  | COPG2    |
|  | COPG2IT1 |
|  | COPS2    |
|  | COPS3    |
|  | COPS4    |
|  | COPS5    |
|  | COPS6    |
|  | COPS7A   |
|  | COPS7B   |
|  | COPS8    |
|  | COPZ1    |
|  | COQ10A   |
|  | COQ10B   |
|  | COQ2     |
|  | COQ3     |
|  | COQ4     |
|  | COQ5     |
|  | COQ6     |
|  | COQ7     |
|  | COQ9     |
|  | CORO1B   |
|  | CORO1C   |
|  | CORO2A   |
|  | CORO7    |
|  | COTL1    |
|  | COX10    |
|  | COX15    |
|  | COX17    |
|  | COX19    |
|  | COX4I1   |
|  | COX4NB   |
|  | COX5A    |
|  | COX5B    |
|  | COX6A1   |
|  | COX6B1   |
|  | COX6C    |
|  | COX7A2   |
|  | COX7A2L  |
|  | COX7B    |
|  | COX7C    |
|  | COX8A    |
|  | CP110    |
|  | CPD      |
|  | CPE      |
|  | CPEB2    |
|  | CPEB3    |
|  | CPEB4    |
|  | CPM      |
|  | CPN1     |
|  | CPN2     |
|  | CPNE1    |
|  | CPNE3    |
|  | CPNE8    |
|  | CPOX     |

|  |         |
|--|---------|
|  | CPPED1  |
|  | CPS1    |
|  | CPSF1   |
|  | CPSF2   |
|  | CPSF3   |
|  | CPSF3L  |
|  | CPSF4   |
|  | CPT1A   |
|  | CPT1B   |
|  | CPT2    |
|  | CPVL    |
|  | CRABP2  |
|  | CRADD   |
|  | CRAMP1L |
|  | CRAT    |
|  | CRB3    |
|  | CRBN    |
|  | CRCP    |
|  | CREB1   |
|  | CREB3   |
|  | CREB3L2 |
|  | CREB3L3 |
|  | CREB3L4 |
|  | CREB5   |
|  | CREBBP  |
|  | CREBL1  |
|  | CREBL2  |
|  | CREBZF  |
|  | CREG1   |
|  | CRELD1  |
|  | CRELD2  |
|  | CRHR1   |
|  | CRIP1   |
|  | CRIP2   |
|  | CRIPAK  |
|  | CRIPT   |
|  | CRK     |
|  | CRKL    |
|  | CRKRS   |
|  | CRLF3   |
|  | CRLS1   |
|  | CRMP1   |
|  | CROP    |
|  | CROT    |
|  | CRSP9   |
|  | CRTAP   |
|  | CRTC2   |
|  | CRTC3   |
|  | CRY1    |
|  | CRY2    |
|  | CRYAB   |
|  | CRYL1   |
|  | CRYM    |
|  | CRYZ    |
|  | CRYZL1  |
|  | CS      |

|  |          |
|--|----------|
|  | CSAD     |
|  | CSDA     |
|  | CSDE1    |
|  | CSE1L    |
|  | CSF1R    |
|  | CSF2RA   |
|  | CSHL1    |
|  | CSK      |
|  | CSNK1A1  |
|  | CSNK1D   |
|  | CSNK1E   |
|  | CSNK1G1  |
|  | CSNK1G2  |
|  | CSNK1G3  |
|  | CSNK2A1  |
|  | CSNK2A1P |
|  | CSNK2A2  |
|  | CSNK2B   |
|  | CSPP1    |
|  | CSRNP2   |
|  | CSRP1    |
|  | CSRP2    |
|  | CSRP2BP  |
|  | CST3     |
|  | CSTB     |
|  | CSTF2    |
|  | CSTF2T   |
|  | CSTF3    |
|  | CTAGE6   |
|  | CTBP1    |
|  | CTBP2    |
|  | CTBS     |
|  | CTCF     |
|  | CTDP1    |
|  | CTDSP1   |
|  | CTDSP2   |
|  | CTDSPL   |
|  | CTDSPL2  |
|  | CTGF     |
|  | CTGLF3   |
|  | CTGLF7   |
|  | CTH      |
|  | CTHRC1   |
|  | CTNNA1   |
|  | CTNNAL1  |
|  | CTNNB1   |
|  | CTNNBIP1 |
|  | CTNNBL1  |
|  | CTNND1   |
|  | CTNS     |
|  | CTPS     |
|  | CTPS2    |
|  | CTR9     |
|  | CTSA     |
|  | CTSB     |
|  | CTSC     |

|  |          |
|--|----------|
|  | CTSD     |
|  | CTSH     |
|  | CTSL1    |
|  | CTSO     |
|  | CTSZ     |
|  | CTTN     |
|  | CTU2     |
|  | CTXN1    |
|  | CUEDC1   |
|  | CUEDC2   |
|  | CUGBP1   |
|  | CUL1     |
|  | CUL2     |
|  | CUL4A    |
|  | CUL4B    |
|  | CUL5     |
|  | CUL9     |
|  | CUTA     |
|  | CUTC     |
|  | CUTL1    |
|  | CWC15    |
|  | CWC22    |
|  | CWF19L1  |
|  | CWF19L2  |
|  | CX3CL1   |
|  | CXADR    |
|  | CXCL1    |
|  | CXCL12   |
|  | CXCL16   |
|  | CXCR7    |
|  | CXorf12  |
|  | CXorf26  |
|  | CXorf36  |
|  | CXorf38  |
|  | CXorf39  |
|  | CXorf40A |
|  | CXorf40B |
|  | CXorf57  |
|  | CXorf64  |
|  | CXXC1    |
|  | CXXC5    |
|  | CYB561   |
|  | CYB561D1 |
|  | CYB561D2 |
|  | CYB5A    |
|  | CYB5B    |
|  | CYB5D1   |
|  | CYB5D2   |
|  | CYB5R1   |
|  | CYB5R2   |
|  | CYB5R3   |
|  | CYB5R4   |
|  | CYBA     |
|  | CYBASC3  |
|  | CYBRD1   |
|  | CYC1     |



|  |          |
|--|----------|
|  | CYCS     |
|  | CYCSL1   |
|  | CYFIP1   |
|  | CYFIP2   |
|  | CYGB     |
|  | CYHR1    |
|  | CYLD     |
|  | CYLN2    |
|  | CYorf14  |
|  | CYorf15A |
|  | CYP11A1  |
|  | CYP20A1  |
|  | CYP26B1  |
|  | CYP27A1  |
|  | CYP2C8   |
|  | CYP2J2   |
|  | CYP2R1   |
|  | CYP2U1   |
|  | CYP3A7   |
|  | CYP4V2   |
|  | CYP51A1  |
|  | CYR61    |
|  | CYTH1    |
|  | CYTH2    |
|  | CYTH3    |
|  | CYTSA    |
|  | D2HGDH   |
|  | DAAM1    |
|  | DAAM2    |
|  | DAB2     |
|  | DACT2    |
|  | DAD1     |
|  | DAG1     |
|  | DAGLB    |
|  | DAK      |
|  | DAP      |
|  | DAP3     |
|  | DAPK1    |
|  | DAPK3    |
|  | DAPP1    |
|  | DARS     |
|  | DARS2    |
|  | DAXX     |
|  | DAZAP1   |
|  | DAZAP2   |
|  | DBI      |
|  | DBN1     |
|  | DBNDD1   |
|  | DBNDD2   |
|  | DBNL     |
|  | DBP      |
|  | DBR1     |
|  | DBT      |
|  | DCAF10   |
|  | DCAF15   |
|  | DCAF16   |

|  |              |
|--|--------------|
|  | DCAF6        |
|  | DCAF7        |
|  | DCAKD        |
|  | DCBLD1       |
|  | DCBLD2       |
|  | DCI          |
|  | DCK          |
|  | DCLRE1A      |
|  | DCLRE1C      |
|  | DCN          |
|  | DCP1A        |
|  | DCP1B        |
|  | DCP2         |
|  | DCPS         |
|  | DCTD         |
|  | DCTN1        |
|  | DCTN2        |
|  | DCTN3        |
|  | DCTN4        |
|  | DCTN5        |
|  | DCTN6        |
|  | DCTPP1       |
|  | DCUN1D1      |
|  | DCUN1D3      |
|  | DCUN1D4      |
|  | DCUN1D5      |
|  | DCXR         |
|  | DDA1         |
|  | DDAH1        |
|  | DDAH2        |
|  | DDB1         |
|  | DDB2         |
|  | DDC          |
|  | DDEF2        |
|  | DDHD2        |
|  | DDIT3        |
|  | DDIT4        |
|  | DDOST        |
|  | DDR1         |
|  | DDRGK1       |
|  | DDT          |
|  | DDX1         |
|  | DDX10        |
|  | DDX12        |
|  | DDX17        |
|  | DDX18        |
|  | DDX19A       |
|  | DDX19B       |
|  | DDX19-DDX19L |
|  | DDX21        |
|  | DDX23        |
|  | DDX24        |
|  | DDX27        |
|  | DDX28        |
|  | DDX31        |
|  | DDX39        |

|  |         |
|--|---------|
|  | DDX3X   |
|  | DDX41   |
|  | DDX42   |
|  | DDX46   |
|  | DDX47   |
|  | DDX49   |
|  | DDX5    |
|  | DDX50   |
|  | DDX51   |
|  | DDX52   |
|  | DDX54   |
|  | DDX55   |
|  | DDX56   |
|  | DDX58   |
|  | DDX59   |
|  | DDX60   |
|  | DEAF1   |
|  | DECR1   |
|  | DECR2   |
|  | DEDD    |
|  | DEDD2   |
|  | DEF6    |
|  | DEF8    |
|  | DEFB1   |
|  | DEFB123 |
|  | DEGS1   |
|  | DEK     |
|  | DEM1    |
|  | DENND1A |
|  | DENND2C |
|  | DENND4A |
|  | DENND4B |
|  | DENND4C |
|  | DENND5A |
|  | DENND5B |
|  | DENR    |
|  | DEPDC5  |
|  | DEPDC6  |
|  | DERA    |
|  | DERL1   |
|  | DERL2   |
|  | DET1    |
|  | DEXI    |
|  | DFFA    |
|  | DFFB    |
|  | DFNA5   |
|  | DFNB59  |
|  | DGAT1   |
|  | DGAT2   |
|  | DGCR11  |
|  | DGCR14  |
|  | DGCR2   |
|  | DGCR6   |
|  | DGCR6L  |
|  | DGCR8   |
|  | DGKD    |

|  |                |
|--|----------------|
|  | DGKQ           |
|  | DGUOK          |
|  | DHCR24         |
|  | DHCR7          |
|  | DHDDS          |
|  | DHFRL1         |
|  | DHPS           |
|  | DHRS1          |
|  | DHRS11         |
|  | DHRS12         |
|  | DHRS13         |
|  | DHRS3          |
|  | DHRS4          |
|  | DHRS4L1        |
|  | DHRS4L2        |
|  | DHRS7          |
|  | DHRS7B         |
|  | DHRSX          |
|  | DHTKD1         |
|  | DHX15          |
|  | DHX16          |
|  | DHX29          |
|  | DHX30          |
|  | DHX32          |
|  | DHX33          |
|  | DHX34          |
|  | DHX35          |
|  | DHX36          |
|  | DHX37          |
|  | DHX38          |
|  | DHX40          |
|  | DHX8           |
|  | DHX9           |
|  | DIABLO         |
|  | DIAPH1         |
|  | DIAPH2         |
|  | DICER1         |
|  | DIDO1          |
|  | DIMT1L         |
|  | DIO1           |
|  | DIO2           |
|  | DIP2A          |
|  | DIP2B          |
|  | DIP2C          |
|  | DIRC2          |
|  | DIS3L          |
|  | DIS3L2         |
|  | DISP1          |
|  | DIXDC1         |
|  | dJ341D10.1     |
|  | DKC1           |
|  | DKFZp434K191   |
|  | DKFZp434M131   |
|  | DKFZp434N035   |
|  | DKFZP586I1420  |
|  | DKFZp686O24166 |

|  |               |
|--|---------------|
|  | DKFZp761P0423 |
|  | DKFZP779L1853 |
|  | DKK1          |
|  | DKK3          |
|  | DLAT          |
|  | DLD           |
|  | DLEU1         |
|  | DLEU2         |
|  | DLG1          |
|  | DLG5          |
|  | DLGAP4        |
|  | DLK2          |
|  | DLST          |
|  | DMAP1         |
|  | DMC1          |
|  | DMKN          |
|  | DMTF1         |
|  | DMWD          |
|  | DMXL1         |
|  | DNA2          |
|  | DNAH1         |
|  | DNAJA1        |
|  | DNAJA2        |
|  | DNAJA3        |
|  | DNAJB1        |
|  | DNAJB11       |
|  | DNAJB12       |
|  | DNAJB14       |
|  | DNAJB2        |
|  | DNAJB4        |
|  | DNAJB5        |
|  | DNAJB6        |
|  | DNAJB9        |
|  | DNAJC1        |
|  | DNAJC10       |
|  | DNAJC13       |
|  | DNAJC14       |
|  | DNAJC15       |
|  | DNAJC17       |
|  | DNAJC19       |
|  | DNAJC21       |
|  | DNAJC22       |
|  | DNAJC24       |
|  | DNAJC25       |
|  | DNAJC27       |
|  | DNAJC3        |
|  | DNAJC30       |
|  | DNAJC4        |
|  | DNAJC5        |
|  | DNAJC7        |
|  | DNAJC8        |
|  | DNAJC9        |
|  | DNAL1         |
|  | DNAL4         |
|  | DNALI1        |
|  | DNASE1L1      |

|  |         |
|--|---------|
|  | DNASE2  |
|  | DNCL1   |
|  | DNLZ    |
|  | DNM1L   |
|  | DNM2    |
|  | DNMT1   |
|  | DNPEP   |
|  | DNTTIP1 |
|  | DOCK1   |
|  | DOCK2   |
|  | DOCK3   |
|  | DOCK6   |
|  | DOCK7   |
|  | DOHH    |
|  | DOK4    |
|  | DOLK    |
|  | DOLPP1  |
|  | DOM3Z   |
|  | DONSON  |
|  | DOPEY2  |
|  | DOT1L   |
|  | DPAGT1  |
|  | DPF2    |
|  | DPH2    |
|  | DPH3    |
|  | DPH5    |
|  | DPM1    |
|  | DPM2    |
|  | DPM3    |
|  | DPP3    |
|  | DPP4    |
|  | DPP7    |
|  | DPP8    |
|  | DPP9    |
|  | DPY19L1 |
|  | DPY19L4 |
|  | DPY30   |
|  | DPYS    |
|  | DPYSL2  |
|  | DR1     |
|  | DRAM1   |
|  | DRAP1   |
|  | DRD4    |
|  | DRG1    |
|  | DRG2    |
|  | DSC2    |
|  | DSCAM   |
|  | DSCC1   |
|  | DSCR3   |
|  | DSE     |
|  | DSG2    |
|  | DSN1    |
|  | DSP     |
|  | DST     |
|  | DSTN    |
|  | DSTYK   |

|  |          |
|--|----------|
|  | DTD1     |
|  | DTNA     |
|  | DTNBP1   |
|  | DTWD1    |
|  | DTWD2    |
|  | DTX2     |
|  | DTX3L    |
|  | DULLARD  |
|  | DUS1L    |
|  | DUS2L    |
|  | DUS3L    |
|  | DUS4L    |
|  | DUSP1    |
|  | DUSP10   |
|  | DUSP11   |
|  | DUSP12   |
|  | DUSP13   |
|  | DUSP14   |
|  | DUSP15   |
|  | DUSP16   |
|  | DUSP18   |
|  | DUSP19   |
|  | DUSP2    |
|  | DUSP22   |
|  | DUSP23   |
|  | DUSP28   |
|  | DUSP3    |
|  | DUSP5    |
|  | DUSP6    |
|  | DUSP8    |
|  | DUT      |
|  | DUXAP3   |
|  | DVL2     |
|  | DVL3     |
|  | DYDC2    |
|  | DYM      |
|  | DYNC1H1  |
|  | DYNC1I2  |
|  | DYNC1LI2 |
|  | DYNC2H1  |
|  | DYNC2LI1 |
|  | DYNLL1   |
|  | DYNLL2   |
|  | DYNLRB1  |
|  | DYNLT1   |
|  | DYNLT3   |
|  | DYRK1A   |
|  | DYRK1B   |
|  | DYRK2    |
|  | DYRK4    |
|  | DYSF     |
|  | E2F1     |
|  | E2F3     |
|  | E2F4     |
|  | E2F5     |
|  | E2F6     |

|  |          |
|--|----------|
|  | E4F1     |
|  | EAF1     |
|  | EAF2     |
|  | EAPP     |
|  | EARS2    |
|  | EBAG9    |
|  | EBF4     |
|  | EBNA1BP2 |
|  | EBP      |
|  | EBPL     |
|  | ECD      |
|  | ECE2     |
|  | ECGF1    |
|  | ECH1     |
|  | ECHDC1   |
|  | ECHDC2   |
|  | ECHDC3   |
|  | ECHS1    |
|  | ECM1     |
|  | ECOP     |
|  | ECSIT    |
|  | ECT2     |
|  | EDARADD  |
|  | EDC3     |
|  | EDC4     |
|  | EDEM1    |
|  | EDEM2    |
|  | EDEM3    |
|  | EDF1     |
|  | EDG1     |
|  | EDG4     |
|  | EED      |
|  | EEF1A1   |
|  | EEF1AL7  |
|  | EEF1B2   |
|  | EEF1D    |
|  | EEF1E1   |
|  | EEF1G    |
|  | EEF2     |
|  | EEF2K    |
|  | EFCAB4A  |
|  | EFEMP2   |
|  | EFHA1    |
|  | EFHD1    |
|  | EFHD2    |
|  | EFNA1    |
|  | EFNA4    |
|  | EFNB1    |
|  | EFR3A    |
|  | EFR3B    |
|  | EFTUD1   |
|  | EFTUD2   |
|  | EGFL7    |
|  | EGFR     |
|  | EGLN1    |
|  | EGLN2    |



|  |          |
|--|----------|
|  | EGOT     |
|  | EGR1     |
|  | EHBP1    |
|  | EHBP1L1  |
|  | EHD1     |
|  | EHD2     |
|  | EHD4     |
|  | EHHADH   |
|  | EHMT2    |
|  | EI24     |
|  | EID1     |
|  | EID2     |
|  | EID2B    |
|  | EIF1     |
|  | EIF1AD   |
|  | EIF1AX   |
|  | EIF1AY   |
|  | EIF1B    |
|  | EIF2A    |
|  | EIF2AK1  |
|  | EIF2AK2  |
|  | EIF2AK3  |
|  | EIF2AK4  |
|  | EIF2B1   |
|  | EIF2B2   |
|  | EIF2B3   |
|  | EIF2B4   |
|  | EIF2B5   |
|  | EIF2C1   |
|  | EIF2C2   |
|  | EIF2C3   |
|  | EIF2S1   |
|  | EIF2S2   |
|  | EIF2S3   |
|  | EIF3A    |
|  | EIF3B    |
|  | EIF3C    |
|  | EIF3D    |
|  | EIF3E    |
|  | EIF3F    |
|  | EIF3G    |
|  | EIF3H    |
|  | EIF3I    |
|  | EIF3J    |
|  | EIF3K    |
|  | EIF3L    |
|  | EIF3M    |
|  | EIF4A1   |
|  | EIF4A2   |
|  | EIF4A3   |
|  | EIF4B    |
|  | EIF4E    |
|  | EIF4E2   |
|  | EIF4E3   |
|  | EIF4EBP1 |
|  | EIF4EBP2 |

|  |           |
|--|-----------|
|  | EIF4EBP3  |
|  | EIF4ENIF1 |
|  | EIF4G1    |
|  | EIF4G2    |
|  | EIF4G3    |
|  | EIF4H     |
|  | EIF5      |
|  | EIF5A     |
|  | EIF5B     |
|  | EIF6      |
|  | ELAC1     |
|  | ELAC2     |
|  | ELAVL1    |
|  | ELF1      |
|  | ELF2      |
|  | ELF3      |
|  | ELF4      |
|  | ELF5      |
|  | ELK1      |
|  | ELL       |
|  | ELL2      |
|  | ELL3      |
|  | ELMO1     |
|  | ELMO2     |
|  | ELMO3     |
|  | ELMOD2    |
|  | ELMOD3    |
|  | ELOF1     |
|  | ELOVL1    |
|  | ELOVL2    |
|  | ELOVL5    |
|  | ELOVL6    |
|  | ELP2      |
|  | ELP3      |
|  | ELP4      |
|  | EMD       |
|  | EMG1      |
|  | EML2      |
|  | EML3      |
|  | EML4      |
|  | EMP1      |
|  | EMP3      |
|  | EMX2OS    |
|  | ENC1      |
|  | ENDOG     |
|  | ENHO      |
|  | ENO1      |
|  | ENO3      |
|  | ENOPH1    |
|  | ENOSF1    |
|  | ENOX2     |
|  | ENPEP     |
|  | ENPP1     |
|  | ENPP4     |
|  | ENSA      |
|  | ENTPD3    |

|  |          |
|--|----------|
|  | ENTPD4   |
|  | ENTPD5   |
|  | ENTPD6   |
|  | ENTPD7   |
|  | ENY2     |
|  | EP300    |
|  | EP400    |
|  | EPAS1    |
|  | EPB41L1  |
|  | EPB41L2  |
|  | EPB41L4A |
|  | EPB41L4B |
|  | EPB41L5  |
|  | EPB49    |
|  | EPCAM    |
|  | EPDR1    |
|  | EPHA1    |
|  | EPHA10   |
|  | EPHA2    |
|  | EPHA8    |
|  | EPHB4    |
|  | EPHX1    |
|  | EPHX2    |
|  | EPM2A    |
|  | EPM2AIP1 |
|  | EPN1     |
|  | EPN2     |
|  | EPO      |
|  | EPOR     |
|  | EPPB9    |
|  | EPRS     |
|  | EPS15    |
|  | EPS15L1  |
|  | EPS8     |
|  | EPSTI1   |
|  | ERAL1    |
|  | ERAP2    |
|  | ERBB2    |
|  | ERBB3    |
|  | ERC1     |
|  | ERCC1    |
|  | ERCC2    |
|  | ERCC3    |
|  | ERCC5    |
|  | ERCC8    |
|  | ERF      |
|  | ERGIC1   |
|  | ERGIC2   |
|  | ERGIC3   |
|  | ERH      |
|  | ERI1     |
|  | ERI2     |
|  | ERI3     |
|  | ERICH1   |
|  | ERLIN1   |
|  | ERLIN2   |

|  |         |
|--|---------|
|  | ERMAP   |
|  | ERMP1   |
|  | ERN1    |
|  | ERO1L   |
|  | ERP29   |
|  | ERRFI1  |
|  | ESAM    |
|  | ESCO1   |
|  | ESD     |
|  | ESPL1   |
|  | ESPN    |
|  | ESRRA   |
|  | ESRRAP2 |
|  | ESYT1   |
|  | ETF1    |
|  | ETFA    |
|  | ETFB    |
|  | ETFDH   |
|  | ETHE1   |
|  | ETNK1   |
|  | ETNK2   |
|  | ETS1    |
|  | ETS2    |
|  | ETV5    |
|  | ETV6    |
|  | EVI5    |
|  | EVI5L   |
|  | EVL     |
|  | EWSR1   |
|  | EXD2    |
|  | EXD3    |
|  | EXOC1   |
|  | EXOC2   |
|  | EXOC3   |
|  | EXOC4   |
|  | EXOC5   |
|  | EXOC6   |
|  | EXOC7   |
|  | EXOSC1  |
|  | EXOSC10 |
|  | EXOSC2  |
|  | EXOSC3  |
|  | EXOSC4  |
|  | EXOSC5  |
|  | EXOSC6  |
|  | EXOSC7  |
|  | EXOSC8  |
|  | EXOSC9  |
|  | EXT1    |
|  | EXT2    |
|  | EXTL2   |
|  | EXTL3   |
|  | EYA3    |
|  | EYS     |
|  | EZH2    |
|  | EZR     |

|  |          |
|--|----------|
|  | F10      |
|  | F11R     |
|  | F12      |
|  | F2       |
|  | F2R      |
|  | F3       |
|  | F7       |
|  | F8A1     |
|  | FAAH     |
|  | FAAH2    |
|  | FABP5    |
|  | FABP5L2  |
|  | FADD     |
|  | FADS1    |
|  | FADS2    |
|  | FADS3    |
|  | FAF1     |
|  | FAF2     |
|  | FAH      |
|  | FAHD1    |
|  | FAHD2A   |
|  | FAHD2B   |
|  | FAIM     |
|  | FAM100A  |
|  | FAM100B  |
|  | FAM102A  |
|  | FAM102B  |
|  | FAM103A1 |
|  | FAM104A  |
|  | FAM104B  |
|  | FAM105A  |
|  | FAM105B  |
|  | FAM107B  |
|  | FAM108A2 |
|  | FAM108A3 |
|  | FAM108B1 |
|  | FAM108C1 |
|  | FAM109A  |
|  | FAM10A4  |
|  | FAM10A7  |
|  | FAM110A  |
|  | FAM110B  |
|  | FAM111A  |
|  | FAM113A  |
|  | FAM113B  |
|  | FAM114A2 |
|  | FAM115A  |
|  | FAM116A  |
|  | FAM116B  |
|  | FAM117A  |
|  | FAM117B  |
|  | FAM118A  |
|  | FAM118B  |
|  | FAM119A  |
|  | FAM119B  |
|  | FAM120A  |

|  |           |
|--|-----------|
|  | FAM120AOS |
|  | FAM120B   |
|  | FAM122A   |
|  | FAM122B   |
|  | FAM125A   |
|  | FAM125B   |
|  | FAM126B   |
|  | FAM127A   |
|  | FAM127B   |
|  | FAM127C   |
|  | FAM128A   |
|  | FAM129B   |
|  | FAM131A   |
|  | FAM133B   |
|  | FAM134A   |
|  | FAM134B   |
|  | FAM134C   |
|  | FAM136A   |
|  | FAM136B   |
|  | FAM13A    |
|  | FAM13B    |
|  | FAM149A   |
|  | FAM149B1  |
|  | FAM14B    |
|  | FAM151A   |
|  | FAM153B   |
|  | FAM156A   |
|  | FAM156B   |
|  | FAM158A   |
|  | FAM160A2  |
|  | FAM160B1  |
|  | FAM160B2  |
|  | FAM162A   |
|  | FAM164C   |
|  | FAM165B   |
|  | FAM168B   |
|  | FAM171A1  |
|  | FAM172A   |
|  | FAM173A   |
|  | FAM173B   |
|  | FAM174A   |
|  | FAM174B   |
|  | FAM175A   |
|  | FAM175B   |
|  | FAM176A   |
|  | FAM176B   |
|  | FAM177A1  |
|  | FAM178A   |
|  | FAM179B   |
|  | FAM184A   |
|  | FAM188A   |
|  | FAM188B   |
|  | FAM189B   |
|  | FAM18B    |
|  | FAM18B2   |
|  | FAM190B   |

|  |         |
|--|---------|
|  | FAM193A |
|  | FAM193B |
|  | FAM195A |
|  | FAM195B |
|  | FAM20A  |
|  | FAM20B  |
|  | FAM20C  |
|  | FAM21D  |
|  | FAM24B  |
|  | FAM26E  |
|  | FAM30A  |
|  | FAM32A  |
|  | FAM35A  |
|  | FAM36A  |
|  | FAM38A  |
|  | FAM38B  |
|  | FAM39DP |
|  | FAM39E  |
|  | FAM3A   |
|  | FAM3C   |
|  | FAM40A  |
|  | FAM40B  |
|  | FAM43A  |
|  | FAM44B  |
|  | FAM45A  |
|  | FAM46A  |
|  | FAM46C  |
|  | FAM48A  |
|  | FAM49B  |
|  | FAM50A  |
|  | FAM53B  |
|  | FAM53C  |
|  | FAM54B  |
|  | FAM57A  |
|  | FAM58A  |
|  | FAM60A  |
|  | FAM62B  |
|  | FAM63A  |
|  | FAM65A  |
|  | FAM69A  |
|  | FAM69B  |
|  | FAM71E1 |
|  | FAM72B  |
|  | FAM73A  |
|  | FAM73B  |
|  | FAM75B  |
|  | FAM75C1 |
|  | FAM76B  |
|  | FAM82A2 |
|  | FAM83D  |
|  | FAM83F  |
|  | FAM83H  |
|  | FAM84B  |
|  | FAM86A  |
|  | FAM86B1 |
|  | FAM86C  |

|  |         |
|--|---------|
|  | FAM86D  |
|  | FAM89A  |
|  | FAM89B  |
|  | FAM8A1  |
|  | FAM90A3 |
|  | FAM91A1 |
|  | FAM92A1 |
|  | FAM96A  |
|  | FAM96B  |
|  | FAM98A  |
|  | FAM98C  |
|  | FANCC   |
|  | FANCE   |
|  | FANCG   |
|  | FANCL   |
|  | FARP1   |
|  | FARP2   |
|  | FARS2   |
|  | FARSA   |
|  | FARSLB  |
|  | FASN    |
|  | FASTK   |
|  | FASTKD1 |
|  | FASTKD2 |
|  | FASTKD3 |
|  | FASTKD5 |
|  | FAT1    |
|  | FAU     |
|  | FBL     |
|  | FBLN5   |
|  | FBLN7   |
|  | FBP1    |
|  | FBRS    |
|  | FBS1    |
|  | FBXL10  |
|  | FBXL11  |
|  | FBXL12  |
|  | FBXL15  |
|  | FBXL18  |
|  | FBXL20  |
|  | FBXL3   |
|  | FBXL5   |
|  | FBXL6   |
|  | FBXO11  |
|  | FBXO17  |
|  | FBXO18  |
|  | FBXO2   |
|  | FBXO21  |
|  | FBXO22  |
|  | FBXO28  |
|  | FBXO3   |
|  | FBXO30  |
|  | FBXO31  |
|  | FBXO32  |
|  | FBXO33  |
|  | FBXO34  |



|  |          |
|--|----------|
|  | FBXO38   |
|  | FBXO4    |
|  | FBXO42   |
|  | FBXO44   |
|  | FBXO46   |
|  | FBXO5    |
|  | FBXO6    |
|  | FBXO7    |
|  | FBXO8    |
|  | FBXW11   |
|  | FBXW2    |
|  | FBXW4    |
|  | FBXW5    |
|  | FBXW7    |
|  | FBXW8    |
|  | FBXW9    |
|  | FCAR     |
|  | FCF1     |
|  | FCGR2A   |
|  | FCGR2B   |
|  | FCGR3A   |
|  | FCGR3B   |
|  | FCGRT    |
|  | FCHO2    |
|  | FCHSD2   |
|  | FCRLB    |
|  | FDFT1    |
|  | FDPS     |
|  | FDX1     |
|  | FDX1L    |
|  | FECH     |
|  | FEM1A    |
|  | FEM1C    |
|  | FEN1     |
|  | FER1L4   |
|  | FERMT2   |
|  | FES      |
|  | FEZ1     |
|  | FEZ2     |
|  | FGA      |
|  | FGB      |
|  | FGD2     |
|  | FGF18    |
|  | FGF23    |
|  | FGFR1OP  |
|  | FGFR1OP2 |
|  | FGFR3    |
|  | FGFR4    |
|  | FGFRL1   |
|  | FGG      |
|  | FGGY     |
|  | FGL1     |
|  | FGL2     |
|  | FGR      |
|  | FH       |
|  | FHIT     |

|  |          |
|--|----------|
|  | FHL1     |
|  | FHL2     |
|  | FHL3     |
|  | FIBP     |
|  | FICD     |
|  | FIG4     |
|  | FIGNL2   |
|  | FILIP1L  |
|  | FIP1L1   |
|  | FIS1     |
|  | FIZ1     |
|  | FJX1     |
|  | FKBP11   |
|  | FKBP14   |
|  | FKBP15   |
|  | FKBP1A   |
|  | FKBP1B   |
|  | FKBP1P1  |
|  | FKBP2    |
|  | FKBP3    |
|  | FKBP4    |
|  | FKBP5    |
|  | FKBP8    |
|  | FKBP9L   |
|  | FKRP     |
|  | FKSG30   |
|  | FKTN     |
|  | FLAD1    |
|  | FLCN     |
|  | FLI1     |
|  | FLII     |
|  | FLJ10081 |
|  | FLJ10213 |
|  | FLJ10357 |
|  | FLJ10374 |
|  | FLJ10916 |
|  | FLJ10986 |
|  | FLJ12355 |
|  | FLJ12949 |
|  | FLJ20021 |
|  | FLJ20125 |
|  | FLJ20254 |
|  | FLJ20273 |
|  | FLJ20444 |
|  | FLJ20489 |
|  | FLJ20628 |
|  | FLJ20674 |
|  | FLJ20699 |
|  | FLJ20718 |
|  | FLJ20850 |
|  | FLJ20920 |
|  | FLJ21865 |
|  | FLJ21986 |
|  | FLJ22184 |
|  | FLJ22222 |
|  | FLJ22531 |

|  |          |
|--|----------|
|  | FLJ22662 |
|  | FLJ22795 |
|  | FLJ23584 |
|  | FLJ25363 |
|  | FLJ30092 |
|  | FLJ31306 |
|  | FLJ33630 |
|  | FLJ35220 |
|  | FLJ35390 |
|  | FLJ36070 |
|  | FLJ36131 |
|  | FLJ37396 |
|  | FLJ37786 |
|  | FLJ38482 |
|  | FLJ38717 |
|  | FLJ38973 |
|  | FLJ39827 |
|  | FLJ40113 |
|  | FLJ40504 |
|  | FLJ40722 |
|  | FLJ40852 |
|  | FLJ42258 |
|  | FLJ42627 |
|  | FLJ43681 |
|  | FLJ44054 |
|  | FLJ44124 |
|  | FLJ45032 |
|  | FLJ45202 |
|  | FLJ45244 |
|  | FLJ45256 |
|  | FLJ46309 |
|  | FLJ46552 |
|  | FLJ46906 |
|  | FLJ90086 |
|  | FLNA     |
|  | FLNB     |
|  | FLNC     |
|  | FLOT1    |
|  | FLOT2    |
|  | FLRT3    |
|  | FLVCR2   |
|  | FLYWCH2  |
|  | FMO1     |
|  | FMO4     |
|  | FMO5     |
|  | FMO6P    |
|  | FN3KRP   |
|  | FNBP1    |
|  | FNBP1L   |
|  | FNBP4    |
|  | FNDC3A   |
|  | FNDC3B   |
|  | FNDC4    |
|  | FNDC5    |
|  | FNIP1    |
|  | FNIP2    |

|  |         |
|--|---------|
|  | FNTA    |
|  | FNTB    |
|  | FOLH1   |
|  | FOLR1   |
|  | FOS     |
|  | FOSB    |
|  | FOSL2   |
|  | FOXA1   |
|  | FOXA2   |
|  | FOXA3   |
|  | FOXC1   |
|  | FOXC2   |
|  | FOXD4L4 |
|  | FOXJ2   |
|  | FOXJ3   |
|  | FOXK1   |
|  | FOXN2   |
|  | FOXO1   |
|  | FOXO3   |
|  | FOXO4   |
|  | FOXP1   |
|  | FOXQ1   |
|  | FOXRED1 |
|  | FOXRED2 |
|  | FRAG1   |
|  | FRAP1   |
|  | FRAT2   |
|  | FREQ    |
|  | FRG1    |
|  | FRMD6   |
|  | FRMD8   |
|  | FRRS1   |
|  | FRS3    |
|  | FRYL    |
|  | FSCN1   |
|  | FST     |
|  | FSTL1   |
|  | FSTL3   |
|  | FTCD    |
|  | FTH1    |
|  | FTHL11  |
|  | FTHL12  |
|  | FTHL16  |
|  | FTHL2   |
|  | FTHL3   |
|  | FTHL7   |
|  | FTHL8   |
|  | FTL     |
|  | FTO     |
|  | FTSJ1   |
|  | FTSJ2   |
|  | FTSJ3   |
|  | FTSJD1  |
|  | FTSJD2  |
|  | FUBP1   |
|  | FUBP3   |

|  |            |
|--|------------|
|  | FUCA1      |
|  | FUCA2      |
|  | FUK        |
|  | FUNDC1     |
|  | FURIN      |
|  | FUS        |
|  | FUT11      |
|  | FUT4       |
|  | FUT6       |
|  | FUZ        |
|  | FVT1       |
|  | FXC1       |
|  | FXR1       |
|  | FXR2       |
|  | FXYD1      |
|  | FXYD2      |
|  | FXYD5      |
|  | FYCO1      |
|  | FYN        |
|  | FYTTD1     |
|  | FZD1       |
|  | FZD4       |
|  | FZD5       |
|  | FZD7       |
|  | FZD8       |
|  | FZR1       |
|  | G3BP1      |
|  | G3BP2      |
|  | G6PC3      |
|  | G6PD       |
|  | GAA        |
|  | GAB2       |
|  | GABARAP    |
|  | GABARAPL1  |
|  | GABARAPL2  |
|  | GABPA      |
|  | GABPB1     |
|  | GABPB2     |
|  | GABRE      |
|  | GAD1       |
|  | GADD45A    |
|  | GADD45B    |
|  | GADD45G    |
|  | GADD45GIP1 |
|  | GAK        |
|  | GAL        |
|  | GAL3ST1    |
|  | GALC       |
|  | GALE       |
|  | GALK1      |
|  | GALK2      |
|  | GALM       |
|  | GALNS      |
|  | GALNT1     |
|  | GALNT11    |
|  | GALNT2     |

|  |         |
|--|---------|
|  | GALNT3  |
|  | GALNT4  |
|  | GALNTL4 |
|  | GALT    |
|  | GAMT    |
|  | GANAB   |
|  | GAPDH   |
|  | GAPDHL6 |
|  | GAPVD1  |
|  | GAR1    |
|  | GARNL4  |
|  | GARS    |
|  | GART    |
|  | GAS2L3  |
|  | GAS6    |
|  | GAS8    |
|  | GATA4   |
|  | GATAD1  |
|  | GATAD2A |
|  | GATAD2B |
|  | GATC    |
|  | GATM    |
|  | GATS    |
|  | GBA     |
|  | GBA2    |
|  | GBAS    |
|  | GBE1    |
|  | GBF1    |
|  | GBP1    |
|  | GBP2    |
|  | GBP4    |
|  | GCA     |
|  | GCAT    |
|  | GCC1    |
|  | GCDH    |
|  | GCET2   |
|  | GCGR    |
|  | GCH1    |
|  | GCHFR   |
|  | GCKR    |
|  | GCLC    |
|  | GCLM    |
|  | GCM1    |
|  | GCN1L1  |
|  | GCNT2   |
|  | GCNT3   |
|  | GCSH    |
|  | GDAP2   |
|  | GDE1    |
|  | GDF11   |
|  | GDF15   |
|  | GDI1    |
|  | GDI2    |
|  | GDPD1   |
|  | GDPD5   |
|  | GEMIN4  |

|  |         |
|--|---------|
|  | GEMIN5  |
|  | GEMIN6  |
|  | GEMIN8  |
|  | GEN1    |
|  | GFM1    |
|  | GFM2    |
|  | GFOD1   |
|  | GFOD2   |
|  | GFPT1   |
|  | GGA1    |
|  | GGA2    |
|  | GGA3    |
|  | GGCT    |
|  | GGCX    |
|  | GGH     |
|  | GGNBP2  |
|  | GGPS1   |
|  | GHDC    |
|  | GHITM   |
|  | GHR     |
|  | GINS3   |
|  | GIPC1   |
|  | GIT1    |
|  | GIT2    |
|  | GIYD1   |
|  | GIYD2   |
|  | GJB1    |
|  | GJB2    |
|  | GJC1    |
|  | GKAP1   |
|  | GLA     |
|  | GLB1    |
|  | GLB1L   |
|  | GLCE    |
|  | GLDC    |
|  | GLE1    |
|  | GLG1    |
|  | GLI4    |
|  | GLIS3   |
|  | GLMN    |
|  | GLO1    |
|  | GLOD4   |
|  | GLRX    |
|  | GLRX2   |
|  | GLRX3   |
|  | GLRX5   |
|  | GLS     |
|  | GLS2    |
|  | GLT25D1 |
|  | GLT8D1  |
|  | GLTP    |
|  | GLTPD1  |
|  | GLTSCR1 |
|  | GLTSCR2 |
|  | GLUD1   |
|  | GLUL    |

|  |         |
|--|---------|
|  | GLYCTK  |
|  | GM2A    |
|  | GMCL1   |
|  | GMDS    |
|  | GMEB2   |
|  | GMFB    |
|  | GMFG    |
|  | GMNN    |
|  | GMPPA   |
|  | GMPPB   |
|  | GMPR    |
|  | GMPR2   |
|  | GMPS    |
|  | GNA11   |
|  | GNA12   |
|  | GNA13   |
|  | GNAI1   |
|  | GNAI2   |
|  | GNAI3   |
|  | GNAQ    |
|  | GNAS    |
|  | GNB1    |
|  | GNB1L   |
|  | GNB2    |
|  | GNB2L1  |
|  | GNB5    |
|  | GNE     |
|  | GNG10   |
|  | GNG11   |
|  | GNG5    |
|  | GNG7    |
|  | GNL1    |
|  | GNL2    |
|  | GNL3    |
|  | GNL3L   |
|  | GNPAT   |
|  | GNPDA1  |
|  | GNPDA2  |
|  | GNPNAT1 |
|  | GNPTAB  |
|  | GNPTG   |
|  | GNRH1   |
|  | GNS     |
|  | GOLGA1  |
|  | GOLGA2  |
|  | GOLGA3  |
|  | GOLGA4  |
|  | GOLGA5  |
|  | GOLGA7  |
|  | GOLGA8B |
|  | GOLGB1  |
|  | GOLIM4  |
|  | GOLM1   |
|  | GOLPH3  |
|  | GOLPH3L |
|  | GOLPH4  |



|  |         |
|--|---------|
|  | GOLSYN  |
|  | GOLT1A  |
|  | GOLT1B  |
|  | GON4L   |
|  | GOPC    |
|  | GORASP1 |
|  | GORASP2 |
|  | GOSR1   |
|  | GOSR2   |
|  | GOT1    |
|  | GOT2    |
|  | GP1BA   |
|  | GPAA1   |
|  | GPAM    |
|  | GPATCH2 |
|  | GPATCH3 |
|  | GPATCH4 |
|  | GPBP1   |
|  | GPBP1L1 |
|  | GPC2    |
|  | GPC6    |
|  | GPD1L   |
|  | PPER    |
|  | GPHN    |
|  | GPI     |
|  | GPKOW   |
|  | GPM6A   |
|  | GPN1    |
|  | GPN2    |
|  | GPN3    |
|  | GPR1    |
|  | GPR108  |
|  | GPR125  |
|  | GPR126  |
|  | GPR128  |
|  | GPR137  |
|  | GPR137B |
|  | GPR143  |
|  | GPR162  |
|  | GPR172A |
|  | GPR175  |
|  | GPR177  |
|  | GPR180  |
|  | GPR19   |
|  | GPR37   |
|  | GPR56   |
|  | GPR89A  |
|  | GPR89B  |
|  | GPR89C  |
|  | GPR98   |
|  | GPRASP2 |
|  | GPRC5C  |
|  | GPS1    |
|  | GPS2    |
|  | GPSM1   |
|  | GPT2    |

|  |         |
|--|---------|
|  | GPX1    |
|  | GPX2    |
|  | GPX3    |
|  | GPX4    |
|  | GPX7    |
|  | GPX8    |
|  | GRAMD1A |
|  | GRAMD3  |
|  | GRAMD4  |
|  | GRB10   |
|  | GRB14   |
|  | GRB2    |
|  | GRB7    |
|  | GREB1   |
|  | GRHPR   |
|  | GRINA   |
|  | GRIPAP1 |
|  | GRK5    |
|  | GRK6    |
|  | GRM2    |
|  | GRN     |
|  | GRPEL1  |
|  | GRPEL2  |
|  | GRSF1   |
|  | GRTP1   |
|  | GRWD1   |
|  | GSDMB   |
|  | GSDMD   |
|  | GSK3B   |
|  | GSN     |
|  | GSPT1   |
|  | GSPT2   |
|  | GSR     |
|  | GSS     |
|  | GSTA1   |
|  | GSTA2   |
|  | GSTA3   |
|  | GSTA4   |
|  | GSTA5   |
|  | GSTK1   |
|  | GSTM1   |
|  | GSTM2   |
|  | GSTM3   |
|  | GSTM4   |
|  | GSTO1   |
|  | GSTO2   |
|  | GSTP1   |
|  | GSTTP2  |
|  | GSTZ1   |
|  | GTDC1   |
|  | GTF2A1  |
|  | GTF2A2  |
|  | GTF2B   |
|  | GTF2E1  |
|  | GTF2E2  |
|  | GTF2F1  |

|  |           |
|--|-----------|
|  | GTF2F2    |
|  | GTF2H1    |
|  | GTF2H2B   |
|  | GTF2H3    |
|  | GTF2H4    |
|  | GTF2H5    |
|  | GTF2I     |
|  | GTF2IP1   |
|  | GTF2IRD1  |
|  | GTF2IRD2B |
|  | GTF2IRD2P |
|  | GTF3A     |
|  | GTF3C1    |
|  | GTF3C2    |
|  | GTF3C3    |
|  | GTF3C5    |
|  | GTF3C6    |
|  | GTPBP1    |
|  | GTPBP10   |
|  | GTPBP2    |
|  | GTPBP3    |
|  | GTPBP4    |
|  | GTPBP6    |
|  | GTPBP8    |
|  | GTSE1     |
|  | GUF1      |
|  | GUK1      |
|  | GUSB      |
|  | GUSBL1    |
|  | GUSBL2    |
|  | GXYLT1    |
|  | GYG1      |
|  | GYG2      |
|  | GYPC      |
|  | H19       |
|  | H1F0      |
|  | H1FX      |
|  | H2AFJ     |
|  | H2AFV     |
|  | H2AFX     |
|  | H2AFY     |
|  | H2AFY2    |
|  | H2AFZ     |
|  | H3F3A     |
|  | H3F3B     |
|  | H6PD      |
|  | HAAO      |
|  | HABP2     |
|  | HABP4     |
|  | HACE1     |
|  | HACL1     |
|  | HADH      |
|  | HADH2     |
|  | HADHA     |
|  | HADHB     |
|  | HAGH      |

|  |         |
|--|---------|
|  | HAGHL   |
|  | HARBI1  |
|  | HARS    |
|  | HARS2   |
|  | HAS3    |
|  | HAT1    |
|  | HAUS4   |
|  | HAUS8   |
|  | HAVCR2  |
|  | HAX1    |
|  | HBEGF   |
|  | HBP1    |
|  | HBXIP   |
|  | HCCA2   |
|  | HCCS    |
|  | HCFC1   |
|  | HCFC1R1 |
|  | HCFC2   |
|  | HCG2P7  |
|  | HCG4    |
|  | HCN4    |
|  | HCP5    |
|  | HCST    |
|  | HDAC1   |
|  | HDAC11  |
|  | HDAC2   |
|  | HDAC3   |
|  | HDAC4   |
|  | HDAC6   |
|  | HDAC7A  |
|  | HDAC8   |
|  | HDDC2   |
|  | HDDC3   |
|  | HDGF    |
|  | HDGF2   |
|  | HDHD1A  |
|  | HDHD2   |
|  | HDHD3   |
|  | HEATR1  |
|  | HEATR2  |
|  | HEATR3  |
|  | HEATR5A |
|  | HEATR5B |
|  | HEATR6  |
|  | HEBP1   |
|  | HEBP2   |
|  | HECA    |
|  | HECTD1  |
|  | HECTD2  |
|  | HECTD3  |
|  | HEG1    |
|  | HELLS   |
|  | HELZ    |
|  | HEMK1   |
|  | HERC1   |
|  | HERC2   |

|  |            |
|--|------------|
|  | HERC4      |
|  | HERC5      |
|  | HERC6      |
|  | HERPUD1    |
|  | HERPUD2    |
|  | HES1       |
|  | HES4       |
|  | HES6       |
|  | HEXB       |
|  | HEXDC      |
|  | HEXIM1     |
|  | HEXIM2     |
|  | HEY1       |
|  | HEY2       |
|  | HGS        |
|  | HHATL      |
|  | HHLA3      |
|  | HIAT1      |
|  | HIATL1     |
|  | HIATL2     |
|  | HIBADH     |
|  | HIBCH      |
|  | HIC2       |
|  | HIF1A      |
|  | HIF1AN     |
|  | HIGD1A     |
|  | HIGD2A     |
|  | HINFP      |
|  | HINT1      |
|  | HINT2      |
|  | HINT3      |
|  | HIP1       |
|  | HIP1R      |
|  | HIP2       |
|  | HIPK2      |
|  | HIRA       |
|  | HIRIP3     |
|  | HISPPD2A   |
|  | HIST1H1A   |
|  | HIST1H1C   |
|  | HIST1H2AC  |
|  | HIST1H2BC  |
|  | HIST1H2BD  |
|  | HIST1H2BE  |
|  | HIST1H2BG  |
|  | HIST1H2BK  |
|  | HIST1H3F   |
|  | HIST1H4C   |
|  | HIST1H4H   |
|  | HIST1H4K   |
|  | HIST2H2AA3 |
|  | HIST2H2AA4 |
|  | HIST2H2AC  |
|  | HIST2H2BE  |
|  | HIST2H4A   |
|  | HIST2H4B   |

|  |           |
|--|-----------|
|  | HIST3H2A  |
|  | HIVEP2    |
|  | HK1       |
|  | HK2       |
|  | HKDC1     |
|  | HLA-A     |
|  | HLA-A29.1 |
|  | HLA-B     |
|  | HLA-C     |
|  | HLA-DMA   |
|  | HLA-DRA   |
|  | HLA-DRB3  |
|  | HLA-DRB4  |
|  | HLA-DRB6  |
|  | HLA-E     |
|  | HLA-F     |
|  | HLA-G     |
|  | HLA-H     |
|  | HLCS      |
|  | HLTF      |
|  | HLX       |
|  | HM13      |
|  | HMBOX1    |
|  | HMBS      |
|  | HMG20A    |
|  | HMG20B    |
|  | HMGA1     |
|  | HMGB1     |
|  | HMGB1L1   |
|  | HMGB2     |
|  | HMGB3     |
|  | HMGCL     |
|  | HMGCR     |
|  | HMGCS1    |
|  | HMGCS2    |
|  | HMGN1     |
|  | HMGN2     |
|  | HMGN3     |
|  | HMGN4     |
|  | HMGXB4    |
|  | HMOX1     |
|  | HMOX2     |
|  | HN1       |
|  | HN1L      |
|  | HNF1A     |
|  | HNF1B     |
|  | HNMT      |
|  | HNRNPA0   |
|  | HNRNPA1   |
|  | HNRNPA1L2 |
|  | HNRNPA2B1 |
|  | HNRNPA3   |
|  | HNRNPA3P1 |
|  | HNRNPAB   |
|  | HNRNPC    |
|  | HNRNPD    |

|  |           |
|--|-----------|
|  | HNRNPF    |
|  | HNRNPH1   |
|  | HNRNPH2   |
|  | HNRNPH3   |
|  | HNRNPK    |
|  | HNRNPL    |
|  | HNRNPM    |
|  | HNRNPR    |
|  | HNRNPU    |
|  | HNRNPUL1  |
|  | HNRNPUL2  |
|  | HNRPA1L-2 |
|  | HNRPA1P4  |
|  | HNRPA2B1  |
|  | HNRPC     |
|  | HNRPDL    |
|  | HNRPH1    |
|  | HNRPH3    |
|  | HNRPK     |
|  | HNRPLL    |
|  | HNRPM     |
|  | HNRPR     |
|  | HNRPUL1   |
|  | HNRPUL2   |
|  | HOMER2    |
|  | HOOK1     |
|  | HOOK2     |
|  | HOOK3     |
|  | HOXA6     |
|  | HOXB5     |
|  | HOXB6     |
|  | HOXC13    |
|  | HOXC6     |
|  | HP1BP3    |
|  | HPCAL1    |
|  | HPD       |
|  | HPGD      |
|  | HPN       |
|  | HPRT1     |
|  | HPS1      |
|  | HPS3      |
|  | HPS4      |
|  | HPS5      |
|  | HPS6      |
|  | HPX       |
|  | HRAS      |
|  | HRASLS3   |
|  | HRB       |
|  | HRH1      |
|  | HRSP12    |
|  | HS1BP3    |
|  | HS2ST1    |
|  | HS3ST3A1  |
|  | HSBP1     |
|  | HSCB      |
|  | HSD11B1L  |

|  |           |
|--|-----------|
|  | HSD11B2   |
|  | HSD17B10  |
|  | HSD17B11  |
|  | HSD17B12  |
|  | HSD17B14  |
|  | HSD17B2   |
|  | HSD17B4   |
|  | HSD17B7   |
|  | HSD17B7P2 |
|  | HSD17B8   |
|  | HSD3B7    |
|  | HSDL1     |
|  | HSDL2     |
|  | HSF2      |
|  | HSGT1     |
|  | HSP90AA1  |
|  | HSP90AB1  |
|  | HSP90B1   |
|  | HSPA13    |
|  | HSPA14    |
|  | HSPA1A    |
|  | HSPA1B    |
|  | HSPA1L    |
|  | HSPA2     |
|  | HSPA4     |
|  | HSPA4L    |
|  | HSPA5     |
|  | HSPA6     |
|  | HSPA7     |
|  | HSPA8     |
|  | HSPA9     |
|  | HSPB1     |
|  | HSPBAP1   |
|  | HSPBL2    |
|  | HSPBP1    |
|  | HSPC111   |
|  | HSPC157   |
|  | HSPC159   |
|  | HSPC171   |
|  | HSPC268   |
|  | HSPCAL3   |
|  | HSPD1     |
|  | HSPE1     |
|  | HSPH1     |
|  | HSZFP36   |
|  | HTATIP2   |
|  | HTR1E     |
|  | HTRA1     |
|  | HTRA2     |
|  | HTT       |
|  | HUS1B     |
|  | HUWE1     |
|  | HYAL1     |
|  | HYAL2     |
|  | HYAL3     |
|  | HYDIN     |



|  |         |
|--|---------|
|  | HYI     |
|  | HYLS1   |
|  | HYOU1   |
|  | IAH1    |
|  | IARS    |
|  | IARS2   |
|  | IBTK    |
|  | ICA1    |
|  | ICAM1   |
|  | ICAM3   |
|  | ICK     |
|  | ICMT    |
|  | ICT1    |
|  | ID1     |
|  | ID2     |
|  | ID2B    |
|  | ID3     |
|  | IDE     |
|  | IDH1    |
|  | IDH2    |
|  | IDH3A   |
|  | IDH3B   |
|  | IDH3G   |
|  | IDI1    |
|  | IDO2    |
|  | IDS     |
|  | IDUA    |
|  | IER2    |
|  | IER3    |
|  | IER3IP1 |
|  | IER5    |
|  | IFFO1   |
|  | IFFO2   |
|  | IFI16   |
|  | IFI27   |
|  | IFI27L1 |
|  | IFI27L2 |
|  | IFI35   |
|  | IFI6    |
|  | IFIH1   |
|  | IFIT1   |
|  | IFIT2   |
|  | IFIT5   |
|  | IFITM1  |
|  | IFITM2  |
|  | IFITM3  |
|  | IFITM4P |
|  | IFNAR1  |
|  | IFNAR2  |
|  | IFNGR1  |
|  | IFNGR2  |
|  | IFP38   |
|  | IFRD1   |
|  | IFRD2   |
|  | IFT122  |
|  | IFT20   |

|  |         |
|--|---------|
|  | IFT52   |
|  | IFT57   |
|  | IFT74   |
|  | IFT88   |
|  | IGBP1   |
|  | IGF2    |
|  | IGF2BP2 |
|  | IGF2R   |
|  | IGFBP1  |
|  | IGFBP2  |
|  | IGFBP3  |
|  | IGFBP4  |
|  | IGFBP6  |
|  | IGFBP7  |
|  | IGFBPL1 |
|  | IGHMBP2 |
|  | IGSF11  |
|  | IGSF3   |
|  | IGSF8   |
|  | IHPK3   |
|  | IK      |
|  | IKBIP   |
|  | IKBKB   |
|  | IKBKG   |
|  | IKZF2   |
|  | IKZF3   |
|  | IKZF5   |
|  | IL10    |
|  | IL10RB  |
|  | IL11RA  |
|  | IL13RA1 |
|  | IL16    |
|  | IL17RA  |
|  | IL17RB  |
|  | IL17RC  |
|  | IL17RD  |
|  | IL18    |
|  | IL18BP  |
|  | IL18R1  |
|  | IL1R1   |
|  | IL1R2   |
|  | IL1RAP  |
|  | IL21R   |
|  | IL24    |
|  | IL25    |
|  | IL27RA  |
|  | IL28RA  |
|  | IL32    |
|  | IL4R    |
|  | IL5RA   |
|  | IL8     |
|  | ILF2    |
|  | ILF3    |
|  | ILK     |
|  | ILKAP   |
|  | ILVBL   |

|  |          |
|--|----------|
|  | IMAA     |
|  | IMMP2L   |
|  | IMMT     |
|  | IMP3     |
|  | IMP4     |
|  | IMPA1    |
|  | IMPA2    |
|  | IMPAD1   |
|  | IMPDH1   |
|  | IMPDH2   |
|  | INADL    |
|  | INCA1    |
|  | INF2     |
|  | ING1     |
|  | ING2     |
|  | ING3     |
|  | ING4     |
|  | INHBE    |
|  | INO80    |
|  | INO80B   |
|  | INO80C   |
|  | INO80D   |
|  | INO80E   |
|  | INPP1    |
|  | INPP5A   |
|  | INPP5B   |
|  | INPP5E   |
|  | INPP5F   |
|  | INPP5K   |
|  | INPPL1   |
|  | INSIG1   |
|  | INSIG2   |
|  | INS-IGF2 |
|  | INSM1    |
|  | INTS1    |
|  | INTS10   |
|  | INTS12   |
|  | INTS2    |
|  | INTS3    |
|  | INTS4    |
|  | INTS5    |
|  | INTS6    |
|  | INTS7    |
|  | INTS8    |
|  | INTS9    |
|  | INVS     |
|  | IP6K1    |
|  | IP6K2    |
|  | IPO11    |
|  | IPO13    |
|  | IPO4     |
|  | IPO5     |
|  | IPO7     |
|  | IPO8     |
|  | IPO9     |
|  | IPP      |

|  |          |
|--|----------|
|  | IQCB1    |
|  | IQCC     |
|  | IQCG     |
|  | IQCK     |
|  | IQGAP1   |
|  | IQGAP2   |
|  | IQSEC1   |
|  | IRAK1    |
|  | IRAK2    |
|  | IREB2    |
|  | IRF1     |
|  | IRF2BP1  |
|  | IRF2BP2  |
|  | IRF3     |
|  | IRF4     |
|  | IRF7     |
|  | IRF8     |
|  | IRF9     |
|  | IRS1     |
|  | IRS2     |
|  | IRX1     |
|  | IRX3     |
|  | IRX5     |
|  | ISCA1    |
|  | ISCA1L   |
|  | ISCA2    |
|  | ISCU     |
|  | ISG15    |
|  | ISG20    |
|  | ISG20L1  |
|  | ISG20L2  |
|  | ISOC1    |
|  | ISOC2    |
|  | ISY1     |
|  | ISYNA1   |
|  | ITCH     |
|  | ITFG1    |
|  | ITFG2    |
|  | ITFG3    |
|  | ITGA1    |
|  | ITGA11   |
|  | ITGA2    |
|  | ITGA4    |
|  | ITGA5    |
|  | ITGA6    |
|  | ITGA7    |
|  | ITGAE    |
|  | ITGAV    |
|  | ITGB1    |
|  | ITGB1BP1 |
|  | ITGB2    |
|  | ITGB3BP  |
|  | ITGB4BP  |
|  | ITGB5    |
|  | ITIH1    |
|  | ITIH5    |

|  |          |
|--|----------|
|  | ITM2B    |
|  | ITM2C    |
|  | ITPA     |
|  | ITPK1    |
|  | ITPKA    |
|  | ITPKC    |
|  | ITPR2    |
|  | ITPR3    |
|  | ITPRIP   |
|  | ITPRIPL2 |
|  | ITSN1    |
|  | IVD      |
|  | IVNS1ABP |
|  | IWS1     |
|  | JAG1     |
|  | JAG2     |
|  | JAGN1    |
|  | JAK1     |
|  | JARID1A  |
|  | JARID1D  |
|  | JARID2   |
|  | JAZF1    |
|  | JCLN     |
|  | JDP2     |
|  | JMJD1A   |
|  | JMJD1C   |
|  | JMJD2B   |
|  | JMJD4    |
|  | JMJD6    |
|  | JMJD8    |
|  | JMY      |
|  | JOSD1    |
|  | JOSD2    |
|  | JPH2     |
|  | JTB      |
|  | JUB      |
|  | JUN      |
|  | JUND     |
|  | JUP      |
|  | KANK1    |
|  | KANK2    |
|  | KANK3    |
|  | KANK4    |
|  | KARS     |
|  | KAT2A    |
|  | KAT2B    |
|  | KAT5     |
|  | KATNA1   |
|  | KATNAL1  |
|  | KATNB1   |
|  | KBTBD11  |
|  | KBTBD2   |
|  | KBTBD3   |
|  | KBTBD4   |
|  | KBTBD7   |
|  | KBTBD8   |



|  |           |
|--|-----------|
|  | KIAA0195  |
|  | KIAA0196  |
|  | KIAA0232  |
|  | KIAA0240  |
|  | KIAA0247  |
|  | KIAA0251  |
|  | KIAA0258  |
|  | KIAA0261  |
|  | KIAA0319L |
|  | KIAA0355  |
|  | KIAA0368  |
|  | KIAA0391  |
|  | KIAA0406  |
|  | KIAA0408  |
|  | KIAA0415  |
|  | KIAA0427  |
|  | KIAA0430  |
|  | KIAA0492  |
|  | KIAA0494  |
|  | KIAA0495  |
|  | KIAA0513  |
|  | KIAA0528  |
|  | KIAA0556  |
|  | KIAA0562  |
|  | KIAA0564  |
|  | KIAA0586  |
|  | KIAA0649  |
|  | KIAA0652  |
|  | KIAA0664  |
|  | KIAA0753  |
|  | KIAA0831  |
|  | KIAA0892  |
|  | KIAA0895  |
|  | KIAA0907  |
|  | KIAA0913  |
|  | KIAA0922  |
|  | KIAA0947  |
|  | KIAA1009  |
|  | KIAA1012  |
|  | KIAA1026  |
|  | KIAA1033  |
|  | KIAA1128  |
|  | KIAA1143  |
|  | KIAA1147  |
|  | KIAA1160  |
|  | KIAA1161  |
|  | KIAA1191  |
|  | KIAA1217  |
|  | KIAA1267  |
|  | KIAA1274  |
|  | KIAA1279  |
|  | KIAA1285  |
|  | KIAA1310  |
|  | KIAA1328  |
|  | KIAA1370  |
|  | KIAA1429  |

|  |           |
|--|-----------|
|  | KIAA1430  |
|  | KIAA1468  |
|  | KIAA1522  |
|  | KIAA1530  |
|  | KIAA1539  |
|  | KIAA1543  |
|  | KIAA1545  |
|  | KIAA1586  |
|  | KIAA1598  |
|  | KIAA1600  |
|  | KIAA1602  |
|  | KIAA1618  |
|  | KIAA1632  |
|  | KIAA1671  |
|  | KIAA1683  |
|  | KIAA1688  |
|  | KIAA1704  |
|  | KIAA1712  |
|  | KIAA1715  |
|  | KIAA1731  |
|  | KIAA1737  |
|  | KIAA1751  |
|  | KIAA1826  |
|  | KIAA1862  |
|  | KIAA1875  |
|  | KIAA1949  |
|  | KIAA1958  |
|  | KIAA1967  |
|  | KIAA1984  |
|  | KIAA2010  |
|  | KIAA2013  |
|  | KIAA2026  |
|  | KIDINS220 |
|  | KIF13B    |
|  | KIF1A     |
|  | KIF1B     |
|  | KIF1C     |
|  | KIF20B    |
|  | KIF21A    |
|  | KIF22     |
|  | KIF2A     |
|  | KIF3B     |
|  | KIF5B     |
|  | KIFAP3    |
|  | KIFC2     |
|  | KLB       |
|  | KLC1      |
|  | KLF11     |
|  | KLF12     |
|  | KLF13     |
|  | KLF15     |
|  | KLF2      |
|  | KLF3      |
|  | KLF4      |
|  | KLF6      |
|  | KLF9      |



|  |            |
|--|------------|
|  | KLHDC2     |
|  | KLHDC3     |
|  | KLHDC4     |
|  | KLHDC5     |
|  | KLHDC8B    |
|  | KLHDC9     |
|  | KLHL12     |
|  | KLHL13     |
|  | KLHL18     |
|  | KLHL2      |
|  | KLHL20     |
|  | KLHL21     |
|  | KLHL22     |
|  | KLHL24     |
|  | KLHL26     |
|  | KLHL28     |
|  | KLHL29     |
|  | KLHL3      |
|  | KLHL36     |
|  | KLHL5      |
|  | KLHL7      |
|  | KLHL8      |
|  | KLHL9      |
|  | KLRAQ1     |
|  | KLRG1      |
|  | KNCN       |
|  | KPNA1      |
|  | KPNA2      |
|  | KPNA3      |
|  | KPNA4      |
|  | KPNA6      |
|  | KPNB1      |
|  | KPTN       |
|  | KRAS       |
|  | KRBA1      |
|  | KRCC1      |
|  | KREMEN1    |
|  | KRIT1      |
|  | KRR1       |
|  | KRT10      |
|  | KRT18      |
|  | KRT18P13   |
|  | KRT18P17   |
|  | KRT18P28   |
|  | KRT19      |
|  | KRT8       |
|  | KRT8P9     |
|  | KRTAP10-11 |
|  | KRTAP10-2  |
|  | KRTAP4-8   |
|  | KRTCAP2    |
|  | KRTCAP3    |
|  | KSR2       |
|  | KTELC1     |
|  | KTI12      |
|  | KTN1       |

|  |         |
|--|---------|
|  | KYNU    |
|  | L2HGDH  |
|  | L3MBTL2 |
|  | L3MBTL3 |
|  | LACTB   |
|  | LACTB2  |
|  | LAD1    |
|  | LAGE3   |
|  | LAIR1   |
|  | LAMA5   |
|  | LAMB1   |
|  | LAMB2   |
|  | LAMC1   |
|  | LAMP1   |
|  | LAMP2   |
|  | LAMP3   |
|  | LANCL1  |
|  | LANCL2  |
|  | LAP3    |
|  | LPTM4A  |
|  | LPTM4B  |
|  | LARGE   |
|  | LARP1   |
|  | LARP1B  |
|  | LARP4   |
|  | LARP4B  |
|  | LARP7   |
|  | LARS    |
|  | LARS2   |
|  | LAS1L   |
|  | LASP1   |
|  | LASS2   |
|  | LASS4   |
|  | LASS5   |
|  | LASS6   |
|  | LBA1    |
|  | LBH     |
|  | LBR     |
|  | LBX2    |
|  | LCAT    |
|  | LCLAT1  |
|  | LCMT1   |
|  | LCMT2   |
|  | LCN1L1  |
|  | LCOR    |
|  | LCP1    |
|  | LDB2    |
|  | LDHA    |
|  | LDHB    |
|  | LDLR    |
|  | LDLRAP1 |
|  | LDOC1L  |
|  | LEAP2   |
|  | LEMD2   |
|  | LEMD3   |
|  | LENG1   |

|  |          |
|--|----------|
|  | LEO1     |
|  | LEP      |
|  | LEPR     |
|  | LEPRE1   |
|  | LEPROT   |
|  | LEPROTL1 |
|  | LETM1    |
|  | LETMD1   |
|  | LFNG     |
|  | LGALS1   |
|  | LGALS3   |
|  | LGALS3BP |
|  | LGALS8   |
|  | LGMN     |
|  | LGTN     |
|  | LHFP     |
|  | LHFPL2   |
|  | LHPP     |
|  | LIAS     |
|  | LIF      |
|  | LIG1     |
|  | LIG3     |
|  | LIG4     |
|  | LILRB1   |
|  | LILRB3   |
|  | LIMA1    |
|  | LIMCH1   |
|  | LIME1    |
|  | LIMS1    |
|  | LIMS2    |
|  | LIN37    |
|  | LIN52    |
|  | LIN54    |
|  | LIN7A    |
|  | LIN7C    |
|  | LINS1    |
|  | LIPA     |
|  | LIPC     |
|  | LIPG     |
|  | LIPT1    |
|  | LITAF    |
|  | LIX1     |
|  | LIX1L    |
|  | LLGL1    |
|  | LLGL2    |
|  | LLPH     |
|  | LMAN1    |
|  | LMAN2    |
|  | LMAN2L   |
|  | LMBR1    |
|  | LMBRD1   |
|  | LMCD1    |
|  | LMF2     |
|  | LMNA     |
|  | LMNB2    |
|  | LMO4     |

|  |              |
|--|--------------|
|  | LMOD3        |
|  | LMTK3        |
|  | LNPEP        |
|  | LN2          |
|  | LOC100008588 |
|  | LOC100008589 |
|  | LOC100009676 |
|  | LOC100049716 |
|  | LOC100125556 |
|  | LOC100127893 |
|  | LOC100127894 |
|  | LOC100127913 |
|  | LOC100127918 |
|  | LOC100127922 |
|  | LOC100127975 |
|  | LOC100127982 |
|  | LOC100127993 |
|  | LOC100128002 |
|  | LOC100128007 |
|  | LOC100128016 |
|  | LOC100128056 |
|  | LOC100128060 |
|  | LOC100128062 |
|  | LOC100128083 |
|  | LOC100128084 |
|  | LOC100128086 |
|  | LOC100128098 |
|  | LOC100128115 |
|  | LOC100128126 |
|  | LOC100128163 |
|  | LOC100128168 |
|  | LOC100128196 |
|  | LOC100128221 |
|  | LOC100128266 |
|  | LOC100128274 |
|  | LOC100128288 |
|  | LOC100128291 |
|  | LOC100128309 |
|  | LOC100128326 |
|  | LOC100128337 |
|  | LOC100128353 |
|  | LOC100128356 |
|  | LOC100128392 |
|  | LOC100128410 |
|  | LOC100128423 |
|  | LOC100128425 |
|  | LOC100128440 |
|  | LOC100128460 |
|  | LOC100128469 |
|  | LOC100128485 |
|  | LOC100128498 |
|  | LOC100128505 |
|  | LOC100128507 |
|  | LOC100128510 |
|  | LOC100128525 |
|  | LOC100128528 |

|  |              |
|--|--------------|
|  | LOC100128547 |
|  | LOC100128548 |
|  | LOC100128585 |
|  | LOC100128627 |
|  | LOC100128672 |
|  | LOC100128689 |
|  | LOC100128731 |
|  | LOC100128760 |
|  | LOC100128771 |
|  | LOC100128775 |
|  | LOC100128805 |
|  | LOC100128816 |
|  | LOC100128836 |
|  | LOC100128883 |
|  | LOC100128893 |
|  | LOC100128899 |
|  | LOC100128918 |
|  | LOC100128936 |
|  | LOC100128975 |
|  | LOC100128994 |
|  | LOC100129022 |
|  | LOC100129027 |
|  | LOC100129028 |
|  | LOC100129034 |
|  | LOC100129055 |
|  | LOC100129067 |
|  | LOC100129086 |
|  | LOC100129093 |
|  | LOC100129094 |
|  | LOC100129104 |
|  | LOC100129118 |
|  | LOC100129139 |
|  | LOC100129141 |
|  | LOC100129158 |
|  | LOC100129201 |
|  | LOC100129203 |
|  | LOC100129211 |
|  | LOC100129237 |
|  | LOC100129243 |
|  | LOC100129267 |
|  | LOC100129269 |
|  | LOC100129295 |
|  | LOC100129297 |
|  | LOC100129303 |
|  | LOC100129335 |
|  | LOC100129362 |
|  | LOC100129379 |
|  | LOC100129424 |
|  | LOC100129426 |
|  | LOC100129441 |
|  | LOC100129478 |
|  | LOC100129502 |
|  | LOC100129518 |
|  | LOC100129522 |
|  | LOC100129539 |
|  | LOC100129543 |

|  |              |
|--|--------------|
|  | LOC100129550 |
|  | LOC100129552 |
|  | LOC100129553 |
|  | LOC100129566 |
|  | LOC100129585 |
|  | LOC100129599 |
|  | LOC100129608 |
|  | LOC100129630 |
|  | LOC100129645 |
|  | LOC100129650 |
|  | LOC100129657 |
|  | LOC100129668 |
|  | LOC100129673 |
|  | LOC100129681 |
|  | LOC100129685 |
|  | LOC100129697 |
|  | LOC100129716 |
|  | LOC100129742 |
|  | LOC100129758 |
|  | LOC100129759 |
|  | LOC100129781 |
|  | LOC100129828 |
|  | LOC100129866 |
|  | LOC100129882 |
|  | LOC100129890 |
|  | LOC100129902 |
|  | LOC100129906 |
|  | LOC100129907 |
|  | LOC100129934 |
|  | LOC100129952 |
|  | LOC100129958 |
|  | LOC100129960 |
|  | LOC100129975 |
|  | LOC100129982 |
|  | LOC100130003 |
|  | LOC100130053 |
|  | LOC100130070 |
|  | LOC100130071 |
|  | LOC100130092 |
|  | LOC100130093 |
|  | LOC100130131 |
|  | LOC100130138 |
|  | LOC100130154 |
|  | LOC100130168 |
|  | LOC100130171 |
|  | LOC100130178 |
|  | LOC100130190 |
|  | LOC100130233 |
|  | LOC100130263 |
|  | LOC100130276 |
|  | LOC100130289 |
|  | LOC100130291 |
|  | LOC100130308 |
|  | LOC100130332 |
|  | LOC100130353 |
|  | LOC100130445 |

|  |              |
|--|--------------|
|  | LOC100130446 |
|  | LOC100130476 |
|  | LOC100130511 |
|  | LOC100130516 |
|  | LOC100130522 |
|  | LOC100130550 |
|  | LOC100130552 |
|  | LOC100130553 |
|  | LOC100130556 |
|  | LOC100130561 |
|  | LOC100130562 |
|  | LOC100130598 |
|  | LOC100130604 |
|  | LOC100130623 |
|  | LOC100130624 |
|  | LOC100130633 |
|  | LOC100130701 |
|  | LOC100130707 |
|  | LOC100130715 |
|  | LOC100130746 |
|  | LOC100130750 |
|  | LOC100130764 |
|  | LOC100130775 |
|  | LOC100130802 |
|  | LOC100130818 |
|  | LOC100130835 |
|  | LOC100130837 |
|  | LOC100130856 |
|  | LOC100130886 |
|  | LOC100130892 |
|  | LOC100130905 |
|  | LOC100130914 |
|  | LOC100130919 |
|  | LOC100130932 |
|  | LOC100130934 |
|  | LOC100130980 |
|  | LOC100131009 |
|  | LOC100131085 |
|  | LOC100131096 |
|  | LOC100131160 |
|  | LOC100131166 |
|  | LOC100131187 |
|  | LOC100131196 |
|  | LOC100131205 |
|  | LOC100131261 |
|  | LOC100131294 |
|  | LOC100131308 |
|  | LOC100131323 |
|  | LOC100131336 |
|  | LOC100131349 |
|  | LOC100131360 |
|  | LOC100131368 |
|  | LOC100131381 |
|  | LOC100131387 |
|  | LOC100131403 |
|  | LOC100131452 |

|  |              |
|--|--------------|
|  | LOC100131510 |
|  | LOC100131526 |
|  | LOC100131530 |
|  | LOC100131531 |
|  | LOC100131541 |
|  | LOC100131572 |
|  | LOC100131609 |
|  | LOC100131643 |
|  | LOC100131655 |
|  | LOC100131672 |
|  | LOC100131675 |
|  | LOC100131713 |
|  | LOC100131718 |
|  | LOC100131735 |
|  | LOC100131737 |
|  | LOC100131744 |
|  | LOC100131767 |
|  | LOC100131785 |
|  | LOC100131786 |
|  | LOC100131787 |
|  | LOC100131801 |
|  | LOC100131810 |
|  | LOC100131835 |
|  | LOC100131850 |
|  | LOC100131859 |
|  | LOC100131866 |
|  | LOC100131905 |
|  | LOC100131940 |
|  | LOC100131970 |
|  | LOC100131971 |
|  | LOC100131980 |
|  | LOC100131989 |
|  | LOC100132024 |
|  | LOC100132032 |
|  | LOC100132037 |
|  | LOC100132086 |
|  | LOC100132106 |
|  | LOC100132139 |
|  | LOC100132199 |
|  | LOC100132213 |
|  | LOC100132247 |
|  | LOC100132266 |
|  | LOC100132291 |
|  | LOC100132299 |
|  | LOC100132308 |
|  | LOC100132323 |
|  | LOC100132324 |
|  | LOC100132347 |
|  | LOC100132352 |
|  | LOC100132369 |
|  | LOC100132391 |
|  | LOC100132394 |
|  | LOC100132418 |
|  | LOC100132425 |
|  | LOC100132444 |
|  | LOC100132457 |



|  |              |
|--|--------------|
|  | LOC100132474 |
|  | LOC100132485 |
|  | LOC100132488 |
|  | LOC100132493 |
|  | LOC100132496 |
|  | LOC100132499 |
|  | LOC100132503 |
|  | LOC100132510 |
|  | LOC100132513 |
|  | LOC100132519 |
|  | LOC100132526 |
|  | LOC100132528 |
|  | LOC100132535 |
|  | LOC100132547 |
|  | LOC100132564 |
|  | LOC100132585 |
|  | LOC100132593 |
|  | LOC100132652 |
|  | LOC100132657 |
|  | LOC100132658 |
|  | LOC100132673 |
|  | LOC100132705 |
|  | LOC100132715 |
|  | LOC100132717 |
|  | LOC100132727 |
|  | LOC100132728 |
|  | LOC100132740 |
|  | LOC100132742 |
|  | LOC100132761 |
|  | LOC100132767 |
|  | LOC100132773 |
|  | LOC100132774 |
|  | LOC100132787 |
|  | LOC100132795 |
|  | LOC100132797 |
|  | LOC100132804 |
|  | LOC100132805 |
|  | LOC100132829 |
|  | LOC100132863 |
|  | LOC100132894 |
|  | LOC100132909 |
|  | LOC100132918 |
|  | LOC100132992 |
|  | LOC100133008 |
|  | LOC100133012 |
|  | LOC100133017 |
|  | LOC100133019 |
|  | LOC100133036 |
|  | LOC100133045 |
|  | LOC100133055 |
|  | LOC100133129 |
|  | LOC100133163 |
|  | LOC100133177 |
|  | LOC100133185 |
|  | LOC100133222 |
|  | LOC100133224 |

|  |              |
|--|--------------|
|  | LOC100133232 |
|  | LOC100133233 |
|  | LOC100133264 |
|  | LOC100133273 |
|  | LOC100133277 |
|  | LOC100133298 |
|  | LOC100133328 |
|  | LOC100133329 |
|  | LOC100133372 |
|  | LOC100133390 |
|  | LOC100133402 |
|  | LOC100133465 |
|  | LOC100133477 |
|  | LOC100133478 |
|  | LOC100133489 |
|  | LOC100133516 |
|  | LOC100133517 |
|  | LOC100133565 |
|  | LOC100133578 |
|  | LOC100133600 |
|  | LOC100133607 |
|  | LOC100133609 |
|  | LOC100133649 |
|  | LOC100133662 |
|  | LOC100133692 |
|  | LOC100133697 |
|  | LOC100133758 |
|  | LOC100133772 |
|  | LOC100133773 |
|  | LOC100133795 |
|  | LOC100133800 |
|  | LOC100133803 |
|  | LOC100133812 |
|  | LOC100133823 |
|  | LOC100133836 |
|  | LOC100133840 |
|  | LOC100133851 |
|  | LOC100133876 |
|  | LOC100133888 |
|  | LOC100133916 |
|  | LOC100133923 |
|  | LOC100133930 |
|  | LOC100133931 |
|  | LOC100133950 |
|  | LOC100133999 |
|  | LOC100134011 |
|  | LOC100134018 |
|  | LOC100134053 |
|  | LOC100134083 |
|  | LOC100134108 |
|  | LOC100134122 |
|  | LOC100134134 |
|  | LOC100134144 |
|  | LOC100134147 |
|  | LOC100134159 |
|  | LOC100134182 |

|  |              |
|--|--------------|
|  | LOC100134188 |
|  | LOC100134189 |
|  | LOC100134209 |
|  | LOC100134253 |
|  | LOC100134273 |
|  | LOC100134291 |
|  | LOC100134300 |
|  | LOC100134304 |
|  | LOC100134361 |
|  | LOC100134364 |
|  | LOC100134393 |
|  | LOC100134436 |
|  | LOC100134440 |
|  | LOC100134468 |
|  | LOC100134504 |
|  | LOC100134530 |
|  | LOC100134537 |
|  | LOC100134540 |
|  | LOC100134584 |
|  | LOC100134634 |
|  | LOC100134648 |
|  | LOC100134868 |
|  | LOC100190938 |
|  | LOC100190939 |
|  | LOC100190986 |
|  | LOC113230    |
|  | LOC113386    |
|  | LOC123688    |
|  | LOC124512    |
|  | LOC126235    |
|  | LOC127295    |
|  | LOC128192    |
|  | LOC130773    |
|  | LOC131691    |
|  | LOC132241    |
|  | LOC134997    |
|  | LOC136143    |
|  | LOC137107    |
|  | LOC143543    |
|  | LOC143666    |
|  | LOC144438    |
|  | LOC145853    |
|  | LOC146053    |
|  | LOC146177    |
|  | LOC146517    |
|  | LOC146909    |
|  | LOC147727    |
|  | LOC147804    |
|  | LOC148413    |
|  | LOC148430    |
|  | LOC148915    |
|  | LOC149134    |
|  | LOC149448    |
|  | LOC149501    |
|  | LOC150051    |
|  | LOC150568    |

|  |           |
|--|-----------|
|  | LOC151162 |
|  | LOC151579 |
|  | LOC152195 |
|  | LOC152217 |
|  | LOC158160 |
|  | LOC158301 |
|  | LOC158345 |
|  | LOC161527 |
|  | LOC163233 |
|  | LOC196752 |
|  | LOC200030 |
|  | LOC201229 |
|  | LOC201725 |
|  | LOC202051 |
|  | LOC202227 |
|  | LOC202781 |
|  | LOC203547 |
|  | LOC205251 |
|  | LOC220433 |
|  | LOC220686 |
|  | LOC221710 |
|  | LOC23117  |
|  | LOC253039 |
|  | LOC255167 |
|  | LOC255275 |
|  | LOC255326 |
|  | LOC255783 |
|  | LOC257396 |
|  | LOC25845  |
|  | LOC283267 |
|  | LOC283412 |
|  | LOC283481 |
|  | LOC283788 |
|  | LOC283849 |
|  | LOC283953 |
|  | LOC283999 |
|  | LOC284167 |
|  | LOC284230 |
|  | LOC284393 |
|  | LOC284422 |
|  | LOC284821 |
|  | LOC284988 |
|  | LOC285053 |
|  | LOC285074 |
|  | LOC285176 |
|  | LOC285550 |
|  | LOC285733 |
|  | LOC285741 |
|  | LOC285900 |
|  | LOC286016 |
|  | LOC286157 |
|  | LOC286208 |
|  | LOC286444 |
|  | LOC286467 |
|  | LOC286512 |
|  | LOC338758 |

|  |           |
|--|-----------|
|  | LOC338870 |
|  | LOC339290 |
|  | LOC339352 |
|  | LOC339778 |
|  | LOC339804 |
|  | LOC339843 |
|  | LOC339970 |
|  | LOC340260 |
|  | LOC340274 |
|  | LOC340598 |
|  | LOC341230 |
|  | LOC341315 |
|  | LOC341457 |
|  | LOC341784 |
|  | LOC341965 |
|  | LOC342994 |
|  | LOC343184 |
|  | LOC344328 |
|  | LOC345041 |
|  | LOC345645 |
|  | LOC346085 |
|  | LOC346950 |
|  | LOC347292 |
|  | LOC347376 |
|  | LOC347544 |
|  | LOC374395 |
|  | LOC387703 |
|  | LOC387753 |
|  | LOC387763 |
|  | LOC387790 |
|  | LOC387791 |
|  | LOC387820 |
|  | LOC387825 |
|  | LOC387841 |
|  | LOC387867 |
|  | LOC387882 |
|  | LOC387930 |
|  | LOC388076 |
|  | LOC388122 |
|  | LOC388275 |
|  | LOC388282 |
|  | LOC388339 |
|  | LOC388344 |
|  | LOC388401 |
|  | LOC388474 |
|  | LOC388524 |
|  | LOC388532 |
|  | LOC388556 |
|  | LOC388564 |
|  | LOC388588 |
|  | LOC388621 |
|  | LOC388654 |
|  | LOC388707 |
|  | LOC388720 |
|  | LOC388789 |
|  | LOC388796 |

|  |           |
|--|-----------|
|  | LOC388814 |
|  | LOC388907 |
|  | LOC388969 |
|  | LOC389049 |
|  | LOC389101 |
|  | LOC389137 |
|  | LOC389141 |
|  | LOC389156 |
|  | LOC389168 |
|  | LOC389203 |
|  | LOC389223 |
|  | LOC389286 |
|  | LOC389293 |
|  | LOC389322 |
|  | LOC389342 |
|  | LOC389386 |
|  | LOC389404 |
|  | LOC389435 |
|  | LOC389517 |
|  | LOC389599 |
|  | LOC389662 |
|  | LOC389672 |
|  | LOC389765 |
|  | LOC389787 |
|  | LOC389873 |
|  | LOC389901 |
|  | LOC390183 |
|  | LOC390251 |
|  | LOC390298 |
|  | LOC390345 |
|  | LOC390354 |
|  | LOC390466 |
|  | LOC390530 |
|  | LOC390557 |
|  | LOC390578 |
|  | LOC390660 |
|  | LOC390671 |
|  | LOC390735 |
|  | LOC390876 |
|  | LOC390956 |
|  | LOC391019 |
|  | LOC391044 |
|  | LOC391075 |
|  | LOC391126 |
|  | LOC391132 |
|  | LOC391169 |
|  | LOC391334 |
|  | LOC391370 |
|  | LOC391532 |
|  | LOC391578 |
|  | LOC391655 |
|  | LOC391656 |
|  | LOC391670 |
|  | LOC391692 |
|  | LOC391769 |
|  | LOC391777 |

|  |           |
|--|-----------|
|  | LOC391811 |
|  | LOC391825 |
|  | LOC391833 |
|  | LOC392008 |
|  | LOC392285 |
|  | LOC392301 |
|  | LOC392437 |
|  | LOC392501 |
|  | LOC392522 |
|  | LOC392713 |
|  | LOC392871 |
|  | LOC399491 |
|  | LOC399744 |
|  | LOC399748 |
|  | LOC399804 |
|  | LOC399881 |
|  | LOC399900 |
|  | LOC399942 |
|  | LOC399959 |
|  | LOC399965 |
|  | LOC399988 |
|  | LOC400013 |
|  | LOC400027 |
|  | LOC400061 |
|  | LOC400145 |
|  | LOC400304 |
|  | LOC400389 |
|  | LOC400446 |
|  | LOC400455 |
|  | LOC400506 |
|  | LOC400652 |
|  | LOC400657 |
|  | LOC400713 |
|  | LOC400721 |
|  | LOC400750 |
|  | LOC400890 |
|  | LOC400948 |
|  | LOC400963 |
|  | LOC401010 |
|  | LOC401019 |
|  | LOC401076 |
|  | LOC401098 |
|  | LOC401115 |
|  | LOC401127 |
|  | LOC401152 |
|  | LOC401206 |
|  | LOC401218 |
|  | LOC401238 |
|  | LOC401321 |
|  | LOC401357 |
|  | LOC401397 |
|  | LOC401537 |
|  | LOC401561 |
|  | LOC401640 |
|  | LOC401648 |
|  | LOC401676 |

|  |           |
|--|-----------|
|  | LOC401677 |
|  | LOC401717 |
|  | LOC401720 |
|  | LOC401817 |
|  | LOC401847 |
|  | LOC402057 |
|  | LOC402112 |
|  | LOC402175 |
|  | LOC402221 |
|  | LOC402251 |
|  | LOC402342 |
|  | LOC402509 |
|  | LOC402560 |
|  | LOC402562 |
|  | LOC402644 |
|  | LOC402677 |
|  | LOC402694 |
|  | LOC407835 |
|  | LOC439950 |
|  | LOC439953 |
|  | LOC439992 |
|  | LOC439994 |
|  | LOC440027 |
|  | LOC440043 |
|  | LOC440055 |
|  | LOC440063 |
|  | LOC440093 |
|  | LOC440157 |
|  | LOC440280 |
|  | LOC440311 |
|  | LOC440341 |
|  | LOC440345 |
|  | LOC440348 |
|  | LOC440349 |
|  | LOC440353 |
|  | LOC440354 |
|  | LOC440359 |
|  | LOC440366 |
|  | LOC440389 |
|  | LOC440396 |
|  | LOC440487 |
|  | LOC440498 |
|  | LOC440509 |
|  | LOC440525 |
|  | LOC440563 |
|  | LOC440575 |
|  | LOC440589 |
|  | LOC440595 |
|  | LOC440704 |
|  | LOC440731 |
|  | LOC440733 |
|  | LOC440737 |
|  | LOC440748 |
|  | LOC440776 |
|  | LOC440895 |
|  | LOC440926 |



|  |           |
|--|-----------|
|  | LOC440927 |
|  | LOC440957 |
|  | LOC440991 |
|  | LOC440993 |
|  | LOC441009 |
|  | LOC441013 |
|  | LOC441019 |
|  | LOC441032 |
|  | LOC441034 |
|  | LOC441050 |
|  | LOC441073 |
|  | LOC441087 |
|  | LOC441089 |
|  | LOC441124 |
|  | LOC441131 |
|  | LOC441150 |
|  | LOC441154 |
|  | LOC441155 |
|  | LOC441191 |
|  | LOC441241 |
|  | LOC441246 |
|  | LOC441251 |
|  | LOC441253 |
|  | LOC441377 |
|  | LOC441378 |
|  | LOC441408 |
|  | LOC441426 |
|  | LOC441453 |
|  | LOC441454 |
|  | LOC441455 |
|  | LOC441461 |
|  | LOC441481 |
|  | LOC441484 |
|  | LOC441506 |
|  | LOC441550 |
|  | LOC441632 |
|  | LOC441642 |
|  | LOC441743 |
|  | LOC441763 |
|  | LOC441775 |
|  | LOC441876 |
|  | LOC441896 |
|  | LOC442064 |
|  | LOC442153 |
|  | LOC442162 |
|  | LOC442180 |
|  | LOC442232 |
|  | LOC442270 |
|  | LOC442421 |
|  | LOC442442 |
|  | LOC442454 |
|  | LOC442582 |
|  | LOC442727 |
|  | LOC550643 |
|  | LOC552889 |
|  | LOC553158 |

|  |           |
|--|-----------|
|  | LOC554203 |
|  | LOC554206 |
|  | LOC572558 |
|  | LOC613037 |
|  | LOC641298 |
|  | LOC641367 |
|  | LOC641727 |
|  | LOC641746 |
|  | LOC641750 |
|  | LOC641768 |
|  | LOC641798 |
|  | LOC641802 |
|  | LOC641814 |
|  | LOC641819 |
|  | LOC641820 |
|  | LOC641844 |
|  | LOC641848 |
|  | LOC641849 |
|  | LOC641972 |
|  | LOC641992 |
|  | LOC641996 |
|  | LOC642017 |
|  | LOC642031 |
|  | LOC642033 |
|  | LOC642076 |
|  | LOC642082 |
|  | LOC642197 |
|  | LOC642210 |
|  | LOC642236 |
|  | LOC642250 |
|  | LOC642255 |
|  | LOC642299 |
|  | LOC642333 |
|  | LOC642357 |
|  | LOC642361 |
|  | LOC642367 |
|  | LOC642377 |
|  | LOC642393 |
|  | LOC642443 |
|  | LOC642446 |
|  | LOC642449 |
|  | LOC642468 |
|  | LOC642469 |
|  | LOC642489 |
|  | LOC642502 |
|  | LOC642513 |
|  | LOC642567 |
|  | LOC642585 |
|  | LOC642590 |
|  | LOC642691 |
|  | LOC642726 |
|  | LOC642738 |
|  | LOC642741 |
|  | LOC642755 |
|  | LOC642771 |
|  | LOC642784 |

|  |           |
|--|-----------|
|  | LOC642815 |
|  | LOC642817 |
|  | LOC642828 |
|  | LOC642838 |
|  | LOC642892 |
|  | LOC642897 |
|  | LOC642921 |
|  | LOC642934 |
|  | LOC642946 |
|  | LOC642947 |
|  | LOC642956 |
|  | LOC642975 |
|  | LOC642981 |
|  | LOC642989 |
|  | LOC643007 |
|  | LOC643011 |
|  | LOC643031 |
|  | LOC643035 |
|  | LOC643123 |
|  | LOC643167 |
|  | LOC643176 |
|  | LOC643206 |
|  | LOC643220 |
|  | LOC643224 |
|  | LOC643284 |
|  | LOC643287 |
|  | LOC643300 |
|  | LOC643308 |
|  | LOC643310 |
|  | LOC643319 |
|  | LOC643336 |
|  | LOC643357 |
|  | LOC643358 |
|  | LOC643384 |
|  | LOC643387 |
|  | LOC643431 |
|  | LOC643433 |
|  | LOC643438 |
|  | LOC643446 |
|  | LOC643452 |
|  | LOC643507 |
|  | LOC643509 |
|  | LOC643531 |
|  | LOC643534 |
|  | LOC643665 |
|  | LOC643668 |
|  | LOC643778 |
|  | LOC643779 |
|  | LOC643790 |
|  | LOC643802 |
|  | LOC643856 |
|  | LOC643863 |
|  | LOC643870 |
|  | LOC643873 |
|  | LOC643882 |
|  | LOC643894 |

|  |           |
|--|-----------|
|  | LOC643905 |
|  | LOC643911 |
|  | LOC643949 |
|  | LOC643960 |
|  | LOC643995 |
|  | LOC643997 |
|  | LOC644029 |
|  | LOC644033 |
|  | LOC644037 |
|  | LOC644039 |
|  | LOC644063 |
|  | LOC644075 |
|  | LOC644096 |
|  | LOC644101 |
|  | LOC644124 |
|  | LOC644128 |
|  | LOC644131 |
|  | LOC644132 |
|  | LOC644162 |
|  | LOC644172 |
|  | LOC644191 |
|  | LOC644214 |
|  | LOC644237 |
|  | LOC644250 |
|  | LOC644256 |
|  | LOC644265 |
|  | LOC644310 |
|  | LOC644315 |
|  | LOC644322 |
|  | LOC644330 |
|  | LOC644338 |
|  | LOC644360 |
|  | LOC644363 |
|  | LOC644380 |
|  | LOC644384 |
|  | LOC644422 |
|  | LOC644423 |
|  | LOC644464 |
|  | LOC644482 |
|  | LOC644511 |
|  | LOC644517 |
|  | LOC644563 |
|  | LOC644591 |
|  | LOC644604 |
|  | LOC644615 |
|  | LOC644619 |
|  | LOC644634 |
|  | LOC644642 |
|  | LOC644670 |
|  | LOC644684 |
|  | LOC644694 |
|  | LOC644739 |
|  | LOC644743 |
|  | LOC644745 |
|  | LOC644761 |
|  | LOC644762 |

|  |           |
|--|-----------|
|  | LOC644774 |
|  | LOC644790 |
|  | LOC644799 |
|  | LOC644809 |
|  | LOC644816 |
|  | LOC644852 |
|  | LOC644860 |
|  | LOC644863 |
|  | LOC644869 |
|  | LOC644877 |
|  | LOC644879 |
|  | LOC644889 |
|  | LOC644907 |
|  | LOC644914 |
|  | LOC644928 |
|  | LOC644931 |
|  | LOC644934 |
|  | LOC644935 |
|  | LOC644936 |
|  | LOC644937 |
|  | LOC644949 |
|  | LOC644950 |
|  | LOC644979 |
|  | LOC644988 |
|  | LOC644990 |
|  | LOC645015 |
|  | LOC645018 |
|  | LOC645058 |
|  | LOC645086 |
|  | LOC645094 |
|  | LOC645100 |
|  | LOC645138 |
|  | LOC645157 |
|  | LOC645166 |
|  | LOC645173 |
|  | LOC645174 |
|  | LOC645175 |
|  | LOC645176 |
|  | LOC645231 |
|  | LOC645233 |
|  | LOC645236 |
|  | LOC645251 |
|  | LOC645289 |
|  | LOC645296 |
|  | LOC645313 |
|  | LOC645317 |
|  | LOC645332 |
|  | LOC645351 |
|  | LOC645362 |
|  | LOC645378 |
|  | LOC645381 |
|  | LOC645385 |
|  | LOC645387 |
|  | LOC645430 |
|  | LOC645436 |
|  | LOC645452 |

|  |           |
|--|-----------|
|  | LOC645466 |
|  | LOC645489 |
|  | LOC645515 |
|  | LOC645586 |
|  | LOC645605 |
|  | LOC645609 |
|  | LOC645630 |
|  | LOC645671 |
|  | LOC645683 |
|  | LOC645688 |
|  | LOC645691 |
|  | LOC645693 |
|  | LOC645715 |
|  | LOC645737 |
|  | LOC645762 |
|  | LOC645895 |
|  | LOC645899 |
|  | LOC645904 |
|  | LOC645937 |
|  | LOC645968 |
|  | LOC645969 |
|  | LOC645979 |
|  | LOC646034 |
|  | LOC646044 |
|  | LOC646093 |
|  | LOC646103 |
|  | LOC646135 |
|  | LOC646195 |
|  | LOC646197 |
|  | LOC646200 |
|  | LOC646214 |
|  | LOC646278 |
|  | LOC646294 |
|  | LOC646301 |
|  | LOC646316 |
|  | LOC646347 |
|  | LOC646350 |
|  | LOC646403 |
|  | LOC646463 |
|  | LOC646476 |
|  | LOC646483 |
|  | LOC646508 |
|  | LOC646527 |
|  | LOC646531 |
|  | LOC646547 |
|  | LOC646567 |
|  | LOC646630 |
|  | LOC646672 |
|  | LOC646688 |
|  | LOC646723 |
|  | LOC646746 |
|  | LOC646753 |
|  | LOC646766 |
|  | LOC646783 |
|  | LOC646784 |
|  | LOC646785 |

|  |           |
|--|-----------|
|  | LOC646786 |
|  | LOC646791 |
|  | LOC646819 |
|  | LOC646821 |
|  | LOC646836 |
|  | LOC646841 |
|  | LOC646849 |
|  | LOC646897 |
|  | LOC646900 |
|  | LOC646909 |
|  | LOC646936 |
|  | LOC646942 |
|  | LOC646949 |
|  | LOC646956 |
|  | LOC646966 |
|  | LOC646981 |
|  | LOC646993 |
|  | LOC646996 |
|  | LOC647000 |
|  | LOC647009 |
|  | LOC647030 |
|  | LOC647037 |
|  | LOC647074 |
|  | LOC647081 |
|  | LOC647086 |
|  | LOC647099 |
|  | LOC647104 |
|  | LOC647150 |
|  | LOC647169 |
|  | LOC647243 |
|  | LOC647276 |
|  | LOC647285 |
|  | LOC647302 |
|  | LOC647307 |
|  | LOC647322 |
|  | LOC647340 |
|  | LOC647346 |
|  | LOC647349 |
|  | LOC647361 |
|  | LOC647363 |
|  | LOC647389 |
|  | LOC647436 |
|  | LOC647450 |
|  | LOC647456 |
|  | LOC647597 |
|  | LOC647650 |
|  | LOC647673 |
|  | LOC647691 |
|  | LOC647741 |
|  | LOC647834 |
|  | LOC647856 |
|  | LOC647859 |
|  | LOC647886 |
|  | LOC647949 |
|  | LOC647954 |
|  | LOC648000 |

|  |           |
|--|-----------|
|  | LOC648024 |
|  | LOC648059 |
|  | LOC648099 |
|  | LOC648103 |
|  | LOC648176 |
|  | LOC648210 |
|  | LOC648249 |
|  | LOC648283 |
|  | LOC648294 |
|  | LOC648343 |
|  | LOC648370 |
|  | LOC648390 |
|  | LOC648399 |
|  | LOC648526 |
|  | LOC648581 |
|  | LOC648605 |
|  | LOC648622 |
|  | LOC648638 |
|  | LOC648659 |
|  | LOC648665 |
|  | LOC648682 |
|  | LOC648695 |
|  | LOC648705 |
|  | LOC648729 |
|  | LOC648740 |
|  | LOC648742 |
|  | LOC648744 |
|  | LOC648771 |
|  | LOC648822 |
|  | LOC648852 |
|  | LOC648907 |
|  | LOC648921 |
|  | LOC648927 |
|  | LOC648980 |
|  | LOC649009 |
|  | LOC649044 |
|  | LOC649049 |
|  | LOC649076 |
|  | LOC649143 |
|  | LOC649150 |
|  | LOC649169 |
|  | LOC649209 |
|  | LOC649214 |
|  | LOC649330 |
|  | LOC649365 |
|  | LOC649447 |
|  | LOC649548 |
|  | LOC649553 |
|  | LOC649555 |
|  | LOC649679 |
|  | LOC649821 |
|  | LOC649839 |
|  | LOC649864 |
|  | LOC649873 |
|  | LOC649946 |
|  | LOC649999 |



|  |           |
|--|-----------|
|  | LOC650020 |
|  | LOC650029 |
|  | LOC650111 |
|  | LOC650116 |
|  | LOC650152 |
|  | LOC650157 |
|  | LOC650215 |
|  | LOC650254 |
|  | LOC650276 |
|  | LOC650293 |
|  | LOC650298 |
|  | LOC650321 |
|  | LOC650369 |
|  | LOC650515 |
|  | LOC650518 |
|  | LOC650646 |
|  | LOC650698 |
|  | LOC650717 |
|  | LOC650737 |
|  | LOC650739 |
|  | LOC650757 |
|  | LOC650780 |
|  | LOC650803 |
|  | LOC650826 |
|  | LOC650832 |
|  | LOC650898 |
|  | LOC650909 |
|  | LOC651029 |
|  | LOC651064 |
|  | LOC651073 |
|  | LOC651137 |
|  | LOC651143 |
|  | LOC651149 |
|  | LOC651166 |
|  | LOC651198 |
|  | LOC651202 |
|  | LOC651296 |
|  | LOC651436 |
|  | LOC651453 |
|  | LOC651575 |
|  | LOC651576 |
|  | LOC651621 |
|  | LOC651680 |
|  | LOC651697 |
|  | LOC651816 |
|  | LOC651894 |
|  | LOC651919 |
|  | LOC652044 |
|  | LOC652071 |
|  | LOC652226 |
|  | LOC652281 |
|  | LOC652322 |
|  | LOC652388 |
|  | LOC652481 |
|  | LOC652489 |
|  | LOC652541 |

|  |           |
|--|-----------|
|  | LOC652545 |
|  | LOC652565 |
|  | LOC652595 |
|  | LOC652607 |
|  | LOC652608 |
|  | LOC652624 |
|  | LOC652627 |
|  | LOC652634 |
|  | LOC652669 |
|  | LOC652672 |
|  | LOC652685 |
|  | LOC652698 |
|  | LOC652726 |
|  | LOC652736 |
|  | LOC652741 |
|  | LOC652826 |
|  | LOC652864 |
|  | LOC652903 |
|  | LOC652968 |
|  | LOC652993 |
|  | LOC653034 |
|  | LOC653071 |
|  | LOC653079 |
|  | LOC653080 |
|  | LOC653086 |
|  | LOC653103 |
|  | LOC653108 |
|  | LOC653115 |
|  | LOC653147 |
|  | LOC653156 |
|  | LOC653162 |
|  | LOC653171 |
|  | LOC653226 |
|  | LOC653232 |
|  | LOC653242 |
|  | LOC653257 |
|  | LOC653308 |
|  | LOC653314 |
|  | LOC653324 |
|  | LOC653333 |
|  | LOC653344 |
|  | LOC653352 |
|  | LOC653375 |
|  | LOC653377 |
|  | LOC653381 |
|  | LOC653382 |
|  | LOC653383 |
|  | LOC653419 |
|  | LOC653421 |
|  | LOC653438 |
|  | LOC653450 |
|  | LOC653472 |
|  | LOC653479 |
|  | LOC653489 |
|  | LOC653496 |
|  | LOC653505 |

|  |           |
|--|-----------|
|  | LOC653506 |
|  | LOC653557 |
|  | LOC653566 |
|  | LOC653583 |
|  | LOC653590 |
|  | LOC653631 |
|  | LOC653635 |
|  | LOC653658 |
|  | LOC653702 |
|  | LOC653720 |
|  | LOC653737 |
|  | LOC653752 |
|  | LOC653773 |
|  | LOC653778 |
|  | LOC653820 |
|  | LOC653829 |
|  | LOC653874 |
|  | LOC653881 |
|  | LOC653884 |
|  | LOC653888 |
|  | LOC653972 |
|  | LOC653994 |
|  | LOC654000 |
|  | LOC654074 |
|  | LOC654085 |
|  | LOC654103 |
|  | LOC654121 |
|  | LOC654126 |
|  | LOC654135 |
|  | LOC654155 |
|  | LOC654161 |
|  | LOC654174 |
|  | LOC654189 |
|  | LOC654191 |
|  | LOC654194 |
|  | LOC654201 |
|  | LOC654244 |
|  | LOC654260 |
|  | LOC654342 |
|  | LOC654350 |
|  | LOC678655 |
|  | LOC723805 |
|  | LOC723972 |
|  | LOC727726 |
|  | LOC727732 |
|  | LOC727758 |
|  | LOC727761 |
|  | LOC727762 |
|  | LOC727773 |
|  | LOC727797 |
|  | LOC727803 |
|  | LOC727808 |
|  | LOC727818 |
|  | LOC727820 |
|  | LOC727821 |
|  | LOC727825 |

|  |           |
|--|-----------|
|  | LOC727826 |
|  | LOC727865 |
|  | LOC727866 |
|  | LOC727877 |
|  | LOC727899 |
|  | LOC727947 |
|  | LOC727950 |
|  | LOC727962 |
|  | LOC727963 |
|  | LOC727967 |
|  | LOC727970 |
|  | LOC727984 |
|  | LOC727987 |
|  | LOC728002 |
|  | LOC728006 |
|  | LOC728014 |
|  | LOC728026 |
|  | LOC728031 |
|  | LOC728037 |
|  | LOC728059 |
|  | LOC728060 |
|  | LOC728069 |
|  | LOC728086 |
|  | LOC728098 |
|  | LOC728105 |
|  | LOC728126 |
|  | LOC728127 |
|  | LOC728128 |
|  | LOC728138 |
|  | LOC728139 |
|  | LOC728142 |
|  | LOC728147 |
|  | LOC728153 |
|  | LOC728179 |
|  | LOC728181 |
|  | LOC728188 |
|  | LOC728207 |
|  | LOC728208 |
|  | LOC728216 |
|  | LOC728226 |
|  | LOC728229 |
|  | LOC728244 |
|  | LOC728262 |
|  | LOC728263 |
|  | LOC728310 |
|  | LOC728312 |
|  | LOC728324 |
|  | LOC728368 |
|  | LOC728408 |
|  | LOC728416 |
|  | LOC728428 |
|  | LOC728431 |
|  | LOC728440 |
|  | LOC728453 |
|  | LOC728457 |
|  | LOC728467 |

|  |           |
|--|-----------|
|  | LOC728473 |
|  | LOC728476 |
|  | LOC728481 |
|  | LOC728484 |
|  | LOC728485 |
|  | LOC728492 |
|  | LOC728499 |
|  | LOC728517 |
|  | LOC728532 |
|  | LOC728533 |
|  | LOC728537 |
|  | LOC728553 |
|  | LOC728554 |
|  | LOC728556 |
|  | LOC728564 |
|  | LOC728565 |
|  | LOC728572 |
|  | LOC728576 |
|  | LOC728590 |
|  | LOC728602 |
|  | LOC728620 |
|  | LOC728635 |
|  | LOC728640 |
|  | LOC728643 |
|  | LOC728650 |
|  | LOC728658 |
|  | LOC728661 |
|  | LOC728666 |
|  | LOC728672 |
|  | LOC728689 |
|  | LOC728693 |
|  | LOC728698 |
|  | LOC728728 |
|  | LOC728732 |
|  | LOC728734 |
|  | LOC728739 |
|  | LOC728741 |
|  | LOC728748 |
|  | LOC728755 |
|  | LOC728758 |
|  | LOC728772 |
|  | LOC728774 |
|  | LOC728779 |
|  | LOC728780 |
|  | LOC728782 |
|  | LOC728787 |
|  | LOC728791 |
|  | LOC728809 |
|  | LOC728811 |
|  | LOC728820 |
|  | LOC728823 |
|  | LOC728825 |
|  | LOC728831 |
|  | LOC728843 |
|  | LOC728844 |
|  | LOC728855 |

|  |           |
|--|-----------|
|  | LOC728873 |
|  | LOC728877 |
|  | LOC728888 |
|  | LOC728901 |
|  | LOC728903 |
|  | LOC728908 |
|  | LOC728919 |
|  | LOC728931 |
|  | LOC728937 |
|  | LOC728944 |
|  | LOC728953 |
|  | LOC728965 |
|  | LOC728969 |
|  | LOC728973 |
|  | LOC728975 |
|  | LOC728979 |
|  | LOC728992 |
|  | LOC729004 |
|  | LOC729009 |
|  | LOC729021 |
|  | LOC729081 |
|  | LOC729082 |
|  | LOC729086 |
|  | LOC729090 |
|  | LOC729101 |
|  | LOC729102 |
|  | LOC729120 |
|  | LOC729123 |
|  | LOC729142 |
|  | LOC729148 |
|  | LOC729200 |
|  | LOC729208 |
|  | LOC729217 |
|  | LOC729222 |
|  | LOC729236 |
|  | LOC729255 |
|  | LOC729259 |
|  | LOC729279 |
|  | LOC729298 |
|  | LOC729301 |
|  | LOC729313 |
|  | LOC729317 |
|  | LOC729324 |
|  | LOC729332 |
|  | LOC729340 |
|  | LOC729342 |
|  | LOC729348 |
|  | LOC729362 |
|  | LOC729366 |
|  | LOC729375 |
|  | LOC729397 |
|  | LOC729402 |
|  | LOC729404 |
|  | LOC729406 |
|  | LOC729417 |
|  | LOC729421 |

|  |           |
|--|-----------|
|  | LOC729423 |
|  | LOC729439 |
|  | LOC729446 |
|  | LOC729466 |
|  | LOC729484 |
|  | LOC729495 |
|  | LOC729500 |
|  | LOC729505 |
|  | LOC729510 |
|  | LOC729513 |
|  | LOC729519 |
|  | LOC729535 |
|  | LOC729559 |
|  | LOC729580 |
|  | LOC729587 |
|  | LOC729595 |
|  | LOC729603 |
|  | LOC729608 |
|  | LOC729617 |
|  | LOC729646 |
|  | LOC729660 |
|  | LOC729666 |
|  | LOC729677 |
|  | LOC729679 |
|  | LOC729680 |
|  | LOC729686 |
|  | LOC729687 |
|  | LOC729692 |
|  | LOC729708 |
|  | LOC729742 |
|  | LOC729760 |
|  | LOC729768 |
|  | LOC729769 |
|  | LOC729774 |
|  | LOC729776 |
|  | LOC729779 |
|  | LOC729780 |
|  | LOC729789 |
|  | LOC729798 |
|  | LOC729816 |
|  | LOC729841 |
|  | LOC729843 |
|  | LOC729852 |
|  | LOC729859 |
|  | LOC729887 |
|  | LOC729898 |
|  | LOC729903 |
|  | LOC729920 |
|  | LOC729926 |
|  | LOC729960 |
|  | LOC729964 |
|  | LOC729970 |
|  | LOC729978 |
|  | LOC729985 |
|  | LOC729992 |
|  | LOC730004 |

|  |           |
|--|-----------|
|  | LOC730005 |
|  | LOC730020 |
|  | LOC730029 |
|  | LOC730050 |
|  | LOC730052 |
|  | LOC730060 |
|  | LOC730074 |
|  | LOC730081 |
|  | LOC730098 |
|  | LOC730101 |
|  | LOC730107 |
|  | LOC730134 |
|  | LOC730167 |
|  | LOC730176 |
|  | LOC730187 |
|  | LOC730202 |
|  | LOC730226 |
|  | LOC730235 |
|  | LOC730236 |
|  | LOC730246 |
|  | LOC730254 |
|  | LOC730255 |
|  | LOC730256 |
|  | LOC730273 |
|  | LOC730278 |
|  | LOC730284 |
|  | LOC730288 |
|  | LOC730313 |
|  | LOC730316 |
|  | LOC730323 |
|  | LOC730324 |
|  | LOC730358 |
|  | LOC730382 |
|  | LOC730415 |
|  | LOC730417 |
|  | LOC730432 |
|  | LOC730455 |
|  | LOC730525 |
|  | LOC730534 |
|  | LOC730535 |
|  | LOC730704 |
|  | LOC730740 |
|  | LOC730744 |
|  | LOC730746 |
|  | LOC730754 |
|  | LOC730820 |
|  | LOC730841 |
|  | LOC730990 |
|  | LOC730993 |
|  | LOC731007 |
|  | LOC731049 |
|  | LOC731096 |
|  | LOC731196 |
|  | LOC731231 |
|  | LOC731308 |
|  | LOC731314 |



|  |           |
|--|-----------|
|  | LOC731365 |
|  | LOC731542 |
|  | LOC731640 |
|  | LOC731724 |
|  | LOC731777 |
|  | LOC731779 |
|  | LOC731789 |
|  | LOC731878 |
|  | LOC731950 |
|  | LOC731954 |
|  | LOC731985 |
|  | LOC731999 |
|  | LOC732007 |
|  | LOC732075 |
|  | LOC732165 |
|  | LOC732172 |
|  | LOC732360 |
|  | LOC732425 |
|  | LOC791120 |
|  | LOC88523  |
|  | LOC90342  |
|  | LOC90586  |
|  | LOC90624  |
|  | LOC91316  |
|  | LOC91561  |
|  | LOC91664  |
|  | LOC92249  |
|  | LOC92497  |
|  | LOC92755  |
|  | LOC92973  |
|  | LOC93622  |
|  | LOH12CR1  |
|  | LONP1     |
|  | LONP2     |
|  | LONRF1    |
|  | LOXL4     |
|  | LPAR3     |
|  | LPCAT1    |
|  | LPCAT3    |
|  | LPCAT4    |
|  | LPGAT1    |
|  | LPHN2     |
|  | LPIN1     |
|  | LPIN2     |
|  | LPP       |
|  | LPPR2     |
|  | LPXN      |
|  | LQK1      |
|  | LRAP      |
|  | LRBA      |
|  | LRCH3     |
|  | LRCH4     |
|  | LRDD      |
|  | LRFN3     |
|  | LRG1      |
|  | LRIG1     |

|  |          |
|--|----------|
|  | LRIG2    |
|  | LRP1     |
|  | LRP10    |
|  | LRP11    |
|  | LRP3     |
|  | LRP5     |
|  | LRP5L    |
|  | LRPAP1   |
|  | LRPPRC   |
|  | LRRC1    |
|  | LRRC14   |
|  | LRRC20   |
|  | LRRC28   |
|  | LRRC29   |
|  | LRRC3    |
|  | LRRC32   |
|  | LRRC37B  |
|  | LRRC37B2 |
|  | LRRC40   |
|  | LRRC41   |
|  | LRRC42   |
|  | LRRC45   |
|  | LRRC47   |
|  | LRRC56   |
|  | LRRC57   |
|  | LRRC58   |
|  | LRRC59   |
|  | LRRC61   |
|  | LRRC8A   |
|  | LRRC8D   |
|  | LRRC8E   |
|  | LRRCC1   |
|  | LRRFIP1  |
|  | LRRFIP2  |
|  | LRSAM1   |
|  | LRTOMT   |
|  | LRWD1    |
|  | LSG1     |
|  | LSM1     |
|  | LSM10    |
|  | LSM12    |
|  | LSM14A   |
|  | LSM2     |
|  | LSM3     |
|  | LSM4     |
|  | LSM5     |
|  | LSM6     |
|  | LSM7     |
|  | LSM8     |
|  | LSMD1    |
|  | LSP1     |
|  | LSR      |
|  | LSS      |
|  | LTA      |
|  | LTA4H    |
|  | LTB      |

|  |          |
|--|----------|
|  | LTBP3    |
|  | LTBP4    |
|  | LTBR     |
|  | LTF      |
|  | LTV1     |
|  | LUC7L    |
|  | LUC7L2   |
|  | LUZP1    |
|  | LY6E     |
|  | LY6H     |
|  | LYAR     |
|  | LYL1     |
|  | LYN      |
|  | LYPD3    |
|  | LYPLA1   |
|  | LYPLA2   |
|  | LYPLAL1  |
|  | LYRM1    |
|  | LYRM2    |
|  | LYRM4    |
|  | LYRM5    |
|  | LYRM7    |
|  | LYSMD2   |
|  | LYSMD3   |
|  | LYSMD4   |
|  | LZIC     |
|  | LZTFL1   |
|  | LZTR1    |
|  | LZTS2    |
|  | M6PR     |
|  | M6PRBP1  |
|  | MACF1    |
|  | MACROD1  |
|  | MAD1L1   |
|  | MAD2L1BP |
|  | MAD2L2   |
|  | MADD     |
|  | MAEA     |
|  | MAF      |
|  | MAF1     |
|  | MAFB     |
|  | MAFF     |
|  | MAFG     |
|  | MAGED1   |
|  | MAGED2   |
|  | MAGED4B  |
|  | MAGEE1   |
|  | MAGEF1   |
|  | MAGEH1   |
|  | MAGEL2   |
|  | Magmas   |
|  | MAGOH    |
|  | MAGT1    |
|  | MAK10    |
|  | MAK16    |
|  | MAL2     |

|  |           |
|--|-----------|
|  | MALT1     |
|  | MAMDC4    |
|  | MAML1     |
|  | MAN1A1    |
|  | MAN1A2    |
|  | MAN1B1    |
|  | MAN1C1    |
|  | MAN2A1    |
|  | MAN2A2    |
|  | MAN2B1    |
|  | MAN2B2    |
|  | MAN2C1    |
|  | MANBA     |
|  | MANBAL    |
|  | MANEA     |
|  | MANSC1    |
|  | MAOA      |
|  | MAP1LC3A  |
|  | MAP1LC3B  |
|  | MAP1S     |
|  | MAP2K1    |
|  | MAP2K1IP1 |
|  | MAP2K2    |
|  | MAP2K3    |
|  | MAP2K4    |
|  | MAP2K5    |
|  | MAP2K7    |
|  | MAP3K1    |
|  | MAP3K10   |
|  | MAP3K11   |
|  | MAP3K12   |
|  | MAP3K14   |
|  | MAP3K2    |
|  | MAP3K3    |
|  | MAP3K4    |
|  | MAP3K6    |
|  | MAP3K7    |
|  | MAP3K7IP1 |
|  | MAP3K7IP2 |
|  | MAP3K8    |
|  | MAP4      |
|  | MAP4K2    |
|  | MAP4K3    |
|  | MAP4K4    |
|  | MAP4K5    |
|  | MAP6D1    |
|  | MAP7      |
|  | MAP7D1    |
|  | MAPBPIP   |
|  | MAPK1     |
|  | MAPK13    |
|  | MAPK14    |
|  | MAPK3     |
|  | MAPK6     |
|  | MAPK7     |
|  | MAPK8IP3  |

|  |          |
|--|----------|
|  | MAPK9    |
|  | MAPKAP1  |
|  | MAPKAPK2 |
|  | MAPKAPK3 |
|  | MAPKAPK5 |
|  | MAPKSP1  |
|  | MAPRE1   |
|  | MAPRE2   |
|  | MAPRE3   |
|  | MARCH2   |
|  | MARCH3   |
|  | MARCH5   |
|  | MARCH6   |
|  | MARCH7   |
|  | MARCKS   |
|  | MARCKSL1 |
|  | MARK2    |
|  | MARK3    |
|  | MARS     |
|  | MARS2    |
|  | MARVELD2 |
|  | MARVELD3 |
|  | MASP1    |
|  | MAST2    |
|  | MAST3    |
|  | MASTL    |
|  | MAT2A    |
|  | MAT2B    |
|  | MATK     |
|  | MATN2    |
|  | MATR3    |
|  | MAX      |
|  | MBD1     |
|  | MBD2     |
|  | MBD3     |
|  | MBD4     |
|  | MBD6     |
|  | MBIP     |
|  | MBNL1    |
|  | MBNL2    |
|  | MBNL3    |
|  | MBOAT1   |
|  | MBOAT7   |
|  | MBP      |
|  | MBTD1    |
|  | MBTPS1   |
|  | MC1R     |
|  | MCART1   |
|  | MCAT     |
|  | MCCC1    |
|  | MCEE     |
|  | MCFD2    |
|  | MCHR2    |
|  | MCL1     |
|  | MCM3     |
|  | MCM3AP   |

|  |        |
|--|--------|
|  | MCM4   |
|  | MCM5   |
|  | MCM6   |
|  | MCM7   |
|  | MCM8   |
|  | MCOLN1 |
|  | MCPH1  |
|  | MCRS1  |
|  | MCTS1  |
|  | MDC1   |
|  | MDH1   |
|  | MDH2   |
|  | MDK    |
|  | MDM1   |
|  | MDM2   |
|  | MDN1   |
|  | MDP1   |
|  | ME1    |
|  | ME2    |
|  | ME3    |
|  | MEA1   |
|  | MEAF6  |
|  | MED1   |
|  | MED10  |
|  | MED11  |
|  | MED12  |
|  | MED13L |
|  | MED14  |
|  | MED15  |
|  | MED16  |
|  | MED17  |
|  | MED19  |
|  | MED20  |
|  | MED21  |
|  | MED22  |
|  | MED23  |
|  | MED24  |
|  | MED25  |
|  | MED26  |
|  | MED27  |
|  | MED28  |
|  | MED29  |
|  | MED30  |
|  | MED31  |
|  | MED4   |
|  | MED6   |
|  | MED7   |
|  | MED8   |
|  | MED9   |
|  | MEF2A  |
|  | MEF2D  |
|  | MEGF10 |
|  | MEGF8  |
|  | MEGF9  |
|  | MEIS1  |
|  | MEIS2  |

|  |           |
|--|-----------|
|  | MEIS3P1   |
|  | MEMO1     |
|  | MEN1      |
|  | MEPCE     |
|  | MERTK     |
|  | MEST      |
|  | MET       |
|  | METAP1    |
|  | METAP2    |
|  | METRN     |
|  | METRNL    |
|  | METT11D1  |
|  | METT5D1   |
|  | METTLL1   |
|  | METTLL10  |
|  | METTLL11A |
|  | METTLL13  |
|  | METTLL14  |
|  | METTLL2A  |
|  | METTLL3   |
|  | METTLL5   |
|  | METTLL6   |
|  | METTLL7A  |
|  | METTLL7B  |
|  | METTLL9   |
|  | MEX3A     |
|  | MEX3C     |
|  | MEX3D     |
|  | MFAP1     |
|  | MFAP2     |
|  | MFAP3     |
|  | MFAP3L    |
|  | MFF       |
|  | MFGE8     |
|  | MFHAS1    |
|  | MFN1      |
|  | MFN2      |
|  | MFSD1     |
|  | MFSD10    |
|  | MFSD11    |
|  | MFSD3     |
|  | MFSD5     |
|  | MFSD6     |
|  | MFSD8     |
|  | MGA       |
|  | MGAT1     |
|  | MGAT2     |
|  | MGAT4A    |
|  | MGAT4B    |
|  | MGC10997  |
|  | MGC12760  |
|  | MGC13057  |
|  | MGC15763  |
|  | MGC16169  |
|  | MGC16384  |
|  | MGC16703  |

|  |           |
|--|-----------|
|  | MGC18216  |
|  | MGC23284  |
|  | MGC26356  |
|  | MGC2752   |
|  | MGC29506  |
|  | MGC3020   |
|  | MGC3032   |
|  | MGC3196   |
|  | MGC33556  |
|  | MGC35361  |
|  | MGC3731   |
|  | MGC40489  |
|  | MGC4677   |
|  | MGC52000  |
|  | MGC57346  |
|  | MGC61598  |
|  | MGC70857  |
|  | MGC71993  |
|  | MGC72080  |
|  | MGC72104  |
|  | MGC87042  |
|  | MGC87895  |
|  | MGEA5     |
|  | MGLL      |
|  | MGMT      |
|  | MGP       |
|  | MGRN1     |
|  | MGST1     |
|  | MGST2     |
|  | MGST3     |
|  | MIA3      |
|  | MIB1      |
|  | MIB2      |
|  | MICAL1    |
|  | MICALL2   |
|  | MID1      |
|  | MID1IP1   |
|  | MID2      |
|  | MIDN      |
|  | MIER1     |
|  | MIER2     |
|  | MIF       |
|  | MIF4GD    |
|  | MIIP      |
|  | MINA      |
|  | MINPP1    |
|  | MIOS      |
|  | MIPEP     |
|  | MIR1185-1 |
|  | MIR1228   |
|  | MIR1253   |
|  | MIR125B2  |
|  | MIR129-2  |
|  | MIR130A   |
|  | MIR1974   |
|  | MIR1978   |



|  |         |
|--|---------|
|  | MIR2116 |
|  | MIR29B1 |
|  | MIR300  |
|  | MIR342  |
|  | MIR345  |
|  | MIR373  |
|  | MIR488  |
|  | MIR557  |
|  | MIR574  |
|  | MIR586  |
|  | MIR599  |
|  | MIR607  |
|  | MIR635  |
|  | MIR657  |
|  | MIR877  |
|  | MIS12   |
|  | MITD1   |
|  | MKI67IP |
|  | MKKS    |
|  | MKL1    |
|  | MKL2    |
|  | MKLN1   |
|  | MKNK1   |
|  | MKNK2   |
|  | MKRN1   |
|  | MKRN2   |
|  | MLEC    |
|  | MLF2    |
|  | MLH1    |
|  | MLL     |
|  | MLL3    |
|  | MLL4    |
|  | MLL5    |
|  | MLLT10  |
|  | MLLT11  |
|  | MLLT6   |
|  | MLPH    |
|  | MLST8   |
|  | MLX     |
|  | MLXIPL  |
|  | MLYCD   |
|  | MMAA    |
|  | MMAB    |
|  | MMACHC  |
|  | MMADHC  |
|  | MMD     |
|  | MME     |
|  | MMGT1   |
|  | MMP15   |
|  | MMP23A  |
|  | MMP23B  |
|  | MMS19   |
|  | MMS19L  |
|  | MN1     |
|  | MNAT1   |
|  | MNS1    |

|  |           |
|--|-----------|
|  | MNT       |
|  | MOAP1     |
|  | MOBK1B    |
|  | MOBKL1A   |
|  | MOBKL1B   |
|  | MOBKL2A   |
|  | MOBKL2C   |
|  | MOBKL3    |
|  | MOCOS     |
|  | MOCS1     |
|  | MOCS2     |
|  | MOGS      |
|  | MON1A     |
|  | MON1B     |
|  | MON2      |
|  | MORC2     |
|  | MORC3     |
|  | MORC4     |
|  | MORF4L1   |
|  | MORF4L2   |
|  | MORG1     |
|  | MORN2     |
|  | MOS       |
|  | MOSC1     |
|  | MOSC2     |
|  | MOSPD1    |
|  | MOSPD2    |
|  | MOSPD3    |
|  | MOV10     |
|  | MPDU1     |
|  | MPDZ      |
|  | MPG       |
|  | MPHOSPH10 |
|  | MPHOSPH6  |
|  | MPHOSPH8  |
|  | MPHOSPH9  |
|  | MPI       |
|  | MPND      |
|  | MPP1      |
|  | MPP5      |
|  | MPP6      |
|  | MPPE1     |
|  | MPRIP     |
|  | MPST      |
|  | MPV17     |
|  | MPV17L2   |
|  | MPZL1     |
|  | MPZL2     |
|  | MRFAP1    |
|  | MRFAP1L1  |
|  | MRI1      |
|  | MRLC2     |
|  | MRP63     |
|  | MRPL1     |
|  | MRPL10    |
|  | MRPL11    |

|  |         |
|--|---------|
|  | MRPL12  |
|  | MRPL13  |
|  | MRPL14  |
|  | MRPL15  |
|  | MRPL16  |
|  | MRPL17  |
|  | MRPL18  |
|  | MRPL19  |
|  | MRPL2   |
|  | MRPL20  |
|  | MRPL21  |
|  | MRPL22  |
|  | MRPL23  |
|  | MRPL24  |
|  | MRPL27  |
|  | MRPL28  |
|  | MRPL3   |
|  | MRPL30  |
|  | MRPL32  |
|  | MRPL33  |
|  | MRPL34  |
|  | MRPL35  |
|  | MRPL36  |
|  | MRPL37  |
|  | MRPL38  |
|  | MRPL39  |
|  | MRPL4   |
|  | MRPL40  |
|  | MRPL41  |
|  | MRPL42  |
|  | MRPL43  |
|  | MRPL44  |
|  | MRPL45  |
|  | MRPL46  |
|  | MRPL47  |
|  | MRPL48  |
|  | MRPL49  |
|  | MRPL50  |
|  | MRPL51  |
|  | MRPL52  |
|  | MRPL53  |
|  | MRPL54  |
|  | MRPL55  |
|  | MRPL9   |
|  | MRPS10  |
|  | MRPS11  |
|  | MRPS12  |
|  | MRPS14  |
|  | MRPS15  |
|  | MRPS16  |
|  | MRPS17  |
|  | MRPS18A |
|  | MRPS18B |
|  | MRPS18C |
|  | MRPS2   |
|  | MRPS21  |

|  |         |
|--|---------|
|  | MRPS22  |
|  | MRPS23  |
|  | MRPS24  |
|  | MRPS25  |
|  | MRPS26  |
|  | MRPS27  |
|  | MRPS28  |
|  | MRPS30  |
|  | MRPS31  |
|  | MRPS33  |
|  | MRPS34  |
|  | MRPS35  |
|  | MRPS36  |
|  | MRPS5   |
|  | MRPS6   |
|  | MRPS7   |
|  | MRPS9   |
|  | MRRF    |
|  | MRS2    |
|  | MRT04   |
|  | MSH3    |
|  | MSH6    |
|  | MSI1    |
|  | MSI2    |
|  | MSL1    |
|  | MSL2    |
|  | MSL3    |
|  | MSL3L1  |
|  | MSN     |
|  | MSRA    |
|  | MSRB2   |
|  | MST1    |
|  | MST4    |
|  | MSTO1   |
|  | MT1A    |
|  | MT1E    |
|  | MT1F    |
|  | MT1G    |
|  | MT1H    |
|  | MT1X    |
|  | MT2A    |
|  | MTA1    |
|  | MTA2    |
|  | MTA3    |
|  | MTAP    |
|  | MTCH1   |
|  | MTCH2   |
|  | MTCP1   |
|  | MTDH    |
|  | MTE     |
|  | MTERF   |
|  | MTERFD1 |
|  | MTF1    |
|  | MTF2    |
|  | MTFMT   |
|  | MTFR1   |

|  |         |
|--|---------|
|  | MTG1    |
|  | MTHFD1  |
|  | MTHFD1L |
|  | MTHFR   |
|  | MTHFS   |
|  | MTIF2   |
|  | MTIF3   |
|  | MTM1    |
|  | MTMR10  |
|  | MTMR11  |
|  | MTMR12  |
|  | MTMR14  |
|  | MTMR15  |
|  | MTMR2   |
|  | MTMR3   |
|  | MTMR4   |
|  | MTMR6   |
|  | MTMR9   |
|  | MTO1    |
|  | MTP18   |
|  | MTPN    |
|  | MTR     |
|  | MTRF1   |
|  | MTRF1L  |
|  | MTRR    |
|  | MTSS1   |
|  | MTSS1L  |
|  | MTTP    |
|  | MTUS1   |
|  | MTX1    |
|  | MTX2    |
|  | MTX3    |
|  | MUC1    |
|  | MUC6    |
|  | MUDENG  |
|  | MUL1    |
|  | MUM1    |
|  | MUS81   |
|  | MUSTN1  |
|  | MUT     |
|  | MUTED   |
|  | MUTYH   |
|  | MVD     |
|  | MVK     |
|  | MVP     |
|  | MX1     |
|  | MXD1    |
|  | MXD4    |
|  | MXI1    |
|  | MXRA7   |
|  | MYADM   |
|  | MYBBP1A |
|  | MYC     |
|  | MYCBP2  |
|  | MYD88   |
|  | MYH10   |

|  |         |
|--|---------|
|  | MYH9    |
|  | MYL12A  |
|  | MYL5    |
|  | MYL6    |
|  | MYL6B   |
|  | MYLIP   |
|  | MYLK    |
|  | MYNN    |
|  | MYO18A  |
|  | MYO1B   |
|  | MYO1C   |
|  | MYO1D   |
|  | MYO3B   |
|  | MYO5B   |
|  | MYO5C   |
|  | MYO6    |
|  | MYO7A   |
|  | MYO9B   |
|  | MYOM1   |
|  | MYOM2   |
|  | MYPOP   |
|  | MYST1   |
|  | MYST2   |
|  | MYST3   |
|  | MZF1    |
|  | N4BP1   |
|  | N4BP2   |
|  | N4BP2L1 |
|  | N4BP2L2 |
|  | N6AMT1  |
|  | N6AMT2  |
|  | NAAA    |
|  | NAB1    |
|  | NAB2    |
|  | NACA    |
|  | NACA2   |
|  | NACAP1  |
|  | NACC2   |
|  | NADK    |
|  | NADSYN1 |
|  | NAE1    |
|  | NAF1    |
|  | NAG18   |
|  | NAGA    |
|  | NAGK    |
|  | NAGLU   |
|  | NAGPA   |
|  | NAIF1   |
|  | NAMPT   |
|  | NANOS1  |
|  | NANP    |
|  | NANS    |
|  | NAP1L1  |
|  | NAP1L4  |
|  | NAP1L5  |
|  | NAPA    |

|  |         |
|--|---------|
|  | NAPB    |
|  | NAPEPLD |
|  | NAPG    |
|  | NAPRT1  |
|  | NARF    |
|  | NARFL   |
|  | NARG1   |
|  | NARG1L  |
|  | NARG2   |
|  | NARS    |
|  | NARS2   |
|  | NASP    |
|  | NAT1    |
|  | NAT10   |
|  | NAT12   |
|  | NAT13   |
|  | NAT14   |
|  | NAT15   |
|  | NAT5    |
|  | NAT6    |
|  | NAT8B   |
|  | NAT9    |
|  | NAV2    |
|  | NBAS    |
|  | NBEAL2  |
|  | NBL1    |
|  | NBN     |
|  | NBPF1   |
|  | NBPF10  |
|  | NBPF14  |
|  | NBPF20  |
|  | NBPF3   |
|  | NBPF8   |
|  | NCALD   |
|  | NCAN    |
|  | NCAPD2  |
|  | NCAPD3  |
|  | NCAPH2  |
|  | NCBP1   |
|  | NCBP2   |
|  | NCDN    |
|  | NCK1    |
|  | NCK2    |
|  | NCKAP1  |
|  | NCKIPSD |
|  | NCL     |
|  | NCLN    |
|  | NCOA1   |
|  | NCOA3   |
|  | NCOA4   |
|  | NCOA5   |
|  | NCOA6   |
|  | NCOA6IP |
|  | NCOA7   |
|  | NCOR1   |
|  | NCOR2   |

|  |            |
|--|------------|
|  | NCRNA00081 |
|  | NCRNA00087 |
|  | NCRNA00092 |
|  | NCRNA00094 |
|  | NCRNA00095 |
|  | NCRNA00152 |
|  | NCRNA00200 |
|  | NCRNA00219 |
|  | NCSTN      |
|  | NDC80      |
|  | NDE1       |
|  | NDEL1      |
|  | NDFIP1     |
|  | NDFIP2     |
|  | NDN        |
|  | NDNL2      |
|  | NDRG1      |
|  | NDRG2      |
|  | NDRG3      |
|  | NDRG4      |
|  | NDST1      |
|  | NDST2      |
|  | NDUFA1     |
|  | NDUFA10    |
|  | NDUFA11    |
|  | NDUFA12    |
|  | NDUFA13    |
|  | NDUFA2     |
|  | NDUFA3     |
|  | NDUFA4     |
|  | NDUFA5     |
|  | NDUFA6     |
|  | NDUFA7     |
|  | NDUFA8     |
|  | NDUFA9     |
|  | NDUFAB1    |
|  | NDUFAF1    |
|  | NDUFAF2    |
|  | NDUFAF3    |
|  | NDUFB10    |
|  | NDUFB11    |
|  | NDUFB2     |
|  | NDUFB3     |
|  | NDUFB5     |
|  | NDUFB6     |
|  | NDUFB7     |
|  | NDUFB8     |
|  | NDUFB9     |
|  | NDUFC1     |
|  | NDUFS2     |
|  | NDUFS3     |
|  | NDUFS4     |
|  | NDUFS5     |
|  | NDUFS7     |
|  | NDUFS8     |
|  | NDUFV1     |



|  |          |
|--|----------|
|  | NDUFV2   |
|  | NDUFV3   |
|  | NECAB3   |
|  | NECAP1   |
|  | NECAP2   |
|  | NEDD4    |
|  | NEDD4L   |
|  | NEDD8    |
|  | NEDD9    |
|  | NEIL2    |
|  | NEK1     |
|  | NEK2     |
|  | NEK3     |
|  | NEK6     |
|  | NEK8     |
|  | NELF     |
|  | NENF     |
|  | NEO1     |
|  | NET1     |
|  | NEU1     |
|  | NEU4     |
|  | NEURL1B  |
|  | NEURL2   |
|  | NEUROG2  |
|  | NFAT5    |
|  | NFATC1   |
|  | NFATC2IP |
|  | NFATC3   |
|  | NFE2L1   |
|  | NFE2L2   |
|  | NFE2L3   |
|  | NFIB     |
|  | NFIL3    |
|  | NFKB1    |
|  | NFKB2    |
|  | NFKBIA   |
|  | NFKBIB   |
|  | NFKBIE   |
|  | NFKBIZ   |
|  | NFRKB    |
|  | NFU1     |
|  | NFX1     |
|  | NFXL1    |
|  | NFYA     |
|  | NFYB     |
|  | NFYC     |
|  | NGDN     |
|  | NGEF     |
|  | NGFRAP1  |
|  | NGLY1    |
|  | NGRN     |
|  | NHEDC2   |
|  | NHLRC2   |
|  | NHLRC3   |
|  | NHP2     |
|  | NHP2L1   |

|  |           |
|--|-----------|
|  | NICN1     |
|  | NIF3L1    |
|  | NIN       |
|  | NINJ1     |
|  | NINL      |
|  | NIP30     |
|  | NIP7      |
|  | NIPA1     |
|  | NIPA2     |
|  | NIPAL1    |
|  | NIPBL     |
|  | NIPSNAP1  |
|  | NIPSNAP3A |
|  | NISCH     |
|  | NIT1      |
|  | NIT2      |
|  | NKAP      |
|  | NKD2      |
|  | NKIRAS1   |
|  | NKIRAS2   |
|  | NKRF      |
|  | NKTR      |
|  | NKX3-1    |
|  | NLE1      |
|  | NLGN2     |
|  | NLN       |
|  | NLRP3     |
|  | NLRP8     |
|  | NLRX1     |
|  | NMB       |
|  | NMD3      |
|  | NME1      |
|  | NME1-NME2 |
|  | NME2      |
|  | NME3      |
|  | NME4      |
|  | NME6      |
|  | NME7      |
|  | NMI       |
|  | NMNAT1    |
|  | NMRAL1    |
|  | NMT1      |
|  | NMT2      |
|  | NNT       |
|  | NOB1      |
|  | NOC2L     |
|  | NOC3L     |
|  | NOC4L     |
|  | NODAL     |
|  | NOL10     |
|  | NOL11     |
|  | NOL12     |
|  | NOL6      |
|  | NOL7      |
|  | NOL8      |
|  | NOLA1     |

|  |          |
|--|----------|
|  | NOLC1    |
|  | NOMO1    |
|  | NOMO2    |
|  | NONO     |
|  | NOP10    |
|  | NOP14    |
|  | NOP16    |
|  | NOP2     |
|  | NOP56    |
|  | NOP58    |
|  | NOSIP    |
|  | NOTCH1   |
|  | NOTCH2   |
|  | NOTCH2NL |
|  | NOXA1    |
|  | NOXO1    |
|  | NP       |
|  | N-PAC    |
|  | NPAL3    |
|  | NPB      |
|  | NPC1     |
|  | NPC2     |
|  | NPEPL1   |
|  | NPEPPS   |
|  | NPHP3    |
|  | NPIP     |
|  | NPLOC4   |
|  | NPM3     |
|  | NPR2     |
|  | NPTN     |
|  | NPW      |
|  | NPY5R    |
|  | NQO1     |
|  | NQO2     |
|  | NR1D2    |
|  | NR1H2    |
|  | NR1H3    |
|  | NR2C1    |
|  | NR2C2AP  |
|  | NR2F2    |
|  | NR2F6    |
|  | NR3C1    |
|  | NR3C2    |
|  | NR5A2    |
|  | NRAS     |
|  | NRBF2    |
|  | NRBP1    |
|  | NRBP2    |
|  | NRD1     |
|  | NRIP1    |
|  | NRIP3    |
|  | NRK      |
|  | NRM      |
|  | NRP1     |
|  | NRSN2    |
|  | NSA2     |

|  |          |
|--|----------|
|  | NSBP1    |
|  | NSD1     |
|  | NSDHL    |
|  | NSF      |
|  | NSFL1C   |
|  | NSL1     |
|  | NSMAF    |
|  | NSMCE1   |
|  | NSMCE2   |
|  | NSMCE4A  |
|  | NSUN2    |
|  | NSUN3    |
|  | NSUN4    |
|  | NSUN5    |
|  | NSUN5B   |
|  | NSUN5C   |
|  | NSUN6    |
|  | NT5C     |
|  | NT5C2    |
|  | NT5C3    |
|  | NT5C3L   |
|  | NT5DC1   |
|  | NT5DC3   |
|  | NTAN1    |
|  | NTF3     |
|  | NTHL1    |
|  | NUAK1    |
|  | NUAK2    |
|  | NUB1     |
|  | NUBP1    |
|  | NUBP2    |
|  | NUBPL    |
|  | NUCB1    |
|  | NUCB2    |
|  | NUCKS1   |
|  | NUDC     |
|  | NUDCD2   |
|  | NUDCD3   |
|  | NUDT1    |
|  | NUDT14   |
|  | NUDT15   |
|  | NUDT16   |
|  | NUDT16L1 |
|  | NUDT18   |
|  | NUDT2    |
|  | NUDT21   |
|  | NUDT22   |
|  | NUDT3    |
|  | NUDT5    |
|  | NUDT6    |
|  | NUDT7    |
|  | NUDT8    |
|  | NUDT9    |
|  | NUFIP1   |
|  | NUFIP2   |
|  | NUMA1    |

|  |          |
|--|----------|
|  | NUMB     |
|  | NUP107   |
|  | NUP133   |
|  | NUP153   |
|  | NUP155   |
|  | NUP160   |
|  | NUP188   |
|  | NUP205   |
|  | NUP214   |
|  | NUP35    |
|  | NUP37    |
|  | NUP43    |
|  | NUP50    |
|  | NUP54    |
|  | NUP62    |
|  | NUP85    |
|  | NUP88    |
|  | NUP93    |
|  | NUP98    |
|  | NUPL2    |
|  | NUPR1    |
|  | NUS1     |
|  | NUSAP1   |
|  | NUTF2    |
|  | NVL      |
|  | NXF1     |
|  | NXN      |
|  | NXT1     |
|  | NXT2     |
|  | NY-REN-7 |
|  | OAF      |
|  | OAS1     |
|  | OAS2     |
|  | OAS3     |
|  | OAT      |
|  | OAZ1     |
|  | OAZ2     |
|  | OBFC1    |
|  | OBFC2A   |
|  | OBFC2B   |
|  | OCEL1    |
|  | OCIAD1   |
|  | OCIAD2   |
|  | OCRL     |
|  | ODC1     |
|  | ODF2     |
|  | ODF3B    |
|  | OFD1     |
|  | OGDH     |
|  | OGDHL    |
|  | OGFOD1   |
|  | OGFR     |
|  | OGFRL1   |
|  | OGG1     |
|  | OGT      |
|  | OKL38    |

|  |          |
|--|----------|
|  | OMA1     |
|  | OPA1     |
|  | OPA3     |
|  | OPLAH    |
|  | OPN3     |
|  | OPRL1    |
|  | OPTN     |
|  | OR11H1   |
|  | OR2A20P  |
|  | OR2A42   |
|  | OR2A9P   |
|  | OR2B2    |
|  | OR56B1   |
|  | OR7E156P |
|  | OR9A4    |
|  | ORAI1    |
|  | ORAI3    |
|  | ORAOV1   |
|  | ORC1L    |
|  | ORC2L    |
|  | ORC3L    |
|  | ORC5L    |
|  | ORC6L    |
|  | ORMDL1   |
|  | ORMDL2   |
|  | ORMDL3   |
|  | OS9      |
|  | OSBP     |
|  | OSBPL11  |
|  | OSBPL1A  |
|  | OSBPL2   |
|  | OSBPL6   |
|  | OSBPL7   |
|  | OSBPL8   |
|  | OSBPL9   |
|  | OSCP1    |
|  | OSGEP    |
|  | OSGEPL1  |
|  | OSGIN2   |
|  | OSR1     |
|  | OSTalpha |
|  | OSTC     |
|  | OSTCL    |
|  | OSTF1    |
|  | OSTM1    |
|  | OTUB1    |
|  | OTUD1    |
|  | OTUD4    |
|  | OTUD5    |
|  | OTUD6B   |
|  | OVGP1    |
|  | OXA1L    |
|  | OXR1     |
|  | OXSM     |
|  | OXSRL    |
|  | OXR1     |

|  |          |
|--|----------|
|  | P15RS    |
|  | P2RX4    |
|  | P2RY11   |
|  | P4HA1    |
|  | P4HA2    |
|  | P4HB     |
|  | P4HTM    |
|  | P704P    |
|  | P76      |
|  | P8       |
|  | PA2G4    |
|  | PAAF1    |
|  | PABPC1   |
|  | PABPC1L  |
|  | PABPC3   |
|  | PABPC4   |
|  | PABPC5   |
|  | PABPN1   |
|  | PACS1    |
|  | PACS2    |
|  | PACSIN2  |
|  | PACSIN3  |
|  | PAF1     |
|  | PAFAH1B1 |
|  | PAFAH1B2 |
|  | PAFAH1B3 |
|  | PAFAH2   |
|  | PAG1     |
|  | PAGE4    |
|  | PAH      |
|  | PAICS    |
|  | PAIP1    |
|  | PAIP2    |
|  | PAK1     |
|  | PAK1IP1  |
|  | PAK2     |
|  | PAK4     |
|  | PALB2    |
|  | PALLD    |
|  | PALM     |
|  | PALMD    |
|  | PAM      |
|  | PAN2     |
|  | PAN3     |
|  | PANK1    |
|  | PANK2    |
|  | PANK3    |
|  | PANK4    |
|  | PANX1    |
|  | PANX2    |
|  | PAOX     |
|  | PAPD1    |
|  | PAPD4    |
|  | PAPD5    |
|  | PAPLN    |
|  | PAPOLA   |

|  |          |
|--|----------|
|  | PAPSS1   |
|  | PAPSS2   |
|  | PAQR3    |
|  | PAQR4    |
|  | PAQR7    |
|  | PARD6G   |
|  | PARK7    |
|  | PARL     |
|  | PARN     |
|  | PARP1    |
|  | PARP10   |
|  | PARP11   |
|  | PARP12   |
|  | PARP14   |
|  | PARP16   |
|  | PARP2    |
|  | PARP3    |
|  | PARP4    |
|  | PARP6    |
|  | PARP8    |
|  | PARP9    |
|  | PARS2    |
|  | PARVA    |
|  | PARVB    |
|  | PASK     |
|  | PATE2    |
|  | PATE3    |
|  | PATL1    |
|  | PAWR     |
|  | PAXIP1   |
|  | PBLD     |
|  | PBRM1    |
|  | PBX2     |
|  | PBX3     |
|  | PC       |
|  | PCBD1    |
|  | PCBP1    |
|  | PCBP2    |
|  | PCBP4    |
|  | PCCA     |
|  | PCCB     |
|  | PCDHB19P |
|  | PCDHB9   |
|  | PCDHGB6  |
|  | PCF11    |
|  | PCGF1    |
|  | PCGF2    |
|  | PCGF6    |
|  | PCID2    |
|  | PCIF1    |
|  | PCK2     |
|  | PCM1     |
|  | PCMT1    |
|  | PCMTD1   |
|  | PCMTD2   |
|  | PCNA     |



|  |         |
|--|---------|
|  | PCNP    |
|  | PCNT    |
|  | PCNX    |
|  | PCNXL3  |
|  | PCOLCE  |
|  | PCOLCE2 |
|  | PCSK1N  |
|  | PCSK4   |
|  | PCSK5   |
|  | PCSK6   |
|  | PCSK7   |
|  | PCTK2   |
|  | PCTK3   |
|  | PCTP    |
|  | PCYOX1  |
|  | PCYT2   |
|  | PDCD10  |
|  | PDCD11  |
|  | PDCD2   |
|  | PDCD2L  |
|  | PDCD4   |
|  | PDCD5   |
|  | PDCD6   |
|  | PDCD6IP |
|  | PDCD7   |
|  | PDCL    |
|  | PDCL3   |
|  | PDDC1   |
|  | PDE4A   |
|  | PDE4C   |
|  | PDE6D   |
|  | PDE7A   |
|  | PDE8A   |
|  | PDE9A   |
|  | PDGFC   |
|  | PDGFRB  |
|  | PDGFRL  |
|  | PDHA1   |
|  | PDHB    |
|  | PDHX    |
|  | PDIA3P  |
|  | PDIA4   |
|  | PDIA5   |
|  | PDIA6   |
|  | PDIK1L  |
|  | PDK2    |
|  | PDK3    |
|  | PDK4    |
|  | PDLIM1  |
|  | PDLIM3  |
|  | PDLIM5  |
|  | PDLIM7  |
|  | PDP2    |
|  | PDPK1   |
|  | PDPR    |
|  | PDRG1   |

|  |         |
|--|---------|
|  | PDS5A   |
|  | PDS5B   |
|  | PDSS1   |
|  | PDSS2   |
|  | PDXDC1  |
|  | PDXK    |
|  | PDXP    |
|  | PDZD8   |
|  | PDZK1   |
|  | PDZK1P1 |
|  | PEA15   |
|  | PEBP1   |
|  | PECI    |
|  | PECR    |
|  | PEF1    |
|  | PELI1   |
|  | PELO    |
|  | PELP1   |
|  | PEMT    |
|  | PEPD    |
|  | PER2    |
|  | PER3    |
|  | PERP    |
|  | PES1    |
|  | PET112L |
|  | PEX1    |
|  | PEX10   |
|  | PEX11A  |
|  | PEX11B  |
|  | PEX11G  |
|  | PEX13   |
|  | PEX14   |
|  | PEX16   |
|  | PEX19   |
|  | PEX5    |
|  | PEX6    |
|  | PEX7    |
|  | PFAAP5  |
|  | PFAS    |
|  | PFDN1   |
|  | PFDN2   |
|  | PFDN4   |
|  | PFDN5   |
|  | PFDN6   |
|  | PFKFB3  |
|  | PFKFB4  |
|  | PFKL    |
|  | PFKM    |
|  | PFKP    |
|  | PFN1    |
|  | PFN2    |
|  | PFTK1   |
|  | PGAM1   |
|  | PGAM4   |
|  | PGAM5   |
|  | PGAP3   |

|  |          |
|--|----------|
|  | PGBD3    |
|  | PGCP     |
|  | PGD      |
|  | PGK1     |
|  | PGLS     |
|  | PGM1     |
|  | PGM2     |
|  | PGM3     |
|  | PGP      |
|  | PGPEP1   |
|  | PGRMC1   |
|  | PGRMC2   |
|  | PGS1     |
|  | PHACTR2  |
|  | PHACTR4  |
|  | PHAX     |
|  | PHB      |
|  | PHB2     |
|  | PHC1     |
|  | PHC2     |
|  | PHCA     |
|  | PHF1     |
|  | PHF10    |
|  | PHF11    |
|  | PHF12    |
|  | PHF13    |
|  | PHF14    |
|  | PHF15    |
|  | PHF16    |
|  | PHF17    |
|  | PHF19    |
|  | PHF2     |
|  | PHF20    |
|  | PHF20L1  |
|  | PHF21A   |
|  | PHF23    |
|  | PHF3     |
|  | PHF5A    |
|  | PHF7     |
|  | PHGDH    |
|  | PHIP     |
|  | PHKA1    |
|  | PHKA2    |
|  | PHKB     |
|  | PHKG2    |
|  | PHLDA1   |
|  | PHLDB1   |
|  | PHLDB2   |
|  | PHLPP1   |
|  | PHLPP2   |
|  | PHOSPHO2 |
|  | PHPT1    |
|  | PHRF1    |
|  | PHTF1    |
|  | PHYH     |
|  | PHYHD1   |

|  |         |
|--|---------|
|  | PI4K2A  |
|  | PI4K2B  |
|  | PI4KAP1 |
|  | PI4KAP2 |
|  | PI4KB   |
|  | PIAS1   |
|  | PIAS2   |
|  | PIAS4   |
|  | PIBF1   |
|  | PICALM  |
|  | PICK1   |
|  | PID1    |
|  | PIF1    |
|  | PIGA    |
|  | PIGC    |
|  | PIGF    |
|  | PIGG    |
|  | PIGH    |
|  | PIGK    |
|  | PIGL    |
|  | PIGM    |
|  | PIGN    |
|  | PIGO    |
|  | PIGP    |
|  | PIGQ    |
|  | PIGS    |
|  | PIGT    |
|  | PIGU    |
|  | PIGV    |
|  | PIGW    |
|  | PIGX    |
|  | PIGY    |
|  | PIGZ    |
|  | PIH1D1  |
|  | PIK3C2A |
|  | PIK3C2B |
|  | PIK3C3  |
|  | PIK3CA  |
|  | PIK3CB  |
|  | PIK3CD  |
|  | PIK3IP1 |
|  | PIK3R1  |
|  | PIK3R2  |
|  | PIK3R4  |
|  | PIK4CA  |
|  | PILRA   |
|  | PILRB   |
|  | PIM1    |
|  | PIM2    |
|  | PIM3    |
|  | PIN1    |
|  | PIN4    |
|  | PINK1   |
|  | PINX1   |
|  | PIP3-E  |
|  | PIP4K2A |

|  |          |
|--|----------|
|  | PIP4K2C  |
|  | PIP5K1C  |
|  | PIP5K2B  |
|  | PIPSL    |
|  | PIR      |
|  | PISD     |
|  | PITPNA   |
|  | PITPNB   |
|  | PITPNC1  |
|  | PITPNM1  |
|  | PITRM1   |
|  | PJA1     |
|  | PJA2     |
|  | PKD1     |
|  | PKD2     |
|  | PKDCC    |
|  | PKIG     |
|  | PKM2     |
|  | PKN1     |
|  | PKN2     |
|  | PKNOX1   |
|  | PKP2     |
|  | PKP4     |
|  | PLA2G12B |
|  | PLA2G15  |
|  | PLA2G16  |
|  | PLA2G2C  |
|  | PLA2G2D  |
|  | PLA2G4B  |
|  | PLA2G6   |
|  | PLAA     |
|  | PLAG1    |
|  | PLAGL2   |
|  | PLAU     |
|  | PLCB1    |
|  | PLCD1    |
|  | PLCG1    |
|  | PLCG2    |
|  | PLCL2    |
|  | PLCXD1   |
|  | PLD1     |
|  | PLD2     |
|  | PLD3     |
|  | PLD6     |
|  | PLDN     |
|  | PLEC1    |
|  | PLEK2    |
|  | PLEKHA1  |
|  | PLEKHA2  |
|  | PLEKHA4  |
|  | PLEKHA5  |
|  | PLEKHA6  |
|  | PLEKHA7  |
|  | PLEKHA9  |
|  | PLEKHB2  |
|  | PLEKHF1  |

|  |         |
|--|---------|
|  | PLEKHF2 |
|  | PLEKHG3 |
|  | PLEKHG6 |
|  | PLEKHH3 |
|  | PLEKHJ1 |
|  | PLEKHM1 |
|  | PLEKHM2 |
|  | PLEKHN1 |
|  | PLEKHO1 |
|  | PLEKHO2 |
|  | PLIN2   |
|  | PLIN5   |
|  | PLK2    |
|  | PLLP    |
|  | PLOD1   |
|  | PLOD2   |
|  | PLOD3   |
|  | PLP1    |
|  | PLP2    |
|  | PLRG1   |
|  | PLS1    |
|  | PLS3    |
|  | PLSCR3  |
|  | PLSCR4  |
|  | PLTP    |
|  | PLXNA1  |
|  | PLXNA3  |
|  | PLXNA4  |
|  | PLXNB1  |
|  | PLXNB2  |
|  | PLXND1  |
|  | PM20D2  |
|  | PMEPA1  |
|  | PMF1    |
|  | PMM1    |
|  | PMM2    |
|  | PMP22   |
|  | PMPCA   |
|  | PMPCB   |
|  | PMS2    |
|  | PMS2CL  |
|  | PMS2L3  |
|  | PMS2L4  |
|  | PMS2L5  |
|  | PMVK    |
|  | PNKD    |
|  | PNKP    |
|  | PNMA1   |
|  | PNN     |
|  | PNO1    |
|  | PNPLA2  |
|  | PNPLA4  |
|  | PNPLA6  |
|  | PNPLA7  |
|  | PNPLA8  |
|  | PNPO    |

|  |         |
|--|---------|
|  | PNPT1   |
|  | PNRC2   |
|  | PODN    |
|  | PODXL   |
|  | POFUT1  |
|  | POFUT2  |
|  | POGK    |
|  | POL3S   |
|  | POLA1   |
|  | POLA2   |
|  | POLB    |
|  | POLD1   |
|  | POLD2   |
|  | POLD3   |
|  | POLD4   |
|  | POLDIP2 |
|  | POLDIP3 |
|  | POLE    |
|  | POLE2   |
|  | POLE3   |
|  | POLE4   |
|  | POLG    |
|  | POLG2   |
|  | POLM    |
|  | POLN    |
|  | POLR1B  |
|  | POLR1C  |
|  | POLR1D  |
|  | POLR1E  |
|  | POLR2A  |
|  | POLR2B  |
|  | POLR2C  |
|  | POLR2D  |
|  | POLR2E  |
|  | POLR2F  |
|  | POLR2G  |
|  | POLR2H  |
|  | POLR2I  |
|  | POLR2J  |
|  | POLR2J2 |
|  | POLR2J3 |
|  | POLR2J4 |
|  | POLR2K  |
|  | POLR2L  |
|  | POLR3A  |
|  | POLR3B  |
|  | POLR3C  |
|  | POLR3E  |
|  | POLR3F  |
|  | POLR3G  |
|  | POLR3GL |
|  | POLR3H  |
|  | POLR3K  |
|  | POLRMT  |
|  | POLS    |
|  | POM121C |

|  |          |
|--|----------|
|  | POMGNT1  |
|  | POMP     |
|  | POMT1    |
|  | POMT2    |
|  | PON2     |
|  | POP1     |
|  | POP4     |
|  | POP5     |
|  | POP7     |
|  | POR      |
|  | POTEF    |
|  | PP14571  |
|  | PPA1     |
|  | PPA2     |
|  | PPAN     |
|  | PPAP2A   |
|  | PPAP2B   |
|  | PPAP2C   |
|  | PPAPDC1B |
|  | PPAPDC2  |
|  | PPARA    |
|  | PPARBP   |
|  | PPARD    |
|  | PPARG    |
|  | PPARGC1A |
|  | PPAT     |
|  | PPBP     |
|  | PPCS     |
|  | PPDPF    |
|  | PPFIA1   |
|  | PPFIBP1  |
|  | PPFIBP2  |
|  | PPHLN1   |
|  | PPIA     |
|  | PPIAL4A  |
|  | PPIB     |
|  | PPIC     |
|  | PPIE     |
|  | PPIG     |
|  | PPIH     |
|  | PPIL1    |
|  | PPIL3    |
|  | PPIL5    |
|  | PPL      |
|  | PPM1A    |
|  | PPM1B    |
|  | PPM1D    |
|  | PPM1F    |
|  | PPM1G    |
|  | PPM1H    |
|  | PPM1K    |
|  | PPM1M    |
|  | PPM2C    |
|  | PPME1    |
|  | PPOX     |
|  | PPP1CA   |



|  |          |
|--|----------|
|  | PPP1CB   |
|  | PPP1CC   |
|  | PPP1R10  |
|  | PPP1R11  |
|  | PPP1R12A |
|  | PPP1R12B |
|  | PPP1R12C |
|  | PPP1R13B |
|  | PPP1R13L |
|  | PPP1R14B |
|  | PPP1R15A |
|  | PPP1R15B |
|  | PPP1R16A |
|  | PPP1R1A  |
|  | PPP1R1C  |
|  | PPP1R2   |
|  | PPP1R3C  |
|  | PPP1R3E  |
|  | PPP1R7   |
|  | PPP1R8   |
|  | PPP2CA   |
|  | PPP2CB   |
|  | PPP2R1A  |
|  | PPP2R1B  |
|  | PPP2R2A  |
|  | PPP2R2B  |
|  | PPP2R2D  |
|  | PPP2R3A  |
|  | PPP2R3C  |
|  | PPP2R4   |
|  | PPP2R5A  |
|  | PPP2R5B  |
|  | PPP2R5C  |
|  | PPP2R5D  |
|  | PPP2R5E  |
|  | PPP3CA   |
|  | PPP3CB   |
|  | PPP3CC   |
|  | PPP3R1   |
|  | PPP4C    |
|  | PPP4R1   |
|  | PPP4R4   |
|  | PPP6C    |
|  | PPPDE1   |
|  | PPPDE2   |
|  | PPRC1    |
|  | PPT1     |
|  | PPT2     |
|  | PPTC7    |
|  | PPWD1    |
|  | PQBP1    |
|  | PQLC1    |
|  | PQLC3    |
|  | PRAF2    |
|  | PRAGMIN  |
|  | PRAMEF13 |

|  |          |
|--|----------|
|  | PRAMEF7  |
|  | PRC1     |
|  | PRCC     |
|  | PRCP     |
|  | PRDM10   |
|  | PRDM4    |
|  | PRDX1    |
|  | PRDX2    |
|  | PRDX3    |
|  | PRDX4    |
|  | PRDX5    |
|  | PRDX6    |
|  | PREB     |
|  | PREI3    |
|  | PRELID1  |
|  | PREP     |
|  | PREPL    |
|  | PRIC285  |
|  | PRICKLE2 |
|  | PRICKLE4 |
|  | PRIM1    |
|  | PRIM2A   |
|  | PRKAA1   |
|  | PRKAB1   |
|  | PRKAB2   |
|  | PRKAG1   |
|  | PRKAG2   |
|  | PRKAR1A  |
|  | PRKAR2A  |
|  | PRKCA    |
|  | PRKCABP  |
|  | PRKCD    |
|  | PRKCDBP  |
|  | PRKCH    |
|  | PRKCI    |
|  | PRKCSH   |
|  | PRKCZ    |
|  | PRKD1    |
|  | PRKD2    |
|  | PRKD3    |
|  | PRKDC    |
|  | PRKRA    |
|  | PRKRIP1  |
|  | PRKRIR   |
|  | PRLR     |
|  | PRMT1    |
|  | PRMT10   |
|  | PRMT2    |
|  | PRMT3    |
|  | PRMT5    |
|  | PRMT6    |
|  | PRMT7    |
|  | PRNP     |
|  | PRNPIP   |
|  | PRO0628  |
|  | PRO1853  |

|  |           |
|--|-----------|
|  | PROCR     |
|  | PROS1     |
|  | ProSAPiP1 |
|  | PROSC     |
|  | PROX1     |
|  | PRPF18    |
|  | PRPF19    |
|  | PRPF3     |
|  | PRPF31    |
|  | PRPF38A   |
|  | PRPF38B   |
|  | PRPF4     |
|  | PRPF40A   |
|  | PRPF4B    |
|  | PRPF6     |
|  | PRPF8     |
|  | PRPS1     |
|  | PRPS2     |
|  | PRPSAP1   |
|  | PRPSAP2   |
|  | PRR13     |
|  | PRR14     |
|  | PRR15L    |
|  | PRR19     |
|  | PRR3      |
|  | PRR5      |
|  | PRRC1     |
|  | PRRG1     |
|  | PRRG2     |
|  | PRRG4     |
|  | PRRT3     |
|  | PRSS23    |
|  | PRSS7     |
|  | PRSS8     |
|  | PRUNE     |
|  | PSAP      |
|  | PSAT1     |
|  | PSCD1     |
|  | PSCD2     |
|  | PSD3      |
|  | PSD4      |
|  | PSEN1     |
|  | PSEN2     |
|  | PSENEEN   |
|  | PSG3      |
|  | PSG4      |
|  | PSIP1     |
|  | PSKH1     |
|  | PSMA1     |
|  | PSMA2     |
|  | PSMA3     |
|  | PSMA4     |
|  | PSMA5     |
|  | PSMA6     |
|  | PSMB1     |
|  | PSMB10    |

|  |         |
|--|---------|
|  | PSMB2   |
|  | PSMB3   |
|  | PSMB4   |
|  | PSMB5   |
|  | PSMB6   |
|  | PSMB7   |
|  | PSMB8   |
|  | PSMC1   |
|  | PSMC2   |
|  | PSMC3   |
|  | PSMC3IP |
|  | PSMC4   |
|  | PSMC5   |
|  | PSMC6   |
|  | PSMD1   |
|  | PSMD10  |
|  | PSMD11  |
|  | PSMD12  |
|  | PSMD13  |
|  | PSMD14  |
|  | PSMD2   |
|  | PSMD3   |
|  | PSMD4   |
|  | PSMD5   |
|  | PSMD6   |
|  | PSMD7   |
|  | PSMD8   |
|  | PSMD9   |
|  | PSME1   |
|  | PSME2   |
|  | PSME3   |
|  | PSME4   |
|  | PSMF1   |
|  | PSMG1   |
|  | PSMG2   |
|  | PSMG3   |
|  | PSMG4   |
|  | PSPC1   |
|  | PSPH    |
|  | PSTK    |
|  | PSTPIP2 |
|  | PTAR1   |
|  | PTBP1   |
|  | PTBP2   |
|  | PTCD1   |
|  | PTCD2   |
|  | PTDSS1  |
|  | PTDSS2  |
|  | PTEN    |
|  | PTGES2  |
|  | PTGES3  |
|  | PTGFRN  |
|  | PTGR1   |
|  | PTGR2   |
|  | PTK2    |
|  | PTK2B   |

|  |         |
|--|---------|
|  | PTMA    |
|  | PTMS    |
|  | PTOV1   |
|  | PTP4A1  |
|  | PTP4A2  |
|  | PTPLA   |
|  | PTPLAD1 |
|  | PTPLAD2 |
|  | PTPLB   |
|  | PTPMT1  |
|  | PTPN1   |
|  | PTPN11  |
|  | PTPN12  |
|  | PTPN2   |
|  | PTPN23  |
|  | PTPN3   |
|  | PTPN4   |
|  | PTPN6   |
|  | PTPN7   |
|  | PTPN9   |
|  | PTPRA   |
|  | PTPRD   |
|  | PTPRE   |
|  | PTPRF   |
|  | PTPRG   |
|  | PTPRK   |
|  | PTPRM   |
|  | PTPRU   |
|  | PTRF    |
|  | PTRH1   |
|  | PTRH2   |
|  | PTS     |
|  | PTTG1   |
|  | PTTG1IP |
|  | PUF60   |
|  | PUM1    |
|  | PUM2    |
|  | PURA    |
|  | PURB    |
|  | PURG    |
|  | PUS1    |
|  | PUS3    |
|  | PUS7    |
|  | PUSL1   |
|  | PVR     |
|  | PVRL1   |
|  | PVRL2   |
|  | PVRL3   |
|  | PWP1    |
|  | PWWP2B  |
|  | PXDN    |
|  | PXK     |
|  | PXMP2   |
|  | PXMP3   |
|  | PXMP4   |
|  | PXN     |

|  |           |
|--|-----------|
|  | PYCARD    |
|  | PYCR1     |
|  | PYCR2     |
|  | PYGB      |
|  | PYGL      |
|  | QARS      |
|  | QDPR      |
|  | QKI       |
|  | QPCT      |
|  | QPRT      |
|  | QRFPR     |
|  | QRICH1    |
|  | QSER1     |
|  | QSOX1     |
|  | QSOX2     |
|  | QTRT1     |
|  | QTRTD1    |
|  | R3HCC1    |
|  | R3HDM1    |
|  | R3HDM2    |
|  | RAB10     |
|  | RAB11A    |
|  | RAB11FIP1 |
|  | RAB11FIP2 |
|  | RAB11FIP3 |
|  | RAB11FIP5 |
|  | RAB12     |
|  | RAB13     |
|  | RAB14     |
|  | RAB15     |
|  | RAB17     |
|  | RAB18     |
|  | RAB1A     |
|  | RAB1B     |
|  | RAB20     |
|  | RAB21     |
|  | RAB22A    |
|  | RAB23     |
|  | RAB24     |
|  | RAB28     |
|  | RAB2A     |
|  | RAB2B     |
|  | RAB31     |
|  | RAB32     |
|  | RAB33B    |
|  | RAB35     |
|  | RAB37     |
|  | RAB3GAP1  |
|  | RAB3GAP2  |
|  | RAB3IL1   |
|  | RAB3IP    |
|  | RAB40B    |
|  | RAB40C    |
|  | RAB43     |
|  | RAB4A     |
|  | RAB4B     |

|  |          |
|--|----------|
|  | RAB5A    |
|  | RAB5B    |
|  | RAB5C    |
|  | RAB6A    |
|  | RAB6B    |
|  | RAB7A    |
|  | RAB8A    |
|  | RAB8B    |
|  | RAB9A    |
|  | RABAC1   |
|  | RABEP1   |
|  | RABEPK   |
|  | RABGAP1  |
|  | RABGAP1L |
|  | RABGEF1  |
|  | RABGGTA  |
|  | RABGGTB  |
|  | RABIF    |
|  | RABL2A   |
|  | RABL2B   |
|  | RABL3    |
|  | RABL4    |
|  | RAC1     |
|  | RAC2     |
|  | RAC3     |
|  | RAD1     |
|  | RAD17    |
|  | RAD21    |
|  | RAD23A   |
|  | RAD23B   |
|  | RAD50    |
|  | RAD51    |
|  | RAD51C   |
|  | RAD51L1  |
|  | RAD51L3  |
|  | RAD54L2  |
|  | RAD9A    |
|  | RAE1     |
|  | RAF1     |
|  | RAG1AP1  |
|  | RAGE     |
|  | RAI1     |
|  | RAI14    |
|  | RALA     |
|  | RALB     |
|  | RALBP1   |
|  | RALGAPA1 |
|  | RALGAPB  |
|  | RALGDS   |
|  | RALGPS1  |
|  | RALY     |
|  | RAN      |
|  | RANBP1   |
|  | RANBP10  |
|  | RANBP2   |
|  | RANBP3   |

|  |          |
|--|----------|
|  | RANBP6   |
|  | RANBP9   |
|  | RANGAP1  |
|  | RANGRF   |
|  | RAP1B    |
|  | RAP1BL   |
|  | RAP1GAP  |
|  | RAP1GDS1 |
|  | RAP2A    |
|  | RAP2C    |
|  | RAPGEF1  |
|  | RAPGEF2  |
|  | RAPGEF5  |
|  | RAPGEF6  |
|  | RAPGEFL1 |
|  | RAPH1    |
|  | RARA     |
|  | RARRES1  |
|  | RARRES2  |
|  | RARRES3  |
|  | RARS     |
|  | RARS2    |
|  | RASA1    |
|  | RASA4P   |
|  | RASAL3   |
|  | RASD1    |
|  | RASGRP2  |
|  | RASIP1   |
|  | RASL11A  |
|  | RASSF1   |
|  | RASSF2   |
|  | RASSF4   |
|  | RASSF5   |
|  | RASSF6   |
|  | RASSF7   |
|  | RAVER1   |
|  | RAXL1    |
|  | RB1CC1   |
|  | RBBP4    |
|  | RBBP5    |
|  | RBBP6    |
|  | RBBP7    |
|  | RBBP8    |
|  | RBBP9    |
|  | RBCK1    |
|  | RBED1    |
|  | RBKS     |
|  | RBL2     |
|  | RBM10    |
|  | RBM12    |
|  | RBM12B   |
|  | RBM14    |
|  | RBM15    |
|  | RBM15B   |
|  | RBM16    |
|  | RBM17    |



|  |         |
|--|---------|
|  | RBM18   |
|  | RBM22   |
|  | RBM23   |
|  | RBM25   |
|  | RBM26   |
|  | RBM27   |
|  | RBM28   |
|  | RBM3    |
|  | RBM33   |
|  | RBM34   |
|  | RBM38   |
|  | RBM39   |
|  | RBM4    |
|  | RBM41   |
|  | RBM42   |
|  | RBM45   |
|  | RBM47   |
|  | RBM4B   |
|  | RBM5    |
|  | RBM6    |
|  | RBM7    |
|  | RBM9    |
|  | RBMS1   |
|  | RBMX    |
|  | RBMX2   |
|  | RBMX2FP |
|  | RBP1    |
|  | RBP4    |
|  | RBP5    |
|  | RBP7    |
|  | RBPJ    |
|  | RBPMS   |
|  | RBPMS2  |
|  | RBX1    |
|  | RC3H2   |
|  | RCADH5  |
|  | RCAN1   |
|  | RCBTB2  |
|  | RCC2    |
|  | RCCD1   |
|  | RCE1    |
|  | RCHY1   |
|  | RCL1    |
|  | RCN1    |
|  | RCN2    |
|  | RCN3    |
|  | RCOR3   |
|  | RDBP    |
|  | RDH10   |
|  | RDH11   |
|  | RDH13   |
|  | RDH14   |
|  | RDH16   |
|  | RDH5    |
|  | RDX     |
|  | REC8    |

|  |         |
|--|---------|
|  | RECQL   |
|  | REEP4   |
|  | REEP5   |
|  | REEP6   |
|  | RELA    |
|  | RELL1   |
|  | REPIN1  |
|  | REPS2   |
|  | RER1    |
|  | RERE    |
|  | RETSAT  |
|  | REV1    |
|  | REXO1   |
|  | REXO2   |
|  | REXO4   |
|  | RFC1    |
|  | RFC2    |
|  | RFC3    |
|  | RFC4    |
|  | RFC5    |
|  | RFESD   |
|  | RFFL    |
|  | RFK     |
|  | RFNG    |
|  | RFP     |
|  | RFPL4A  |
|  | RFTN1   |
|  | RFWD2   |
|  | RFWD3   |
|  | RFX1    |
|  | RFX4    |
|  | RFX5    |
|  | RFX7    |
|  | RFXANK  |
|  | RG9MTD1 |
|  | RG9MTD2 |
|  | RG9MTD3 |
|  | RGL1    |
|  | RGL2    |
|  | RGL4    |
|  | RGMA    |
|  | RGN     |
|  | RGS10   |
|  | RGS12   |
|  | RGS19   |
|  | RGS2    |
|  | RHBDD1  |
|  | RHBDD2  |
|  | RHBDD3  |
|  | RHBDF1  |
|  | RHBDF2  |
|  | RHBDL1  |
|  | RHBDL2  |
|  | RHEB    |
|  | RHOA    |
|  | RHOB    |

|  |          |
|--|----------|
|  | RHOBTB1  |
|  | RHOBTB3  |
|  | RHOC     |
|  | RHOD     |
|  | RHOG     |
|  | RHOQ     |
|  | RHOT1    |
|  | RHOT2    |
|  | RHOU     |
|  | RHPN2    |
|  | RIC8A    |
|  | RIC8B    |
|  | RICH2    |
|  | RICS     |
|  | RIF1     |
|  | RILPL1   |
|  | RILPL2   |
|  | RIMBP3   |
|  | RIN2     |
|  | RING1    |
|  | RINT1    |
|  | RIOK1    |
|  | RIOK2    |
|  | RIOK3    |
|  | RIPK1    |
|  | RIPK2    |
|  | RIPK4    |
|  | RIPK5    |
|  | RIT1     |
|  | RLF      |
|  | RMI1     |
|  | RMND1    |
|  | RMND5A   |
|  | RMND5B   |
|  | RN5S9    |
|  | RN7SK    |
|  | RN7SL1   |
|  | RNASE1   |
|  | RNASE10  |
|  | RNASE4   |
|  | RNASEH1  |
|  | RNASEH2A |
|  | RNASEH2B |
|  | RNASEK   |
|  | RNASEL   |
|  | RNASEN   |
|  | RNASET2  |
|  | RND2     |
|  | RND3     |
|  | RNF10    |
|  | RNF103   |
|  | RNF11    |
|  | RNF112   |
|  | RNF113A  |
|  | RNF114   |
|  | RNF115   |

|  |         |
|--|---------|
|  | RNF121  |
|  | RNF122  |
|  | RNF123  |
|  | RNF126  |
|  | RNF128  |
|  | RNF13   |
|  | RNF130  |
|  | RNF135  |
|  | RNF138  |
|  | RNF14   |
|  | RNF141  |
|  | RNF144  |
|  | RNF144B |
|  | RNF145  |
|  | RNF146  |
|  | RNF149  |
|  | RNF160  |
|  | RNF165  |
|  | RNF166  |
|  | RNF167  |
|  | RNF169  |
|  | RNF170  |
|  | RNF181  |
|  | RNF185  |
|  | RNF187  |
|  | RNF19A  |
|  | RNF19B  |
|  | RNF20   |
|  | RNF213  |
|  | RNF214  |
|  | RNF215  |
|  | RNF216  |
|  | RNF216L |
|  | RNF219  |
|  | RNF220  |
|  | RNF24   |
|  | RNF25   |
|  | RNF26   |
|  | RNF31   |
|  | RNF32   |
|  | RNF34   |
|  | RNF38   |
|  | RNF4    |
|  | RNF40   |
|  | RNF41   |
|  | RNF44   |
|  | RNF5    |
|  | RNF5P1  |
|  | RNF7    |
|  | RNF8    |
|  | RNFT1   |
|  | RNGTT   |
|  | RNH1    |
|  | RNMT    |
|  | RNMTL1  |
|  | RNPC3   |

|  |               |
|--|---------------|
|  | RNPEP         |
|  | RNPEPL1       |
|  | RNPS1         |
|  | RNU1-3        |
|  | RNU1-5        |
|  | RNU1A3        |
|  | RNU1F1        |
|  | RNU1G2        |
|  | RNU6-1        |
|  | RNU6-15       |
|  | RNY1          |
|  | RNY3          |
|  | ROBLD3        |
|  | ROBO3         |
|  | ROCK1         |
|  | ROCK2         |
|  | ROD1          |
|  | ROGDI         |
|  | ROM1          |
|  | ROMO1         |
|  | RORA          |
|  | RP11-49G10.8  |
|  | RP11-529I10.4 |
|  | RP5-1022P6.2  |
|  | RP9           |
|  | RP9P          |
|  | RPA1          |
|  | RPA2          |
|  | RPA3          |
|  | RPAIN         |
|  | RPAP1         |
|  | RPAP2         |
|  | RPAP3         |
|  | RPE           |
|  | RPF1          |
|  | RPF2          |
|  | RPGR          |
|  | RPH3AL        |
|  | RPIA          |
|  | RPL10A        |
|  | RPL11         |
|  | RPL12         |
|  | RPL12P6       |
|  | RPL13         |
|  | RPL13A        |
|  | RPL13L        |
|  | RPL14         |
|  | RPL14L        |
|  | RPL15         |
|  | RPL17         |
|  | RPL18         |
|  | RPL18A        |
|  | RPL19         |
|  | RPL21         |
|  | RPL22         |
|  | RPL23         |

|  |           |
|--|-----------|
|  | RPL23A    |
|  | RPL23AP13 |
|  | RPL23AP53 |
|  | RPL23AP7  |
|  | RPL24     |
|  | RPL26     |
|  | RPL26L1   |
|  | RPL27     |
|  | RPL27A    |
|  | RPL28     |
|  | RPL29     |
|  | RPL29P2   |
|  | RPL3      |
|  | RPL30     |
|  | RPL31     |
|  | RPL31P10  |
|  | RPL32     |
|  | RPL34     |
|  | RPL35     |
|  | RPL35A    |
|  | RPL36     |
|  | RPL36A    |
|  | RPL36AL   |
|  | RPL37     |
|  | RPL37A    |
|  | RPL38     |
|  | RPL39     |
|  | RPL39L    |
|  | RPL4      |
|  | RPL41     |
|  | RPL5      |
|  | RPL6      |
|  | RPL7      |
|  | RPL7A     |
|  | RPL7L1    |
|  | RPL8      |
|  | RPL9      |
|  | RPLP0     |
|  | RPLP1     |
|  | RPLP2     |
|  | RPN1      |
|  | RPN2      |
|  | RPP14     |
|  | RPP21     |
|  | RPP38     |
|  | RPP40     |
|  | RPRC1     |
|  | RPRD1A    |
|  | RPRD1B    |
|  | RPRD2     |
|  | RPS10     |
|  | RPS10P3   |
|  | RPS11     |
|  | RPS12     |
|  | RPS13     |
|  | RPS14     |

|  |          |
|--|----------|
|  | RPS15    |
|  | RPS15A   |
|  | RPS16    |
|  | RPS17    |
|  | RPS18    |
|  | RPS19    |
|  | RPS19BP1 |
|  | RPS2     |
|  | RPS20    |
|  | RPS21    |
|  | RPS23    |
|  | RPS24    |
|  | RPS25    |
|  | RPS26    |
|  | RPS26L   |
|  | RPS26P10 |
|  | RPS26P11 |
|  | RPS27    |
|  | RPS27A   |
|  | RPS27L   |
|  | RPS28    |
|  | RPS29    |
|  | RPS3     |
|  | RPS3A    |
|  | RPS4X    |
|  | RPS4Y1   |
|  | RPS4Y2   |
|  | RPS5     |
|  | RPS6     |
|  | RPS6KA1  |
|  | RPS6KA2  |
|  | RPS6KA3  |
|  | RPS6KA4  |
|  | RPS6KA5  |
|  | RPS6KB1  |
|  | RPS6KB2  |
|  | RPS6KC1  |
|  | RPS6KL1  |
|  | RPS6P1   |
|  | RPS7     |
|  | RPS8     |
|  | RPS9     |
|  | RPSA     |
|  | RPUSD1   |
|  | RPUSD2   |
|  | RPUSD3   |
|  | RPUSD4   |
|  | RQCD1    |
|  | RRAGA    |
|  | RRAGB    |
|  | RRAGC    |
|  | RRAGD    |
|  | RRAS     |
|  | RRAS2    |
|  | RRBP1    |
|  | RREB1    |

|  |         |
|--|---------|
|  | RRM1    |
|  | RRM2B   |
|  | RRN3    |
|  | RRP12   |
|  | RRP15   |
|  | RRP1B   |
|  | RRP7A   |
|  | RRP7B   |
|  | RRP8    |
|  | RRP9    |
|  | RRS1    |
|  | RSAD1   |
|  | RSBN1   |
|  | RSC1A1  |
|  | RSL1D1  |
|  | RSL24D1 |
|  | RSPH3   |
|  | RSPH9   |
|  | RSPRY1  |
|  | RSRC1   |
|  | RSRC2   |
|  | RSU1    |
|  | RTCD1   |
|  | RTEL1   |
|  | RTF1    |
|  | RTKN    |
|  | RTN3    |
|  | RTN4    |
|  | RTN4IP1 |
|  | RTTN    |
|  | RUFY1   |
|  | RUFY3   |
|  | RUNDC1  |
|  | RUNDC2C |
|  | RUNX1   |
|  | RUNX1T1 |
|  | RUNX2   |
|  | RUNX3   |
|  | RUSC1   |
|  | RUSC2   |
|  | RUVBL1  |
|  | RUVBL2  |
|  | RWDD1   |
|  | RWDD2A  |
|  | RWDD2B  |
|  | RWDD3   |
|  | RWDD4A  |
|  | RXRA    |
|  | RXRB    |
|  | RXRG    |
|  | RYBP    |
|  | RYK     |
|  | S100A10 |
|  | S100A11 |
|  | S100A13 |
|  | S100A14 |



|  |          |
|--|----------|
|  | S100A16  |
|  | S100A4   |
|  | S100A6   |
|  | S100A9   |
|  | S100P    |
|  | S100PBP  |
|  | SAAL1    |
|  | SAC3D1   |
|  | SACM1L   |
|  | SAE1     |
|  | SAFB     |
|  | SAFB2    |
|  | SAMD11   |
|  | SAMD4A   |
|  | SAMD4B   |
|  | SAMD6    |
|  | SAMM50   |
|  | SAP130   |
|  | SAP18    |
|  | SAP30    |
|  | SAP30BP  |
|  | SAP30L   |
|  | SAPS1    |
|  | SAPS2    |
|  | SAPS3    |
|  | SAR1A    |
|  | SAR1B    |
|  | SARS     |
|  | SARS2    |
|  | SART3    |
|  | SASH1    |
|  | SAT1     |
|  | SAT2     |
|  | SATB2    |
|  | SAV1     |
|  | SBDS     |
|  | SBDSP    |
|  | SBF1     |
|  | SBF2     |
|  | SBK1     |
|  | SBNO2    |
|  | SC4MOL   |
|  | SC5DL    |
|  | SC65     |
|  | SCAMP1   |
|  | SCAMP2   |
|  | SCAMP3   |
|  | SCAMP4   |
|  | SCAND1   |
|  | SCAP     |
|  | SCAPER   |
|  | SCARB1   |
|  | SCARB2   |
|  | SCARNA10 |
|  | SCARNA13 |
|  | SCARNA9  |

|  |          |
|--|----------|
|  | SCCPDH   |
|  | SCD      |
|  | SCFD1    |
|  | SCFD2    |
|  | SCG5     |
|  | SCGB3A2  |
|  | SCHIP1   |
|  | SCLY     |
|  | SCMH1    |
|  | SCML1    |
|  | SCML2    |
|  | SCNM1    |
|  | SCNN1A   |
|  | SCNN1D   |
|  | SCO1     |
|  | SCO2     |
|  | SCOC     |
|  | SCP2     |
|  | SCPEP1   |
|  | SCRIB    |
|  | SCRN2    |
|  | SCYL1    |
|  | SCYL1BP1 |
|  | SCYL2    |
|  | SCYL3    |
|  | SDAD1    |
|  | SDC1     |
|  | SDC2     |
|  | SDC3     |
|  | SDC4     |
|  | SDCBP    |
|  | SDCCAG1  |
|  | SDCCAG10 |
|  | SDCCAG3  |
|  | SDF2     |
|  | SDF2L1   |
|  | SDF4     |
|  | SDHA     |
|  | SDHAF1   |
|  | SDHAF2   |
|  | SDHALP1  |
|  | SDHAP2   |
|  | SDHAP3   |
|  | SDHB     |
|  | SDHC     |
|  | SDHD     |
|  | SDSL     |
|  | SEC11A   |
|  | SEC11C   |
|  | SEC13    |
|  | SEC14L1  |
|  | SEC16A   |
|  | SEC22A   |
|  | SEC22B   |
|  | SEC22C   |
|  | SEC23A   |

|  |           |
|--|-----------|
|  | SEC23B    |
|  | SEC23IP   |
|  | SEC24A    |
|  | SEC24B    |
|  | SEC24C    |
|  | SEC24D    |
|  | SEC31A    |
|  | SEC61A1   |
|  | SEC61B    |
|  | SEC61G    |
|  | SEC62     |
|  | SEC63     |
|  | SECISBP2  |
|  | SECISBP2L |
|  | SEH1L     |
|  | SEL1L     |
|  | SEL1L3    |
|  | SELENBP1  |
|  | SELI      |
|  | SELK      |
|  | SELM      |
|  | SELO      |
|  | SELS      |
|  | SELT      |
|  | SEMA3E    |
|  | SEMA4B    |
|  | SEMA4C    |
|  | SEMA4F    |
|  | SEMA4G    |
|  | SEMA6B    |
|  | SEMA6C    |
|  | SENP2     |
|  | SENP5     |
|  | SENP6     |
|  | SENP7     |
|  | SEP15     |
|  | SEPHS1    |
|  | SEPHS2    |
|  | SEPN1     |
|  | SEPP1     |
|  | SEPSECS   |
|  | SEPT11    |
|  | SEPT2     |
|  | SEPT4     |
|  | SEPT5     |
|  | SEPT6     |
|  | SEPT7     |
|  | SEPT9     |
|  | SEPW1     |
|  | SEPX1     |
|  | SERAC1    |
|  | SERBP1    |
|  | SERF1B    |
|  | SERF2     |
|  | SERGEF    |
|  | SERINC1   |

|  |           |
|--|-----------|
|  | SERINC2   |
|  | SERINC3   |
|  | SERP1     |
|  | SERP2     |
|  | SERPINA1  |
|  | SERPINA10 |
|  | SERPINA3  |
|  | SERPINA5  |
|  | SERPINB1  |
|  | SERPINB6  |
|  | SERPINB8  |
|  | SERPINC1  |
|  | SERPINE1  |
|  | SERPINE2  |
|  | SERPINF1  |
|  | SERPINF2  |
|  | SERPING1  |
|  | SERPINH1  |
|  | SERTAD1   |
|  | SERTAD2   |
|  | SERTAD3   |
|  | SESN1     |
|  | SESN2     |
|  | SESTD1    |
|  | SET       |
|  | SETBP1    |
|  | SETD1A    |
|  | SETD1B    |
|  | SETD2     |
|  | SETD3     |
|  | SETD4     |
|  | SETD5     |
|  | SETD6     |
|  | SETD8     |
|  | SETDB1    |
|  | SETDB2    |
|  | SETMAR    |
|  | SETX      |
|  | SF1       |
|  | SF3A1     |
|  | SF3A2     |
|  | SF3A3     |
|  | SF3B1     |
|  | SF3B14    |
|  | SF3B2     |
|  | SF3B3     |
|  | SF3B4     |
|  | SF3B5     |
|  | SF4       |
|  | SFMBT1    |
|  | SFPQ      |
|  | SFRS1     |
|  | SFRS10    |
|  | SFRS11    |
|  | SFRS12    |
|  | SFRS13A   |

|  |          |
|--|----------|
|  | SFRS14   |
|  | SFRS15   |
|  | SFRS16   |
|  | SFRS17A  |
|  | SFRS18   |
|  | SFRS2    |
|  | SFRS2B   |
|  | SFRS2IP  |
|  | SFRS3    |
|  | SFRS4    |
|  | SFRS5    |
|  | SFRS6    |
|  | SFRS7    |
|  | SFRS8    |
|  | SFRS9    |
|  | SFT2D1   |
|  | SFT2D2   |
|  | SFT2D3   |
|  | SFXN1    |
|  | SFXN2    |
|  | SFXN4    |
|  | SFXN5    |
|  | SGCE     |
|  | SGK      |
|  | SGK1     |
|  | SGK3     |
|  | SGMS1    |
|  | SGPL1    |
|  | SGSH     |
|  | SGSM2    |
|  | SGSM3    |
|  | SGTA     |
|  | SH2B1    |
|  | SH2B3    |
|  | SH2D1A   |
|  | SH2D4A   |
|  | SH2D5    |
|  | SH3BGRL  |
|  | SH3BGRL2 |
|  | SH3BGRL3 |
|  | SH3BP4   |
|  | SH3BP5L  |
|  | SH3D19   |
|  | SH3GL1   |
|  | SH3GLB1  |
|  | SH3GLB2  |
|  | SH3KBP1  |
|  | SH3PXD2A |
|  | SH3RF1   |
|  | SH3RF2   |
|  | SH3TC1   |
|  | SH3YL1   |
|  | SHANK2   |
|  | SHANK3   |
|  | SHARPIN  |
|  | SHB      |

|  |         |
|--|---------|
|  | SHBG    |
|  | SHC1    |
|  | SHC2    |
|  | SHCBP1  |
|  | SHF     |
|  | SHFM1   |
|  | SHISA5  |
|  | SHKBP1  |
|  | SHMT1   |
|  | SHMT2   |
|  | SHOC2   |
|  | SHPK    |
|  | SHQ1    |
|  | SHRM    |
|  | SHROOM2 |
|  | SHROOM3 |
|  | SHROOM4 |
|  | SIAE    |
|  | SIAH1   |
|  | SIAH2   |
|  | SIDT2   |
|  | SIGIRR  |
|  | SIGLEC6 |
|  | SIGMAR1 |
|  | SIK1    |
|  | SIK2    |
|  | SIK3    |
|  | SIL1    |
|  | SILV    |
|  | SIN3A   |
|  | SIN3B   |
|  | SIP1    |
|  | SIPA1   |
|  | SIPA1L1 |
|  | SIPA1L2 |
|  | SIPA1L3 |
|  | SIRPA   |
|  | SIRT1   |
|  | SIRT2   |
|  | SIRT4   |
|  | SIRT5   |
|  | SIRT7   |
|  | SIVA    |
|  | SIVA1   |
|  | SIX5    |
|  | SKA2    |
|  | SKAP2   |
|  | SKI     |
|  | SKIV2L  |
|  | SKIV2L2 |
|  | SKP1    |
|  | SKP1A   |
|  | SKP2    |
|  | SLAIN1  |
|  | SLAIN2  |
|  | SLBP    |

|  |            |
|--|------------|
|  | SLC10A1    |
|  | SLC10A3    |
|  | SLC10A7    |
|  | SLC11A2    |
|  | SLC12A2    |
|  | SLC12A4    |
|  | SLC12A8    |
|  | SLC12A9    |
|  | SLC13A5    |
|  | SLC15A1    |
|  | SLC15A3    |
|  | SLC15A4    |
|  | SLC16A10   |
|  | SLC16A12   |
|  | SLC16A2    |
|  | SLC16A4    |
|  | SLC16A5    |
|  | SLC19A1    |
|  | SLC19A2    |
|  | SLC19A3    |
|  | SLC1A4     |
|  | SLC20A1    |
|  | SLC20A2    |
|  | SLC22A1    |
|  | SLC22A17   |
|  | SLC22A18   |
|  | SLC22A18AS |
|  | SLC22A23   |
|  | SLC22A5    |
|  | SLC22A7    |
|  | SLC23A1    |
|  | SLC23A2    |
|  | SLC23A3    |
|  | SLC24A1    |
|  | SLC24A2    |
|  | SLC24A6    |
|  | SLC25A1    |
|  | SLC25A10   |
|  | SLC25A11   |
|  | SLC25A12   |
|  | SLC25A13   |
|  | SLC25A14   |
|  | SLC25A15   |
|  | SLC25A16   |
|  | SLC25A17   |
|  | SLC25A18   |
|  | SLC25A19   |
|  | SLC25A20   |
|  | SLC25A22   |
|  | SLC25A23   |
|  | SLC25A25   |
|  | SLC25A26   |
|  | SLC25A28   |
|  | SLC25A29   |
|  | SLC25A3    |
|  | SLC25A34   |

|  |          |
|--|----------|
|  | SLC25A37 |
|  | SLC25A38 |
|  | SLC25A39 |
|  | SLC25A4  |
|  | SLC25A40 |
|  | SLC25A42 |
|  | SLC25A43 |
|  | SLC25A44 |
|  | SLC25A45 |
|  | SLC25A46 |
|  | SLC25A5  |
|  | SLC25A6  |
|  | SLC26A11 |
|  | SLC26A2  |
|  | SLC26A6  |
|  | SLC27A1  |
|  | SLC27A2  |
|  | SLC27A3  |
|  | SLC27A5  |
|  | SLC29A1  |
|  | SLC29A2  |
|  | SLC29A3  |
|  | SLC29A4  |
|  | SLC2A1   |
|  | SLC2A10  |
|  | SLC2A11  |
|  | SLC2A12  |
|  | SLC2A3   |
|  | SLC2A4RG |
|  | SLC2A8   |
|  | SLC30A1  |
|  | SLC30A3  |
|  | SLC30A5  |
|  | SLC30A7  |
|  | SLC30A9  |
|  | SLC31A1  |
|  | SLC31A2  |
|  | SLC33A1  |
|  | SLC35A1  |
|  | SLC35A2  |
|  | SLC35A3  |
|  | SLC35A4  |
|  | SLC35A5  |
|  | SLC35B1  |
|  | SLC35B2  |
|  | SLC35B3  |
|  | SLC35C1  |
|  | SLC35C2  |
|  | SLC35D2  |
|  | SLC35E1  |
|  | SLC35E3  |
|  | SLC35F5  |
|  | SLC36A1  |
|  | SLC36A4  |
|  | SLC37A1  |
|  | SLC37A3  |



|  |          |
|--|----------|
|  | SLC37A4  |
|  | SLC38A1  |
|  | SLC38A10 |
|  | SLC38A2  |
|  | SLC38A5  |
|  | SLC38A6  |
|  | SLC38A7  |
|  | SLC38A9  |
|  | SLC39A1  |
|  | SLC39A11 |
|  | SLC39A14 |
|  | SLC39A3  |
|  | SLC39A4  |
|  | SLC39A5  |
|  | SLC39A6  |
|  | SLC39A7  |
|  | SLC39A8  |
|  | SLC39A9  |
|  | SLC3A2   |
|  | SLC40A1  |
|  | SLC41A1  |
|  | SLC41A3  |
|  | SLC43A1  |
|  | SLC43A3  |
|  | SLC44A1  |
|  | SLC44A2  |
|  | SLC44A3  |
|  | SLC44A4  |
|  | SLC45A3  |
|  | SLC46A3  |
|  | SLC47A1  |
|  | SLC48A1  |
|  | SLC4A1AP |
|  | SLC4A2   |
|  | SLC4A4   |
|  | SLC4A5   |
|  | SLC4A7   |
|  | SLC5A10  |
|  | SLC5A12  |
|  | SLC5A6   |
|  | SLC5A8   |
|  | SLC5A9   |
|  | SLC6A10P |
|  | SLC6A12  |
|  | SLC6A16  |
|  | SLC6A9   |
|  | SLC7A1   |
|  | SLC7A2   |
|  | SLC7A3   |
|  | SLC7A5   |
|  | SLC7A6   |
|  | SLC7A6OS |
|  | SLC7A7   |
|  | SLC7A9   |
|  | SLC9A1   |
|  | SLC9A3R1 |

|  |         |
|--|---------|
|  | SLC9A6  |
|  | SLC9A7  |
|  | SLC9A8  |
|  | SLCO1B1 |
|  | SLCO2B1 |
|  | SLCO4A1 |
|  | SLCO4C1 |
|  | SLFN11  |
|  | SLK     |
|  | SLMAP   |
|  | SLTM    |
|  | SLU7    |
|  | SMA4    |
|  | SMAD2   |
|  | SMAD3   |
|  | SMAD4   |
|  | SMAD5   |
|  | SMAD7   |
|  | SMAGP   |
|  | SMAP1   |
|  | SMAP2   |
|  | SMARCA1 |
|  | SMARCA2 |
|  | SMARCA4 |
|  | SMARCA5 |
|  | SMARCA1 |
|  | SMARCA1 |
|  | SMARCB1 |
|  | SMARCC1 |
|  | SMARCC2 |
|  | SMARCD1 |
|  | SMARCD2 |
|  | SMARCE1 |
|  | SMC2    |
|  | SMC3    |
|  | SMC4    |
|  | SMCR5   |
|  | SMCR7L  |
|  | SMEK2   |
|  | SMG1    |
|  | SMG5    |
|  | SMG7    |
|  | SMN1    |
|  | SMNDC1  |
|  | SMO     |
|  | SMOX    |
|  | SMPD1   |
|  | SMPD2   |
|  | SMPDL3A |
|  | SMS     |
|  | SMTN    |
|  | SMU1    |
|  | SMUG1   |
|  | SMURF1  |
|  | SMYD2   |
|  | SMYD3   |

|  |            |
|--|------------|
|  | SMYD4      |
|  | SNAI2      |
|  | SNAP23     |
|  | SNAP29     |
|  | SNAP47     |
|  | SNAPC1     |
|  | SNAPC2     |
|  | SNAPC3     |
|  | SNAPC4     |
|  | SNAPC5     |
|  | SNAPIN     |
|  | SND1       |
|  | SNF8       |
|  | SNHG1      |
|  | SNHG11     |
|  | SNHG12     |
|  | SNHG3-RCC1 |
|  | SNHG5      |
|  | SNHG6      |
|  | SNHG7      |
|  | SNHG8      |
|  | SNHG9      |
|  | SNIP1      |
|  | SNN        |
|  | SNORA10    |
|  | SNORA11D   |
|  | SNORA12    |
|  | SNORA18    |
|  | SNORA24    |
|  | SNORA25    |
|  | SNORA32    |
|  | SNORA33    |
|  | SNORA41    |
|  | SNORA45    |
|  | SNORA57    |
|  | SNORA58    |
|  | SNORA59A   |
|  | SNORA59B   |
|  | SNORA5C    |
|  | SNORA6     |
|  | SNORA61    |
|  | SNORA62    |
|  | SNORA67    |
|  | SNORA68    |
|  | SNORA70    |
|  | SNORA70C   |
|  | SNORA76    |
|  | SNORA7B    |
|  | SNORA8     |
|  | SNORA80    |
|  | SNORD104   |
|  | SNORD114-2 |
|  | SNORD14A   |
|  | SNORD22    |
|  | SNORD31    |
|  | SNORD35B   |

|  |          |
|--|----------|
|  | SNORD36A |
|  | SNORD36C |
|  | SNORD3A  |
|  | SNORD3C  |
|  | SNORD3D  |
|  | SNORD49A |
|  | SNORD4A  |
|  | SNORD57  |
|  | SNORD6   |
|  | SNORD65  |
|  | SNORD68  |
|  | SNORD78  |
|  | SNORD83B |
|  | SNORD87  |
|  | SNORD89  |
|  | SNORD99  |
|  | SNRK     |
|  | SNRNP200 |
|  | SNRNP25  |
|  | SNRNP27  |
|  | SNRNP35  |
|  | SNRNP40  |
|  | SNRNP48  |
|  | SNRNP70  |
|  | SNRPA    |
|  | SNRPA1   |
|  | SNRPB    |
|  | SNRPB2   |
|  | SNRPC    |
|  | SNRPD1   |
|  | SNRPD2   |
|  | SNRPD3   |
|  | SNRPF    |
|  | SNRPG    |
|  | SNRPN    |
|  | SNTA1    |
|  | SNTB1    |
|  | SNTB2    |
|  | SNUPN    |
|  | SNURF    |
|  | SNW1     |
|  | SNX1     |
|  | SNX10    |
|  | SNX11    |
|  | SNX13    |
|  | SNX14    |
|  | SNX16    |
|  | SNX17    |
|  | SNX19    |
|  | SNX2     |
|  | SNX21    |
|  | SNX22    |
|  | SNX24    |
|  | SNX25    |
|  | SNX26    |
|  | SNX27    |

|  |          |
|--|----------|
|  | SNX29    |
|  | SNX3     |
|  | SNX30    |
|  | SNX33    |
|  | SNX4     |
|  | SNX5     |
|  | SNX6     |
|  | SNX7     |
|  | SNX8     |
|  | SOAT2    |
|  | SOCS1    |
|  | SOCS2    |
|  | SOCS3    |
|  | SOCS4    |
|  | SOCS5    |
|  | SOCS6    |
|  | SOD1     |
|  | SOD2     |
|  | SOLH     |
|  | SON      |
|  | SORBS1   |
|  | SORBS2   |
|  | SORBS3   |
|  | SORD     |
|  | SORL1    |
|  | SORT1    |
|  | SOX13    |
|  | SOX18    |
|  | SOX4     |
|  | SOX7     |
|  | SOX8     |
|  | SOX9     |
|  | SP1      |
|  | SP110    |
|  | SP140    |
|  | SP2      |
|  | SP3      |
|  | SP4      |
|  | SPA17    |
|  | SPAG16   |
|  | SPAG7    |
|  | SPAG9    |
|  | SPARC    |
|  | SPARCL1  |
|  | SPAST    |
|  | SPATA13  |
|  | SPATA2   |
|  | SPATA20  |
|  | SPATA2L  |
|  | SPATA5L1 |
|  | SPATA7   |
|  | SPATC1   |
|  | SPATS2   |
|  | SPATS2L  |
|  | SPC24    |
|  | SPCS1    |

|  |         |
|--|---------|
|  | SPCS2   |
|  | SPCS3   |
|  | SPEN    |
|  | SPG11   |
|  | SPG21   |
|  | SPG3A   |
|  | SPG7    |
|  | SPHAR   |
|  | SPHK1   |
|  | SPHK2   |
|  | SPIN1   |
|  | SPIN3   |
|  | SPIN4   |
|  | SPINK1  |
|  | SPINT2  |
|  | SPINT3  |
|  | SPIRE1  |
|  | SPIRE2  |
|  | SPN     |
|  | SPNS1   |
|  | SPNS2   |
|  | SPOP    |
|  | SPOPL   |
|  | SPP1    |
|  | SPPL2A  |
|  | SPPL2B  |
|  | SPPL3   |
|  | SPR     |
|  | SPRED1  |
|  | SPRED2  |
|  | SPRN    |
|  | SPRR1A  |
|  | SPRY1   |
|  | SPRY2   |
|  | SPRY4   |
|  | SPRYD3  |
|  | SPRYD4  |
|  | SPSB1   |
|  | SPSB2   |
|  | SPSB3   |
|  | SPTAN1  |
|  | SPTBN1  |
|  | SPTBN2  |
|  | SPTLC1  |
|  | SPTLC3  |
|  | SPTY2D1 |
|  | SQLE    |
|  | SQSTM1  |
|  | SR140   |
|  | SRA1    |
|  | SRBD1   |
|  | SRC     |
|  | SRCAP   |
|  | SRD5A1  |
|  | SREBF1  |
|  | SREBF2  |

|  |            |
|--|------------|
|  | SRF        |
|  | SRFBP1     |
|  | SRGAP2     |
|  | SRGAP3     |
|  | SRI        |
|  | SRM        |
|  | SRP14      |
|  | SRP14P1    |
|  | SRP19      |
|  | SRP54      |
|  | SRP68      |
|  | SRP72      |
|  | SRP9       |
|  | SRPK1      |
|  | SRPK2      |
|  | SRPR       |
|  | SRPRB      |
|  | SRPX2      |
|  | SRRD       |
|  | SRRM1      |
|  | SRRM1L     |
|  | SRRM2      |
|  | SRXN1      |
|  | SS18       |
|  | SS18L1     |
|  | SS18L2     |
|  | SSB        |
|  | SSBP1      |
|  | SSBP2      |
|  | SSBP3      |
|  | SSBP4      |
|  | SSFA2      |
|  | SSH2       |
|  | SSH3       |
|  | SSNA1      |
|  | SSPO       |
|  | SSR1       |
|  | SSR2       |
|  | SSR3       |
|  | SSR4       |
|  | SSRP1      |
|  | SSSCA1     |
|  | SSTR2      |
|  | SSU72      |
|  | ST13       |
|  | ST3GAL1    |
|  | ST3GAL2    |
|  | ST3GAL3    |
|  | ST3GAL4    |
|  | ST3GAL5    |
|  | ST3GAL6    |
|  | ST5        |
|  | ST6GAL1    |
|  | ST6GALNAC2 |
|  | ST6GALNAC4 |
|  | ST6GALNAC6 |

|  |          |
|--|----------|
|  | ST7      |
|  | ST7L     |
|  | STAG1    |
|  | STAG2    |
|  | STAG3L1  |
|  | STAG3L2  |
|  | STAG3L3  |
|  | STAG3L4  |
|  | STAM     |
|  | STAM2    |
|  | STAMPB   |
|  | STAMBPL1 |
|  | STAP2    |
|  | STARD10  |
|  | STARD13  |
|  | STARD3   |
|  | STARD3NL |
|  | STARD5   |
|  | STARD7   |
|  | STARD8   |
|  | STAT1    |
|  | STAT2    |
|  | STAT3    |
|  | STAT4    |
|  | STAT5A   |
|  | STAT5B   |
|  | STAT6    |
|  | STAU1    |
|  | STAU2    |
|  | STBD1    |
|  | STEAP1   |
|  | STEAP3   |
|  | STIL     |
|  | STIM1    |
|  | STIM2    |
|  | STIP1    |
|  | STK10    |
|  | STK11    |
|  | STK11IP  |
|  | STK16    |
|  | STK17B   |
|  | STK19    |
|  | STK24    |
|  | STK25    |
|  | STK3     |
|  | STK32C   |
|  | STK35    |
|  | STK36    |
|  | STK38    |
|  | STK39    |
|  | STK4     |
|  | STK40    |
|  | STMN1    |
|  | STMN3    |
|  | STOM     |
|  | STOML1   |



|  |         |
|--|---------|
|  | STOML2  |
|  | STOX2   |
|  | STRA13  |
|  | STRADA  |
|  | STRADB  |
|  | STRAP   |
|  | STRBP   |
|  | STRN    |
|  | STRN3   |
|  | STRN4   |
|  | STS-1   |
|  | STT3A   |
|  | STT3B   |
|  | STUB1   |
|  | STX10   |
|  | STX12   |
|  | STX16   |
|  | STX1A   |
|  | STX2    |
|  | STX3    |
|  | STX4    |
|  | STX5    |
|  | STX6    |
|  | STX7    |
|  | STX8    |
|  | STXBP2  |
|  | STXBP3  |
|  | STXBP6  |
|  | STYXL1  |
|  | SUB1    |
|  | SUCLA2  |
|  | SUCLG1  |
|  | SUCLG2  |
|  | SUGT1   |
|  | SULF2   |
|  | SULT1A1 |
|  | SULT1A2 |
|  | SULT1A3 |
|  | SULT1A4 |
|  | SULT2A1 |
|  | SUMF1   |
|  | SUMF2   |
|  | SUMO1   |
|  | SUMO1P3 |
|  | SUMO2   |
|  | SUMO3   |
|  | SUOX    |
|  | SUPT16H |
|  | SUPT4H1 |
|  | SUPT5H  |
|  | SUPT6H  |
|  | SUPV3L1 |
|  | SURF1   |
|  | SURF2   |
|  | SURF4   |
|  | SURF6   |

|  |          |
|--|----------|
|  | SUSD1    |
|  | SUSD3    |
|  | SUV39H1  |
|  | SUV39H2  |
|  | SUV420H1 |
|  | SUV420H2 |
|  | SUZ12    |
|  | SVIL     |
|  | SWAP70   |
|  | SYAP1    |
|  | SYCE1L   |
|  | SYDE2    |
|  | SYF2     |
|  | SYMPK    |
|  | SYNCRIP  |
|  | SYNE2    |
|  | SYNGR1   |
|  | SYNJ1    |
|  | SYNJ2BP  |
|  | SYNM     |
|  | SYPL1    |
|  | SYS1     |
|  | SYT11    |
|  | SYT15    |
|  | SYT17    |
|  | SYT7     |
|  | SYTL2    |
|  | SYVN1    |
|  | TACC1    |
|  | TACC2    |
|  | TACO1    |
|  | TACSTD1  |
|  | TACSTD2  |
|  | TADA1L   |
|  | TADA2B   |
|  | TADA3    |
|  | TAF10    |
|  | TAF12    |
|  | TAF15    |
|  | TAF1B    |
|  | TAF1C    |
|  | TAF1D    |
|  | TAF2     |
|  | TAF4     |
|  | TAF5L    |
|  | TAF6     |
|  | TAF6L    |
|  | TAF7     |
|  | TAF9     |
|  | TAGLN    |
|  | TAGLN2   |
|  | TALDO1   |
|  | TANC1    |
|  | TANK     |
|  | TAOK1    |
|  | TAOK2    |

|  |          |
|--|----------|
|  | TAOK3    |
|  | TAP1     |
|  | TAPBP    |
|  | TAPT1    |
|  | TARBP2   |
|  | TARDBP   |
|  | TARS     |
|  | TARS2    |
|  | TASP1    |
|  | TATDN1   |
|  | TATDN2   |
|  | TATDN3   |
|  | TAX1BP1  |
|  | TAX1BP3  |
|  | TAZ      |
|  | TBC1D10A |
|  | TBC1D10B |
|  | TBC1D13  |
|  | TBC1D14  |
|  | TBC1D15  |
|  | TBC1D16  |
|  | TBC1D17  |
|  | TBC1D19  |
|  | TBC1D2   |
|  | TBC1D20  |
|  | TBC1D21  |
|  | TBC1D22A |
|  | TBC1D23  |
|  | TBC1D24  |
|  | TBC1D25  |
|  | TBC1D2B  |
|  | TBC1D3B  |
|  | TBC1D3F  |
|  | TBC1D3G  |
|  | TBC1D3I  |
|  | TBC1D4   |
|  | TBC1D7   |
|  | TBC1D8   |
|  | TBC1D8B  |
|  | TBC1D9   |
|  | TBC1D9B  |
|  | TBCA     |
|  | TBCB     |
|  | TBCC     |
|  | TBCCD1   |
|  | TBCD     |
|  | TBCE     |
|  | TBK1     |
|  | TBL1X    |
|  | TBL1XR1  |
|  | TBL2     |
|  | TBL3     |
|  | TBP      |
|  | TBPL1    |
|  | TBRG4    |
|  | TBX21    |

|  |          |
|--|----------|
|  | TBX3     |
|  | TCEA1    |
|  | TCEA2    |
|  | TCEA3    |
|  | TCEAL1   |
|  | TCEAL3   |
|  | TCEAL4   |
|  | TCEAL8   |
|  | TCEB1    |
|  | TCEB2    |
|  | TCEB3    |
|  | TCERG1   |
|  | TCF12    |
|  | TCF2     |
|  | TCF20    |
|  | TCF25    |
|  | TCF3     |
|  | TCF7L1   |
|  | TCFL5    |
|  | TCHP     |
|  | TCIRG1   |
|  | TCN2     |
|  | TCP1     |
|  | TCP10L   |
|  | TCP11L1  |
|  | TCTA     |
|  | TCTEX1D2 |
|  | TCTN1    |
|  | TCTN3    |
|  | TDG      |
|  | TDO2     |
|  | TDP1     |
|  | TDRD1    |
|  | TDRD3    |
|  | TDRD7    |
|  | TEAD2    |
|  | TEAD3    |
|  | TECPR1   |
|  | TECR     |
|  | TEF      |
|  | TELO2    |
|  | TERF1    |
|  | TERF2    |
|  | TERF2IP  |
|  | TESK1    |
|  | TESK2    |
|  | TEX10    |
|  | TEX2     |
|  | TEX261   |
|  | TEX264   |
|  | TF       |
|  | TFAM     |
|  | TFAMP1   |
|  | TFB1M    |
|  | TFB2M    |
|  | TFCP2    |

|  |          |
|--|----------|
|  | TFDP1    |
|  | TFDP2    |
|  | TFE3     |
|  | TFEC     |
|  | TFG      |
|  | TFIP11   |
|  | TFPI     |
|  | TFPT     |
|  | TFRC     |
|  | TGDS     |
|  | TGFB111  |
|  | TGFB3    |
|  | TGFBI    |
|  | TGFBR2   |
|  | TGFBR3   |
|  | TGFBRAP1 |
|  | TGIF1    |
|  | TGIF2    |
|  | TGM2     |
|  | TGM3     |
|  | TGOLN2   |
|  | TH1L     |
|  | THADA    |
|  | THAP1    |
|  | THAP10   |
|  | THAP11   |
|  | THAP6    |
|  | THAP7    |
|  | THAP8    |
|  | THBS1    |
|  | THBS3    |
|  | THEM2    |
|  | THNSL1   |
|  | THNSL2   |
|  | THOC1    |
|  | THOC2    |
|  | THOC3    |
|  | THOC4    |
|  | THOC5    |
|  | THOC6    |
|  | THOC7    |
|  | THOP1    |
|  | THRA     |
|  | THRAP3   |
|  | THRAP5   |
|  | THUMPD1  |
|  | THUMPD2  |
|  | THUMPD3  |
|  | THYN1    |
|  | TIA1     |
|  | TIAF1    |
|  | TIAL1    |
|  | TICAM1   |
|  | TICAM2   |
|  | TIFA     |
|  | TIGA1    |

|  |          |
|--|----------|
|  | TIGD2    |
|  | TIGD5    |
|  | TIGD6    |
|  | TIMELESS |
|  | TIMM10   |
|  | TIMM17B  |
|  | TIMM22   |
|  | TIMM23   |
|  | TIMM23B  |
|  | TIMM44   |
|  | TIMM8A   |
|  | TIMM8B   |
|  | TIMM9    |
|  | TIMP1    |
|  | TIMP2    |
|  | TIMP3    |
|  | TINF2    |
|  | TINP1    |
|  | TIPARP   |
|  | TIPIN    |
|  | TIPRL    |
|  | TIRAP    |
|  | TJAP1    |
|  | TJP1     |
|  | TJP2     |
|  | TJP3     |
|  | TK1      |
|  | TK2      |
|  | TKT      |
|  | TLCD1    |
|  | TLE1     |
|  | TLE2     |
|  | TLE4     |
|  | TLK1     |
|  | TLK2     |
|  | TLN1     |
|  | TLN2     |
|  | TLR6     |
|  | TM2D1    |
|  | TM2D2    |
|  | TM2D3    |
|  | TM4SF1   |
|  | TM4SF4   |
|  | TM4SF5   |
|  | TM6SF2   |
|  | TM7SF2   |
|  | TM7SF3   |
|  | TM9SF1   |
|  | TM9SF2   |
|  | TM9SF3   |
|  | TM9SF4   |
|  | TMBIM1   |
|  | TMBIM4   |
|  | TMBIM6   |
|  | TMC4     |
|  | TMCC1    |

|  |          |
|--|----------|
|  | TMCO1    |
|  | TMCO3    |
|  | TMCO6    |
|  | TMCO7    |
|  | TMED1    |
|  | TMED10   |
|  | TMED10P  |
|  | TMED2    |
|  | TMED3    |
|  | TMED4    |
|  | TMED5    |
|  | TMED7    |
|  | TMED9    |
|  | TMEM1    |
|  | TMEM101  |
|  | TMEM105  |
|  | TMEM106A |
|  | TMEM106B |
|  | TMEM106C |
|  | TMEM109  |
|  | TMEM11   |
|  | TMEM111  |
|  | TMEM115  |
|  | TMEM116  |
|  | TMEM120A |
|  | TMEM123  |
|  | TMEM126A |
|  | TMEM126B |
|  | TMEM127  |
|  | TMEM129  |
|  | TMEM131  |
|  | TMEM133  |
|  | TMEM134  |
|  | TMEM135  |
|  | TMEM136  |
|  | TMEM137  |
|  | TMEM138  |
|  | TMEM140  |
|  | TMEM141  |
|  | TMEM143  |
|  | TMEM144  |
|  | TMEM147  |
|  | TMEM149  |
|  | TMEM14A  |
|  | TMEM14B  |
|  | TMEM14C  |
|  | TMEM14D  |
|  | TMEM150A |
|  | TMEM156  |
|  | TMEM158  |
|  | TMEM159  |
|  | TMEM160  |
|  | TMEM161A |
|  | TMEM165  |
|  | TMEM166  |
|  | TMEM167A |

|  |                |
|--|----------------|
|  | TMEM167B       |
|  | TMEM16A        |
|  | TMEM17         |
|  | TMEM170A       |
|  | TMEM170B       |
|  | TMEM175        |
|  | TMEM176A       |
|  | TMEM177        |
|  | TMEM178        |
|  | TMEM179B       |
|  | TMEM18         |
|  | TMEM180        |
|  | TMEM181        |
|  | TMEM183A       |
|  | TMEM183B       |
|  | TMEM184B       |
|  | TMEM184C       |
|  | TMEM185A       |
|  | TMEM185B       |
|  | TMEM186        |
|  | TMEM187        |
|  | TMEM188        |
|  | TMEM189        |
|  | TMEM189-UBE2V1 |
|  | TMEM19         |
|  | TMEM191A       |
|  | TMEM191B       |
|  | TMEM192        |
|  | TMEM194A       |
|  | TMEM198        |
|  | TMEM199        |
|  | TMEM2          |
|  | TMEM20         |
|  | TMEM203        |
|  | TMEM205        |
|  | TMEM206        |
|  | TMEM207        |
|  | TMEM208        |
|  | TMEM209        |
|  | TMEM214        |
|  | TMEM216        |
|  | TMEM217        |
|  | TMEM218        |
|  | TMEM219        |
|  | TMEM222        |
|  | TMEM25         |
|  | TMEM27         |
|  | TMEM30A        |
|  | TMEM30B        |
|  | TMEM33         |
|  | TMEM37         |
|  | TMEM38B        |
|  | TMEM39A        |
|  | TMEM39B        |
|  | TMEM4          |
|  | TMEM41A        |



|  |          |
|--|----------|
|  | TMEM41B  |
|  | TMEM42   |
|  | TMEM43   |
|  | TMEM44   |
|  | TMEM45A  |
|  | TMEM47   |
|  | TMEM48   |
|  | TMEM49   |
|  | TMEM5    |
|  | TMEM50A  |
|  | TMEM50B  |
|  | TMEM51   |
|  | TMEM53   |
|  | TMEM54   |
|  | TMEM55B  |
|  | TMEM56   |
|  | TMEM57   |
|  | TMEM59   |
|  | TMEM60   |
|  | TMEM62   |
|  | TMEM63A  |
|  | TMEM63B  |
|  | TMEM64   |
|  | TMEM66   |
|  | TMEM69   |
|  | TMEM70   |
|  | TMEM77   |
|  | TMEM79   |
|  | TMEM8    |
|  | TMEM80   |
|  | TMEM85   |
|  | TMEM86B  |
|  | TMEM87A  |
|  | TMEM88   |
|  | TMEM9    |
|  | TMEM91   |
|  | TMEM93   |
|  | TMEM97   |
|  | TMEM98   |
|  | TMEM99   |
|  | TMEM9B   |
|  | TMF1     |
|  | TMLHE    |
|  | TMOD1    |
|  | TMOD3    |
|  | TMPO     |
|  | TMPRSS12 |
|  | TMPRSS6  |
|  | TMSB10   |
|  | TMSB4X   |
|  | TMSL3    |
|  | TMTC3    |
|  | TMTC4    |
|  | TMUB1    |
|  | TMUB2    |
|  | TMX1     |

|  |           |
|--|-----------|
|  | TMX3      |
|  | TMX4      |
|  | TNC       |
|  | TNFAIP1   |
|  | TNFAIP3   |
|  | TNFAIP8   |
|  | TNFAIP8L1 |
|  | TNFRSF10B |
|  | TNFRSF10D |
|  | TNFRSF12A |
|  | TNFRSF19  |
|  | TNFRSF1A  |
|  | TNFRSF1B  |
|  | TNFRSF21  |
|  | TNFSF10   |
|  | TNFSF12   |
|  | TNFSF13B  |
|  | TNFSF14   |
|  | TNFSF15   |
|  | TNIP1     |
|  | TNIP2     |
|  | TNK2      |
|  | TNKS1BP1  |
|  | TNPO1     |
|  | TNPO2     |
|  | TNPO3     |
|  | TNRC15    |
|  | TNRC6A    |
|  | TNRC6B    |
|  | TNS1      |
|  | TNS3      |
|  | TOB1      |
|  | TOB2      |
|  | TOE1      |
|  | TOLLIP    |
|  | TOM1      |
|  | TOM1L1    |
|  | TOM1L2    |
|  | TOMM20    |
|  | TOMM22    |
|  | TOMM34    |
|  | TOMM40    |
|  | TOMM40L   |
|  | TOMM5     |
|  | TOMM6     |
|  | TOMM7     |
|  | TOMM70A   |
|  | TOP1      |
|  | TOP1MT    |
|  | TOP1P2    |
|  | TOP2B     |
|  | TOP3A     |
|  | TOP3B     |
|  | TOPBP1    |
|  | TOPORS    |
|  | TOR1A     |

|  |           |
|--|-----------|
|  | TOR1AIP1  |
|  | TOR1AIP2  |
|  | TOR1B     |
|  | TOR3A     |
|  | TOX4      |
|  | TP53      |
|  | TP53AP1   |
|  | TP53BP1   |
|  | TP53BP2   |
|  | TP53I13   |
|  | TP53I3    |
|  | TP53INP1  |
|  | TP53INP2  |
|  | TP53RK    |
|  | TP53TG1   |
|  | TPCN2     |
|  | TPD52     |
|  | TPD52L1   |
|  | TPD52L2   |
|  | TPI1      |
|  | TPK1      |
|  | TPM1      |
|  | TPM2      |
|  | TPM3      |
|  | TPM4      |
|  | TPMT      |
|  | TPP1      |
|  | TPP2      |
|  | TPR       |
|  | TPRG1L    |
|  | TPRKB     |
|  | TPST1     |
|  | TPST2     |
|  | TPT1      |
|  | TRA1P2    |
|  | TRA2A     |
|  | TRABD     |
|  | TRADD     |
|  | TRAF3IP2  |
|  | TRAF4     |
|  | TRAF6     |
|  | TRAF7     |
|  | TRAFD1    |
|  | TRAK1     |
|  | TRAK2     |
|  | TRAM1     |
|  | TRAM2     |
|  | TRAP1     |
|  | TRAPPC1   |
|  | TRAPPC2   |
|  | TRAPPC2L  |
|  | TRAPPC2P1 |
|  | TRAPPC3   |
|  | TRAPPC4   |
|  | TRAPPC5   |
|  | TRAPPC6A  |

|  |          |
|--|----------|
|  | TRAPPC6B |
|  | TRAPPC9  |
|  | TRIAP1   |
|  | TRIB1    |
|  | TRIB3    |
|  | TRIM11   |
|  | TRIM13   |
|  | TRIM2    |
|  | TRIM21   |
|  | TRIM23   |
|  | TRIM24   |
|  | TRIM25   |
|  | TRIM26   |
|  | TRIM27   |
|  | TRIM28   |
|  | TRIM3    |
|  | TRIM32   |
|  | TRIM33   |
|  | TRIM35   |
|  | TRIM37   |
|  | TRIM38   |
|  | TRIM39   |
|  | TRIM4    |
|  | TRIM41   |
|  | TRIM44   |
|  | TRIM45   |
|  | TRIM5    |
|  | TRIM52   |
|  | TRIM55   |
|  | TRIM56   |
|  | TRIM66   |
|  | TRIM68   |
|  | TRIM78P  |
|  | TRIM8    |
|  | TRIM9    |
|  | TRIML1   |
|  | TRIO     |
|  | TRIOBP   |
|  | TRIP10   |
|  | TRIP11   |
|  | TRIP12   |
|  | TRIP4    |
|  | TRIP6    |
|  | TRIT1    |
|  | TRMT1    |
|  | TRMT11   |
|  | TRMT112  |
|  | TRMT12   |
|  | TRMT2A   |
|  | TRMT2B   |
|  | TRMT5    |
|  | TRMT6    |
|  | TRMT61A  |
|  | TRMU     |
|  | TRNAU1AP |
|  | TRNP1    |

|  |         |
|--|---------|
|  | TRNT1   |
|  | TROVE2  |
|  | TRPC4AP |
|  | TRPM4   |
|  | TRPT1   |
|  | TRRAP   |
|  | TRUB2   |
|  | TSC1    |
|  | TSC2    |
|  | TSC22D1 |
|  | TSC22D2 |
|  | TSC22D3 |
|  | TSC22D4 |
|  | TSEN15  |
|  | TSEN2   |
|  | TSEN34  |
|  | TSEN54  |
|  | TSFM    |
|  | TSG101  |
|  | TSGA14  |
|  | TSHZ1   |
|  | TSHZ2   |
|  | TSHZ3   |
|  | TSKU    |
|  | TSNAX   |
|  | TSPAN1  |
|  | TSPAN10 |
|  | TSPAN12 |
|  | TSPAN13 |
|  | TSPAN14 |
|  | TSPAN15 |
|  | TSPAN17 |
|  | TSPAN3  |
|  | TSPAN31 |
|  | TSPAN33 |
|  | TSPAN4  |
|  | TSPAN6  |
|  | TSPAN7  |
|  | TSPAN9  |
|  | TSPO    |
|  | TSPYL1  |
|  | TSPYL2  |
|  | TSPYL4  |
|  | TSPYL6  |
|  | TSR1    |
|  | TSR2    |
|  | TSSC1   |
|  | TSSC4   |
|  | TST     |
|  | TSTA3   |
|  | TSTD1   |
|  | TSTD2   |
|  | TTC1    |
|  | TTC12   |
|  | TTC13   |
|  | TTC14   |

|  |         |
|--|---------|
|  | TTC15   |
|  | TTC17   |
|  | TTC19   |
|  | TTC23   |
|  | TTC27   |
|  | TTC3    |
|  | TTC30A  |
|  | TTC31   |
|  | TTC32   |
|  | TTC33   |
|  | TTC35   |
|  | TTC37   |
|  | TTC38   |
|  | TTC39C  |
|  | TTC4    |
|  | TTC5    |
|  | TTC7B   |
|  | TTC8    |
|  | TTC9C   |
|  | TTF1    |
|  | TTF2    |
|  | TTL     |
|  | TTLL1   |
|  | TTLL12  |
|  | TTLL3   |
|  | TTLL4   |
|  | TTLL5   |
|  | TTPAL   |
|  | TTR     |
|  | TTRAP   |
|  | TTYH3   |
|  | TUBA1A  |
|  | TUBA1B  |
|  | TUBA1C  |
|  | TUBA3D  |
|  | TUBB    |
|  | TUBB2A  |
|  | TUBB2B  |
|  | TUBB2C  |
|  | TUBB3   |
|  | TUBB4Q  |
|  | TUBB6   |
|  | TUBE1   |
|  | TUBG1   |
|  | TUBG2   |
|  | TUBGCP2 |
|  | TUBGCP4 |
|  | TUBGCP5 |
|  | TUBGCP6 |
|  | TUFM    |
|  | TUFT1   |
|  | TUG1    |
|  | TULP3   |
|  | TULP4   |
|  | TUSC1   |
|  | TUSC2   |

|  |           |
|--|-----------|
|  | TUSC4     |
|  | TUT1      |
|  | TWF1      |
|  | TWF2      |
|  | TWISTNB   |
|  | TWSG1     |
|  | TXLNA     |
|  | TXN       |
|  | TXN2      |
|  | TXNDC11   |
|  | TXNDC12   |
|  | TXNDC14   |
|  | TXNDC15   |
|  | TXNDC17   |
|  | TXNDC5    |
|  | TXNDC9    |
|  | TXNIP     |
|  | TXNL1     |
|  | TXNL2     |
|  | TXNRD1    |
|  | TXNRD2    |
|  | TYK2      |
|  | TYMS      |
|  | TYRO3     |
|  | TYSND1    |
|  | TYW1      |
|  | TYW1B     |
|  | TYW3      |
|  | U1SNRNPBP |
|  | U2AF1     |
|  | U2AF1L2   |
|  | U2AF1L4   |
|  | U2AF2     |
|  | UAP1      |
|  | UBA1      |
|  | UBA2      |
|  | UBA3      |
|  | UBA5      |
|  | UBA52     |
|  | UBA6      |
|  | UBA7      |
|  | UBAC1     |
|  | UBAC2     |
|  | UBAP1     |
|  | UBAP2     |
|  | UBAP2L    |
|  | UBB       |
|  | UBC       |
|  | UBD       |
|  | UBE1      |
|  | UBE1C     |
|  | UBE1DC1   |
|  | UBE2A     |
|  | UBE2D2    |
|  | UBE2D3    |
|  | UBE2D4    |

|  |        |
|--|--------|
|  | UBE2E1 |
|  | UBE2E2 |
|  | UBE2E3 |
|  | UBE2F  |
|  | UBE2G1 |
|  | UBE2G2 |
|  | UBE2H  |
|  | UBE2I  |
|  | UBE2J1 |
|  | UBE2J2 |
|  | UBE2K  |
|  | UBE2L3 |
|  | UBE2L6 |
|  | UBE2M  |
|  | UBE2N  |
|  | UBE2O  |
|  | UBE2Q1 |
|  | UBE2Q2 |
|  | UBE2R2 |
|  | UBE2V1 |
|  | UBE2V2 |
|  | UBE2W  |
|  | UBE2Z  |
|  | UBE3A  |
|  | UBE3B  |
|  | UBE3C  |
|  | UBE4A  |
|  | UBE4B  |
|  | UBFD1  |
|  | UBIAD1 |
|  | UBL3   |
|  | UBL4A  |
|  | UBL5   |
|  | UBL7   |
|  | UBLCP1 |
|  | UBN1   |
|  | UBOX5  |
|  | UBP1   |
|  | UBQLN1 |
|  | UBQLN2 |
|  | UBQLN4 |
|  | UBR2   |
|  | UBR3   |
|  | UBR4   |
|  | UBR5   |
|  | UBR7   |
|  | UBTD1  |
|  | UBTD2  |
|  | UBTF   |
|  | UBXN1  |
|  | UBXN11 |
|  | UBXN2A |
|  | UBXN2B |
|  | UBXN4  |
|  | UBXN6  |
|  | UBXN8  |



|  |           |
|--|-----------|
|  | UCHL1     |
|  | UCHL3     |
|  | UCHL5     |
|  | UCHL5IP   |
|  | UCK1      |
|  | UCK2      |
|  | UCKL1     |
|  | UCN       |
|  | UCRC      |
|  | UFC1      |
|  | UFM1      |
|  | UFSP2     |
|  | UGCG      |
|  | UGCGL1    |
|  | UGCGL2    |
|  | UGDH      |
|  | UGP2      |
|  | UGT1A3    |
|  | UGT2B11   |
|  | UGT2B28   |
|  | UGT2B7    |
|  | UHRF1BP1  |
|  | UHRF1BP1L |
|  | UHRF2     |
|  | UIMC1     |
|  | ULK1      |
|  | ULK2      |
|  | ULK3      |
|  | UMPS      |
|  | UNC119    |
|  | UNC119B   |
|  | UNC13B    |
|  | UNC45A    |
|  | UNC50     |
|  | UNC5CL    |
|  | UNC84A    |
|  | UNC84B    |
|  | UNC93A    |
|  | UNC93B1   |
|  | UNG       |
|  | UNKL      |
|  | UPF1      |
|  | UPF2      |
|  | UPF3A     |
|  | UPF3B     |
|  | UPLP      |
|  | UPP1      |
|  | UPRT      |
|  | UQCC      |
|  | UQCR      |
|  | UQCRB     |
|  | UQCRC1    |
|  | UQCRC2    |
|  | UQCRFS1   |
|  | UQCRH     |
|  | UQCRHL    |

|  |        |
|--|--------|
|  | UQCRQ  |
|  | URB1   |
|  | URB2   |
|  | URG4   |
|  | URM1   |
|  | UROD   |
|  | UROS   |
|  | USE1   |
|  | USF1   |
|  | USF2   |
|  | USH1G  |
|  | USO1   |
|  | USP1   |
|  | USP10  |
|  | USP11  |
|  | USP12  |
|  | USP13  |
|  | USP14  |
|  | USP15  |
|  | USP16  |
|  | USP18  |
|  | USP21  |
|  | USP22  |
|  | USP24  |
|  | USP25  |
|  | USP3   |
|  | USP30  |
|  | USP33  |
|  | USP34  |
|  | USP36  |
|  | USP37  |
|  | USP38  |
|  | USP39  |
|  | USP4   |
|  | USP41  |
|  | USP42  |
|  | USP46  |
|  | USP47  |
|  | USP48  |
|  | USP49  |
|  | USP5   |
|  | USP6NL |
|  | USP7   |
|  | USP8   |
|  | USP9X  |
|  | USPL1  |
|  | UTP11L |
|  | UTP14A |
|  | UTP14C |
|  | UTP15  |
|  | UTP18  |
|  | UTP23  |
|  | UTP3   |
|  | UTP6   |
|  | UTRN   |
|  | UTS2   |

|  |          |
|--|----------|
|  | UTX      |
|  | UTY      |
|  | UVRAG    |
|  | UXS1     |
|  | UXT      |
|  | VAC14    |
|  | VAMP1    |
|  | VAMP2    |
|  | VAMP3    |
|  | VAMP4    |
|  | VAMP5    |
|  | VAMP7    |
|  | VAMP8    |
|  | VAPA     |
|  | VARS     |
|  | VARS2    |
|  | VASN     |
|  | VASP     |
|  | VAT1     |
|  | VAV2     |
|  | VBP1     |
|  | VCL      |
|  | VCP      |
|  | VCPIP1   |
|  | VDAC1    |
|  | VDAC3    |
|  | VEGFA    |
|  | VEGFB    |
|  | VENTXP1  |
|  | VEZF1    |
|  | VEZT     |
|  | VGLL4    |
|  | VHL      |
|  | VIL1     |
|  | VIL2     |
|  | VIM      |
|  | VIPR1    |
|  | VISA     |
|  | VKORC1   |
|  | VKORC1L1 |
|  | VMO1     |
|  | VN1R2    |
|  | VPS11    |
|  | VPS13A   |
|  | VPS13D   |
|  | VPS16    |
|  | VPS18    |
|  | VPS24    |
|  | VPS25    |
|  | VPS26    |
|  | VPS26A   |
|  | VPS26B   |
|  | VPS28    |
|  | VPS29    |
|  | VPS33A   |
|  | VPS33B   |

|  |         |
|--|---------|
|  | VPS35   |
|  | VPS36   |
|  | VPS37A  |
|  | VPS37B  |
|  | VPS37C  |
|  | VPS37D  |
|  | VPS39   |
|  | VPS41   |
|  | VPS45   |
|  | VPS4A   |
|  | VPS4B   |
|  | VPS52   |
|  | VPS54   |
|  | VPS72   |
|  | VPS8    |
|  | VRK1    |
|  | VRK2    |
|  | VRK3    |
|  | VTA1    |
|  | VT11B   |
|  | VTN     |
|  | VWA1    |
|  | VWA3A   |
|  | VWA5A   |
|  | VWCE    |
|  | VWF     |
|  | WAC     |
|  | WARS    |
|  | WAS     |
|  | WASF2   |
|  | WASF3   |
|  | WASH1   |
|  | WASH2P  |
|  | WASH5P  |
|  | WASL    |
|  | WBP1    |
|  | WBP11   |
|  | WBP2    |
|  | WBP4    |
|  | WBP5    |
|  | WBSCR16 |
|  | WBSCR22 |
|  | WBSCR27 |
|  | WDFY1   |
|  | WDFY2   |
|  | WDFY3   |
|  | WDR1    |
|  | WDR12   |
|  | WDR13   |
|  | WDR18   |
|  | WDR19   |
|  | WDR20   |
|  | WDR21A  |
|  | WDR22   |
|  | WDR23   |
|  | WDR24   |

|  |        |
|--|--------|
|  | WDR25  |
|  | WDR26  |
|  | WDR33  |
|  | WDR34  |
|  | WDR36  |
|  | WDR37  |
|  | WDR4   |
|  | WDR40A |
|  | WDR41  |
|  | WDR42A |
|  | WDR43  |
|  | WDR44  |
|  | WDR45  |
|  | WDR45L |
|  | WDR46  |
|  | WDR48  |
|  | WDR5   |
|  | WDR51A |
|  | WDR51B |
|  | WDR53  |
|  | WDR54  |
|  | WDR55  |
|  | WDR57  |
|  | WDR59  |
|  | WDR6   |
|  | WDR60  |
|  | WDR61  |
|  | WDR68  |
|  | WDR7   |
|  | WDR70  |
|  | WDR72  |
|  | WDR73  |
|  | WDR74  |
|  | WDR75  |
|  | WDR77  |
|  | WDR79  |
|  | WDR8   |
|  | WDR81  |
|  | WDR82  |
|  | WDR85  |
|  | WDR89  |
|  | WDR90  |
|  | WDR91  |
|  | WDR92  |
|  | WDSOF1 |
|  | WDSUB1 |
|  | WDYHV1 |
|  | WEE1   |
|  | WFS1   |
|  | WHAMM  |
|  | WHSC2  |
|  | WIBG   |
|  | WIP11  |
|  | WIP12  |
|  | WNK1   |
|  | WNK3   |

|  |          |
|--|----------|
|  | WNT5B    |
|  | WRB      |
|  | WRN      |
|  | WRNIP1   |
|  | WSB1     |
|  | WSB2     |
|  | WTAP     |
|  | WWC1     |
|  | WWC2     |
|  | WWC3     |
|  | WWOX     |
|  | WWP1     |
|  | WWP2     |
|  | XAB2     |
|  | XAF1     |
|  | XBP1     |
|  | XCR1     |
|  | XDH      |
|  | XIAP     |
|  | XIST     |
|  | XKR8     |
|  | XPA      |
|  | XPC      |
|  | XPNPEP1  |
|  | XPNPEP2  |
|  | XPNPEP3  |
|  | XPO1     |
|  | XPO4     |
|  | XPO5     |
|  | XPO6     |
|  | XPO7     |
|  | XPR1     |
|  | XRCC1    |
|  | XRCC2    |
|  | XRCC5    |
|  | XRCC6    |
|  | XRCC6BP1 |
|  | XRN1     |
|  | XRN2     |
|  | XYLB     |
|  | XYLT2    |
|  | YAF2     |
|  | YAP1     |
|  | YARS     |
|  | YARS2    |
|  | YBX1     |
|  | YDJC     |
|  | YEATS2   |
|  | YEATS4   |
|  | YES1     |
|  | YIF1A    |
|  | YIF1B    |
|  | YIPF1    |
|  | YIPF2    |
|  | YIPF3    |
|  | YIPF4    |

|  |         |
|--|---------|
|  | YIPF5   |
|  | YIPF6   |
|  | YME1L1  |
|  | YOD1    |
|  | YPEL1   |
|  | YPEL2   |
|  | YPEL3   |
|  | YPEL5   |
|  | YRDC    |
|  | YTHDC1  |
|  | YTHDF1  |
|  | YTHDF2  |
|  | YTHDF3  |
|  | YWHAB   |
|  | YWHAE   |
|  | YWHAG   |
|  | YWHAH   |
|  | YWHAQ   |
|  | YWHAZ   |
|  | YY1     |
|  | YY1AP1  |
|  | ZADH2   |
|  | ZAK     |
|  | ZBED1   |
|  | ZBED3   |
|  | ZBED4   |
|  | ZBED5   |
|  | ZBTB11  |
|  | ZBTB16  |
|  | ZBTB17  |
|  | ZBTB2   |
|  | ZBTB20  |
|  | ZBTB22  |
|  | ZBTB24  |
|  | ZBTB25  |
|  | ZBTB3   |
|  | ZBTB32  |
|  | ZBTB33  |
|  | ZBTB34  |
|  | ZBTB39  |
|  | ZBTB4   |
|  | ZBTB40  |
|  | ZBTB42  |
|  | ZBTB43  |
|  | ZBTB44  |
|  | ZBTB45  |
|  | ZBTB47  |
|  | ZBTB48  |
|  | ZBTB5   |
|  | ZBTB6   |
|  | ZBTB7A  |
|  | ZBTB7B  |
|  | ZBTB8OS |
|  | ZBTB9   |
|  | ZC3H10  |
|  | ZC3H11B |

|  |         |
|--|---------|
|  | ZC3H12A |
|  | ZC3H12B |
|  | ZC3H12C |
|  | ZC3H14  |
|  | ZC3H15  |
|  | ZC3H18  |
|  | ZC3H3   |
|  | ZC3H4   |
|  | ZC3H5   |
|  | ZC3H7A  |
|  | ZC3H8   |
|  | ZC3HAV1 |
|  | ZC3HC1  |
|  | ZC4H2   |
|  | ZCCHC11 |
|  | ZCCHC14 |
|  | ZCCHC17 |
|  | ZCCHC24 |
|  | ZCCHC3  |
|  | ZCCHC6  |
|  | ZCCHC7  |
|  | ZCCHC8  |
|  | ZCCHC9  |
|  | ZCRB1   |
|  | ZCWPW1  |
|  | ZDHHC1  |
|  | ZDHHC11 |
|  | ZDHHC12 |
|  | ZDHHC13 |
|  | ZDHHC14 |
|  | ZDHHC16 |
|  | ZDHHC17 |
|  | ZDHHC18 |
|  | ZDHHC2  |
|  | ZDHHC23 |
|  | ZDHHC24 |
|  | ZDHHC3  |
|  | ZDHHC4  |
|  | ZDHHC5  |
|  | ZDHHC6  |
|  | ZDHHC7  |
|  | ZDHHC8  |
|  | ZDHHC9  |
|  | ZER1    |
|  | ZFAND1  |
|  | ZFAND2A |
|  | ZFAND2B |
|  | ZFAND3  |
|  | ZFAND5  |
|  | ZFAND6  |
|  | ZFC3H1  |
|  | ZFHX3   |
|  | ZFP1    |
|  | ZFP106  |
|  | ZFP161  |
|  | ZFP36   |



|          |
|----------|
| ZFP36L1  |
| ZFP36L2  |
| ZFP90    |
| ZFP91    |
| ZFPL1    |
| ZFPM1    |
| ZFR      |
| ZFX      |
| ZFY      |
| ZFYVE1   |
| ZFYVE16  |
| ZFYVE19  |
| ZFYVE20  |
| ZFYVE21  |
| ZFYVE26  |
| ZFYVE27  |
| ZGPAT    |
| ZHX1     |
| ZHX2     |
| ZHX3     |
| ZIK1     |
| ZKSCAN1  |
| ZKSCAN2  |
| ZKSCAN3  |
| ZKSCAN5  |
| ZMAT2    |
| ZMAT3    |
| ZMAT5    |
| ZMIZ1    |
| ZMIZ2    |
| ZMPSTE24 |
| ZMYM1    |
| ZMYM2    |
| ZMYM3    |
| ZMYM4    |
| ZMYM5    |
| ZMYM6    |
| ZMYND11  |
| ZMYND19  |
| ZMYND8   |
| ZNF10    |
| ZNF114   |
| ZNF12    |
| ZNF131   |
| ZNF133   |
| ZNF134   |
| ZNF136   |
| ZNF14    |
| ZNF140   |
| ZNF142   |
| ZNF143   |
| ZNF146   |
| ZNF148   |
| ZNF155   |
| ZNF16    |
| ZNF160   |

|  |         |
|--|---------|
|  | ZNF165  |
|  | ZNF17   |
|  | ZNF174  |
|  | ZNF177  |
|  | ZNF18   |
|  | ZNF181  |
|  | ZNF187  |
|  | ZNF189  |
|  | ZNF193  |
|  | ZNF195  |
|  | ZNF197  |
|  | ZNF20   |
|  | ZNF200  |
|  | ZNF205  |
|  | ZNF207  |
|  | ZNF212  |
|  | ZNF217  |
|  | ZNF219  |
|  | ZNF22   |
|  | ZNF223  |
|  | ZNF226  |
|  | ZNF227  |
|  | ZNF23   |
|  | ZNF232  |
|  | ZNF239  |
|  | ZNF25   |
|  | ZNF250  |
|  | ZNF252  |
|  | ZNF254  |
|  | ZNF256  |
|  | ZNF259  |
|  | ZNF26   |
|  | ZNF260  |
|  | ZNF263  |
|  | ZNF264  |
|  | ZNF266  |
|  | ZNF268  |
|  | ZNF271  |
|  | ZNF274  |
|  | ZNF275  |
|  | ZNF276  |
|  | ZNF277  |
|  | ZNF280C |
|  | ZNF280D |
|  | ZNF281  |
|  | ZNF282  |
|  | ZNF295  |
|  | ZNF296  |
|  | ZNF3    |
|  | ZNF30   |
|  | ZNF302  |
|  | ZNF304  |
|  | ZNF317  |
|  | ZNF318  |
|  | ZNF319  |
|  | ZNF32   |

|         |
|---------|
| ZNF320  |
| ZNF322A |
| ZNF322B |
| ZNF323  |
| ZNF324  |
| ZNF324B |
| ZNF326  |
| ZNF329  |
| ZNF330  |
| ZNF331  |
| ZNF337  |
| ZNF33A  |
| ZNF33B  |
| ZNF34   |
| ZNF341  |
| ZNF343  |
| ZNF35   |
| ZNF350  |
| ZNF358  |
| ZNF362  |
| ZNF364  |
| ZNF384  |
| ZNF385A |
| ZNF394  |
| ZNF395  |
| ZNF398  |
| ZNF407  |
| ZNF408  |
| ZNF410  |
| ZNF416  |
| ZNF417  |
| ZNF419  |
| ZNF426  |
| ZNF428  |
| ZNF430  |
| ZNF432  |
| ZNF433  |
| ZNF434  |
| ZNF436  |
| ZNF438  |
| ZNF442  |
| ZNF443  |
| ZNF444  |
| ZNF446  |
| ZNF45   |
| ZNF451  |
| ZNF467  |
| ZNF468  |
| ZNF473  |
| ZNF480  |
| ZNF483  |
| ZNF486  |
| ZNF490  |
| ZNF498  |
| ZNF500  |
| ZNF503  |

|         |
|---------|
| ZNF507  |
| ZNF509  |
| ZNF511  |
| ZNF512  |
| ZNF512B |
| ZNF513  |
| ZNF517  |
| ZNF518A |
| ZNF518B |
| ZNF524  |
| ZNF526  |
| ZNF529  |
| ZNF544  |
| ZNF548  |
| ZNF549  |
| ZNF550  |
| ZNF557  |
| ZNF558  |
| ZNF559  |
| ZNF561  |
| ZNF562  |
| ZNF563  |
| ZNF564  |
| ZNF565  |
| ZNF574  |
| ZNF576  |
| ZNF577  |
| ZNF579  |
| ZNF580  |
| ZNF581  |
| ZNF583  |
| ZNF585A |
| ZNF586  |
| ZNF589  |
| ZNF592  |
| ZNF593  |
| ZNF598  |
| ZNF600  |
| ZNF613  |
| ZNF614  |
| ZNF615  |
| ZNF618  |
| ZNF621  |
| ZNF622  |
| ZNF624  |
| ZNF626  |
| ZNF627  |
| ZNF629  |
| ZNF638  |
| ZNF644  |
| ZNF649  |
| ZNF650  |
| ZNF652  |
| ZNF653  |
| ZNF654  |
| ZNF655  |

|  |         |
|--|---------|
|  | ZNF658B |
|  | ZNF668  |
|  | ZNF669  |
|  | ZNF670  |
|  | ZNF671  |
|  | ZNF672  |
|  | ZNF673  |
|  | ZNF674  |
|  | ZNF680  |
|  | ZNF682  |
|  | ZNF684  |
|  | ZNF688  |
|  | ZNF689  |
|  | ZNF69   |
|  | ZNF692  |
|  | ZNF696  |
|  | ZNF697  |
|  | ZNF7    |
|  | ZNF700  |
|  | ZNF706  |
|  | ZNF707  |
|  | ZNF716  |
|  | ZNF717  |
|  | ZNF721  |
|  | ZNF738  |
|  | ZNF74   |
|  | ZNF746  |
|  | ZNF75A  |
|  | ZNF75D  |
|  | ZNF76   |
|  | ZNF763  |
|  | ZNF766  |
|  | ZNF767  |
|  | ZNF768  |
|  | ZNF770  |
|  | ZNF771  |
|  | ZNF773  |
|  | ZNF776  |
|  | ZNF777  |
|  | ZNF783  |
|  | ZNF784  |
|  | ZNF785  |
|  | ZNF786  |
|  | ZNF787  |
|  | ZNF789  |
|  | ZNF791  |
|  | ZNF800  |
|  | ZNF805  |
|  | ZNF815  |
|  | ZNF821  |
|  | ZNF823  |
|  | ZNF828  |
|  | ZNF830  |
|  | ZNF837  |
|  | ZNF839  |
|  | ZNF84   |

|  |           |
|--|-----------|
|  | ZNF841    |
|  | ZNF845    |
|  | ZNF860    |
|  | ZNF91     |
|  | ZNF93     |
|  | ZNFX1     |
|  | ZNHIT1    |
|  | ZNHIT2    |
|  | ZNHIT3    |
|  | ZNHIT6    |
|  | ZNRD1     |
|  | ZP3       |
|  | ZRANB1    |
|  | ZRANB2    |
|  | ZSCAN12L1 |
|  | ZSCAN16   |
|  | ZSCAN18   |
|  | ZSCAN2    |
|  | ZSCAN21   |
|  | ZSCAN5A   |
|  | ZSWIM1    |
|  | ZSWIM4    |
|  | ZSWIM6    |
|  | ZSWIM7    |
|  | ZUFSP     |
|  | ZW10      |
|  | ZWILCH    |
|  | ZXDC      |
|  | ZYG11B    |
|  | ZYX       |
|  | ZZEF1     |
|  | ZZZ3      |

Supplementary Table S3: Gene list of exclusively expressed genes in HLCs.

| Term                                    | %     | PValue   | Genes                                                                                                                                                                                                                                                                                                                                                                                                                                                                                                                                                         |
|-----------------------------------------|-------|----------|---------------------------------------------------------------------------------------------------------------------------------------------------------------------------------------------------------------------------------------------------------------------------------------------------------------------------------------------------------------------------------------------------------------------------------------------------------------------------------------------------------------------------------------------------------------|
| GO:0005911~cell-cell junction           | 1,694 | 9,18E-05 | CLDN18, OCLN, CLDN9, CLDN10, MIP, COL17A1, PVRL1, PPL, WNK4, TGM1, OBSL1, MLLT4, PARD6A, MICALL2, PARD6B, GJB7, MAGI1, LIN7C, MPP7, GJB6, ABCB4, LIN7A, IGSF5, ITGA6, PKP3, DSC1, ABCC2, PDZD3                                                                                                                                                                                                                                                                                                                                                                |
| GO:0043296~apical junction complex      | 1,028 | 5,81E-04 | MICALL2, PARD6A, PARD6B, CLDN18, CLDN9, OCLN, MAGI1, LIN7C, MPP7, CLDN10, LIN7A, IGSF5, WNK4, PKP3, PPL, DSC1, PDZD3                                                                                                                                                                                                                                                                                                                                                                                                                                          |
| GO:0030054~cell junction                | 3,267 | 5,88E-04 | SEPT3, CLDN9, OCLN, GABRB1, FERMT1, SYT6, GABBR2, ZNRF2, WNK4, SV2A, CHRNA3, ANKS1B, MAGI1, MPP7, LIG4, PCLO, IGSF5, RND1, CHRM3, OPHN1, ERC2, IGSF9, CLDN18, CTNND2, CLDN10, MIP, PVRL4, SYNPR, COL17A1, PVRL1, PPL, SYN2, TGM1, OBSL1, MLLT4, GABRP, NPHP1, PARD6A, MICALL2, PARD6B, GJB7, NLGN1, LIN7C, GJB6, HOMER1, ABCB4, LIN7A, PPP1R9A, ITGA6, RAPSN, PKP3, DSC1, ABCC2, PDZD3                                                                                                                                                                        |
| GO:0016327~apicolateral plasma membrane | 1,028 | 8,13E-04 | MICALL2, PARD6A, PARD6B, CLDN18, CLDN9, OCLN, MAGI1, LIN7C, MPP7, CLDN10, LIN7A, IGSF5, WNK4, PKP3, PPL, DSC1, PDZD3                                                                                                                                                                                                                                                                                                                                                                                                                                          |
| GO:0005624~membrane fraction            | 4,537 | 0,00141  | SEPT3, SLC15A1, VAPB, SLC15A2, HIP1R, CYP2S1, PDLIM5, DPP10, HPS1, CNGB1, SLC16A1, SLC23A1, ART5, KCNK9, SLC24A2, SLC1A6, ATP8B1, LMOD1, JPH1, PCDHGA12, STS, CYP1A1, SLC22A7, NROB1, FOLH1, DGAT2, CNTN1, RYR2, ABAT, ERC2, LOC388514, STEAP2, TM4SF4, GCNT3, HSD3B1, OAS3, ARF6, OAS2, ABCA3, MIP, FMO4, IGF1R, SYNPR, PVRL1, FMO1, RASGRP1, BCL2, CYP26B1, TNKS, FUT1, A4GNT, MTMR7, UGT2B28, ACSL5, KLK6, CYP46A1, CYP2C8, LIN7C, MAL, HOMER1, LIN7A, SLC10A1, ABCB4, PPP1R9A, KCNJ8, LASS1, MAP2, ADRA1B, MEP1A, DSC1, DIO1, ABCC2, RDH16, PDZD3, RSC1A1 |
| GO:0070160~occluding junction           | 0,786 | 0,00236  | MICALL2, PARD6A, PARD6B, CLDN18, CLDN9, OCLN, MAGI1, LIN7C, CLDN10, MPP7, LIN7A, IGSF5, WNK4                                                                                                                                                                                                                                                                                                                                                                                                                                                                  |

|                                |       |         |                                                                                                                                                                                                                                                                                                                                                                                                                                                                                                                                                                                                                                                                                       |
|--------------------------------|-------|---------|---------------------------------------------------------------------------------------------------------------------------------------------------------------------------------------------------------------------------------------------------------------------------------------------------------------------------------------------------------------------------------------------------------------------------------------------------------------------------------------------------------------------------------------------------------------------------------------------------------------------------------------------------------------------------------------|
| GO:0005923~tight junction      | 0,786 | 0,00236 | MICALL2, PARD6A, PARD6B, CLDN18, CLDN9, OCLN, MAGI1, LIN7C, CLDN10, MPP7, LIN7A, IGSF5, WNK4                                                                                                                                                                                                                                                                                                                                                                                                                                                                                                                                                                                          |
| GO:0005626~insoluble fraction  | 4,598 | 0,00244 | SEPT3, SLC15A1, VAPB, SLC15A2, HIP1R, CYP2S1, PDLIM5, DPP10, HPS1, CNGB1, SLC16A1, SLC23A1, ART5, KCNK9, SLC24A2, SLC1A6, ATP8B1, SYNJ2, LMOD1, JPH1, PCDHGA12, STS, CYP1A1, SLC22A7, NROB1, FOLH1, DGAT2, CNTN1, RYR2, ABAT, ERC2, LOC388514, STEAP2, TM4SF4, GCNT3, HSD3B1, OAS3, ARF6, OAS2, ABCA3, MIP, FMO4, IGF1R, SYNPR, PVRL1, FMO1, RASGRP1, BCL2, CYP26B1, TNKS, FUT1, A4GNT, MTMR7, UGT2B28, ACSL5, KLK6, CYP46A1, CYP2C8, LIN7C, MAL, HOMER1, LIN7A, SLC10A1, ABCB4, PPP1R9A, KCNJ8, LASS1, MAP2, ADRA1B, MEP1A, DSC1, DIO1, ABCC2, RDH16, PDZD3, RSC1A1                                                                                                                  |
| GO:0000267~cell fraction       | 5,687 | 0,00252 | CGA, SEPT3, CGB, INSL4, SLC15A1, VAPB, SLC15A2, HIP1R, CYP2S1, PDLIM5, DPP10, HPS1, CGB7, CNGB1, SLC16A1, SLC23A1, ART5, KCNK9, STAC, IAPP, SLC24A2, SLC1A6, ATP8B1, SYNJ2, LMOD1, JPH1, PCDHGA12, STS, CYP1A1, SLC22A7, FBP1, NROB1, FOLH1, DGAT2, CNTN1, RYR2, ABAT, ERC2, LOC388514, STEAP2, CRYBA1, TM4SF4, GCNT3, HSD3B1, OAS3, ARF6, OAS2, TRH, ABCA3, TAC3, LOC653269, IL17C, MIP, FMO4, CALCB, IGF1R, SYNPR, PVRL1, FMO1, RASGRP1, BCL2, CYP26B1, HAAO, SRR, TNKS, FUT1, A4GNT, MTMR7, UGT2B28, ACSL5, KLK6, CYP46A1, CYP2C8, LIN7C, MTL5, MAL, IDO1, HOMER1, LIN7A, ABCB4, SLC10A1, PPP1R9A, KCNJ8, LASS1, MAP2, MEP1A, ADRA1B, DSC1, DIO1, ABCC2, RDH16, PDZD3, LHB, RSC1A1 |
| GO:0034702~ion channel complex | 1,512 | 0,00345 | FXVD1, KCNE1L, CLCN2, GABRB1, CACNB2, KCNA5, CNGB1, KCNJ14, KCNJ13, KCNS3, KCNQ4, KCNS1, TTYH2, KCNQ2, CHRNA3, ANO9, GABRP, SCN2B, KCTD1, CACNG1, CLIC3, KCNJ8, CLIC6, RYR2, KCTD14                                                                                                                                                                                                                                                                                                                                                                                                                                                                                                   |
| GO:0042598~vesicular fraction  | 1,694 | 0,00441 | HSD3B1, CYP2S1, OAS3, OAS2, FMO4, MIP, IGF1R, PVRL1, FMO1, BCL2, CYP26B1, TNKS, JPH1, UGT2B28, ACSL5, KLK6, STS, CYP1A1, CYP46A1, CYP2C8, DGAT2, KCNJ8, LASS1, MAP2, LOC388514, DIO1, STEAP2, RDH16                                                                                                                                                                                                                                                                                                                                                                                                                                                                                   |



|                      |       |         |                                                                                                                                                                                             |
|----------------------|-------|---------|---------------------------------------------------------------------------------------------------------------------------------------------------------------------------------------------|
| GO:0005792~microsome | 1,633 | 0,00575 | HSD3B1, CYP2S1, OAS3, OAS2, FMO4, MIP, IGF1R, PVRL1, FMO1, BCL2, CYP26B1, TNKS, JPH1, UGT2B28, ACSL5, KLK6, STS, CYP1A1, CYP46A1, CYP2C8, DGAT2, KCNJ8, LASS1, MAP2, LOC388514, DIO1, RDH16 |
|----------------------|-------|---------|---------------------------------------------------------------------------------------------------------------------------------------------------------------------------------------------|

Supplementary Table S4: Gene lists of the venn diagram Figure 5C.

| fetal_vs_phh_anova | hlc_vs_fetal_anova | fetal_vs_phh_anova<br>AND<br>hlc_vs_fetal_anova | hlc_vs_phh_anova | fetal_vs_phh_anova<br>AND<br>hlc_vs_phh_anova | hlc_vs_fetal_anova<br>AND<br>hlc_vs_phh_anova |
|--------------------|--------------------|-------------------------------------------------|------------------|-----------------------------------------------|-----------------------------------------------|
| ADIPOR1            | A2M                | ABCB10                                          | AASDH            | ABAT                                          | AADAC                                         |
| AEN                | AARS               | ABHD11                                          | ABCB11           | ABCA2                                         | AAK1                                          |
| ANXA11             | ABCB6              | ACAP1                                           | ABCC10           | ABCB1                                         | ABCA8                                         |
| ANXA8L2            | ABHD8              | ACSL4                                           | ABCG8            | ABCC11                                        | ABCC6P2                                       |
| ASAP1IT1           | ABI3               | ACSS1                                           | ABT1             | ABCC2                                         | ABHD12                                        |
| ATF2               | ACAD8              | ACTN4                                           | ACAD9            | ABCC3                                         | ABHD14A                                       |
| ATP7A              | ACBD3              | ADAP2                                           | ACLY             | ABHD1                                         | ABHD14B                                       |
| BCL7C              | ADAMTSL4           | ADORA1                                          | ACO1             | ABLIM1                                        | ACAA1                                         |
| C16orf59           | AEBP2              | AFF3                                            | ACSS2            | ABLIM3                                        | ACADM                                         |
| C16orf87           | AFF4               | AHSP                                            | ACTB             | ABTB2                                         | ACAT2                                         |
| C17orf49           | AMDHD1             | AKTIP                                           | ACYP1            | ACAA2                                         | ACBD7                                         |
| C1orf144           | APOBEC3F           | ALAS2                                           | ACYP2            | ACACA                                         | ACER3                                         |
| C1orf25            | ARFGAP2            | ANK1                                            | ADAMTSL2         | ACACB                                         | ACP1                                          |
| CAND2              | ARID5B             | ANKRD41                                         | ADARB1           | ACAD11                                        | ACPL2                                         |
| CBR4               | ARIH1              | ANXA2P3                                         | ADH5             | ACADVL                                        | ACPP                                          |
| CCNF               | ARS2               | AP2S1                                           | ADHFE1           | ACOT4                                         | ACSM3                                         |
| CKS2               | ASCC1              | APOA2                                           | ADRA2A           | ACOT9                                         | ACTC1                                         |
| CLDN3              | ATE1               | APOBEC2                                         | AEBP1            | ACSL5                                         | ACTN1                                         |
| CNO                | ATP5H              | APOM                                            | AES              | ACSM5                                         | ACVR1                                         |
| COQ6               | ATP5J2             | APP                                             | AGMAT            | ACTR5                                         | ADAM19                                        |
| COTL1              | ATP6V1E1           | ARHGAP15                                        | AGPAT6           | ACY3                                          | ADAM9                                         |
| CREBL2             | AVP                | ARHGAP22                                        | AIDA             | ADAM15                                        | ADAMTS1                                       |
| CSRP2BP            | AZIN1              | ARHGAP30                                        | AKAP1            | ADCY3                                         | ADAMTS19                                      |
| DC36               | B9D1               | ARHGAP9                                         | AKAP10           | ADCYAP1R1                                     | ADAR                                          |
| DENND2C            | BCOR               | ARIH2                                           | AKR1D1           | ADH1B                                         | ADH1A                                         |
| DGKQ               | C12orf10           | ARL4A                                           | ALOXE3           | ADH1C                                         | ADH4                                          |
| DLEU1              | C12orf49           | ARL9                                            | ALS2CR4          | ADI1                                          | ADIPOR2                                       |
| DSTYK              | C14orf166          | ARMCX3                                          | AMD1             | ADK                                           | ADORA2B                                       |
| DYNLT1             | C17orf76           | ASCL2                                           | ANAPC1           | ADPRHL2                                       | AFAP1                                         |
| E2F3               | C17orf96           | ASTE1                                           | ANGEL2           | ADRA1A                                        | AFAP1L2                                       |
| E2F8               | C5orf15            | ATAD1                                           | ANGPTL2          | ADRM1                                         | AGBL5                                         |
| EFCAB4A            | C7orf42            | ATL3                                            | ANKFY1           | ADSL                                          | AGK                                           |
| ENO1               | CCDC120            | ATP1B1                                          | ANKRD13A         | ADSSL1                                        | AGTPBP1                                       |
| FAM104A            | CD38               | ATP1B2                                          | ANKRD16          | AFAR3                                         | AHCYL1                                        |
| FAM164C            | CD74               | ATP5G1                                          | ANKRD17          | AFF1                                          | AHCYL2                                        |
| FANCI              | CEBPD              | ATP6V0A1                                        | ANKRD33          | AFMID                                         | AHSG                                          |
| GATA5              | CIRH1A             | AYP1p1                                          | ANKRD39          | AFP                                           | AIF1L                                         |
| GMPS               | CLDN15             | BACE2                                           | ANKS4B           | AFTPH                                         | AIFM1                                         |
| HERC1              | CNGA1              | BANP                                            | AOF2             | AGPAT4                                        | AIG1                                          |
| HLA-G              | CNN3               | BCAR1                                           | AP1G2            | AGPAT9                                        | AIM1L                                         |
| HMGB1L1            | CTDSP1             | BEND7                                           | AP3M1            | AGXT2L1                                       | AIP                                           |
| HPS4               | CXADR              | BEX1                                            | APOE             | AGXT2L2                                       | AK2P2                                         |
| IL18BP             | CYGB               | BGN                                             | APTX             | AHR                                           | AKR1B1                                        |
| INPP5D             | DAZAP1             | BIK                                             | ARHGAP1          | AKIRIN2                                       | AKT1                                          |
| IRS1               | DENND5A            | BLVRA                                           | ARID2            | AKR1A1                                        | ALB                                           |
| JOSD2              | DGCR2              | BLVRB                                           | ARL16            | AKR1B10                                       | ALDH1A3                                       |
| KCNT2              | DLGAP4             | BMP2                                            | ARL6IP4          | AKR1C2                                        | ALDH3B2                                       |

|              |              |           |           |          |          |
|--------------|--------------|-----------|-----------|----------|----------|
| KIAA0831     | DRD4         | BMP2K     | ARMC1     | AKR1C3   | ALG10    |
| KIF21A       | EIF2B2       | BNIP3L    | ARMC10    | AKR1C4   | ALG10B   |
| LDOC1L       | ELMOD2       | BOLA3     | ARPC1B    | AKR7A3   | ALKBH3   |
| LOC100129685 | F13B         | BPGM      | ARPC3     | ALAS1    | ALX1     |
| LOC100130367 | F2RL1        | BSN       | ARPC5L    | ALDH1B1  | AMBP     |
| LOC100131261 | FAM119B      | BTG2      | ARSA      | ALG14    | AMFR     |
| LOC100131381 | FAM171A1     | BTK       | ARSK      | ALG1L    | AMOT     |
| LOC100132863 | FAM50A       | BZRPL1    | ART5      | ALG2     | AMY1B    |
| LOC100134291 | FIS1         | C10orf33  | ASCC3     | ALG3     | AMZ2     |
| LOC100190986 | FLJ22795     | C10orf35  | ATG16L1   | ALPL     | ANAPC11  |
| LOC143666    | FLJ40113     | C12orf27  | ATG2A     | ALS2CL   | ANGPTL3  |
| LOC282997    | FLJ40504     | C12orf45  | ATG4B     | AMACR    | ANK3     |
| LOC387867    | FOLR3        | C14orf173 | ATN1      | AMHR2    | ANKIB1   |
| LOC642361    | FUK          | C15orf57  | ATP12A    | AMY2A    | ANKLE2   |
| LOC644879    | GADD45GIP1   | C19orf22  | ATP5C1    | AMY2B    | ANKRD10  |
| LOC644931    | GMFB         | C19orf42  | ATP5G3    | ANAPC5   | ANKRD11  |
| LOC650546    | GOLGA5       | C19orf48  | ATP5S     | ANKRD35  | ANKRD38  |
| LOC730740    | GPC3         | C19orf62  | ATP5SL    | ANLN     | ANKRD50  |
| LPAR5        | GSTA2        | C1orf162  | ATP6V1B2  | ANO1     | ANKS1A   |
| LRRC32       | HADHB        | C1orf59   | ATP8B2    | ANXA10   | ANO10    |
| MAD2L1       | HEMGN        | C1QC      | ATRIP     | ANXA2P2  | ANO6     |
| MARK3        | HK3          | C20orf108 | AVEN      | ANXA4    | ANTXR1   |
| MBLAC2       | JUNB         | C20orf175 | B9D2      | ANXA6    | ANXA1    |
| METAP2       | KIAA1545     | C20orf27  | BAG5      | AOX1     | ANXA3    |
| MPHOSPH9     | KLF2         | C22orf25  | BANF1     | AP2B1    | AP1M2    |
| MXD3         | LIPA         | C2orf32   | BAT2L     | AP2M1    | AP3B2    |
| NAP1L4       | LOC100129122 | C3orf10   | BBS2      | AP4E1    | APBB1IP  |
| NEFH         | LOC100133477 | C3orf54   | BCL2L12   | APCS     | APH1A    |
| NOSTRIN      | LOC145853    | C5orf23   | BDNF      | APOC4    | APOA1    |
| ODC1         | LOC283767    | C5orf4    | BEND6     | APOF     | APOC1    |
| OIP5         | LOC284821    | C7orf27   | BLZF1     | APOL2    | APRT     |
| PA2G4        | LOC285733    | C9orf123  | BMPR2     | APOL3    | AQP12A   |
| PASK         | LOC399748    | C9orf30   | BMX       | AQP7P1   | AQR      |
| PCBD2        | LOC440313    | C9orf40   | BPHL      | AQP7P2   | ARCN1    |
| PDXK         | LOC644860    | CALD1     | BRD3      | AQP9     | ARFGEF1  |
| PGAM5        | LOC644934    | CBX3      | BRD7P2    | AR       | ARG2     |
| PGBD3        | LOC645236    | CCDC102A  | BRE       | ARHGAP12 | ARHGAP10 |
| PHLDA2       | LOC645979    | CCDC26    | BSPRY     | ARHGEF3  | ARHGAP18 |
| PLAC9        | LOC648294    | CCDC52    | BTBD10    | ARID1A   | ARHGAP21 |
| PLTP         | LOC650298    | CCL15     | BTG1      | ARL14    | ARHGAP28 |
| PLXNB2       | LOC651697    | CCL23     | BTN3A3    | ARL2     | ARHGAP29 |
| PNO1         | LOC728290    | CCNE2     | C10orf11  | ARL5B    | ARHGAP8  |
| PRMT6        | LOC728823    | CD34      | C10orf32  | ARL8B    | ARHGEF10 |
| ProSAPiP1    | LOC729776    | CD5L      | C10orf88  | ARMC5    | ARHGEF17 |
| PRTFDC1      | LOC730316    | CD97      | C11orf54  | ARMC6    | ARHGEF7  |
| RAD21        | LOC732425    | CDC14B    | C12orf30  | ARMCX6   | ARID3A   |
| RASSF7       | LRRN3        | CDH5      | C12orf62  | ARNTL    | ARID3B   |
| RBBP4        | LRSAM1       | CDKN2D    | C13orf34  | ARP11    | ARL5A    |
| RBPJ         | MAPKAPK5     | CENPM     | C14orf105 | ARRDC4   | ARMC7    |
| RCE1         | MARCH2       | CENTG2    | C14orf133 | ARSD     | ARPC1A   |
| RFNG         | MARCH8       | CFD       | C14orf143 | ASB13    | ARPC2    |
| RGL1         | MAT2B        | CKAP2     | C14orf2   | ASB7     | ARPC5    |
| RHBDF2       | MCOLN1       | CLEC14A   | C15orf63  | ASIP     | ARPP19   |
| RHOQ         | MED8         | CLEC1B    | C16orf68  | ATF3     | ARRDC2   |
| RPA3         | MFSD1        | CLEC4G    | C16orf7   | ATF4     | ASAM     |
| RRP1         | MKRN2        | CLIC2     | C17orf101 | ATF6     | ASAP2    |

|          |          |          |           |           |          |
|----------|----------|----------|-----------|-----------|----------|
| RUSC2    | MRPL1    | CNDP2    | C17orf53  | ATOH8     | ASB3     |
| S100A16  | MRPL24   | CNPY2    | C17orf62  | ATP1B3    | ASNS     |
| SASS6    | MRPL37   | CNPY4    | C17orf79  | ATP5A1    | ATF7IP2  |
| SLBP     | MRPL55   | CNRIP1   | C17orf80  | AURKA     | ATIC     |
| SLC1A1   | MYO18A   | COL9A1   | C17orf85  | AZGP1     | ATP1A1   |
| SLC39A11 | NAT12    | COLEC11  | C17orf89  | BAAT      | ATP2B1   |
| SLMO1    | NBN      | COMMD4   | C19orf10  | BAD       | ATP2B4   |
| SNHG5    | NME3     | COPS3    | C19orf2   | BAG3      | ATP2C1   |
| SP4      | NR1H2    | CPOX     | C19orf50  | BAIAP2    | ATP5E    |
| SPINK1   | NUP88    | CRB1     | C19orf70  | BAIAP2L2  | ATP5EP2  |
| SPTY2D1  | OSGEP    | CRHBP    | C1orf106  | BBOX1     | ATP6AP1  |
| TACC3    | PARP4    | CSNK1D   | C1orf124  | BCKDHB    | ATP6V0A4 |
| TGFB11   | PDE8B    | CTGLF1   | C1orf165  | BCL10     | ATP6V0B  |
| TMEM127  | PDHB     | CTNS     | C1orf24   | BCL11A    | ATP6V1B1 |
| TMEM171  | PDS5A    | CUL4A    | C1orf43   | BCL3      | ATP6V1H  |
| TNFSF4   | PLEKHB2  | CX3CR1   | C1orf55   | BCL7B     | ATP9A    |
| TOR1AIP2 | PMS2L4   | CXCL12   | C1orf85   | BDH2      | ATXN3    |
| TP53I3   | POLB     | CYBB     | C20orf117 | BECN1     | AXIN2    |
| TPI1     | POLR1E   | CYBRD1   | C20orf177 | BEXL1     | AZI1     |
| TRIM39   | POLR3F   | CYP1A1   | C20orf29  | BHMT      | B3GALT4  |
| TRMT5    | PPM1B    | CYP26A1  | C20orf45  | BIRC3     | B4GALT1  |
| TSPAN18  | PPP2CA   | CYP3A7   | C20orf72  | BLOC1S2   | B4GALT4  |
| TSPAN5   | PRKCDBP  | CYTL1    | C21orf119 | BNIP2     | B4GALT6  |
| TTC13    | PRR13    | DCDC2    | C21orf55  | BOAT      | BAI2     |
| TUBA1A   | PRRG1    | DCK      | C21orf70  | BOK       | BAIAP2L1 |
| USP14    | PSG3     | DCN      | C22orf27  | BST2      | BAMBI    |
| VASH1    | PTPN1    | DKC1     | C2orf44   | BTBD12    | BAPX1    |
| WRNIP1   | RBPMS2   | DLK1     | C2orf69   | BTF3      | BARD1    |
| ZHX2     | RHBDF1   | DNAJA3   | C2orf82   | BTRC      | BASP1    |
| ZNF121   | RHOG     | DNAJA4   | C3orf25   | BUB1      | BAT2     |
| ZNF407   | RPS26    | DNAJC3   | C3orf50   | BUB1B     | BAT2D1   |
| ZNF451   | RPS9     | DNASE1L3 | C4A       | BYSL      | BAZ2B    |
| ZNF512   | SAC3D1   | DOCK10   | C4BPB     | C10orf116 | BBS1     |
| ZSWIM5   | SCRIB    | DOCK8    | C4orf18   | C10orf125 | BBS4     |
|          | SEC14L4  | DOLPP1   | C5orf21   | C10orf140 | BBS9     |
|          | SERPINA5 | DPYSL5   | C6orf108  | C10orf4   | BCAP29   |
|          | SERPINF2 | DST      | C6orf153  | C10orf59  | BCAR3    |
|          | SF4      | DUSP9    | C6orf192  | C10orf68  | BCAR4    |
|          | SH3RF1   | DUT      | C6orf221  | C11orf17  | BCAT1    |
|          | SHE      | E2F2     | C6orf62   | C11orf48  | BCL9     |
|          | SLC25A29 | E2F4     | C7orf40   | C12orf31  | BCL9L    |
|          | SLC25A42 | ECM1     | C7orf70   | C12orf34  | BDH1     |
|          | SLC2A9   | EFNA1    | C8orf38   | C12orf44  | BFAR     |
|          | SLC39A3  | EHBP1L1  | C8orf40   | C12orf56  | BICD1    |
|          | SLC45A3  | EIF1AY   | C8orf47   | C13orf3   | BIN1     |
|          | SLC48A1  | EIF4E3   | C9orf119  | C14orf106 | BLOC1S1  |
|          | SLCO1B3  | ELTD1    | C9orf135  | C14orf147 | BMF      |
|          | SNX22    | EMILIN1  | C9orf58   | C14orf149 | BMP6     |
|          | SP2      | ENPP2    | C9orf93   | C14orf167 | BMP7     |
|          | ST3GAL3  | EPB41    | CA12      | C14orf169 | BMPR1A   |
|          | STK11    | EPB42    | CA2       | C15orf52  | BNC1     |
|          | SYS1     | EPOR     | CABC1     | C16orf48  | BNC2     |
|          | THAP11   | ERMAP    | CACNG4    | C16orf91  | BNIPL    |
|          | TIAF1    | ETV4     | CAD       | C17orf68  | BOC      |
|          | TJP3     | ETV5     | CALCOCO2  | C17orf90  | BRD7     |
|          | TNS1     | EZH2     | CAND1     | C17orf91  | BRD8     |

|  |         |          |          |           |           |
|--|---------|----------|----------|-----------|-----------|
|  | TOMM7   | FAM117A  | CAPN6    | C18orf10  | BRP44     |
|  | TOR2A   | FAM124B  | CAPRN2   | C18orf18  | BRP44L    |
|  | TPD52L2 | FAM188A  | CARS2    | C18orf8   | BRSK1     |
|  | TRAM1   | FAM46C   | CASP6    | C19orf12  | BRWD1     |
|  | TSPAN12 | FAM57A   | CATSPER2 | C19orf24  | BTAF1     |
|  | TTY14   | FAM65C   | CCDC107  | C19orf36  | BTBD2     |
|  | UBE2E2  | FAM73B   | CCDC13   | C19orf63  | BTBD3     |
|  | UCP2    | FCER1G   | CCDC132  | C1GALT1C1 | BTG3      |
|  | VEZT    | FCGBP    | CCDC14   | C1orf107  | BZW2      |
|  | WASL    | FCRLB    | CCDC24   | C1orf122  | C10orf118 |
|  | YIPF1   | FECH     | CCDC47   | C1orf149  | C10orf65  |
|  | YTHDF1  | FERMT3   | CCDC49   | C1orf168  | C11orf51  |
|  | ZBED4   | FGL2     | CCDC8    | C1orf212  | C11orf59  |
|  | ZDHHC6  | FGR      | CCDC97   | C1orf51   | C11orf70  |
|  | ZNF277  | FLII     | CCL2     | C1orf63   | C11orf80  |
|  | ZNF524  | FLJ20273 | CCL3L1   | C1R       | C12orf11  |
|  | ZNRD1   | FLJ20489 | CCNA1    | C1RL      | C12orf35  |
|  | ZSCAN16 | FMO1     | CCNG2    | C1S       | C12orf47  |
|  |         | FOXD4L1  | CCNI     | C20orf111 | C12orf52  |
|  |         | FOXO1    | CCPG1    | C20orf24  | C13orf23  |
|  |         | FOXQ1    | CCR7     | C20orf46  | C14orf102 |
|  |         | FPR3     | CCRK     | C20orf55  | C14orf135 |
|  |         | FYB      | CD58     | C20orf7   | C14orf145 |
|  |         | GAB3     | CD83     | C21orf91  | C14orf4   |
|  |         | GAPVD1   | CD99L2   | C22orf29  | C14orf73  |
|  |         | GART     | CDAN1    | C2orf18   | C14orf78  |
|  |         | GATA1    | CDC25C   | C2orf47   | C15orf41  |
|  |         | GFPT1    | CDC40    | C4BPA     | C17orf58  |
|  |         | GFRA2    | CDC42    | C4orf32   | C17orf63  |
|  |         | GIMAP4   | CDC42EP5 | C4orf34   | C17orf69  |
|  |         | GIMAP6   | CDCA2    | C5orf13   | C17orf71  |
|  |         | GIMAP7   | CDH23    | C5orf35   | C18orf26  |
|  |         | GJA4     | CDH6     | C5orf46   | C18orf54  |
|  |         | GLIPR2   | CDX2     | C5orf53   | C19orf43  |
|  |         | GLRX5    | CEACAM1  | C6        | C1orf105  |
|  |         | GMFG     | CENPQ    | C6orf141  | C1orf152  |
|  |         | GMNN     | CEP110   | C6orf142  | C1orf198  |
|  |         | GMPR     | CEP68    | C6orf145  | C1orf53   |
|  |         | GNG11    | CHD8     | C6orf160  | C1orf57   |
|  |         | GPBAR1   | CHN1     | C7orf20   | C1orf74   |
|  |         | GPC1     | CHST14   | C7orf44   | C1orf88   |
|  |         | GPC5     | CLCN3    | C7orf50   | C1orf9    |
|  |         | GPR116   | CLEC16A  | C8G       | C20orf20  |
|  |         | GPR126   | CLIP4    | C9orf150  | C20orf43  |
|  |         | GPR137B  | CLK2     | C9orf3    | C20orf75  |
|  |         | GPR34    | CLUAP1   | C9orf82   | C21orf2   |
|  |         | GPR44    | CLYBL    | C9orf89   | C21orf66  |
|  |         | GPT2     | CMC1     | CABLES1   | C2orf15   |
|  |         | GRAP     | CMTM6    | CACNA1H   | C2orf28   |
|  |         | GSN      | CNKSR3   | CALCA     | C3orf19   |
|  |         | GSTA4    | CNOT1    | CAMK2B    | C3orf59   |
|  |         | GSTM2    | CNTN4    | CAPN5     | C4orf14   |
|  |         | GYPA     | CNTNAP1  | CASC4     | C4orf31   |
|  |         | GYPB     | COL22A1  | CASP7     | C4orf41   |
|  |         | GYPC     | COL6A2   | CASZ1     | C5        |
|  |         | GYPE     | COMMD5   | CAV1      | C5orf33   |

|  |  |           |          |          |           |
|--|--|-----------|----------|----------|-----------|
|  |  | HAL       | COPB1    | CAV2     | C5orf42   |
|  |  | HBA1      | COX15    | CBLC     | C5orf51   |
|  |  | HBA2      | COX7A2   | CBLL1    | C5orf54   |
|  |  | HBB       | CRABP1   | CBR3     | C6orf117  |
|  |  | HBBP1     | CRADD    | CBS      | C6orf204  |
|  |  | HBG1      | CRCP     | CBX4     | C6orf225  |
|  |  | HBG2      | CREB1    | CBX5     | C7orf23   |
|  |  | HBM       | CREBBP   | CCDC106  | C7orf68   |
|  |  | HBQ1      | CRKL     | CCDC21   | C8A       |
|  |  | HBZ       | CROP     | CCDC3    | C8orf4    |
|  |  | HCLS1     | CRTAP    | CCDC50   | C8orf42   |
|  |  | HDDC3     | CRY2     | CCDC88B  | C8orf55   |
|  |  | HDHD2     | CRYZ     | CCDC94   | C8orf58   |
|  |  | HEBP2     | CS       | CCL16    | C9orf140  |
|  |  | HEYL      | CSNK1G1  | CCL20    | C9orf167  |
|  |  | HIST1H2BH | CSNK2A1  | CCNB1    | CA3       |
|  |  | HLA-DMB   | CSNK2A1P | CCNB2    | CA4       |
|  |  | HLA-DPA1  | CSTF3    | CCNE1    | CA5A      |
|  |  | HLA-DRA   | CTDSP2   | CCNL1    | CA5B      |
|  |  | HLA-DRB6  | CTDSPL   | CCNYL1   | CAB39L    |
|  |  | HMBS      | CTNNAL1  | CD40     | CABYR     |
|  |  | HOXA5     | CTNND2   | CD47     | CACHD1    |
|  |  | HOXA6     | CTSF     | CD59     | CACNA2D3  |
|  |  | HPRT1     | CTSH     | CD68     | CACNB3    |
|  |  | HSD11B2   | CTSS     | CDA      | CADM1     |
|  |  | HSPC159   | CTSZ     | CDC2L6   | CALB2     |
|  |  | HTRA2     | CWF19L2  | CDC42EP2 | CALCR     |
|  |  | ICAM4     | CX3CL1   | CDC5L    | CALU      |
|  |  | IDS       | CXCL10   | CDC7     | CAMK1D    |
|  |  | IFNGR1    | CXorf57  | CDCA4    | CAMK2D    |
|  |  | IFT122    | CYP21A2  | CDCA5    | CAMK2G    |
|  |  | IKZF1     | CYP2A6   | CDK9     | CAMK2N1   |
|  |  | IL11RA    | CYP3A43  | CDKN1B   | CAMLG     |
|  |  | IL1RAPL1  | CYR61    | CDKN2B   | CAMSAP1L1 |
|  |  | INF2      | CYTH1    | CDR2     | CANT1     |
|  |  | INS-IGF2  | CYTH2    | CDV3     | CAPNS1    |
|  |  | ITLN1     | D2HGDH   | CECR5    | CARD10    |
|  |  | JAZF1     | DAAM1    | CEP192   | CARM1     |
|  |  | KCNH2     | DAZAP2   | CES1     | CART1     |
|  |  | KCNK6     | DCAKD    | CES2     | CASC3     |
|  |  | KCTD3     | DCTD     | CES4     | CASP1     |
|  |  | KEL       | DDHD2    | CES8     | CASP9     |
|  |  | KIAA1598  | DDRGK1   | CETN3    | CASQ2     |
|  |  | KIAA1737  | DDX1     | CFHR3    | CAT       |
|  |  | KIF13B    | DDX12    | CFHR5    | CBFA2T2   |
|  |  | KIF6      | DDX17    | CFL2     | CBL       |
|  |  | KLF5      | DDX21    | CHAD     | CBLB      |
|  |  | KLHDC8B   | DEF8     | CHCHD10  | CBX1      |
|  |  | KLHL3     | DENND4C  | CHDH     | CBX2      |
|  |  | KLRB1     | DENR     | CHMP1B   | CCBE1     |
|  |  | KRT1      | DEPDC6   | CHMP2A   | CCDC101   |
|  |  | KRT13     | DGCR6    | CHMP4B   | CCDC123   |
|  |  | LAGE3     | DGKA     | CHMP4C   | CCDC136   |
|  |  | LAMA4     | DGUOK    | CHST9    | CCDC151   |
|  |  | LAT       | DHODH    | CHURC1   | CCDC153   |
|  |  | LDB2      | DHRS1    | CIDEC    | CCDC45    |

|  |  |              |         |          |          |
|--|--|--------------|---------|----------|----------|
|  |  | LECT2        | DHRS3   | CITED4   | CCDC56   |
|  |  | LEPR         | DHRS4L2 | CLCF1    | CCDC6    |
|  |  | LILRB2       | DHX37   | CLDN23   | CCDC84   |
|  |  | LILRB5       | DIO3    | CLMN     | CCDC86   |
|  |  | LINGO1       | DIRAS3  | CLP1     | CCKBR    |
|  |  | LIPC         | DLG3    | CMBL     | CCNB1IP1 |
|  |  | LMNB1        | DNAH14  | CNBP     | CCND2    |
|  |  | LMO2         | DNAJB1  | CNDP1    | CCNG1    |
|  |  | LOC100129902 | DNAJC14 | CNPY3    | CCNJL    |
|  |  | LOC100130556 | DNAJC18 | COL27A1  | CCNK     |
|  |  | LOC100130624 | DNAJC27 | COL3A1   | CCS      |
|  |  | LOC100130746 | DNAL1   | COPZ2    | CD163    |
|  |  | LOC100131164 | DNMT3L  | COQ5     | CD24     |
|  |  | LOC100132499 | DOHH    | COX411   | CD320    |
|  |  | LOC100133545 | DOPEY1  | COX5A    | CD9      |
|  |  | LOC100133609 | DPAGT1  | CP       | CD99     |
|  |  | LOC100133678 | DPH2    | CPN2     | CDC14A   |
|  |  | LOC100134424 | DPH3    | CPSF3    | CDC42SE1 |
|  |  | LOC147727    | DPY30   | CREB5    | CDH1     |
|  |  | LOC200030    | DPYSL2  | CRELD2   | CDH10    |
|  |  | LOC387686    | DSCR6   | CRIP1    | CDH24    |
|  |  | LOC388654    | DSE     | CRIP2    | CDH3     |
|  |  | LOC391132    | DSN1    | CRP      | CDK5RAP3 |
|  |  | LOC391769    | DUS4L   | CRY1     | CDK7     |
|  |  | LOC392288    | DUXA    | CRYAA    | CDKN1C   |
|  |  | LOC439949    | DUXAP3  | CRYM     | CDO1     |
|  |  | LOC440570    | DVL2    | CSDA     | CDR2L    |
|  |  | LOC440731    | ECHDC3  | CST3     | CDS1     |
|  |  | LOC441018    | ECM2    | CSTF2    | CDYL     |
|  |  | LOC441081    | EEF1B2  | CTBS     | CELSR2   |
|  |  | LOC641768    | EFNB3   | CTH      | CENPJ    |
|  |  | LOC642073    | EGLN2   | CTSO     | CENTG3   |
|  |  | LOC642113    | EGR1    | CUTC     | CEP55    |
|  |  | LOC642469    | EI24    | CUX2     | CEPT1    |
|  |  | LOC643008    | EIF2AK2 | CWF19L1  | CERCAM   |
|  |  | LOC643431    | EIF2S2  | CXCL6    | CGA      |
|  |  | LOC644852    | EIF3E   | CYB561D2 | CGB1     |
|  |  | LOC644928    | EIF3H   | CYLD     | CHCHD2   |
|  |  | LOC645284    | EIF4B   | CYP1A2   | CHCHD7   |
|  |  | LOC646791    | EIF4E2  | CYP2A7   | CHCHD9   |
|  |  | LOC647579    | EIF6    | CYP2B6   | CHD4     |
|  |  | LOC648399    | ELAVL3  | CYP2C18  | CHES1    |
|  |  | LOC649396    | ELOVL4  | CYP2C19  | CHFR     |
|  |  | LOC651309    | ENPP1   | CYP2C8   | CHM      |
|  |  | LOC651816    | EPHA8   | CYP2C9   | CHMP5    |
|  |  | LOC653907    | EPHB3   | CYP2D6   | CHST12   |
|  |  | LOC729687    | EPHX2   | CYP2D7P1 | CHST13   |
|  |  | LOC729870    | EPRS    | CYP2E1   | CHST15   |
|  |  | LOC730525    | EPS15   | CYP2U1   | CHST3    |
|  |  | LOC731049    | ERBB3   | CYP3A4   | CHSY1    |
|  |  | LOC732165    | ERCC2   | CYP4F11  | CIB2     |
|  |  | LOC732316    | ERO1LB  | CYP4F2   | CISD1    |
|  |  | LOC732419    | ESD     | CYP4F22  | CKAP4    |
|  |  | LRMP         | ETFA    | CYP8B1   | CKB      |
|  |  | LRPAP1       | ETNK2   | CYTA     | CKMT1A   |
|  |  | LRRRC17      | EVC     | CYYR1    | CLCNA    |

|  |  |          |          |               |          |
|--|--|----------|----------|---------------|----------|
|  |  | LST1     | EXOC1    | DAB2          | CLDN1    |
|  |  | LXN      | EXOC5    | DAK           | CLDN10   |
|  |  | LY96     | EXOSC10  | DAO           | CLDN18   |
|  |  | LYL1     | EXOSC5   | DAXX          | CLDN6    |
|  |  | LYVE1    | EXOSC7   | DBNDD1        | CLEC2D   |
|  |  | MAGEA12  | EXTL2    | DBR1          | CLIP3    |
|  |  | MAP3K8   | F10      | DCPS          | CLN8     |
|  |  | MAP7     | FABP5L2  | DCTN6         | CMTM4    |
|  |  | MARCH3   | FADD     | DCUN1D3       | CMTM8    |
|  |  | MARCO    | FAF1     | DCXR          | CNIH4    |
|  |  | MAST3    | FAHD1    | DDIT3         | CNN2     |
|  |  | MED16    | FAHD2B   | DDT           | COBLL1   |
|  |  | MEP1A    | FAM108B1 | DDTL          | COG5     |
|  |  | MFNG     | FAM110A  | DDX19B        | COG6     |
|  |  | MGC13057 | FAM127C  | DDX28         | COL11A1  |
|  |  | MGST3    | FAM162A  | DEFB1         | COL12A1  |
|  |  | MINPP1   | FAM173A  | DEGS1         | COL4A2   |
|  |  | MIR1976  | FAM173B  | DEPDC1B       | COL4A5   |
|  |  | MPP1     | FAM176B  | DEPDC7        | COL4A6   |
|  |  | MPP5     | FAM183A  | DERL1         | COL5A1   |
|  |  | MRPS7    | FAM195A  | DERL2         | COL6A1   |
|  |  | MS4A6A   | FAM20A   | DET1          | COL6A3   |
|  |  | MS4A7    | FAM20B   | DEXI          | COL7A1   |
|  |  | MTFR1    | FAM36A   | DGCR5         | COLEC12  |
|  |  | MUC6     | FAM64A   | DHRS2         | COMMD1   |
|  |  | MUSTN1   | FAM69A   | DHRS9         | COPA     |
|  |  | MXI1     | FAM86A   | DHTKD1        | COPG     |
|  |  | MYB      | FAM8A1   | DHX58         | CORO2A   |
|  |  | MYL4     | FAM96B   | DIAPH3        | COX10    |
|  |  | MYT1     | FANCB    | DIDO1         | COX7B    |
|  |  | MZF1     | FAR1     | DKFZp779M0652 | CPD      |
|  |  | NAPEPLD  | FAR2     | DMRTA1        | CPE      |
|  |  | NBPF14   | FBXL15   | DNAH1         | CPNE3    |
|  |  | NCKAP1L  | FBXO3    | DNAJB4        | CPS1     |
|  |  | NCOA7    | FBXO45   | DNAJC25       | CPSF2    |
|  |  | NDUFA2   | FDX1     | DNPEP         | CPXM2    |
|  |  | NFE2     | FERMT1   | DNTTIP2       | CPZ      |
|  |  | NKD2     | FGL1     | DOCK7         | CRABP2   |
|  |  | NMNAT3   | FHOD3    | DONSON        | CREB3L3  |
|  |  | NOS3     | FIP1L1   | DPM1          | CRH      |
|  |  | NP       | FKBP4    | DPP7          | CRIM1    |
|  |  | NPL      | FLJ10081 | DSCC1         | CRISPLD1 |
|  |  | NR2F1    | FLJ10357 | DUS2L         | CRISPLD2 |
|  |  | NUDT14   | FLJ10374 | DUSP1         | CRMP1    |
|  |  | OAT      | FLJ10661 | DUSP10        | CRSP2    |
|  |  | OLFM1    | FLJ10916 | DUSP16        | CRYZL1   |
|  |  | OSBP     | FLJ11783 | DUSP22        | CSDE1    |
|  |  | OSBP2    | FLJ13305 | DYM           | CSF2RA   |
|  |  | P2RY13   | FLJ20699 | DYNLL2        | CSNK1G3  |
|  |  | P4HA2    | FLJ22531 | DYNLT3        | CSNK2A2  |
|  |  | PAFAH1B3 | FLJ38717 | E2F7          | CSRNP2   |
|  |  | PAK2     | FLJ41484 | EAPP          | CSRP1    |
|  |  | PANK2    | FLJ44124 | EBNA1BP2      | CST1     |
|  |  | PANX2    | FLJ45244 | ECGF1         | CST4     |
|  |  | PCNT     | FLJ46309 | ECHDC1        | CST6     |
|  |  | PECAM1   | FLRT3    | ECHS1         | CTHRC1   |



|  |  |         |         |          |               |
|--|--|---------|---------|----------|---------------|
|  |  | PERP    | FMO4    | ECT2     | CTNNA1        |
|  |  | PIGQ    | FNBP1   | ECT2L    | CTPS2         |
|  |  | PIN1    | FOLH1   | EEPD1    | CTSB          |
|  |  | PKP4    | FOLH1B  | EFEMP2   | CTSL1         |
|  |  | PLAC8   | FOXH1   | EFHD1    | CTSL2         |
|  |  | PLCB2   | FRAG1   | EGFR     | CUL4B         |
|  |  | PLEK    | FRAP1   | EGLN1    | CXCL16        |
|  |  | PLOD3   | FRAT1   | EIF2B5   | CXCR7         |
|  |  | PNMA3   | FREM1   | EIF2S1   | CXorf45       |
|  |  | POLE3   | FSIP1   | EIF5     | CXXC5         |
|  |  | POLS    | FST     | ELAC1    | CYB5D1        |
|  |  | PPAPDC2 | FTHL11  | ELK4     | CYB5R2        |
|  |  | PPM1F   | FTHL2   | ELL      | CYBASC3       |
|  |  | PPOX    | FYN     | ELL3     | CYC1          |
|  |  | PPP2R2B | GALC    | ELOVL5   | CYCS          |
|  |  | PPP3CC  | GALNT10 | ELOVL6   | CYFIP1        |
|  |  | PPP4R1  | GALNT3  | ENDOG    | CYP11A1       |
|  |  | PRDX2   | GATA4   | ENPP7    | CYP1B1        |
|  |  | PRO0628 | GATM    | ENTPD5   | CYP27A1       |
|  |  | PRR14   | GATS    | ENTPD8   | CYP2S1        |
|  |  | PRR15L  | GBE1    | EPB41L2  | CYP4X1        |
|  |  | PRR5    | GCK     | EPB41L4B | D4S234E       |
|  |  | PRRG4   | GCKR    | EPB41L5  | DACT1         |
|  |  | PRSS8   | GCN1L1  | EPHA2    | DAD1L         |
|  |  | PSD     | GDE1    | EPS8     | DAG1          |
|  |  | PTMA    | GDI1    | ERAP2    | DBNDD2        |
|  |  | PTPN11  | GDI2    | ERCC6L   | DCAF10        |
|  |  | PTS     | GDPD1   | ERGIC1   | DCBLD2        |
|  |  | PYGB    | GGT2    | ERLIN2   | DCP1B         |
|  |  | RAB3IL1 | GGTLC1  | ERN1     | DCTN2         |
|  |  | RABGEF1 | GHITM   | ERO1L    | DDAH1         |
|  |  | RAC2    | GINS4   | ESM1     | DDAH2         |
|  |  | RAD23A  | GIT1    | ESPNL    | DDEF2         |
|  |  | RAD51C  | GJC1    | ESRRA    | DDIT4         |
|  |  | RAMP2   | GK      | ESRRAP2  | DDIT4L        |
|  |  | RAPGEF5 | GK5     | ETNK1    | DDR1          |
|  |  | RAPH1   | GLE1    | ETS2     | DDX39         |
|  |  | RASGRP2 | GLG1    | EXOSC6   | DDX42         |
|  |  | RASIP1  | GLRX2   | F8A1     | DDX47         |
|  |  | RBM47   | GLS2    | FAAH     | DDX50         |
|  |  | RBP1    | GLT8D2  | FADS2    | DEAF1         |
|  |  | RBP2    | GMEB1   | FAHD2A   | DENND2D       |
|  |  | RBX1    | GMPR2   | FAIM     | DENND4A       |
|  |  | RCCD1   | GNAS    | FAM100A  | DERA          |
|  |  | RELN    | GNB5    | FAM102A  | DFFA          |
|  |  | RETN    | GOLT1A  | FAM105B  | DFNA5         |
|  |  | RFESD   | GON4L   | FAM107B  | DFNB59        |
|  |  | RFX1    | GPATCH4 | FAM134B  | DHX30         |
|  |  | RGS10   | GPR141  | FAM13A   | DHX40         |
|  |  | RGS18   | GPR146  | FAM160B1 | DHX57         |
|  |  | RHAG    | GPX3    | FAM174A  | DIABLO        |
|  |  | RHCE    | GRHPR   | FAM178A  | DIO2          |
|  |  | RNF123  | GRINA   | FAM35A   | DIP2B         |
|  |  | RNF145  | GRIP2   | FAM86B1  | DIRAS2        |
|  |  | RNF213  | GRN     | FAM91A1  | DIRC2         |
|  |  | RNPEP   | GSG2    | FAM96A   | DKFZP58611420 |

|  |  |              |            |          |               |
|--|--|--------------|------------|----------|---------------|
|  |  | RP5-1022P6.2 | GTF3C5     | FANCA    | DKFZp761P0423 |
|  |  | RPIA         | GTSE1      | FANCD2   | DKK1          |
|  |  | RPL14        | H2AFY2     | FANCG    | DKK3          |
|  |  | RPL36A       | HAUS4      | FAS      | DLD           |
|  |  | RPS26L       | HCCS       | FASTKD5  | DLG2          |
|  |  | RPUSD3       | HCFC1R1    | FBL      | DLG5          |
|  |  | RRAGC        | HCG2P7     | FBLN2    | DLK2          |
|  |  | RSPH3        | HDAC7A     | FBLN7    | DLX3          |
|  |  | RUNDC3A      | HDHD1A     | FBXL3    | DLX5          |
|  |  | S100A10      | HEATR5B    | FBXL6    | DMGDH         |
|  |  | S100A12      | HEBP1      | FBXO25   | DMKN          |
|  |  | S100A8       | HERC4      | FBXO31   | DMTF1         |
|  |  | SAMSN1       | HIAT1      | FBXO46   | DNAH2         |
|  |  | SAPS2        | HIF1AN     | FBXO6    | DNAJB12       |
|  |  | SCGB3A1      | HINFP      | FBXW4    | DNAJB6        |
|  |  | SDPR         | HINT1      | FCAMR    | DNAJC10       |
|  |  | SELL         | HIST1H2BD  | FEM1B    | DNAJC13       |
|  |  | SELM         | HIST2H2AA4 | FEM1C    | DNAL4         |
|  |  | SERPINA13    | HIST2H2AC  | FGF2     | DNMT3B        |
|  |  | SERPINB9     | HIST2H2BE  | FGGY     | DOCK1         |
|  |  | SERPINI1     | HKR1       | FHDC1    | DOCK11        |
|  |  | SETD8        | HLA-C      | FICD     | DPEP1         |
|  |  | SGIP1        | HMGA1      | FIS      | DPM3          |
|  |  | SH2D3C       | HMGB3      | FKBP5    | DPP8          |
|  |  | SH2D4A       | HNRNPD     | FLJ10986 | DPPA3         |
|  |  | SHANK3       | HNRNPF     | FLJ12078 | DPPA4         |
|  |  | SHD          | HNRNPR     | FLJ20581 | DPY19L1       |
|  |  | SLA2         | HNRPH3     | FLJ20674 | DPY19L4       |
|  |  | SLC13A5      | HOXB8      | FLJ38482 | DPYS          |
|  |  | SLC17A2      | HRG        | FLJ42289 | DPYSL3        |
|  |  | SLC1A4       | HS6ST2     | FLVCR2   | DRG2          |
|  |  | SLC22A25     | HSPA1A     | FMO3     | DSC2          |
|  |  | SLC22A4      | HSPBL2     | FNDC4    | DSG2          |
|  |  | SLC25A37     | HTR2B      | FOSB     | DTX3          |
|  |  | SLC25A39     | HUWE1      | FOSL1    | DULLARD       |
|  |  | SLC26A3      | IFI30      | FOSL2    | DUOX1         |
|  |  | SLC2A10      | IHH        | FOXA2    | DYNC1I1       |
|  |  | SLC40A1      | IL13RA1    | FOXD2    | DYNC1I2       |
|  |  | SLC5A11      | IL17RB     | FOXP1    | DYNC1LI2      |
|  |  | SLC6A9       | IL17RC     | FRYL     | DYRK3         |
|  |  | SLC9A9       | IL18R1     | FSTL3    | ECD           |
|  |  | SMC2         | IL8        | FTH1     | EDARADD       |
|  |  | SMC4         | IMP4       | FTSJD2   | EDC3          |
|  |  | SMOX         | INHA       | FVT1     | EDG4          |
|  |  | SNAP25       | INO80C     | G0S2     | EDN1          |
|  |  | SNCA         | IPW        | GABPB2   | EDNRB         |
|  |  | SNHG3-RCC1   | IQCC       | GADD45A  | EEF1A1        |
|  |  | SNORD36C     | IRAK1      | GADD45B  | EFEMP1        |
|  |  | SNRPF        | IRF2BP2    | GAK      | EFNB2         |
|  |  | SNRPN        | IRF5       | GALK2    | EFS           |
|  |  | SOBP         | ISM1       | GAS8     | EIF2B4        |
|  |  | SOX18        | ITCH       | GBP1     | EIF4A2        |
|  |  | SOX6         | ITFG1      | GBP3     | EIF4A3        |
|  |  | SPI1         | ITFG3      | GBP7     | EIF4G3        |
|  |  | SPP1         | ITGB1BP1   | GCC1     | EIF4H         |
|  |  | SPTA1        | ITSN1      | GCLM     | ELAVL1        |

|  |  |            |              |           |          |
|--|--|------------|--------------|-----------|----------|
|  |  | SRRD       | JDP2         | GDF15     | ELMOD1   |
|  |  | ST6GALNAC4 | JTB          | GEM       | EME1     |
|  |  | STAB2      | KCNJ16       | GFOD2     | EMID2    |
|  |  | STAT5B     | KCNJ8        | GFRA1     | ENAH     |
|  |  | STRADB     | KCNS1        | GGNBP2    | ENC1     |
|  |  | SUMF2      | KIAA0363     | GHR       | ENO2     |
|  |  | SYNGR1     | KIAA0556     | GJB2      | ENPEP    |
|  |  | TAL1       | KIAA0907     | GJB3      | ENSA     |
|  |  | TBC1D10A   | KIAA1191     | GLIPR1    | ENTPD4   |
|  |  | TCF20      | KIAA1267     | GLOD5     | EPAS1    |
|  |  | TCF21      | KIAA1285     | GLT25D1   | EPCAM    |
|  |  | TCTEX1D1   | KIAA1328     | GLYATL1   | EPHA1    |
|  |  | TESC       | KIAA1632     | GMPPB     | EPHA4    |
|  |  | TFDP1      | KIDINS220    | GNE       | EPM2AIP1 |
|  |  | TFDP2      | KIF22        | GNMT      | EPN3     |
|  |  | TFRC       | KIF2A        | GOLSYN    | EPST11   |
|  |  | TGM2       | KLF15        | GPD1      | ERC1     |
|  |  | TMCO6      | KLF8         | GPT       | ERCC1    |
|  |  | TMED4      | KLHL2        | GPX2      | ERCC5    |
|  |  | TMED9      | KRCC1        | GPX4      | ESPN     |
|  |  | TMEM14B    | KRT17        | GRB14     | ESRRG    |
|  |  | TMEM14D    | KRTCAP2      | GRIA3     | ETFB     |
|  |  | TMEM167B   | LACTB        | GRPEL1    | EVL      |
|  |  | TMEM170B   | LAMA3        | GSTM4     | EWSR1    |
|  |  | TMEM173    | LANCL2       | GSTP1     | EXD2     |
|  |  | TMEM2      | LASS2        | GSTT2     | EXOC2    |
|  |  | TMEM43     | LASS5        | GSTT2B    | EXOC7    |
|  |  | TMPRSS9    | LBR          | GTPBP4    | EXPH5    |
|  |  | TNFAIP8L3  | LCLAT1       | H2AFX     | EXTL3    |
|  |  | TRAF4      | LCMT2        | H3F3B     | EYA1     |
|  |  | TRIM10     | LCOR         | HACE1     | EZR      |
|  |  | TRIM8      | LDHD         | HAO2      | F12      |
|  |  | TSPAN32    | LGALS3BP     | HAS3      | F2       |
|  |  | TSPAN7     | LGI2         | HBEGF     | F3       |
|  |  | TTC25      | LIME1        | HBP1      | FAM100B  |
|  |  | TTY11      | LIN9         | HCG4      | FAM108C1 |
|  |  | TUBB1      | LMNA         | HCP5      | FAM114A2 |
|  |  | TUBB4Q     | LOC100127988 | HDAC1     | FAM116B  |
|  |  | TXNDC16    | LOC100128326 | HECTD1    | FAM118A  |
|  |  | UBAC1      | LOC100128477 | HECTD3    | FAM119A  |
|  |  | UBXN6      | LOC100128510 | HEPACAM   | FAM120A  |
|  |  | UGCG       | LOC100128688 | HERC2     | FAM120B  |
|  |  | UNC84A     | LOC100128731 | HEXIM1    | FAM123A  |
|  |  | UROS       | LOC100129580 | HGD       | FAM127B  |
|  |  | VCAM1      | LOC100129742 | HIBADH    | FAM129B  |
|  |  | VNN2       | LOC100130229 | HIC2      | FAM149A  |
|  |  | VWA1       | LOC100130557 | HIGD1A    | FAM156A  |
|  |  | VWF        | LOC100130633 | HIP1R     | FAM156B  |
|  |  | WAS        | LOC100130905 | HIST1H2AC | FAM158A  |
|  |  | WDR40A     | LOC100131096 | HIST1H2BC | FAM164A  |
|  |  | WNK4       | LOC100131541 | HIST1H3D  | FAM172A  |
|  |  | XK         | LOC100131810 | HK1       | FAM181B  |
|  |  | XLKD1      | LOC100131835 | HLA-A     | FAM184A  |
|  |  | XPO7       | LOC100131866 | HLA-B     | FAM189B  |
|  |  | YBX1       | LOC100131940 | HLA-E     | FAM195B  |
|  |  | YOD1       | LOC100132323 | HLA-F     | FAM44B   |

|  |  |         |              |          |          |
|--|--|---------|--------------|----------|----------|
|  |  | YPEL2   | LOC100132510 | HLF      | FAM46B   |
|  |  | YPEL4   | LOC100132717 | HLTF     | FAM48A   |
|  |  | ZADH2   | LOC100133077 | HLX      | FAM49A   |
|  |  | ZBTB17  | LOC100133578 | HM13     | FAM60A   |
|  |  | ZDHHC23 | LOC100133972 | HMOX1    | FAM62B   |
|  |  | ZEB2    | LOC100134266 | HNF4A    | FAM65A   |
|  |  | ZFAND3  | LOC134997    | HNRNPH2  | FAM65B   |
|  |  | ZMAT2   | LOC148430    | HNRPUL1  | FAM80B   |
|  |  | ZNF35   | LOC149448    | HNRPUL2  | FAM83B   |
|  |  | ZNF443  | LOC152195    | HOMER2   | FAM84B   |
|  |  | ZNF696  | LOC201175    | HPCAL1   | FAM89A   |
|  |  | ZNF697  | LOC202227    | HPGD     | FANCE    |
|  |  | ZWINT   | LOC203547    | HPS6     | FARP1    |
|  |  |         | LOC255326    | HPSE     | FAT1     |
|  |  |         | LOC283953    | HSD11B1  | FAT3     |
|  |  |         | LOC285016    | HSD17B12 | FBLIM1   |
|  |  |         | LOC285359    | HSD17B13 | FBLN1    |
|  |  |         | LOC285900    | HSD17B6  | FBLN5    |
|  |  |         | LOC286002    | HSD3B7   | FBN2     |
|  |  |         | LOC341315    | HSPB1    | FBN3     |
|  |  |         | LOC341457    | HSPC111  | FBXL10   |
|  |  |         | LOC387723    | HTATIP2  | FBXL14   |
|  |  |         | LOC387841    | HY1      | FBXL2    |
|  |  |         | LOC388076    | ID2      | FBXL21   |
|  |  |         | LOC388524    | IFFO2    | FBXO2    |
|  |  |         | LOC388681    | IFI27    | FBXO21   |
|  |  |         | LOC389072    | IFI44    | FBXO4    |
|  |  |         | LOC390956    | IFIH1    | FBXW8    |
|  |  |         | LOC391833    | IFIT2    | FER1L3   |
|  |  |         | LOC392221    | IFIT3    | FGA      |
|  |  |         | LOC399900    | IFNAR2   | FGD1     |
|  |  |         | LOC400389    | IFT52    | FGD6     |
|  |  |         | LOC400464    | IGDCC4   | FGF11    |
|  |  |         | LOC401357    | IGF1     | FGG      |
|  |  |         | LOC401588    | IGFBP1   | FH       |
|  |  |         | LOC439953    | IGFBP2   | FHL2     |
|  |  |         | LOC440396    | IGSF8    | FHL3     |
|  |  |         | LOC440585    | IK       | FIG4     |
|  |  |         | LOC440589    | IKZF5    | FILIP1   |
|  |  |         | LOC440748    | IL15     | FIT1     |
|  |  |         | LOC440991    | IL15RA   | FKBP14   |
|  |  |         | LOC441114    | IL1R2    | FKBP2    |
|  |  |         | LOC442609    | IL1RL1   | FLJ10996 |
|  |  |         | LOC641765    | IL1RN    | FLJ12684 |
|  |  |         | LOC641825    | IL28RA   | FLJ14712 |
|  |  |         | LOC641844    | IL32     | FLJ16779 |
|  |  |         | LOC642282    | IL5RA    | FLJ22184 |
|  |  |         | LOC642299    | IL6R     | FLJ30428 |
|  |  |         | LOC643031    | IMMP2L   | FLJ31568 |
|  |  |         | LOC643300    | INHBE    | FLJ42957 |
|  |  |         | LOC643433    | INSIG1   | FLJ44342 |
|  |  |         | LOC643438    | INTS12   | FLNA     |
|  |  |         | LOC644033    | INTS9    | FLNB     |
|  |  |         | LOC644101    | IPO11    | FLNC     |
|  |  |         | LOC644919    | IRF1     | FLRT2    |
|  |  |         | LOC644990    | IRF7     | FMNL2    |

|  |  |  |           |          |         |
|--|--|--|-----------|----------|---------|
|  |  |  | LOC645001 | IRS2     | FMO5    |
|  |  |  | LOC645430 | ITGA9    | FMOD    |
|  |  |  | LOC645452 | ITGB4BP  | FN1     |
|  |  |  | LOC645693 | ITGB7    | FNBP1L  |
|  |  |  | LOC645897 | ITPKC    | FNDC3B  |
|  |  |  | LOC645963 | JAK1     | FNTA    |
|  |  |  | LOC646272 | JAM2     | FOLR1   |
|  |  |  | LOC646282 | JMJD6    | FRAS1   |
|  |  |  | LOC646845 | JMJD7    | FRAT2   |
|  |  |  | LOC647009 | JMY      | FREM2   |
|  |  |  | LOC647081 | JOSD1    | FRMD6   |
|  |  |  | LOC647150 | JUB      | FRS3    |
|  |  |  | LOC647276 | JUN      | FRZB    |
|  |  |  | LOC647718 | JUND     | FSTL1   |
|  |  |  | LOC648024 | KCNIP3   | FTHL16  |
|  |  |  | LOC649169 | KCNK5    | FTHL7   |
|  |  |  | LOC649447 | KIAA0232 | FTL     |
|  |  |  | LOC649503 | KIAA0406 | FUCA1   |
|  |  |  | LOC649639 | KIAA0427 | FUCA2   |
|  |  |  | LOC649859 | KIAA0564 | FUT4    |
|  |  |  | LOC649873 | KIAA0586 | FXR1    |
|  |  |  | LOC650128 | KIAA0892 | FZD2    |
|  |  |  | LOC650157 | KIAA1543 | FZD3    |
|  |  |  | LOC650737 | KIAA1671 | FZD4    |
|  |  |  | LOC651198 | KIAA1875 | FZD6    |
|  |  |  | LOC651202 | KIF11    | FZD7    |
|  |  |  | LOC651285 | KIF14    | G6PC3   |
|  |  |  | LOC651987 | KIF3B    | GAB2    |
|  |  |  | LOC652470 | KLF10    | GABRP   |
|  |  |  | LOC652826 | KLF11    | GAD1    |
|  |  |  | LOC652968 | KLF4     | GALNT11 |
|  |  |  | LOC653066 | KLF6     | GALNT6  |
|  |  |  | LOC653073 | KLF9     | GALNTL1 |
|  |  |  | LOC653080 | KLHDC3   | GALT    |
|  |  |  | LOC653383 | KLHL15   | GAPDH   |
|  |  |  | LOC653505 | KLHL21   | GAPDHL6 |
|  |  |  | LOC653752 | KLHL29   | GAR1    |
|  |  |  | LOC654350 | KLHL5    | GARNL4  |
|  |  |  | LOC727820 | KRR1     | GARS    |
|  |  |  | LOC727825 | KTELC1   | GAS6    |
|  |  |  | LOC727901 | KTI12    | GAS7    |
|  |  |  | LOC727984 | KTN1     | GATA2   |
|  |  |  | LOC727987 | LAD1     | GATA3   |
|  |  |  | LOC728069 | LAMB3    | GATAD1  |
|  |  |  | LOC728188 | LAMC3    | GATAD2A |
|  |  |  | LOC728441 | LAMP1    | GC      |
|  |  |  | LOC728452 | LAMP2    | GCDH    |
|  |  |  | LOC728499 | LAP3     | GCGR    |
|  |  |  | LOC728554 | LARP1    | GCM1    |
|  |  |  | LOC728620 | LARP1B   | GCNT1   |
|  |  |  | LOC728635 | LBP      | GDF3    |
|  |  |  | LOC728802 | LDHA     | GFPT2   |
|  |  |  | LOC729009 | LDLR     | GGT1    |
|  |  |  | LOC729301 | LEMD3    | GGTLC2  |
|  |  |  | LOC729340 | LGALS1   | GJA1    |
|  |  |  | LOC729375 | LGALS4   | GLA     |

|  |  |  |           |              |          |
|--|--|--|-----------|--------------|----------|
|  |  |  | LOC729408 | LGALS8       | GLB1     |
|  |  |  | LOC729446 | LGTN         | GLDN     |
|  |  |  | LOC729466 | LIMS1        | GLI3     |
|  |  |  | LOC729535 | LIMS2        | GLMN     |
|  |  |  | LOC729603 | LINCR        | GLRX     |
|  |  |  | LOC729660 | LIPT1        | GLS      |
|  |  |  | LOC730004 | LMO7         | GLTSCR1  |
|  |  |  | LOC730313 | LOC100128191 | GNA12    |
|  |  |  | LOC730908 | LOC100128392 | GNB1     |
|  |  |  | LOC731542 | LOC100128525 | GNL2     |
|  |  |  | LOC88523  | LOC100128585 | GNPAT    |
|  |  |  | LOC91431  | LOC100128888 | GNPDA1   |
|  |  |  | LOC91664  | LOC100129086 | GOLGA3   |
|  |  |  | LPAR1     | LOC100129424 | GPAM     |
|  |  |  | LPCAT2    | LOC100129522 | GPC4     |
|  |  |  | LPIN2     | LOC100129681 | GPN1     |
|  |  |  | LRR2      | LOC100129781 | GPR161   |
|  |  |  | LUC7L     | LOC100130092 | GPR162   |
|  |  |  | LYPLAL1   | LOC100130522 | GPR98    |
|  |  |  | LYSMD1    | LOC100130542 | GPRC5A   |
|  |  |  | M6PR      | LOC100130886 | GPS1     |
|  |  |  | MAF       | LOC100130919 | GPS2     |
|  |  |  | MAGOH     | LOC100132552 | GPSM1    |
|  |  |  | MANEA     | LOC100132553 | GPX8     |
|  |  |  | MAP1LC3B2 | LOC100132655 | GRAMD2   |
|  |  |  | MAP4K2    | LOC100132938 | GRAMD3   |
|  |  |  | MAPK3     | LOC100133511 | GRB7     |
|  |  |  | MARCKS    | LOC100133591 | GRHL2    |
|  |  |  | MAST4     | LOC100133697 | GRHL3    |
|  |  |  | MASTL     | LOC100134108 | GSTA3    |
|  |  |  | MAT1A     | LOC100134144 | GSTO1    |
|  |  |  | MBNL3     | LOC100134407 | GTF2IP1  |
|  |  |  | MDH2      | LOC100134584 | GTF2IRD1 |
|  |  |  | ME1       | LOC143941    | GTF3A    |
|  |  |  | MED12     | LOC145837    | GTF3C1   |
|  |  |  | MED28     | LOC147710    | GTF3C3   |
|  |  |  | MED31     | LOC152217    | GTPBP3   |
|  |  |  | MED7      | LOC158345    | GUCA1A   |
|  |  |  | MEGF9     | LOC197350    | GUCY1A3  |
|  |  |  | MESP1     | LOC221710    | GUCY2C   |
|  |  |  | METR1     | LOC255167    | GUK1     |
|  |  |  | MFAP4     | LOC284988    | GXYLT1   |
|  |  |  | MFF       | LOC286297    | HAND1    |
|  |  |  | MFSD3     | LOC286444    | HAPLN1   |
|  |  |  | MGC26718  | LOC387934    | HARS2    |
|  |  |  | MGC39900  | LOC388503    | HAS1     |
|  |  |  | MGC40489  | LOC388564    | HDAC7    |
|  |  |  | MGC5457   | LOC389141    | HDGFRP3  |
|  |  |  | MGC61598  | LOC389386    | HEATR6   |
|  |  |  | MGC70857  | LOC389672    | HELZ     |
|  |  |  | MLEC      | LOC390251    | HEPH     |
|  |  |  | MLKL      | LOC399491    | HES2     |
|  |  |  | MLLT10    | LOC400578    | HES6     |
|  |  |  | MLLT6     | LOC400721    | HEY1     |
|  |  |  | MLN       | LOC400750    | HHEX     |
|  |  |  | MMP25     | LOC401127    | HINT2    |

|  |  |  |         |           |           |
|--|--|--|---------|-----------|-----------|
|  |  |  | MOCS1   | LOC401317 | HINT3     |
|  |  |  | MOGAT3  | LOC401537 | HIST1H2BK |
|  |  |  | MPDZ    | LOC402560 | HIST1H4K  |
|  |  |  | MPPE1   | LOC440055 | HK2       |
|  |  |  | MRGPRX1 | LOC440345 | HKDC1     |
|  |  |  | MRGPRX4 | LOC440359 | HMGCL     |
|  |  |  | MRPL14  | LOC440498 | HMGCS2    |
|  |  |  | MRPL15  | LOC441013 | HMGN4     |
|  |  |  | MRPL43  | LOC441453 | HNMT      |
|  |  |  | MRPL45  | LOC441896 | HNRNPA1   |
|  |  |  | MRPS11  | LOC641983 | HNRNPA1L2 |
|  |  |  | MRPS12  | LOC642076 | HNRNPU    |
|  |  |  | MRPS18A | LOC642628 | HNRPA1L-2 |
|  |  |  | MRS2    | LOC642755 | HNRPA1P4  |
|  |  |  | MSH6    | LOC643319 | HNRPDL    |
|  |  |  | MSRB2   | LOC643856 | HOMER1    |
|  |  |  | MSRB3   | LOC644132 | HOMER3    |
|  |  |  | MTF2    | LOC644322 | HOPX      |
|  |  |  | MTIF3   | LOC644422 | HOXB4     |
|  |  |  | MTPN    | LOC644914 | HOXB5     |
|  |  |  | MTRR    | LOC645018 | HOXB7     |
|  |  |  | MTX3    | LOC645094 | HOXC6     |
|  |  |  | MUC2    | LOC645381 | HOXC8     |
|  |  |  | MXD1    | LOC645489 | HSBP1     |
|  |  |  | MYL3    | LOC645522 | HSD17B2   |
|  |  |  | MYL6B   | LOC645969 | HSD3B1    |
|  |  |  | MYO9B   | LOC646109 | HSN2      |
|  |  |  | N6AMT1  | LOC646675 | HSP90AA1  |
|  |  |  | NAALAD2 | LOC646743 | HSP90AB1  |
|  |  |  | NAGS    | LOC646981 | HSPA12A   |
|  |  |  | NAT11   | LOC647856 | HSPA4     |
|  |  |  | NBR2    | LOC647859 | HSPB8     |
|  |  |  | NDUFA1  | LOC648249 | HTR1E     |
|  |  |  | NDUFA10 | LOC648517 | HTRA4     |
|  |  |  | NDUFB2  | LOC648682 | HYAL1     |
|  |  |  | NEBL    | LOC649076 | ID1       |
|  |  |  | NEK3    | LOC649495 | IDH3B     |
|  |  |  | NENF    | LOC649497 | IDI1      |
|  |  |  | NEXN    | LOC649553 | IFI27L1   |
|  |  |  | NF1     | LOC650280 | IFI27L2   |
|  |  |  | NFIA    | LOC650803 | IFNAR1    |
|  |  |  | NGDN    | LOC651143 | IFT140    |
|  |  |  | NIF3L1  | LOC652545 | IFT74     |
|  |  |  | NIN     | LOC652773 | IGDCC3    |
|  |  |  | NISCH   | LOC653158 | IGFBP3    |
|  |  |  | NIT2    | LOC653171 | IGFBP5    |
|  |  |  | NKIRAS1 | LOC653199 | IGFBP6    |
|  |  |  | NLGN2   | LOC653342 | IGSF3     |
|  |  |  | NLGN4Y  | LOC653458 | IGSF5     |
|  |  |  | NNMT    | LOC653610 | IL17D     |
|  |  |  | NOL6    | LOC653720 | IL22RA1   |
|  |  |  | NPC1L1  | LOC653879 | IMP3      |
|  |  |  | NR1D2   | LOC654244 | INA       |
|  |  |  | NR2C1   | LOC728014 | INADL     |
|  |  |  | NR2C2   | LOC728034 | INPP1     |
|  |  |  | NR3C2   | LOC728098 | INTS2     |

|  |  |  |          |           |           |
|--|--|--|----------|-----------|-----------|
|  |  |  | NRCAM    | LOC728126 | INTS6     |
|  |  |  | NRD1     | LOC728138 | INTU      |
|  |  |  | NRM      | LOC728139 | INVS      |
|  |  |  | NSDHL    | LOC728160 | IPO8      |
|  |  |  | NSF      | LOC728208 | IQCB1     |
|  |  |  | NSUN4    | LOC728431 | IQGAP1    |
|  |  |  | NT5C2    | LOC728666 | IRX2      |
|  |  |  | NT5DC2   | LOC728811 | IRX4      |
|  |  |  | NTF4     | LOC728855 | ISCU      |
|  |  |  | NUB1     | LOC728908 | ISL1      |
|  |  |  | NUBP1    | LOC729666 | ISM2      |
|  |  |  | NUDT2    | LOC729816 | ISOC1     |
|  |  |  | NUDT7    | LOC729905 | ISYNA1    |
|  |  |  | NUP107   | LOC729970 | ITFG2     |
|  |  |  | NUP133   | LOC730020 | ITGA2     |
|  |  |  | NUP62CL  | LOC730029 | ITGA3     |
|  |  |  | NXF1     | LOC730051 | ITGA5     |
|  |  |  | OCIAD1   | LOC730256 | ITGAL     |
|  |  |  | ODAM     | LOC730324 | ITGB1     |
|  |  |  | OGFOD1   | LOC730417 | ITGB2     |
|  |  |  | OLR1     | LOC730534 | ITGB4     |
|  |  |  | OPRL1    | LOC730820 | ITGB5     |
|  |  |  | ORMDL1   | LOC730993 | ITLN2     |
|  |  |  | OSBPL7   | LOC730994 | ITPR3     |
|  |  |  | OSBPL8   | LOC730995 | IVNS1ABP  |
|  |  |  | OSR1     | LOC731314 | IWS1      |
|  |  |  | OSTalpha | LOC731656 | JARID1A   |
|  |  |  | OTUB2    | LOC731878 | JARID1D   |
|  |  |  | OXR1     | LOC732007 | JPH3      |
|  |  |  | P2RX4    | LONP2     | JUP       |
|  |  |  | PABPC3   | LONRF3    | KCNA6     |
|  |  |  | PAFAH1B2 | LPIN1     | KCNJ2     |
|  |  |  | PAICS    | LPIN3     | KCNK12    |
|  |  |  | PAK1     | LRCH4     | KCNMA1    |
|  |  |  | PAK4     | LRG1      | KCNMB4    |
|  |  |  | PAK6     | LRP5L     | KCTD12    |
|  |  |  | PBK      | LRRC3     | KCTD2     |
|  |  |  | PBX3     | LRRC50    | KDEL2     |
|  |  |  | PCDH10   | LRRC8A    | KDELR1    |
|  |  |  | PCDH17   | LRRC8E    | KDELR2    |
|  |  |  | PCDH18   | LRRCC1    | KDM3B     |
|  |  |  | PCDHA1   | LTBP4     | KDM4D     |
|  |  |  | PCDHGB3  | LYSMD2    | KDM5B     |
|  |  |  | PCGF2    | MAFF      | KHDC1     |
|  |  |  | PCMTD1   | MAK16     | KHDRBS1   |
|  |  |  | PCNP     | MAN2B2    | KIAA0040  |
|  |  |  | PCSK9    | MAOA      | KIAA0174  |
|  |  |  | PCYOX1   | MAP1LC3A  | KIAA0368  |
|  |  |  | PDCD6IP  | MAP1LC3B  | KIAA0672  |
|  |  |  | PDCL3    | MAP2K7    | KIAA0947  |
|  |  |  | PDE5A    | MAP3K4    | KIAA1024  |
|  |  |  | PDGFRL   | MAPRE3    | KIAA1217  |
|  |  |  | PDS5B    | MARCH5    | KIAA1324L |
|  |  |  | PDZD2    | MBIP      | KIAA1429  |
|  |  |  | PDZK1IP1 | MBOAT2    | KIAA1549  |
|  |  |  | PELI1    | MCCC1     | KIAA1688  |



|  |  |  |         |           |           |
|--|--|--|---------|-----------|-----------|
|  |  |  | PELO    | MCL1      | KIAA1967  |
|  |  |  | PES1    | MCM3      | KIF1A     |
|  |  |  | PEX11A  | MEAF6     | KIF26B    |
|  |  |  | PFKFB1  | MED10     | KIF27     |
|  |  |  | PGAP1   | MELK      | KIF3C     |
|  |  |  | PGM1    | MFSD2     | KIF5C     |
|  |  |  | PGM5    | MFSD5     | KIF7      |
|  |  |  | PGPEP1  | MGAT2     | KIFAP3    |
|  |  |  | PGRMC2  | MGAT3     | KITLG     |
|  |  |  | PHB     | MGAT4B    | KLB       |
|  |  |  | PHC2    | MGC102966 | KLC1      |
|  |  |  | PHF10   | MGLL      | KLHDC5    |
|  |  |  | PHF5A   | MGRN1     | KLHL24    |
|  |  |  | PHGDH   | MGST1     | KLHL28    |
|  |  |  | PHLDB1  | MIA3      | KLK6      |
|  |  |  | PI4K2B  | MIF       | KLK8      |
|  |  |  | PIGN    | MIR1974   | KLRG2     |
|  |  |  | PIGP    | MIR1978   | KMO       |
|  |  |  | PIK3AP1 | MKLN1     | KRT17P3   |
|  |  |  | PIK3C3  | MLPH      | KRT18P17  |
|  |  |  | PINX1   | MLXIPL    | KRT18P26  |
|  |  |  | PKIA    | MLYCD     | KRT18P42  |
|  |  |  | PLA2G16 | MMAA      | KRT19     |
|  |  |  | PLAT    | MMP7      | KRT23     |
|  |  |  | PLEKHG6 | MND1      | KRT7      |
|  |  |  | PLOD2   | MNT       | KRT75     |
|  |  |  | PLP2    | MOCOS     | KRT8      |
|  |  |  | PLSCR3  | MORG1     | KRT80     |
|  |  |  | PLXNA2  | MOSC2     | KRT8P9    |
|  |  |  | PMAIP1  | MR1       | KRTAP10-2 |
|  |  |  | PMPCB   | MRLC2     | KRTDAP    |
|  |  |  | PNMAL1  | MRPL34    | KSR1      |
|  |  |  | PNPLA4  | MRPL52    | L1TD1     |
|  |  |  | PNPLA6  | MRPS15    | L3MBTL    |
|  |  |  | POLD1   | MRPS30    | LAMA1     |
|  |  |  | POLD3   | MSH2      | LAMA5     |
|  |  |  | POLDIP2 | MSH5      | LAMB1     |
|  |  |  | POLR2A  | MST1R     | LAMC1     |
|  |  |  | POLR2G  | MTCP1     | LASS6     |
|  |  |  | POLR2J4 | MTMR11    | LATS2     |
|  |  |  | POMC    | MUC20     | LCAT      |
|  |  |  | POMP    | MUPCDH    | LCN15     |
|  |  |  | PON3    | MUTYH     | LCP1      |
|  |  |  | POP4    | MVP       | LDHB      |
|  |  |  | POU2F1  | MX1       | LEAP2     |
|  |  |  | PPA2    | MYD88     | LEF1      |
|  |  |  | PPAN    | MYL12A    | LEMD2     |
|  |  |  | PPAT    | MYL6      | LEPREL1   |
|  |  |  | PPHLN1  | MYLK      | LEPREL2   |
|  |  |  | PPIAL4A | MYO1B     | LEPROTL1  |
|  |  |  | PPIE    | MYOM1     | LHB       |
|  |  |  | PPM1H   | MYRIP     | LHFP      |
|  |  |  | PPP1R3F | N4BP2L1   | LHFPL2    |
|  |  |  | PPP1R7  | NACC2     | LHPP      |
|  |  |  | PPP1R9A | NADK      | LIAS      |
|  |  |  | PPP2R1B | NAGK      | LIFR      |

|  |  |  |           |            |              |
|--|--|--|-----------|------------|--------------|
|  |  |  | PPP2R5A   | NAMPT      | LIG3         |
|  |  |  | PPT1      | NAT2       | LIMA1        |
|  |  |  | PRDX4     | NBAS       | LIMCH1       |
|  |  |  | PRICKLE3  | NBPF20     | LIMK2        |
|  |  |  | PRMT3     | NCAPD3     | LIN28        |
|  |  |  | PRMT5     | NCAPG      | LIN28B       |
|  |  |  | PROSC     | NCRNA00092 | LIX1L        |
|  |  |  | PROZ      | NDN        | LLGL1        |
|  |  |  | PRPF19    | NDUFS2     | LMAN2L       |
|  |  |  | PRPF38A   | NECAP2     | LMCD1        |
|  |  |  | PRTG      | NEDD4      | LMO1         |
|  |  |  | PSD4      | NEFL       | LMTK3        |
|  |  |  | PSMB3     | NEK1       | LOC100008589 |
|  |  |  | PSMD2     | NEK2       | LOC100127993 |
|  |  |  | PSMD6     | NFATC1     | LOC100128168 |
|  |  |  | PSMD7     | NFE2L2     | LOC100128771 |
|  |  |  | PSME2     | NFIC       | LOC100128975 |
|  |  |  | PSMG4     | NFKB1      | LOC100129034 |
|  |  |  | PTGR1     | NFKB2      | LOC100129144 |
|  |  |  | PTMS      | NFKBIB     | LOC100129550 |
|  |  |  | PTP4A1    | NFKBIE     | LOC100129637 |
|  |  |  | PTPDC1    | NFYC       | LOC100129958 |
|  |  |  | PTPLB     | NGFRAP1    | LOC100130921 |
|  |  |  | PTPRA     | NHLRC2     | LOC100131289 |
|  |  |  | PTPRE     | NKX3-1     | LOC100131471 |
|  |  |  | PUF60     | NMT2       | LOC100132526 |
|  |  |  | PUS7L     | NNT        | LOC100132535 |
|  |  |  | PVR       | NOD2       | LOC100132901 |
|  |  |  | RAB10     | NOP14      | LOC100133760 |
|  |  |  | RAB11FIP3 | NOSIP      | LOC100134587 |
|  |  |  | RAB35     | NOTCH2NL   | LOC146517    |
|  |  |  | RAB38     | NOXA1      | LOC151162    |
|  |  |  | RAB5C     | NPAS2      | LOC154761    |
|  |  |  | RAB7L1    | NPIP       | LOC158160    |
|  |  |  | RABGAP1   | NPTX2      | LOC255783    |
|  |  |  | RABL3     | NR1I2      | LOC283267    |
|  |  |  | RAD17     | NR3C1      | LOC283932    |
|  |  |  | RAD51AP1  | NR4A2      | LOC284422    |
|  |  |  | RAD54L    | NRBP2      | LOC284620    |
|  |  |  | RAI14     | NRG1       | LOC286467    |
|  |  |  | RALA      | NRTN       | LOC339535    |
|  |  |  | RALY      | NSFL1C     | LOC344595    |
|  |  |  | RALYL     | NTN4       | LOC346085    |
|  |  |  | RANBP3    | NUDT1      | LOC346887    |
|  |  |  | RAPGEF1   | NUDT16     | LOC388275    |
|  |  |  | RARB      | NUDT18     | LOC389168    |
|  |  |  | RASL11A   | NUDT22     | LOC389332    |
|  |  |  | RASSF5    | NUDT5      | LOC389342    |
|  |  |  | RBBP9     | NUDT9      | LOC391045    |
|  |  |  | RBCK1     | NUF2       | LOC392437    |
|  |  |  | RBM17     | NUFIP2     | LOC392787    |
|  |  |  | RBM5      | NUP98      | LOC392871    |
|  |  |  | REL       | NXT1       | LOC399804    |
|  |  |  | RERG      | OAF        | LOC399965    |
|  |  |  | RFX5      | OASL       | LOC400455    |
|  |  |  | RGS11     | OCEL1      | LOC400713    |

|  |  |  |          |         |           |
|--|--|--|----------|---------|-----------|
|  |  |  | RGS17    | OCIAD2  | LOC401074 |
|  |  |  | RILPL2   | ODF3B   | LOC401115 |
|  |  |  | RNF103   | OGDHL   | LOC401431 |
|  |  |  | RNF13    | OGFR    | LOC401720 |
|  |  |  | RNF170   | OKL38   | LOC402112 |
|  |  |  | RNF4     | OPLAH   | LOC440132 |
|  |  |  | RNF43    | OPN3    | LOC440349 |
|  |  |  | RNFT2    | OPTN    | LOC440905 |
|  |  |  | RNGTT    | OR1S2   | LOC440928 |
|  |  |  | RNH1     | ORM1    | LOC441061 |
|  |  |  | RNPS1    | ORM2    | LOC441131 |
|  |  |  | RNY3     | OSGIN1  | LOC442249 |
|  |  |  | ROM1     | OSGIN2  | LOC554235 |
|  |  |  | RP2      | OTUD1   | LOC55908  |
|  |  |  | RPH3AL   | PALM2   | LOC642412 |
|  |  |  | RPL12    | PAN3    | LOC642489 |
|  |  |  | RPL12P6  | PAOX    | LOC642590 |
|  |  |  | RPL13    | PAPSS2  | LOC643293 |
|  |  |  | RPL13A   | PARK7   | LOC643389 |
|  |  |  | RPL14L   | PARP1   | LOC644128 |
|  |  |  | RPL3     | PARP10  | LOC644150 |
|  |  |  | RPL34    | PARP3   | LOC644237 |
|  |  |  | RPL4     | PARP8   | LOC644612 |
|  |  |  | RPL8     | PCCA    | LOC644761 |
|  |  |  | RPP40    | PCDH20  | LOC645241 |
|  |  |  | RPS6KB1  | PCF11   | LOC645251 |
|  |  |  | RPS6KC1  | PCGF1   | LOC645317 |
|  |  |  | RQCD1    | PCK1    | LOC645431 |
|  |  |  | RSBN1    | PCM1    | LOC646043 |
|  |  |  | RSPO1    | PCSK6   | LOC646123 |
|  |  |  | RTN4IP1  | PDLIM1  | LOC646144 |
|  |  |  | RUFY1    | PDLIM7  | LOC646347 |
|  |  |  | RUNX2    | PDRG1   | LOC646630 |
|  |  |  | RUSC1    | PEAR1   | LOC646769 |
|  |  |  | RUVBL2   | PER2    | LOC646783 |
|  |  |  | RWDD2B   | PEX13   | LOC646786 |
|  |  |  | RYR3     | PGAM1   | LOC646942 |
|  |  |  | S100P    | PGAM4   | LOC647262 |
|  |  |  | S1PR1    | PGK1    | LOC647322 |
|  |  |  | SACS     | PGM3    | LOC647691 |
|  |  |  | SALL1    | PGRMC1  | LOC647949 |
|  |  |  | SALL4    | PHAX    | LOC647954 |
|  |  |  | SAP130   | PHF19   | LOC648390 |
|  |  |  | SBDS     | PHYHD1  | LOC648740 |
|  |  |  | SBSN     | PICK1   | LOC648814 |
|  |  |  | SCARF2   | PID1    | LOC648927 |
|  |  |  | SCGN     | PIGR    | LOC649009 |
|  |  |  | SCMH1    | PIM3    | LOC650369 |
|  |  |  | SDC1     | PIP4K2A | LOC650832 |
|  |  |  | SDCCAG10 | PIPOX   | LOC651659 |
|  |  |  | SDHALP1  | PITPNB  | LOC652097 |
|  |  |  | SDHC     | PKD1    | LOC652577 |
|  |  |  | SDHD     | PKIG    | LOC652900 |
|  |  |  | SEC16A   | PLA2G4C | LOC653188 |
|  |  |  | SEC61G   | PLAGL1  | LOC653269 |
|  |  |  | SELO     | PLEKHF2 | LOC653344 |

|  |  |  |           |          |           |
|--|--|--|-----------|----------|-----------|
|  |  |  | SEMA3C    | PLIN2    | LOC653506 |
|  |  |  | SEMA5B    | PLK4     | LOC654042 |
|  |  |  | SERINC3   | PLLP     | LOC728060 |
|  |  |  | SERPINA10 | PLS1     | LOC728115 |
|  |  |  | SERPINB6  | PMM1     | LOC728226 |
|  |  |  | SERPINE3  | PMM2     | LOC728324 |
|  |  |  | SERPING1  | PMPCA    | LOC728532 |
|  |  |  | SERPINH1  | PNKD     | LOC728533 |
|  |  |  | SESN3     | PNPLA2   | LOC728537 |
|  |  |  | SETDB1    | PNPLA7   | LOC728661 |
|  |  |  | SF3B4     | PNRC1    | LOC728715 |
|  |  |  | SFRS2IP   | POLA1    | LOC728734 |
|  |  |  | SGK2      | POLA2    | LOC728755 |
|  |  |  | SGSM2     | POLD4    | LOC729102 |
|  |  |  | SH2B3     | POLQ     | LOC729222 |
|  |  |  | SH3BP1    | POLR1C   | LOC729279 |
|  |  |  | SH3YL1    | POR      | LOC729317 |
|  |  |  | SHC2      | POU5F1P1 | LOC729366 |
|  |  |  | SHCBP1    | PPA1     | LOC729423 |
|  |  |  | SHISA2    | PPAP2B   | LOC729679 |
|  |  |  | SHPRH     | PPIF     | LOC729686 |
|  |  |  | SIDT2     | PPP1R11  | LOC729760 |
|  |  |  | SIL1      | PPP1R15B | LOC729841 |
|  |  |  | SIRPA     | PPP2CB   | LOC729843 |
|  |  |  | SIRT5     | PPP3CB   | LOC730024 |
|  |  |  | SIVA1     | PPP4R4   | LOC730278 |
|  |  |  | SIX4      | PPPDE2   | LOC731954 |
|  |  |  | SKIV2L2   | PPRC1    | LOC731985 |
|  |  |  | SLC16A10  | PRAMEF17 | LOC91461  |
|  |  |  | SLC16A12  | PRKDC    | LOC91661  |
|  |  |  | SLC17A3   | PRLR     | LOC92249  |
|  |  |  | SLC22A3   | PRMT1    | LOXL1     |
|  |  |  | SLC23A3   | PRNP     | LPAR2     |
|  |  |  | SLC25A10  | PRR8     | LPHN3     |
|  |  |  | SLC25A26  | PRSS3    | LRCH2     |
|  |  |  | SLC25A28  | PSEN2    | LRFN5     |
|  |  |  | SLC27A5   | PSMA2    | LRIG2     |
|  |  |  | SLC29A2   | PSMA7    | LRP2      |
|  |  |  | SLC30A10  | PSMB8    | LRP4      |
|  |  |  | SLC30A9   | PSMB9    | LRRC1     |
|  |  |  | SLC35A2   | PSMC3IP  | LRRC20    |
|  |  |  | SLC35B4   | PSMC6    | LRRC23    |
|  |  |  | SLC41A3   | PSMD5    | LRRC37B   |
|  |  |  | SLC4A8    | PSME1    | LRRC8D    |
|  |  |  | SLC6A4    | PTAR1    | LRRN1     |
|  |  |  | SMA4      | PTH2R    | LRRN2     |
|  |  |  | SMAD6     | PUM2     | LRRN4     |
|  |  |  | SMARCA4   | PUS3     | LSM12     |
|  |  |  | SMYD3     | PZP      | LSM14A    |
|  |  |  | SNCAIP    | QKI      | LSP1      |
|  |  |  | SNORA70B  | R3HDM1   | LTA4H     |
|  |  |  | SNTB1     | RAB17    | LUM       |
|  |  |  | SNX14     | RAB20    | LY6E      |
|  |  |  | SOCS2     | RAB21    | LYPD6     |
|  |  |  | SOCS3     | RAB24    | LYPD6B    |
|  |  |  | SOD3      | RAB40B   | M6PRBP1   |

|  |  |  |          |          |           |
|--|--|--|----------|----------|-----------|
|  |  |  | SP8      | RAB40C   | MAD2L2    |
|  |  |  | SPATA20  | RAB43    | MAFB      |
|  |  |  | SPATA5L1 | RAB8A    | MAGEE1    |
|  |  |  | SPG11    | RAD23B   | MAK10     |
|  |  |  | SPG20    | RAMP1    | MAMDC2    |
|  |  |  | SPG21    | RAN      | MAML1     |
|  |  |  | SPIC     | RANBP10  | MAN1A2    |
|  |  |  | SPRED1   | RANBP3L  | MAN2A2    |
|  |  |  | SPSB3    | RANBP6   | MANBA     |
|  |  |  | SRBD1    | RAPGEF4  | MANBAL    |
|  |  |  | SREBF1   | RARRES2  | MAOB      |
|  |  |  | SRPR     | RARRES3  | MAP1A     |
|  |  |  | SRPRB    | RASD1    | MAP1B     |
|  |  |  | SRRM1    | RASSF4   | MAP2      |
|  |  |  | SSBP3    | RBBP8    | MAP2K1IP1 |
|  |  |  | SSH1     | RBP7     | MAP2K3    |
|  |  |  | SSH2     | RCC2     | MAP3K1    |
|  |  |  | SSTR2    | RCL1     | MAP3K6    |
|  |  |  | SSX4     | RDH14    | MAP3K7    |
|  |  |  | STAT1    | RDH16    | MAP4K4    |
|  |  |  | STAT4    | RELA     | MAPK4     |
|  |  |  | STAT6    | RELB     | MAPK7     |
|  |  |  | STK36    | RET      | MAPKAPK3  |
|  |  |  | STK4     | REXO1    | MAPKBP1   |
|  |  |  | STUB1    | RFC3     | MAPRE1    |
|  |  |  | STXBP6   | RFTN1    | MARCH11   |
|  |  |  | STYK1    | RFXAP    | MARK1     |
|  |  |  | SUCLG2   | RHEB     | MARS      |
|  |  |  | SURF6    | RHOB     | MATN3     |
|  |  |  | SYN2     | RHOD     | MBD2      |
|  |  |  | SYPL2    | RIOK1    | MBNL1     |
|  |  |  | SYT13    | RNASE1   | MBOAT7    |
|  |  |  | SYT17    | RNASEH1  | MBTPS1    |
|  |  |  | SYTL1    | RNASEH2A | MCM3AP    |
|  |  |  | TADA3    | RND1     | MCOLN2    |
|  |  |  | TAF1     | RNF115   | MED15     |
|  |  |  | TAF10    | RNF125   | MED20     |
|  |  |  | TAF5     | RNF130   | MED29     |
|  |  |  | TAF5L    | RNF144B  | MED6      |
|  |  |  | TARBP1   | RNF148   | MEGF6     |
|  |  |  | TAS2R10  | RNF152   | MEIS1     |
|  |  |  | TBC1D15  | ROBLD3   | MEIS2     |
|  |  |  | TBC1D3B  | RORA     | MEIS3P1   |
|  |  |  | TBCC     | RORC     | MERTK     |
|  |  |  | TBCD     | RPA1     | MEST      |
|  |  |  | TCEA1    | RPA2     | METAP1    |
|  |  |  | TCEB3    | RPF1     | METRNL    |
|  |  |  | TCF12    | RPS27L   | METTL2A   |
|  |  |  | TDP1     | RPS3     | MEX3A     |
|  |  |  | TERF1    | RPS3A    | MFAP2     |
|  |  |  | TEX10    | RPS6KA2  | MFAP5     |
|  |  |  | TGFBI    | RRAD     | MFGE8     |
|  |  |  | TGM3     | RRAGA    | MFSD10    |
|  |  |  | THAP10   | RRAGD    | MFSD11    |
|  |  |  | THBS4    | RRAS     | MFSD6L    |
|  |  |  | THEM4    | RRM1     | MGC18216  |

|  |  |  |           |          |          |
|--|--|--|-----------|----------|----------|
|  |  |  | THOC2     | RRN3     | MGC26356 |
|  |  |  | THY1      | RTN4R    | MGC45800 |
|  |  |  | TIGD6     | RTP3     | MID1     |
|  |  |  | TIMM23    | RUNDC1   | MIOS     |
|  |  |  | TIRAP     | RUNDC3B  | MIR1228  |
|  |  |  | TJAP1     | RWDD2A   | MIR205   |
|  |  |  | TLR1      | S100PBP  | MIR21    |
|  |  |  | TM2D1     | SAAL1    | MKKS     |
|  |  |  | TM9SF4    | SAMD4A   | MKL1     |
|  |  |  | TMBIM1    | SAMD5    | MLLT11   |
|  |  |  | TMCO7     | SBDSP    | MMACHC   |
|  |  |  | TMED5     | SC4MOL   | MMD      |
|  |  |  | TMED6     | SCAMP4   | MMGT1    |
|  |  |  | TMEM115   | SCHIP1   | MMP23B   |
|  |  |  | TMEM118   | SCO2     | MMP28    |
|  |  |  | TMEM147   | SCP2     | MMP9     |
|  |  |  | TMEM14A   | SDCBP    | MOBKL2B  |
|  |  |  | TMEM194   | SDCBP2   | MOGS     |
|  |  |  | TMEM200A  | SDF4     | MOSPD2   |
|  |  |  | TMEM205   | SDS      | MOSPD3   |
|  |  |  | TMEM52    | SEC14L2  | MPDU1    |
|  |  |  | TMEM55A   | SEC61B   | MPRIP    |
|  |  |  | TMEM93    | SECISBP2 | MPZL1    |
|  |  |  | TMTC2     | SELS     | MRFAP1L1 |
|  |  |  | TNFRSF10A | SEMA4D   | MRGPRX3  |
|  |  |  | TNFRSF9   | SENP7    | MRPL13   |
|  |  |  | TNFSF14   | SEPHS2   | MRPL21   |
|  |  |  | TNK2      | SEPT4    | MRPL35   |
|  |  |  | TNNC1     | SERINC2  | MRPL46   |
|  |  |  | TOM1      | SERPINB8 | MRPL51   |
|  |  |  | TOPBP1    | SERPINE1 | MRPL54   |
|  |  |  | TP53      | SERTAD1  | MRPS17   |
|  |  |  | TPBG      | SERTAD2  | MRPS28   |
|  |  |  | TPX2      | SESN2    | MSI2     |
|  |  |  | TRAF3IP3  | SETD2    | MST4     |
|  |  |  | TRAPPC1   | SETD6    | MSX2     |
|  |  |  | TRAPPC4   | SF3A2    | MT1A     |
|  |  |  | TRIB2     | SF3A3    | MT1E     |
|  |  |  | TRIB3     | SFRS5    | MT1F     |
|  |  |  | TRIM45    | SFT2D2   | MT1G     |
|  |  |  | TRIM47    | SFTPD    | MT1M     |
|  |  |  | TRIP11    | SGMS2    | MT1X     |
|  |  |  | TRK1      | SGOL1    | MT2A     |
|  |  |  | TSC1      | SGOL2    | MTA1     |
|  |  |  | TSGA14    | SH2D5    | MTA3     |
|  |  |  | TSHZ2     | SH3BP2   | MTAP     |
|  |  |  | TSHZ3     | SH3D19   | MTHFD1L  |
|  |  |  | TSNAX     | SH3GLB2  | MTHFSD   |
|  |  |  | TSPAN33   | SHB      | MTM      |
|  |  |  | TSPAN4    | SHFM1    | MTMR10   |
|  |  |  | TSTA3     | SHMT1    | MTMR7    |
|  |  |  | TTC14     | SHMT2    | MTR      |
|  |  |  | TTC32     | SIGIRR   | MTSS1    |
|  |  |  | TTC38     | SKAP1    | MTUS2    |
|  |  |  | TTF2      | SLC10A1  | MUC15    |
|  |  |  | TTL       | SLC12A4  | MUC16    |

|  |  |  |         |            |            |
|--|--|--|---------|------------|------------|
|  |  |  | TTPAL   | SLC16A2    | MUT        |
|  |  |  | TUBGCP3 | SLC17A4    | MXRA5      |
|  |  |  | TUG1    | SLC20A2    | MXRA7      |
|  |  |  | TXNIP   | SLC22A1    | MYCN       |
|  |  |  | UBA7    | SLC22A18   | MYL7       |
|  |  |  | UBAP2   | SLC22A18AS | MYL9       |
|  |  |  | UBASH3B | SLC24A3    | MYLIP      |
|  |  |  | UBE2Q2  | SLC25A1    | MYO10      |
|  |  |  | UBE4B   | SLC25A22   | MYO5A      |
|  |  |  | UBN2    | SLC25A33   | MYOF       |
|  |  |  | UBXN8   | SLC25A4    | MYOZ1      |
|  |  |  | UCKL1   | SLC25A45   | NAE1       |
|  |  |  | UGT1A9  | SLC25A6    | NALCN      |
|  |  |  | UGT3A1  | SLC28A1    | NAP1L1     |
|  |  |  | UNC45A  | SLC2A6     | NAPB       |
|  |  |  | UQCRFS1 | SLC30A1    | NAT13      |
|  |  |  | USP16   | SLC31A1    | NAT14      |
|  |  |  | USP30   | SLC31A2    | NAV1       |
|  |  |  | USP33   | SLC35C1    | NAV2       |
|  |  |  | USP39   | SLC35D1    | NCK2       |
|  |  |  | VIM     | SLC41A2    | NCOA3      |
|  |  |  | VKORC1  | SLC44A3    | NCOA6      |
|  |  |  | VPS39   | SLC46A1    | NCOR2      |
|  |  |  | VPS41   | SLC46A3    | NCRNA00085 |
|  |  |  | WDR13   | SLC4A4     | NCRNA00219 |
|  |  |  | WDR45   | SLC9A8     | NCSTN      |
|  |  |  | WDR55   | SLPI       | NDRG4      |
|  |  |  | WDR60   | SMARCC2    | NDUFA6     |
|  |  |  | WDR8    | SMPD1      | NDUFA9     |
|  |  |  | WTIP    | SMPDL3A    | NDUFB9     |
|  |  |  | XAF1    | SNAPC4     | NDUFC1     |
|  |  |  | XPA     | SNIP1      | NDUFV2     |
|  |  |  | XPNPEP2 | SNORA64    | NES        |
|  |  |  | XPO5    | SNORA72    | NETO2      |
|  |  |  | ZAK     | SNORA7B    | NEU1       |
|  |  |  | ZBTB9   | SNORD16    | NFAT5      |
|  |  |  | ZC3H12B | SNORD89    | NFE2L3     |
|  |  |  | ZC3H4   | SNRK       | NFIX       |
|  |  |  | ZC3H5   | SNRNP40    | NFX1       |
|  |  |  | ZDHHC19 | SNX10      | NGF        |
|  |  |  | ZDHHC9  | SNX5       | NHS        |
|  |  |  | ZFP90   | SOD2       | NINL       |
|  |  |  | ZHX3    | SORCS2     | NIPA2      |
|  |  |  | ZKSCAN2 | SPAG1      | NKAIN4     |
|  |  |  | ZKSCAN4 | SPAG9      | NKX2-3     |
|  |  |  | ZMYM3   | SPATA2L    | NLGN1      |
|  |  |  | ZNF133  | SPON2      | NLGN4X     |
|  |  |  | ZNF135  | SPR        | NLRP12     |
|  |  |  | ZNF175  | SPRED2     | NLRP7      |
|  |  |  | ZNF193  | SPSB1      | NMNAT2     |
|  |  |  | ZNF197  | SPTBN1     | NOD1       |
|  |  |  | ZNF200  | SPTBN5     | NOTCH3     |
|  |  |  | ZNF232  | SQSTM1     | NPC2       |
|  |  |  | ZNF251  | SRD5A2     | NPEPPS     |
|  |  |  | ZNF252  | SRXN1      | NPPB       |
|  |  |  | ZNF256  | SSH3       | NPTN       |

|  |  |         |          |          |
|--|--|---------|----------|----------|
|  |  | ZNF260  | SSR2     | NPY      |
|  |  | ZNF266  | ST3GAL4  | NQO1     |
|  |  | ZNF285A | STAP2    | NR1H4    |
|  |  | ZNF3    | STARD10  | NR5A2    |
|  |  | ZNF300  | STARD5   | NRAS     |
|  |  | ZNF33A  | STAT3    | NRXN3    |
|  |  | ZNF362  | STIL     | NSMAF    |
|  |  | ZNF420  | STK19    | NSMCE1   |
|  |  | ZNF436  | STK24    | NSUN6    |
|  |  | ZNF490  | STMN1    | NSUN7    |
|  |  | ZNF493  | STX11    | NT5C3    |
|  |  | ZNF500  | STX5     | NTF3     |
|  |  | ZNF519  | SULT2A1  | NTF5     |
|  |  | ZNF521  | SUPV3L1  | NTNG1    |
|  |  | ZNF541  | SURF4    | NTRK2    |
|  |  | ZNF543  | SUSD3    | NUAK1    |
|  |  | ZNF544  | SUSD4    | NUDT11   |
|  |  | ZNF594  | SUZ12    | NUMB     |
|  |  | ZNF598  | SYNCRIP  | NUP35    |
|  |  | ZNF607  | SYPL1    | NUP62    |
|  |  | ZNF613  | SYVN1    | NUP85    |
|  |  | ZNF615  | TACO1    | NXN      |
|  |  | ZNF616  | TAF13    | ODF2L    |
|  |  | ZNF630  | TAOK3    | ODZ3     |
|  |  | ZNF653  | TAP1     | ODZ4     |
|  |  | ZNF658  | TAPBPL   | OFD1     |
|  |  | ZNF700  | TASP1    | OGG1     |
|  |  | ZNF711  | TAT      | OLFML3   |
|  |  | ZNF800  | TBC1D16  | ONECUT2  |
|  |  | ZNF84   | TBC1D8   | OR7E156P |
|  |  | ZNFX1   | TBL1X    | ORMDL3   |
|  |  | ZRSR2   | TBL2     | OSBPL10  |
|  |  | ZSWIM6  | TBX15    | OSBPL3   |
|  |  |         | TCF25    | OSBPL5   |
|  |  |         | TESK1    | OTC      |
|  |  |         | TFG      | OTUB1    |
|  |  |         | TGFA     | OTX2     |
|  |  |         | THOC5    | OVOL1    |
|  |  |         | THRSP    | OVOL2    |
|  |  |         | TIA1     | P2RX2    |
|  |  |         | TICAM1   | P2RY6    |
|  |  |         | TIFA     | P4HA1    |
|  |  |         | TIMELESS | PABPC4L  |
|  |  |         | TIMM22   | PACS2    |
|  |  |         | TIMP3    | PAH      |
|  |  |         | TIPARP   | PALB2    |
|  |  |         | TK1      | PALLD    |
|  |  |         | TK2      | PALMD    |
|  |  |         | TM6SF2   | PAM      |
|  |  |         | TMEM105  | PANK1    |
|  |  |         | TMEM107  | PAPOLA   |
|  |  |         | TMEM134  | PAQR3    |
|  |  |         | TMEM139  | PARD6G   |
|  |  |         | TMEM16A  | PARM1    |
|  |  |         | TMEM185A | PARP11   |
|  |  |         | TMEM185B | PARP6    |



|  |  |  |  |          |         |
|--|--|--|--|----------|---------|
|  |  |  |  | TMEM22   | PBX1    |
|  |  |  |  | TMEM27   | PCCB    |
|  |  |  |  | TMEM37   | PCDH7   |
|  |  |  |  | TMEM45A  | PCDHA3  |
|  |  |  |  | TNFAIP8  | PCDHB17 |
|  |  |  |  | TNIP1    | PCDHB2  |
|  |  |  |  | TNKS1BP1 | PCDHB3  |
|  |  |  |  | TNRC6B   | PCDHB5  |
|  |  |  |  | TOB1     | PCNX    |
|  |  |  |  | TOP2A    | PCNXL2  |
|  |  |  |  | TOR1AIP1 | PCOLCE  |
|  |  |  |  | TP53INP1 | PCP4    |
|  |  |  |  | TP53INP2 | PCSK5   |
|  |  |  |  | TPD52L1  | PCSK7   |
|  |  |  |  | TPRG1L   | PDE4D   |
|  |  |  |  | TPST1    | PDGFRA  |
|  |  |  |  | TRIB1    | PDPN    |
|  |  |  |  | TRIM22   | PDPR    |
|  |  |  |  | TRIM25   | PDXP    |
|  |  |  |  | TRIM31   | PDZK1   |
|  |  |  |  | TRIM35   | PDZRN3  |
|  |  |  |  | TRIO     | PEA15   |
|  |  |  |  | TRIP13   | PECI    |
|  |  |  |  | TROAP    | PEF1    |
|  |  |  |  | TRPM8    | PELI3   |
|  |  |  |  | TSG101   | PEMT    |
|  |  |  |  | TSKU     | PFDN1   |
|  |  |  |  | TSPYL2   | PFKFB4  |
|  |  |  |  | TTC36    | PFN2    |
|  |  |  |  | TTC39C   | PGCP    |
|  |  |  |  | TTC5     | PGF     |
|  |  |  |  | TTK      | PGLS    |
|  |  |  |  | TTLL3    | PGLYRP2 |
|  |  |  |  | TUBA1B   | PGS1    |
|  |  |  |  | TUBA4A   | PHACTR2 |
|  |  |  |  | TUBB     | PHB2    |
|  |  |  |  | TUBB6    | PHC1    |
|  |  |  |  | TUSC1    | PHF16   |
|  |  |  |  | TWF2     | PHF17   |
|  |  |  |  | TXNDC11  | PHF20   |
|  |  |  |  | TXNDC17  | PHLDA3  |
|  |  |  |  | UAP1     | PHPT1   |
|  |  |  |  | UBAP1    | PHYH    |
|  |  |  |  | UBC      | PHYHIPL |
|  |  |  |  | UBD      | PIAS3   |
|  |  |  |  | UBE2J1   | PIBF1   |
|  |  |  |  | UBE2L3   | PIGG    |
|  |  |  |  | UBIAD1   | PIK3C2G |
|  |  |  |  | UBP1     | PITX1   |
|  |  |  |  | UBQLN1   | PITX2   |
|  |  |  |  | UBQLN3   | PKD2    |
|  |  |  |  | UBR2     | PKDCC   |
|  |  |  |  | UBTD1    | PKIB    |
|  |  |  |  | UBXN11   | PKM2    |
|  |  |  |  | UFM1     | PKN1    |
|  |  |  |  | UFSP1    | PKNOX1  |

|  |  |  |  |           |          |
|--|--|--|--|-----------|----------|
|  |  |  |  | UGT1A1    | PLA1A    |
|  |  |  |  | UGT1A10   | PLA2G10  |
|  |  |  |  | UGT1A4    | PLAC2    |
|  |  |  |  | UGT1A6    | PLAU     |
|  |  |  |  | UGT1A7    | PLCB1    |
|  |  |  |  | UGT2B11   | PLCD1    |
|  |  |  |  | UGT2B15   | PLCE1    |
|  |  |  |  | UGT2B17   | PLCXD3   |
|  |  |  |  | UHRF1BP1L | PLD2     |
|  |  |  |  | UMPS      | PLD3     |
|  |  |  |  | UNC84B    | PLD5     |
|  |  |  |  | URB2      | PLEKHA5  |
|  |  |  |  | URG4      | PLEKHA9  |
|  |  |  |  | USP2      | PLEKHG3  |
|  |  |  |  | USP24     | PLSCR4   |
|  |  |  |  | USP34     | PLXDC2   |
|  |  |  |  | USP38     | PMP22    |
|  |  |  |  | USP6NL    | PNCK     |
|  |  |  |  | UST       | PNMA6A   |
|  |  |  |  | UTP3      | PNPO     |
|  |  |  |  | VAPA      | PODXL    |
|  |  |  |  | VASN      | POFUT2   |
|  |  |  |  | VEGFA     | POLE     |
|  |  |  |  | VISA      | POLR2C   |
|  |  |  |  | VNN1      | POLR2J3  |
|  |  |  |  | VRK3      | POMT2    |
|  |  |  |  | WDR21A    | PPARD    |
|  |  |  |  | WDR43     | PPFIA1   |
|  |  |  |  | WDR67     | PPFIBP1  |
|  |  |  |  | WDR7      | PPIL3    |
|  |  |  |  | WDR74     | PPP1CC   |
|  |  |  |  | WTAP      | PPP1R13L |
|  |  |  |  | WWC1      | PPP1R15A |
|  |  |  |  | WWP2      | PPP1R2   |
|  |  |  |  | XDH       | PPP1R3C  |
|  |  |  |  | XRCC3     | PPP2R1A  |
|  |  |  |  | YES1      | PPP2R3B  |
|  |  |  |  | YIPF6     | PPP2R5C  |
|  |  |  |  | YRDC      | PPP2R5E  |
|  |  |  |  | YWHAB     | PQLC1    |
|  |  |  |  | ZBTB16    | PRAGMIN  |
|  |  |  |  | ZBTB2     | PRDM1    |
|  |  |  |  | ZBTB43    | PRDM7    |
|  |  |  |  | ZBTB7B    | PRICKLE1 |
|  |  |  |  | ZC3H12A   | PRKAA1   |
|  |  |  |  | ZC3HAV1   | PRKCH    |
|  |  |  |  | ZCCHC24   | PRKCI    |
|  |  |  |  | ZCCHC6    | PRKCZ    |
|  |  |  |  | ZDHHC1    | PRKD1    |
|  |  |  |  | ZDHHC11   | PRKD2    |
|  |  |  |  | ZFAND2A   | PRMT2    |
|  |  |  |  | ZFAND6    | PRMT7    |
|  |  |  |  | ZFP36     | PROCA1   |
|  |  |  |  | ZGPAT     | PRODH2   |
|  |  |  |  | ZMYND12   | PROM1    |
|  |  |  |  | ZMYND15   | PROM2    |

|  |  |  |        |           |
|--|--|--|--------|-----------|
|  |  |  | ZNF213 | PRPH      |
|  |  |  | ZNF22  | PRPS1     |
|  |  |  | ZNF226 | PRPSAP1   |
|  |  |  | ZNF24  | PRR11     |
|  |  |  | ZNF274 | PRSS12    |
|  |  |  | ZNF295 | PRSS16    |
|  |  |  | ZNF364 | PRSS22    |
|  |  |  | ZNF394 | PRSS23    |
|  |  |  | ZNF593 | PSMB5     |
|  |  |  | ZNF622 | PSME3     |
|  |  |  | ZNF654 | PSPC1     |
|  |  |  | ZNF664 | PSTPIP2   |
|  |  |  | ZNF668 | PTBP1     |
|  |  |  | ZNF746 | PTCD1     |
|  |  |  | ZNF787 | PTDSS2    |
|  |  |  | ZNF788 | PTGES     |
|  |  |  | ZNF828 | PTGIS     |
|  |  |  | ZNHIT2 | PTK7      |
|  |  |  | ZP3    | PTN       |
|  |  |  | ZSWIM1 | PTPLA     |
|  |  |  | ZSWIM3 | PTPN12    |
|  |  |  | ZXDB   | PTPN13    |
|  |  |  |        | PTPN21    |
|  |  |  |        | PTTG1IP   |
|  |  |  |        | PUM1      |
|  |  |  |        | PVRL4     |
|  |  |  |        | PXN       |
|  |  |  |        | PYCARD    |
|  |  |  |        | PYCR1     |
|  |  |  |        | PYGL      |
|  |  |  |        | QSOX1     |
|  |  |  |        | RAB11A    |
|  |  |  |        | RAB11FIP4 |
|  |  |  |        | RAB15     |
|  |  |  |        | RAB25     |
|  |  |  |        | RAB34     |
|  |  |  |        | RAB3GAP1  |
|  |  |  |        | RAB3GAP2  |
|  |  |  |        | RAB3IP    |
|  |  |  |        | RAD54B    |
|  |  |  |        | RADIL     |
|  |  |  |        | RALGAPB   |
|  |  |  |        | RALGPS1   |
|  |  |  |        | RALGPS2   |
|  |  |  |        | RAP2C     |
|  |  |  |        | RASA1     |
|  |  |  |        | RASGRP1   |
|  |  |  |        | RASGRP3   |
|  |  |  |        | RASL11B   |
|  |  |  |        | RBM12     |
|  |  |  |        | RBM15B    |
|  |  |  |        | RBM25     |
|  |  |  |        | RBM28     |
|  |  |  |        | RBM35A    |
|  |  |  |        | RBM9      |
|  |  |  |        | RBMS1     |

|  |  |  |  |  |         |
|--|--|--|--|--|---------|
|  |  |  |  |  | RBMS2   |
|  |  |  |  |  | RBMS2P  |
|  |  |  |  |  | RBMX    |
|  |  |  |  |  | RBP5    |
|  |  |  |  |  | RCAN2   |
|  |  |  |  |  | RCN1    |
|  |  |  |  |  | RCOR2   |
|  |  |  |  |  | RDH10   |
|  |  |  |  |  | REEP1   |
|  |  |  |  |  | RERE    |
|  |  |  |  |  | RFWD2   |
|  |  |  |  |  | RFX7    |
|  |  |  |  |  | RGS4    |
|  |  |  |  |  | RHOBTB1 |
|  |  |  |  |  | RHOBTB2 |
|  |  |  |  |  | RHOBTB3 |
|  |  |  |  |  | RICH2   |
|  |  |  |  |  | RICS    |
|  |  |  |  |  | RILPL1  |
|  |  |  |  |  | RIMKLB  |
|  |  |  |  |  | RIMS2   |
|  |  |  |  |  | RIN2    |
|  |  |  |  |  | RIOK3   |
|  |  |  |  |  | RIT1    |
|  |  |  |  |  | RNASEN  |
|  |  |  |  |  | RNF128  |
|  |  |  |  |  | RNF38   |
|  |  |  |  |  | RNF44   |
|  |  |  |  |  | RNF5P1  |
|  |  |  |  |  | RNU105A |
|  |  |  |  |  | ROD1    |
|  |  |  |  |  | ROR1    |
|  |  |  |  |  | ROR2    |
|  |  |  |  |  | RPAP1   |
|  |  |  |  |  | RPESP   |
|  |  |  |  |  | RPL32   |
|  |  |  |  |  | RPL37   |
|  |  |  |  |  | RPL39L  |
|  |  |  |  |  | RPLP0   |
|  |  |  |  |  | RPS6KA5 |
|  |  |  |  |  | RPUSD2  |
|  |  |  |  |  | RRAGB   |
|  |  |  |  |  | RTN2    |
|  |  |  |  |  | RTTN    |
|  |  |  |  |  | RUNX1   |
|  |  |  |  |  | RUNX1T1 |
|  |  |  |  |  | S100A11 |
|  |  |  |  |  | S100A13 |
|  |  |  |  |  | S100A3  |
|  |  |  |  |  | S100A6  |
|  |  |  |  |  | S1PR3   |
|  |  |  |  |  | SAE1    |
|  |  |  |  |  | SAPS3   |
|  |  |  |  |  | SARDH   |
|  |  |  |  |  | SBK1    |
|  |  |  |  |  | SCAMP1  |

|  |  |  |  |  |           |
|--|--|--|--|--|-----------|
|  |  |  |  |  | SCAMP3    |
|  |  |  |  |  | SCAND3    |
|  |  |  |  |  | SCD       |
|  |  |  |  |  | SCD5      |
|  |  |  |  |  | SCGB3A2   |
|  |  |  |  |  | SCN2B     |
|  |  |  |  |  | SCNN1A    |
|  |  |  |  |  | SCRN1     |
|  |  |  |  |  | SCUBE3    |
|  |  |  |  |  | SDHA      |
|  |  |  |  |  | SDK2      |
|  |  |  |  |  | SEC11A    |
|  |  |  |  |  | SEC14L1   |
|  |  |  |  |  | SEC22A    |
|  |  |  |  |  | SEC31A    |
|  |  |  |  |  | SECISBP2L |
|  |  |  |  |  | SELV      |
|  |  |  |  |  | SEMA3A    |
|  |  |  |  |  | SEMA5A    |
|  |  |  |  |  | SEMA6A    |
|  |  |  |  |  | SEPT6     |
|  |  |  |  |  | SEPT9     |
|  |  |  |  |  | SEPW1     |
|  |  |  |  |  | SERPINC1  |
|  |  |  |  |  | SERPINE2  |
|  |  |  |  |  | SERPINF1  |
|  |  |  |  |  | SERTAD4   |
|  |  |  |  |  | SETBP1    |
|  |  |  |  |  | SETD3     |
|  |  |  |  |  | SEZ6L2    |
|  |  |  |  |  | SF3B1     |
|  |  |  |  |  | SFRP1     |
|  |  |  |  |  | SFRP2     |
|  |  |  |  |  | SFRS14    |
|  |  |  |  |  | SFRS18    |
|  |  |  |  |  | SFRS9     |
|  |  |  |  |  | SFXN4     |
|  |  |  |  |  | SGCB      |
|  |  |  |  |  | SGK       |
|  |  |  |  |  | SGK1      |
|  |  |  |  |  | SGPL1     |
|  |  |  |  |  | SH3GL3    |
|  |  |  |  |  | SH3KBP1   |
|  |  |  |  |  | SH3PXD2B  |
|  |  |  |  |  | SH3TC1    |
|  |  |  |  |  | SHISA5    |
|  |  |  |  |  | SHROOM2   |
|  |  |  |  |  | SIGLEC6   |
|  |  |  |  |  | SILV      |
|  |  |  |  |  | SIPA1L2   |
|  |  |  |  |  | SLC12A2   |
|  |  |  |  |  | SLC16A1   |
|  |  |  |  |  | SLC16A3   |
|  |  |  |  |  | SLC16A5   |
|  |  |  |  |  | SLC1A3    |
|  |  |  |  |  | SLC1A6    |

|  |  |  |  |  |          |
|--|--|--|--|--|----------|
|  |  |  |  |  | SLC22A5  |
|  |  |  |  |  | SLC23A1  |
|  |  |  |  |  | SLC25A14 |
|  |  |  |  |  | SLC25A18 |
|  |  |  |  |  | SLC25A20 |
|  |  |  |  |  | SLC25A25 |
|  |  |  |  |  | SLC25A36 |
|  |  |  |  |  | SLC25A38 |
|  |  |  |  |  | SLC27A3  |
|  |  |  |  |  | SLC2A12  |
|  |  |  |  |  | SLC2A14  |
|  |  |  |  |  | SLC2A3   |
|  |  |  |  |  | SLC2A5   |
|  |  |  |  |  | SLC35D2  |
|  |  |  |  |  | SLC35E1  |
|  |  |  |  |  | SLC35F1  |
|  |  |  |  |  | SLC35F2  |
|  |  |  |  |  | SLC38A1  |
|  |  |  |  |  | SLC38A2  |
|  |  |  |  |  | SLC38A9  |
|  |  |  |  |  | SLC39A10 |
|  |  |  |  |  | SLC39A14 |
|  |  |  |  |  | SLC43A2  |
|  |  |  |  |  | SLC4A7   |
|  |  |  |  |  | SLC5A6   |
|  |  |  |  |  | SLC6A6   |
|  |  |  |  |  | SLC7A11  |
|  |  |  |  |  | SLC7A2   |
|  |  |  |  |  | SLC7A3   |
|  |  |  |  |  | SLC7A6   |
|  |  |  |  |  | SLC7A9   |
|  |  |  |  |  | SLCO1A2  |
|  |  |  |  |  | SLCO2A1  |
|  |  |  |  |  | SLCO2B1  |
|  |  |  |  |  | SLIT2    |
|  |  |  |  |  | SLIT3    |
|  |  |  |  |  | SLN      |
|  |  |  |  |  | SMAD3    |
|  |  |  |  |  | SMAD4    |
|  |  |  |  |  | SMAD5    |
|  |  |  |  |  | SMAD7    |
|  |  |  |  |  | SMAP1    |
|  |  |  |  |  | SMAP2    |
|  |  |  |  |  | SMARCD1  |
|  |  |  |  |  | SMOC2    |
|  |  |  |  |  | SMS      |
|  |  |  |  |  | SMTNL2   |
|  |  |  |  |  | SMYD4    |
|  |  |  |  |  | SNHG8    |
|  |  |  |  |  | SNORA10  |
|  |  |  |  |  | SNORA8   |
|  |  |  |  |  | SNORD123 |
|  |  |  |  |  | SNTB2    |
|  |  |  |  |  | SNX16    |
|  |  |  |  |  | SNX2     |
|  |  |  |  |  | SNX24    |

|  |  |  |  |  |            |
|--|--|--|--|--|------------|
|  |  |  |  |  | SOCS1      |
|  |  |  |  |  | SORBS1     |
|  |  |  |  |  | SORCS1     |
|  |  |  |  |  | SORL1      |
|  |  |  |  |  | SORT1      |
|  |  |  |  |  | SOX11      |
|  |  |  |  |  | SOX15      |
|  |  |  |  |  | SOX17      |
|  |  |  |  |  | SOX3       |
|  |  |  |  |  | SP110      |
|  |  |  |  |  | SP3        |
|  |  |  |  |  | SP5        |
|  |  |  |  |  | SP6        |
|  |  |  |  |  | SPARCL1    |
|  |  |  |  |  | SPATA17    |
|  |  |  |  |  | SPATA18    |
|  |  |  |  |  | SPATA7     |
|  |  |  |  |  | SPATS2     |
|  |  |  |  |  | SPINT1     |
|  |  |  |  |  | SPNS1      |
|  |  |  |  |  | SPNS2      |
|  |  |  |  |  | SPRYD4     |
|  |  |  |  |  | SPTAN1     |
|  |  |  |  |  | SPTLC1     |
|  |  |  |  |  | SRC        |
|  |  |  |  |  | SRP68      |
|  |  |  |  |  | SSSCA1     |
|  |  |  |  |  | SSU72      |
|  |  |  |  |  | ST6GAL1    |
|  |  |  |  |  | ST6GALNAC2 |
|  |  |  |  |  | ST6GALNAC3 |
|  |  |  |  |  | STARD13    |
|  |  |  |  |  | STARD8     |
|  |  |  |  |  | STC1       |
|  |  |  |  |  | STEAP3     |
|  |  |  |  |  | STIP1      |
|  |  |  |  |  | STON1      |
|  |  |  |  |  | STOX2      |
|  |  |  |  |  | STRA6      |
|  |  |  |  |  | STRAP      |
|  |  |  |  |  | STRC       |
|  |  |  |  |  | STRN4      |
|  |  |  |  |  | STS-1      |
|  |  |  |  |  | STX6       |
|  |  |  |  |  | STX8       |
|  |  |  |  |  | STYXL1     |
|  |  |  |  |  | SULF2      |
|  |  |  |  |  | SULT1A1    |
|  |  |  |  |  | SULT1A2    |
|  |  |  |  |  | SUPT3H     |
|  |  |  |  |  | SUSD2      |
|  |  |  |  |  | SUV420H1   |
|  |  |  |  |  | SV2A       |
|  |  |  |  |  | SVEP1      |
|  |  |  |  |  | SVIL       |
|  |  |  |  |  | SYDE1      |

|  |  |  |  |  |          |
|--|--|--|--|--|----------|
|  |  |  |  |  | SYNE2    |
|  |  |  |  |  | SYNJ2    |
|  |  |  |  |  | TAC3     |
|  |  |  |  |  | TACSTD2  |
|  |  |  |  |  | TAF4     |
|  |  |  |  |  | TAF6L    |
|  |  |  |  |  | TAF9L    |
|  |  |  |  |  | TAGLN    |
|  |  |  |  |  | TANC1    |
|  |  |  |  |  | TANC2    |
|  |  |  |  |  | TAOK1    |
|  |  |  |  |  | TARDBP   |
|  |  |  |  |  | TAX1BP1  |
|  |  |  |  |  | TBC1D14  |
|  |  |  |  |  | TBCB     |
|  |  |  |  |  | TBCE     |
|  |  |  |  |  | TBKBP1   |
|  |  |  |  |  | TBX3     |
|  |  |  |  |  | TC2N     |
|  |  |  |  |  | TCEA3    |
|  |  |  |  |  | TCEAL2   |
|  |  |  |  |  | TCF2     |
|  |  |  |  |  | TCF4     |
|  |  |  |  |  | TDG      |
|  |  |  |  |  | TEAD2    |
|  |  |  |  |  | TEAD3    |
|  |  |  |  |  | TEAD4    |
|  |  |  |  |  | TET1     |
|  |  |  |  |  | TF       |
|  |  |  |  |  | TFAP2A   |
|  |  |  |  |  | TFAP2B   |
|  |  |  |  |  | TFAP2C   |
|  |  |  |  |  | TFIP11   |
|  |  |  |  |  | TGFBR2   |
|  |  |  |  |  | TGM1     |
|  |  |  |  |  | THPO     |
|  |  |  |  |  | THSD3    |
|  |  |  |  |  | TIAM2    |
|  |  |  |  |  | TICAM2   |
|  |  |  |  |  | TIGA1    |
|  |  |  |  |  | TIGD7    |
|  |  |  |  |  | TINAGL1  |
|  |  |  |  |  | TKT      |
|  |  |  |  |  | TLE3     |
|  |  |  |  |  | TLE4     |
|  |  |  |  |  | TLK2     |
|  |  |  |  |  | TLN2     |
|  |  |  |  |  | TM7SF3   |
|  |  |  |  |  | TMC7     |
|  |  |  |  |  | TMED3    |
|  |  |  |  |  | TMEFF1   |
|  |  |  |  |  | TMEM125  |
|  |  |  |  |  | TMEM128  |
|  |  |  |  |  | TMEM132A |
|  |  |  |  |  | TMEM144  |
|  |  |  |  |  | TMEM150A |



|  |  |  |  |  |          |
|--|--|--|--|--|----------|
|  |  |  |  |  | TMEM154  |
|  |  |  |  |  | TMEM178  |
|  |  |  |  |  | TMEM184B |
|  |  |  |  |  | TMEM184C |
|  |  |  |  |  | TMEM195  |
|  |  |  |  |  | TMEM231  |
|  |  |  |  |  | TMEM233  |
|  |  |  |  |  | TMEM30B  |
|  |  |  |  |  | TMEM41B  |
|  |  |  |  |  | TMEM54   |
|  |  |  |  |  | TMEM68   |
|  |  |  |  |  | TMEM77   |
|  |  |  |  |  | TMEM87A  |
|  |  |  |  |  | TMEM88   |
|  |  |  |  |  | TMTC1    |
|  |  |  |  |  | TMX4     |
|  |  |  |  |  | TNC      |
|  |  |  |  |  | TNFRSF19 |
|  |  |  |  |  | TNFRSF1A |
|  |  |  |  |  | TNFSF10  |
|  |  |  |  |  | TNFSF12  |
|  |  |  |  |  | TNNT2    |
|  |  |  |  |  | TNPO1    |
|  |  |  |  |  | TOMM34   |
|  |  |  |  |  | TP53BP1  |
|  |  |  |  |  | TP53TG1  |
|  |  |  |  |  | TP63     |
|  |  |  |  |  | TP73L    |
|  |  |  |  |  | TPM1     |
|  |  |  |  |  | TPM4     |
|  |  |  |  |  | TRAK1    |
|  |  |  |  |  | TRH      |
|  |  |  |  |  | TRIL     |
|  |  |  |  |  | TRIM17   |
|  |  |  |  |  | TRIM37   |
|  |  |  |  |  | TRIM6    |
|  |  |  |  |  | TRIM71   |
|  |  |  |  |  | TRIM9    |
|  |  |  |  |  | TRIML2   |
|  |  |  |  |  | TRIP10   |
|  |  |  |  |  | TRPC1    |
|  |  |  |  |  | TRPV6    |
|  |  |  |  |  | TRRAP    |
|  |  |  |  |  | TSPAN13  |
|  |  |  |  |  | TSPAN3   |
|  |  |  |  |  | TST      |
|  |  |  |  |  | TTC17    |
|  |  |  |  |  | TTC23    |
|  |  |  |  |  | TTLL1    |
|  |  |  |  |  | TTLL5    |
|  |  |  |  |  | TTR      |
|  |  |  |  |  | TTYH3    |
|  |  |  |  |  | TUB      |
|  |  |  |  |  | TUBB2B   |
|  |  |  |  |  | TUBB3    |
|  |  |  |  |  | TUBB4    |

|  |  |  |  |  |         |
|--|--|--|--|--|---------|
|  |  |  |  |  | TUBB8   |
|  |  |  |  |  | TUFT1   |
|  |  |  |  |  | TULP3   |
|  |  |  |  |  | TULP4   |
|  |  |  |  |  | TUSC3   |
|  |  |  |  |  | TWIST1  |
|  |  |  |  |  | TXLNA   |
|  |  |  |  |  | TXNDC3  |
|  |  |  |  |  | TXNDC9  |
|  |  |  |  |  | TXNRD2  |
|  |  |  |  |  | TYRO3   |
|  |  |  |  |  | UBB     |
|  |  |  |  |  | UBE2E1  |
|  |  |  |  |  | UBE2L6  |
|  |  |  |  |  | UBE2V1  |
|  |  |  |  |  | UBE2Z   |
|  |  |  |  |  | UBE3A   |
|  |  |  |  |  | UBQLN4  |
|  |  |  |  |  | UBR5    |
|  |  |  |  |  | UBXN4   |
|  |  |  |  |  | UCA1    |
|  |  |  |  |  | UCHL1   |
|  |  |  |  |  | UCHL5   |
|  |  |  |  |  | UCRC    |
|  |  |  |  |  | UGT2B10 |
|  |  |  |  |  | UGT3A2  |
|  |  |  |  |  | ULK1    |
|  |  |  |  |  | UNC5B   |
|  |  |  |  |  | UNKL    |
|  |  |  |  |  | UPF2    |
|  |  |  |  |  | UPF3B   |
|  |  |  |  |  | UPK2    |
|  |  |  |  |  | USP13   |
|  |  |  |  |  | USP36   |
|  |  |  |  |  | USP46   |
|  |  |  |  |  | USP5    |
|  |  |  |  |  | UVRAG   |
|  |  |  |  |  | VAMP1   |
|  |  |  |  |  | VANGL2  |
|  |  |  |  |  | VARS2   |
|  |  |  |  |  | VAT1    |
|  |  |  |  |  | VAV3    |
|  |  |  |  |  | VCAN    |
|  |  |  |  |  | VCX     |
|  |  |  |  |  | VEZF1   |
|  |  |  |  |  | VGf     |
|  |  |  |  |  | VGLL1   |
|  |  |  |  |  | VGLL4   |
|  |  |  |  |  | VIL2    |
|  |  |  |  |  | VPS24   |
|  |  |  |  |  | VPS28   |
|  |  |  |  |  | VPS33B  |
|  |  |  |  |  | VPS35   |
|  |  |  |  |  | VPS37C  |
|  |  |  |  |  | VTCN1   |
|  |  |  |  |  | VTN     |

|  |  |  |  |         |
|--|--|--|--|---------|
|  |  |  |  | VWA5A   |
|  |  |  |  | WARS    |
|  |  |  |  | WASF3   |
|  |  |  |  | WBP5    |
|  |  |  |  | WDFY2   |
|  |  |  |  | WDR27   |
|  |  |  |  | WDR4    |
|  |  |  |  | WDR42A  |
|  |  |  |  | WDR54   |
|  |  |  |  | WDR6    |
|  |  |  |  | WDR68   |
|  |  |  |  | WDR72   |
|  |  |  |  | WDR82   |
|  |  |  |  | WDR86   |
|  |  |  |  | WDSUB1  |
|  |  |  |  | WDYHV1  |
|  |  |  |  | WEE1    |
|  |  |  |  | WNK1    |
|  |  |  |  | WNT11   |
|  |  |  |  | WNT4    |
|  |  |  |  | WNT5B   |
|  |  |  |  | WNT6    |
|  |  |  |  | WSB1    |
|  |  |  |  | WWC3    |
|  |  |  |  | XAGE2B  |
|  |  |  |  | XKR6    |
|  |  |  |  | XKRX    |
|  |  |  |  | XPC     |
|  |  |  |  | XPNPEP1 |
|  |  |  |  | XPR1    |
|  |  |  |  | XYLT2   |
|  |  |  |  | YAP1    |
|  |  |  |  | YEATS2  |
|  |  |  |  | YPEL1   |
|  |  |  |  | YTHDC1  |
|  |  |  |  | YWHAZ   |
|  |  |  |  | ZBTB20  |
|  |  |  |  | ZBTB34  |
|  |  |  |  | ZBTB4   |
|  |  |  |  | ZC3H12C |
|  |  |  |  | ZC3H8   |
|  |  |  |  | ZCCHC11 |
|  |  |  |  | ZDHHC13 |
|  |  |  |  | ZDHHC18 |
|  |  |  |  | ZDHHC4  |
|  |  |  |  | ZDHHC7  |
|  |  |  |  | ZDHHC8  |
|  |  |  |  | ZFC3H1  |
|  |  |  |  | ZFHX3   |
|  |  |  |  | ZFP36L1 |
|  |  |  |  | ZFP37   |
|  |  |  |  | ZFP82   |
|  |  |  |  | ZIC2    |
|  |  |  |  | ZMIZ1   |
|  |  |  |  | ZMYM2   |
|  |  |  |  | ZNF10   |

|  |  |  |  |         |
|--|--|--|--|---------|
|  |  |  |  | ZNF136  |
|  |  |  |  | ZNF138  |
|  |  |  |  | ZNF185  |
|  |  |  |  | ZNF204  |
|  |  |  |  | ZNF207  |
|  |  |  |  | ZNF215  |
|  |  |  |  | ZNF217  |
|  |  |  |  | ZNF219  |
|  |  |  |  | ZNF248  |
|  |  |  |  | ZNF26   |
|  |  |  |  | ZNF271  |
|  |  |  |  | ZNF275  |
|  |  |  |  | ZNF280D |
|  |  |  |  | ZNF286A |
|  |  |  |  | ZNF286C |
|  |  |  |  | ZNF322A |
|  |  |  |  | ZNF331  |
|  |  |  |  | ZNF334  |
|  |  |  |  | ZNF337  |
|  |  |  |  | ZNF384  |
|  |  |  |  | ZNF415  |
|  |  |  |  | ZNF423  |
|  |  |  |  | ZNF426  |
|  |  |  |  | ZNF430  |
|  |  |  |  | ZNF431  |
|  |  |  |  | ZNF433  |
|  |  |  |  | ZNF454  |
|  |  |  |  | ZNF462  |
|  |  |  |  | ZNF488  |
|  |  |  |  | ZNF511  |
|  |  |  |  | ZNF518B |
|  |  |  |  | ZNF525  |
|  |  |  |  | ZNF552  |
|  |  |  |  | ZNF558  |
|  |  |  |  | ZNF564  |
|  |  |  |  | ZNF567  |
|  |  |  |  | ZNF573  |
|  |  |  |  | ZNF584  |
|  |  |  |  | ZNF589  |
|  |  |  |  | ZNF606  |
|  |  |  |  | ZNF608  |
|  |  |  |  | ZNF610  |
|  |  |  |  | ZNF627  |
|  |  |  |  | ZNF641  |
|  |  |  |  | ZNF680  |
|  |  |  |  | ZNF701  |
|  |  |  |  | ZNF702P |
|  |  |  |  | ZNF721  |
|  |  |  |  | ZNF74   |
|  |  |  |  | ZNF750  |
|  |  |  |  | ZNF761  |
|  |  |  |  | ZNF763  |
|  |  |  |  | ZNF783  |
|  |  |  |  | ZNF813  |
|  |  |  |  | ZNF816A |
|  |  |  |  | ZNF827  |

|  |  |  |  |  |         |
|--|--|--|--|--|---------|
|  |  |  |  |  | ZNF83   |
|  |  |  |  |  | ZNF845  |
|  |  |  |  |  | ZNF91   |
|  |  |  |  |  | ZNF93   |
|  |  |  |  |  | ZNHIT1  |
|  |  |  |  |  | ZNRF2   |
|  |  |  |  |  | ZSCAN18 |

|                                                                                        |
|----------------------------------------------------------------------------------------|
| fetal_vs_phh_<br>anova<br>AND<br>hlc_vs_fetal_<br>anova<br>AND<br>hlc_vs_phh_<br>anova |
| A1CF                                                                                   |
| AARS2                                                                                  |
| AASS                                                                                   |
| ABCA6                                                                                  |
| ABCB4                                                                                  |
| ABCB7                                                                                  |
| ABCC4                                                                                  |
| ABCC5                                                                                  |
| ABCC6                                                                                  |
| ABHD2                                                                                  |
| ABL1                                                                                   |
| ABR                                                                                    |
| ABTB1                                                                                  |
| ACAT1                                                                                  |
| ACHE                                                                                   |
| ACMSD                                                                                  |
| ACOT12                                                                                 |
| ACOT7                                                                                  |
| ACOX2                                                                                  |
| ACSL1                                                                                  |
| ACSM2A                                                                                 |
| ACSM2B                                                                                 |
| ACVR2A                                                                                 |
| ACY1                                                                                   |
| ADAMTS9                                                                                |
| ADD3                                                                                   |
| ADM                                                                                    |
| ADNP                                                                                   |
| ADRB2                                                                                  |
| AGPAT2                                                                                 |
| AGT                                                                                    |
| AGTR1                                                                                  |
| AGXT                                                                                   |
| AHNAK                                                                                  |
| AIF1                                                                                   |
| AK1                                                                                    |
| AK2                                                                                    |
| AKAP12                                                                                 |
| AKAP13                                                                                 |
| AKIRIN1                                                                                |
| AKR1B15                                                                                |
| ALAD                                                                                   |
| ALCAM                                                                                  |
| ALDH18A1                                                                               |
| ALDH1A1                                                                                |
| ALDH1L1                                                                                |
| ALDH2                                                                                  |

|          |
|----------|
| ALDH3A2  |
| ALDH4A1  |
| ALDH7A1  |
| ALDH8A1  |
| ALDH9A1  |
| ALDOA    |
| ALDOB    |
| AMMECR1  |
| ANG      |
| ANGPT1   |
| ANGPTL4  |
| ANKRA2   |
| ANKRD1   |
| ANKRD57  |
| ANP32B   |
| ANXA2    |
| AP1S1    |
| AP2A1    |
| AP3B1    |
| AP3D1    |
| APOB     |
| APOC2    |
| APOC3    |
| APOH     |
| APPBP2   |
| AQP11    |
| ARAP3    |
| ARG1     |
| ARHGAP17 |
| ARHGAP23 |
| ARHGAP24 |
| ARHGDIA  |
| ARHGEF16 |
| ARHGEF5  |
| ARID4A   |
| ARL4C    |
| ARMCX2   |
| ART4     |
| ASB1     |
| ASB8     |
| ASB9     |
| ASF1B    |
| ASGR1    |
| ASGR2    |
| ASH2L    |
| ASL      |
| ASPM     |
| ATF5     |
| ATF6B    |
| ATG4A    |
| ATG7     |
| ATM      |
| ATP2B2   |
| ATP5J    |
| ATP6V0D1 |
| ATP6V0E1 |

|           |
|-----------|
| ATP6V0E2  |
| ATP6V1A   |
| ATP6V1E2  |
| ATPAF1    |
| ATRN      |
| ATXN2     |
| AURKB     |
| AVPI1     |
| AXL       |
| AXUD1     |
| B2M       |
| B3GALNT1  |
| BAT3      |
| BBX       |
| BCHE      |
| BCKDHA    |
| BCL2L2    |
| BEND5     |
| BEX2      |
| BHLHB2    |
| BHMT2     |
| BID       |
| BIRC6     |
| BMP1      |
| BMP4      |
| BOLA2     |
| BPNT1     |
| BPTF      |
| BRMS1     |
| BTBD7     |
| C10orf137 |
| C10orf47  |
| C10orf6   |
| C12orf32  |
| C12orf4   |
| C12orf41  |
| C12orf48  |
| C12orf51  |
| C12orf57  |
| C12orf76  |
| C13orf15  |
| C13orf7   |
| C14orf131 |
| C14orf174 |
| C14orf68  |
| C14orf93  |
| C15orf21  |
| C15orf42  |
| C16orf35  |
| C17orf41  |
| C19orf64  |
| C19orf66  |
| C1orf128  |
| C1orf135  |
| C1orf54   |
| C1QTNF6   |



|           |
|-----------|
| C20orf160 |
| C20orf199 |
| C20orf56  |
| C21orf33  |
| C21orf57  |
| C21orf58  |
| C22orf13  |
| C22orf28  |
| C22orf30  |
| C2orf56   |
| C3        |
| C3orf21   |
| C3orf52   |
| C3orf70   |
| C5orf30   |
| C5orf32   |
| C6orf115  |
| C6orf173  |
| C6orf48   |
| C6orf66   |
| C7orf55   |
| C8orf33   |
| C9orf100  |
| C9orf103  |
| C9orf21   |
| C9orf45   |
| C9orf78   |
| CA14      |
| CALML4    |
| CAP1      |
| CAPRIN1   |
| CARD8     |
| CARS      |
| CASP2     |
| CASP4     |
| CAST      |
| CBR1      |
| CCBL1     |
| CCDC28B   |
| CCDC34    |
| CCDC53    |
| CCDC77    |
| CCL14     |
| CCNA2     |
| CCND1     |
| CCND3     |
| CCNDBP1   |
| CCRN4L    |
| CCT8      |
| CD14      |
| CD151     |
| CD1D      |
| CD248     |
| CD81      |
| CD93      |
| CDC2      |

|          |
|----------|
| CDC20    |
| CDC23    |
| CDC25A   |
| CDC42EP1 |
| CDC45L   |
| CDCA3    |
| CDK10    |
| CDK2     |
| CDK6     |
| CDKN1A   |
| CDKN3    |
| CDRT4    |
| CDT1     |
| CEBPB    |
| CECR1    |
| CENPA    |
| CENPE    |
| CENPF    |
| CENPV    |
| CEP135   |
| CEP152   |
| CERK     |
| CFB      |
| CFH      |
| CFHR1    |
| CFHR2    |
| CFI      |
| CGN      |
| CHAF1B   |
| CHD7     |
| CHD9     |
| CHIC2    |
| CHN2     |
| CHPT1    |
| CHST7    |
| CIB1     |
| CIDEB    |
| CKAP2L   |
| CKAP5    |
| CLCC1    |
| CLDN7    |
| CLDND1   |
| CLIP1    |
| CLNS1A   |
| CLSTN1   |
| CMAS     |
| CMIP     |
| CMPK1    |
| CMTM3    |
| CMTM7    |
| CNIH     |
| CNOT6    |
| CNOT8    |
| CNTNAP2  |
| COBRA1   |
| COL1A2   |

|          |
|----------|
| COL4A1   |
| COL4A3BP |
| COL5A2   |
| COMT     |
| COPG2    |
| COPS7B   |
| COQ9     |
| COX5B    |
| COX7C    |
| CP110    |
| CPB2     |
| CPN1     |
| CPSF4    |
| CPVL     |
| CRB3     |
| CREB3L2  |
| CRK      |
| CRLF3    |
| CSE1L    |
| CSF1R    |
| CSF3R    |
| CSNK1E   |
| CSRP2    |
| CTAGE6   |
| CTSE     |
| CXCL14   |
| CYB561   |
| CYB5A    |
| CYBA     |
| CYCSL1   |
| CYP2J2   |
| CYP39A1  |
| CYP3A5   |
| CYP4A11  |
| CYP4F12  |
| CYP4F3   |
| CYP4V2   |
| CYTSB    |
| DACT3    |
| DBI      |
| DCAF7    |
| DCP2     |
| DDA1     |
| DDB1     |
| DDC      |
| DDX11    |
| DDX23    |
| DDX54    |
| DECR1    |
| DECR2    |
| DEDD2    |
| DENND2A  |
| DHDDS    |
| DHRS4    |
| DHX32    |
| DICER1   |

|         |
|---------|
| DIO1    |
| DLGAP5  |
| DMAP1   |
| DMC1    |
| DNAJC12 |
| DNASE1  |
| DNASE2  |
| DNMT1   |
| DOK4    |
| DPF2    |
| DPM2    |
| DPYD    |
| DSP     |
| DSTN    |
| DUS3L   |
| DUSP14  |
| DUSP23  |
| DUSP28  |
| DUSP6   |
| DVL3    |
| DYNC1H1 |
| DYNLL1  |
| EARS2   |
| EBP     |
| EBPL    |
| ECH1    |
| ECHDC2  |
| EEF1A2  |
| EEF1D   |
| EGFLAM  |
| EHD4    |
| EHHADH  |
| EIF2AK1 |
| EIF3D   |
| EIF3L   |
| EIF4A1  |
| EIF5A   |
| ELF3    |
| ELL2    |
| ELOVL1  |
| ELOVL2  |
| ELP2    |
| EMILIN2 |
| EML1    |
| ENPP5   |
| EP400   |
| EPB41L3 |
| EPHB6   |
| ERI1    |
| ERICH1  |
| ERP29   |
| ERRFI1  |
| ESAM    |
| ETFDH   |
| ETS1    |
| EVC2    |

|          |
|----------|
| EXO1     |
| EYA2     |
| F11      |
| F11R     |
| F5       |
| F7       |
| F9       |
| FAAH2    |
| FABP1    |
| FABP7    |
| FADS1    |
| FAM111A  |
| FAM117B  |
| FAM125B  |
| FAM129A  |
| FAM160B2 |
| FAM176A  |
| FAM177A1 |
| FAM39DP  |
| FAM46A   |
| FAM82A2  |
| FASTKD1  |
| FBXL20   |
| FBXO11   |
| FBXO18   |
| FBXO32   |
| FBXO38   |
| FBXO5    |
| FBXW5    |
| FEN1     |
| FES      |
| FEZ1     |
| FEZ2     |
| FGD5     |
| FGFR3    |
| FKBP1A   |
| FLJ14213 |
| FLJ21986 |
| FOXA1    |
| FOXA3    |
| FOXJ2    |
| FOXM1    |
| FSCN1    |
| FTCD     |
| FTHL12   |
| FTHL8    |
| FXYD1    |
| FXYD2    |
| G6PC     |
| GAL3ST1  |
| GALK1    |
| GAMT     |
| GAS1     |
| GBA3     |
| GBAS     |
| GBGT1    |

|            |
|------------|
| GBP2       |
| GCA        |
| GCH1       |
| GCHFR      |
| GCLC       |
| GCNT2      |
| GGA3       |
| GGCX       |
| GHDC       |
| GIN3       |
| GLYAT      |
| GLYCTK     |
| GNA13      |
| GOT1       |
| GPOR       |
| GPM6B      |
| GPR128     |
| GPR175     |
| GPR177     |
| GPR37      |
| GPR56      |
| GPRASP2    |
| GPRC5C     |
| GPX1       |
| GSDMD      |
| GSR        |
| GSTA1      |
| GSTA5      |
| GSTK1      |
| GSTT1      |
| GTF2E2     |
| GTF2IRD2B  |
| GTF3C2     |
| GUSB       |
| H19        |
| H2AFY      |
| H3F3A      |
| HABP2      |
| HACL1      |
| HADH       |
| HADH2      |
| HAGH       |
| HAO1       |
| HCFC1      |
| HCN4       |
| HDAC2      |
| HDDC2      |
| HEG1       |
| HERC5      |
| HES4       |
| HEXB       |
| HFE2       |
| HGFAC      |
| HGS        |
| HIST1H4C   |
| HIST2H2AA3 |

|           |
|-----------|
| HIST2H2AB |
| HJURP     |
| HLA-H     |
| HMGB2     |
| HMGXB4    |
| HMMR      |
| HNRNPAB   |
| HOXB2     |
| HP        |
| HPD       |
| HPN       |
| HPR       |
| HPS1      |
| HPX       |
| HRASLS3   |
| HRSP12    |
| HSD17B10  |
| HSD17B11  |
| HSZFP36   |
| HTRA1     |
| HTT       |
| HULC      |
| HYOU1     |
| IAH1      |
| IARS2     |
| ICAM2     |
| ID3       |
| IER3      |
| IFI35     |
| IFI6      |
| IFITM1    |
| IFITM2    |
| IFITM3    |
| IFRD1     |
| IFRD2     |
| IFT88     |
| IGF2BP2   |
| IGF2BP3   |
| IGFBP7    |
| IGSF1     |
| IKBKG     |
| IL20RB    |
| IMPDH2    |
| INTS4     |
| IP6K1     |
| IQCK      |
| IRAK2     |
| IRF8      |
| IRX3      |
| ISCA1     |
| ISG20     |
| ISOC2     |
| ITIH1     |
| ITIH2     |
| ITIH4     |
| ITM2A     |

|           |
|-----------|
| ITM2C     |
| ITPR1     |
| ITPRIPL2  |
| IVD       |
| IYD       |
| JAG1      |
| JAM3      |
| JARID2    |
| JMJD8     |
| KANK3     |
| KANK4     |
| KAT2B     |
| KBTBD11   |
| KCNS3     |
| KCTD14    |
| KCTD5     |
| KEAP1     |
| KHK       |
| KIAA0101  |
| KIAA0319L |
| KIAA0355  |
| KIAA0528  |
| KIAA0922  |
| KIAA1026  |
| KIAA1712  |
| KIAA1797  |
| KIAA1881  |
| KIAA2013  |
| KIF12     |
| KIF15     |
| KIF1B     |
| KIF20A    |
| KIF20B    |
| KIF2C     |
| KIFC1     |
| KIT       |
| KLHL36    |
| KLKB1     |
| KNG1      |
| KNTC1     |
| KPNB1     |
| KRT18     |
| KRT18P13  |
| KRT18P28  |
| KRT222    |
| KYNU      |
| LACTB2    |
| LAMC2     |
| LANCL1    |
| LARP6     |
| LARS      |
| LBH       |
| LCMT1     |
| LEAP-2    |
| LGALS2    |
| LIN37     |



|              |
|--------------|
| LIPG         |
| LITAF        |
| LMNB2        |
| LMO4         |
| LOC100128266 |
| LOC100128410 |
| LOC100129028 |
| LOC100129552 |
| LOC100129905 |
| LOC100130506 |
| LOC100130707 |
| LOC100131205 |
| LOC100131735 |
| LOC100132287 |
| LOC100132394 |
| LOC100132728 |
| LOC100132795 |
| LOC100133923 |
| LOC100134134 |
| LOC146177    |
| LOC148915    |
| LOC149501    |
| LOC205251    |
| LOC338799    |
| LOC339970    |
| LOC340274    |
| LOC340598    |
| LOC387763    |
| LOC388514    |
| LOC389599    |
| LOC390530    |
| LOC391075    |
| LOC400027    |
| LOC440145    |
| LOC441377    |
| LOC441506    |
| LOC550643    |
| LOC642252    |
| LOC642502    |
| LOC642567    |
| LOC644037    |
| LOC644191    |
| LOC644743    |
| LOC645015    |
| LOC645166    |
| LOC645173    |
| LOC645515    |
| LOC645715    |
| LOC646294    |
| LOC646688    |
| LOC646723    |
| LOC647346    |
| LOC647786    |
| LOC648771    |
| LOC650646    |
| LOC653110    |

|           |
|-----------|
| LOC653381 |
| LOC653498 |
| LOC653635 |
| LOC653778 |
| LOC653888 |
| LOC654096 |
| LOC654103 |
| LOC727866 |
| LOC728037 |
| LOC728453 |
| LOC728553 |
| LOC728672 |
| LOC729208 |
| LOC729217 |
| LOC729887 |
| LOC730202 |
| LOC730246 |
| LOC730323 |
| LOC731950 |
| LOC81691  |
| LOXL4     |
| LPHN2     |
| LPP       |
| LRFN3     |
| LRIG1     |
| LRP3      |
| LRRC16    |
| LRRC28    |
| LRRFIP2   |
| LTBR      |
| LUZP1     |
| LYSMD4    |
| MACF1     |
| MAD1L1    |
| MAD2L1BP  |
| MAGED1    |
| MAGED2    |
| MALL      |
| MALT1     |
| MAP2K1    |
| MAP2K5    |
| MAPBPIP   |
| MAPKAP1   |
| MARCKSL1  |
| MARVELD3  |
| MASP1     |
| MASP2     |
| MBNL2     |
| MCM10     |
| MCM2      |
| MCM4      |
| MCM6      |
| MCM7      |
| MDC1      |
| MDK       |
| MED23     |

|          |
|----------|
| MED24    |
| MED25    |
| METTL1   |
| METTL7A  |
| METTL7B  |
| MFSD6    |
| MGC4677  |
| MGC57346 |
| MGEA5    |
| MICALL2  |
| MID1IP1  |
| MID2     |
| MIDN     |
| MLF2     |
| MMS19    |
| MMS19L   |
| MOBKL2C  |
| MPST     |
| MPV17    |
| MPV17L2  |
| MRPL11   |
| MRPL17   |
| MRPL20   |
| MRPL23   |
| MRPL36   |
| MRPL40   |
| MRPS27   |
| MSRA     |
| MSX1     |
| MT1H     |
| MTHFD2   |
| MTHFS    |
| MTL5     |
| MTO1     |
| MUC1     |
| MYADM    |
| MYC      |
| MYH10    |
| MYH9     |
| MYO6     |
| MYO9A    |
| MYPOP    |
| NAAA     |
| NARF     |
| NAT15    |
| NCALD    |
| NCAPD2   |
| NDC80    |
| NDRG2    |
| NDUFAF1  |
| NDUFAF3  |
| NEDD9    |
| NELF     |
| NEO1     |
| NFE2L1   |
| NFIB     |

|          |
|----------|
| NFIL3    |
| NGEF     |
| NINJ1    |
| NINJ2    |
| NIP7     |
| NIPBL    |
| NIPSNAP1 |
| NMRAL1   |
| NODAL    |
| NONO     |
| NOP16    |
| NOP2     |
| NR0B2    |
| NR1H3    |
| NR1I3    |
| NR2F2    |
| NRP1     |
| NSL1     |
| NT5DC3   |
| NT5E     |
| NT5M     |
| NTHL1    |
| NTN1     |
| NUAK2    |
| NUCB1    |
| NUCKS1   |
| NUDT15   |
| NUP160   |
| NUP205   |
| NUP43    |
| NUP93    |
| NUPR1    |
| NUSAP1   |
| NUTF2    |
| OAS1     |
| OAS2     |
| OBFC2A   |
| OCRL     |
| ODF2     |
| OR9A4    |
| ORAOV1   |
| ORC2L    |
| ORC3L    |
| OSBPL1A  |
| OSBPL9   |
| OSCP1    |
| OXCT2    |
| OXER1    |
| OXSR1    |
| P2RY2    |
| P4HB     |
| P4HTM    |
| P76      |
| P8       |
| PABPC1   |
| PABPC4   |

|          |
|----------|
| PACSIN2  |
| PALM     |
| PAMR1    |
| PAPSS1   |
| PAQR8    |
| PAQR9    |
| PARL     |
| PARP9    |
| PARVA    |
| PAWR     |
| PBLD     |
| PCBD1    |
| PCBP2    |
| PCDH24   |
| PCGF5    |
| PCK2     |
| PCNA     |
| PCYT2    |
| PDE12    |
| PDE9A    |
| PDGFRB   |
| PDIA3P   |
| PDXDC1   |
| PDZD8    |
| PEBP1    |
| PEG10    |
| PEPD     |
| PEX11G   |
| PEX16    |
| PFAS     |
| PFKP     |
| PHF21A   |
| PHIP     |
| PHKB     |
| PHLDA1   |
| PIK3R2   |
| PIM2     |
| PINK1    |
| PIP5K2A  |
| PJA1     |
| PKMYT1   |
| PKP2     |
| PLA2G12B |
| PLAA     |
| PLAG1    |
| PLCXD1   |
| PLD1     |
| PLD6     |
| PLEKHF1  |
| PLEKHG4  |
| PLGLB1   |
| PMVK     |
| POGK     |
| POLR2L   |
| POLR3A   |
| POLR3C   |

|           |
|-----------|
| POLR3GL   |
| POLR3H    |
| PON1      |
| PON2      |
| PPDPF     |
| PPIC      |
| PPIH      |
| PPP1R16A  |
| PPP1R1A   |
| PPP2R2A   |
| PPP2R3C   |
| QBP1      |
| PRAP1     |
| PRC1      |
| PRDX5     |
| PRIC285   |
| PRICKLE2  |
| PRKAB1    |
| PRKAG2    |
| PRKX      |
| PROC      |
| PROS1     |
| PRR4      |
| PSCD2     |
| PSMB10    |
| PSMB7     |
| PSMD12    |
| PSRC1     |
| PTBP2     |
| PTGES2    |
| PTGFRN    |
| PTH1R     |
| PTK2      |
| PTOV1     |
| PTPRF     |
| PTPRH     |
| PTPRM     |
| PTRF      |
| PTTG1     |
| PTTG3P    |
| PVRL2     |
| PWWP2B    |
| PXMP2     |
| QARS      |
| QDPR      |
| QPRT      |
| RAB11FIP1 |
| RAB11FIP5 |
| RAB13     |
| RAB23     |
| RAB27A    |
| RAB2B     |
| RAB31     |
| RAB32     |
| RAB9A     |
| RABGGTB   |

|          |
|----------|
| RABL2B   |
| RACGAP1  |
| RAP1GAP  |
| RAPGEF2  |
| RARA     |
| RASSF1   |
| RAVER2   |
| RBKS     |
| RBM12B   |
| RBM4     |
| RBP4     |
| RBPMS    |
| RCAN1    |
| RCOR3    |
| RDH5     |
| REEP6    |
| REPS2    |
| RETSAT   |
| RFWD3    |
| RGN      |
| RGS12    |
| RHBDD1   |
| RHOC     |
| RHOT1    |
| RHOU     |
| RIC8A    |
| RIPK2    |
| RIPK4    |
| RIPK5    |
| RMI1     |
| RNASE4   |
| RND3     |
| RNF126   |
| RNF135   |
| RNF144   |
| RNF144A  |
| RNF150   |
| RNF185   |
| RNMTL1   |
| RNPC3    |
| ROBO3    |
| ROMO1    |
| RPL15    |
| RPL23    |
| RPL36AL  |
| RPL41    |
| RPP21    |
| RPP38    |
| RPRC1    |
| RPS2     |
| RPS26P11 |
| RPS4X    |
| RPS6KB2  |
| RRAS2    |
| RREB1    |
| RRP15    |

|           |
|-----------|
| RSPO3     |
| RTKN      |
| RTN4      |
| RTP2      |
| RYK       |
| SAA4      |
| SACM1L    |
| SALL2     |
| SAMD9     |
| SAMM50    |
| SAT1      |
| SCAND1    |
| SCARA3    |
| SCCPDH    |
| SCG5      |
| SCYL1     |
| SDC4      |
| SDHB      |
| SDSL      |
| SEC24C    |
| SELENBP1  |
| SEMA4F    |
| SEMA6B    |
| SEPN1     |
| SEPT11    |
| SEPT2     |
| SEPX1     |
| SERF2     |
| SERPINA1  |
| SERPINA11 |
| SERPINA3  |
| SERPINA4  |
| SERPINA6  |
| SERPINB1  |
| SESN1     |
| SFRS4     |
| SGCE      |
| SH3BP4    |
| SHRM      |
| SIGLEC14  |
| SIK1      |
| SIK3      |
| SIPA1     |
| SKA1      |
| SKA2      |
| SKP2      |
| SLC11A2   |
| SLC15A3   |
| SLC15A4   |
| SLC16A4   |
| SLC16A9   |
| SLC20A1   |
| SLC25A15  |
| SLC25A43  |
| SLC27A2   |
| SLC2A1    |



|         |
|---------|
| SLC37A3 |
| SLC39A5 |
| SLC39A8 |
| SLC3A2  |
| SLC43A3 |
| SLC44A1 |
| SLC44A2 |
| SLC7A5  |
| SLC7A7  |
| SMAGP   |
| SMARCA1 |
| SMARCA1 |
| SMARCB1 |
| SMARCC1 |
| SMC3    |
| SMURF1  |
| SNAP29  |
| SNHG6   |
| SNRNP35 |
| SNRPD2  |
| SNUPN   |
| SNX27   |
| SOD1    |
| SON     |
| SORBS2  |
| SORD    |
| SOX4    |
| SOX9    |
| SPARC   |
| SPC24   |
| SPIN4   |
| SPINT2  |
| SPRY1   |
| SPRY2   |
| SPRYD3  |
| SQRDL   |
| SS18    |
| SSR4    |
| ST7     |
| STBD1   |
| STC2    |
| STK3    |
| STK40   |
| STMN3   |
| STOM    |
| STRADA  |
| STT3A   |
| STX3    |
| SUCLG1  |
| SUMO3   |
| SUPT16H |
| SUSD1   |
| SWAP70  |
| SYNJ1   |
| SYTL4   |
| TACC1   |

|                |
|----------------|
| TACC2          |
| TACSTD1        |
| TBC1D9B        |
| TBPL1          |
| TDO2           |
| TEK            |
| TERF2IP        |
| TFB2M          |
| TFPI           |
| TGIF1          |
| TH1L           |
| THSD4          |
| TIMP2          |
| TJP1           |
| TJP2           |
| TM4SF1         |
| TM4SF18        |
| TM4SF4         |
| TM4SF5         |
| TMEM140        |
| TMEM166        |
| TMEM176A       |
| TMEM176B       |
| TMEM181        |
| TMEM189-UBE2V1 |
| TMEM194A       |
| TMEM216        |
| TMEM217        |
| TMEM49         |
| TMEM51         |
| TMEM59         |
| TMEM86B        |
| TMOD1          |
| TMPRSS2        |
| TMPRSS6        |
| TNFAIP3        |
| TNFRSF10B      |
| TNFRSF12A      |
| TNFRSF14       |
| TNFRSF21       |
| TNS3           |
| TOM1L2         |
| TOP2B          |
| TP53AP1        |
| TPM2           |
| TPMT           |
| TPR            |
| TPST2          |
| TRAF3IP2       |
| TRAF6          |
| TRIM15         |
| TRIM26         |
| TRIM33         |
| TRIOBP         |
| TRIP6          |
| TRO            |

|         |
|---------|
| TSC22D2 |
| TSPAN17 |
| TSPO    |
| TSPYL1  |
| TSPYL3  |
| TSPYL5  |
| TSSC4   |
| TTC3    |
| TUBA1C  |
| TUBD1   |
| TUBG1   |
| TXN     |
| TXNDC12 |
| TXNRD1  |
| TYSND1  |
| U2AF1   |
| UAP1L1  |
| UBAP2L  |
| UBE2C   |
| UBE2D4  |
| UBE2T   |
| UBL4A   |
| UCHL5IP |
| UGP2    |
| UGT2B4  |
| UGT2B7  |
| UHRF1   |
| ULK4    |
| UNG     |
| UPB1    |
| UPP1    |
| UQCC    |
| UQCRQ   |
| UROD    |
| USE1    |
| USMG5   |
| USP15   |
| USP21   |
| VAMP5   |
| VBP1    |
| VCL     |
| VDAC3   |
| VIPR1   |
| VLDLR   |
| VNN3    |
| VOPP1   |
| VPS37A  |
| VPS8    |
| VRK1    |
| VSNL1   |
| WBP11   |
| WDR1    |
| WDR20   |
| WDR23   |
| WDR51A  |
| WNT5A   |



Supplementary Table S5: Gene list related to Hippo pathway.

| Term                                          | %     | PValue   | Genes                                                                                                                     |
|-----------------------------------------------|-------|----------|---------------------------------------------------------------------------------------------------------------------------|
| GO:0005667~transcription factor complex       | 20,51 | 1,63E-06 | SMAD7, TEAD4, SMAD4, SMAD3, LEF1, TEAD2, TEAD3, YAP1                                                                      |
| GO:0044451~nucleoplasm part                   | 23,08 | 1,24E-04 | SMAD7, TEAD4, SMAD4, SMAD3, LEF1, TEAD2, TEAD3, YAP1, PPP1CC                                                              |
| GO:0045177~apical part of cell                | 15,38 | 1,35E-04 | PRKCZ, INADL, PRKCI, CDH1, FZD3, FZD6                                                                                     |
| GO:0005911~cell-cell junction                 | 15,38 | 1,79E-04 | PRKCZ, INADL, SMAD7, AMOT, CDH1, PARD6G                                                                                   |
| GO:0016327~apicolateral plasma membrane       | 12,82 | 1,85E-04 | PRKCZ, INADL, AMOT, PARD6G, FZD6                                                                                          |
| GO:0044459~plasma membrane part               | 41,03 | 4,91E-04 | PRKCZ, INADL, SMAD7, TGFBR2, PRKCI, CDH1, FZD3, ITGB2, FZD2, CTNNA1, FZD6, FRMD6, AMOT, PARD6G, DLG2, BMPR1A              |
| GO:0030054~cell junction                      | 20,51 | 5,17E-04 | PRKCZ, INADL, SMAD7, AMOT, CDH1, PARD6G, CTNNA1, DLG2                                                                     |
| GO:0005923~tight junction                     | 10,26 | 0,0011   | PRKCZ, INADL, AMOT, PARD6G                                                                                                |
| GO:0070160~occluding junction                 | 10,26 | 0,0011   | PRKCZ, INADL, AMOT, PARD6G                                                                                                |
| GO:0005654~nucleoplasm                        | 23,08 | 0,0027   | SMAD7, TEAD4, SMAD4, SMAD3, LEF1, TEAD2, TEAD3, YAP1, PPP1CC                                                              |
| GO:0043296~apical junction complex            | 10,26 | 0,0027   | PRKCZ, INADL, AMOT, PARD6G                                                                                                |
| GO:0015629~actin cytoskeleton                 | 12,82 | 0,0067   | PRKCZ, AMOT, CDH1, CTNNA1, LLGL1                                                                                          |
| GO:0005856~cytoskeleton                       | 25,64 | 0,0124   | PRKCZ, PPP2R1A, YWHAZ, FRMD6, AMOT, CDH1, CTNNA1, DLG2, LATS2, LLGL1                                                      |
| GO:0016342~catenin complex                    | 5,13  | 0,0140   | SMAD7, CDH1                                                                                                               |
| GO:0031012~extracellular matrix               | 12,82 | 0,0156   | WNT4, WNT5B, WNT11, BMP7, WNT6                                                                                            |
| GO:0005886~plasma membrane                    | 46,15 | 0,0188   | PRKCZ, INADL, SMAD7, TGFBR2, PRKCI, SMAD3, CDH1, ITGB2, FZD3, FZD2, CTNNA1, FZD7, FZD6, FRMD6, AMOT, PARD6G, DLG2, BMPR1A |
| GO:0044448~cell cortex part                   | 7,69  | 0,0228   | PRKCZ, PRKCI, LLGL1                                                                                                       |
| GO:0043235~receptor complex                   | 7,69  | 0,0421   | TGFBR2, SMAD3, ITGB2                                                                                                      |
| GO:0031981~nuclear lumen                      | 23,08 | 0,0451   | SMAD7, TEAD4, SMAD4, SMAD3, LEF1, TEAD2, TEAD3, YAP1, PPP1CC                                                              |
| GO:0005578~proteinaceous extracellular matrix | 10,26 | 0,0605   | WNT4, WNT5B, WNT11, WNT6                                                                                                  |
| GO:0045121~membrane raft                      | 7,69  | 0,0611   | PRKCZ, TGFBR2, BMPR1A                                                                                                     |
| GO:0005938~cell cortex                        | 7,69  | 0,0634   | PRKCZ, PRKCI, LLGL1                                                                                                       |
| GO:0005912~adherens junction                  | 7,69  | 0,0704   | SMAD7, CDH1, CTNNA1                                                                                                       |
| GO:0070161~anchoring junction                 | 7,69  | 0,0842   | SMAD7, CDH1, CTNNA1                                                                                                       |
| GO:0005913~cell-cell adherens junction        | 5,13  | 0,0941   | SMAD7, CDH1                                                                                                               |

Supplementary Table S6: Gene lists of the venn diagram Figure 6A.

| he_expr   | hlc_expr | he_expr<br>AND<br>hlc_expr | de_expr   | he_expr<br>AND<br>de_expr | hlc_expr<br>AND<br>de_expr | he_expr<br>AND<br>hlc_expr<br>AND<br>de_expr |
|-----------|----------|----------------------------|-----------|---------------------------|----------------------------|----------------------------------------------|
| ABCC6P2   | A4GNT    | A1CF                       | ABCG4     | ABCC1                     | AADAACL4                   | A2LD1                                        |
| ADAM12    | AADAC    | ABCC2                      | ABI3      | ACCN2                     | ABAT                       | A2ML1                                        |
| ADC       | ABCA5    | ACADL                      | ACADSB    | ADAM23                    | ABCA11                     | A4GALT                                       |
| ADPRHL1   | ABCA8    | ACCN3                      | ACAP1     | ADAMTSL3                  | ABCA2                      | AAAS                                         |
| AMBN      | ABCA9    | ADAT2                      | ACPT      | ADD2                      | ABCA4                      | AACS                                         |
| APBB2     | ABCB4    | ADRA1B                     | ACSBG1    | ADRB2                     | ABCC6                      | AACSL                                        |
| ARFIP2    | ABCC6P1  | AFAP1L1                    | ACSM4     | AGR3                      | ABCC9                      | AADAACL1                                     |
| ARL6      | ACRV1    | AFF2                       | ACTN3     | AMPH                      | ABCD1                      | AADAT                                        |
| BCL2A1    | ACSL5    | AGT                        | ACVRL1    | ANAPC7                    | ABCG2                      | AAGAB                                        |
| BOLL      | ACSS1    | AKR1B10                    | ADAMTS8   | ANK2                      | ACE2                       | AAK1                                         |
| C10orf112 | ADAMTS2  | AKR1B15                    | ADRA2C    | AOAH                      | ACTG2                      | AAMP                                         |
| C11orf65  | ADAMTS20 | ALDH1L1                    | AGER      | APBB1                     | ADAM2                      | AARS                                         |
| C13orf33  | ADAMTSL1 | ALDH3B2                    | AGXT2L1   | APCDD1                    | ADAM8                      | AARS2                                        |
| C14orf165 | ADCY4    | ALG10                      | ALDOB     | ARRB2                     | ADAMTS7                    | AARSD1                                       |
| C19orf57  | ADH1A    | ALG2                       | ANK1      | ASB9                      | ADAMTSL5                   | AASDH                                        |
| C1orf103  | ADRA1A   | AMAC1L2                    | ANKRD19   | ASCL2                     | AFF3                       | AASDHPPT                                     |
| C1orf182  | AFM      | AMDHD1                     | ANKRD55   | ASPHD1                    | AGPAT9                     | AASS                                         |
| C2        | AGMAT    | AMY2A                      | ANKRD58   | ATOH7                     | AKAP2                      | AATF                                         |
| C21orf34  | AGPAT3   | ANKRD43                    | ANO4      | ATP1B2                    | ALDH1A2                    | AATK                                         |
| C3orf57   | AHSG     | ANXA4                      | ANO7      | ATP6V0D2                  | ALPPL2                     | ABCA1                                        |
| C4orf36   | AIFM2    | ANXA8                      | AOX1      | B3GAT1                    | ALS2CR16                   | ABCA3                                        |
| C4orf47   | ALMS1P   | ANXA8L1                    | ARHGEF4   | B3GNT4                    | AMH                        | ABCA7                                        |
| C5orf38   | ALOX15   | ANXA9                      | ARNTL2    | BARX1                     | ANAPC2                     | ABCB10                                       |
| C5orf43   | ALOX5AP  | APOB                       | ARTN      | BCAS3                     | ANGPT2                     | ABCB6                                        |
| C7orf46   | ALPI     | APOC3                      | ARVCF     | BCL10                     | ANKRD23                    | ABCB7                                        |
| C7orf51   | AMY2B    | APOL2                      | ATOH8     | BCL6B                     | ANKRD36                    | ABCB9                                        |
| C8orf79   | ANKS4B   | AQP3                       | ATP1A2    | BEST4                     | ANKRD41                    | ABCC10                                       |
| CACNA1S   | ANP32E   | ARHGAP18                   | ATP2B3    | BFSP1                     | ANO1                       | ABCC3                                        |
| CALCA     | ANXA8L2  | ARHGAP8                    | ATP8B3    | BOLA2B                    | APCDD1L                    | ABCC4                                        |
| CASC1     | APLF     | ARNTL                      | B3GALT5   | BSPH1                     | APOBEC3B                   | ABCC5                                        |
| CBLN1     | AQP1     | ARRDC4                     | BAI1      | BTBD11                    | APOF                       | ABCD3                                        |
| CD69      | AQP10    | ASCL5                      | BAZ2A     | BZW1                      | AQP7P1                     | ABCE1                                        |
| CDYL2     | ARAP2    | ATP10B                     | BDKRB2    | C12orf28                  | AQP7P2                     | ABCF1                                        |
| CHRD12    | ARHGAP20 | ATP2A3                     | BHLHE22   | C12orf34                  | ARHGAP11B                  | ABCF2                                        |
| CLGN      | ARHGAP29 | ATP2C2                     | BRDT      | C12orf56                  | ARVP6125                   | ABCF3                                        |
| COL21A1   | ARHGAP30 | ATP6V1C2                   | BREA2     | C14orf101                 | ASAP1IT1                   | ABCG1                                        |
| CPSF4L    | ARHGAP6  | ATP7A                      | BTBD9     | C14orf11                  | ATF6B                      | ABHD10                                       |
| CR2       | ARPM1    | ATP8B1                     | C10orf85  | C14orf115                 | ATG2B                      | ABHD11                                       |
| CRYBB2    | ARRDC1   | AURKAPS1                   | C10orf96  | C14orf65                  | ATP13A3                    | ABHD12                                       |
| CUZD1     | ART4     | BACH1                      | C12orf36  | C15orf34                  | ATP8B4                     | ABHD12B                                      |
| CXorf18   | ASGR2    | BCAM                       | C12orf73  | C16orf45                  | ATRX                       | ABHD14A                                      |
| CXorf48   | BAI2     | BEND6                      | C14orf121 | C17orf93                  | B3GNT3                     | ABHD15                                       |
| CXorf56   | BCAR4    | C10orf10                   | C14orf21  | C19orf4                   | B3GNT5                     | ABHD2                                        |
| DAZ2      | BCMO1    | C10orf65                   | C14orf72  | C1orf51                   | BAALC                      | ABHD3                                        |

|             |           |           |           |          |           |        |
|-------------|-----------|-----------|-----------|----------|-----------|--------|
| DAZ4        | BNC1      | C10orf73  | C16orf11  | C20orf54 | BATF3     | ABHD4  |
| DHODH       | BRUNOL6   | C11orf36  | C16orf69  | C21orf63 | BCAN      | ABHD5  |
| DKFZp547K05 | C10orf128 | C11orf52  | C17orf67  | C2CD4C   | BDP1      | ABHD6  |
| DKFZP564J10 | C10orf41  | C11orf71  | C17orf76  | C3orf54  | BOC       | ABHD7  |
| DLX6        | C10orf54  | C17orf75  | C19orf51  | C3orf71  | BRD4      | ABHD8  |
| DLX6AS      | C12orf27  | C18orf19  | C1orf222  | C5orf45  | BTK       | ABHD9  |
| DNAI1       | C13orf31  | C18orf2   | C1orf94   | C6orf126 | BTN3A2    | ABI1   |
| DNTT        | C15orf48  | C19orf69  | C1QL1     | C8orf13  | C10orf39  | ABI2   |
| DYNC1L1     | C16orf54  | C1orf105  | C1QL4     | C9orf125 | C14orf176 | ABL1   |
| EBF3        | C16orf55  | C1orf161  | C1QTNF4   | C9orf129 | C15orf59  | ABL2   |
| EDIL3       | C17orf74  | C1orf177  | C20orf112 | C9orf24  | C17orf108 | ABLIM1 |
| EEFSEC      | C17orf82  | C1orf189  | C20orf62  | CA12     | C19orf66  | ABR    |
| EMR4        | C19orf21  | C1orf213  | C2CD4B    | CADPS    | C19orf71  | ABT1   |
| EN2         | C1orf170  | C1orf64   | C2orf48   | CAMK1    | C1orf95   | ABTB1  |
| EPS8L2      | C1orf188  | C20orf151 | C2orf78   | CAMK1D   | C1QA      | ABTB2  |
| EPS8L3      | C1orf210  | C2orf67   | C2orf80   | CAMKV    | C1QTNF5   | ACAA1  |
| EREG        | C1orf215  | C3orf60   | C3orf32   | CAPN9    | C21orf128 | ACAA2  |
| ERVK6       | C1orf229  | C4orf16   | C3orf35   | CCDC4    | C4orf38   | ACACA  |
| EXOG        | C1orf81   | C4orf19   | C3orf51   | CCDC88A  | C4orf39   | ACACB  |
| FA2H        | C1QTNF1   | C4orf32   | C4orf11   | CCL26    | C6orf204  | ACAD10 |
| FAM153A     | C21orf119 | C6orf100  | C5orf20   | CD2      | C6orf25   | ACAD11 |
| FAM155B     | C21orf49  | C8orf47   | C7orf57   | CD200    | C6orf81   | ACAD8  |
| FAM178B     | C2orf54   | C8orf51   | C8orf15   | CD3EAP   | C8orf16   | ACAD9  |
| FAM187B     | C3orf15   | C9orf164  | C8orf30B  | CD7      | C8orf44   | ACADM  |
| FAM46D      | C3orf36   | C9orf66   | C8orf34   | CDA      | C9orf3    | ACADS  |
| FAM47E      | C3orf62   | CACNG1    | C8orf77   | CDH20    | CA8       | ACADVL |
| FANK1       | C3orf70   | CASQ2     | C8orf80   | CDK5R2   | CACNA2D3  | ACAP2  |
| FBXO25      | C5orf23   | CBX8      | C8ORFK29  | CER1     | CALCR     | ACAT1  |
| FGFBP1      | C5orf27   | CCBP2     | CA10      | CHGA     | CAMK1G    | ACAT2  |
| FGFR1       | C6orf199  | CCDC126   | CA5BP     | CHRN4    | CAPN14    | ACBD3  |
| FLJ22447    | C6orf208  | CCDC57    | CACNA1D   | CHST4    | CCDC147   | ACBD4  |
| FLJ23865    | C6orf221  | CCDC68    | CACNA1I   | CHST6    | CCDC17    | ACBD6  |
| FLJ36032    | C7orf53   | CD163     | CADM3     | CHST8    | CCDC35    | ACBD7  |
| FLJ36848    | C8orf4    | CDK8      | CAMK2B    | CLEC4D   | CCNJ      | ACCS   |
| FLJ37512    | C9orf62   | CEACAM21  | CAMKK1    | CNIH3    | CDH26     | ACD    |
| FLJ40330    | CA3       | CECR4     | CAPN10    | COL9A1   | CDKN2B    | ACER2  |
| FLJ44450    | CACNG4    | CFB       | CAPN11    | COX11P   | CDKN2C    | ACER3  |
| FLJ90036    | CADM2     | CFC1B     | CBY3      | CPNE4    | CEACAM1   | ACHE   |
| FOXJ1       | CAMTA2    | CFH       | CCDC141   | CPT1C    | CGA       | ACIN1  |
| FXYD4       | CAPN3     | CFHR3     | CCDC19    | CSAG1    | CGB1      | ACLY   |
| G0S2        | CASP4     | CHGB      | CCDC36    | CTSF     | CHST1     | ACN9   |
| GAGE12H     | CCDC146   | CHTF8     | CCDC74A   | CUX2     | CKMT2     | ACO1   |
| GAS2        | CCDC149   | CIDEB     | CCDC81    | DBF4     | CLSTN2    | ACO2   |
| GCNT6       | CCDC153   | CIDECF    | CCL8      | DCX      | CNR1      | ACOT1  |
| GDAP1L1     | CCDC33    | CLDN9     | CD163L1   | DDX25    | COL20A1   | ACOT11 |
| GDEP        | CCDC96    | CPEB4     | CD164L2   | DDX6     | CORO6     | ACOT2  |
| GNAT1       | CCR7      | CPN1      | CD3G      | DEPDC7   | CPPED1    | ACOT4  |
| GPR112      | CD247     | CRH       | CD48      | DGCR5    | CRIM1     | ACOT7  |
| GPR150      | CD302     | CROCCL1   | CD70      | DNAJC11  | CRLF1     | ACOT8  |
| GSDM1       | CD84      | CRYBA1    | CDC14C    | DNAJC12  | CROCCL2   | ACOT9  |

|             |         |              |             |          |             |          |
|-------------|---------|--------------|-------------|----------|-------------|----------|
| GTF2H2      | CDGAP   | CSGALNACT1   | CDH12       | DOCK5    | CRYBA2      | ACOX1    |
| GTSF1       | CDH17   | CSNK1A1L     | CDH4        | DOK1     | CSDC2       | ACOX2    |
| HCG18       | CDH5    | CTSE         | CECR2       | DPY19L3  | CSF3R       | ACOX3    |
| HCK         | CDH8    | CTSO         | CELP        | DUSP26   | CTAGE5      | ACP1     |
| HGD         | CDKN2A  | CXorf21      | CHADL       | DZIP1    | CTGLF1      | ACP2     |
| HGSNAT      | CDNF    | CYP46A1      | CHRNA10     | ECAT8    | CXCL1       | ACP6     |
| HIST1H2AM   | CDY1B   | DALRD3       | CHST11      | EDA      | CYP2D7P1    | ACPL2    |
| HIST1H3G    | CEACAM6 | DDC          | CIT         | EFCBP1   | DDX26B      | ACPP     |
| HIST1H4I    | CEND1   | DHFR         | CLUL1       | FABP5L3  | DEFB1       | ACRC     |
| HIST2H2BF   | CEP170  | DIRAS2       | CMTM1       | FAM124A  | DEFB116     | ACSF2    |
| HYALP1      | CGB     | DIRAS3       | CNN1        | FAM133A  | DEFB123     | ACSL1    |
| ICA1L       | CGB5    | DMRT2        | CNNM1       | FAM167A  | DENND3      | ACSL3    |
| ICF45       | CGB7    | DMXL2        | CNTNAP3     | FAM179A  | DKFZP434L18 | ACSL4    |
| IFI44       | CGB8    | DNAJB4       | CNTNAP3B    | FAM59B   | DKFZp686E24 | ACSM3    |
| IL15RA      | CHRD    | DNAJC22      | COL27A1     | FAM80A   | DNHL1       | ACSS2    |
| INSRR       | CHRNA2  | DNAJC25-GNCG | COL29A1     | FANCF    | DPY19L2P2   | ACSS3    |
| IRF2        | CHRNE   | DOK5         | COL6A6      | FAT4     | DQX1        | ACTA1    |
| ISL2        | CIDEA   | DOK6         | COL8A1      | FCN3     | DST         | ACTA2    |
| JARID1C     | CIDEC   | DPEP1        | CORO1A      | FGF12    | DZIP3       | ACTB     |
| JMJD7       | CILP    | DPYS         | CORO2B      | FGF19    | EBI3        | ACTC1    |
| KCNH2       | CLDN18  | DUSP27       | COX7A1      | FLJ10324 | ECM1        | ACTG1    |
| KERA        | CLEC18C | DUSP9        | CRYGD       | FLJ25404 | EGF         | ACTL6A   |
| KIAA0692    | CLEC1A  | DUX4         | CSF2        | FLJ40125 | ELOVL2      | ACTN1    |
| KIAA1324    | CLEC2B  | EDA2R        | CSMD2       | FLJ44379 | EMX1        | ACTN4    |
| KIAA1345    | CLEC2L  | EGFL6        | CSPG4       | FOXD4    | ERP44       | ACTR10   |
| KILLIN      | CLIC3   | EHHADH       | CST2        | FOXI2    | ETV2        | ACTR1A   |
| KLHL14      | CNNM2   | EIF4E1B      | CUGBP2      | FPR1     | EVI1        | ACTR1B   |
| KLRC1       | CNTN4   | ELF5         | CXCL11      | FRAT1    | EZH1        | ACTR2    |
| LCE1B       | COL15A1 | ELMOD1       | CXCL6       | FRMD5    | FAM101A     | ACTR3    |
| LNP1        | COLEC11 | ELP2P        | CXCR1       | FZD9     | FAM183A     | ACTR3B   |
| LOC10012788 | COX18   | EMR2         | CXCR4       | GABRA5   | FAM21A      | ACTR5    |
| LOC10012801 | CPA4    | ENTPD1       | CXorf27     | GAL3ST3  | FAM90A6P    | ACTR6    |
| LOC10012815 | CPAMD8  | EPN3         | CYP2A13     | GAP43    | FAM91A1     | ACTR8    |
| LOC10012820 | CPLX2   | EPO          | CYSLTR2     | GDPD4    | FBLN7       | ACTRT1   |
| LOC10012829 | CPNE2   | ERBB2IP      | DACH2       | GEMIN7   | FCGBP       | ACVR1    |
| LOC10012836 | CRCT1   | ERCC6        | DDN         | GFRA3    | FGD4        | ACVR1B   |
| LOC10012852 | CREB3L3 | ETHE1        | DDX20       | GGT2     | FLCN        | ACVR2A   |
| LOC10012859 | CRISP2  | EXOC8        | DEFB125     | GK       | FLI1        | ACVR2B   |
| LOC10012888 | CRTC1   | F2           | DGKB        | GLI1     | FLJ10088    | ACY1     |
| LOC10012905 | CRYAB   | F7           | DHRS9       | GLI2     | FLJ10246    | ACYP1    |
| LOC10012911 | CSF1R   | FALZ         | DIRAS1      | GLIPR1L1 | FLJ11292    | ACYP2    |
| LOC10012926 | CSN1S1  | FAM151A      | DIS3        | GLT25D2  | FLJ21986    | ADA      |
| LOC10012943 | CST6    | FAM176A      | DISC1       | GNA14    | FLJ23152    | ADAL     |
| LOC10012944 | CUBN    | FAM188B      | DISP2       | GPR101   | FLJ26850    | ADAM10   |
| LOC10013008 | CXCR6   | FAM76A       | DKFZp761E19 | GPR146   | FLJ35258    | ADAM15   |
| LOC10013018 | CYP19A1 | FARP2        | DKK4        | GPR182   | FLJ37078    | ADAM17   |
| LOC10013032 | CYP1A1  | FBXL21       | DMRTA2      | GPR55    | FLJ41484    | ADAM19   |
| LOC10013050 | CYP26B1 | FBXL3        | DNAJC16     | GPR83    | FLJ45513    | ADAM9    |
| LOC10013065 | CYP3A7  | FBXO4        | DNM1        | GRIA3    | FOSB        | ADAMTS1  |
| LOC10013099 | CYP4V2  | FCRLB        | DNM3        | GRM4     | FOXF1       | ADAMTS18 |



|             |             |           |          |             |           |          |
|-------------|-------------|-----------|----------|-------------|-----------|----------|
| LOC10013125 | DCAF4L1     | FGB       | DOC2A    | GRM8        | FOXL2     | ADAMTS19 |
| LOC10013128 | DCDC2       | FGG       | DOK7     | HBS1L       | GABBR2    | ADAMTS3  |
| LOC10013148 | DCLK2       | FIGN      | DPF1     | HDAC5       | GAS2L1    | ADAMTS6  |
| LOC10013169 | DDX60       | FLJ27354  | DRD3     | HHLA2       | GBP2      | ADAMTS9  |
| LOC10013170 | DEFA6       | FLJ33630  | DYRK3    | HIST1H1D    | GGT7      | ADAMTSL2 |
| LOC10013174 | DHH         | FLJ35429  | EBF2     | HIST1H1E    | GHRHR     | ADAMTSL4 |
| LOC10013196 | DHRS4L1     | FLJ37644  | EBI2     | HIST1H4J    | GLCCI1    | ADAP2    |
| LOC10013196 | DIO1        | FLJ41200  | ECE1     | HLA-DMB     | GMFG      | ADAR     |
| LOC10013196 | DKFZp434M1  | FLJ46838  | ECEL1    | HLA-DPB2    | GNB3      | ADARB1   |
| LOC10013198 | DKFZp686J05 | FMO1      | ECSCR    | HMGB3L1     | GOLGA8E   | ADAT1    |
| LOC10013228 | DKFZp779L18 | FN1       | ELAVL3   | HMP19       | GP6       | ADAT3    |
| LOC10013236 | DLC1        | FOLH1     | ELAVL4   | HOXD3       | GPBAR1    | ADCK1    |
| LOC10013255 | DLG1        | FOXE3     | ESRRB    | HR          | GPD2      | ADCK2    |
| LOC10013264 | DLX1        | FOXI3     | F8       | HRC         | GPR124    | ADCK4    |
| LOC10013273 | DMPK        | FTCD      | FAM101B  | HSPC047     | GRAMD2    | ADCK5    |
| LOC10013288 | DMRT1       | GAGE2B    | FAM124B  | HTR3A       | GREM1     | ADCY1    |
| LOC10013289 | DNHD1       | GATA5     | FAM13AOS | ICAM4       | GRK4      | ADCY3    |
| LOC10013293 | DOCK9       | GCM1      | FAM150B  | IFT81       | GTPBP5    | ADCY6    |
| LOC10013295 | DPRXP4      | GHDC      | FAM159A  | IGSF9B      | GUCY2C    | ADCY7    |
| LOC10013297 | DSC1        | GIN1      | FAM159B  | IL1RAPL1    | GVIN1     | ADCY9    |
| LOC10013346 | DSCR4       | GJA3      | FAM169A  | IL2RB       | HDAC8     | ADD1     |
| LOC10013347 | DTX3L       | GJB1      | FAM43B   | IL3RA       | HEMK1     | ADD3     |
| LOC10013369 | DUOX1       | GJB2      | FAM53A   | INHBB       | HES2      | ADH5     |
| LOC10013371 | DUOX2       | GLRB      | FAM57B   | JAKMIP2     | HIF3A     | ADHFE1   |
| LOC10013402 | DUOXA2      | GLUD2     | FAM62C   | KCND2       | HIP1R     | ADI1     |
| LOC10013403 | DUSP5P      | GLUL      | FAM65C   | KCNG3       | HIRA      | ADIPOR1  |
| LOC10013406 | DYNLRB2     | GNAQ      | FAM71F1  | KCTD8       | HIST1H2BC | ADIPOR2  |
| LOC10013417 | EFCAB3      | GOLGA7B   | FAM78B   | KIAA1086    | HIST1H2BE | ADK      |
| LOC10013422 | EFHA2       | GOLSYN    | FAM90A1  | KIAA1409    | HMGA2     | ADM      |
| LOC10013426 | EGR2        | GPC5      | FANCA    | KIF13A      | HP1BP3    | ADM2     |
| LOC10013433 | ELAC1       | GPR156    | FBN1     | KLHL25      | HPDL      | ADNP     |
| LOC10013459 | ELOVL3      | GPRC5A    | FBXL17   | KLHL33      | HSD11B2   | ADNP2    |
| LOC10013471 | ELOVL7      | GRAMD1C   | FBXL19   | KLKB1       | HSN2      | ADO      |
| LOC10013471 | EMX2        | GRHL1     | FCHO1    | KRT126P     | HTR2A     | ADORA1   |
| LOC10013482 | ENOX1       | GRHL3     | FCN1     | LCK         | HTRA4     | ADORA2A  |
| LOC121838   | ERAP1       | GSK3A     | FCRL5    | LEFTY1      | IFIT2     | ADORA2B  |
| LOC133874   | ERAP2       | GSTA1     | FERMT3   | LGALS12     | IFT57     | ADPGK    |
| LOC138864   | ESM1        | GSTA2     | FEZF2    | LHFPL4      | IGF1R     | ADPRH    |
| LOC149351   | ETAA1       | GSTA5     | FGF17    | LHX6        | IL1RAP    | ADPRHL2  |
| LOC150223   | EXD3        | GTF2IRD2P | FGF8     | LOC10012837 | IL6       | ADRA2A   |
| LOC150759   | EXOD1       | GULP1     | FGFBP3   | LOC10012847 | IRF8      | ADRA2B   |
| LOC196993   | F8A3        | HAAO      | FLJ20581 | LOC10012907 | ITGA1     | ADRBK1   |
| LOC220930   | FAM123B     | HCN4      | FLJ21839 | LOC10012919 | ITGAM     | ADRM1    |
| LOC284276   | FAM22D      | HEXIM1    | FLJ23754 | LOC10012960 | KCNK7     | ADSL     |
| LOC284293   | FAM23B      | HEYL      | FLJ27365 | LOC10013017 | KIAA0226  | ADSS     |
| LOC285216   | FAM55C      | HHAT      | FLJ27465 | LOC10013028 | KIAA0284  | ADSSL1   |
| LOC285548   | FBXO9       | HIST1H2AC | FLJ30430 | LOC10013045 | KIAA1024  | AEBP1    |
| LOC340529   | FCGR2A      | HIST1H2BG | FLJ36144 | LOC10013082 | KIAA1202  | AEBP2    |
| LOC360030   | FER1L5      | HIST1H4H  | FLJ39632 | LOC10013093 | KIAA1875  | AEN      |
| LOC389124   | FGD2        | HLA-DPA1  | FLJ40194 | LOC10013094 | KIF27     | AES      |

|           |           |             |          |             |             |         |
|-----------|-----------|-------------|----------|-------------|-------------|---------|
| LOC389458 | FLJ13197  | HMGCS2      | FLJ40473 | LOC10013122 | KLC3        | AFAP1   |
| LOC390282 | FLJ16779  | HNF1A       | FLJ45422 | LOC10013126 | KLK7        | AFAP1L2 |
| LOC390712 | FLJ22639  | HOXA2       | FLJ45445 | LOC10013147 | KRT18P34    | AFF1    |
| LOC392781 | FLJ22675  | HPX         | FLJ90231 | LOC10013172 | LAMB3       | AFF4    |
| LOC393076 | FLJ35776  | HS6ST1      | FMN2     | LOC10013173 | LCAT        | AFG3L1  |
| LOC401233 | FLJ37786  | HSD17B2     | FOXF2    | LOC10013189 | LIF         | AFG3L2  |
| LOC402571 | FLJ38773  | HSD17B7P2   | FOXO6    | LOC10013234 | LMBR1L      | AFMID   |
| LOC440131 | FLJ41327  | HSD3B7      | FOXP3    | LOC10013266 | LOC10004971 | AFP     |
| LOC440181 | FLJ41941  | HSPA1L      | FPGS     | LOC10013283 | LOC10012791 | AFTPH   |
| LOC440330 | FLJ44313  | ID4         | FRMPD4   | LOC10013293 | LOC10012792 | AGA     |
| LOC440577 | FLJ45983  | IGF1        | FSHR     | LOC10013303 | LOC10012835 | AGAP3   |
| LOC441007 | FOXR1     | IGF2        | FSTL4    | LOC10013324 | LOC10012851 | AGAP6   |
| LOC441054 | FRMD3     | IL21R       | FSTL5    | LOC10013331 | LOC10012852 | AGAP8   |
| LOC441487 | FRMD7     | INSR        | FUSSEL18 | LOC10013340 | LOC10012854 | AGBL5   |
| LOC441714 | FXYD2     | ISM1        | FZD10    | LOC10013343 | LOC10012859 | AGFG1   |
| LOC441957 | FYB       | ISM2        | GAFA2    | LOC10013391 | LOC10012872 | AGFG2   |
| LOC442726 | GABRB1    | ITGA7       | GALNT13  | LOC10013415 | LOC10012881 | AGGF1   |
| LOC541471 | GAGE12E   | ITPKA       | GGT1     | LOC10013417 | LOC10012890 | AGK     |
| LOC541472 | GAGE4     | ITPR1       | GH1      | LOC10013420 | LOC10012906 | AGL     |
| LOC553137 | GALIG     | JRK         | GH2      | LOC10013478 | LOC10012909 | AGPAT1  |
| LOC641788 | GARNL3    | KBTBD3      | GHRLOS   | LOC10013481 | LOC10012930 | AGPAT2  |
| LOC641806 | GBAP      | KCNAB2      | GIGYF1   | LOC127099   | LOC10012936 | AGPAT4  |
| LOC642113 | GBP1      | KCTD18      | GJA4     | LOC220115   | LOC10012938 | AGPAT5  |
| LOC642420 | GCKR      | KIAA0251    | GKN2     | LOC283314   | LOC10012954 | AGPAT6  |
| LOC642615 | GCNT3     | KIAA1045    | GLB1L3   | LOC284998   | LOC10012957 | AGPS    |
| LOC642660 | GDF6      | KIAA1199    | GLT1D1   | LOC285141   | LOC10012958 | AGR2    |
| LOC642675 | GEFT      | KIAA1772    | GLYATL1  | LOC285407   | LOC10012967 | AGRN    |
| LOC643236 | GIN51     | KISS1R      | GNAL     | LOC285412   | LOC10012972 | AGTPBP1 |
| LOC643304 | GJA5      | KLF10       | GNASAS   | LOC339782   | LOC10013009 | AGTRAP  |
| LOC643731 | GJB6      | KLF3        | GNAZ     | LOC374491   | LOC10013041 | AGXT2L2 |
| LOC643853 | GJB7      | KLK8        | GPR172B  | LOC388755   | LOC10013052 | AHCTF1  |
| LOC643896 | GNGT2     | KNCN        | GPR176   | LOC389895   | LOC10013090 | AHCY    |
| LOC643959 | GPR61     | KRR1        | GRAP     | LOC391764   | LOC10013092 | AHCYL1  |
| LOC644006 | GPR87     | KRT7        | GRIK5    | LOC400174   | LOC10013095 | AHCYL2  |
| LOC644558 | GSTA3     | KRT80       | GRIN2C   | LOC400406   | LOC10013101 | AHDC1   |
| LOC644573 | GSTM3     | KRTAP21-2   | GRM3     | LOC440386   | LOC10013116 | AHI1    |
| LOC644584 | HAPLN3    | KYNU        | GRP      | LOC440925   | LOC10013117 | AHNAK   |
| LOC644589 | HCG27     | LDHC        | GRRP1    | LOC441081   | LOC10013125 | AHNAK2  |
| LOC644596 | HDX       | LGR4        | GSC      | LOC441511   | LOC10013127 | AHR     |
| LOC644715 | HERV-FRD  | LMO1        | GSTT2    | LOC442308   | LOC10013128 | AHSA1   |
| LOC644766 | HIST1H2AG | LOC10012800 | GUCA2A   | LOC474170   | LOC10013132 | AHSA2   |
| LOC644999 | HIST1H3D  | LOC10012808 | GYPB     | LOC493754   | LOC10013136 | AHSP    |
| LOC645084 | HKDC1     | LOC10012820 | GYPE     | LOC641941   | LOC10013144 | AIDA    |
| LOC645249 | HOXB3     | LOC10012865 | HCLS1    | LOC642280   | LOC10013164 | AIF1    |
| LOC645284 | HOXC4     | LOC10012882 | HCRTR2   | LOC642341   | LOC10013172 | AIF1L   |
| LOC645314 | HPD       | LOC10012910 | HDC      | LOC642342   | LOC10013215 | AIFM1   |
| LOC645323 | HSD17B1   | LOC10012912 | HELB     | LOC643669   | LOC10013226 | AIG1    |
| LOC645620 | HSD3B1    | LOC10012929 | HHEX     | LOC643719   | LOC10013228 | AIM1    |
| LOC645944 | HSF2BP    | LOC10012941 | HHLA1    | LOC643912   | LOC10013247 | AIM1L   |
| LOC646191 | HSPA6     | LOC10012950 | HIST1H3J | LOC643932   | LOC10013252 | AIM2    |

|           |           |             |             |           |             |          |
|-----------|-----------|-------------|-------------|-----------|-------------|----------|
| LOC646330 | HSPB7     | LOC10012963 | HP          | LOC644451 | LOC10013294 | AIMP2    |
| LOC646346 | HSPG2     | LOC10012965 | HRASLS2     | LOC644738 | LOC10013296 | AIP      |
| LOC646372 | IAPP      | LOC10012967 | HRES1       | LOC645682 | LOC10013342 | AIRE     |
| LOC646697 | ICAM1     | LOC10012970 | HRIHFB2122  | LOC645733 | LOC10013362 | AJAP1    |
| LOC646938 | IFIH1     | LOC10012996 | HSFYP1      | LOC646438 | LOC10013374 | AK1      |
| LOC647083 | IFIT3     | LOC10012998 | IFI30       | LOC646869 | LOC10013376 | AK2      |
| LOC647274 | IFIT5     | LOC10013021 | IGSF21      | LOC647042 | LOC10013379 | AK2P2    |
| LOC647328 | IFNE      | LOC10013025 | IL15        | LOC647439 | LOC10013384 | AK3      |
| LOC647588 | IGFBP1    | LOC10013054 | IL20        | LOC647570 | LOC10013439 | AK3L1    |
| LOC647592 | IGFBPL1   | LOC10013055 | IL34        | LOC648377 | LOC10013443 | AKAP1    |
| LOC647630 | IL17C     | LOC10013055 | IL8RB       | LOC649023 | LOC10013458 | AKAP10   |
| LOC647841 | IL18R1    | LOC10013093 | IMPG2       | LOC649305 | LOC10013466 | AKAP11   |
| LOC648863 | IL1R1     | LOC10013096 | INDO        | LOC650132 | LOC10013470 | AKAP12   |
| LOC649571 | IL1R2     | LOC10013108 | IRAK3       | LOC652051 | LOC10017093 | AKAP13   |
| LOC650251 | IL20RA    | LOC10013112 | ITGA2B      | LOC652790 | LOC152586   | AKAP7    |
| LOC650418 | IL32      | LOC10013136 | ITIH2       | LOC653075 | LOC282997   | AKAP8    |
| LOC650509 | INHHA     | LOC10013157 | ITK         | LOC653337 | LOC283332   | AKAP8L   |
| LOC650867 | INSL4     | LOC10013170 | ITPRIPL1    | LOC653895 | LOC284648   | AKIRIN1  |
| LOC651212 | ITGA10    | LOC10013171 | JMJD2A      | LOC653907 | LOC286002   | AKIRIN2  |
| LOC652140 | ITGA8     | LOC10013189 | KCNB1       | LOC654053 | LOC338963   | AKNA     |
| LOC652300 | ITGB6     | LOC10013193 | KCNH3       | LOC727751 | LOC339047   | AKR1A1   |
| LOC652346 | ITIH1     | LOC10013206 | KCNIP3      | LOC727815 | LOC341689   | AKR1B1   |
| LOC652657 | JCLN      | LOC10013229 | KCNRG       | LOC728288 | LOC388282   | AKR1C2   |
| LOC652670 | KBTBD10   | LOC10013235 | KIAA0853    | LOC728522 | LOC388458   | AKR1C3   |
| LOC652773 | KC6       | LOC10013239 | KIAA0953    | LOC728729 | LOC388630   | AKR1C4   |
| LOC653189 | KCNJ14    | LOC10013256 | KIAA1644    | LOC728887 | LOC389634   | AKR1D1   |
| LOC653284 | KCNK9     | LOC10013277 | KIF17       | LOC728927 | LOC389641   | AKR7A2   |
| LOC653303 | KCNQ4     | LOC10013290 | KIF21B      | LOC729264 | LOC390940   | AKR7A3   |
| LOC653423 | KHK       | LOC10013291 | KIF6        | LOC729350 | LOC391429   | AKT1     |
| LOC653515 | KIAA0258  | LOC10013303 | KIRREL2     | LOC729378 | LOC392713   | AKT1S1   |
| LOC654042 | KIAA1407  | LOC10013307 | KLF1        | LOC729581 | LOC399959   | AKT3     |
| LOC654264 | KIAA1683  | LOC10013308 | KLF7        | LOC729732 | LOC400955   | AKTIP    |
| LOC727831 | KIAA1908  | LOC10013322 | KLHL35      | LOC730063 | LOC400986   | ALAD     |
| LOC727849 | KIFC3     | LOC10013405 | KLHL4       | LOC730100 | LOC401007   | ALAS1    |
| LOC727869 | KLHDC10   | LOC10013425 | KRT3        | LOC730385 | LOC401052   | ALB      |
| LOC728599 | KLK11     | LOC10013436 | L3MBTL4     | LOC732445 | LOC401252   | ALCAM    |
| LOC728612 | KLK3      | LOC10013444 | LAG3        | LOC96610  | LOC401622   | ALDH16A1 |
| LOC728934 | KRBA2     | LOC10013449 | LAMA3       | LPAR4     | LOC441124   | ALDH18A1 |
| LOC728945 | KRT17     | LOC10013455 | LAT         | LRAT      | LOC441193   | ALDH1A1  |
| LOC729113 | KRT23     | LOC10013462 | LDHD        | LRIG3     | LOC441251   | ALDH1A3  |
| LOC729562 | KRTAP19-6 | LOC10013470 | LGI1        | LRP12     | LOC441737   | ALDH1B1  |
| LOC729623 | KRTAP4-8  | LOC124216   | LGI4        | LRRC26    | LOC442041   | ALDH1L2  |
| LOC729652 | KSR1      | LOC146909   | LHFPL5      | LYPD2     | LOC442249   | ALDH2    |
| LOC729905 | LCORL     | LOC148137   | LHX1        | LYPLA2P1  | LOC554208   | ALDH3A2  |
| LOC730058 | LGALS13   | LOC154761   | LHX2        | LZTS1     | LOC641819   | ALDH4A1  |
| LOC730268 | LHB       | LOC155100   | LILRB5      | MALL      | LOC641983   | ALDH5A1  |
| LOC730474 | LIG4      | LOC158572   | LIMD2       | MAP2K6    | LOC642325   | ALDH6A1  |
| LOC730964 | LIPC      | LOC283849   | LMO3        | MAP3K15   | LOC642377   | ALDH7A1  |
| LOC731074 | LMF1      | LOC283922   | LMO7        | MAPK12    | LOC642809   | ALDH8A1  |
| LOC731075 | LMOD1     | LOC284422   | LOC10009363 | MAPK11P1L | LOC642838   | ALDH9A1  |

|            |             |           |             |          |           |          |
|------------|-------------|-----------|-------------|----------|-----------|----------|
| LOC731432  | LNK1        | LOC285733 | LOC10012788 | MAST1    | LOC642995 | ALDOA    |
| LOC732432  | LOC10012826 | LOC286135 | LOC10012791 | MAZ      | LOC643109 | ALDOC    |
| LOC85391   | LOC10012830 | LOC339799 | LOC10012794 | MESP1    | LOC643187 | ALG1     |
| LPPR1      | LOC10012847 | LOC340274 | LOC10012795 | MGAT4C   | LOC643373 | ALG10B   |
| LRRC3B     | LOC10012867 | LOC344328 | LOC10012809 | MIR1224  | LOC643396 | ALG11    |
| LRRC4C     | LOC10012876 | LOC374443 | LOC10012829 | MIR1323  | LOC643981 | ALG12    |
| LRRC67     | LOC10012885 | LOC387770 | LOC10012840 | MIR302C  | LOC644043 | ALG13    |
| MAGEA9B    | LOC10012912 | LOC387790 | LOC10012872 | MIR365-1 | LOC644092 | ALG14    |
| MAOB       | LOC10012913 | LOC388327 | LOC10012874 | MIXL1    | LOC644284 | ALG1L    |
| MARK4      | LOC10012914 | LOC389118 | LOC10012890 | MKX      | LOC644297 | ALG3     |
| MBLAC1     | LOC10012929 | LOC389332 | LOC10012928 | MLLT3    | LOC644424 | ALG5     |
| MESDC2     | LOC10012946 | LOC390251 | LOC10012932 | MMP25    | LOC644884 | ALG6     |
| MGC5139    | LOC10012969 | LOC392382 | LOC10012939 | MPP2     | LOC645079 | ALG8     |
| MIR106A    | LOC10013001 | LOC400558 | LOC10012946 | MUC12    | LOC645159 | ALG9     |
| MIR1275    | LOC10013038 | LOC400743 | LOC10012949 | MYH6     | LOC645241 | ALK      |
| MIR199B    | LOC10013059 | LOC400831 | LOC10012977 | NANOG    | LOC645313 | ALKBH1   |
| MIR363     | LOC10013066 | LOC401431 | LOC10013008 | NAP1L2   | LOC645330 | ALKBH2   |
| MIR376C    | LOC10013079 | LOC402116 | LOC10013044 | NDUFB4   | LOC645411 | ALKBH4   |
| MIR383     | LOC10013080 | LOC440525 | LOC10013051 | NEFL     | LOC645464 | ALKBH5   |
| MIR507     | LOC10013084 | LOC441032 | LOC10013052 | NELL1    | LOC645638 | ALKBH6   |
| MIR564     | LOC10013103 | LOC441378 | LOC10013067 | NKD1     | LOC645743 | ALKBH7   |
| MIR761     | LOC10013121 | LOC441632 | LOC10013073 | NKX6-2   | LOC645963 | ALKBH8   |
| MIR92A2    | LOC10013131 | LOC441864 | LOC10013076 | NMNAT3   | LOC646038 | ALMS1    |
| MIR939     | LOC10013133 | LOC442064 | LOC10013080 | NOTUM    | LOC646194 | ALOX15B  |
| MR1        | LOC10013147 | LOC553158 | LOC10013081 | NPFFR2   | LOC646434 | ALOX5    |
| MS4A13     | LOC10013165 | LOC554207 | LOC10013104 | NPL      | LOC646496 | ALPK2    |
| MSX2P1     | LOC10013189 | LOC641518 | LOC10013104 | NPTX2    | LOC646990 | ALPL     |
| MYCNOS     | LOC10013202 | LOC642267 | LOC10013139 | NRTN     | LOC647250 | ALPP     |
| MYF6       | LOC10013220 | LOC642648 | LOC10013168 | NTM      | LOC647589 | ALS2     |
| MYH11      | LOC10013249 | LOC642732 | LOC10013176 | NTN3     | LOC647650 | ALS2CR14 |
| MYLPF      | LOC10013264 | LOC642769 | LOC10013183 | NUDT10   | LOC647827 | ALS2CR4  |
| NCRNA00160 | LOC10013311 | LOC642787 | LOC10013204 | NUDT4    | LOC647928 | ALX1     |
| NDUFC2     | LOC10013317 | LOC643389 | LOC10013209 | OLFM1    | LOC648169 | AMAC1L3  |
| NEFM       | LOC10013340 | LOC643647 | LOC10013216 | ONECUT2  | LOC648226 | AMACR    |
| NFKBIL1    | LOC10013343 | LOC643888 | LOC10013250 | OPRK1    | LOC648366 | AMBRA1   |
| NFS1       | LOC10013355 | LOC643911 | LOC10013256 | OR10AG1  | LOC648570 | AMD1     |
| NRG3       | LOC10013355 | LOC643985 | LOC10013270 | OR4S1    | LOC648814 | AMDHD2   |
| NRXN1      | LOC10013355 | LOC644001 | LOC10013307 | OXER1    | LOC649270 | AMFR     |
| NUDT16P    | LOC10013357 | LOC644096 | LOC10013318 | PCDH20   | LOC649711 | AMHR2    |
| NUPL1      | LOC10013366 | LOC644384 | LOC10013319 | PCDH21   | LOC649841 | AMMECR1  |
| OPCML      | LOC10013386 | LOC644544 | LOC10013331 | PCSK9    | LOC649999 | AMMECR1L |
| OR2A14     | LOC10013400 | LOC644612 | LOC10013347 | PDE12    | LOC650111 | AMN1     |
| OR5D18     | LOC10013403 | LOC644632 | LOC10013358 | PDE3B    | LOC650155 | AMOT     |
| OR6Y1      | LOC10013414 | LOC644694 | LOC10013360 | PDZD4    | LOC650227 | AMOTL2   |
| OR7G2      | LOC10013416 | LOC644701 | LOC10013365 | PGBD5    | LOC650346 | AMT      |
| OR7G3      | LOC10013425 | LOC644733 | LOC10013374 | PIK3R3   | LOC650546 | AMY1A    |
| PCDH9      | LOC10013441 | LOC644763 | LOC10013377 | PLCH1    | LOC650580 | AMY1B    |
| PCDHA7     | LOC10013453 | LOC644992 | LOC10013388 | PLD4     | LOC650683 | AMY1C    |
| PCGF3      | LOC10014460 | LOC645195 | LOC10013393 | PLEKHB1  | LOC650706 | AMZ2     |
| PDYN       | LOC10018894 | LOC645434 | LOC10013400 | PMCHL1   | LOC650757 | ANAPC1   |

|           |             |           |             |           |           |              |
|-----------|-------------|-----------|-------------|-----------|-----------|--------------|
| PLA2G2A   | LOC10019237 | LOC645659 | LOC10013428 | PNMA2     | LOC651073 | ANAPC10      |
| PPBPL2    | LOC113230   | LOC645969 | LOC10013435 | PNMA3     | LOC651309 | ANAPC11      |
| PPIL4     | LOC126520   | LOC646111 | LOC10013476 | PODXL2    | LOC652044 | ANAPC13      |
| PRCD      | LOC162073   | LOC646208 | LOC10013482 | POLR1A    | LOC652078 | ANAPC4       |
| PRM3      | LOC220729   | LOC646491 | LOC126767   | POM121L4P | LOC652226 | ANAPC5       |
| PRODH2    | LOC255275   | LOC646513 | LOC128322   | POMZP3    | LOC652234 | ANG          |
| PROP1     | LOC255326   | LOC646533 | LOC131873   | POU5F1    | LOC652570 | ANGEL1       |
| PRR20E    | LOC283588   | LOC646568 | LOC133185   | PPAPDC1A  | LOC652589 | ANGEL2       |
| PRSS1     | LOC283767   | LOC646572 | LOC144383   | PPAPDC3   | LOC652697 | ANGPT1       |
| PTCHD2    | LOC283874   | LOC646981 | LOC149620   | PPID      | LOC653034 | ANGPTL2      |
| PTH2R     | LOC284296   | LOC647169 | LOC152024   | PPP1R16B  | LOC653100 | ANGPTL4      |
| PTPRT     | LOC284297   | LOC647195 | LOC157627   | PRAC      | LOC653115 | ANK3         |
| RAX       | LOC285047   | LOC647262 | LOC165186   | PRDM14    | LOC653188 | ANKDD1A      |
| RCP9      | LOC338667   | LOC647264 | LOC200420   | PRIM2     | LOC653197 | ANKFY1       |
| RDH12     | LOC340156   | LOC647488 | LOC201175   | PRKAR1B   | LOC653257 | ANKHD1       |
| REG3G     | LOC387856   | LOC648608 | LOC202181   | PRKCB     | LOC653269 | ANKHD1-EIF4E |
| RGS21     | LOC388436   | LOC648963 | LOC221136   | PRKCB1    | LOC653349 | ANKIB1       |
| RMRP      | LOC388514   | LOC649210 | LOC255620   | PROK2     | LOC653352 | ANKLE2       |
| RNU86     | LOC388559   | LOC649801 | LOC283116   | PRPH2     | LOC653545 | ANKMY1       |
| RSHL3     | LOC388565   | LOC649897 | LOC283155   | PRR16     | LOC653717 | ANKMY2       |
| RTN1      | LOC388681   | LOC650020 | LOC283174   | PRR7      | LOC653720 | ANKRA2       |
| SCG3      | LOC388814   | LOC650254 | LOC283683   | PRRX2     | LOC654201 | ANKRD1       |
| SCN9A     | LOC389102   | LOC650339 | LOC284428   | PRSS42    | LOC654253 | ANKRD10      |
| SCRT1     | LOC390372   | LOC650780 | LOC285016   | psiTPTE22 | LOC654342 | ANKRD11      |
| SECTM1    | LOC392843   | LOC650815 | LOC285296   | PTPRZ1    | LOC723805 | ANKRD12      |
| SEMA3D    | LOC400145   | LOC651029 | LOC285620   | RAB3C     | LOC727759 | ANKRD13A     |
| SENP8     | LOC401588   | LOC651621 | LOC286076   | RAI2      | LOC727832 | ANKRD13C     |
| SFRP5     | LOC402560   | LOC651772 | LOC339742   | RASA3     | LOC727913 | ANKRD13D     |
| SFRS12IP1 | LOC402693   | LOC651777 | LOC339760   | RASGRP4   | LOC727950 | ANKRD16      |
| SLC13A2   | LOC415056   | LOC652291 | LOC339809   | RASL10A   | LOC728147 | ANKRD17      |
| SLC22A6   | LOC439936   | LOC652634 | LOC340094   | RBM43     | LOC728262 | ANKRD20A1    |
| SLC25A31  | LOC440836   | LOC652669 | LOC340970   | REST      | LOC728308 | ANKRD20B     |
| SLC26A8   | LOC440978   | LOC652698 | LOC342934   | RET       | LOC728683 | ANKRD22      |
| SLC2A9    | LOC440993   | LOC652699 | LOC349114   | RFTN2     | LOC728711 | ANKRD24      |
| SLC30A6   | LOC441151   | LOC652736 | LOC388002   | RGR       | LOC728790 | ANKRD26      |
| SLC35D1   | LOC441208   | LOC652837 | LOC388237   | RGS1      | LOC728942 | ANKRD27      |
| SMCR7     | LOC442421   | LOC652904 | LOC388255   | RINL      | LOC729008 | ANKRD28      |
| SNHG10    | LOC554223   | LOC653105 | LOC388925   | RLTPR     | LOC729173 | ANKRD30B     |
| SNORD58B  | LOC641365   | LOC653110 | LOC391703   | RNF175    | LOC729176 | ANKRD32      |
| SNX15     | LOC641801   | LOC653333 | LOC391727   | RNF2      | LOC729198 | ANKRD33      |
| SOS2      | LOC641823   | LOC653383 | LOC392264   | RPS6KA6   | LOC729260 | ANKRD34A     |
| SPAG6     | LOC641999   | LOC653696 | LOC399940   | RTP1      | LOC729602 | ANKRD35      |
| SV2B      | LOC642062   | LOC654135 | LOC400707   | RYR1      | LOC729609 | ANKRD36B     |
| SYN3      | LOC642097   | LOC727721 | LOC400958   | SBNO1     | LOC729659 | ANKRD37      |
| SYPL2     | LOC642109   | LOC727797 | LOC401442   | SCARNA12  | LOC729739 | ANKRD38      |
| SYT9      | LOC642369   | LOC727866 | LOC401911   | SCNN1G    | LOC729793 | ANKRD39      |
| TCEAL5    | LOC642486   | LOC727997 | LOC402176   | SEMA4A    | LOC730007 | ANKRD40      |
| TCTN2     | LOC642635   | LOC728493 | LOC440350   | SHE       | LOC730130 | ANKRD44      |
| TDH       | LOC642759   | LOC728748 | LOC440508   | SHISA3    | LOC730153 | ANKRD46      |
| TDRG1     | LOC642953   | LOC728831 | LOC441179   | SHISA4    | LOC730236 | ANKRD47      |

|         |           |           |           |            |            |         |
|---------|-----------|-----------|-----------|------------|------------|---------|
| TGM6    | LOC643008 | LOC729020 | LOC441416 | SIRT6      | LOC730387  | ANKRD49 |
| TMC5    | LOC643012 | LOC729051 | LOC441505 | SLC1A2     | LOC730517  | ANKRD50 |
| TMCO4   | LOC643018 | LOC729065 | LOC441666 | SLC25A24   | LOC730809  | ANKRD52 |
| TMEM110 | LOC643222 | LOC729212 | LOC441806 | SLC7A14    | LOC730995  | ANKRD54 |
| TMEM173 | LOC643240 | LOC729667 | LOC641693 | SLC8A2     | LOC732419  | ANKRD57 |
| TMEM202 | LOC643339 | LOC729852 | LOC641922 | SLITRK4    | LOC732450  | ANKRD6  |
| TMPRSS4 | LOC643382 | LOC730087 | LOC642073 | SMCHD1     | LOC91664   | ANKRD9  |
| TNXA    | LOC643388 | LOC730092 | LOC642154 | SMCP       | LOC93349   | ANKS1A  |
| TOP     | LOC643466 | LOC730226 | LOC642160 | SNORA65    | LOH3CR2A   | ANKS1B  |
| TRIM15  | LOC643605 | LOC730358 | LOC642362 | SNORA79    | LOX        | ANKS3   |
| TRPV4   | LOC643841 | LOC730393 | LOC642381 | SNORA7A    | LOXHD1     | ANKZF1  |
| TTC29   | LOC644019 | LOC731196 | LOC642456 | SNORD100   | LOXL4      | ANLN    |
| UBE2B   | LOC644083 | LOC90499  | LOC642788 | SNORD15B   | LPPR2      | ANO10   |
| UCP1    | LOC644313 | LOH12CR2  | LOC642833 | SNORD25    | LRRC37A    | ANO2    |
| UFD1L   | LOC644322 | LPAR5     | LOC642935 | SNORD32A   | LRRC37A4   | ANO6    |
| USP53   | LOC644391 | LRRC16B   | LOC643296 | SNORD33    | LRRC56     | ANO8    |
| WARS2   | LOC644415 | LRRC29    | LOC643550 | SNORD55    | LSM11      | ANO9    |
| WDR3    | LOC644436 | LY6H      | LOC643556 | SNORD96A   | MAMDC4     | ANP32A  |
| WIPF2   | LOC644496 | MAP1A     | LOC643700 | SOBP       | MAML3      | ANP32B  |
| WNT3A   | LOC644644 | MAP2      | LOC643712 | SOX10      | MAN2A2     | ANP32C  |
| XK      | LOC644672 | MAP7D2    | LOC643815 | SOX12      | MAP1LC3B2  | ANPEP   |
| XPOT    | LOC644814 | MAPK14    | LOC643817 | SPATA4     | MAP9       | ANTXR1  |
| ZCCHC16 | LOC644844 | 09. Mrz   | LOC643836 | SPINK2     | MAPK8IP2   | ANTXR2  |
| ZCWPW2  | LOC644990 | MBD5      | LOC643879 | SRD5A3     | MEF2A      | ANXA1   |
| ZMYND12 | LOC645135 | MDM1      | LOC644012 | SRY        | MEGF9      | ANXA11  |
| ZNF214  | LOC645172 | MECP2     | LOC644113 | ST6GALNAC5 | MGC13005   | ANXA2   |
| ZNF233  | LOC645212 | MEI1      | LOC644234 | STK32A     | MGC26718   | ANXA2P1 |
| ZNF385B | LOC645365 | MEP1A     | LOC644366 | STK33      | MGC5457    | ANXA2P2 |
| ZNF566  | LOC645367 | MGC45800  | LOC644580 | SYT4       | MIR1253    | ANXA2P3 |
| ZNF747  | LOC645478 | MGP       | LOC644641 | T          | MIR29B1    | ANXA3   |
| ZNF836  | LOC645520 | MIR181C   | LOC644695 | TAF3       | MIR604     | ANXA5   |
| ZNF92   | LOC645627 | MIR21     | LOC644714 | TAF4B      | MLL3       | ANXA6   |
| ZSCAN20 | LOC645671 | MIR635    | LOC644836 | TBX22      | MLLT1      | ANXA7   |
|         | LOC645676 | MOCS2     | LOC645010 | TDGF1      | MLLT4      | AOF2    |
|         | LOC645723 | MORC3     | LOC645188 | TDRKH      | MMP14      | AP1B1   |
|         | LOC645835 | MORN3     | LOC645217 | THBS2      | MMP9       | AP1G1   |
|         | LOC646008 | MOXD1     | LOC645335 | THG1L      | MUC4       | AP1G2   |
|         | LOC646012 | MREG      | LOC645722 | TIGD1      | MUC6       | AP1GBP1 |
|         | LOC646128 | MSRA      | LOC645848 | TLE6       | MYCL1      | AP1M1   |
|         | LOC646154 | MTTP      | LOC645967 | TMEM132D   | MYCT1      | AP1M2   |
|         | LOC646312 | MUC15     | LOC645974 | TMEM145    | MYH3       | AP1S1   |
|         | LOC646403 | MYL3      | LOC646300 | TMEM155    | MYL2       | AP1S2   |
|         | LOC646576 | MYLK      | LOC646304 | TMEM169    | NACAD      | AP2A1   |
|         | LOC646585 | NANP      | LOC646422 | TMPRSS11E2 | NBPF11     | AP2A2   |
|         | LOC646632 | NAT1      | LOC646867 | TNFRSF14   | NCF4       | AP2B1   |
|         | LOC646746 | NLRP3     | LOC646934 | TNMD       | NCRNA00173 | AP2M1   |
|         | LOC646762 | NOL4      | LOC647082 | TOP1P1     | NEB        | AP2S1   |
|         | LOC646774 | NOSTRIN   | LOC647295 | TOR2A      | NEIL1      | AP3B1   |
|         | LOC646779 | NPAS3     | LOC647359 | TOX3       | NLRP2      | AP3B2   |
|         | LOC646804 | NPNT      | LOC647499 | TPTE2      | NNMT       | AP3D1   |

|           |          |           |         |          |          |
|-----------|----------|-----------|---------|----------|----------|
| LOC646906 | NRF1     | LOC647521 | TRDMT1  | NOG      | AP3M1    |
| LOC647054 | NRXN3    | LOC647606 | TRIM46  | NOS3     | AP3M2    |
| LOC647060 | NTNG1    | LOC647854 | TRIM61  | NR0B1    | AP3S1    |
| LOC647515 | NUDT13   | LOC647911 | TRIM73  | NR4A2    | AP3S2    |
| LOC647568 | NUDT8    | LOC647993 | TRPS1   | NRG1     | AP4B1    |
| LOC647955 | NUP98    | LOC648039 | TTC28   | NTF5     | AP4E1    |
| LOC647979 | OCLN     | LOC648069 | TTC9    | NTN1     | AP4M1    |
| LOC647987 | OR2H2    | LOC648138 | TTLL6   | NXF4     | APAF1    |
| LOC648130 | OSR1     | LOC648205 | TTYH1   | ODF3B    | APBA2BP  |
| LOC648196 | OTUD7B   | LOC648716 | TUBA3E  | OLFML2A  | APBA3    |
| LOC648293 | OVOL1    | LOC648815 | TUBA4A  | OR2W3    | APBB1IP  |
| LOC648585 | P2RY2    | LOC648855 | UPK1A   | OSBP2    | APBB3    |
| LOC648600 | PAFAH1B2 | LOC649199 | USH2A   | PACRGL   | APEG1    |
| LOC648682 | PCBP3    | LOC649282 | USP44   | PAIP2B   | APEH     |
| LOC648744 | PCDHB10  | LOC649292 | UTP20   | PATE1    | APEX1    |
| LOC648984 | PCDHB13  | LOC649604 | VAX2    | PBX4     | APEX2    |
| LOC649025 | PCLO     | LOC649635 | VCX2    | PCDHGA12 | APH1A    |
| LOC649186 | PCSK6    | LOC649702 | VENTX   | PDE4DIP  | APH1B    |
| LOC649379 | PDE8B    | LOC650003 | VSNL1   | PDE8A    | API5     |
| LOC649500 | PELI3    | LOC650036 | WBSCR17 | PDGFB    | APIP     |
| LOC649613 | PFN4     | LOC650037 | WNT8A   | PDK1     | APITD1   |
| LOC649620 | PID1     | LOC650061 | ZC3H13  | PDLIM5   | APLNR    |
| LOC649680 | PIWIL4   | LOC650239 | ZDHHC22 | PDXDC2   | APLP1    |
| LOC649977 | PKP3     | LOC650823 | ZFPM2   | PEAR1    | APLP2    |
| LOC650293 | PLA2G12B | LOC650845 | ZNF132  | PHF6     | APOA1    |
| LOC650562 | PLA2G2C  | LOC650922 | ZNF280A | PIP5K1A  | APOA1BP  |
| LOC650628 | PLA2G7   | LOC650950 | ZNF385D | PIP5K1B  | APOA2    |
| LOC651102 | PLAC8    | LOC651075 | ZNF43   | PLAUR    | APOA4    |
| LOC651169 | PLD6     | LOC651511 | ZNF460  | PLCH2    | APOBEC3C |
| LOC651213 | PLP2     | LOC651951 | ZNF510  | PLD5     | APOBEC3D |
| LOC651520 | PM20D2   | LOC652003 | ZNF533  | POLH     | APOBEC3F |
| LOC651558 | POSTN    | LOC652045 | ZNF57   | PPM2C    | APOBEC3G |
| LOC651680 | PPM1J    | LOC652175 | ZNF620  | PPP1R1B  | APOC1    |
| LOC651997 | PPP1R1C  | LOC652183 | ZNF642  | PPP1R3E  | APOE     |
| LOC652094 | PRKCE    | LOC652260 | ZNF643  | PRDM5    | APOL3    |
| LOC652326 | PRR15    | LOC652543 | ZNF713  | PRDM7    | APOLD1   |
| LOC652627 | PSD4     | LOC652606 | ZNF81   | PRH1     | APOM     |
| LOC652630 | RAP1A    | LOC652635 | ZNF844  | PRO0628  | APOO     |
| LOC652674 | RARB     | LOC652684 | ZSCAN10 | PRPF39   | APOOL    |
| LOC652688 | RARRES1  | LOC652721 |         | PSG4     | APP      |
| LOC652713 | RASGRP1  | LOC652722 |         | PTCHD1   | APPBP2   |
| LOC652771 | RB1      | LOC652762 |         | PTPN7    | APPL1    |
| LOC652839 | RBAK     | LOC652805 |         | PVRL1    | APPL2    |
| LOC652846 | RBP2     | LOC653066 |         | PXMP4    | APRT     |
| LOC653157 | RBP4     | LOC653113 |         | QPCTL    | APTIX    |
| LOC653199 | REEP1    | LOC653194 |         | RALGPS2  | AQP11    |
| LOC653204 | REL      | LOC653319 |         | RAMP2    | AQP12B   |
| LOC653234 | RETNLB   | LOC653355 |         | RASGRP2  | AQR      |
| LOC653316 | RFPL1    | LOC653641 |         | RBM24    | AR       |
| LOC653539 | RFX6     | LOC653689 |         | RBMS3    | ARAF     |

|           |              |           |
|-----------|--------------|-----------|
| LOC653652 | RGAG1        | LOC727737 |
| LOC653701 | RGAG4        | LOC727937 |
| LOC653796 | RGN          | LOC728441 |
| LOC653853 | RP11-49G10.8 | LOC728566 |
| LOC653876 | RP2          | LOC728671 |
| LOC653962 | RPH3AL       | LOC728673 |
| LOC654002 | RRM2         | LOC729010 |
| LOC654078 | RUNX1        | LOC729225 |
| LOC654128 | S100P        | LOC729231 |
| LOC727882 | SCP2         | LOC729486 |
| LOC727901 | SCUBE3       | LOC729487 |
| LOC727924 | SDCCAG8      | LOC729832 |
| LOC728178 | SDK1         | LOC729854 |
| LOC728205 | SDR39U1      | LOC730032 |
| LOC728216 | SENP1        | LOC730086 |
| LOC728291 | SERP2        | LOC730281 |
| LOC728362 | SERPINC1     | LOC730291 |
| LOC728400 | SERPINF2     | LOC730686 |
| LOC728519 | SGCG         | LOC730919 |
| LOC728543 | SGMS1        | LOC730953 |
| LOC728664 | SH2B2        | LOC731496 |
| LOC728811 | SH3BGR       | LOC92017  |
| LOC728876 | SH3BP5       | LOC93432  |
| LOC728924 | SHANK2       | LPPR5     |
| LOC728929 | SHD          | LRRC2     |
| LOC729209 | SIK1         | LRRC33    |
| LOC729374 | SLC12A5      | LRRK1     |
| LOC729408 | SLC13A5      | LTC4S     |
| LOC729433 | SLC16A14     | LUZP6     |
| LOC729530 | SLC16A6      | M160      |
| LOC729558 | SLC1A4       | MAGEB3    |
| LOC729642 | SLC22A7      | MAGI2     |
| LOC729645 | SLC23A1      | MAGI3     |
| LOC729828 | SLC30A2      | MAMLD1    |
| LOC729837 | SLC34A1      | MAP1D     |
| LOC730036 | SLC38A11     | MAP6      |
| LOC730392 | SLC39A5      | MAPK11    |
| LOC730396 | SLC39A9      | 04. Mrz   |
| LOC730644 | SLC41A2      | MAST4     |
| LOC730877 | SLC6A12      | MBD3L2    |
| LOC730952 | SLC6A4       | MCC       |
| LOC731227 | SLC7A9       | MDFI      |
| LOC731718 | SLFN11       | MEG3      |
| LOC731742 | SLN          | METTL11B  |
| LOC732160 | SMAD9        | METTL8    |
| LOC732229 | SMOC2        | MGAT5B    |
| LOC732443 | SMTNL2       | MGC13168  |
| LONRF2    | SNORA5B      | MGC40168  |
| LPL       | SNORD114-2   | MIAT      |
| LRCH1     | SNORD78      | MIR1208   |

|          |           |
|----------|-----------|
| RCSD1    | ARAP1     |
| RDH16    | ARAP3     |
| RGL4     | ARCN1     |
| RGPD5    | ARD1A     |
| RGS11    | ARF1      |
| RGS20    | ARF3      |
| RIMBP3B  | ARF4      |
| RND1     | ARF5      |
| RNU105C  | ARF6      |
| RNU11    | ARFGAP1   |
| RNU4-1   | ARFGAP2   |
| RP9P     | ARFGAP3   |
| SAMD10   | ARFGEF1   |
| SAMD14   | ARFGEF2   |
| SAMD4A   | ARFIP1    |
| SCAF1    | ARG2      |
| SCARNA3  | ARGLU1    |
| SCFD2    | ARHGAP1   |
| SDC3     | ARHGAP10  |
| SELE     | ARHGAP11A |
| SEMA3B   | ARHGAP12  |
| SEMA6D   | ARHGAP15  |
| 13. Sep  | ARHGAP17  |
| SFI1     | ARHGAP19  |
| SFN      | ARHGAP21  |
| SFXN3    | ARHGAP22  |
| SHOX2    | ARHGAP23  |
| SHROOM1  | ARHGAP24  |
| SLC14A1  | ARHGAP25  |
| SLC22A1  | ARHGAP27  |
| SLC4A3   | ARHGAP28  |
| SLC6A16  | ARHGAP4   |
| SLC9A9   | ARHGAP9   |
| SMC1A    | ARHGDI A  |
| SNAP25   | ARHGDI B  |
| SNORA11E | ARHGEF1   |
| SNORA28  | ARHGEF10  |
| SNORA71A | ARHGEF10L |
| SNORA72  | ARHGEF11  |
| SNORA77  | ARHGEF12  |
| SNORA80  | ARHGEF16  |
| SNORD11  | ARHGEF17  |
| SNORD123 | ARHGEF18  |
| SNORD69  | ARHGEF19  |
| SNORD87  | ARHGEF2   |
| SNORD99  | ARHGEF3   |
| SOCS7    | ARHGEF5   |
| SPANXA2  | ARHGEF5L  |
| SPANXB1  | ARHGEF6   |
| SPARCL1  | ARHGEF7   |



|          |              |            |
|----------|--------------|------------|
| LRMP     | SNORD89      | MIR1234    |
| LRRC38   | SOAT2        | MIR1267    |
| LTB      | SOCS6        | MIR331     |
| LTF      | SOS1         | MIR720     |
| LY6G6C   | SOSTDC1      | MIRLET7I   |
| LYG1     | SPAG4        | MLKL       |
| LYPD5    | SPRN         | MMP16      |
| LYST     | SPTLC3       | MOBP       |
| MAL      | SRD5A2L2     | MPP3       |
| MAP3K13  | SRR          | MPV17L     |
| MAPKBP1  | SRRM5        | MRAS       |
| MATN1    | SSFA2        | MRGPRF     |
| MCF2L2   | SUMO4        | MRM1       |
| MDM2     | SYK          | MT3        |
| MED12L   | SYNPO2       | MYLC2PL    |
| METTL2B  | TAAR8        | MYO1G      |
| MFSD9    | TAC1         | MYRIP      |
| MGC23270 | TAC4         | MYSM1      |
| MGC35440 | TBC1D8B      | MYST4      |
| MGC52498 | TCF21        | MYT1       |
| MGLL     | TCP10L       | NCRNA00113 |
| MIA      | TEX11        | NCRNA00162 |
| MICALL2  | TFAP2B       | NECAB1     |
| MIP      | TFCP2L1      | NFASC      |
| MIR1247  | THAP3        | NFIA       |
| MIR128-2 | THAP8        | NFIC       |
| MIR1915  | THBS1        | NGFR       |
| MIR212   | THEX1        | NHLH2      |
| MIR30C2  | THSD3        | NKAIN1     |
| MIR326   | TIGD6        | NKX2-5     |
| MIR448   | TIGIT        | NLF2       |
| MIR450A1 | TLR6         | NLRP5      |
| MIR532   | TM4SF18      | NMUR2      |
| MIR574   | TM6SF2       | NOS1AP     |
| MIR577   | TMCC3        | NOS2       |
| MIR642   | TMEM105      | NPM2       |
| MIR708   | TMEM191C     | NPPA       |
| MIRLET7D | TMEM20       | NPTX1      |
| MMP1     | TMEM37       | NR1I2      |
| MMP21    | TMEM56       | NRN1L      |
| MPP7     | TMEM68       | NRP2       |
| MRGPRX1  | TMEM8B       | NTN4       |
| MRGPRX3  | TMOD2        | NTRK1      |
| MRGPRX4  | TMPO         | ONECUT1    |
| MSLN     | TMPRSS13     | OR52N2     |
| MT4      | TMTC2        | OR5AP2     |
| MTSS1L   | TNFSF12-TNFS | OR5K4      |
| MTUS2    | TRIM17       | OVOS2      |
| MXRA8    | TRIM62       | PACRG      |
| MYBPC3   | TRPV6        | PADI3      |

|           |         |
|-----------|---------|
| SPATA13   | ARID1A  |
| SPTBN4    | ARID2   |
| SRCAP     | ARID3A  |
| SRPX2     | ARID3B  |
| SSX3      | ARID4A  |
| ST3GAL4   | ARID4B  |
| STAC      | ARID5B  |
| STK32C    | ARIH1   |
| SULT4A1   | ARIH2   |
| SYCE2     | ARL1    |
| TBC1D21   | ARL13B  |
| TBN       | ARL15   |
| TFEC      | ARL16   |
| TFPI2     | ARL17B  |
| TIMP3     | ARL17P1 |
| TM4SF1    | ARL2    |
| TMEM171   | ARL2BP  |
| TMEM31    | ARL3    |
| TNFRSF10A | ARL4A   |
| TNFRSF1B  | ARL4C   |
| TNFSF12   | ARL4D   |
| TNFSF9    | ARL5A   |
| TNRC18    | ARL5B   |
| TP53I11   | ARL6IP1 |
| TPPP3     | ARL6IP4 |
| TRAF3     | ARL6IP5 |
| TREX1     | ARL6IP6 |
| TRH       | ARL8B   |
| TRPV2     | ARMC1   |
| TSPY3     | ARMC10  |
| UBE2NL    | ARMC5   |
| UBR1      | ARMC6   |
| UNC5C     | ARMC7   |
| UNC5CL    | ARMC8   |
| USP19     | ARMC9   |
| VAPA      | ARMCX1  |
| VAPB      | ARMCX2  |
| VIPR2     | ARMCX3  |
| VPS13B    | ARMCX4  |
| VWA3A     | ARMCX5  |
| WDR17     | ARMCX6  |
| WFDC10B   | ARMET   |
| WNK4      | ARNT    |
| ZBTB7B    | ARNT2   |
| ZC3HAV1L  | ARPC1A  |
| ZMYND17   | ARPC1B  |
| ZNF236    | ARPC2   |
| ZNF276    | ARPC3   |
| ZNF345    | ARPC4   |
| ZNF346    | ARPC5   |

|         |         |             |
|---------|---------|-------------|
| MYBPHL  | TSGA10  | PAQR5       |
| MYL1    | TSPYL4  | PAX6        |
| MYLK4   | TTC30A  | PAX7        |
| MYO7A   | TTLL7   | PCDH24      |
| MYOM1   | TTR     | PCDHAC1     |
| NAT8B   | TWF1    | PCDHAC2     |
| NEU4    | UBA7    | PCDHGA10    |
| NHEDC2  | UGT2B7  | PCDHGC3     |
| NIPAL1  | ULBP2   | PDE2A       |
| NIPAL4  | ULK4    | PDE4B       |
| NKAIN4  | UMPS    | PENK        |
| NKPD1   | UNC93A  | PGA3        |
| NKX2-3  | UPK2    | PIPOX       |
| NLRC3   | UPK3B   | PKLR        |
| NR6A1   | USP43   | PLA2G3      |
| NTF4    | VGLL1   | PLCB2       |
| NTN5    | VIL1    | PLCB4       |
| NTRK2   | VN1R2   | PLEKHH2     |
| NXPH2   | VTN     | PNMA6A      |
| OAS2    | WAPAL   | PPAN-P2RY11 |
| OAS3    | WDR47   | PPARGC1B    |
| OCA2    | WFIKKN1 | PPFIA4      |
| ODAM    | WNT11   | PPIF        |
| OLFM2   | WNT6    | PPP2R2C     |
| OLFML1  | XAGE2B  | PRAMEF9     |
| OLR1    | XKR4    | PRDM2       |
| OPHN1   | XKRX    | PRDM6       |
| OR1L8   | YLPM1   | PRDM9       |
| OR2L13  | ZBTB16  | PRG4        |
| OR2T12  | ZBTB32  | PRPF40B     |
| OR52N5  | ZCCHC4  | PRR12       |
| OR7E91P | ZDHHC15 | PTAFR       |
| OSM     | ZDHHC20 | PTGDS       |
| OSR2    | ZFP62   | PTGS1       |
| OXGR1   | ZNF184  | RAB11B      |
| P2RX6   | ZNF230  | RAB26       |
| P8      | ZNF311  | RAB33A      |
| PA2G4P4 | ZNF404  | RALGAPA2    |
| PADI2   | ZNF429  | RAPGEF3     |
| PALMD   | ZNF552  | RASAL1      |
| PARD6B  | ZNF587  | RASD2       |
| PATZ1   | ZNF611  | RASGRF2     |
| PBLD    | ZNF623  | RCC1        |
| PCP4    | ZNF703  | RD3         |
| PDAP1   | ZNF740  | RELT        |
| PDZD3   | ZNF750  | REM2        |
| PGBD4   | ZNF774  | RERGL       |
| PGPEP1  | ZNRF2   | RFPL2       |
| PHF8    | ZXDB    | RFPL3       |
| PHLDA2  |         | RGS14       |

|        |         |
|--------|---------|
| ZNF542 | ARPC5L  |
| ZNF563 | ARPP19  |
| ZNF628 | ARRB1   |
| ZNF699 | ARRDC2  |
| ZNF771 | ARRDC3  |
| ZNF790 | ARS2    |
| ZNF8   | ARSA    |
|        | ARSB    |
|        | ARSD    |
|        | ARSE    |
|        | ARSG    |
|        | ARSK    |
|        | ART1    |
|        | ART5    |
|        | ARV1    |
|        | AS3MT   |
|        | ASAH1   |
|        | ASAH2C  |
|        | ASAM    |
|        | ASAP1   |
|        | ASAP2   |
|        | ASAP3   |
|        | ASB1    |
|        | ASB13   |
|        | ASB3    |
|        | ASB6    |
|        | ASB7    |
|        | ASB8    |
|        | ASCC1   |
|        | ASCC2   |
|        | ASCC3   |
|        | ASF1A   |
|        | ASF1B   |
|        | ASGR1   |
|        | ASH2L   |
|        | ASL     |
|        | ASMTL   |
|        | ASNA1   |
|        | ASNS    |
|        | ASNSD1  |
|        | ASPH    |
|        | ASPHD2  |
|        | ASPM    |
|        | ASPSCR1 |
|        | ASRGL1  |
|        | ASS1    |
|        | ASTE1   |
|        | ASTN2   |
|        | ASXL1   |
|        | ASXL2   |

|          |
|----------|
| PHYHIPL  |
| PI4KA    |
| PIGZ     |
| PJCG6    |
| PKD1L2   |
| PLA2G16  |
| PLAC2    |
| PLEK2    |
| PLEKHG4B |
| PLEKHG5  |
| PLSCR5   |
| PMFBP1   |
| PNPLA4   |
| PODN     |
| POPDC2   |
| PPARA    |
| PPEF1    |
| PPIL6    |
| PRAMEF13 |
| PRKAA2   |
| PROX1    |
| PRSS22   |
| PRTG     |
| PSCA     |
| PSD2     |
| PSG2     |
| PSG3     |
| PSG5     |
| PSG6     |
| PSG7     |
| PTK9     |
| PVRL4    |
| PZP      |
| QRSL1    |
| RABL5    |
| RAD18    |
| RAPSN    |
| RASA2    |
| RASEF    |
| RBL1     |
| RBM19    |
| RBMY3AP  |
| REV3L    |
| RFT1     |
| RFXDC2   |
| RGP1     |
| RICTOR   |
| RIN3     |
| RLN1     |
| RNASE6   |

|          |
|----------|
| RGS7     |
| RHEBL1   |
| RHPN1    |
| RIMBP2   |
| RIT2     |
| RNF125   |
| RNU6ATAC |
| RNY4     |
| RORB     |
| RPRML    |
| RTN4RL1  |
| S100Z    |
| S1PR5    |
| SALL1    |
| SAMD3    |
| SAMSN1   |
| SCARNA14 |
| SCARNA18 |
| SCARNA22 |
| SCARNA8  |
| SCARNA9L |
| SCG2     |
| SCN4A    |
| SCN4B    |
| SCNN1B   |
| SDCBP2   |
| SEMG1    |
| SERHL2   |
| SERPINB5 |
| SEZ6     |
| SFTA1P   |
| SH2D2A   |
| SH2D3C   |
| SH3RF3   |
| SHC3     |
| SLAMF6   |
| SLC10A4  |
| SLC17A9  |
| SLC24A5  |
| SLC25A35 |
| SLC26A10 |
| SLC2A6   |
| SLC30A4  |
| SLC34A2  |
| SLC45A1  |
| SLC6A1   |
| SLC7A10  |
| SLCO5A1  |
| SLITRK5  |
| SNAI1    |

|         |
|---------|
| ATAD1   |
| ATAD2   |
| ATAD2B  |
| ATAD3A  |
| ATE1    |
| ATF1    |
| ATF2    |
| ATF3    |
| ATF4    |
| ATF5    |
| ATF6    |
| ATF7IP2 |
| ATG10   |
| ATG12   |
| ATG16L1 |
| ATG16L2 |
| ATG2A   |
| ATG3    |
| ATG4A   |
| ATG4B   |
| ATG4C   |
| ATG4D   |
| ATG5    |
| ATG7    |
| ATG9A   |
| ATHL1   |
| ATIC    |
| ATL1    |
| ATL2    |
| ATL3    |
| ATM     |
| ATMIN   |
| ATN1    |
| ATOX1   |
| ATP10A  |
| ATP11B  |
| ATP11C  |
| ATP12A  |
| ATP13A1 |
| ATP13A2 |
| ATP1A1  |
| ATP1A3  |
| ATP1B1  |
| ATP1B3  |
| ATP2A2  |
| ATP2B1  |
| ATP2B4  |
| ATP2C1  |
| ATP5A1  |
| ATP5B   |

|            |
|------------|
| RNF180     |
| RNF32      |
| ROPN1B     |
| RPL32P3    |
| RRAD       |
| RSPO1      |
| S100A3     |
| SAC        |
| SBSN       |
| SCARNA9    |
| SCN2B      |
| SCRG1      |
| SCXA       |
| SDR16C5    |
| SEC15L2    |
| SEMA7A     |
| 01. Sep    |
| SERPINA3   |
| SERPINB7   |
| SERPINB8   |
| SERPINE3   |
| SH3TC1     |
| SIM2       |
| SIRPD      |
| SLA        |
| SLC10A1    |
| SLC15A2    |
| SLC1A6     |
| SLC22A11   |
| SLC22A18AS |
| SLC22A4    |
| SLC23A3    |
| SLC24A2    |
| SLC25A34   |
| SLC30A8    |
| SLC35E2    |
| SLC38A8    |
| SLC4A4     |
| SLC7A4     |
| SLC9A2     |
| SLCO6A1    |
| SMPD4      |
| SMPX       |
| SNORA31    |
| SNORA49    |
| SNORA55    |
| SOD3       |
| SP140      |
| SPATA22    |
| SPDYA      |

|           |
|-----------|
| SNAI3     |
| SNORA21   |
| SNORA3    |
| SNORA34   |
| SNORD10   |
| SNORD109B |
| SNORD11B  |
| SNORD12   |
| SNORD12B  |
| SNORD14B  |
| SNORD48   |
| SNORD53   |
| SNORD56   |
| SNORD76   |
| SNORD91A  |
| SPACA1    |
| SPANXA1   |
| SPATA3    |
| SPOCD1    |
| SSX4      |
| ST8SIA1   |
| ST8SIA2   |
| ST8SIA5   |
| STK32B    |
| STXBP4    |
| SULT2B1   |
| SYNGR3    |
| TAS2R4    |
| TCEB3CL   |
| TDGF3     |
| TDRD12    |
| TEC       |
| TEKT2     |
| TEKT3     |
| TESC      |
| TEX14     |
| TFF3      |
| TGFA      |
| THEM4     |
| THSD7B    |
| TINAG     |
| TKTL1     |
| TMCC2     |
| TMEFF2    |
| TMEM103   |
| TMEM150C  |
| TMEM151   |
| TMEM16D   |
| TMEM201   |
| TMEM52    |

|          |
|----------|
| ATP5C1   |
| ATP5D    |
| ATP5E    |
| ATP5EP2  |
| ATP5F1   |
| ATP5G1   |
| ATP5G2   |
| ATP5G3   |
| ATP5H    |
| ATP5I    |
| ATP5J    |
| ATP5J2   |
| ATP5L    |
| ATP5O    |
| ATP5S    |
| ATP5SL   |
| ATP6AP1  |
| ATP6AP1L |
| ATP6AP2  |
| ATP6V0A1 |
| ATP6V0A2 |
| ATP6V0A4 |
| ATP6V0B  |
| ATP6V0C  |
| ATP6V0D1 |
| ATP6V0E1 |
| ATP6V0E2 |
| ATP6V1A  |
| ATP6V1B1 |
| ATP6V1B2 |
| ATP6V1C1 |
| ATP6V1D  |
| ATP6V1E1 |
| ATP6V1E2 |
| ATP6V1F  |
| ATP6V1G1 |
| ATP6V1G2 |
| ATP6V1H  |
| ATP7B    |
| ATP8B2   |
| ATP9A    |
| ATP9B    |
| ATPAF1   |
| ATPAF2   |
| ATPBD1B  |
| ATPBD3   |
| ATPBD4   |
| ATPIF1   |
| ATRIP    |
| ATRN     |

|          |
|----------|
| SPEF2    |
| SPNS3    |
| SSH1     |
| SST      |
| SSTR1    |
| STELLAR  |
| STS      |
| STX18    |
| STX19    |
| SUFU     |
| SULT1C4  |
| SULT2A1  |
| SYNC1    |
| SYTL3    |
| TAS2R10  |
| TBC1D26  |
| TBRG1    |
| TF       |
| TGFBR1   |
| TGM3     |
| THRSP    |
| TIFA     |
| TINAGL1  |
| TM4SF4   |
| TM4SF5   |
| TMEM117  |
| TMEM140  |
| TMEM161B |
| TMEM176A |
| TMEM194B |
| TMEM217  |
| TMEM40   |
| TMEM86A  |
| TMPRSS6  |
| TMPRSS7  |
| TncRNA   |
| TNFSF10  |
| TNKS2    |
| TP53TG3  |
| TP73L    |
| TPCN1    |
| TRAF1    |
| TRAF3IP3 |
| TREM1    |
| TREML2   |
| TRIM43   |
| TRIM63   |
| TRIM67   |
| TSHZ2    |
| TSPAN1   |

|           |
|-----------|
| TMEM61    |
| TMEM74    |
| TNFAIP2   |
| TNFRSF11A |
| TNFRSF11B |
| TNFSF11   |
| TNNC2     |
| TNP1      |
| TREML1    |
| TRIM47    |
| TRIM59    |
| TRPC6     |
| TRPM3     |
| TRPM6     |
| TRPM7     |
| TSPAN8    |
| TTC21A    |
| UNC5D     |
| USHBP1    |
| USP2      |
| UTF1      |
| UTS2D     |
| VANGL1    |
| VOPP1     |
| VSTM1     |
| WDR88     |
| WIPF3     |
| WNK2      |
| WNT10B    |
| ZAN       |
| ZAP70     |
| ZCCHC12   |
| ZFR2      |
| ZMAT4     |
| ZNF414    |
| ZNF516    |
| ZNF530    |
| ZSCAN22   |
| ZXDA      |

|          |
|----------|
| ATXN1    |
| ATXN10   |
| ATXN1L   |
| ATXN2    |
| ATXN2L   |
| ATXN3    |
| ATXN7L2  |
| ATXN7L3  |
| AUH      |
| AUP1     |
| AURKA    |
| AURKAIP1 |
| AURKB    |
| AUTS2    |
| AVEN     |
| AVL9     |
| AVP      |
| AVPI1    |
| AVPR2    |
| AXIN1    |
| AXIN2    |
| AXL      |
| AXUD1    |
| AYP1p1   |
| AZI1     |
| AZI2     |
| AZIN1    |
| B2M      |
| B3GALNT1 |
| B3GALNT2 |
| B3GALT4  |
| B3GALT6  |
| B3GALTL  |
| B3GAT3   |
| B3GNT1   |
| B3GNT2   |
| B3Gn-T6  |
| B3GNT6   |
| B3GNT8   |
| B3GNTL1  |
| B4GALNT4 |
| B4GALT1  |
| B4GALT2  |
| B4GALT3  |
| B4GALT4  |
| B4GALT5  |
| B4GALT6  |
| B4GALT7  |
| B9D1     |
| B9D2     |

|         |
|---------|
| TSPAN2  |
| TSPY1   |
| TTC18   |
| TTC30B  |
| TTN     |
| TTY17A  |
| TUBAL3  |
| UBASH3B |
| UBD     |
| UBE2QP2 |
| UBQLN3  |
| UBQLNL  |
| UGT2B28 |
| UNC13A  |
| UNC13D  |
| UNG2    |
| USP45   |
| VIT     |
| VMO1    |
| VTI1A   |
| WASF1   |
| WHSC1   |
| WISP1   |
| WNT10A  |
| WWTR1   |
| XAGE1D  |
| XCR1    |
| ZBED2   |
| ZBTB47  |
| ZBTB7C  |
| ZC3H7B  |
| ZCCHC10 |
| ZDHHC14 |
| ZFP28   |
| ZFP57   |
| ZFP92   |
| ZNF292  |
| ZNF321  |
| ZNF350  |
| ZNF469  |
| ZNF71   |
| ZNF717  |
| ZNF831  |
| ZSCAN4  |

|          |
|----------|
| BACE1    |
| BACE2    |
| BACH2    |
| BAD      |
| BAG2     |
| BAG3     |
| BAG4     |
| BAG5     |
| BAGE5    |
| BAHCC1   |
| BAHD1    |
| BAIAP2   |
| BAIAP2L1 |
| BAIAP2L2 |
| BAK1     |
| BAMBI    |
| BANF1    |
| BANP     |
| BAP1     |
| BAPX1    |
| BARD1    |
| BASP1    |
| BAT1     |
| BAT2     |
| BAT2D1   |
| BAT2L    |
| BAT3     |
| BAT4     |
| BAT5     |
| BAX      |
| BAZ1A    |
| BAZ1B    |
| BAZ2B    |
| BBC3     |
| BBS1     |
| BBS10    |
| BBS12    |
| BBS2     |
| BBS4     |
| BBS7     |
| BBS9     |
| BBX      |
| BCAP29   |
| BCAP31   |
| BCAR1    |
| BCAR3    |
| BCAS2    |
| BCAS4    |
| BCAT1    |
| BCAT2    |

|         |
|---------|
| BCCIP   |
| BCDIN3D |
| BCHE    |
| BCKDHA  |
| BCKDHB  |
| BCKDK   |
| BCL11A  |
| BCL11B  |
| BCL2    |
| BCL2L1  |
| BCL2L11 |
| BCL2L12 |
| BCL2L13 |
| BCL2L2  |
| BCL3    |
| BCL6    |
| BCL7A   |
| BCL7B   |
| BCL7C   |
| BCL9    |
| BCL9L   |
| BCLAF1  |
| BCOR    |
| BCORL1  |
| BCR     |
| BCS1L   |
| BCYRN1  |
| BDNF    |
| BECN1   |
| BEGAIN  |
| BEND3   |
| BEND4   |
| BEND5   |
| BEND7   |
| BET1    |
| BET1L   |
| BEX1    |
| BEX2    |
| BEX4    |
| BEX5    |
| BEXL1   |
| BFAR    |
| BGLAP   |
| BGN     |
| BHLHB2  |
| BHLHB9  |
| BICD1   |
| BICD2   |
| BID     |
| BIK     |

|         |
|---------|
| BIN1    |
| BIN3    |
| BIRC2   |
| BIRC3   |
| BIRC5   |
| BIRC6   |
| BIVM    |
| BLCAP   |
| BLM     |
| BLMH    |
| BLOC1S1 |
| BLOC1S2 |
| BLVRA   |
| BLVRB   |
| BLZF1   |
| BMF     |
| BMI1    |
| BMP1    |
| BMP2    |
| BMP2K   |
| BMP4    |
| BMP5    |
| BMP6    |
| BMP7    |
| BMP8B   |
| BMPER   |
| BMPR1A  |
| BMPR2   |
| BMS1    |
| BMS1P5  |
| BNC2    |
| BNIP1   |
| BNIP2   |
| BNIP3   |
| BNIP3L  |
| BNIPL   |
| BOAT    |
| BOK     |
| BOLA1   |
| BOLA2   |
| BOLA3   |
| BOP1    |
| BP75    |
| BPGM    |
| BPHL    |
| BPNT1   |
| BPTF    |
| BRAF    |
| BRCA1   |
| BRCC3   |



|        |
|--------|
| BRD1   |
| BRD2   |
| BRD3   |
| BRD7   |
| BRD7P2 |
| BRD8   |
| BRD9   |
| BRE    |
| BRF1   |
| BRF2   |
| BRI3   |
| BRI3BP |
| BRI3P1 |
| BRIX1  |
| BRMS1  |
| BRMS1L |
| BRP44  |
| BRP44L |
| BRPF1  |
| BRPF3  |
| BRSK1  |
| BRSK2  |
| BRWD1  |
| BRWD2  |
| BRWD3  |
| BSCL2  |
| BSDC1  |
| BSG    |
| BSN    |
| BSPRY  |
| BST2   |
| BTAF1  |
| BTBD1  |
| BTBD10 |
| BTBD12 |
| BTBD15 |
| BTBD2  |
| BTBD3  |
| BTBD6  |
| BTBD7  |
| BTD    |
| BTF3   |
| BTF3L4 |
| BTG1   |
| BTG2   |
| BTG3   |
| BTN2A1 |
| BTN2A2 |
| BTN3A1 |
| BTRC   |

|           |
|-----------|
| BUB1      |
| BUB1B     |
| BUB3      |
| BUD13     |
| BUD31     |
| BVES      |
| BYSL      |
| BZW2      |
| C10orf104 |
| C10orf114 |
| C10orf118 |
| C10orf119 |
| C10orf12  |
| C10orf125 |
| C10orf137 |
| C10orf140 |
| C10orf2   |
| C10orf26  |
| C10orf28  |
| C10orf32  |
| C10orf33  |
| C10orf35  |
| C10orf4   |
| C10orf47  |
| C10orf51  |
| C10orf57  |
| C10orf58  |
| C10orf59  |
| C10orf6   |
| C10orf61  |
| C10orf75  |
| C10orf76  |
| C10orf78  |
| C10orf82  |
| C10orf84  |
| C10orf88  |
| C11orf1   |
| C11orf10  |
| C11orf17  |
| C11orf2   |
| C11orf24  |
| C11orf35  |
| C11orf46  |
| C11orf47  |
| C11orf48  |
| C11orf49  |
| C11orf51  |
| C11orf54  |
| C11orf57  |
| C11orf58  |

|          |
|----------|
| C11orf59 |
| C11orf60 |
| C11orf61 |
| C11orf63 |
| C11orf67 |
| C11orf68 |
| C11orf70 |
| C11orf73 |
| C11orf74 |
| C11orf75 |
| C11orf80 |
| C11orf82 |
| C11orf83 |
| C11orf84 |
| C11orf9  |
| C12orf10 |
| C12orf11 |
| C12orf23 |
| C12orf24 |
| C12orf26 |
| C12orf29 |
| C12orf30 |
| C12orf31 |
| C12orf32 |
| C12orf35 |
| C12orf4  |
| C12orf41 |
| C12orf43 |
| C12orf44 |
| C12orf45 |
| C12orf47 |
| C12orf48 |
| C12orf49 |
| C12orf5  |
| C12orf51 |
| C12orf52 |
| C12orf57 |
| C12orf60 |
| C12orf62 |
| C12orf64 |
| C12orf65 |
| C12orf66 |
| C12orf68 |
| C12orf76 |
| C12orf77 |
| C13orf1  |
| C13orf15 |
| C13orf18 |
| C13orf23 |
| C13orf25 |

|           |
|-----------|
| C13orf27  |
| C13orf3   |
| C13orf34  |
| C13orf37  |
| C13orf7   |
| C14orf100 |
| C14orf102 |
| C14orf104 |
| C14orf106 |
| C14orf109 |
| C14orf112 |
| C14orf118 |
| C14orf124 |
| C14orf125 |
| C14orf129 |
| C14orf131 |
| C14orf132 |
| C14orf133 |
| C14orf135 |
| C14orf138 |
| C14orf139 |
| C14orf142 |
| C14orf143 |
| C14orf145 |
| C14orf147 |
| C14orf149 |
| C14orf153 |
| C14orf156 |
| C14orf159 |
| C14orf166 |
| C14orf167 |
| C14orf169 |
| C14orf173 |
| C14orf174 |
| C14orf179 |
| C14orf181 |
| C14orf19  |
| C14orf2   |
| C14orf28  |
| C14orf32  |
| C14orf37  |
| C14orf4   |
| C14orf43  |
| C14orf45  |
| C14orf78  |
| C14orf79  |
| C14orf80  |
| C14orf82  |
| C14orf85  |
| C14orf93  |

|           |
|-----------|
| C15orf17  |
| C15orf20  |
| C15orf21  |
| C15orf23  |
| C15orf24  |
| C15orf27  |
| C15orf28  |
| C15orf29  |
| C15orf33  |
| C15orf38  |
| C15orf39  |
| C15orf40  |
| C15orf41  |
| C15orf42  |
| C15orf44  |
| C15orf57  |
| C15orf63  |
| C16orf13  |
| C16orf33  |
| C16orf35  |
| C16orf42  |
| C16orf48  |
| C16orf5   |
| C16orf52  |
| C16orf53  |
| C16orf56  |
| C16orf57  |
| C16orf58  |
| C16orf59  |
| C16orf61  |
| C16orf62  |
| C16orf63  |
| C16orf67  |
| C16orf68  |
| C16orf7   |
| C16orf70  |
| C16orf72  |
| C16orf74  |
| C16orf75  |
| C16orf79  |
| C16orf80  |
| C16orf86  |
| C16orf87  |
| C16orf88  |
| C16orf91  |
| C16orf93  |
| C17orf100 |
| C17orf101 |
| C17orf106 |
| C17orf28  |

|          |
|----------|
| C17orf37 |
| C17orf39 |
| C17orf41 |
| C17orf42 |
| C17orf44 |
| C17orf45 |
| C17orf47 |
| C17orf48 |
| C17orf49 |
| C17orf51 |
| C17orf53 |
| C17orf56 |
| C17orf58 |
| C17orf59 |
| C17orf61 |
| C17orf62 |
| C17orf63 |
| C17orf65 |
| C17orf68 |
| C17orf69 |
| C17orf70 |
| C17orf71 |
| C17orf78 |
| C17orf79 |
| C17orf80 |
| C17orf81 |
| C17orf85 |
| C17orf88 |
| C17orf89 |
| C17orf90 |
| C17orf91 |
| C17orf95 |
| C17orf96 |
| C17orf97 |
| C17orf98 |
| C18orf10 |
| C18orf18 |
| C18orf21 |
| C18orf22 |
| C18orf25 |
| C18orf26 |
| C18orf32 |
| C18orf45 |
| C18orf54 |
| C18orf55 |
| C18orf56 |
| C18orf8  |
| C19orf10 |
| C19orf12 |
| C19orf2  |

|           |
|-----------|
| C19orf20  |
| C19orf22  |
| C19orf24  |
| C19orf25  |
| C19orf28  |
| C19orf29  |
| C19orf30  |
| C19orf31  |
| C19orf33  |
| C19orf38  |
| C19orf39  |
| C19orf40  |
| C19orf42  |
| C19orf43  |
| C19orf44  |
| C19orf46  |
| C19orf47  |
| C19orf48  |
| C19orf50  |
| C19orf52  |
| C19orf53  |
| C19orf54  |
| C19orf56  |
| C19orf6   |
| C19orf60  |
| C19orf61  |
| C19orf62  |
| C19orf63  |
| C19orf64  |
| C19orf70  |
| C1D       |
| C1GALT1   |
| C1GALT1C1 |
| C1orf102  |
| C1orf104  |
| C1orf106  |
| C1orf107  |
| C1orf109  |
| C1orf112  |
| C1orf115  |
| C1orf116  |
| C1orf122  |
| C1orf123  |
| C1orf124  |
| C1orf128  |
| C1orf130  |
| C1orf131  |
| C1orf133  |
| C1orf135  |
| C1orf144  |

|          |
|----------|
| C1orf149 |
| C1orf151 |
| C1orf152 |
| C1orf156 |
| C1orf159 |
| C1orf162 |
| C1orf163 |
| C1orf165 |
| C1orf166 |
| C1orf172 |
| C1orf174 |
| C1orf187 |
| C1orf19  |
| C1orf190 |
| C1orf198 |
| C1orf201 |
| C1orf203 |
| C1orf21  |
| C1orf212 |
| C1orf216 |
| C1orf218 |
| C1orf24  |
| C1orf25  |
| C1orf26  |
| C1orf31  |
| C1orf35  |
| C1orf41  |
| C1orf43  |
| C1orf50  |
| C1orf52  |
| C1orf53  |
| C1orf54  |
| C1orf55  |
| C1orf56  |
| C1orf57  |
| C1orf59  |
| C1orf61  |
| C1orf63  |
| C1orf66  |
| C1orf69  |
| C1orf71  |
| C1orf74  |
| C1orf77  |
| C1orf83  |
| C1orf85  |
| C1orf86  |
| C1orf88  |
| C1orf89  |
| C1orf9   |
| C1orf91  |



|           |
|-----------|
| C1orf93   |
| C1orf96   |
| C1orf97   |
| C1QBP     |
| C1QTNF6   |
| C1RL      |
| C1S       |
| C20orf100 |
| C20orf108 |
| C20orf11  |
| C20orf111 |
| C20orf117 |
| C20orf12  |
| C20orf127 |
| C20orf160 |
| C20orf177 |
| C20orf191 |
| C20orf194 |
| C20orf196 |
| C20orf199 |
| C20orf20  |
| C20orf24  |
| C20orf27  |
| C20orf29  |
| C20orf3   |
| C20orf30  |
| C20orf4   |
| C20orf43  |
| C20orf45  |
| C20orf46  |
| C20orf52  |
| C20orf55  |
| C20orf56  |
| C20orf7   |
| C20orf72  |
| C20orf75  |
| C20orf94  |
| C21orf122 |
| C21orf124 |
| C21orf126 |
| C21orf129 |
| C21orf2   |
| C21orf24  |
| C21orf30  |
| C21orf33  |
| C21orf37  |
| C21orf45  |
| C21orf51  |
| C21orf55  |
| C21orf56  |

|          |
|----------|
| C21orf57 |
| C21orf58 |
| C21orf59 |
| C21orf66 |
| C21orf7  |
| C21orf70 |
| C21orf81 |
| C21orf91 |
| C22orf13 |
| C22orf25 |
| C22orf28 |
| C22orf29 |
| C22orf30 |
| C22orf32 |
| C22orf33 |
| C22orf36 |
| C22orf39 |
| C22orf40 |
| C22orf9  |
| C2CD2    |
| C2orf15  |
| C2orf18  |
| C2orf21  |
| C2orf24  |
| C2orf25  |
| C2orf28  |
| C2orf29  |
| C2orf30  |
| C2orf34  |
| C2orf37  |
| C2orf42  |
| C2orf43  |
| C2orf44  |
| C2orf47  |
| C2orf49  |
| C2orf56  |
| C2orf63  |
| C2orf64  |
| C2orf68  |
| C2orf69  |
| C2orf7   |
| C2orf76  |
| C2orf79  |
| C2orf82  |
| C3orf1   |
| C3orf10  |
| C3orf14  |
| C3orf17  |
| C3orf18  |
| C3orf19  |

|         |
|---------|
| C3orf21 |
| C3orf23 |
| C3orf26 |
| C3orf31 |
| C3orf33 |
| C3orf34 |
| C3orf37 |
| C3orf38 |
| C3orf39 |
| C3orf50 |
| C3orf52 |
| C3orf58 |
| C3orf59 |
| C3orf63 |
| C3orf64 |
| C3orf67 |
| C3orf72 |
| C3orf75 |
| C4A     |
| C4orf10 |
| C4orf14 |
| C4orf18 |
| C4orf23 |
| C4orf27 |
| C4orf29 |
| C4orf31 |
| C4orf33 |
| C4orf34 |
| C4orf41 |
| C4orf43 |
| C4orf46 |
| C4orf48 |
| C4orf49 |
| C5      |
| C5orf13 |
| C5orf15 |
| C5orf21 |
| C5orf22 |
| C5orf24 |
| C5orf25 |
| C5orf28 |
| C5orf30 |
| C5orf32 |
| C5orf33 |
| C5orf34 |
| C5orf35 |
| C5orf37 |
| C5orf39 |
| C5orf4  |
| C5orf41 |

|          |
|----------|
| C5orf42  |
| C5orf44  |
| C5orf5   |
| C5orf51  |
| C5orf53  |
| C5orf54  |
| C5orf62  |
| C6orf1   |
| C6orf106 |
| C6orf108 |
| C6orf111 |
| C6orf115 |
| C6orf117 |
| C6orf120 |
| C6orf124 |
| C6orf125 |
| C6orf129 |
| C6orf130 |
| C6orf132 |
| C6orf134 |
| C6orf136 |
| C6orf138 |
| C6orf141 |
| C6orf145 |
| C6orf148 |
| C6orf153 |
| C6orf160 |
| C6orf162 |
| C6orf163 |
| C6orf167 |
| C6orf168 |
| C6orf170 |
| C6orf173 |
| C6orf182 |
| C6orf192 |
| C6orf203 |
| C6orf211 |
| C6orf225 |
| C6orf26  |
| C6orf47  |
| C6orf48  |
| C6orf52  |
| C6orf54  |
| C6orf57  |
| C6orf59  |
| C6orf61  |
| C6orf62  |
| C6orf64  |
| C6orf66  |
| C6orf70  |

|           |
|-----------|
| C6orf72   |
| C6orf85   |
| C6orf89   |
| C7orf10   |
| C7orf11   |
| C7orf13   |
| C7orf20   |
| C7orf23   |
| C7orf25   |
| C7orf26   |
| C7orf27   |
| C7orf28A  |
| C7orf28B  |
| C7orf29   |
| C7orf30   |
| C7orf36   |
| C7orf38   |
| C7orf40   |
| C7orf41   |
| C7orf42   |
| C7orf43   |
| C7orf44   |
| C7orf47   |
| C7orf49   |
| C7orf50   |
| C7orf54   |
| C7orf55   |
| C7orf59   |
| C7orf63   |
| C7orf68   |
| C7orf70   |
| C8orf33   |
| C8orf37   |
| C8orf38   |
| C8orf40   |
| C8orf41   |
| C8orf42   |
| C8orf45   |
| C8orf48   |
| C8orf55   |
| C8orf58   |
| C8orf59   |
| C8orf76   |
| C8orf83   |
| C9orf100  |
| C9orf102  |
| C9orf103  |
| C9orf100S |
| C9orf114  |
| C9orf116  |

|          |
|----------|
| C9orf119 |
| C9orf123 |
| C9orf126 |
| C9orf127 |
| C9orf130 |
| C9orf135 |
| C9orf140 |
| C9orf142 |
| C9orf156 |
| C9orf16  |
| C9orf167 |
| C9orf169 |
| C9orf21  |
| C9orf23  |
| C9orf25  |
| C9orf30  |
| C9orf37  |
| C9orf40  |
| C9orf45  |
| C9orf46  |
| C9orf5   |
| C9orf58  |
| C9orf6   |
| C9orf61  |
| C9orf64  |
| C9orf69  |
| C9orf7   |
| C9orf72  |
| C9orf75  |
| C9orf78  |
| C9orf80  |
| C9orf82  |
| C9orf85  |
| C9orf86  |
| C9orf89  |
| C9orf9   |
| C9orf90  |
| C9orf91  |
| C9orf93  |
| C9orf95  |
| CA11     |
| CA13     |
| CA14     |
| CA2      |
| CA4      |
| CA5B     |
| CAB39    |
| CAB39L   |
| CABC1    |
| CABIN1   |

|           |
|-----------|
| CABLES1   |
| CABLES2   |
| CABYR     |
| CACHD1    |
| CACNA1C   |
| CACNA1H   |
| CACNA2D2  |
| CACNB2    |
| CACNB3    |
| CACNG6    |
| CACYBP    |
| CAD       |
| CADM1     |
| CADM4     |
| CADPS2    |
| CALB2     |
| CALCB     |
| CALCOCO1  |
| CALCOCO2  |
| CALD1     |
| CALHM2    |
| CALM1     |
| CALM2     |
| CALM3     |
| CALML4    |
| CALN1     |
| CALR      |
| CALU      |
| CAMK2D    |
| CAMK2G    |
| CAMK2N1   |
| CAMKK2    |
| CAMLG     |
| CAMSAP1   |
| CAMSAP1L1 |
| CAMTA1    |
| CAND1     |
| CAND2     |
| CANT1     |
| CANX      |
| CAP1      |
| CAP2      |
| CAPG      |
| CAPN1     |
| CAPN12    |
| CAPN13    |
| CAPN2     |
| CAPN5     |
| CAPN6     |
| CAPN7     |

|            |
|------------|
| CAPNS1     |
| CAPRN1     |
| CAPRN2     |
| CAPS       |
| CAPS2      |
| CAPZA1     |
| CAPZA2     |
| CAPZB      |
| CARD10     |
| CARD11     |
| CARD14     |
| CARD8      |
| CARHSP1    |
| CARKD      |
| CARM1      |
| CARS       |
| CARS2      |
| CART1      |
| CASC3      |
| CASC4      |
| CASC5      |
| CASD1      |
| CASK       |
| CASKIN2    |
| CASP2      |
| CASP3      |
| CASP6      |
| CASP7      |
| CASP9      |
| CAST       |
| CASZ1      |
| CAT        |
| CATSPER2   |
| CATSPER2P1 |
| CAV1       |
| CAV2       |
| CBARA1     |
| CBFA2T2    |
| CBFB       |
| CBL        |
| CBLB       |
| CBLC       |
| CBLL1      |
| CBLN3      |
| CBR1       |
| CBR3       |
| CBR4       |
| CBS        |
| CBWD1      |
| CBWD3      |



|          |
|----------|
| CBWD5    |
| CBX1     |
| CBX2     |
| CBX3     |
| CBX4     |
| CBX5     |
| CBX6     |
| CBX7     |
| CBY1     |
| CC2D1A   |
| CC2D1B   |
| CC2D2A   |
| CCAR1    |
| CCBE1    |
| CCBL1    |
| CCBL2    |
| CCDC101  |
| CCDC102A |
| CCDC104  |
| CCDC105  |
| CCDC106  |
| CCDC107  |
| CCDC109A |
| CCDC109B |
| CCDC112  |
| CCDC113  |
| CCDC115  |
| CCDC117  |
| CCDC12   |
| CCDC120  |
| CCDC121  |
| CCDC123  |
| CCDC124  |
| CCDC125  |
| CCDC127  |
| CCDC128  |
| CCDC130  |
| CCDC132  |
| CCDC135  |
| CCDC136  |
| CCDC137  |
| CCDC138  |
| CCDC14   |
| CCDC15   |
| CCDC150  |
| CCDC151  |
| CCDC152  |
| CCDC16   |
| CCDC18   |
| CCDC21   |

|         |
|---------|
| CCDC22  |
| CCDC23  |
| CCDC24  |
| CCDC25  |
| CCDC28A |
| CCDC28B |
| CCDC3   |
| CCDC34  |
| CCDC41  |
| CCDC43  |
| CCDC45  |
| CCDC46  |
| CCDC47  |
| CCDC49  |
| CCDC5   |
| CCDC50  |
| CCDC51  |
| CCDC53  |
| CCDC55  |
| CCDC56  |
| CCDC58  |
| CCDC59  |
| CCDC6   |
| CCDC64B |
| CCDC66  |
| CCDC69  |
| CCDC71  |
| CCDC72  |
| CCDC74B |
| CCDC76  |
| CCDC77  |
| CCDC8   |
| CCDC84  |
| CCDC85B |
| CCDC86  |
| CCDC88C |
| CCDC9   |
| CCDC90A |
| CCDC90B |
| CCDC91  |
| CCDC92  |
| CCDC93  |
| CCDC94  |
| CCDC97  |
| CCDC99  |
| CCHCR1  |
| CCKBR   |
| CCL2    |
| CCL5    |
| CCM2    |

|          |
|----------|
| CCNA1    |
| CCNA2    |
| CCNB1    |
| CCNB1IP1 |
| CCNB2    |
| CCNC     |
| CCND1    |
| CCND2    |
| CCND3    |
| CCNDBP1  |
| CCNE1    |
| CCNE2    |
| CCNF     |
| CCNG1    |
| CCNG2    |
| CCNH     |
| CCNI     |
| CCNI2    |
| CCNJL    |
| CCNK     |
| CCNL1    |
| CCNL2    |
| CCNO     |
| CCNT1    |
| CCNT2    |
| CCNY     |
| CCNYL1   |
| CCPG1    |
| CCR6     |
| CCRK     |
| CCRN4L   |
| CCS      |
| CCT2     |
| CCT3     |
| CCT4     |
| CCT5     |
| CCT6A    |
| CCT6B    |
| CCT6P1   |
| CCT7     |
| CCT8     |
| CD14     |
| CD151    |
| CD164    |
| CD1D     |
| CD24     |
| CD248    |
| CD276    |
| CD2AP    |
| CD2BP2   |

|          |
|----------|
| CD320    |
| CD34     |
| CD44     |
| CD46     |
| CD47     |
| CD52     |
| CD55     |
| CD58     |
| CD59     |
| CD63     |
| CD68     |
| CD72     |
| CD74     |
| CD79A    |
| CD79B    |
| CD81     |
| CD82     |
| CD83     |
| CD86     |
| CD9      |
| CD97     |
| CD99     |
| CD99L2   |
| CDAN1    |
| CDC123   |
| CDC14A   |
| CDC14B   |
| CDC16    |
| CDC2     |
| CDC20    |
| CDC23    |
| CDC25A   |
| CDC25B   |
| CDC25C   |
| CDC26    |
| CDC2L1   |
| CDC2L2   |
| CDC2L5   |
| CDC2L6   |
| CDC34    |
| CDC37    |
| CDC40    |
| CDC42    |
| CDC42BPA |
| CDC42BPB |
| CDC42EP1 |
| CDC42EP2 |
| CDC42EP4 |
| CDC42EP5 |
| CDC42SE1 |

|            |
|------------|
| CDC42SE2   |
| CDC45L     |
| CDC5L      |
| CDC7       |
| CDCA1      |
| CDCA2      |
| CDCA3      |
| CDCA4      |
| CDCA5      |
| CDCA7      |
| CDCA7L     |
| CDCA8      |
| CDCP1      |
| CDH1       |
| CDH10      |
| CDH11      |
| CDH13      |
| CDH2       |
| CDH24      |
| CDH3       |
| CDH6       |
| CDIPT      |
| CDK10      |
| CDK2       |
| CDK2AP1    |
| CDK2AP2    |
| CDK3       |
| CDK4       |
| CDK5       |
| CDK5R1     |
| CDK5RAP1   |
| CDK5RAP2   |
| CDK5RAP3   |
| CDK6       |
| CDK7       |
| CDK9       |
| CDKAL1     |
| CDKL2      |
| CDKL3      |
| CDKN1A     |
| CDKN1B     |
| CDKN1C     |
| CDKN2AIP   |
| CDKN2AIPNL |
| CDKN2D     |
| CDKN3      |
| CDO1       |
| CDR2       |
| CDR2L      |
| CDRT4      |

|         |
|---------|
| CDS1    |
| CDS2    |
| CDT1    |
| CDV3    |
| CDX1    |
| CDX2    |
| CDYL    |
| CEBPA   |
| CEBPB   |
| CEBPD   |
| CEBPG   |
| CEBPZ   |
| CECR1   |
| CECR5   |
| CECR6   |
| CECR7   |
| CEL     |
| CELSR2  |
| CELSR3  |
| CEMP1   |
| CENPA   |
| CENPB   |
| CENPBD1 |
| CENPC1  |
| CENPE   |
| CENPF   |
| CENPH   |
| CENPI   |
| CENPJ   |
| CENPK   |
| CENPL   |
| CENPM   |
| CENPN   |
| CENPO   |
| CENPP   |
| CENPQ   |
| CENPT   |
| CENPV   |
| CENTA1  |
| CENTB2  |
| CENTD2  |
| CENTG2  |
| CENTG3  |
| CEP110  |
| CEP135  |
| CEP152  |
| CEP164  |
| CEP192  |
| CEP250  |
| CEP27   |

|         |
|---------|
| CEP290  |
| CEP350  |
| CEP55   |
| CEP57   |
| CEP63   |
| CEP68   |
| CEP70   |
| CEP72   |
| CEP78   |
| CEPT1   |
| CERCAM  |
| CERK    |
| CES1    |
| CES2    |
| CES3    |
| CETN2   |
| CETN3   |
| CFD     |
| CFDP1   |
| CFI     |
| CFL1    |
| CFL2    |
| CFLAR   |
| CFTR    |
| CGGBP1  |
| CGI-96  |
| CGN     |
| CGNL1   |
| CGRRF1  |
| CHAC1   |
| CHAF1A  |
| CHAF1B  |
| CHCHD1  |
| CHCHD10 |
| CHCHD2  |
| CHCHD3  |
| CHCHD4  |
| CHCHD5  |
| CHCHD6  |
| CHCHD7  |
| CHCHD8  |
| CHCHD9  |
| CHD1    |
| CHD1L   |
| CHD2    |
| CHD3    |
| CHD4    |
| CHD6    |
| CHD7    |
| CHD8    |

|         |
|---------|
| CHD9    |
| CHDH    |
| CHEK1   |
| CHEK2   |
| CHERP   |
| CHES1   |
| CHFR    |
| CHI3L1  |
| CHIC2   |
| CHKA    |
| CHKB    |
| CHM     |
| CHML    |
| CHMP1A  |
| CHMP1B  |
| CHMP2A  |
| CHMP2B  |
| CHMP4A  |
| CHMP4B  |
| CHMP4C  |
| CHMP5   |
| CHMP6   |
| CHMP7   |
| CHN1    |
| CHN2    |
| CHORDC1 |
| CHP     |
| CHPF    |
| CHPF2   |
| CHPT1   |
| CHRAC1  |
| CHRM3   |
| CHRNA3  |
| CHRNA5  |
| CHRN1   |
| CHST10  |
| CHST12  |
| CHST13  |
| CHST14  |
| CHST15  |
| CHST2   |
| CHST3   |
| CHST7   |
| CHST9   |
| CHSY1   |
| CHSY3   |
| CHTF18  |
| CHUK    |
| CHURC1  |
| CIAO1   |



|             |
|-------------|
| CIAPIN1     |
| CIB1        |
| CIB2        |
| CIC         |
| CICE        |
| CICK0721Q.1 |
| CINP        |
| CIP29       |
| CIR1        |
| CIRBP       |
| CIRH1A      |
| CISD1       |
| CISD2       |
| CISD3       |
| CITED2      |
| CITED4      |
| CIZ1        |
| CKAP2       |
| CKAP2L      |
| CKAP4       |
| CKAP5       |
| CKB         |
| CKLF        |
| CKMT1A      |
| CKMT1B      |
| CKS1B       |
| CKS2        |
| CLASP1      |
| CLASP2      |
| CLCC1       |
| CLCF1       |
| CLCN2       |
| CLCN3       |
| CLCN5       |
| CLCN6       |
| CLCN7       |
| CLCNKA      |
| CLDN1       |
| CLDN10      |
| CLDN11      |
| CLDN12      |
| CLDN14      |
| CLDN15      |
| CLDN19      |
| CLDN20      |
| CLDN23      |
| CLDN3       |
| CLDN4       |
| CLDN6       |
| CLDN7       |

|         |
|---------|
| CLDND1  |
| CLDND2  |
| CLEC11A |
| CLEC16A |
| CLEC2D  |
| CLEC4A  |
| CLIC1   |
| CLIC4   |
| CLIC6   |
| CLINT1  |
| CLIP1   |
| CLIP2   |
| CLIP3   |
| CLK1    |
| CLK2    |
| CLK3    |
| CLK4    |
| CLMN    |
| CLN3    |
| CLN5    |
| CLN6    |
| CLN8    |
| CLNS1A  |
| CLOCK   |
| CLP1    |
| CLPP    |
| CLPTM1  |
| CLPTM1L |
| CLPX    |
| CLRN1   |
| CLSTN1  |
| CLSTN3  |
| CLTA    |
| CLTB    |
| CLTC    |
| CLTCL1  |
| CLUAP1  |
| CLYBL   |
| CMAS    |
| CMBL    |
| CMC1    |
| CMIP    |
| CMPK1   |
| CMTM3   |
| CMTM4   |
| CMTM6   |
| CMTM7   |
| CMTM8   |
| CMYA5   |
| CNBP    |

|         |
|---------|
| CNDP2   |
| CNFN    |
| CNGB1   |
| CNIH    |
| CNIH2   |
| CNIH4   |
| CNKSR1  |
| CNKSR3  |
| CNN2    |
| CNN3    |
| CNNM3   |
| CNNM4   |
| CNO     |
| CNOT1   |
| CNOT10  |
| CNOT2   |
| CNOT3   |
| CNOT4   |
| CNOT6   |
| CNOT6L  |
| CNOT7   |
| CNOT8   |
| CNPY2   |
| CNPY3   |
| CNPY4   |
| CNRIP1  |
| CNTRF   |
| CNTLN   |
| CNTN1   |
| CNTNAP1 |
| CNTNAP2 |
| CNTNAP5 |
| CNTROB  |
| COASY   |
| COBL    |
| COBLL1  |
| COBRA1  |
| COCH    |
| COG1    |
| COG2    |
| COG3    |
| COG4    |
| COG5    |
| COG6    |
| COG7    |
| COG8    |
| COIL    |
| COL11A1 |
| COL11A2 |
| COL12A1 |

|          |
|----------|
| COL13A1  |
| COL16A1  |
| COL17A1  |
| COL18A1  |
| COL1A1   |
| COL1A2   |
| COL22A1  |
| COL23A1  |
| COL2A1   |
| COL3A1   |
| COL4A1   |
| COL4A2   |
| COL4A3BP |
| COL4A5   |
| COL4A6   |
| COL5A1   |
| COL5A2   |
| COL6A1   |
| COL6A2   |
| COL6A3   |
| COL7A1   |
| COL8A2   |
| COL9A2   |
| COL9A3   |
| COLEC12  |
| COLQ     |
| COMMD1   |
| COMMD10  |
| COMMD2   |
| COMMD3   |
| COMMD4   |
| COMMD5   |
| COMMD6   |
| COMMD7   |
| COMMD8   |
| COMMD9   |
| COMT     |
| COMTD1   |
| COPA     |
| COPB1    |
| COPB2    |
| COPE     |
| COPG     |
| COPG2    |
| COPG2IT1 |
| COPS2    |
| COPS3    |
| COPS4    |
| COPS5    |
| COPS6    |

|         |
|---------|
| COPS7A  |
| COPS7B  |
| COPS8   |
| COPZ1   |
| COQ10A  |
| COQ10B  |
| COQ2    |
| COQ3    |
| COQ4    |
| COQ5    |
| COQ6    |
| COQ7    |
| COQ9    |
| CORO1B  |
| CORO1C  |
| CORO2A  |
| CORO7   |
| COTL1   |
| COX10   |
| COX11   |
| COX15   |
| COX17   |
| COX19   |
| COX4I1  |
| COX4NB  |
| COX5A   |
| COX5B   |
| COX6A1  |
| COX6B1  |
| COX6C   |
| COX7A2  |
| COX7A2L |
| COX7B   |
| COX7C   |
| COX8A   |
| CP110   |
| CPD     |
| CPE     |
| CPEB2   |
| CPEB3   |
| CPM     |
| CPN2    |
| CPNE1   |
| CPNE3   |
| CPNE8   |
| CPOX    |
| CPS1    |
| CPSF1   |
| CPSF2   |
| CPSF3   |

|          |
|----------|
| CPSF3L   |
| CPSF4    |
| CPSF6    |
| CPT1A    |
| CPT1B    |
| CPT2     |
| CPVL     |
| CPXM1    |
| CPXM2    |
| CPZ      |
| CRABP1   |
| CRABP2   |
| CRADD    |
| CRAMP1L  |
| CRAT     |
| CRB3     |
| CRBN     |
| CRCP     |
| CREB1    |
| CREB3    |
| CREB3L2  |
| CREB3L4  |
| CREB5    |
| CREBBP   |
| CREBL1   |
| CREBL2   |
| CREBZF   |
| CREG1    |
| CRELD1   |
| CRELD2   |
| CRHBP    |
| CRHR1    |
| CRIP1    |
| CRIP2    |
| CRIPAK   |
| CRIPT    |
| CRISPLD1 |
| CRISPLD2 |
| CRK      |
| CRKL     |
| CRKRS    |
| CRLF3    |
| CRLS1    |
| CRMP1    |
| CRNKL1   |
| CROCC    |
| CROP     |
| CROT     |
| CRSP2    |
| CRSP6    |

|          |
|----------|
| CRSP9    |
| CRTAP    |
| CRTC2    |
| CRTC3    |
| CRY1     |
| CRY2     |
| CRYGS    |
| CRYL1    |
| CRYM     |
| CRYZ     |
| CRYZL1   |
| CS       |
| CSAD     |
| CSDA     |
| CSDE1    |
| CSE1L    |
| CSF2RA   |
| CSHL1    |
| CSK      |
| CSNK1A1  |
| CSNK1D   |
| CSNK1E   |
| CSNK1G1  |
| CSNK1G2  |
| CSNK1G3  |
| CSNK2A1  |
| CSNK2A1P |
| CSNK2A2  |
| CSNK2B   |
| CSPP1    |
| CSRNP2   |
| CSRP1    |
| CSRP2    |
| CSRP2BP  |
| CST1     |
| CST3     |
| CST4     |
| CSTB     |
| CSTF2    |
| CSTF2T   |
| CSTF3    |
| CTAGE6   |
| CTBP1    |
| CTBP2    |
| CTBS     |
| CTCF     |
| CTDP1    |
| CTDSP1   |
| CTDSP2   |
| CTDSPL   |

|           |
|-----------|
| CTDSPL2   |
| CTF1      |
| CTGF      |
| CTGLF3    |
| CTGLF7    |
| CTH       |
| CTHRC1    |
| CTNNA1    |
| CTNNAL1   |
| CTNNB1    |
| CTNNBIP1  |
| CTNNBL1   |
| CTNND1    |
| CTNND2    |
| CTNS      |
| CTPS      |
| CTPS2     |
| CTR9      |
| CTSA      |
| CTSB      |
| CTSC      |
| CTSD      |
| CTSH      |
| CTSK      |
| CTSL1     |
| CTSL2     |
| CTSZ      |
| CTTN      |
| CTTNBP2NL |
| CTU2      |
| CTXN1     |
| CUEDC1    |
| CUEDC2    |
| CUGBP1    |
| CUL1      |
| CUL2      |
| CUL4A     |
| CUL4B     |
| CUL5      |
| CUL7      |
| CUL9      |
| CUTA      |
| CUTC      |
| CUTL1     |
| CUX1      |
| CWC15     |
| CWC22     |
| CWF19L1   |
| CWF19L2   |
| CX3CL1    |



|          |
|----------|
| CXADR    |
| CXCL12   |
| CXCL14   |
| CXCL16   |
| CXCR7    |
| CXorf12  |
| CXorf23  |
| CXorf26  |
| CXorf36  |
| CXorf38  |
| CXorf39  |
| CXorf40A |
| CXorf40B |
| CXorf45  |
| CXorf57  |
| CXorf64  |
| CXXC1    |
| CXXC4    |
| CXXC5    |
| CXXC6    |
| CYB561   |
| CYB561D1 |
| CYB561D2 |
| CYB5A    |
| CYB5B    |
| CYB5D1   |
| CYB5D2   |
| CYB5R1   |
| CYB5R2   |
| CYB5R3   |
| CYB5R4   |
| CYB5RL   |
| CYBA     |
| CYBASC3  |
| CYBRD1   |
| CYC1     |
| CYCS     |
| CYCSL1   |
| CYFIP1   |
| CYFIP2   |
| CYGB     |
| CYHR1    |
| CYLD     |
| CYLN2    |
| CYorf14  |
| CYorf15A |
| CYorf15B |
| CYP11A1  |
| CYP1B1   |
| CYP20A1  |

|         |
|---------|
| CYP26A1 |
| CYP27A1 |
| CYP27C1 |
| CYP2C8  |
| CYP2E1  |
| CYP2J2  |
| CYP2R1  |
| CYP2S1  |
| CYP2U1  |
| CYP4X1  |
| CYP51A1 |
| CYR61   |
| CYTH1   |
| CYTH2   |
| CYTH3   |
| CY TSA  |
| CY TSB  |
| CY YR1  |
| D2HGDH  |
| D4S234E |
| DAAM1   |
| DAAM2   |
| DAB2    |
| DAB2IP  |
| DACH1   |
| DACT1   |
| DACT2   |
| DACT3   |
| DAD1    |
| DAD1L   |
| DAG1    |
| DAGLA   |
| DAGLB   |
| DAK     |
| DAP     |
| DAP3    |
| DAPK1   |
| DAPK3   |
| DAPP1   |
| DARS    |
| DARS2   |
| DAXX    |
| DAZAP1  |
| DAZAP2  |
| DBC1    |
| DBI     |
| DBN1    |
| DBNDD1  |
| DBNDD2  |
| DBNL    |

|         |
|---------|
| DBP     |
| DBR1    |
| DBT     |
| DCAF10  |
| DCAF15  |
| DCAF16  |
| DCAF6   |
| DCAF7   |
| DCAKD   |
| DCBLD1  |
| DCBLD2  |
| DCHS1   |
| DCI     |
| DCK     |
| DCLK1   |
| DCLK3   |
| DCLRE1A |
| DCLRE1B |
| DCLRE1C |
| DCN     |
| DCP1A   |
| DCP1B   |
| DCP2    |
| DCPS    |
| DCTD    |
| DCTN1   |
| DCTN2   |
| DCTN3   |
| DCTN4   |
| DCTN5   |
| DCTN6   |
| DCTPP1  |
| DCUN1D1 |
| DCUN1D2 |
| DCUN1D3 |
| DCUN1D4 |
| DCUN1D5 |
| DCXR    |
| DDA1    |
| DDAH1   |
| DDAH2   |
| DDB1    |
| DDB2    |
| DDEF2   |
| DDHD2   |
| DDIT3   |
| DDIT4   |
| DDIT4L  |
| DDOST   |
| DDR1    |

|              |
|--------------|
| DDR2         |
| DDRGK1       |
| DDT          |
| DDX1         |
| DDX10        |
| DDX11        |
| DDX12        |
| DDX17        |
| DDX18        |
| DDX19A       |
| DDX19B       |
| DDX19-DDX19C |
| DDX21        |
| DDX23        |
| DDX24        |
| DDX27        |
| DDX28        |
| DDX31        |
| DDX39        |
| DDX3X        |
| DDX3Y        |
| DDX41        |
| DDX42        |
| DDX46        |
| DDX47        |
| DDX49        |
| DDX5         |
| DDX50        |
| DDX51        |
| DDX52        |
| DDX54        |
| DDX55        |
| DDX56        |
| DDX58        |
| DDX59        |
| DEAF1        |
| DECR1        |
| DECR2        |
| DEDD         |
| DEDD2        |
| DEF6         |
| DEF8         |
| DEGS1        |
| DEK          |
| DEM1         |
| DENND1A      |
| DENND2A      |
| DENND2C      |
| DENND4A      |
| DENND4B      |

|         |
|---------|
| DENND4C |
| DENND5A |
| DENND5B |
| DENR    |
| DEPDC1  |
| DEPDC1B |
| DEPDC5  |
| DEPDC6  |
| DERA    |
| DERL1   |
| DERL2   |
| DET1    |
| DEXI    |
| DFFA    |
| DFFB    |
| DFNA5   |
| DFNB31  |
| DFNB59  |
| DGAT1   |
| DGAT2   |
| DGCR11  |
| DGCR14  |
| DGCR2   |
| DGCR6   |
| DGCR6L  |
| DGCR8   |
| DGKA    |
| DGKD    |
| DGKQ    |
| DGUOK   |
| DHCR24  |
| DHCR7   |
| DHDDS   |
| DHDH    |
| DHFRL1  |
| DHPS    |
| DHRS1   |
| DHRS11  |
| DHRS12  |
| DHRS13  |
| DHRS2   |
| DHRS3   |
| DHRS4   |
| DHRS4L2 |
| DHRS7   |
| DHRS7B  |
| DHRSX   |
| DHTKD1  |
| DHX15   |
| DHX16   |

|              |
|--------------|
| DHX29        |
| DHX30        |
| DHX32        |
| DHX33        |
| DHX34        |
| DHX35        |
| DHX36        |
| DHX37        |
| DHX38        |
| DHX40        |
| DHX57        |
| DHX8         |
| DHX9         |
| DIABLO       |
| DIAPH1       |
| DIAPH2       |
| DIAPH3       |
| DICER1       |
| DIDO1        |
| DIMT1L       |
| DIO2         |
| DIO3         |
| DIO3OS       |
| DIP2A        |
| DIP2B        |
| DIP2C        |
| DIRC2        |
| DIS3L        |
| DIS3L2       |
| DISP1        |
| DIXDC1       |
| dJ341D10.1   |
| DKC1         |
| DKFZp434K19  |
| DKFZp434N03  |
| DKFZp451M21  |
| DKFZP564O05  |
| DKFZP586I142 |
| DKFZp667M24  |
| DKFZp686I152 |
| DKFZp686O24  |
| DKFZp761P04  |
| DKK1         |
| DKK3         |
| DKKL1        |
| DLAT         |
| DLD          |
| DLEU1        |
| DLEU2        |
| DLG2         |

|         |
|---------|
| DLG3    |
| DLG4    |
| DLG5    |
| DLGAP4  |
| DLGAP5  |
| DLK1    |
| DLK2    |
| DLL1    |
| DLL3    |
| DLST    |
| DLX3    |
| DLX5    |
| DMAP1   |
| DMC1    |
| DMD     |
| DMKN    |
| DMRTA1  |
| DMTF1   |
| DMWD    |
| DMXL1   |
| DNA2    |
| DNAH1   |
| DNAH14  |
| DNAH2   |
| DNAJA1  |
| DNAJA2  |
| DNAJA3  |
| DNAJA4  |
| DNAJB1  |
| DNAJB11 |
| DNAJB12 |
| DNAJB14 |
| DNAJB2  |
| DNAJB5  |
| DNAJB6  |
| DNAJB9  |
| DNAJC1  |
| DNAJC10 |
| DNAJC13 |
| DNAJC14 |
| DNAJC15 |
| DNAJC17 |
| DNAJC18 |
| DNAJC19 |
| DNAJC2  |
| DNAJC21 |
| DNAJC24 |
| DNAJC25 |
| DNAJC27 |
| DNAJC3  |

|          |
|----------|
| DNAJC30  |
| DNAJC4   |
| DNAJC5   |
| DNAJC7   |
| DNAJC8   |
| DNAJC9   |
| DNAL1    |
| DNAL4    |
| DNALI1   |
| DNASE1   |
| DNASE1L1 |
| DNASE2   |
| DNCL1    |
| DNLZ     |
| DNM1L    |
| DNM2     |
| DNMT1    |
| DNMT3B   |
| DNPEP    |
| DNTTIP1  |
| DNTTIP2  |
| DOCK1    |
| DOCK11   |
| DOCK2    |
| DOCK3    |
| DOCK6    |
| DOCK7    |
| DOCK8    |
| DOHH     |
| DOK4     |
| DOLK     |
| DOLPP1   |
| DOM3Z    |
| DONSON   |
| DOPEY1   |
| DOPEY2   |
| DOT1L    |
| DPAGT1   |
| DPF2     |
| DPH2     |
| DPH3     |
| DPH5     |
| DPM1     |
| DPM2     |
| DPM3     |
| DPP10    |
| DPP3     |
| DPP4     |
| DPP7     |
| DPP8     |



|         |
|---------|
| DPP9    |
| DPPA2   |
| DPPA3   |
| DPPA4   |
| DPY19L1 |
| DPY19L4 |
| DPY30   |
| DPYSL2  |
| DPYSL3  |
| DPYSL4  |
| DR1     |
| DRAM1   |
| DRAP1   |
| DRD1IP  |
| DRD4    |
| DRG1    |
| DRG2    |
| DSC2    |
| DSC3    |
| DSCAM   |
| DSCC1   |
| DSCR10  |
| DSCR1L1 |
| DSCR3   |
| DSCR6   |
| DSE     |
| DSEL    |
| DSG2    |
| DSN1    |
| DSP     |
| DSTN    |
| DSTYK   |
| DTD1    |
| DTL     |
| DTNA    |
| DTNB    |
| DTNBP1  |
| DTWD1   |
| DTWD2   |
| DTX2    |
| DTX3    |
| DULLARD |
| DUS1L   |
| DUS2L   |
| DUS3L   |
| DUS4L   |
| DUSP1   |
| DUSP10  |
| DUSP11  |
| DUSP12  |

|          |
|----------|
| DUSP13   |
| DUSP14   |
| DUSP15   |
| DUSP16   |
| DUSP18   |
| DUSP19   |
| DUSP2    |
| DUSP22   |
| DUSP23   |
| DUSP28   |
| DUSP3    |
| DUSP5    |
| DUSP6    |
| DUSP8    |
| DUT      |
| DUXAP3   |
| DVL1     |
| DVL2     |
| DVL3     |
| DYDC2    |
| DYM      |
| DYNC1H1  |
| DYNC1I1  |
| DYNC1I2  |
| DYNC1LI2 |
| DYNC2H1  |
| DYNC2LI1 |
| DYNLL1   |
| DYNLL2   |
| DYNLRB1  |
| DYNLT1   |
| DYNLT3   |
| DYRK1A   |
| DYRK1B   |
| DYRK2    |
| DYRK4    |
| DYSF     |
| DZIP1L   |
| E2F1     |
| E2F2     |
| E2F3     |
| E2F4     |
| E2F5     |
| E2F6     |
| E2F7     |
| E4F1     |
| EAF1     |
| EAF2     |
| EAPP     |
| EARS2    |

|          |
|----------|
| EBAG9    |
| EBF4     |
| EBNA1BP2 |
| EBP      |
| EBPL     |
| ECD      |
| ECE2     |
| ECGF1    |
| ECH1     |
| ECHDC1   |
| ECHDC2   |
| ECHDC3   |
| ECHS1    |
| ECOP     |
| ECSIT    |
| ECT2     |
| EDARADD  |
| EDC3     |
| EDC4     |
| EDEM1    |
| EDEM2    |
| EDEM3    |
| EDF1     |
| EDG1     |
| EDG4     |
| EDN1     |
| EDNRA    |
| EDNRB    |
| EEA1     |
| EED      |
| EEF1A1   |
| EEF1A2   |
| EEF1AL7  |
| EEF1B2   |
| EEF1D    |
| EEF1E1   |
| EEF1G    |
| EEF2     |
| EEF2K    |
| EFCAB4A  |
| EFCAB7   |
| EFEMP1   |
| EFEMP2   |
| EFHA1    |
| EFHB     |
| EFHC1    |
| EFHD1    |
| EFHD2    |
| EFNA1    |
| EFNA4    |

|         |
|---------|
| EFNB1   |
| EFNB2   |
| EFNB3   |
| EFR3A   |
| EFR3B   |
| EFS     |
| EFTUD1  |
| EFTUD2  |
| EGFL7   |
| EGFLAM  |
| EGFR    |
| EGLN1   |
| EGLN2   |
| EGLN3   |
| EGOT    |
| EGR1    |
| EHBP1   |
| EHBP1L1 |
| EHD1    |
| EHD2    |
| EHD3    |
| EHD4    |
| EHMT1   |
| EHMT2   |
| EI24    |
| EID1    |
| EID2    |
| EID2B   |
| EIF1    |
| EIF1AD  |
| EIF1AX  |
| EIF1AY  |
| EIF1B   |
| EIF2A   |
| EIF2AK1 |
| EIF2AK2 |
| EIF2AK3 |
| EIF2AK4 |
| EIF2B1  |
| EIF2B2  |
| EIF2B3  |
| EIF2B4  |
| EIF2B5  |
| EIF2C1  |
| EIF2C2  |
| EIF2C3  |
| EIF2C4  |
| EIF2S1  |
| EIF2S2  |
| EIF2S3  |

|           |
|-----------|
| EIF3A     |
| EIF3B     |
| EIF3C     |
| EIF3D     |
| EIF3E     |
| EIF3F     |
| EIF3G     |
| EIF3H     |
| EIF3I     |
| EIF3J     |
| EIF3K     |
| EIF3L     |
| EIF3M     |
| EIF4A1    |
| EIF4A2    |
| EIF4A3    |
| EIF4B     |
| EIF4E     |
| EIF4E2    |
| EIF4E3    |
| EIF4EBP1  |
| EIF4EBP2  |
| EIF4EBP3  |
| EIF4ENIF1 |
| EIF4G1    |
| EIF4G2    |
| EIF4G3    |
| EIF4H     |
| EIF5      |
| EIF5A     |
| EIF5A2    |
| EIF5B     |
| EIF6      |
| ELAC2     |
| ELAVL1    |
| ELF1      |
| ELF2      |
| ELF3      |
| ELF4      |
| ELK1      |
| ELK4      |
| ELL       |
| ELL2      |
| ELL3      |
| ELMO1     |
| ELMO2     |
| ELMO3     |
| ELMOD2    |
| ELMOD3    |
| ELOF1     |

|         |
|---------|
| ELOVL1  |
| ELOVL4  |
| ELOVL5  |
| ELOVL6  |
| ELP2    |
| ELP3    |
| ELP4    |
| EMD     |
| EME1    |
| EMG1    |
| EMID1   |
| EMID2   |
| EMILIN2 |
| EML1    |
| EML2    |
| EML3    |
| EML4    |
| EMP1    |
| EMP3    |
| EMX2OS  |
| ENAH    |
| ENC1    |
| ENDOD1  |
| ENDOG   |
| ENG     |
| ENHO    |
| ENO1    |
| ENO2    |
| ENO3    |
| ENOPH1  |
| ENOSF1  |
| ENOX2   |
| ENPEP   |
| ENPP1   |
| ENPP2   |
| ENPP4   |
| ENPP5   |
| ENSA    |
| ENTPD3  |
| ENTPD4  |
| ENTPD5  |
| ENTPD6  |
| ENTPD7  |
| ENY2    |
| EOMES   |
| EP300   |
| EP400   |
| EPAS1   |
| EPB41L1 |
| EPB41L2 |

|          |
|----------|
| EPB41L3  |
| EPB41L4A |
| EPB41L4B |
| EPB41L5  |
| EPB49    |
| EPC2     |
| EPCAM    |
| EPDR1    |
| EPHA1    |
| EPHA10   |
| EPHA2    |
| EPHA4    |
| EPHA8    |
| EPHB1    |
| EPHB2    |
| EPHB3    |
| EPHB4    |
| EPHB6    |
| EPHX1    |
| EPHX2    |
| EPM2A    |
| EPM2AIP1 |
| EPN1     |
| EPN2     |
| EPOR     |
| EPPB9    |
| EPR1     |
| EPRS     |
| EPS15    |
| EPS15L1  |
| EPS8     |
| EPS8L1   |
| EPSTI1   |
| ERAL1    |
| ERBB2    |
| ERBB3    |
| ERC1     |
| ERC2     |
| ERCC1    |
| ERCC2    |
| ERCC3    |
| ERCC5    |
| ERCC6L   |
| ERCC8    |
| ERF      |
| ERGIC1   |
| ERGIC2   |
| ERGIC3   |
| ERH      |
| ERI1     |

|         |
|---------|
| ERI2    |
| ERI3    |
| ERICH1  |
| ERLIN1  |
| ERLIN2  |
| ERMAP   |
| ERMP1   |
| ERN1    |
| ERO1L   |
| ERP27   |
| ERP29   |
| ERRFI1  |
| ERVWE1  |
| ESAM    |
| ESCO1   |
| ESD     |
| ESPL1   |
| ESPN    |
| ESRRA   |
| ESRRAP2 |
| ESRRG   |
| ESYT1   |
| ETF1    |
| ETFA    |
| ETFB    |
| ETFDH   |
| ETNK1   |
| ETNK2   |
| ETS1    |
| ETS2    |
| ETV3    |
| ETV4    |
| ETV5    |
| ETV6    |
| EVC     |
| EVI2A   |
| EVI5    |
| EVI5L   |
| EVL     |
| EWSR1   |
| EXD2    |
| EXO1    |
| EXOC1   |
| EXOC2   |
| EXOC3   |
| EXOC4   |
| EXOC5   |
| EXOC6   |
| EXOC7   |
| EXOSC1  |



|          |
|----------|
| EXOSC10  |
| EXOSC2   |
| EXOSC3   |
| EXOSC4   |
| EXOSC5   |
| EXOSC6   |
| EXOSC7   |
| EXOSC8   |
| EXOSC9   |
| EXPH5    |
| EXT1     |
| EXT2     |
| EXTL2    |
| EXTL3    |
| EYA1     |
| EYA2     |
| EYA3     |
| EYS      |
| EZH2     |
| EZR      |
| F10      |
| F11R     |
| F12      |
| F2R      |
| F2RL1    |
| F3       |
| F8A1     |
| FAAH     |
| FAAH2    |
| FABP5    |
| FABP5L2  |
| FABP7    |
| FADD     |
| FADS1    |
| FADS2    |
| FADS3    |
| FAF1     |
| FAF2     |
| FAH      |
| FAHD1    |
| FAHD2A   |
| FAHD2B   |
| FAIM     |
| FAM100A  |
| FAM100B  |
| FAM102A  |
| FAM102B  |
| FAM103A1 |
| FAM104A  |
| FAM104B  |

|           |
|-----------|
| FAM105A   |
| FAM105B   |
| FAM107B   |
| FAM108A2  |
| FAM108A3  |
| FAM108B1  |
| FAM108C1  |
| FAM109A   |
| FAM10A4   |
| FAM10A7   |
| FAM110A   |
| FAM110B   |
| FAM111A   |
| FAM113A   |
| FAM113B   |
| FAM114A1  |
| FAM114A2  |
| FAM115A   |
| FAM116A   |
| FAM116B   |
| FAM117A   |
| FAM117B   |
| FAM118A   |
| FAM118B   |
| FAM119A   |
| FAM119B   |
| FAM120A   |
| FAM120AOS |
| FAM120B   |
| FAM122A   |
| FAM122B   |
| FAM123A   |
| FAM125A   |
| FAM125B   |
| FAM126A   |
| FAM126B   |
| FAM127A   |
| FAM127B   |
| FAM127C   |
| FAM128A   |
| FAM129A   |
| FAM129B   |
| FAM131A   |
| FAM133B   |
| FAM134A   |
| FAM134B   |
| FAM134C   |
| FAM135A   |
| FAM136A   |
| FAM136B   |

|          |
|----------|
| FAM13A   |
| FAM13B   |
| FAM149A  |
| FAM149B1 |
| FAM14B   |
| FAM153B  |
| FAM156A  |
| FAM156B  |
| FAM158A  |
| FAM160A2 |
| FAM160B1 |
| FAM160B2 |
| FAM161A  |
| FAM162A  |
| FAM162B  |
| FAM164A  |
| FAM164C  |
| FAM165B  |
| FAM168B  |
| FAM171A1 |
| FAM172A  |
| FAM173A  |
| FAM173B  |
| FAM174A  |
| FAM174B  |
| FAM175A  |
| FAM175B  |
| FAM176B  |
| FAM177A1 |
| FAM178A  |
| FAM179B  |
| FAM181B  |
| FAM184A  |
| FAM188A  |
| FAM189B  |
| FAM18B   |
| FAM18B2  |
| FAM190B  |
| FAM193A  |
| FAM193B  |
| FAM195A  |
| FAM195B  |
| FAM19A4  |
| FAM20A   |
| FAM20B   |
| FAM20C   |
| FAM21D   |
| FAM24B   |
| FAM26E   |
| FAM30A   |

|         |
|---------|
| FAM32A  |
| FAM35A  |
| FAM36A  |
| FAM38A  |
| FAM38B  |
| FAM39DP |
| FAM39E  |
| FAM3A   |
| FAM3B   |
| FAM3C   |
| FAM40A  |
| FAM40B  |
| FAM43A  |
| FAM44B  |
| FAM45A  |
| FAM45B  |
| FAM46A  |
| FAM46B  |
| FAM46C  |
| FAM48A  |
| FAM49A  |
| FAM49B  |
| FAM50A  |
| FAM53B  |
| FAM53C  |
| FAM54A  |
| FAM54B  |
| FAM57A  |
| FAM58A  |
| FAM59A  |
| FAM60A  |
| FAM62B  |
| FAM63A  |
| FAM63B  |
| FAM64A  |
| FAM65A  |
| FAM65B  |
| FAM69A  |
| FAM69B  |
| FAM70A  |
| FAM70B  |
| FAM71E1 |
| FAM72A  |
| FAM72B  |
| FAM72D  |
| FAM73A  |
| FAM73B  |
| FAM75B  |
| FAM75C1 |
| FAM76B  |

|          |
|----------|
| FAM80B   |
| FAM82A2  |
| FAM82B   |
| FAM83B   |
| FAM83D   |
| FAM83F   |
| FAM83H   |
| FAM84B   |
| FAM86A   |
| FAM86B1  |
| FAM86C   |
| FAM86D   |
| FAM89A   |
| FAM89B   |
| FAM8A1   |
| FAM90A2P |
| FAM90A3  |
| FAM92A1  |
| FAM96A   |
| FAM96B   |
| FAM98A   |
| FAM98C   |
| FANCB    |
| FANCC    |
| FANCD2   |
| FANCE    |
| FANCG    |
| FANCI    |
| FANCL    |
| FAR1     |
| FAR2     |
| FARP1    |
| FARS2    |
| FARSA    |
| FARSLB   |
| FASN     |
| FASTK    |
| FASTKD1  |
| FASTKD2  |
| FASTKD3  |
| FASTKD5  |
| FAT1     |
| FAT3     |
| FAU      |
| FBL      |
| FBLIM1   |
| FBLN1    |
| FBLN2    |
| FBLN5    |
| FBN2     |

|        |
|--------|
| FBN3   |
| FBP1   |
| FBRS   |
| FBS1   |
| FBXL10 |
| FBXL11 |
| FBXL12 |
| FBXL14 |
| FBXL15 |
| FBXL16 |
| FBXL18 |
| FBXL2  |
| FBXL20 |
| FBXL5  |
| FBXL6  |
| FBXL7  |
| FBXO10 |
| FBXO11 |
| FBXO15 |
| FBXO16 |
| FBXO17 |
| FBXO18 |
| FBXO2  |
| FBXO21 |
| FBXO22 |
| FBXO28 |
| FBXO3  |
| FBXO30 |
| FBXO31 |
| FBXO32 |
| FBXO33 |
| FBXO34 |
| FBXO36 |
| FBXO38 |
| FBXO42 |
| FBXO44 |
| FBXO45 |
| FBXO46 |
| FBXO5  |
| FBXO6  |
| FBXO7  |
| FBXO8  |
| FBXW11 |
| FBXW2  |
| FBXW4  |
| FBXW5  |
| FBXW7  |
| FBXW8  |
| FBXW9  |
| FCAR   |

|          |
|----------|
| FCF1     |
| FCGR2B   |
| FCGR3A   |
| FCGR3B   |
| FCGRT    |
| FCHO2    |
| FCHSD2   |
| FDFT1    |
| FDPS     |
| FDX1     |
| FDX1L    |
| FDXR     |
| FECH     |
| FEM1A    |
| FEM1B    |
| FEM1C    |
| FEN1     |
| FER      |
| FER1L3   |
| FER1L4   |
| FERMT1   |
| FERMT2   |
| FES      |
| FEZ1     |
| FEZ2     |
| FGA      |
| FGD1     |
| FGD3     |
| FGD5     |
| FGD6     |
| FGF11    |
| FGF13    |
| FGF18    |
| FGF2     |
| FGF23    |
| FGFR1OP  |
| FGFR1OP2 |
| FGFR3    |
| FGFR4    |
| FGFRL1   |
| FGGY     |
| FGL1     |
| FGL2     |
| FGR      |
| FH       |
| FHDC1    |
| FHIT     |
| FHL1     |
| FHL2     |
| FHL3     |

|          |
|----------|
| FHOD1    |
| FHOD3    |
| FIBCD1   |
| FIBP     |
| FICD     |
| FIG4     |
| FIGNL1   |
| FIGNL2   |
| FILIP1   |
| FILIP1L  |
| FIP1L1   |
| FIS1     |
| FIZ1     |
| FJX1     |
| FKBP10   |
| FKBP11   |
| FKBP14   |
| FKBP15   |
| FKBP1A   |
| FKBP1B   |
| FKBP1P1  |
| FKBP2    |
| FKBP3    |
| FKBP4    |
| FKBP5    |
| FKBP8    |
| FKBP9L   |
| FKBPL    |
| FKRP     |
| FKSG30   |
| FKTN     |
| FLAD1    |
| FLII     |
| FLJ10081 |
| FLJ10213 |
| FLJ10357 |
| FLJ10374 |
| FLJ10781 |
| FLJ10916 |
| FLJ10986 |
| FLJ10996 |
| FLJ11235 |
| FLJ11783 |
| FLJ12078 |
| FLJ12355 |
| FLJ12684 |
| FLJ12949 |
| FLJ13305 |
| FLJ14107 |
| FLJ14166 |



|          |
|----------|
| FLJ14213 |
| FLJ14712 |
| FLJ20021 |
| FLJ20125 |
| FLJ20209 |
| FLJ20254 |
| FLJ20273 |
| FLJ20444 |
| FLJ20489 |
| FLJ20628 |
| FLJ20674 |
| FLJ20699 |
| FLJ20718 |
| FLJ20850 |
| FLJ20920 |
| FLJ21865 |
| FLJ22184 |
| FLJ22222 |
| FLJ22531 |
| FLJ22536 |
| FLJ22662 |
| FLJ22795 |
| FLJ23584 |
| FLJ25006 |
| FLJ25363 |
| FLJ30092 |
| FLJ30428 |
| FLJ31306 |
| FLJ31568 |
| FLJ32011 |
| FLJ32810 |
| FLJ33996 |
| FLJ34047 |
| FLJ35024 |
| FLJ35220 |
| FLJ35390 |
| FLJ35767 |
| FLJ35934 |
| FLJ36070 |
| FLJ36131 |
| FLJ37396 |
| FLJ37453 |
| FLJ38482 |
| FLJ38717 |
| FLJ38973 |
| FLJ39653 |
| FLJ39660 |
| FLJ39827 |
| FLJ40113 |
| FLJ40504 |

|          |
|----------|
| FLJ40722 |
| FLJ40852 |
| FLJ42258 |
| FLJ42627 |
| FLJ42957 |
| FLJ43681 |
| FLJ44054 |
| FLJ44124 |
| FLJ44342 |
| FLJ45032 |
| FLJ45202 |
| FLJ45244 |
| FLJ45256 |
| FLJ45337 |
| FLJ46309 |
| FLJ46552 |
| FLJ46906 |
| FLJ90086 |
| FLJ90757 |
| FLNA     |
| FLNB     |
| FLNC     |
| FLOT1    |
| FLOT2    |
| FLRT2    |
| FLRT3    |
| FLVCR1   |
| FLVCR2   |
| FLYWCH1  |
| FLYWCH2  |
| FMNL1    |
| FMNL2    |
| FMO4     |
| FMO5     |
| FMO6P    |
| FMOD     |
| FN3KRP   |
| FNBP1    |
| FNBP1L   |
| FNBP4    |
| FNDC3A   |
| FNDC3B   |
| FNDC4    |
| FNDC5    |
| FNIP1    |
| FNIP2    |
| FNTA     |
| FNTB     |
| FOLR1    |
| FOS      |

|         |
|---------|
| FOSL1   |
| FOSL2   |
| FOXA1   |
| FOXA2   |
| FOXA3   |
| FOXC1   |
| FOXC2   |
| FOXD1   |
| FOXD4L4 |
| FOXH1   |
| FOXJ2   |
| FOXJ3   |
| FOXK1   |
| FOXK2   |
| FOXM1   |
| FOXN2   |
| FOXO1   |
| FOXO3   |
| FOXO4   |
| FOXP1   |
| FOXP4   |
| FOXQ1   |
| FOXRED1 |
| FOXRED2 |
| FRAG1   |
| FRAP1   |
| FRAS1   |
| FRAT2   |
| FREM1   |
| FREM2   |
| FREQ    |
| FRG1    |
| FRMD4A  |
| FRMD6   |
| FRMD8   |
| FRMPD3  |
| FRRS1   |
| FRS3    |
| FRYL    |
| FRZB    |
| FSBP    |
| FSCN1   |
| FSD1    |
| FST     |
| FSTL1   |
| FSTL3   |
| FTH1    |
| FTHL11  |
| FTHL12  |
| FTHL16  |

|        |
|--------|
| FTHL2  |
| FTHL3  |
| FTHL7  |
| FTHL8  |
| FTL    |
| FTO    |
| FTSJ1  |
| FTSJ2  |
| FTSJ3  |
| FTSJD1 |
| FTSJD2 |
| FUBP1  |
| FUBP3  |
| FUCA1  |
| FUCA2  |
| FUK    |
| FUNDC1 |
| FURIN  |
| FUS    |
| FUT1   |
| FUT10  |
| FUT11  |
| FUT4   |
| FUT6   |
| FUT8   |
| FUZ    |
| FVT1   |
| FXC1   |
| FXR1   |
| FXR2   |
| FXYD1  |
| FXYD5  |
| FXYD6  |
| FYCO1  |
| FYN    |
| FYTTD1 |
| FZD1   |
| FZD2   |
| FZD3   |
| FZD4   |
| FZD5   |
| FZD6   |
| FZD7   |
| FZD8   |
| FZR1   |
| G3BP1  |
| G3BP2  |
| G6PC3  |
| G6PD   |
| GAA    |

|            |
|------------|
| GAB1       |
| GAB2       |
| GABARAP    |
| GABARAPL1  |
| GABARAPL2  |
| GABBR1     |
| GABPA      |
| GABPB1     |
| GABPB2     |
| GABRB3     |
| GABRE      |
| GABRG2     |
| GABRP      |
| GAD1       |
| GADD45A    |
| GADD45B    |
| GADD45G    |
| GADD45GIP1 |
| GAK        |
| GAL        |
| GAL3ST1    |
| GAL3ST4    |
| GALC       |
| GALE       |
| GALK1      |
| GALK2      |
| GALM       |
| GALNS      |
| GALNT1     |
| GALNT10    |
| GALNT11    |
| GALNT12    |
| GALNT2     |
| GALNT3     |
| GALNT4     |
| GALNT6     |
| GALNTL1    |
| GALNTL4    |
| GALR2      |
| GALT       |
| GAMT       |
| GAN        |
| GANAB      |
| GAPDH      |
| GAPDHL6    |
| GAPVD1     |
| GAR1       |
| GARNL4     |
| GARS       |
| GART       |

|         |
|---------|
| GAS1    |
| GAS2L3  |
| GAS6    |
| GAS7    |
| GAS8    |
| GATA2   |
| GATA3   |
| GATA4   |
| GATA6   |
| GATAD1  |
| GATAD2A |
| GATAD2B |
| GATC    |
| GATM    |
| GATS    |
| GBA     |
| GBA2    |
| GBAS    |
| GBE1    |
| GBF1    |
| GBGT1   |
| GBP4    |
| GCA     |
| GCAT    |
| GCC1    |
| GCC2    |
| GCDH    |
| GCET2   |
| GCGR    |
| GCH1    |
| GCHFR   |
| GCLC    |
| GCLM    |
| GCN1L1  |
| GCNT1   |
| GCNT2   |
| GCSH    |
| GDAP2   |
| GDE1    |
| GDF11   |
| GDF15   |
| GDF3    |
| GDF5OS  |
| GDI1    |
| GDI2    |
| GDPD1   |
| GDPD3   |
| GDPD5   |
| GEMIN4  |
| GEMIN5  |

|        |
|--------|
| GEMIN6 |
| GEMIN8 |
| GEN1   |
| GFER   |
| GFM1   |
| GFM2   |
| GFOD1  |
| GFOD2  |
| GFPT1  |
| GFPT2  |
| GFRA2  |
| GGA1   |
| GGA2   |
| GGA3   |
| GGCT   |
| GGCX   |
| GGH    |
| GGNBP2 |
| GGPS1  |
| GGTL3  |
| GGTLC1 |
| GHITM  |
| GHR    |
| GINS2  |
| GINS3  |
| GINS4  |
| GIPC1  |
| GIT1   |
| GIT2   |
| GIYD1  |
| GIYD2  |
| GJA1   |
| GJC1   |
| GJC2   |
| GJC3   |
| GK5    |
| GKAP1  |
| GLA    |
| GLB1   |
| GLB1L  |
| GLB1L2 |
| GLCE   |
| GLDC   |
| GLDN   |
| GLE1   |
| GLG1   |
| GLI3   |
| GLI4   |
| GLIPR2 |
| GLIS3  |

|         |
|---------|
| GLMN    |
| GLO1    |
| GLOD4   |
| GLRX    |
| GLRX2   |
| GLRX3   |
| GLRX5   |
| GLS     |
| GLS2    |
| GLT25D1 |
| GLT8D1  |
| GLT8D2  |
| GLTP    |
| GLTPD1  |
| GLTSCR1 |
| GLTSCR2 |
| GLUD1   |
| GLYCTK  |
| gm127   |
| GM2A    |
| GMCL1   |
| GMDS    |
| GMEB1   |
| GMEB2   |
| GMFB    |
| GMIP    |
| GMNN    |
| GMPPA   |
| GMPPB   |
| GMPR    |
| GMPR2   |
| GMPS    |
| GNA11   |
| GNA12   |
| GNA13   |
| GNAI1   |
| GNAI2   |
| GNAI3   |
| GNAS    |
| GNB1    |
| GNB1L   |
| GNB2    |
| GNB2L1  |
| GNB4    |
| GNB5    |
| GNE     |
| GNG10   |
| GNG11   |
| GNG2    |
| GNG4    |



|         |
|---------|
| GNG5    |
| GNG7    |
| GNG8    |
| GNGT1   |
| GNL1    |
| GNL2    |
| GNL3    |
| GNL3L   |
| GNPAT   |
| GNPDA1  |
| GNPDA2  |
| GNPNAT1 |
| GNPTAB  |
| GNPTG   |
| GNRH1   |
| GNS     |
| GOLGA1  |
| GOLGA2  |
| GOLGA3  |
| GOLGA4  |
| GOLGA5  |
| GOLGA6B |
| GOLGA7  |
| GOLGA8A |
| GOLGA8B |
| GOLGA9P |
| GOLGB1  |
| GOLIM4  |
| GOLM1   |
| GOLPH3  |
| GOLPH3L |
| GOLPH4  |
| GOLT1A  |
| GOLT1B  |
| GON4L   |
| GOPC    |
| GORASP1 |
| GORASP2 |
| GOSR1   |
| GOSR2   |
| GOT1    |
| GOT2    |
| GP1BA   |
| GPA33   |
| GPAA1   |
| GPAM    |
| GPATCH1 |
| GPATCH2 |
| GPATCH3 |
| GPATCH4 |

|         |
|---------|
| GPATCH8 |
| GPBP1   |
| GPBP1L1 |
| GPC1    |
| GPC2    |
| GPC3    |
| GPC4    |
| GPC6    |
| GPD1L   |
| GPER    |
| GPHN    |
| GPI     |
| GPKOW   |
| GPM6A   |
| GPM6B   |
| GPN1    |
| GPN2    |
| GPN3    |
| GPR1    |
| GPR108  |
| GPR114  |
| GPR125  |
| GPR126  |
| GPR128  |
| GPR137  |
| GPR137B |
| GPR137C |
| GPR143  |
| GPR153  |
| GPR160  |
| GPR161  |
| GPR162  |
| GPR172A |
| GPR175  |
| GPR177  |
| GPR180  |
| GPR19   |
| GPR3    |
| GPR37   |
| GPR56   |
| GPR64   |
| GPR84   |
| GPR89A  |
| GPR89B  |
| GPR89C  |
| GPR98   |
| GPRASP2 |
| GPRC5B  |
| GPRC5C  |
| GPS1    |

|         |
|---------|
| GPS2    |
| GPSM1   |
| GPSM2   |
| GPSM3   |
| GPT2    |
| GPX1    |
| GPX2    |
| GPX3    |
| GPX4    |
| GPX7    |
| GPX8    |
| GRAMD1A |
| GRAMD1B |
| GRAMD3  |
| GRAMD4  |
| GRB10   |
| GRB14   |
| GRB2    |
| GRB7    |
| GREB1   |
| GREM2   |
| GRHL2   |
| GRHPR   |
| GRIN3B  |
| GRINA   |
| GRIP2   |
| GRIPAP1 |
| GRK5    |
| GRK6    |
| GRM2    |
| GRN     |
| GRPEL1  |
| GRPEL2  |
| GRPR    |
| GRSF1   |
| GRTP1   |
| GRWD1   |
| GSDMB   |
| GSDMD   |
| GSG2    |
| GSK3B   |
| GSN     |
| GSPT1   |
| GSPT2   |
| GSR     |
| GSS     |
| GSTA4   |
| GSTCD   |
| GSTK1   |
| GSTM1   |

|           |
|-----------|
| GSTM2     |
| GSTM4     |
| GSTO1     |
| GSTO2     |
| GSTP1     |
| GSTT1     |
| GSTTP2    |
| GSTZ1     |
| GTDC1     |
| GTF2A1    |
| GTF2A2    |
| GTF2B     |
| GTF2E1    |
| GTF2E2    |
| GTF2F1    |
| GTF2F2    |
| GTF2H1    |
| GTF2H2B   |
| GTF2H3    |
| GTF2H4    |
| GTF2H5    |
| GTF2I     |
| GTF2IP1   |
| GTF2IRD1  |
| GTF2IRD2B |
| GTF3A     |
| GTF3C1    |
| GTF3C2    |
| GTF3C3    |
| GTF3C5    |
| GTF3C6    |
| GTPBP1    |
| GTPBP10   |
| GTPBP2    |
| GTPBP3    |
| GTPBP4    |
| GTPBP6    |
| GTPBP8    |
| GTSE1     |
| GUCA1A    |
| GUCA1B    |
| GUCY1A3   |
| GUF1      |
| GUK1      |
| GUSB      |
| GUSBL1    |
| GUSBL2    |
| GXYLT1    |
| GYG1      |
| GYG2      |

|         |
|---------|
| GYLTL1B |
| GYPE    |
| GYS1    |
| H19     |
| H1F0    |
| H1FX    |
| H2AFJ   |
| H2AFV   |
| H2AFX   |
| H2AFY   |
| H2AFY2  |
| H2AFZ   |
| H3F3A   |
| H3F3B   |
| H6PD    |
| HABP2   |
| HABP4   |
| HACE1   |
| HACL1   |
| HADH    |
| HADH2   |
| HADHA   |
| HADHB   |
| HAGH    |
| HAGHL   |
| HAND1   |
| HAND2   |
| HAPLN1  |
| HAPLN2  |
| HAPLN4  |
| HARBI1  |
| HARS    |
| HARS2   |
| HAS2    |
| HAS2AS  |
| HAS3    |
| HAT1    |
| HAUS4   |
| HAUS5   |
| HAUS6   |
| HAUS8   |
| HAVCR2  |
| HAX1    |
| HBA2    |
| HBEGF   |
| HBG2    |
| HBP1    |
| HBQ1    |
| HBXIP   |
| HCCA2   |

|         |
|---------|
| HCCS    |
| HCFC1   |
| HCFC1R1 |
| HCFC2   |
| HCG2P7  |
| HCG4    |
| HCN3    |
| HCP5    |
| HCST    |
| HDAC1   |
| HDAC11  |
| HDAC2   |
| HDAC3   |
| HDAC4   |
| HDAC6   |
| HDAC7   |
| HDAC7A  |
| HDAC9   |
| HDDC2   |
| HDDC3   |
| HDGF    |
| HDGF2   |
| HDGFRP3 |
| HDHD1A  |
| HDHD2   |
| HDHD3   |
| HEATR1  |
| HEATR2  |
| HEATR3  |
| HEATR5A |
| HEATR5B |
| HEATR6  |
| HEBP1   |
| HEBP2   |
| HECA    |
| HECTD1  |
| HECTD2  |
| HECTD3  |
| HECW2   |
| HEG1    |
| HELLS   |
| HELQ    |
| HELZ    |
| HEPH    |
| HERC1   |
| HERC2   |
| HERC4   |
| HERC5   |
| HERC6   |
| HERPUD1 |

|            |
|------------|
| HERPUD2    |
| HES1       |
| HES4       |
| HES6       |
| HESX1      |
| HEXA       |
| HEXB       |
| HEXDC      |
| HEXIM2     |
| HEY1       |
| HEY2       |
| HGS        |
| HHATL      |
| HHLA3      |
| HIAT1      |
| HIATL1     |
| HIATL2     |
| HIBADH     |
| HIBCH      |
| HIC2       |
| HIF1A      |
| HIF1AN     |
| HIGD1A     |
| HIGD2A     |
| HINFP      |
| HINT1      |
| HINT2      |
| HINT3      |
| HIP1       |
| HIP2       |
| HIPK2      |
| HIRIP3     |
| HISPPD2A   |
| HIST1H1A   |
| HIST1H1C   |
| HIST1H2BD  |
| HIST1H2BH  |
| HIST1H2BK  |
| HIST1H3E   |
| HIST1H3F   |
| HIST1H4C   |
| HIST1H4E   |
| HIST1H4K   |
| HIST2H2AA3 |
| HIST2H2AA4 |
| HIST2H2AC  |
| HIST2H2BE  |
| HIST2H4A   |
| HIST2H4B   |
| HIST3H2A   |

|           |
|-----------|
| HIT-40    |
| HIVEP1    |
| HIVEP2    |
| HJURP     |
| HK1       |
| HK2       |
| HKR1      |
| HLA-A     |
| HLA-A29.1 |
| HLA-B     |
| HLA-C     |
| HLA-DMA   |
| HLA-DOA   |
| HLA-DRA   |
| HLA-DRB3  |
| HLA-DRB4  |
| HLA-DRB6  |
| HLA-E     |
| HLA-F     |
| HLA-G     |
| HLA-H     |
| HLCS      |
| HLTF      |
| HLX       |
| HM13      |
| HMBOX1    |
| HMBS      |
| HMG20A    |
| HMG20B    |
| HMGA1     |
| HMGB1     |
| HMGB1L1   |
| HMGB2     |
| HMGB3     |
| HMGCL     |
| HMGCR     |
| HMGCS1    |
| HMGN1     |
| HMGN2     |
| HMGN3     |
| HMGN4     |
| HMGXB4    |
| HMHA1     |
| HMMR      |
| HMOX1     |
| HMOX2     |
| HN1       |
| HN1L      |
| HNF1B     |
| HNMT      |



|             |
|-------------|
| HNRNPA0     |
| HNRNPA1     |
| HNRNPA1L2   |
| HNRNPA2B1   |
| HNRNPA3     |
| HNRNPA3P1   |
| HNRNPAB     |
| HNRNPC      |
| HNRNPD      |
| HNRNPF      |
| HNRNPH1     |
| HNRNPH2     |
| HNRNPH3     |
| HNRNPK      |
| HNRNPL      |
| HNRNPM      |
| HNRNPR      |
| HNRNPU      |
| HNRNPUL1    |
| HNRNPUL2    |
| HNRPA1L-2   |
| HNRPA1P4    |
| HNRPA2B1    |
| HNRPC       |
| HNRPDL      |
| HNRPH1      |
| HNRPH3      |
| HNRPK       |
| HNRPLL      |
| HNRPM       |
| HNRPR       |
| HNRPUL1     |
| HNRPUL2     |
| HOMER1      |
| HOMER2      |
| HOMER3      |
| HOM-TES-103 |
| HOOK1       |
| HOOK2       |
| HOOK3       |
| HOPX        |
| HOXA6       |
| HOXB2       |
| HOXB4       |
| HOXB5       |
| HOXB6       |
| HOXB7       |
| HOXB8       |
| HOXC13      |
| HOXC6       |

|          |
|----------|
| HOXC8    |
| HPCAL1   |
| HPGD     |
| HPN      |
| HPRT1    |
| HPS1     |
| HPS3     |
| HPS4     |
| HPS5     |
| HPS6     |
| HPSE     |
| HRAS     |
| HRASLS   |
| HRASLS3  |
| HRB      |
| HRH1     |
| HRK      |
| HRSP12   |
| HS1BP3   |
| HS2ST1   |
| HS3ST1   |
| HS3ST3A1 |
| HS6ST2   |
| HSBP1    |
| HSCB     |
| HSD11B1L |
| HSD17B10 |
| HSD17B11 |
| HSD17B12 |
| HSD17B14 |
| HSD17B4  |
| HSD17B7  |
| HSD17B8  |
| HSDL1    |
| HSDL2    |
| HSF1     |
| HSF2     |
| HSGT1    |
| HSP90AA1 |
| HSP90AB1 |
| HSP90B1  |
| HSPA12A  |
| HSPA13   |
| HSPA14   |
| HSPA1A   |
| HSPA1B   |
| HSPA2    |
| HSPA4    |
| HSPA4L   |
| HSPA5    |

|         |
|---------|
| HSPA7   |
| HSPA8   |
| HSPA9   |
| HSPB1   |
| HSPB8   |
| HSPBAP1 |
| HSPBL2  |
| HSPBP1  |
| HSPC111 |
| HSPC157 |
| HSPC159 |
| HSPC171 |
| HSPC268 |
| HSPCAL3 |
| HSPD1   |
| HSPE1   |
| HSPH1   |
| HSZFP36 |
| HTATIP2 |
| HTR1E   |
| HTR2C   |
| HTRA1   |
| HTRA2   |
| HTT     |
| HUS1B   |
| HUWE1   |
| HVCN1   |
| HYAL1   |
| HYAL2   |
| HYAL3   |
| HYDIN   |
| HYI     |
| HYLS1   |
| HYOU1   |
| IAH1    |
| IARS    |
| IARS2   |
| IBTK    |
| ICA1    |
| ICAM3   |
| ICK     |
| ICMT    |
| ICOSLG  |
| ICT1    |
| ID1     |
| ID2     |
| ID2B    |
| ID3     |
| IDE     |
| IDH1    |

|         |
|---------|
| IDH2    |
| IDH3A   |
| IDH3B   |
| IDH3G   |
| IDI1    |
| IDO1    |
| IDO2    |
| IDS     |
| IDUA    |
| IER2    |
| IER3    |
| IER3IP1 |
| IER5    |
| IER5L   |
| IFFO1   |
| IFFO2   |
| IFI16   |
| IFI27   |
| IFI27L1 |
| IFI27L2 |
| IFI35   |
| IFI6    |
| IFIT1   |
| IFITM1  |
| IFITM2  |
| IFITM3  |
| IFITM4P |
| IFNAR1  |
| IFNAR2  |
| IFNGR1  |
| IFNGR2  |
| IFP38   |
| IFRD1   |
| IFRD2   |
| IFT122  |
| IFT140  |
| IFT172  |
| IFT20   |
| IFT52   |
| IFT74   |
| IFT80   |
| IFT88   |
| IGBP1   |
| IGDCC3  |
| IGDCC4  |
| IGF2AS  |
| IGF2BP1 |
| IGF2BP2 |
| IGF2BP3 |
| IGF2R   |

|         |
|---------|
| IGFBP2  |
| IGFBP3  |
| IGFBP4  |
| IGFBP5  |
| IGFBP6  |
| IGFBP7  |
| IGFL3   |
| IGHMBP2 |
| IGSF1   |
| IGSF11  |
| IGSF3   |
| IGSF5   |
| IGSF8   |
| IGSF9   |
| IHH     |
| IHPK3   |
| IK      |
| IKBIP   |
| IKBKB   |
| IKBKE   |
| IKBKG   |
| IKZF2   |
| IKZF3   |
| IKZF4   |
| IKZF5   |
| IL10    |
| IL10RB  |
| IL11    |
| IL11RA  |
| IL13RA1 |
| IL16    |
| IL17D   |
| IL17RA  |
| IL17RB  |
| IL17RC  |
| IL17RD  |
| IL18    |
| IL18BP  |
| IL1RL1  |
| IL20RB  |
| IL24    |
| IL25    |
| IL27RA  |
| IL28RA  |
| IL4R    |
| IL5RA   |
| IL8     |
| ILD1R1  |
| ILF2    |
| ILF3    |

|          |
|----------|
| ILK      |
| ILKAP    |
| ILVBL    |
| IMAA     |
| IMMP2L   |
| IMMT     |
| IMP3     |
| IMP4     |
| IMPA1    |
| IMPA2    |
| IMPACT   |
| IMPAD1   |
| IMPDH1   |
| IMPDH2   |
| INA      |
| INADL    |
| INCA1    |
| INCENP   |
| INF2     |
| ING1     |
| ING2     |
| ING3     |
| ING4     |
| INHBE    |
| INMT     |
| INO80    |
| INO80B   |
| INO80C   |
| INO80D   |
| INO80E   |
| INPP1    |
| INPP4A   |
| INPP5A   |
| INPP5B   |
| INPP5D   |
| INPP5E   |
| INPP5F   |
| INPP5K   |
| INPPL1   |
| INSC     |
| INSIG1   |
| INSIG2   |
| INS-IGF2 |
| INSL5    |
| INSM1    |
| INTS1    |
| INTS10   |
| INTS12   |
| INTS2    |
| INTS3    |

|          |
|----------|
| INTS4    |
| INTS5    |
| INTS6    |
| INTS7    |
| INTS8    |
| INTS9    |
| INTU     |
| INVS     |
| IP6K1    |
| IP6K2    |
| IP6K3    |
| IPO11    |
| IPO13    |
| IPO4     |
| IPO5     |
| IPO7     |
| IPO8     |
| IPO9     |
| IPP      |
| IPPK     |
| IPW      |
| IQCB1    |
| IQCC     |
| IQCG     |
| IQCK     |
| IQGAP1   |
| IQGAP2   |
| IQGAP3   |
| IQSEC1   |
| IQSEC2   |
| IRAK1    |
| IRAK1BP1 |
| IRAK2    |
| IRAK4    |
| IREB2    |
| IRF1     |
| IRF2BP1  |
| IRF2BP2  |
| IRF3     |
| IRF4     |
| IRF6     |
| IRF7     |
| IRF9     |
| IRS1     |
| IRS2     |
| IRX1     |
| IRX2     |
| IRX3     |
| IRX4     |
| IRX5     |

|          |
|----------|
| IRX6     |
| ISCA1    |
| ISCA1L   |
| ISCA2    |
| ISCU     |
| ISG15    |
| ISG20    |
| ISG20L1  |
| ISG20L2  |
| ISL1     |
| ISOC1    |
| ISOC2    |
| ISY1     |
| ISYNA1   |
| ITCH     |
| ITFG1    |
| ITFG2    |
| ITFG3    |
| ITGA11   |
| ITGA2    |
| ITGA3    |
| ITGA4    |
| ITGA5    |
| ITGA6    |
| ITGA9    |
| ITGAE    |
| ITGAV    |
| ITGB1    |
| ITGB1BP1 |
| ITGB1BP3 |
| ITGB2    |
| ITGB3BP  |
| ITGB4    |
| ITGB4BP  |
| ITGB5    |
| ITIH5    |
| ITLN2    |
| ITM2A    |
| ITM2B    |
| ITM2C    |
| ITPA     |
| ITPK1    |
| ITPKB    |
| ITPKC    |
| ITPR2    |
| ITPR3    |
| ITPRIP   |
| ITPRIPL2 |
| ITSN1    |
| IVD      |



|          |
|----------|
| IVNS1ABP |
| IWS1     |
| JAG1     |
| JAG2     |
| JAGN1    |
| JAK1     |
| JAK2     |
| JAM2     |
| JAM3     |
| JARID1A  |
| JARID1D  |
| JARID2   |
| JAZF1    |
| JDP2     |
| JHDM1D   |
| JMJD1A   |
| JMJD1C   |
| JMJD2B   |
| JMJD2C   |
| JMJD4    |
| JMJD5    |
| JMJD6    |
| JMJD8    |
| JMY      |
| JOSD1    |
| JOSD2    |
| JPH1     |
| JPH2     |
| JPH3     |
| JTB      |
| JUB      |
| JUN      |
| JUND     |
| JUP      |
| KAL1     |
| KANK1    |
| KANK2    |
| KANK3    |
| KANK4    |
| KARS     |
| KAT2A    |
| KAT2B    |
| KAT5     |
| KATNA1   |
| KATNAL1  |
| KATNAL2  |
| KATNB1   |
| KAZALD1  |
| KBTBD11  |
| KBTBD2   |

|          |
|----------|
| KBTBD4   |
| KBTBD6   |
| KBTBD7   |
| KBTBD8   |
| KBTBD9   |
| KCMF1    |
| KCNA5    |
| KCNAB1   |
| KCND1    |
| KCNE1L   |
| KCNF1    |
| KCNG1    |
| KCNH6    |
| KCNH8    |
| KCNJ10   |
| KCNJ13   |
| KCNJ16   |
| KCNJ2    |
| KCNJ4    |
| KCNJ8    |
| KCNK1    |
| KCNK10   |
| KCNK12   |
| KCNK13   |
| KCNK3    |
| KCNK4    |
| KCNK5    |
| KCNK6    |
| KCNMA1   |
| KCNMB2   |
| KCNMB3   |
| KCNMB4   |
| KCNN2    |
| KCNN4    |
| KCNQ10T1 |
| KCNQ2    |
| KCNS1    |
| KCNS3    |
| KCNT2    |
| KCTD1    |
| KCTD10   |
| KCTD11   |
| KCTD12   |
| KCTD13   |
| KCTD14   |
| KCTD15   |
| KCTD17   |
| KCTD2    |
| KCTD20   |
| KCTD21   |

|           |
|-----------|
| KCTD3     |
| KCTD5     |
| KCTD6     |
| KCTD7     |
| KCTD9     |
| KDELC1    |
| KDELC2    |
| KDELR1    |
| KDELR2    |
| KDELR3    |
| KDM3B     |
| KDM4D     |
| KDM5B     |
| KDM6B     |
| KDR       |
| KDSR      |
| KEAP1     |
| KEL       |
| KHDC1     |
| KHDRBS1   |
| KHDRBS3   |
| KHNYN     |
| KHSRP     |
| KIAA0020  |
| KIAA0040  |
| KIAA0082  |
| KIAA0090  |
| KIAA0100  |
| KIAA0101  |
| KIAA0114  |
| KIAA0133  |
| KIAA0141  |
| KIAA0146  |
| KIAA0174  |
| KIAA0182  |
| KIAA0194  |
| KIAA0195  |
| KIAA0196  |
| KIAA0232  |
| KIAA0240  |
| KIAA0247  |
| KIAA0261  |
| KIAA0319L |
| KIAA0355  |
| KIAA0363  |
| KIAA0367  |
| KIAA0368  |
| KIAA0391  |
| KIAA0406  |
| KIAA0408  |

|           |
|-----------|
| KIAA0415  |
| KIAA0427  |
| KIAA0430  |
| KIAA0460  |
| KIAA0492  |
| KIAA0494  |
| KIAA0495  |
| KIAA0513  |
| KIAA0514  |
| KIAA0528  |
| KIAA0556  |
| KIAA0562  |
| KIAA0564  |
| KIAA0586  |
| KIAA0649  |
| KIAA0652  |
| KIAA0664  |
| KIAA0672  |
| KIAA0753  |
| KIAA0773  |
| KIAA0831  |
| KIAA0892  |
| KIAA0895  |
| KIAA0895L |
| KIAA0907  |
| KIAA0913  |
| KIAA0922  |
| KIAA0947  |
| KIAA1009  |
| KIAA1012  |
| KIAA1026  |
| KIAA1033  |
| KIAA1107  |
| KIAA1128  |
| KIAA1143  |
| KIAA1147  |
| KIAA1160  |
| KIAA1161  |
| KIAA1191  |
| KIAA1211  |
| KIAA1217  |
| KIAA1244  |
| KIAA1267  |
| KIAA1274  |
| KIAA1279  |
| KIAA1285  |
| KIAA1310  |
| KIAA1324L |
| KIAA1328  |
| KIAA1333  |

|           |
|-----------|
| KIAA1370  |
| KIAA1383  |
| KIAA1429  |
| KIAA1430  |
| KIAA1467  |
| KIAA1468  |
| KIAA1522  |
| KIAA1524  |
| KIAA1530  |
| KIAA1539  |
| KIAA1543  |
| KIAA1545  |
| KIAA1549  |
| KIAA1571  |
| KIAA1586  |
| KIAA1598  |
| KIAA1600  |
| KIAA1602  |
| KIAA1618  |
| KIAA1632  |
| KIAA1641  |
| KIAA1666  |
| KIAA1671  |
| KIAA1688  |
| KIAA1704  |
| KIAA1712  |
| KIAA1715  |
| KIAA1731  |
| KIAA1737  |
| KIAA1751  |
| KIAA1797  |
| KIAA1826  |
| KIAA1862  |
| KIAA1949  |
| KIAA1958  |
| KIAA1967  |
| KIAA1984  |
| KIAA2010  |
| KIAA2013  |
| KIAA2026  |
| KIDINS220 |
| KIF11     |
| KIF13B    |
| KIF14     |
| KIF15     |
| KIF16B    |
| KIF18A    |
| KIF1A     |
| KIF1B     |
| KIF1C     |

|         |
|---------|
| KIF20A  |
| KIF20B  |
| KIF21A  |
| KIF22   |
| KIF23   |
| KIF24   |
| KIF26A  |
| KIF26B  |
| KIF2A   |
| KIF2C   |
| KIF3B   |
| KIF3C   |
| KIF4A   |
| KIF5B   |
| KIF5C   |
| KIF7    |
| KIFAP3  |
| KIFC1   |
| KIFC2   |
| KIT     |
| KITLG   |
| KLB     |
| KLC1    |
| KLC2    |
| KLC4    |
| KLF11   |
| KLF12   |
| KLF13   |
| KLF15   |
| KLF2    |
| KLF4    |
| KLF5    |
| KLF6    |
| KLF8    |
| KLF9    |
| KLHDC2  |
| KLHDC3  |
| KLHDC4  |
| KLHDC5  |
| KLHDC8B |
| KLHDC9  |
| KLHL12  |
| KLHL13  |
| KLHL17  |
| KLHL18  |
| KLHL2   |
| KLHL20  |
| KLHL21  |
| KLHL22  |
| KLHL23  |

|            |
|------------|
| KLHL24     |
| KLHL26     |
| KLHL28     |
| KLHL29     |
| KLHL3      |
| KLHL36     |
| KLHL5      |
| KLHL7      |
| KLHL8      |
| KLHL9      |
| KLK6       |
| KLRA1      |
| KLRAQ1     |
| KLRG1      |
| KLRG2      |
| KNTC1      |
| KPNA1      |
| KPNA2      |
| KPNA3      |
| KPNA4      |
| KPNA6      |
| KPNB1      |
| KPTN       |
| KRAS       |
| KRBA1      |
| KRCC1      |
| KREMEN1    |
| KREMEN2    |
| KRI1       |
| KRIT1      |
| KRT10      |
| KRT17P3    |
| KRT18      |
| KRT18P13   |
| KRT18P17   |
| KRT18P19   |
| KRT18P26   |
| KRT18P28   |
| KRT18P30   |
| KRT18P42   |
| KRT19      |
| KRT8       |
| KRT8P9     |
| KRTAP10-11 |
| KRTAP10-2  |
| KRTAP21-1  |
| KRTAP6-3   |
| KRTCAP2    |
| KRTCAP3    |
| KRTDAP     |

|          |
|----------|
| KSR2     |
| KTELC1   |
| KT112    |
| KTN1     |
| L1CAM    |
| L1TD1    |
| L2HGDH   |
| L3MBTL   |
| L3MBTL2  |
| L3MBTL3  |
| LACTB    |
| LACTB2   |
| LAD1     |
| LAGE3    |
| LAIR1    |
| LAMA1    |
| LAMA2    |
| LAMA5    |
| LAMB1    |
| LAMB2    |
| LAMB2L   |
| LAMC1    |
| LAMC2    |
| LAMC3    |
| LAMP1    |
| LAMP2    |
| LAMP3    |
| LANCL1   |
| LANCL2   |
| LAP3     |
| LPTM4A   |
| LPTM4B   |
| LARGE    |
| LARP1    |
| LARP1B   |
| LARP4    |
| LARP4B   |
| LARP6    |
| LARP7    |
| LARS     |
| LARS2    |
| LAS1L    |
| LASP1    |
| LASS1    |
| LASS2    |
| LASS4    |
| LASS5    |
| LASS6    |
| LAT1-3TM |
| LATS2    |



|          |
|----------|
| LAYN     |
| LBA1     |
| LBH      |
| LBR      |
| LBX2     |
| LCLAT1   |
| LCMT1    |
| LCMT2    |
| LCN15    |
| LCN1L1   |
| LCOR     |
| LCP1     |
| LDB2     |
| LDHA     |
| LDHB     |
| LDLR     |
| LDLRAD3  |
| LDLRAP1  |
| LDOC1    |
| LDOC1L   |
| LEAP2    |
| LECT1    |
| LEF1     |
| LEFTY2   |
| LEMD1    |
| LEMD2    |
| LEMD3    |
| LENG1    |
| LEO1     |
| LEP      |
| LEPR     |
| LEPRE1   |
| LEPREL1  |
| LEPREL2  |
| LEPROT   |
| LEPROTL1 |
| LETM1    |
| LETMD1   |
| LFNG     |
| LGALS1   |
| LGALS2   |
| LGALS3   |
| LGALS3BP |
| LGALS8   |
| LGI2     |
| LGMN     |
| LGR6     |
| LGTN     |
| LHFP     |
| LHFPL2   |

|        |
|--------|
| LHPP   |
| LIAS   |
| LIFR   |
| LIG1   |
| LIG3   |
| LILRB1 |
| LILRB3 |
| LIMA1  |
| LIMCH1 |
| LIME1  |
| LIMK1  |
| LIMK2  |
| LIMS1  |
| LIMS2  |
| LIN28  |
| LIN28B |
| LIN37  |
| LIN52  |
| LIN54  |
| LIN7A  |
| LIN7B  |
| LIN7C  |
| LIN9   |
| LINGO1 |
| LINGO2 |
| LINS1  |
| LIPA   |
| LIPG   |
| LIPT1  |
| LITAF  |
| LIX1   |
| LIX1L  |
| LLGL1  |
| LLGL2  |
| LLPH   |
| LMAN1  |
| LMAN2  |
| LMAN2L |
| LMBR1  |
| LMBRD1 |
| LMCD1  |
| LMF2   |
| LMNA   |
| LMNB1  |
| LMNB2  |
| LMO2   |
| LMO4   |
| LMOD3  |
| LMTK2  |
| LMTK3  |

|             |
|-------------|
| LNPEP       |
| LN2         |
| LOC10000858 |
| LOC10000858 |
| LOC10000967 |
| LOC10012555 |
| LOC10012789 |
| LOC10012789 |
| LOC10012791 |
| LOC10012791 |
| LOC10012792 |
| LOC10012797 |
| LOC10012797 |
| LOC10012798 |
| LOC10012798 |
| LOC10012799 |
| LOC10012799 |
| LOC10012800 |
| LOC10012801 |
| LOC10012805 |
| LOC10012806 |
| LOC10012806 |
| LOC10012808 |
| LOC10012808 |
| LOC10012809 |
| LOC10012811 |
| LOC10012812 |
| LOC10012813 |
| LOC10012816 |
| LOC10012816 |
| LOC10012819 |
| LOC10012819 |
| LOC10012822 |
| LOC10012823 |
| LOC10012825 |
| LOC10012826 |
| LOC10012826 |
| LOC10012826 |
| LOC10012827 |
| LOC10012828 |
| LOC10012829 |
| LOC10012830 |
| LOC10012832 |
| LOC10012833 |
| LOC10012835 |
| LOC10012839 |
| LOC10012839 |
| LOC10012841 |
| LOC10012842 |
| LOC10012842 |

|             |
|-------------|
| LOC10012844 |
| LOC10012846 |
| LOC10012846 |
| LOC10012848 |
| LOC10012849 |
| LOC10012850 |
| LOC10012850 |
| LOC10012851 |
| LOC10012852 |
| LOC10012854 |
| LOC10012858 |
| LOC10012862 |
| LOC10012867 |
| LOC10012868 |
| LOC10012868 |
| LOC10012869 |
| LOC10012873 |
| LOC10012873 |
| LOC10012876 |
| LOC10012877 |
| LOC10012877 |
| LOC10012880 |
| LOC10012883 |
| LOC10012888 |
| LOC10012888 |
| LOC10012889 |
| LOC10012889 |
| LOC10012891 |
| LOC10012893 |
| LOC10012897 |
| LOC10012897 |
| LOC10012899 |
| LOC10012902 |
| LOC10012902 |
| LOC10012902 |
| LOC10012903 |
| LOC10012905 |
| LOC10012906 |
| LOC10012908 |
| LOC10012909 |
| LOC10012909 |
| LOC10012911 |
| LOC10012913 |
| LOC10012914 |
| LOC10012914 |
| LOC10012914 |
| LOC10012914 |
| LOC10012915 |
| LOC10012919 |
| LOC10012920 |

|             |
|-------------|
| LOC10012920 |
| LOC10012921 |
| LOC10012923 |
| LOC10012924 |
| LOC10012926 |
| LOC10012926 |
| LOC10012929 |
| LOC10012929 |
| LOC10012933 |
| LOC10012934 |
| LOC10012936 |
| LOC10012936 |
| LOC10012937 |
| LOC10012942 |
| LOC10012942 |
| LOC10012944 |
| LOC10012947 |
| LOC10012950 |
| LOC10012951 |
| LOC10012952 |
| LOC10012953 |
| LOC10012953 |
| LOC10012954 |
| LOC10012954 |
| LOC10012955 |
| LOC10012955 |
| LOC10012955 |
| LOC10012956 |
| LOC10012958 |
| LOC10012958 |
| LOC10012959 |
| LOC10012960 |
| LOC10012963 |
| LOC10012963 |
| LOC10012964 |
| LOC10012965 |
| LOC10012965 |
| LOC10012966 |
| LOC10012967 |
| LOC10012968 |
| LOC10012968 |
| LOC10012970 |
| LOC10012971 |
| LOC10012974 |
| LOC10012974 |
| LOC10012975 |
| LOC10012975 |
| LOC10012978 |
| LOC10012980 |
| LOC10012982 |

|             |
|-------------|
| LOC10012986 |
| LOC10012988 |
| LOC10012989 |
| LOC10012990 |
| LOC10012990 |
| LOC10012990 |
| LOC10012990 |
| LOC10012993 |
| LOC10012995 |
| LOC10012995 |
| LOC10012997 |
| LOC10012997 |
| LOC10012997 |
| LOC10012998 |
| LOC10013000 |
| LOC10013000 |
| LOC10013005 |
| LOC10013007 |
| LOC10013007 |
| LOC10013009 |
| LOC10013012 |
| LOC10013013 |
| LOC10013013 |
| LOC10013013 |
| LOC10013015 |
| LOC10013016 |
| LOC10013017 |
| LOC10013017 |
| LOC10013019 |
| LOC10013022 |
| LOC10013022 |
| LOC10013023 |
| LOC10013026 |
| LOC10013027 |
| LOC10013028 |
| LOC10013029 |
| LOC10013029 |
| LOC10013030 |
| LOC10013033 |
| LOC10013035 |
| LOC10013036 |
| LOC10013038 |
| LOC10013044 |
| LOC10013044 |
| LOC10013045 |
| LOC10013047 |
| LOC10013050 |
| LOC10013051 |
| LOC10013051 |
| LOC10013051 |

|             |
|-------------|
| LOC10013055 |
| LOC10013055 |
| LOC10013055 |
| LOC10013055 |
| LOC10013056 |
| LOC10013056 |
| LOC10013059 |
| LOC10013060 |
| LOC10013062 |
| LOC10013062 |
| LOC10013063 |
| LOC10013070 |
| LOC10013070 |
| LOC10013071 |
| LOC10013074 |
| LOC10013075 |
| LOC10013076 |
| LOC10013077 |
| LOC10013077 |
| LOC10013080 |
| LOC10013081 |
| LOC10013083 |
| LOC10013083 |
| LOC10013085 |
| LOC10013088 |
| LOC10013089 |
| LOC10013090 |
| LOC10013090 |
| LOC10013091 |
| LOC10013091 |
| LOC10013093 |
| LOC10013093 |
| LOC10013098 |
| LOC10013100 |
| LOC10013107 |
| LOC10013109 |
| LOC10013113 |
| LOC10013113 |
| LOC10013116 |
| LOC10013116 |
| LOC10013118 |
| LOC10013119 |
| LOC10013120 |
| LOC10013124 |
| LOC10013126 |
| LOC10013126 |
| LOC10013129 |
| LOC10013130 |
| LOC10013132 |
| LOC10013133 |

|             |
|-------------|
| LOC10013134 |
| LOC10013138 |
| LOC10013138 |
| LOC10013140 |
| LOC10013145 |
| LOC10013146 |
| LOC10013151 |
| LOC10013152 |
| LOC10013153 |
| LOC10013153 |
| LOC10013154 |
| LOC10013157 |
| LOC10013160 |
| LOC10013160 |
| LOC10013162 |
| LOC10013164 |
| LOC10013167 |
| LOC10013167 |
| LOC10013171 |
| LOC10013171 |
| LOC10013172 |
| LOC10013173 |
| LOC10013173 |
| LOC10013174 |
| LOC10013176 |
| LOC10013178 |
| LOC10013178 |
| LOC10013178 |
| LOC10013178 |
| LOC10013180 |
| LOC10013181 |
| LOC10013183 |
| LOC10013185 |
| LOC10013185 |
| LOC10013186 |
| LOC10013190 |
| LOC10013194 |
| LOC10013196 |
| LOC10013197 |
| LOC10013197 |
| LOC10013197 |
| LOC10013198 |
| LOC10013198 |
| LOC10013201 |
| LOC10013203 |
| LOC10013203 |
| LOC10013208 |
| LOC10013210 |
| LOC10013211 |
| LOC10013211 |
| LOC10013213 |



LOC10013219  
LOC10013221  
LOC10013222  
LOC10013224  
LOC10013229  
LOC10013229  
LOC10013230  
LOC10013232  
LOC10013232  
LOC10013234  
LOC10013235  
LOC10013236  
LOC10013239  
LOC10013239  
LOC10013241  
LOC10013241  
LOC10013242  
LOC10013242  
LOC10013243  
LOC10013244  
LOC10013245  
LOC10013245  
LOC10013247  
LOC10013248  
LOC10013248  
LOC10013249  
LOC10013249  
LOC10013249  
LOC10013249  
LOC10013250  
LOC10013251  
LOC10013251  
LOC10013251  
LOC10013252  
LOC10013253  
LOC10013254  
LOC10013254  
LOC10013254  
LOC10013256  
LOC10013258  
LOC10013259  
LOC10013265  
LOC10013265  
LOC10013265  
LOC10013267  
LOC10013267  
LOC10013270  
LOC10013271  
LOC10013271  
LOC10013272  
LOC10013272

LOC10013272  
LOC10013274  
LOC10013274  
LOC10013276  
LOC10013276  
LOC10013277  
LOC10013278  
LOC10013279  
LOC10013279  
LOC10013279  
LOC10013280  
LOC10013280  
LOC10013282  
LOC10013286  
LOC10013289  
LOC10013290  
LOC10013291  
LOC10013292  
LOC10013299  
LOC10013300  
LOC10013301  
LOC10013301  
LOC10013301  
LOC10013304  
LOC10013305  
LOC10013307  
LOC10013307  
LOC10013309  
LOC10013312  
LOC10013314  
LOC10013316  
LOC10013317  
LOC10013318  
LOC10013320  
LOC10013321  
LOC10013322  
LOC10013322  
LOC10013323  
LOC10013323  
LOC10013323  
LOC10013326  
LOC10013327  
LOC10013327  
LOC10013329  
LOC10013332  
LOC10013332  
LOC10013332  
LOC10013337  
LOC10013339  
LOC10013343  
LOC10013343

|             |
|-------------|
| LOC10013345 |
| LOC10013346 |
| LOC10013347 |
| LOC10013347 |
| LOC10013348 |
| LOC10013348 |
| LOC10013350 |
| LOC10013351 |
| LOC10013351 |
| LOC10013356 |
| LOC10013357 |
| LOC10013358 |
| LOC10013360 |
| LOC10013360 |
| LOC10013360 |
| LOC10013364 |
| LOC10013366 |
| LOC10013366 |
| LOC10013366 |
| LOC10013367 |
| LOC10013368 |
| LOC10013369 |
| LOC10013369 |
| LOC10013373 |
| LOC10013374 |
| LOC10013375 |
| LOC10013377 |
| LOC10013377 |
| LOC10013379 |
| LOC10013380 |
| LOC10013380 |
| LOC10013381 |
| LOC10013382 |
| LOC10013383 |
| LOC10013385 |
| LOC10013387 |
| LOC10013388 |
| LOC10013391 |
| LOC10013392 |
| LOC10013393 |
| LOC10013393 |
| LOC10013395 |
| LOC10013398 |
| LOC10013399 |
| LOC10013400 |
| LOC10013401 |
| LOC10013401 |
| LOC10013405 |
| LOC10013407 |
| LOC10013408 |
| LOC10013409 |

|             |
|-------------|
| LOC10013410 |
| LOC10013410 |
| LOC10013412 |
| LOC10013413 |
| LOC10013414 |
| LOC10013415 |
| LOC10013418 |
| LOC10013418 |
| LOC10013418 |
| LOC10013420 |
| LOC10013424 |
| LOC10013426 |
| LOC10013427 |
| LOC10013429 |
| LOC10013430 |
| LOC10013430 |
| LOC10013430 |
| LOC10013436 |
| LOC10013436 |
| LOC10013439 |
| LOC10013440 |
| LOC10013442 |
| LOC10013444 |
| LOC10013446 |
| LOC10013446 |
| LOC10013447 |
| LOC10013450 |
| LOC10013452 |
| LOC10013453 |
| LOC10013453 |
| LOC10013454 |
| LOC10013456 |
| LOC10013458 |
| LOC10013463 |
| LOC10013464 |
| LOC10013468 |
| LOC10013471 |
| LOC10013473 |
| LOC10013479 |
| LOC10013481 |
| LOC10013486 |
| LOC10019093 |
| LOC10019093 |
| LOC10019098 |
| LOC113386   |
| LOC119358   |
| LOC123688   |
| LOC124512   |
| LOC126235   |
| LOC127295   |

|           |
|-----------|
| LOC128192 |
| LOC130773 |
| LOC131691 |
| LOC132241 |
| LOC133993 |
| LOC134505 |
| LOC134997 |
| LOC136143 |
| LOC137107 |
| LOC143543 |
| LOC143666 |
| LOC144438 |
| LOC144481 |
| LOC145853 |
| LOC146053 |
| LOC146177 |
| LOC146439 |
| LOC146517 |
| LOC147645 |
| LOC147727 |
| LOC147804 |
| LOC148413 |
| LOC148430 |
| LOC148709 |
| LOC148915 |
| LOC149134 |
| LOC149224 |
| LOC149448 |
| LOC149501 |
| LOC150051 |
| LOC150568 |
| LOC151162 |
| LOC151300 |
| LOC151457 |
| LOC151579 |
| LOC152195 |
| LOC152217 |
| LOC153561 |
| LOC154860 |
| LOC158160 |
| LOC158301 |
| LOC158345 |
| LOC161527 |
| LOC163233 |
| LOC168474 |
| LOC169834 |
| LOC196752 |
| LOC199800 |
| LOC200030 |
| LOC201229 |

|           |
|-----------|
| LOC201725 |
| LOC202051 |
| LOC202134 |
| LOC202227 |
| LOC202781 |
| LOC203547 |
| LOC205251 |
| LOC220433 |
| LOC220686 |
| LOC221442 |
| LOC221710 |
| LOC23117  |
| LOC253039 |
| LOC255167 |
| LOC255783 |
| LOC257396 |
| LOC25845  |
| LOC283267 |
| LOC283412 |
| LOC283481 |
| LOC283755 |
| LOC283788 |
| LOC283932 |
| LOC283953 |
| LOC283999 |
| LOC284023 |
| LOC284167 |
| LOC284230 |
| LOC284371 |
| LOC284393 |
| LOC284620 |
| LOC284821 |
| LOC284988 |
| LOC285053 |
| LOC285074 |
| LOC285176 |
| LOC285359 |
| LOC285500 |
| LOC285550 |
| LOC285741 |
| LOC285900 |
| LOC285908 |
| LOC285943 |
| LOC286016 |
| LOC286157 |
| LOC286208 |
| LOC286367 |
| LOC286444 |
| LOC286467 |
| LOC286512 |

|           |
|-----------|
| LOC338758 |
| LOC338799 |
| LOC338870 |
| LOC339290 |
| LOC339352 |
| LOC339483 |
| LOC339535 |
| LOC339778 |
| LOC339804 |
| LOC339843 |
| LOC339970 |
| LOC340260 |
| LOC340357 |
| LOC340598 |
| LOC341230 |
| LOC341315 |
| LOC341457 |
| LOC341784 |
| LOC341965 |
| LOC342994 |
| LOC343184 |
| LOC344595 |
| LOC344741 |
| LOC345041 |
| LOC345645 |
| LOC346085 |
| LOC346887 |
| LOC346950 |
| LOC347292 |
| LOC347376 |
| LOC347544 |
| LOC374395 |
| LOC387683 |
| LOC387703 |
| LOC387753 |
| LOC387763 |
| LOC387791 |
| LOC387820 |
| LOC387825 |
| LOC387841 |
| LOC387867 |
| LOC387882 |
| LOC387930 |
| LOC387934 |
| LOC388076 |
| LOC388122 |
| LOC388275 |
| LOC388312 |
| LOC388339 |
| LOC388344 |

|           |
|-----------|
| LOC388397 |
| LOC388401 |
| LOC388474 |
| LOC388494 |
| LOC388524 |
| LOC388532 |
| LOC388556 |
| LOC388564 |
| LOC388588 |
| LOC388621 |
| LOC388654 |
| LOC388692 |
| LOC388707 |
| LOC388720 |
| LOC388789 |
| LOC388796 |
| LOC388820 |
| LOC388907 |
| LOC388955 |
| LOC388969 |
| LOC389049 |
| LOC389101 |
| LOC389137 |
| LOC389141 |
| LOC389156 |
| LOC389168 |
| LOC389203 |
| LOC389223 |
| LOC389286 |
| LOC389293 |
| LOC389322 |
| LOC389342 |
| LOC389386 |
| LOC389404 |
| LOC389435 |
| LOC389465 |
| LOC389517 |
| LOC389599 |
| LOC389662 |
| LOC389672 |
| LOC389765 |
| LOC389787 |
| LOC389816 |
| LOC389873 |
| LOC389901 |
| LOC390183 |
| LOC390298 |
| LOC390345 |
| LOC390354 |
| LOC390414 |



|           |
|-----------|
| LOC390466 |
| LOC390530 |
| LOC390557 |
| LOC390578 |
| LOC390660 |
| LOC390671 |
| LOC390705 |
| LOC390735 |
| LOC390876 |
| LOC390956 |
| LOC391019 |
| LOC391044 |
| LOC391045 |
| LOC391075 |
| LOC391126 |
| LOC391132 |
| LOC391169 |
| LOC391334 |
| LOC391370 |
| LOC391532 |
| LOC391578 |
| LOC391655 |
| LOC391656 |
| LOC391670 |
| LOC391692 |
| LOC391769 |
| LOC391777 |
| LOC391811 |
| LOC391825 |
| LOC391833 |
| LOC392008 |
| LOC392285 |
| LOC392301 |
| LOC392437 |
| LOC392501 |
| LOC392522 |
| LOC392635 |
| LOC392787 |
| LOC392871 |
| LOC399491 |
| LOC399744 |
| LOC399748 |
| LOC399804 |
| LOC399829 |
| LOC399881 |
| LOC399900 |
| LOC399942 |
| LOC399965 |
| LOC399988 |
| LOC400013 |

|           |
|-----------|
| LOC400027 |
| LOC400061 |
| LOC400214 |
| LOC400304 |
| LOC400389 |
| LOC400446 |
| LOC400455 |
| LOC400464 |
| LOC400506 |
| LOC400578 |
| LOC400652 |
| LOC400657 |
| LOC400713 |
| LOC400721 |
| LOC400750 |
| LOC400836 |
| LOC400879 |
| LOC400890 |
| LOC400948 |
| LOC400963 |
| LOC401002 |
| LOC401010 |
| LOC401019 |
| LOC401074 |
| LOC401076 |
| LOC401098 |
| LOC401115 |
| LOC401127 |
| LOC401152 |
| LOC401206 |
| LOC401218 |
| LOC401237 |
| LOC401238 |
| LOC401321 |
| LOC401357 |
| LOC401397 |
| LOC401433 |
| LOC401533 |
| LOC401537 |
| LOC401561 |
| LOC401620 |
| LOC401640 |
| LOC401648 |
| LOC401650 |
| LOC401676 |
| LOC401677 |
| LOC401717 |
| LOC401720 |
| LOC401817 |
| LOC401847 |

|           |
|-----------|
| LOC402057 |
| LOC402112 |
| LOC402175 |
| LOC402221 |
| LOC402251 |
| LOC402342 |
| LOC402509 |
| LOC402562 |
| LOC402644 |
| LOC402677 |
| LOC402694 |
| LOC404266 |
| LOC407835 |
| LOC439949 |
| LOC439950 |
| LOC439953 |
| LOC439992 |
| LOC439994 |
| LOC440027 |
| LOC440043 |
| LOC440055 |
| LOC440063 |
| LOC440093 |
| LOC440132 |
| LOC440145 |
| LOC440157 |
| LOC440160 |
| LOC440258 |
| LOC440280 |
| LOC440311 |
| LOC440341 |
| LOC440345 |
| LOC440348 |
| LOC440349 |
| LOC440353 |
| LOC440354 |
| LOC440359 |
| LOC440366 |
| LOC440389 |
| LOC440396 |
| LOC440459 |
| LOC440487 |
| LOC440498 |
| LOC440509 |
| LOC440563 |
| LOC440575 |
| LOC440585 |
| LOC440589 |
| LOC440595 |
| LOC440704 |

|           |
|-----------|
| LOC440731 |
| LOC440733 |
| LOC440737 |
| LOC440748 |
| LOC440776 |
| LOC440864 |
| LOC440895 |
| LOC440905 |
| LOC440910 |
| LOC440926 |
| LOC440927 |
| LOC440928 |
| LOC440957 |
| LOC440991 |
| LOC441009 |
| LOC441013 |
| LOC441019 |
| LOC441034 |
| LOC441046 |
| LOC441050 |
| LOC441061 |
| LOC441066 |
| LOC441073 |
| LOC441087 |
| LOC441089 |
| LOC441114 |
| LOC441131 |
| LOC441150 |
| LOC441154 |
| LOC441155 |
| LOC441191 |
| LOC441237 |
| LOC441241 |
| LOC441246 |
| LOC441253 |
| LOC441268 |
| LOC441294 |
| LOC441377 |
| LOC441408 |
| LOC441426 |
| LOC441442 |
| LOC441453 |
| LOC441454 |
| LOC441455 |
| LOC441461 |
| LOC441481 |
| LOC441484 |
| LOC441506 |
| LOC441528 |
| LOC441550 |

|           |
|-----------|
| LOC441642 |
| LOC441743 |
| LOC441763 |
| LOC441775 |
| LOC441876 |
| LOC441896 |
| LOC441907 |
| LOC442057 |
| LOC442075 |
| LOC442153 |
| LOC442162 |
| LOC442180 |
| LOC442181 |
| LOC442232 |
| LOC442270 |
| LOC442442 |
| LOC442454 |
| LOC442582 |
| LOC442597 |
| LOC442727 |
| LOC493869 |
| LOC550112 |
| LOC550643 |
| LOC552889 |
| LOC554203 |
| LOC554206 |
| LOC572558 |
| LOC613037 |
| LOC641298 |
| LOC641367 |
| LOC641710 |
| LOC641727 |
| LOC641746 |
| LOC641750 |
| LOC641765 |
| LOC641768 |
| LOC641798 |
| LOC641802 |
| LOC641814 |
| LOC641820 |
| LOC641844 |
| LOC641848 |
| LOC641849 |
| LOC641972 |
| LOC641978 |
| LOC641992 |
| LOC641996 |
| LOC642017 |
| LOC642031 |
| LOC642033 |

|           |
|-----------|
| LOC642076 |
| LOC642082 |
| LOC642156 |
| LOC642197 |
| LOC642210 |
| LOC642236 |
| LOC642250 |
| LOC642255 |
| LOC642299 |
| LOC642333 |
| LOC642357 |
| LOC642361 |
| LOC642367 |
| LOC642393 |
| LOC642412 |
| LOC642443 |
| LOC642446 |
| LOC642449 |
| LOC642458 |
| LOC642468 |
| LOC642469 |
| LOC642489 |
| LOC642502 |
| LOC642513 |
| LOC642559 |
| LOC642567 |
| LOC642570 |
| LOC642585 |
| LOC642590 |
| LOC642636 |
| LOC642661 |
| LOC642678 |
| LOC642691 |
| LOC642726 |
| LOC642738 |
| LOC642741 |
| LOC642755 |
| LOC642771 |
| LOC642780 |
| LOC642784 |
| LOC642815 |
| LOC642817 |
| LOC642828 |
| LOC642852 |
| LOC642859 |
| LOC642892 |
| LOC642897 |
| LOC642909 |
| LOC642921 |
| LOC642934 |

|           |
|-----------|
| LOC642946 |
| LOC642947 |
| LOC642956 |
| LOC642975 |
| LOC642980 |
| LOC642981 |
| LOC642989 |
| LOC643007 |
| LOC643011 |
| LOC643015 |
| LOC643031 |
| LOC643035 |
| LOC643123 |
| LOC643159 |
| LOC643167 |
| LOC643176 |
| LOC643206 |
| LOC643220 |
| LOC643224 |
| LOC643233 |
| LOC643272 |
| LOC643284 |
| LOC643287 |
| LOC643293 |
| LOC643300 |
| LOC643308 |
| LOC643310 |
| LOC643313 |
| LOC643319 |
| LOC643336 |
| LOC643342 |
| LOC643357 |
| LOC643358 |
| LOC643384 |
| LOC643387 |
| LOC643401 |
| LOC643423 |
| LOC643431 |
| LOC643433 |
| LOC643438 |
| LOC643446 |
| LOC643451 |
| LOC643452 |
| LOC643507 |
| LOC643509 |
| LOC643531 |
| LOC643534 |
| LOC643624 |
| LOC643664 |
| LOC643665 |

|           |
|-----------|
| LOC643668 |
| LOC643778 |
| LOC643779 |
| LOC643790 |
| LOC643802 |
| LOC643856 |
| LOC643863 |
| LOC643870 |
| LOC643872 |
| LOC643873 |
| LOC643882 |
| LOC643894 |
| LOC643905 |
| LOC643918 |
| LOC643949 |
| LOC643960 |
| LOC643995 |
| LOC643997 |
| LOC644029 |
| LOC644033 |
| LOC644037 |
| LOC644039 |
| LOC644063 |
| LOC644075 |
| LOC644094 |
| LOC644101 |
| LOC644124 |
| LOC644128 |
| LOC644131 |
| LOC644132 |
| LOC644144 |
| LOC644150 |
| LOC644162 |
| LOC644172 |
| LOC644191 |
| LOC644214 |
| LOC644237 |
| LOC644250 |
| LOC644254 |
| LOC644256 |
| LOC644265 |
| LOC644276 |
| LOC644310 |
| LOC644315 |
| LOC644330 |
| LOC644338 |
| LOC644353 |
| LOC644360 |
| LOC644363 |
| LOC644380 |



|           |
|-----------|
| LOC644404 |
| LOC644422 |
| LOC644423 |
| LOC644464 |
| LOC644482 |
| LOC644511 |
| LOC644517 |
| LOC644563 |
| LOC644590 |
| LOC644591 |
| LOC644604 |
| LOC644615 |
| LOC644617 |
| LOC644619 |
| LOC644629 |
| LOC644634 |
| LOC644642 |
| LOC644670 |
| LOC644684 |
| LOC644739 |
| LOC644743 |
| LOC644745 |
| LOC644760 |
| LOC644761 |
| LOC644762 |
| LOC644774 |
| LOC644790 |
| LOC644799 |
| LOC644809 |
| LOC644816 |
| LOC644852 |
| LOC644860 |
| LOC644863 |
| LOC644869 |
| LOC644877 |
| LOC644879 |
| LOC644889 |
| LOC644907 |
| LOC644914 |
| LOC644919 |
| LOC644928 |
| LOC644931 |
| LOC644934 |
| LOC644935 |
| LOC644936 |
| LOC644937 |
| LOC644949 |
| LOC644950 |
| LOC644979 |
| LOC644988 |

|           |
|-----------|
| LOC645001 |
| LOC645015 |
| LOC645018 |
| LOC645058 |
| LOC645086 |
| LOC645094 |
| LOC645100 |
| LOC645138 |
| LOC645157 |
| LOC645166 |
| LOC645173 |
| LOC645174 |
| LOC645175 |
| LOC645176 |
| LOC645231 |
| LOC645233 |
| LOC645236 |
| LOC645251 |
| LOC645289 |
| LOC645296 |
| LOC645304 |
| LOC645317 |
| LOC645321 |
| LOC645332 |
| LOC645351 |
| LOC645362 |
| LOC645378 |
| LOC645381 |
| LOC645385 |
| LOC645387 |
| LOC645430 |
| LOC645431 |
| LOC645436 |
| LOC645452 |
| LOC645466 |
| LOC645489 |
| LOC645515 |
| LOC645550 |
| LOC645558 |
| LOC645566 |
| LOC645586 |
| LOC645605 |
| LOC645609 |
| LOC645630 |
| LOC645683 |
| LOC645688 |
| LOC645691 |
| LOC645693 |
| LOC645715 |
| LOC645726 |

|           |
|-----------|
| LOC645737 |
| LOC645762 |
| LOC645863 |
| LOC645895 |
| LOC645899 |
| LOC645904 |
| LOC645937 |
| LOC645968 |
| LOC645978 |
| LOC645979 |
| LOC646034 |
| LOC646043 |
| LOC646044 |
| LOC646067 |
| LOC646093 |
| LOC646100 |
| LOC646103 |
| LOC646123 |
| LOC646135 |
| LOC646144 |
| LOC646195 |
| LOC646197 |
| LOC646200 |
| LOC646214 |
| LOC646278 |
| LOC646294 |
| LOC646301 |
| LOC646316 |
| LOC646332 |
| LOC646347 |
| LOC646348 |
| LOC646350 |
| LOC646446 |
| LOC646463 |
| LOC646476 |
| LOC646483 |
| LOC646508 |
| LOC646527 |
| LOC646531 |
| LOC646547 |
| LOC646548 |
| LOC646567 |
| LOC646609 |
| LOC646630 |
| LOC646672 |
| LOC646674 |
| LOC646688 |
| LOC646723 |
| LOC646750 |
| LOC646753 |

|           |
|-----------|
| LOC646766 |
| LOC646769 |
| LOC646783 |
| LOC646784 |
| LOC646785 |
| LOC646786 |
| LOC646791 |
| LOC646808 |
| LOC646817 |
| LOC646819 |
| LOC646821 |
| LOC646836 |
| LOC646841 |
| LOC646849 |
| LOC646897 |
| LOC646900 |
| LOC646909 |
| LOC646916 |
| LOC646936 |
| LOC646942 |
| LOC646949 |
| LOC646956 |
| LOC646966 |
| LOC646993 |
| LOC646996 |
| LOC647000 |
| LOC647009 |
| LOC647012 |
| LOC647030 |
| LOC647037 |
| LOC647074 |
| LOC647081 |
| LOC647086 |
| LOC647099 |
| LOC647104 |
| LOC647150 |
| LOC647243 |
| LOC647276 |
| LOC647285 |
| LOC647288 |
| LOC647302 |
| LOC647307 |
| LOC647322 |
| LOC647340 |
| LOC647346 |
| LOC647349 |
| LOC647361 |
| LOC647363 |
| LOC647389 |
| LOC647436 |

|           |
|-----------|
| LOC647450 |
| LOC647456 |
| LOC647474 |
| LOC647597 |
| LOC647673 |
| LOC647691 |
| LOC647718 |
| LOC647741 |
| LOC647784 |
| LOC647805 |
| LOC647834 |
| LOC647856 |
| LOC647859 |
| LOC647886 |
| LOC647949 |
| LOC647954 |
| LOC647971 |
| LOC648000 |
| LOC648024 |
| LOC648057 |
| LOC648059 |
| LOC648099 |
| LOC648103 |
| LOC648153 |
| LOC648176 |
| LOC648210 |
| LOC648237 |
| LOC648249 |
| LOC648283 |
| LOC648294 |
| LOC648342 |
| LOC648343 |
| LOC648370 |
| LOC648390 |
| LOC648399 |
| LOC648434 |
| LOC648526 |
| LOC648581 |
| LOC648605 |
| LOC648622 |
| LOC648638 |
| LOC648659 |
| LOC648665 |
| LOC648695 |
| LOC648705 |
| LOC648729 |
| LOC648732 |
| LOC648740 |
| LOC648742 |
| LOC648758 |

|           |
|-----------|
| LOC648771 |
| LOC648822 |
| LOC648852 |
| LOC648907 |
| LOC648921 |
| LOC648927 |
| LOC648931 |
| LOC648980 |
| LOC649009 |
| LOC649044 |
| LOC649049 |
| LOC649076 |
| LOC649143 |
| LOC649150 |
| LOC649169 |
| LOC649209 |
| LOC649214 |
| LOC649299 |
| LOC649330 |
| LOC649346 |
| LOC649365 |
| LOC649422 |
| LOC649445 |
| LOC649447 |
| LOC649548 |
| LOC649553 |
| LOC649555 |
| LOC649639 |
| LOC649679 |
| LOC649754 |
| LOC649821 |
| LOC649839 |
| LOC649864 |
| LOC649873 |
| LOC649946 |
| LOC649970 |
| LOC650029 |
| LOC650034 |
| LOC650116 |
| LOC650128 |
| LOC650152 |
| LOC650157 |
| LOC650215 |
| LOC650263 |
| LOC650276 |
| LOC650298 |
| LOC650321 |
| LOC650369 |
| LOC650406 |
| LOC650515 |

|           |
|-----------|
| LOC650518 |
| LOC650526 |
| LOC650646 |
| LOC650698 |
| LOC650717 |
| LOC650737 |
| LOC650739 |
| LOC650803 |
| LOC650826 |
| LOC650832 |
| LOC650840 |
| LOC650898 |
| LOC650909 |
| LOC651064 |
| LOC651137 |
| LOC651143 |
| LOC651149 |
| LOC651166 |
| LOC651198 |
| LOC651202 |
| LOC651296 |
| LOC651302 |
| LOC651380 |
| LOC651436 |
| LOC651453 |
| LOC651556 |
| LOC651575 |
| LOC651576 |
| LOC651697 |
| LOC651745 |
| LOC651816 |
| LOC651894 |
| LOC651919 |
| LOC652002 |
| LOC652071 |
| LOC652097 |
| LOC652281 |
| LOC652322 |
| LOC652324 |
| LOC652330 |
| LOC652377 |
| LOC652388 |
| LOC652458 |
| LOC652470 |
| LOC652481 |
| LOC652489 |
| LOC652534 |
| LOC652541 |
| LOC652545 |
| LOC652565 |

|           |
|-----------|
| LOC652577 |
| LOC652595 |
| LOC652607 |
| LOC652608 |
| LOC652615 |
| LOC652624 |
| LOC652672 |
| LOC652675 |
| LOC652685 |
| LOC652694 |
| LOC652726 |
| LOC652741 |
| LOC652755 |
| LOC652826 |
| LOC652838 |
| LOC652864 |
| LOC652900 |
| LOC652903 |
| LOC652968 |
| LOC652993 |
| LOC653071 |
| LOC653079 |
| LOC653080 |
| LOC653086 |
| LOC653103 |
| LOC653108 |
| LOC653111 |
| LOC653147 |
| LOC653156 |
| LOC653158 |
| LOC653162 |
| LOC653171 |
| LOC653210 |
| LOC653226 |
| LOC653232 |
| LOC653242 |
| LOC653308 |
| LOC653314 |
| LOC653324 |
| LOC653344 |
| LOC653354 |
| LOC653375 |
| LOC653377 |
| LOC653381 |
| LOC653382 |
| LOC653419 |
| LOC653421 |
| LOC653438 |
| LOC653450 |
| LOC653468 |



|           |
|-----------|
| LOC653471 |
| LOC653472 |
| LOC653479 |
| LOC653487 |
| LOC653489 |
| LOC653496 |
| LOC653505 |
| LOC653506 |
| LOC653557 |
| LOC653566 |
| LOC653583 |
| LOC653590 |
| LOC653596 |
| LOC653604 |
| LOC653631 |
| LOC653635 |
| LOC653658 |
| LOC653663 |
| LOC653702 |
| LOC653737 |
| LOC653752 |
| LOC653773 |
| LOC653778 |
| LOC653820 |
| LOC653829 |
| LOC653874 |
| LOC653877 |
| LOC653878 |
| LOC653881 |
| LOC653884 |
| LOC653888 |
| LOC653972 |
| LOC653994 |
| LOC654000 |
| LOC654069 |
| LOC654074 |
| LOC654085 |
| LOC654103 |
| LOC654109 |
| LOC654121 |
| LOC654123 |
| LOC654126 |
| LOC654155 |
| LOC654161 |
| LOC654174 |
| LOC654189 |
| LOC654191 |
| LOC654194 |
| LOC654244 |
| LOC654260 |

|           |
|-----------|
| LOC654350 |
| LOC678655 |
| LOC723972 |
| LOC727726 |
| LOC727732 |
| LOC727735 |
| LOC727758 |
| LOC727761 |
| LOC727762 |
| LOC727773 |
| LOC727803 |
| LOC727808 |
| LOC727818 |
| LOC727820 |
| LOC727821 |
| LOC727825 |
| LOC727826 |
| LOC727848 |
| LOC727865 |
| LOC727868 |
| LOC727877 |
| LOC727884 |
| LOC727899 |
| LOC727914 |
| LOC727935 |
| LOC727947 |
| LOC727948 |
| LOC727962 |
| LOC727963 |
| LOC727967 |
| LOC727970 |
| LOC727980 |
| LOC727984 |
| LOC727987 |
| LOC728002 |
| LOC728006 |
| LOC728014 |
| LOC728026 |
| LOC728031 |
| LOC728034 |
| LOC728037 |
| LOC728059 |
| LOC728060 |
| LOC728069 |
| LOC728086 |
| LOC728098 |
| LOC728105 |
| LOC728115 |
| LOC728116 |
| LOC728126 |

|           |
|-----------|
| LOC728127 |
| LOC728128 |
| LOC728138 |
| LOC728139 |
| LOC728142 |
| LOC728153 |
| LOC728170 |
| LOC728179 |
| LOC728181 |
| LOC728188 |
| LOC728190 |
| LOC728207 |
| LOC728208 |
| LOC728226 |
| LOC728229 |
| LOC728244 |
| LOC728247 |
| LOC728263 |
| LOC728275 |
| LOC728310 |
| LOC728312 |
| LOC728324 |
| LOC728368 |
| LOC728408 |
| LOC728411 |
| LOC728416 |
| LOC728417 |
| LOC728428 |
| LOC728431 |
| LOC728440 |
| LOC728448 |
| LOC728452 |
| LOC728453 |
| LOC728457 |
| LOC728465 |
| LOC728467 |
| LOC728470 |
| LOC728473 |
| LOC728476 |
| LOC728481 |
| LOC728484 |
| LOC728485 |
| LOC728492 |
| LOC728499 |
| LOC728509 |
| LOC728517 |
| LOC728518 |
| LOC728530 |
| LOC728532 |
| LOC728533 |

|           |
|-----------|
| LOC728537 |
| LOC728553 |
| LOC728554 |
| LOC728556 |
| LOC728564 |
| LOC728565 |
| LOC728572 |
| LOC728576 |
| LOC728590 |
| LOC728591 |
| LOC728602 |
| LOC728620 |
| LOC728635 |
| LOC728640 |
| LOC728643 |
| LOC728650 |
| LOC728653 |
| LOC728658 |
| LOC728661 |
| LOC728666 |
| LOC728672 |
| LOC728678 |
| LOC728686 |
| LOC728689 |
| LOC728693 |
| LOC728698 |
| LOC728715 |
| LOC728728 |
| LOC728732 |
| LOC728734 |
| LOC728739 |
| LOC728741 |
| LOC728743 |
| LOC728755 |
| LOC728758 |
| LOC728772 |
| LOC728774 |
| LOC728779 |
| LOC728780 |
| LOC728782 |
| LOC728787 |
| LOC728791 |
| LOC728802 |
| LOC728809 |
| LOC728820 |
| LOC728823 |
| LOC728825 |
| LOC728830 |
| LOC728832 |
| LOC728843 |

|           |
|-----------|
| LOC728844 |
| LOC728855 |
| LOC728873 |
| LOC728877 |
| LOC728888 |
| LOC728889 |
| LOC728901 |
| LOC728903 |
| LOC728908 |
| LOC728919 |
| LOC728931 |
| LOC728937 |
| LOC728944 |
| LOC728953 |
| LOC728965 |
| LOC728969 |
| LOC728971 |
| LOC728973 |
| LOC728975 |
| LOC728979 |
| LOC728992 |
| LOC729004 |
| LOC729009 |
| LOC729021 |
| LOC729046 |
| LOC729057 |
| LOC729081 |
| LOC729082 |
| LOC729086 |
| LOC729090 |
| LOC729101 |
| LOC729102 |
| LOC729120 |
| LOC729123 |
| LOC729137 |
| LOC729142 |
| LOC729143 |
| LOC729148 |
| LOC729157 |
| LOC729200 |
| LOC729208 |
| LOC729217 |
| LOC729222 |
| LOC729234 |
| LOC729236 |
| LOC729255 |
| LOC729259 |
| LOC729272 |
| LOC729279 |
| LOC729298 |

|           |
|-----------|
| LOC729301 |
| LOC729313 |
| LOC729317 |
| LOC729324 |
| LOC729332 |
| LOC729340 |
| LOC729342 |
| LOC729348 |
| LOC729351 |
| LOC729362 |
| LOC729366 |
| LOC729372 |
| LOC729375 |
| LOC729389 |
| LOC729397 |
| LOC729402 |
| LOC729404 |
| LOC729406 |
| LOC729409 |
| LOC729417 |
| LOC729421 |
| LOC729423 |
| LOC729438 |
| LOC729439 |
| LOC729446 |
| LOC729466 |
| LOC729484 |
| LOC729495 |
| LOC729500 |
| LOC729505 |
| LOC729510 |
| LOC729513 |
| LOC729519 |
| LOC729535 |
| LOC729559 |
| LOC729570 |
| LOC729580 |
| LOC729587 |
| LOC729595 |
| LOC729603 |
| LOC729608 |
| LOC729617 |
| LOC729646 |
| LOC729660 |
| LOC729666 |
| LOC729669 |
| LOC729677 |
| LOC729679 |
| LOC729680 |
| LOC729683 |

|           |
|-----------|
| LOC729684 |
| LOC729686 |
| LOC729687 |
| LOC729692 |
| LOC729708 |
| LOC729742 |
| LOC729760 |
| LOC729764 |
| LOC729768 |
| LOC729769 |
| LOC729774 |
| LOC729776 |
| LOC729779 |
| LOC729780 |
| LOC729789 |
| LOC729798 |
| LOC729806 |
| LOC729810 |
| LOC729816 |
| LOC729841 |
| LOC729843 |
| LOC729858 |
| LOC729859 |
| LOC729885 |
| LOC729887 |
| LOC729898 |
| LOC729903 |
| LOC729920 |
| LOC729926 |
| LOC729941 |
| LOC729950 |
| LOC729952 |
| LOC729954 |
| LOC729960 |
| LOC729964 |
| LOC729970 |
| LOC729978 |
| LOC729985 |
| LOC729992 |
| LOC730004 |
| LOC730005 |
| LOC730012 |
| LOC730020 |
| LOC730024 |
| LOC730029 |
| LOC730050 |
| LOC730051 |
| LOC730052 |
| LOC730060 |
| LOC730074 |

|           |
|-----------|
| LOC730081 |
| LOC730098 |
| LOC730101 |
| LOC730107 |
| LOC730134 |
| LOC730167 |
| LOC730173 |
| LOC730176 |
| LOC730183 |
| LOC730187 |
| LOC730202 |
| LOC730234 |
| LOC730235 |
| LOC730246 |
| LOC730254 |
| LOC730255 |
| LOC730256 |
| LOC730273 |
| LOC730278 |
| LOC730284 |
| LOC730286 |
| LOC730288 |
| LOC730313 |
| LOC730316 |
| LOC730323 |
| LOC730324 |
| LOC730382 |
| LOC730413 |
| LOC730415 |
| LOC730417 |
| LOC730427 |
| LOC730432 |
| LOC730455 |
| LOC730525 |
| LOC730534 |
| LOC730535 |
| LOC730704 |
| LOC730740 |
| LOC730744 |
| LOC730746 |
| LOC730754 |
| LOC730820 |
| LOC730841 |
| LOC730990 |
| LOC730993 |
| LOC730994 |
| LOC731007 |
| LOC731049 |
| LOC731096 |
| LOC731139 |



|           |
|-----------|
| LOC731231 |
| LOC731308 |
| LOC731314 |
| LOC731365 |
| LOC731542 |
| LOC731640 |
| LOC731642 |
| LOC731724 |
| LOC731751 |
| LOC731777 |
| LOC731779 |
| LOC731789 |
| LOC731835 |
| LOC731878 |
| LOC731895 |
| LOC731915 |
| LOC731932 |
| LOC731950 |
| LOC731954 |
| LOC731985 |
| LOC731999 |
| LOC732007 |
| LOC732075 |
| LOC732146 |
| LOC732165 |
| LOC732172 |
| LOC732360 |
| LOC732425 |
| LOC791120 |
| LOC81691  |
| LOC88523  |
| LOC90120  |
| LOC90342  |
| LOC90586  |
| LOC90624  |
| LOC91316  |
| LOC91431  |
| LOC91461  |
| LOC91561  |
| LOC91661  |
| LOC92249  |
| LOC92497  |
| LOC92659  |
| LOC92755  |
| LOC92973  |
| LOC93622  |
| LOH12CR1  |
| LONP1     |
| LONP2     |
| LONRF1    |

|         |
|---------|
| LOXL1   |
| LOXL3   |
| LPAR1   |
| LPAR2   |
| LPAR3   |
| LPCAT1  |
| LPCAT2  |
| LPCAT3  |
| LPCAT4  |
| LPGAT1  |
| LPHN1   |
| LPHN2   |
| LPHN3   |
| LPIN1   |
| LPIN2   |
| LPP     |
| LPPR3   |
| LPXN    |
| LQK1    |
| LRAP    |
| LRBA    |
| LRCH2   |
| LRCH3   |
| LRCH4   |
| LRDD    |
| LRFN3   |
| LRFN4   |
| LRFN5   |
| LRG1    |
| LRIG1   |
| LRIG2   |
| LRP1    |
| LRP10   |
| LRP11   |
| LRP1B   |
| LRP2    |
| LRP3    |
| LRP4    |
| LRP5    |
| LRP5L   |
| LRP6    |
| LRP8    |
| LRPAP1  |
| LRPPRC  |
| LRRC1   |
| LRRC14  |
| LRRC16  |
| LRRC16A |
| LRRC20  |
| LRRC23  |

|          |
|----------|
| LRRC28   |
| LRRC3    |
| LRRC32   |
| LRRC37B  |
| LRRC37B2 |
| LRRC40   |
| LRRC41   |
| LRRC42   |
| LRRC45   |
| LRRC47   |
| LRRC49   |
| LRRC57   |
| LRRC58   |
| LRRC59   |
| LRRC6    |
| LRRC61   |
| LRRC69   |
| LRRC8A   |
| LRRC8D   |
| LRRC8E   |
| LRRC1    |
| LRRFIP1  |
| LRRFIP2  |
| LRRN1    |
| LRRN2    |
| LRRN4    |
| LRSAM1   |
| LRTOMT   |
| LRWD1    |
| LSAMP    |
| LSG1     |
| LSM1     |
| LSM10    |
| LSM12    |
| LSM14A   |
| LSM2     |
| LSM3     |
| LSM4     |
| LSM5     |
| LSM6     |
| LSM7     |
| LSM8     |
| LSMD1    |
| LSP1     |
| LSR      |
| LSS      |
| LTA      |
| LTA4H    |
| LTB4R    |
| LTBP2    |

|          |
|----------|
| LTBP3    |
| LTBP4    |
| LTBR     |
| LTV1     |
| LUC7L    |
| LUC7L2   |
| LUM      |
| LUZP1    |
| LXN      |
| LY6E     |
| LYAR     |
| LYL1     |
| LYN      |
| LYPD1    |
| LYPD3    |
| LYPD6    |
| LYPD6B   |
| LYPLA1   |
| LYPLA2   |
| LYPLAL1  |
| LYRM1    |
| LYRM2    |
| LYRM4    |
| LYRM5    |
| LYRM7    |
| LYSMD1   |
| LYSMD2   |
| LYSMD3   |
| LYSMD4   |
| LZIC     |
| LZTFL1   |
| LZTR1    |
| LZTS2    |
| M6PR     |
| M6PRBP1  |
| MAB21L2  |
| MACF1    |
| MACROD1  |
| MAD1L1   |
| MAD2L1   |
| MAD2L1BP |
| MAD2L2   |
| MADD     |
| MAEA     |
| MAF      |
| MAF1     |
| MAFB     |
| MAFF     |
| MAFG     |
| MAGEC2   |

|           |
|-----------|
| MAGED1    |
| MAGED2    |
| MAGED4B   |
| MAGEE1    |
| MAGEF1    |
| MAGEH1    |
| MAGEL2    |
| MAGI1     |
| Magmas    |
| MAGOH     |
| MAGOHB    |
| MAGT1     |
| MAK10     |
| MAK16     |
| MAL2      |
| MALT1     |
| MAMDC2    |
| MAML1     |
| MAN1A1    |
| MAN1A2    |
| MAN1B1    |
| MAN1C1    |
| MAN2A1    |
| MAN2B1    |
| MAN2B2    |
| MAN2C1    |
| MANBA     |
| MANBAL    |
| MANEA     |
| MANSC1    |
| MAOA      |
| MAP1B     |
| MAP1LC3A  |
| MAP1LC3B  |
| MAP1S     |
| MAP2K1    |
| MAP2K1IP1 |
| MAP2K2    |
| MAP2K3    |
| MAP2K4    |
| MAP2K5    |
| MAP2K7    |
| MAP3K1    |
| MAP3K10   |
| MAP3K11   |
| MAP3K12   |
| MAP3K14   |
| MAP3K2    |
| MAP3K3    |
| MAP3K4    |

|           |
|-----------|
| MAP3K6    |
| MAP3K7    |
| MAP3K7IP1 |
| MAP3K7IP2 |
| MAP3K8    |
| MAP3K9    |
| MAP4      |
| MAP4K1    |
| MAP4K2    |
| MAP4K3    |
| MAP4K4    |
| MAP4K5    |
| MAP6D1    |
| MAP7      |
| MAP7D1    |
| MAP7D3    |
| MAPBPIP   |
| MAPK1     |
| MAPK10    |
| MAPK13    |
| MAPK3     |
| MAPK4     |
| MAPK6     |
| MAPK7     |
| MAPK8IP1  |
| MAPK8IP3  |
| MAPK9     |
| MAPKAP1   |
| MAPKAPK2  |
| MAPKAPK3  |
| MAPKAPK5  |
| MAPKSP1   |
| MAPRE1    |
| MAPRE2    |
| MAPRE3    |
| 11. Mrz   |
| 02. Mrz   |
| 03. Mrz   |
| 05. Mrz   |
| 06. Mrz   |
| 07. Mrz   |
| MARCKS    |
| MARCKSL1  |
| MARK1     |
| MARK2     |
| MARK3     |
| MARS      |
| MARS2     |
| MARVELD1  |
| MARVELD2  |

|          |
|----------|
| MARVELD3 |
| MASP1    |
| MAST2    |
| MAST3    |
| MASTL    |
| MAT2A    |
| MAT2B    |
| MATK     |
| MATN2    |
| MATN3    |
| MATR3    |
| MAX      |
| MBD1     |
| MBD2     |
| MBD3     |
| MBD4     |
| MBD6     |
| MBIP     |
| MBL1P1   |
| MBLAC2   |
| MBNL1    |
| MBNL2    |
| MBNL3    |
| MBOAT1   |
| MBOAT2   |
| MBOAT7   |
| MBP      |
| MBTD1    |
| MBTPS1   |
| MC1R     |
| MCART1   |
| MCAT     |
| MCCC1    |
| MCEE     |
| MCF2L    |
| MCFD2    |
| MCHR2    |
| MCL1     |
| MCM10    |
| MCM2     |
| MCM3     |
| MCM3AP   |
| MCM3APAS |
| MCM4     |
| MCM5     |
| MCM6     |
| MCM7     |
| MCM8     |
| MCOLN1   |
| MCOLN2   |

|        |
|--------|
| MCOLN3 |
| MCPH1  |
| MCRS1  |
| MCTS1  |
| MDC1   |
| MDH1   |
| MDH2   |
| MDK    |
| MDN1   |
| MDP1   |
| MDS1   |
| ME1    |
| ME2    |
| ME3    |
| MEA1   |
| MEAF6  |
| MECR   |
| MED1   |
| MED10  |
| MED11  |
| MED12  |
| MED13  |
| MED13L |
| MED14  |
| MED15  |
| MED16  |
| MED17  |
| MED18  |
| MED19  |
| MED20  |
| MED21  |
| MED22  |
| MED23  |
| MED24  |
| MED25  |
| MED26  |
| MED27  |
| MED28  |
| MED29  |
| MED30  |
| MED31  |
| MED4   |
| MED6   |
| MED7   |
| MED8   |
| MED9   |
| MEF2D  |
| MEG8   |
| MEGF10 |
| MEGF6  |



|           |
|-----------|
| MEGF8     |
| MEIS1     |
| MEIS2     |
| MEIS3     |
| MEIS3P1   |
| MELK      |
| MEMO1     |
| MEN1      |
| MEPCE     |
| MERTK     |
| MESDC1    |
| MEST      |
| MET       |
| METAP1    |
| METAP2    |
| METRNL    |
| METRNL    |
| METT10D   |
| METT11D1  |
| METT5D1   |
| METTLL1   |
| METTLL10  |
| METTLL11A |
| METTLL13  |
| METTLL14  |
| METTLL2A  |
| METTLL3   |
| METTLL4   |
| METTLL5   |
| METTLL6   |
| METTLL7A  |
| METTLL7B  |
| METTLL9   |
| MEX3A     |
| MEX3B     |
| MEX3C     |
| MEX3D     |
| MFAP1     |
| MFAP2     |
| MFAP3     |
| MFAP3L    |
| MFAP4     |
| MFAP5     |
| MFF       |
| MFGE8     |
| MFHAS1    |
| MFN1      |
| MFN2      |
| MFSD1     |
| MFSD10    |

|           |
|-----------|
| MFSD11    |
| MFSD3     |
| MFSD5     |
| MFSD6     |
| MFSD6L    |
| MFSD8     |
| MGA       |
| MGAT1     |
| MGAT2     |
| MGAT3     |
| MGAT4A    |
| MGAT4B    |
| MGC102966 |
| MGC10997  |
| MGC11082  |
| MGC12760  |
| MGC12965  |
| MGC13057  |
| MGC15634  |
| MGC15763  |
| MGC16121  |
| MGC16169  |
| MGC16384  |
| MGC16703  |
| MGC18216  |
| MGC20983  |
| MGC23284  |
| MGC24103  |
| MGC26356  |
| MGC27345  |
| MGC27348  |
| MGC2752   |
| MGC29506  |
| MGC3020   |
| MGC3032   |
| MGC3196   |
| MGC33556  |
| MGC35361  |
| MGC3731   |
| MGC39900  |
| MGC40489  |
| MGC42630  |
| MGC4677   |
| MGC52000  |
| MGC57346  |
| MGC57359  |
| MGC61598  |
| MGC70857  |
| MGC71993  |
| MGC72080  |

|           |
|-----------|
| MGC72104  |
| MGC87042  |
| MGC87895  |
| MGEA5     |
| MGMT      |
| MGRN1     |
| MGST1     |
| MGST2     |
| MGST3     |
| MIA3      |
| MIB1      |
| MIB2      |
| MICAL1    |
| MICALL1   |
| MICB      |
| MID1      |
| MID1IP1   |
| MID2      |
| MIDN      |
| MIER1     |
| MIER2     |
| MIF       |
| MIF4GD    |
| MIIP      |
| MINA      |
| MINK1     |
| MINPP1    |
| MIOS      |
| MIPEP     |
| MIPOL1    |
| MIR1185-1 |
| MIR1228   |
| MIR125B2  |
| MIR129-2  |
| MIR130A   |
| MIR1909   |
| MIR1974   |
| MIR1978   |
| MIR205    |
| MIR2116   |
| MIR25     |
| MIR300    |
| MIR342    |
| MIR345    |
| MIR373    |
| MIR488    |
| MIR557    |
| MIR586    |
| MIR599    |
| MIR607    |

|         |
|---------|
| MIR657  |
| MIR877  |
| MIR886  |
| MIR98   |
| MIS12   |
| MITD1   |
| MITF    |
| MKI67   |
| MKI67IP |
| MKKS    |
| MKL1    |
| MKL2    |
| MKLN1   |
| MKNK1   |
| MKNK2   |
| MKRN1   |
| MKRN2   |
| MKS1    |
| MLC1    |
| MLEC    |
| MLF1    |
| MLF1IP  |
| MLF2    |
| MLH1    |
| MLH3    |
| MLL     |
| MLL4    |
| MLL5    |
| MLLT10  |
| MLLT11  |
| MLLT6   |
| MLPH    |
| MLST8   |
| MLX     |
| MLXIPL  |
| MLYCD   |
| MMAA    |
| MMAB    |
| MMACHC  |
| MMADHC  |
| MMD     |
| MME     |
| MMGT1   |
| MMP11   |
| MMP15   |
| MMP2    |
| MMP23A  |
| MMP23B  |
| MMP24   |
| MMP28   |

|           |
|-----------|
| MMS19     |
| MMS19L    |
| MN1       |
| MNAT1     |
| MND1      |
| MNS1      |
| MNT       |
| MNX1      |
| MOAP1     |
| MOBK1B    |
| MOBKL1A   |
| MOBKL1B   |
| MOBKL2A   |
| MOBKL2B   |
| MOBKL2C   |
| MOBKL3    |
| MOCOS     |
| MOCS1     |
| MOGS      |
| MON1A     |
| MON1B     |
| MON2      |
| MORC2     |
| MORC4     |
| MORF4L1   |
| MORF4L2   |
| MORG1     |
| MORN2     |
| MORN4     |
| MOS       |
| MOSC1     |
| MOSC2     |
| MOSPD1    |
| MOSPD2    |
| MOSPD3    |
| MOV10     |
| MPDU1     |
| MPDZ      |
| MPG       |
| MPHOSPH10 |
| MPHOSPH6  |
| MPHOSPH8  |
| MPHOSPH9  |
| MPI       |
| MPND      |
| MPP1      |
| MPP5      |
| MPP6      |
| MPPE1     |
| MPPED2    |

|          |
|----------|
| MPRIP    |
| MPST     |
| MPV17    |
| MPV17L2  |
| MPZ      |
| MPZL1    |
| MPZL2    |
| MRAP2    |
| MRC2     |
| MRE11A   |
| MRFAP1   |
| MRFAP1L1 |
| MRI1     |
| MRLC2    |
| MRP63    |
| MRPL1    |
| MRPL10   |
| MRPL11   |
| MRPL12   |
| MRPL13   |
| MRPL14   |
| MRPL15   |
| MRPL16   |
| MRPL17   |
| MRPL18   |
| MRPL19   |
| MRPL2    |
| MRPL20   |
| MRPL21   |
| MRPL22   |
| MRPL23   |
| MRPL24   |
| MRPL27   |
| MRPL28   |
| MRPL3    |
| MRPL30   |
| MRPL32   |
| MRPL33   |
| MRPL34   |
| MRPL35   |
| MRPL36   |
| MRPL37   |
| MRPL38   |
| MRPL39   |
| MRPL4    |
| MRPL40   |
| MRPL41   |
| MRPL42   |
| MRPL43   |
| MRPL44   |

|         |
|---------|
| MRPL45  |
| MRPL46  |
| MRPL47  |
| MRPL48  |
| MRPL49  |
| MRPL50  |
| MRPL51  |
| MRPL52  |
| MRPL53  |
| MRPL54  |
| MRPL55  |
| MRPL9   |
| MRPS10  |
| MRPS11  |
| MRPS12  |
| MRPS14  |
| MRPS15  |
| MRPS16  |
| MRPS17  |
| MRPS18A |
| MRPS18B |
| MRPS18C |
| MRPS2   |
| MRPS21  |
| MRPS22  |
| MRPS23  |
| MRPS24  |
| MRPS25  |
| MRPS26  |
| MRPS27  |
| MRPS28  |
| MRPS30  |
| MRPS31  |
| MRPS33  |
| MRPS34  |
| MRPS35  |
| MRPS36  |
| MRPS5   |
| MRPS6   |
| MRPS7   |
| MRPS9   |
| MRRF    |
| MRS2    |
| MRT04   |
| MSH2    |
| MSH3    |
| MSH5    |
| MSH6    |
| MSI1    |
| MSI2    |

|         |
|---------|
| MSL1    |
| MSL2    |
| MSL3    |
| MSL3L1  |
| MSN     |
| MSRB2   |
| MSRB3   |
| MST1    |
| MST4    |
| MSTO1   |
| MSX1    |
| MSX2    |
| MT1A    |
| MT1E    |
| MT1F    |
| MT1G    |
| MT1H    |
| MT1X    |
| MT2A    |
| MTA1    |
| MTA2    |
| MTA3    |
| MTAP    |
| MTBP    |
| MTCH1   |
| MTCH2   |
| MTCP1   |
| MTDH    |
| MTE     |
| MTERF   |
| MTERFD1 |
| MTF1    |
| MTF2    |
| MTFMT   |
| MTFR1   |
| MTG1    |
| MTHFD1  |
| MTHFD1L |
| MTHFD2  |
| MTHFD2L |
| MTHFR   |
| MTHFS   |
| MTHFSD  |
| MTIF2   |
| MTIF3   |
| MTL5    |
| MTM1    |
| MTMR1   |
| MTMR10  |
| MTMR11  |



|         |
|---------|
| MTMR12  |
| MTMR14  |
| MTMR15  |
| MTMR2   |
| MTMR3   |
| MTMR4   |
| MTMR6   |
| MTMR7   |
| MTMR9   |
| MTO1    |
| MTP18   |
| MTPN    |
| MTR     |
| MTRF1   |
| MTRF1L  |
| MTRR    |
| MTSS1   |
| MTUS1   |
| MTX1    |
| MTX2    |
| MTX3    |
| MUC1    |
| MUC16   |
| MUDENG  |
| MUL1    |
| MUM1    |
| MUM1L1  |
| MURC    |
| MUS81   |
| MUSTN1  |
| MUT     |
| MUTED   |
| MUTYH   |
| MVD     |
| MVK     |
| MVP     |
| MX1     |
| MXD1    |
| MXD3    |
| MXD4    |
| MXI1    |
| MXRA5   |
| MXRA7   |
| MYADM   |
| MYB     |
| MYBBP1A |
| MYBL1   |
| MYBL2   |
| MYC     |
| MYCBP   |

|         |
|---------|
| MYCBP2  |
| MYCN    |
| MYD88   |
| MYH10   |
| MYH9    |
| MYL12A  |
| MYL4    |
| MYL5    |
| MYL6    |
| MYL6B   |
| MYL7    |
| MYL9    |
| MYLIP   |
| MYNN    |
| MYO10   |
| MYO18A  |
| MYO19   |
| MYO1B   |
| MYO1C   |
| MYO1D   |
| MYO3A   |
| MYO3B   |
| MYO5A   |
| MYO5B   |
| MYO5C   |
| MYO6    |
| MYO9A   |
| MYO9B   |
| MYOF    |
| MYOM2   |
| MYOZ1   |
| MYOZ3   |
| MYPOP   |
| MYST1   |
| MYST2   |
| MYST3   |
| MZF1    |
| N4BP1   |
| N4BP2   |
| N4BP2L1 |
| N4BP2L2 |
| N6AMT1  |
| N6AMT2  |
| NAAA    |
| NAALAD2 |
| NAB1    |
| NAB2    |
| NACA    |
| NACA2   |
| NACAP1  |

|         |
|---------|
| NACC1   |
| NACC2   |
| NADK    |
| NADSYN1 |
| NAE1    |
| NAF1    |
| NAG18   |
| NAGA    |
| NAGK    |
| NAGLU   |
| NAGPA   |
| NAIF1   |
| NAMPT   |
| NANOS1  |
| NANOS3  |
| NANS    |
| NAP1L1  |
| NAP1L3  |
| NAP1L4  |
| NAP1L5  |
| NAP1L6  |
| NAPA    |
| NAPB    |
| NAPEPLD |
| NAPG    |
| NAPRT1  |
| NARF    |
| NARFL   |
| NARG1   |
| NARG1L  |
| NARG2   |
| NARS    |
| NARS2   |
| NASP    |
| NAT10   |
| NAT11   |
| NAT12   |
| NAT13   |
| NAT14   |
| NAT15   |
| NAT5    |
| NAT6    |
| NAT9    |
| NAV1    |
| NAV2    |
| NBAS    |
| NBEA    |
| NBEAL2  |
| NBL1    |
| NBN     |

|            |
|------------|
| NBPF1      |
| NBPF10     |
| NBPF14     |
| NBPF20     |
| NBPF3      |
| NBPF8      |
| NBR2       |
| NCALD      |
| NCAM1      |
| NCAN       |
| NCAPD2     |
| NCAPD3     |
| NCAPG      |
| NCAPG2     |
| NCAPH2     |
| NCBP1      |
| NCBP2      |
| NCCRP1     |
| NCDN       |
| NCK1       |
| NCK2       |
| NCKAP1     |
| NCKIPSD    |
| NCL        |
| NCLN       |
| NCOA1      |
| NCOA3      |
| NCOA4      |
| NCOA5      |
| NCOA6      |
| NCOA6IP    |
| NCOA7      |
| NCOR1      |
| NCOR2      |
| NCRNA00081 |
| NCRNA00085 |
| NCRNA00087 |
| NCRNA00092 |
| NCRNA00094 |
| NCRNA00095 |
| NCRNA00152 |
| NCRNA00153 |
| NCRNA00200 |
| NCRNA00219 |
| NCSTN      |
| NDC80      |
| NDE1       |
| NDEL1      |
| NDFIP1     |
| NDFIP2     |

|         |
|---------|
| NDN     |
| NDNL2   |
| NDRG1   |
| NDRG2   |
| NDRG3   |
| NDRG4   |
| NDST1   |
| NDST2   |
| NDUFA1  |
| NDUFA10 |
| NDUFA11 |
| NDUFA12 |
| NDUFA13 |
| NDUFA2  |
| NDUFA3  |
| NDUFA4  |
| NDUFA5  |
| NDUFA6  |
| NDUFA7  |
| NDUFA8  |
| NDUFA9  |
| NDUFAB1 |
| NDUFAF1 |
| NDUFAF2 |
| NDUFAF3 |
| NDUFB1  |
| NDUFB10 |
| NDUFB11 |
| NDUFB2  |
| NDUFB3  |
| NDUFB5  |
| NDUFB6  |
| NDUFB7  |
| NDUFB8  |
| NDUFB9  |
| NDUFC1  |
| NDUFS1  |
| NDUFS2  |
| NDUFS3  |
| NDUFS4  |
| NDUFS5  |
| NDUFS7  |
| NDUFS8  |
| NDUFV1  |
| NDUFV2  |
| NDUFV3  |
| NEBL    |
| NECAB3  |
| NECAP1  |
| NECAP2  |

|          |
|----------|
| NEDD1    |
| NEDD4    |
| NEDD4L   |
| NEDD8    |
| NEDD9    |
| NEFH     |
| NEIL2    |
| NEIL3    |
| NEK1     |
| NEK2     |
| NEK3     |
| NEK6     |
| NEK8     |
| NELF     |
| NELL2    |
| NENF     |
| NEO1     |
| NES      |
| NET1     |
| NETO2    |
| NEU1     |
| NEURL1B  |
| NEURL2   |
| NEURL4   |
| NEUROG2  |
| NEXN     |
| NF1      |
| NFAT5    |
| NFATC1   |
| NFATC2IP |
| NFATC3   |
| NFE2     |
| NFE2L1   |
| NFE2L2   |
| NFE2L3   |
| NFIB     |
| NFIL3    |
| NFKB1    |
| NFKB2    |
| NFKBIA   |
| NFKBIB   |
| NFKBID   |
| NFKBIE   |
| NFKBIL2  |
| NFKBIZ   |
| NFRKB    |
| NFU1     |
| NFX1     |
| NFXL1    |
| NFYA     |

|           |
|-----------|
| NFYB      |
| NFYC      |
| NGDN      |
| NGEF      |
| NGF       |
| NGFRAP1   |
| NGLY1     |
| NGRN      |
| NHLRC2    |
| NHLRC3    |
| NHP2      |
| NHP2L1    |
| NHS       |
| NICN1     |
| NID2      |
| NIF3L1    |
| NIN       |
| NINJ1     |
| NINL      |
| NIP30     |
| NIP7      |
| NIPA1     |
| NIPA2     |
| NIPBL     |
| NIPSNAP1  |
| NIPSNAP3A |
| NISCH     |
| NIT1      |
| NIT2      |
| NKAP      |
| NKD2      |
| NKIRAS1   |
| NKIRAS2   |
| NKRF      |
| NKTR      |
| NKX3-1    |
| NLE1      |
| NLGN1     |
| NLGN2     |
| NLGN4X    |
| NLGN4Y    |
| NLK       |
| NLN       |
| NLRP12    |
| NLRP7     |
| NLRP8     |
| NLRX1     |
| NMB       |
| NMD3      |
| NME1      |

|           |
|-----------|
| NME1-NME2 |
| NME2      |
| NME3      |
| NME4      |
| NME5      |
| NME6      |
| NME7      |
| NMI       |
| NMNAT1    |
| NMNAT2    |
| NMRAL1    |
| NMT1      |
| NMT2      |
| NMU       |
| NNT       |
| NOB1      |
| NOC2L     |
| NOC3L     |
| NOC4L     |
| NOD1      |
| NODAL     |
| NOL10     |
| NOL11     |
| NOL12     |
| NOL3      |
| NOL6      |
| NOL7      |
| NOL8      |
| NOLA1     |
| NOLC1     |
| NOMO1     |
| NOMO2     |
| NONO      |
| NOP10     |
| NOP14     |
| NOP16     |
| NOP2      |
| NOP56     |
| NOP58     |
| NOSIP     |
| NOTCH1    |
| NOTCH2    |
| NOTCH2NL  |
| NOTCH3    |
| NOVA1     |
| NOX4      |
| NOXA1     |
| NOXO1     |
| NP        |
| N-PAC     |



|         |
|---------|
| NPAL3   |
| NPAS1   |
| NPAT    |
| NPB     |
| NPC1    |
| NPC2    |
| NPDC1   |
| NPEPL1  |
| NPEPPS  |
| NPHP1   |
| NPHP3   |
| NPHP4   |
| NPIP    |
| NPLOC4  |
| NPM3    |
| NPPB    |
| NPR1    |
| NPR2    |
| NPTN    |
| NPW     |
| NPY     |
| NPY5R   |
| NQO1    |
| NQO2    |
| NR1D1   |
| NR1D2   |
| NR1H2   |
| NR1H3   |
| NR2C1   |
| NR2C2   |
| NR2C2AP |
| NR2F2   |
| NR2F6   |
| NR3C1   |
| NR3C2   |
| NR5A2   |
| NRAS    |
| NRBF2   |
| NRBP1   |
| NRBP2   |
| NRCAM   |
| NRD1    |
| NRGN    |
| NRIP1   |
| NRIP3   |
| NRK     |
| NRM     |
| NRP1    |
| NRSN2   |
| NSA2    |

|          |
|----------|
| NSBP1    |
| NSD1     |
| NSDHL    |
| NSF      |
| NSFL1C   |
| NSL1     |
| NSMAF    |
| NSMCE1   |
| NSMCE2   |
| NSMCE4A  |
| NSUN2    |
| NSUN3    |
| NSUN4    |
| NSUN5    |
| NSUN5B   |
| NSUN5C   |
| NSUN6    |
| NSUN7    |
| NT5C     |
| NT5C2    |
| NT5C3    |
| NT5C3L   |
| NT5DC1   |
| NT5DC2   |
| NT5DC3   |
| NT5M     |
| NTAN1    |
| NTF3     |
| NTHL1    |
| NTS      |
| NUAK1    |
| NUAK2    |
| NUB1     |
| NUBP1    |
| NUBP2    |
| NUBPL    |
| NUCB1    |
| NUCB2    |
| NUCKS1   |
| NUDC     |
| NUDCD1   |
| NUDCD2   |
| NUDCD3   |
| NUDT1    |
| NUDT11   |
| NUDT14   |
| NUDT15   |
| NUDT16   |
| NUDT16L1 |
| NUDT18   |

|          |
|----------|
| NUDT2    |
| NUDT21   |
| NUDT22   |
| NUDT3    |
| NUDT5    |
| NUDT6    |
| NUDT7    |
| NUDT9    |
| NUF2     |
| NUFIP1   |
| NUFIP2   |
| NUMA1    |
| NUMB     |
| NUMBL    |
| NUP107   |
| NUP133   |
| NUP153   |
| NUP155   |
| NUP160   |
| NUP188   |
| NUP205   |
| NUP210   |
| NUP214   |
| NUP35    |
| NUP37    |
| NUP43    |
| NUP50    |
| NUP54    |
| NUP62    |
| NUP62CL  |
| NUP85    |
| NUP88    |
| NUP93    |
| NUPL2    |
| NUPR1    |
| NUS1     |
| NUSAP1   |
| NUTF2    |
| NVL      |
| NXF1     |
| NXN      |
| NXNL1    |
| NXT1     |
| NXT2     |
| NYNRIN   |
| NY-REN-7 |
| OAF      |
| OAS1     |
| OAT      |
| OAZ1     |

|          |
|----------|
| OAZ2     |
| OBFC1    |
| OBFC2A   |
| OBFC2B   |
| OBSCN    |
| OBSL1    |
| OCEL1    |
| OCIAD1   |
| OCIAD2   |
| OCRL     |
| ODC1     |
| ODF2     |
| ODF2L    |
| ODZ3     |
| ODZ4     |
| OFD1     |
| OGDH     |
| OGDHL    |
| OGFOD1   |
| OGFR     |
| OGFRL1   |
| OGG1     |
| OGT      |
| OIP5     |
| OKL38    |
| OLFML3   |
| OMA1     |
| OPA1     |
| OPA3     |
| OPLAH    |
| OPN3     |
| OPRL1    |
| OPTN     |
| OR11H1   |
| OR1J1    |
| OR2A20P  |
| OR2A42   |
| OR2A9P   |
| OR2B2    |
| OR56B1   |
| OR7E156P |
| OR9A4    |
| ORAI1    |
| ORAI3    |
| ORAOV1   |
| ORC1L    |
| ORC2L    |
| ORC3L    |
| ORC4L    |
| ORC5L    |

|          |
|----------|
| ORC6L    |
| ORMDL1   |
| ORMDL2   |
| ORMDL3   |
| OS9      |
| OSAP     |
| OSBP     |
| OSBPL10  |
| OSBPL11  |
| OSBPL1A  |
| OSBPL2   |
| OSBPL3   |
| OSBPL5   |
| OSBPL6   |
| OSBPL7   |
| OSBPL8   |
| OSBPL9   |
| OSCP1    |
| OSGEP    |
| OSGEPL1  |
| OSGIN2   |
| OSTalpha |
| OSTC     |
| OSTCL    |
| OSTF1    |
| OSTM1    |
| OTP      |
| OTUB1    |
| OTUB2    |
| OTUD1    |
| OTUD3    |
| OTUD4    |
| OTUD5    |
| OTUD6B   |
| OTX2     |
| OVGP1    |
| OVOL2    |
| OXA1L    |
| OXCT1    |
| OXCT2    |
| OXR1     |
| OXSM     |
| OXSR1    |
| OXTR     |
| P15RS    |
| P2RX2    |
| P2RX4    |
| P2RY11   |
| P2RY5    |
| P2RY6    |

|          |
|----------|
| P4HA1    |
| P4HA2    |
| P4HB     |
| P4HTM    |
| P704P    |
| P76      |
| PA2G4    |
| PAAF1    |
| PABPC1   |
| PABPC1L  |
| PABPC3   |
| PABPC4   |
| PABPC4L  |
| PABPC5   |
| PABPN1   |
| PACS1    |
| PACS2    |
| PACSIN1  |
| PACSIN2  |
| PACSIN3  |
| PAF1     |
| PAFAH1B1 |
| PAFAH1B3 |
| PAFAH2   |
| PAG1     |
| PAGE4    |
| PAH      |
| PAICS    |
| PAIP1    |
| PAIP2    |
| PAK1     |
| PAK1IP1  |
| PAK2     |
| PAK4     |
| PAK6     |
| PALB2    |
| PALLD    |
| PALM     |
| PAM      |
| PAMR1    |
| PAN2     |
| PAN3     |
| PANK1    |
| PANK2    |
| PANK3    |
| PANK4    |
| PANX1    |
| PANX2    |
| PAOX     |
| PAPD1    |

|        |
|--------|
| PAPD4  |
| PAPD5  |
| PAPLN  |
| PAPOLA |
| PAPOLG |
| PAPPA  |
| PAPSS1 |
| PAPSS2 |
| PAQR3  |
| PAQR4  |
| PAQR6  |
| PAQR7  |
| PAQR8  |
| PAR5   |
| PARD3  |
| PARD6A |
| PARD6G |
| PARG   |
| PARK7  |
| PARL   |
| PARM1  |
| PARN   |
| PARP1  |
| PARP10 |
| PARP11 |
| PARP12 |
| PARP14 |
| PARP16 |
| PARP2  |
| PARP3  |
| PARP4  |
| PARP6  |
| PARP8  |
| PARP9  |
| PARS2  |
| PART1  |
| PARVA  |
| PARVB  |
| PASK   |
| PATE2  |
| PATE3  |
| PATL1  |
| PAWR   |
| PAXIP1 |
| PBK    |
| PBRM1  |
| PBX1   |
| PBX2   |
| PBX3   |
| PBXIP1 |

|          |
|----------|
| PC       |
| PCBD1    |
| PCBD2    |
| PCBP1    |
| PCBP2    |
| PCBP4    |
| PCCA     |
| PCCB     |
| PCDH10   |
| PCDH11X  |
| PCDH11Y  |
| PCDH17   |
| PCDH18   |
| PCDH19   |
| PCDH7    |
| PCDHA1   |
| PCDHA2   |
| PCDHA3   |
| PCDHA4   |
| PCDHB16  |
| PCDHB17  |
| PCDHB18  |
| PCDHB19P |
| PCDHB2   |
| PCDHB3   |
| PCDHB4   |
| PCDHB5   |
| PCDHB9   |
| PCDHGB6  |
| PCF11    |
| PCGF1    |
| PCGF2    |
| PCGF6    |
| PCID2    |
| PCIF1    |
| PCK2     |
| PCM1     |
| PCMT1    |
| PCMTD1   |
| PCMTD2   |
| PCNA     |
| PCNP     |
| PCNT     |
| PCNX     |
| PCNXL2   |
| PCNXL3   |
| PCOLCE   |
| PCOLCE2  |
| PCSK1N   |
| PCSK4    |



|         |
|---------|
| PCSK5   |
| PCSK7   |
| PCTK2   |
| PCTK3   |
| PCTP    |
| PCYOX1  |
| PCYOX1L |
| PCYT2   |
| PDCD10  |
| PDCD11  |
| PDCD2   |
| PDCD2L  |
| PDCD4   |
| PDCD5   |
| PDCD6   |
| PDCD6IP |
| PDCD7   |
| PDCL    |
| PDCL3   |
| PDDC1   |
| PDE4A   |
| PDE4C   |
| PDE4D   |
| PDE5A   |
| PDE6B   |
| PDE6D   |
| PDE7A   |
| PDE9A   |
| PDGFA   |
| PDGFC   |
| PDGFD   |
| PDGFRA  |
| PDGFRB  |
| PDGFRL  |
| PDHA1   |
| PDHB    |
| PDHX    |
| PDIA3P  |
| PDIA4   |
| PDIA5   |
| PDIA6   |
| PDIK1L  |
| PDK2    |
| PDK3    |
| PDK4    |
| PDLIM1  |
| PDLIM3  |
| PDLIM7  |
| PDP2    |
| PDPK1   |

|         |
|---------|
| PDPN    |
| PDPR    |
| PDRG1   |
| PDS5A   |
| PDS5B   |
| PDSS1   |
| PDSS2   |
| PDXDC1  |
| PDXK    |
| PDXP    |
| PDZD2   |
| PDZD8   |
| PDZK1   |
| PDZK1P1 |
| PDZRN3  |
| PEA15   |
| PEBP1   |
| PECI    |
| PECR    |
| PEF1    |
| PEG10   |
| PEG3    |
| PELI1   |
| PELI2   |
| PELO    |
| PELP1   |
| PEMT    |
| PEPD    |
| PER1    |
| PER2    |
| PER3    |
| PERP    |
| PES1    |
| PET112L |
| PEX1    |
| PEX10   |
| PEX11A  |
| PEX11B  |
| PEX11G  |
| PEX13   |
| PEX14   |
| PEX16   |
| PEX19   |
| PEX5    |
| PEX6    |
| PEX7    |
| PFAAP5  |
| PFAS    |
| PFDN1   |
| PFDN2   |

|         |
|---------|
| PFDN4   |
| PFDN5   |
| PFDN6   |
| PFKFB2  |
| PFKFB3  |
| PFKFB4  |
| PFKL    |
| PFKM    |
| PFKP    |
| PFN1    |
| PFN2    |
| PFTK1   |
| PGAM1   |
| PGAM4   |
| PGAM5   |
| PGAP1   |
| PGAP3   |
| PGBD1   |
| PGBD2   |
| PGBD3   |
| PGCP    |
| PGD     |
| PGF     |
| PGGT1B  |
| PGK1    |
| PGLS    |
| PGM1    |
| PGM2    |
| PGM2L1  |
| PGM3    |
| PGM5    |
| PGP     |
| PGRMC1  |
| PGRMC2  |
| PGS1    |
| PHACTR1 |
| PHACTR2 |
| PHACTR4 |
| PHAX    |
| PHB     |
| PHB2    |
| PHC1    |
| PHC2    |
| PHC3    |
| PHCA    |
| PHF1    |
| PHF10   |
| PHF11   |
| PHF12   |
| PHF13   |

|          |
|----------|
| PHF14    |
| PHF15    |
| PHF16    |
| PHF17    |
| PHF19    |
| PHF2     |
| PHF20    |
| PHF20L1  |
| PHF21A   |
| PHF21B   |
| PHF23    |
| PHF3     |
| PHF5A    |
| PHF7     |
| PHGDH    |
| PHIP     |
| PHKA1    |
| PHKA2    |
| PHKB     |
| PHKG2    |
| PHLDA1   |
| PHLDA3   |
| PHLDB1   |
| PHLDB2   |
| PHLDB3   |
| PHLPP1   |
| PHLPP2   |
| PHOSPHO2 |
| PHPT1    |
| PHRF1    |
| PHTF1    |
| PHYH     |
| PHYHD1   |
| PI15     |
| PI4K2A   |
| PI4K2B   |
| PI4KAP1  |
| PI4KAP2  |
| PI4KB    |
| PIAS1    |
| PIAS2    |
| PIAS3    |
| PIAS4    |
| PIB5PA   |
| PIBF1    |
| PICALM   |
| PICK1    |
| PIF1     |
| PIGA     |
| PIGC     |

|         |
|---------|
| PIGF    |
| PIGG    |
| PIGH    |
| PIGK    |
| PIGL    |
| PIGM    |
| PIGN    |
| PIGO    |
| PIGP    |
| PIGQ    |
| PIGS    |
| PIGT    |
| PIGU    |
| PIGV    |
| PIGW    |
| PIGX    |
| PIGY    |
| PIH1D1  |
| PIK3C2A |
| PIK3C2B |
| PIK3C3  |
| PIK3CA  |
| PIK3CB  |
| PIK3CD  |
| PIK3IP1 |
| PIK3R1  |
| PIK3R2  |
| PIK3R4  |
| PIK4CA  |
| PILRA   |
| PILRB   |
| PIM1    |
| PIM2    |
| PIM3    |
| PIN1    |
| PIN4    |
| PINK1   |
| PINX1   |
| PIP3-E  |
| PIP4K2A |
| PIP4K2B |
| PIP4K2C |
| PIP5K1C |
| PIP5K2A |
| PIP5K2B |
| PIPSL   |
| PIR     |
| PISD    |
| PITPNA  |
| PITPNB  |

|          |
|----------|
| PITPNC1  |
| PITPNM1  |
| PITRM1   |
| PITX1    |
| PITX2    |
| PJA1     |
| PJA2     |
| PKD1     |
| PKD2     |
| PKDCC    |
| PKIA     |
| PKIB     |
| PKIG     |
| PKM2     |
| PKMYT1   |
| PKN1     |
| PKN2     |
| PKN3     |
| PKNOX1   |
| PKNOX2   |
| PKP2     |
| PKP4     |
| PLA2G10  |
| PLA2G12A |
| PLA2G15  |
| PLA2G2D  |
| PLA2G4B  |
| PLA2G6   |
| PLAA     |
| PLAC1    |
| PLAC9    |
| PLAG1    |
| PLAGL1   |
| PLAGL2   |
| PLAT     |
| PLAU     |
| PLCB1    |
| PLCD1    |
| PLCD3    |
| PLCE1    |
| PLCG1    |
| PLCG2    |
| PLCL2    |
| PLCXD1   |
| PLCXD3   |
| PLD1     |
| PLD2     |
| PLD3     |
| PLDN     |
| PLEC1    |

|         |
|---------|
| PLEKHA1 |
| PLEKHA2 |
| PLEKHA3 |
| PLEKHA4 |
| PLEKHA5 |
| PLEKHA6 |
| PLEKHA7 |
| PLEKHA9 |
| PLEKHB2 |
| PLEKHF1 |
| PLEKHF2 |
| PLEKHG2 |
| PLEKHG3 |
| PLEKHG4 |
| PLEKHG6 |
| PLEKHH1 |
| PLEKHH3 |
| PLEKHJ1 |
| PLEKHM1 |
| PLEKHM2 |
| PLEKHN1 |
| PLEKHO1 |
| PLEKHO2 |
| PLIN2   |
| PLIN5   |
| PLK1    |
| PLK2    |
| PLK4    |
| PLLP    |
| PLOD1   |
| PLOD2   |
| PLOD3   |
| PLP1    |
| PLRG1   |
| PLS1    |
| PLS3    |
| PLSCR1  |
| PLSCR3  |
| PLSCR4  |
| PLTP    |
| PLXDC2  |
| PLXNA1  |
| PLXNA2  |
| PLXNA3  |
| PLXNA4  |
| PLXNB1  |
| PLXNB2  |
| PLXND1  |
| PMAIP1  |
| PMEPA1  |

|         |
|---------|
| PMF1    |
| PML     |
| PMM1    |
| PMM2    |
| PMP22   |
| PMPCA   |
| PMPCB   |
| PMS1    |
| PMS2    |
| PMS2CL  |
| PMS2L1  |
| PMS2L2  |
| PMS2L3  |
| PMS2L4  |
| PMS2L5  |
| PMVK    |
| PNCK    |
| PNKD    |
| PNKP    |
| PNMA1   |
| PNMAL1  |
| PNN     |
| PNO1    |
| PNPLA2  |
| PNPLA6  |
| PNPLA7  |
| PNPLA8  |
| PNPO    |
| PNPT1   |
| PNRC2   |
| PODXL   |
| POFUT1  |
| POFUT2  |
| POGK    |
| POGZ    |
| POL3S   |
| POLA1   |
| POLA2   |
| POLB    |
| POLD1   |
| POLD2   |
| POLD3   |
| POLD4   |
| POLDIP2 |
| POLDIP3 |
| POLE    |
| POLE2   |
| POLE3   |
| POLE4   |
| POLG    |



|         |
|---------|
| POLG2   |
| POLI    |
| POLL    |
| POLM    |
| POLN    |
| POLQ    |
| POLR1B  |
| POLR1C  |
| POLR1D  |
| POLR1E  |
| POLR2A  |
| POLR2B  |
| POLR2C  |
| POLR2D  |
| POLR2E  |
| POLR2F  |
| POLR2G  |
| POLR2H  |
| POLR2I  |
| POLR2J  |
| POLR2J2 |
| POLR2J3 |
| POLR2J4 |
| POLR2K  |
| POLR2L  |
| POLR3A  |
| POLR3B  |
| POLR3C  |
| POLR3D  |
| POLR3E  |
| POLR3F  |
| POLR3G  |
| POLR3GL |
| POLR3H  |
| POLR3K  |
| POLRMT  |
| POLS    |
| POM121C |
| POMC    |
| POMGNT1 |
| POMP    |
| POMT1   |
| POMT2   |
| PON2    |
| POP1    |
| POP4    |
| POP5    |
| POP7    |
| POR     |
| PORCN   |

|          |
|----------|
| POT1     |
| POTEF    |
| POTEG    |
| POU2F1   |
| POU5F1P1 |
| POU6F1   |
| PP14571  |
| PPA1     |
| PPA2     |
| PPAN     |
| PPAP2A   |
| PPAP2B   |
| PPAP2C   |
| PPAPDC1B |
| PPAPDC2  |
| PPARBP   |
| PPARD    |
| PPARG    |
| PPARGC1A |
| PPAT     |
| PPBP     |
| PPCS     |
| PPDPF    |
| PPFIA1   |
| PPFIBP1  |
| PPFIBP2  |
| PPHLN1   |
| PPIA     |
| PPIAL4A  |
| PPIB     |
| PPIC     |
| PPIE     |
| PPIG     |
| PPIH     |
| PPIL1    |
| PPIL2    |
| PPIL3    |
| PPIL5    |
| PPL      |
| PPM1A    |
| PPM1B    |
| PPM1D    |
| PPM1E    |
| PPM1F    |
| PPM1G    |
| PPM1H    |
| PPM1K    |
| PPM1M    |
| PPME1    |
| PPOX     |

|          |
|----------|
| PPP1CA   |
| PPP1CB   |
| PPP1CC   |
| PPP1R10  |
| PPP1R11  |
| PPP1R12A |
| PPP1R12B |
| PPP1R12C |
| PPP1R13B |
| PPP1R13L |
| PPP1R14A |
| PPP1R14B |
| PPP1R15A |
| PPP1R15B |
| PPP1R16A |
| PPP1R1A  |
| PPP1R2   |
| PPP1R3B  |
| PPP1R3C  |
| PPP1R3D  |
| PPP1R3F  |
| PPP1R7   |
| PPP1R8   |
| PPP1R9A  |
| PPP2CA   |
| PPP2CB   |
| PPP2R1A  |
| PPP2R1B  |
| PPP2R2A  |
| PPP2R2B  |
| PPP2R2D  |
| PPP2R3A  |
| PPP2R3B  |
| PPP2R3C  |
| PPP2R4   |
| PPP2R5A  |
| PPP2R5B  |
| PPP2R5C  |
| PPP2R5D  |
| PPP2R5E  |
| PPP3CA   |
| PPP3CB   |
| PPP3CC   |
| PPP3R1   |
| PPP4C    |
| PPP4R1   |
| PPP4R1L  |
| PPP4R4   |
| PPP6C    |
| PPPDE1   |

|          |
|----------|
| PPPDE2   |
| PPRC1    |
| PPT1     |
| PPT2     |
| PPTC7    |
| PPWD1    |
| PQBP1    |
| PQLC1    |
| PQLC2    |
| PQLC3    |
| PRAF2    |
| PRAGMIN  |
| PRAMEF7  |
| PRB3     |
| PRC1     |
| PRCC     |
| PRCP     |
| PRDM1    |
| PRDM10   |
| PRDM4    |
| PRDX1    |
| PRDX2    |
| PRDX3    |
| PRDX4    |
| PRDX5    |
| PRDX6    |
| PREB     |
| PREI3    |
| PRELID1  |
| PREP     |
| PREPL    |
| PREX1    |
| PRIC285  |
| PRICKLE1 |
| PRICKLE2 |
| PRICKLE3 |
| PRICKLE4 |
| PRIM1    |
| PRIM2A   |
| PRINS    |
| PRKAA1   |
| PRKAB1   |
| PRKAB2   |
| PRKACB   |
| PRKAG1   |
| PRKAG2   |
| PRKAR1A  |
| PRKAR2A  |
| PRKCA    |
| PRKCABP  |

|           |
|-----------|
| PRKCD     |
| PRKCDBP   |
| PRKCH     |
| PRKCI     |
| PRKCQ     |
| PRKCSH    |
| PRKCZ     |
| PRKD1     |
| PRKD2     |
| PRKD3     |
| PRKDC     |
| PRKRA     |
| PRKRIP1   |
| PRKRIR    |
| PRKX      |
| PRKY      |
| PRLR      |
| PRMT1     |
| PRMT10    |
| PRMT2     |
| PRMT3     |
| PRMT5     |
| PRMT6     |
| PRMT7     |
| PRNP      |
| PRNPIP    |
| PRO1853   |
| PROCA1    |
| PROCR     |
| PRODH     |
| PROK1     |
| PROM1     |
| PROM2     |
| PROS1     |
| ProSAPiP1 |
| PROSC     |
| PRPF18    |
| PRPF19    |
| PRPF3     |
| PRPF31    |
| PRPF38A   |
| PRPF38B   |
| PRPF4     |
| PRPF40A   |
| PRPF4B    |
| PRPF6     |
| PRPF8     |
| PRPH      |
| PRPS1     |
| PRPS2     |

|         |
|---------|
| PRPSAP1 |
| PRPSAP2 |
| PRR11   |
| PRR13   |
| PRR14   |
| PRR15L  |
| PRR19   |
| PRR3    |
| PRR4    |
| PRR5    |
| PRRC1   |
| PRRG1   |
| PRRG2   |
| PRRG4   |
| PRRT1   |
| PRRT2   |
| PRRT3   |
| PRRX1   |
| PRSS12  |
| PRSS16  |
| PRSS23  |
| PRSS35  |
| PRSS7   |
| PRSS8   |
| PRTFDC1 |
| PRUNE   |
| PSAP    |
| PSAT1   |
| PSCD1   |
| PSCD2   |
| PSCDBP  |
| PSD     |
| PSD3    |
| PSEN1   |
| PSEN2   |
| PSENEEN |
| PSIP1   |
| PSKH1   |
| PSMA1   |
| PSMA2   |
| PSMA3   |
| PSMA4   |
| PSMA5   |
| PSMA6   |
| PSMB1   |
| PSMB10  |
| PSMB2   |
| PSMB3   |
| PSMB4   |
| PSMB5   |

|          |
|----------|
| PSMB6    |
| PSMB7    |
| PSMB8    |
| PSMC1    |
| PSMC2    |
| PSMC3    |
| PSMC3IP  |
| PSMC4    |
| PSMC5    |
| PSMC6    |
| PSMD1    |
| PSMD10   |
| PSMD11   |
| PSMD12   |
| PSMD13   |
| PSMD14   |
| PSMD2    |
| PSMD3    |
| PSMD4    |
| PSMD5    |
| PSMD6    |
| PSMD7    |
| PSMD8    |
| PSMD9    |
| PSME1    |
| PSME2    |
| PSME3    |
| PSME4    |
| PSMF1    |
| PSMG1    |
| PSMG2    |
| PSMG3    |
| PSMG4    |
| PSORS1C1 |
| PSPC1    |
| PSPH     |
| PSRC1    |
| PSTK     |
| PSTPIP2  |
| PTAR1    |
| PTBP1    |
| PTBP2    |
| PTCD1    |
| PTCD2    |
| PTCD3    |
| PTCH1    |
| PTDSS1   |
| PTDSS2   |
| PTEN     |
| PTER     |

|         |
|---------|
| PTGES   |
| PTGES2  |
| PTGES3  |
| PTGFRN  |
| PTGIS   |
| PTGR1   |
| PTGR2   |
| PTGS2   |
| PTH1R   |
| PTK2    |
| PTK2B   |
| PTK7    |
| PTMA    |
| PTMS    |
| PTN     |
| PTOV1   |
| PTP4A1  |
| PTP4A2  |
| PTP4A3  |
| PTPDC1  |
| PTPLA   |
| PTPLAD1 |
| PTPLAD2 |
| PTPLB   |
| PTPMT1  |
| PTPN1   |
| PTPN11  |
| PTPN12  |
| PTPN13  |
| PTPN14  |
| PTPN2   |
| PTPN21  |
| PTPN23  |
| PTPN3   |
| PTPN4   |
| PTPN6   |
| PTPN9   |
| PTPRA   |
| PTPRD   |
| PTPRE   |
| PTPRF   |
| PTPRG   |
| PTPRK   |
| PTPRM   |
| PTPRR   |
| PTPRU   |
| PTRF    |
| PTRH1   |
| PTRH2   |
| PTS     |



|         |
|---------|
| PTTG1   |
| PTTG1IP |
| PTTG3P  |
| PUF60   |
| PUM1    |
| PUM2    |
| PURA    |
| PURB    |
| PURG    |
| PUS1    |
| PUS3    |
| PUS7    |
| PUS7L   |
| PUSL1   |
| PVR     |
| PVRL2   |
| PVRL3   |
| PWP1    |
| PWP2    |
| PWWP2   |
| PWWP2A  |
| PWWP2B  |
| PXDN    |
| PXK     |
| PXMP2   |
| PXMP3   |
| PXN     |
| PYCARD  |
| PYCR1   |
| PYCR2   |
| PYGB    |
| PYGL    |
| PYGO2   |
| PYROXD1 |
| QARS    |
| QDPR    |
| QKI     |
| QPCT    |
| QPRT    |
| QRFPR   |
| QRICH1  |
| QSER1   |
| QSOX1   |
| QSOX2   |
| QTRT1   |
| QTRTD1  |
| R3HCC1  |
| R3HDM1  |
| R3HDM2  |
| RAB10   |

|           |
|-----------|
| RAB11A    |
| RAB11FIP1 |
| RAB11FIP2 |
| RAB11FIP3 |
| RAB11FIP4 |
| RAB11FIP5 |
| RAB12     |
| RAB13     |
| RAB14     |
| RAB15     |
| RAB17     |
| RAB18     |
| RAB1A     |
| RAB1B     |
| RAB20     |
| RAB21     |
| RAB22A    |
| RAB23     |
| RAB24     |
| RAB25     |
| RAB27A    |
| RAB28     |
| RAB2A     |
| RAB2B     |
| RAB30     |
| RAB31     |
| RAB32     |
| RAB33B    |
| RAB34     |
| RAB35     |
| RAB37     |
| RAB38     |
| RAB3B     |
| RAB3GAP1  |
| RAB3GAP2  |
| RAB3IL1   |
| RAB3IP    |
| RAB40B    |
| RAB40C    |
| RAB43     |
| RAB4A     |
| RAB4B     |
| RAB5A     |
| RAB5B     |
| RAB5C     |
| RAB6A     |
| RAB6B     |
| RAB7A     |
| RAB8A     |
| RAB8B     |

|          |
|----------|
| RAB9A    |
| RABAC1   |
| RABEP1   |
| RABEPK   |
| RABGAP1  |
| RABGAP1L |
| RABGEF1  |
| RABGGTA  |
| RABGGTB  |
| RABIF    |
| RABL2A   |
| RABL2B   |
| RABL3    |
| RABL4    |
| RAC1     |
| RAC2     |
| RAC3     |
| RACGAP1  |
| RAD1     |
| RAD17    |
| RAD21    |
| RAD23A   |
| RAD23B   |
| RAD50    |
| RAD51    |
| RAD51AP1 |
| RAD51C   |
| RAD51L1  |
| RAD51L3  |
| RAD52    |
| RAD54B   |
| RAD54L   |
| RAD54L2  |
| RAD9A    |
| RADIL    |
| RAE1     |
| RAF1     |
| RAG1AP1  |
| RAGE     |
| RAI1     |
| RAI14    |
| RALA     |
| RALB     |
| RALBP1   |
| RALGAPA1 |
| RALGAPB  |
| RALGDS   |
| RALGPS1  |
| RALY     |
| RALYL    |

|          |
|----------|
| RAN      |
| RANBP1   |
| RANBP10  |
| RANBP2   |
| RANBP2L1 |
| RANBP3   |
| RANBP6   |
| RANBP9   |
| RANGAP1  |
| RANGRF   |
| RAP1B    |
| RAP1BL   |
| RAP1GAP  |
| RAP1GDS1 |
| RAP2A    |
| RAP2C    |
| RAPGEF1  |
| RAPGEF2  |
| RAPGEF5  |
| RAPGEF6  |
| RAPGEFL1 |
| RAPH1    |
| RARA     |
| RARRES2  |
| RARRES3  |
| RARS     |
| RARS2    |
| RASA1    |
| RASA4P   |
| RASAL2   |
| RASAL3   |
| RASD1    |
| RASIP1   |
| RASL10B  |
| RASL11A  |
| RASL11B  |
| RASL12   |
| RASSF1   |
| RASSF2   |
| RASSF4   |
| RASSF5   |
| RASSF6   |
| RASSF7   |
| RASSF9   |
| RAVER1   |
| RAVER2   |
| RAX2     |
| RAXL1    |
| RB1CC1   |
| RBBP4    |

|         |
|---------|
| RBBP5   |
| RBBP6   |
| RBBP7   |
| RBBP8   |
| RBBP9   |
| RBCK1   |
| RBED1   |
| RBKS    |
| RBL2    |
| RBM10   |
| RBM11   |
| RBM12   |
| RBM12B  |
| RBM14   |
| RBM15   |
| RBM15B  |
| RBM16   |
| RBM17   |
| RBM18   |
| RBM20   |
| RBM22   |
| RBM23   |
| RBM25   |
| RBM26   |
| RBM27   |
| RBM28   |
| RBM3    |
| RBM33   |
| RBM34   |
| RBM35A  |
| RBM38   |
| RBM39   |
| RBM4    |
| RBM41   |
| RBM42   |
| RBM45   |
| RBM47   |
| RBM4B   |
| RBM5    |
| RBM6    |
| RBM7    |
| RBM9    |
| RBMS1   |
| RBMS2   |
| RBMS2P  |
| RBMX    |
| RBMX2   |
| RBMX2FP |
| RBP1    |
| RBP5    |

|        |
|--------|
| RBP7   |
| RBPJ   |
| RBPMS  |
| RBPMS2 |
| RBX1   |
| RC3H2  |
| RCADH5 |
| RCAN1  |
| RCAN2  |
| RCAN3  |
| RCBTB1 |
| RCBTB2 |
| RCC2   |
| RCCD1  |
| RCE1   |
| RCHY1  |
| RCL1   |
| RCN1   |
| RCN2   |
| RCN3   |
| RCOR2  |
| RCOR3  |
| RDBP   |
| RDH10  |
| RDH11  |
| RDH13  |
| RDH14  |
| RDH5   |
| RDM1   |
| RDX    |
| REC8   |
| RECK   |
| RECQL  |
| RECQL4 |
| RECQL5 |
| REEP2  |
| REEP4  |
| REEP5  |
| REEP6  |
| REG1A  |
| RELA   |
| RELB   |
| RELL1  |
| RELN   |
| RENBP  |
| REP15  |
| REPIN1 |
| REPS1  |
| REPS2  |
| RER1   |

|         |
|---------|
| RERE    |
| RERG    |
| RETSAT  |
| REV1    |
| REXO1   |
| REXO2   |
| REXO4   |
| RFC1    |
| RFC2    |
| RFC3    |
| RFC4    |
| RFC5    |
| RFESD   |
| RFFL    |
| RFK     |
| RFNG    |
| RFP     |
| RFPL3S  |
| RFPL4A  |
| RFTN1   |
| RFWD2   |
| RFWD3   |
| RFX1    |
| RFX3    |
| RFX4    |
| RFX5    |
| RFX7    |
| RFXANK  |
| RFXAP   |
| RG9MTD1 |
| RG9MTD2 |
| RG9MTD3 |
| RGL1    |
| RGL2    |
| RGL3    |
| RGMA    |
| RGMB    |
| RGPD4   |
| RGPD8   |
| RGS10   |
| RGS12   |
| RGS16   |
| RGS17   |
| RGS19   |
| RGS2    |
| RGS4    |
| RGS5    |
| RGS7BP  |
| RHBDD1  |
| RHBDD2  |

|         |
|---------|
| RHBDD3  |
| RHBDF1  |
| RHBDF2  |
| RHBDL1  |
| RHBDL2  |
| RHBDL3  |
| RHEB    |
| RHOA    |
| RHOB    |
| RHOBTB1 |
| RHOBTB2 |
| RHOBTB3 |
| RHOC    |
| RHOD    |
| RHOF    |
| RHOG    |
| RHOQ    |
| RHOT1   |
| RHOT2   |
| RHOU    |
| RHPN2   |
| RIC3    |
| RIC8A   |
| RIC8B   |
| RICH2   |
| RICS    |
| RIF1    |
| RILPL1  |
| RILPL2  |
| RIMBP3  |
| RIMKLB  |
| RIMS2   |
| RIMS3   |
| RIMS4   |
| RIN1    |
| RIN2    |
| RING1   |
| RINT1   |
| RIOK1   |
| RIOK2   |
| RIOK3   |
| RIPK1   |
| RIPK2   |
| RIPK4   |
| RIPK5   |
| RIT1    |
| RLF     |
| RLN2    |
| RMI1    |
| RMND1   |



|          |
|----------|
| RMND5A   |
| RMND5B   |
| RN5S9    |
| RN7SK    |
| RN7SL1   |
| RNASE1   |
| RNASE10  |
| RNASE4   |
| RNASEH1  |
| RNASEH2A |
| RNASEH2B |
| RNASEH2C |
| RNASEK   |
| RNASEL   |
| RNASEN   |
| RNASET2  |
| RND2     |
| RND3     |
| RNF10    |
| RNF103   |
| RNF11    |
| RNF111   |
| RNF112   |
| RNF113A  |
| RNF114   |
| RNF115   |
| RNF121   |
| RNF122   |
| RNF123   |
| RNF126   |
| RNF128   |
| RNF13    |
| RNF130   |
| RNF135   |
| RNF138   |
| RNF14    |
| RNF141   |
| RNF144   |
| RNF144A  |
| RNF144B  |
| RNF145   |
| RNF146   |
| RNF149   |
| RNF150   |
| RNF152   |
| RNF157   |
| RNF160   |
| RNF165   |
| RNF166   |
| RNF167   |

|         |
|---------|
| RNF169  |
| RNF170  |
| RNF181  |
| RNF182  |
| RNF185  |
| RNF187  |
| RNF19A  |
| RNF19B  |
| RNF20   |
| RNF213  |
| RNF214  |
| RNF215  |
| RNF216  |
| RNF216L |
| RNF217  |
| RNF219  |
| RNF220  |
| RNF24   |
| RNF25   |
| RNF26   |
| RNF31   |
| RNF34   |
| RNF38   |
| RNF39   |
| RNF4    |
| RNF40   |
| RNF41   |
| RNF43   |
| RNF44   |
| RNF5    |
| RNF5P1  |
| RNF7    |
| RNF8    |
| RNFT1   |
| RNFT2   |
| RNGTT   |
| RNH1    |
| RNMT    |
| RNMTL1  |
| RNPC3   |
| RNPEP   |
| RNPEPL1 |
| RNPS1   |
| RNU105A |
| RNU1-3  |
| RNU1-5  |
| RNU1A3  |
| RNU1F1  |
| RNU1G2  |
| RNU2-1  |

|               |
|---------------|
| RNU4-2        |
| RNU4ATAC      |
| RNU6-1        |
| RNU6-15       |
| RNY1          |
| RNY3          |
| RNY5          |
| ROBLD3        |
| ROBO1         |
| ROBO3         |
| ROCK1         |
| ROCK2         |
| ROD1          |
| ROGDI         |
| ROM1          |
| ROMO1         |
| ROR1          |
| ROR2          |
| RORA          |
| RP11-529I10.4 |
| RP5-1022P6.2  |
| RP9           |
| RPA1          |
| RPA2          |
| RPA3          |
| RPA4          |
| RPAIN         |
| RPAP1         |
| RPAP2         |
| RPAP3         |
| RPE           |
| RPESP         |
| RPF1          |
| RPF2          |
| RPGR          |
| RPIA          |
| RPL10A        |
| RPL11         |
| RPL12         |
| RPL12P6       |
| RPL13         |
| RPL13A        |
| RPL13L        |
| RPL14         |
| RPL14L        |
| RPL15         |
| RPL17         |
| RPL18         |
| RPL18A        |
| RPL19         |

|           |
|-----------|
| RPL21     |
| RPL22     |
| RPL23     |
| RPL23A    |
| RPL23AP13 |
| RPL23AP53 |
| RPL23AP7  |
| RPL24     |
| RPL26     |
| RPL26L1   |
| RPL27     |
| RPL27A    |
| RPL28     |
| RPL29     |
| RPL29P2   |
| RPL3      |
| RPL30     |
| RPL31     |
| RPL31P10  |
| RPL32     |
| RPL34     |
| RPL35     |
| RPL35A    |
| RPL36     |
| RPL36A    |
| RPL36AL   |
| RPL37     |
| RPL37A    |
| RPL38     |
| RPL39     |
| RPL39L    |
| RPL4      |
| RPL41     |
| RPL5      |
| RPL6      |
| RPL7      |
| RPL7A     |
| RPL7L1    |
| RPL8      |
| RPL9      |
| RPLP0     |
| RPLP1     |
| RPLP2     |
| RPN1      |
| RPN2      |
| RPP14     |
| RPP21     |
| RPP25     |
| RPP38     |
| RPP40     |

|          |
|----------|
| RPPH1    |
| RPRC1    |
| RPRD1A   |
| RPRD1B   |
| RPRD2    |
| RPRM     |
| RPS10    |
| RPS10P3  |
| RPS11    |
| RPS12    |
| RPS13    |
| RPS14    |
| RPS15    |
| RPS15A   |
| RPS16    |
| RPS17    |
| RPS18    |
| RPS19    |
| RPS19BP1 |
| RPS2     |
| RPS20    |
| RPS21    |
| RPS23    |
| RPS24    |
| RPS25    |
| RPS26    |
| RPS26L   |
| RPS26P10 |
| RPS26P11 |
| RPS27    |
| RPS27A   |
| RPS27L   |
| RPS28    |
| RPS29    |
| RPS3     |
| RPS3A    |
| RPS4X    |
| RPS4Y1   |
| RPS4Y2   |
| RPS5     |
| RPS6     |
| RPS6KA1  |
| RPS6KA2  |
| RPS6KA3  |
| RPS6KA4  |
| RPS6KA5  |
| RPS6KB1  |
| RPS6KB2  |
| RPS6KC1  |
| RPS6KL1  |

|         |
|---------|
| RPS6P1  |
| RPS7    |
| RPS8    |
| RPS9    |
| RPSA    |
| RPTOR   |
| RPUSD1  |
| RPUSD2  |
| RPUSD3  |
| RPUSD4  |
| RQCD1   |
| RRAGA   |
| RRAGB   |
| RRAGC   |
| RRAGD   |
| RRAS    |
| RRAS2   |
| RRBP1   |
| RREB1   |
| RRM1    |
| RRM2B   |
| RRN3    |
| RRP1    |
| RRP12   |
| RRP15   |
| RRP1B   |
| RRP7A   |
| RRP7B   |
| RRP8    |
| RRP9    |
| RRS1    |
| RSAD1   |
| RSBN1   |
| RSBN1L  |
| RSC1A1  |
| RSF1    |
| RSL1D1  |
| RSL24D1 |
| RSPH3   |
| RSPH9   |
| RSPO2   |
| RSPO3   |
| RSPRY1  |
| RSRC1   |
| RSRC2   |
| RSU1    |
| RTCD1   |
| RTEL1   |
| RTF1    |
| RTKN    |

|         |
|---------|
| RTKN2   |
| RTN2    |
| RTN3    |
| RTN4    |
| RTN4IP1 |
| RTN4R   |
| RTTN    |
| RUFY1   |
| RUFY2   |
| RUFY3   |
| RUNDC1  |
| RUNDC2C |
| RUNX1T1 |
| RUNX2   |
| RUNX3   |
| RUSC1   |
| RUSC2   |
| RUVBL1  |
| RUVBL2  |
| RWDD1   |
| RWDD2A  |
| RWDD2B  |
| RWDD3   |
| RWDD4A  |
| RXRA    |
| RXRB    |
| RXRG    |
| RYBP    |
| RYK     |
| RYR2    |
| RYR3    |
| S100A10 |
| S100A11 |
| S100A13 |
| S100A14 |
| S100A16 |
| S100A4  |
| S100A6  |
| S100A9  |
| S100PBP |
| S1PR3   |
| S1PR4   |
| SAAL1   |
| SAC3D1  |
| SACM1L  |
| SACS    |
| SAE1    |
| SAFB    |
| SAFB2   |
| SALL2   |

|         |
|---------|
| SALL3   |
| SALL4   |
| SAMD1   |
| SAMD11  |
| SAMD4B  |
| SAMD6   |
| SAMD8   |
| SAMM50  |
| SAP130  |
| SAP18   |
| SAP30   |
| SAP30BP |
| SAP30L  |
| SAPS1   |
| SAPS2   |
| SAPS3   |
| SAR1A   |
| SAR1B   |
| SARS    |
| SARS2   |
| SART3   |
| SASH1   |
| SASS6   |
| SAT1    |
| SAT2    |
| SATB1   |
| SATB2   |
| SAV1    |
| SBDS    |
| SBDSP   |
| SBF1    |
| SBF2    |
| SBK1    |
| SBNO2   |
| SC4MOL  |
| SC5DL   |
| SC65    |
| SCAMP1  |
| SCAMP2  |
| SCAMP3  |
| SCAMP4  |
| SCAMP5  |
| SCAND1  |
| SCAND2  |
| SCAND3  |
| SCAP    |
| SCAPER  |
| SCARA3  |
| SCARB1  |
| SCARB2  |



|          |
|----------|
| SCARF2   |
| SCARNA10 |
| SCARNA13 |
| SCARNA16 |
| SCCPDH   |
| SCD      |
| SCD5     |
| SCFD1    |
| SCG5     |
| SCGB3A2  |
| SCHIP1   |
| SCLT1    |
| SCLY     |
| SCMH1    |
| SCML1    |
| SCML2    |
| SCNM1    |
| SCNN1A   |
| SCNN1D   |
| SCO1     |
| SCO2     |
| SCOC     |
| SCPEP1   |
| SCRIB    |
| SCRN1    |
| SCRN2    |
| SCRN3    |
| SCTR     |
| SCYL1    |
| SCYL1BP1 |
| SCYL2    |
| SCYL3    |
| SDAD1    |
| SDC1     |
| SDC2     |
| SDC4     |
| SDCBP    |
| SDCCAG1  |
| SDCCAG10 |
| SDCCAG3  |
| SDF2     |
| SDF2L1   |
| SDF4     |
| SDHA     |
| SDHAF1   |
| SDHAF2   |
| SDHALP1  |
| SDHAP2   |
| SDHAP3   |
| SDHB     |

|           |
|-----------|
| SDHC      |
| SDHD      |
| SDK2      |
| SDSL      |
| SEC11A    |
| SEC11C    |
| SEC13     |
| SEC14L1   |
| SEC16A    |
| SEC22A    |
| SEC22B    |
| SEC22C    |
| SEC23A    |
| SEC23B    |
| SEC23IP   |
| SEC24A    |
| SEC24B    |
| SEC24C    |
| SEC24D    |
| SEC31A    |
| SEC31B    |
| SEC61A1   |
| SEC61A2   |
| SEC61B    |
| SEC61G    |
| SEC62     |
| SEC63     |
| SECISBP2  |
| SECISBP2L |
| SEH1L     |
| SEL1L     |
| SEL1L3    |
| SELENBP1  |
| SELI      |
| SELK      |
| SELM      |
| SELO      |
| SELS      |
| SELT      |
| SELV      |
| SEMA3A    |
| SEMA3C    |
| SEMA3E    |
| SEMA3F    |
| SEMA4B    |
| SEMA4C    |
| SEMA4D    |
| SEMA4F    |
| SEMA4G    |
| SEMA5A    |

|           |
|-----------|
| SEMA5B    |
| SEMA6A    |
| SEMA6B    |
| SEMA6C    |
| SENP2     |
| SENP3     |
| SENP5     |
| SENP6     |
| SENP7     |
| 15. Sep   |
| SEPHS1    |
| SEPHS2    |
| SEPN1     |
| SEPP1     |
| SEPSECS   |
| 10. Sep   |
| 11. Sep   |
| 02. Sep   |
| 03. Sep   |
| 04. Sep   |
| 05. Sep   |
| 06. Sep   |
| 07. Sep   |
| 09. Sep   |
| SEPW1     |
| SEPX1     |
| SERAC1    |
| SERBP1    |
| SERF1A    |
| SERF1B    |
| SERF2     |
| SERGEF    |
| SERHL     |
| SERINC1   |
| SERINC2   |
| SERINC3   |
| SERINC4   |
| SERINC5   |
| SERP1     |
| SERPINA1  |
| SERPINA10 |
| SERPINA5  |
| SERPINB1  |
| SERPINB6  |
| SERPINB9  |
| SERPINE1  |
| SERPINE2  |
| SERPINF1  |
| SERPING1  |
| SERPINH1  |

|          |
|----------|
| SERPINI1 |
| SERTAD1  |
| SERTAD2  |
| SERTAD3  |
| SERTAD4  |
| SESN1    |
| SESN2    |
| SESN3    |
| SESTD1   |
| SET      |
| SETBP1   |
| SETD1A   |
| SETD1B   |
| SETD2    |
| SETD3    |
| SETD4    |
| SETD5    |
| SETD6    |
| SETD8    |
| SETDB1   |
| SETDB2   |
| SETMAR   |
| SETX     |
| SEZ6L2   |
| SF1      |
| SF3A1    |
| SF3A2    |
| SF3A3    |
| SF3B1    |
| SF3B14   |
| SF3B2    |
| SF3B3    |
| SF3B4    |
| SF3B5    |
| SF4      |
| SFMBT1   |
| SFMBT2   |
| SFPQ     |
| SFRP1    |
| SFRP2    |
| SFRS1    |
| SFRS10   |
| SFRS11   |
| SFRS12   |
| SFRS13A  |
| SFRS13B  |
| SFRS14   |
| SFRS15   |
| SFRS16   |
| SFRS17A  |

|          |
|----------|
| SFRS18   |
| SFRS2    |
| SFRS2B   |
| SFRS2IP  |
| SFRS3    |
| SFRS4    |
| SFRS5    |
| SFRS6    |
| SFRS7    |
| SFRS8    |
| SFRS9    |
| SFT2D1   |
| SFT2D2   |
| SFT2D3   |
| SFTPD    |
| SFXN1    |
| SFXN2    |
| SFXN4    |
| SFXN5    |
| SGCB     |
| SGCE     |
| SGK      |
| SGK1     |
| SGK3     |
| SGOL1    |
| SGOL2    |
| SGPL1    |
| SGPP2    |
| SGSH     |
| SGSM1    |
| SGSM2    |
| SGSM3    |
| SGTA     |
| SH2B1    |
| SH2B3    |
| SH2D1A   |
| SH2D3A   |
| SH2D4A   |
| SH2D5    |
| SH3BGRL  |
| SH3BGRL2 |
| SH3BGRL3 |
| SH3BP1   |
| SH3BP4   |
| SH3BP5L  |
| SH3D19   |
| SH3GL1   |
| SH3GL2   |
| SH3GL3   |
| SH3GLB1  |

|          |
|----------|
| SH3GLB2  |
| SH3KBP1  |
| SH3PXD2A |
| SH3PXD2B |
| SH3RF1   |
| SH3RF2   |
| SH3YL1   |
| SHANK3   |
| SHARPIN  |
| SHB      |
| SHBG     |
| SHC1     |
| SHC2     |
| SHCBP1   |
| SHF      |
| SHFM1    |
| SHISA2   |
| SHISA5   |
| SHKBP1   |
| SHMT1    |
| SHMT2    |
| SHOC2    |
| SHPK     |
| SHPRH    |
| SHQ1     |
| SHRM     |
| SHROOM2  |
| SHROOM3  |
| SHROOM4  |
| SIAE     |
| SIAH1    |
| SIAH2    |
| SIDT2    |
| SIGIRR   |
| SIGLEC6  |
| SIGMAR1  |
| SIK2     |
| SIK3     |
| SIKE     |
| SIL1     |
| SILV     |
| SIN3A    |
| SIN3B    |
| SIP1     |
| SIPA1    |
| SIPA1L1  |
| SIPA1L2  |
| SIPA1L3  |
| SIRPA    |
| SIRT1    |

|          |
|----------|
| SIRT2    |
| SIRT4    |
| SIRT5    |
| SIRT7    |
| SIVA     |
| SIVA1    |
| SIX4     |
| SIX5     |
| SKA1     |
| SKA2     |
| SKAP2    |
| SKI      |
| SKIL     |
| SKIV2L   |
| SKIV2L2  |
| SKP1     |
| SKP1A    |
| SKP2     |
| SLAIN1   |
| SLAIN2   |
| SLAMF7   |
| SLBP     |
| SLC10A3  |
| SLC10A7  |
| SLC11A2  |
| SLC12A2  |
| SLC12A4  |
| SLC12A6  |
| SLC12A8  |
| SLC12A9  |
| SLC13A4  |
| SLC15A1  |
| SLC15A3  |
| SLC15A4  |
| SLC16A1  |
| SLC16A10 |
| SLC16A12 |
| SLC16A2  |
| SLC16A3  |
| SLC16A4  |
| SLC16A5  |
| SLC16A9  |
| SLC19A1  |
| SLC19A2  |
| SLC19A3  |
| SLC1A1   |
| SLC1A3   |
| SLC1A5   |
| SLC20A1  |
| SLC20A2  |

|          |
|----------|
| SLC22A15 |
| SLC22A17 |
| SLC22A18 |
| SLC22A23 |
| SLC22A5  |
| SLC23A2  |
| SLC24A1  |
| SLC24A3  |
| SLC24A6  |
| SLC25A1  |
| SLC25A10 |
| SLC25A11 |
| SLC25A12 |
| SLC25A13 |
| SLC25A14 |
| SLC25A15 |
| SLC25A16 |
| SLC25A17 |
| SLC25A18 |
| SLC25A19 |
| SLC25A20 |
| SLC25A22 |
| SLC25A23 |
| SLC25A25 |
| SLC25A26 |
| SLC25A28 |
| SLC25A29 |
| SLC25A3  |
| SLC25A36 |
| SLC25A37 |
| SLC25A38 |
| SLC25A39 |
| SLC25A4  |
| SLC25A40 |
| SLC25A42 |
| SLC25A43 |
| SLC25A44 |
| SLC25A45 |
| SLC25A46 |
| SLC25A5  |
| SLC25A6  |
| SLC26A11 |
| SLC26A2  |
| SLC26A6  |
| SLC27A1  |
| SLC27A2  |
| SLC27A3  |
| SLC27A5  |
| SLC27A6  |
| SLC29A1  |



|          |
|----------|
| SLC29A2  |
| SLC29A3  |
| SLC29A4  |
| SLC2A1   |
| SLC2A10  |
| SLC2A11  |
| SLC2A12  |
| SLC2A14  |
| SLC2A3   |
| SLC2A4RG |
| SLC2A5   |
| SLC2A8   |
| SLC30A1  |
| SLC30A3  |
| SLC30A5  |
| SLC30A7  |
| SLC30A9  |
| SLC31A1  |
| SLC31A2  |
| SLC33A1  |
| SLC35A1  |
| SLC35A2  |
| SLC35A3  |
| SLC35A4  |
| SLC35A5  |
| SLC35B1  |
| SLC35B2  |
| SLC35B3  |
| SLC35B4  |
| SLC35C1  |
| SLC35C2  |
| SLC35D2  |
| SLC35E1  |
| SLC35E3  |
| SLC35F1  |
| SLC35F2  |
| SLC35F3  |
| SLC35F5  |
| SLC36A1  |
| SLC36A4  |
| SLC37A1  |
| SLC37A3  |
| SLC37A4  |
| SLC38A1  |
| SLC38A10 |
| SLC38A2  |
| SLC38A5  |
| SLC38A6  |
| SLC38A7  |
| SLC38A9  |

|          |
|----------|
| SLC39A1  |
| SLC39A10 |
| SLC39A11 |
| SLC39A13 |
| SLC39A14 |
| SLC39A2  |
| SLC39A3  |
| SLC39A4  |
| SLC39A6  |
| SLC39A7  |
| SLC39A8  |
| SLC3A2   |
| SLC40A1  |
| SLC41A1  |
| SLC41A3  |
| SLC43A1  |
| SLC43A2  |
| SLC43A3  |
| SLC44A1  |
| SLC44A2  |
| SLC44A3  |
| SLC44A4  |
| SLC45A3  |
| SLC45A4  |
| SLC46A3  |
| SLC47A1  |
| SLC48A1  |
| SLC4A11  |
| SLC4A1AP |
| SLC4A2   |
| SLC4A5   |
| SLC4A7   |
| SLC4A8   |
| SLC5A10  |
| SLC5A12  |
| SLC5A3   |
| SLC5A6   |
| SLC5A8   |
| SLC5A9   |
| SLC6A10P |
| SLC6A15  |
| SLC6A6   |
| SLC6A8   |
| SLC6A9   |
| SLC7A1   |
| SLC7A11  |
| SLC7A2   |
| SLC7A3   |
| SLC7A5   |
| SLC7A6   |

|          |
|----------|
| SLC7A6OS |
| SLC7A7   |
| SLC7A8   |
| SLC9A1   |
| SLC9A3R1 |
| SLC9A4   |
| SLC9A5   |
| SLC9A6   |
| SLC9A7   |
| SLC9A8   |
| SLCO1A2  |
| SLCO1B1  |
| SLCO2A1  |
| SLCO2B1  |
| SLCO3A1  |
| SLCO4A1  |
| SLCO4C1  |
| SLFN5    |
| SLIT2    |
| SLIT3    |
| SLK      |
| SLMAP    |
| SLMO1    |
| SLTM     |
| SLU7     |
| SMA4     |
| SMA5     |
| SMAD2    |
| SMAD3    |
| SMAD4    |
| SMAD5    |
| SMAD6    |
| SMAD7    |
| SMAGP    |
| SMAP1    |
| SMAP2    |
| SMARCA1  |
| SMARCA2  |
| SMARCA4  |
| SMARCA5  |
| SMARCAD1 |
| SMARCAL1 |
| SMARCB1  |
| SMARCC1  |
| SMARCC2  |
| SMARCD1  |
| SMARCD2  |
| SMARCD3  |
| SMARCE1  |
| SMC2     |

|            |
|------------|
| SMC3       |
| SMC4       |
| SMC6       |
| SMCR5      |
| SMCR7L     |
| SMEK2      |
| SMG1       |
| SMG5       |
| SMG6       |
| SMG7       |
| SMN1       |
| SMN2       |
| SMNDC1     |
| SMO        |
| SMOX       |
| SMPD1      |
| SMPD2      |
| SMPDL3A    |
| SMPDL3B    |
| SMS        |
| SMTN       |
| SMU1       |
| SMUG1      |
| SMURF1     |
| SMYD2      |
| SMYD3      |
| SMYD4      |
| SMYD5      |
| SNAI2      |
| SNAP23     |
| SNAP29     |
| SNAP47     |
| SNAP91     |
| SNAPC1     |
| SNAPC2     |
| SNAPC3     |
| SNAPC4     |
| SNAPC5     |
| SNAPIN     |
| SNCA       |
| SNCAIP     |
| SND1       |
| SNF8       |
| SNHG1      |
| SNHG11     |
| SNHG12     |
| SNHG3-RCC1 |
| SNHG5      |
| SNHG6      |
| SNHG7      |

|          |
|----------|
| SNHG8    |
| SNHG9    |
| SNIP1    |
| SNN      |
| SNORA10  |
| SNORA11D |
| SNORA12  |
| SNORA18  |
| SNORA24  |
| SNORA25  |
| SNORA26  |
| SNORA29  |
| SNORA32  |
| SNORA33  |
| SNORA41  |
| SNORA42  |
| SNORA45  |
| SNORA57  |
| SNORA58  |
| SNORA59A |
| SNORA59B |
| SNORA5C  |
| SNORA6   |
| SNORA61  |
| SNORA62  |
| SNORA64  |
| SNORA67  |
| SNORA68  |
| SNORA70  |
| SNORA70B |
| SNORA70C |
| SNORA73A |
| SNORA73B |
| SNORA76  |
| SNORA7B  |
| SNORA8   |
| SNORA84  |
| SNORD104 |
| SNORD12C |
| SNORD13  |
| SNORD14A |
| SNORD17  |
| SNORD21  |
| SNORD22  |
| SNORD31  |
| SNORD35A |
| SNORD35B |
| SNORD36A |
| SNORD36C |
| SNORD38A |

|          |
|----------|
| SNORD3A  |
| SNORD3C  |
| SNORD3D  |
| SNORD49A |
| SNORD4A  |
| SNORD52  |
| SNORD57  |
| SNORD6   |
| SNORD65  |
| SNORD68  |
| SNORD73A |
| SNORD80  |
| SNORD83B |
| SNRK     |
| SNRNP200 |
| SNRNP25  |
| SNRNP27  |
| SNRNP35  |
| SNRNP40  |
| SNRNP48  |
| SNRNP70  |
| SNRPA    |
| SNRPA1   |
| SNRPB    |
| SNRPB2   |
| SNRPC    |
| SNRPD1   |
| SNRPD2   |
| SNRPD3   |
| SNRPE    |
| SNRPF    |
| SNRPG    |
| SNRPN    |
| SNTA1    |
| SNTB1    |
| SNTB2    |
| SNUPN    |
| SNURF    |
| SNW1     |
| SNX1     |
| SNX10    |
| SNX11    |
| SNX12    |
| SNX13    |
| SNX14    |
| SNX16    |
| SNX17    |
| SNX19    |
| SNX2     |
| SNX21    |

|        |
|--------|
| SNX22  |
| SNX24  |
| SNX25  |
| SNX26  |
| SNX27  |
| SNX29  |
| SNX3   |
| SNX30  |
| SNX33  |
| SNX4   |
| SNX5   |
| SNX6   |
| SNX7   |
| SNX8   |
| SOAT1  |
| SOCS1  |
| SOCS2  |
| SOCS3  |
| SOCS4  |
| SOCS5  |
| SOD1   |
| SOD2   |
| SOHLH2 |
| SOLH   |
| SON    |
| SORBS1 |
| SORBS2 |
| SORBS3 |
| SORCS1 |
| SORD   |
| SORL1  |
| SORT1  |
| SOX11  |
| SOX13  |
| SOX15  |
| SOX17  |
| SOX18  |
| SOX2   |
| SOX21  |
| SOX3   |
| SOX4   |
| SOX7   |
| SOX8   |
| SOX9   |
| SP1    |
| SP110  |
| SP140L |
| SP2    |
| SP3    |
| SP4    |

|          |
|----------|
| SP5      |
| SP6      |
| SP8      |
| SPA17    |
| SPAG1    |
| SPAG16   |
| SPAG5    |
| SPAG7    |
| SPAG9    |
| SPARC    |
| SPAST    |
| SPATA17  |
| SPATA18  |
| SPATA2   |
| SPATA20  |
| SPATA2L  |
| SPATA5L1 |
| SPATA6   |
| SPATA7   |
| SPATC1   |
| SPATS2   |
| SPATS2L  |
| SPC24    |
| SPC25    |
| SPCS1    |
| SPCS2    |
| SPCS3    |
| SPEN     |
| SPG11    |
| SPG20    |
| SPG21    |
| SPG3A    |
| SPG7     |
| SPHAR    |
| SPHK1    |
| SPHK2    |
| SPIN1    |
| SPIN3    |
| SPIN4    |
| SPINK1   |
| SPINK5   |
| SPINT1   |
| SPINT2   |
| SPINT3   |
| SPIRE1   |
| SPIRE2   |
| SPN      |
| SPNS1    |
| SPNS2    |
| SPOCK1   |



|         |
|---------|
| SPOCK2  |
| SPON1   |
| SPOP    |
| SPOPL   |
| SPP1    |
| SPPL2A  |
| SPPL2B  |
| SPPL3   |
| SPR     |
| SPRED1  |
| SPRED2  |
| SPRR1A  |
| SPRY1   |
| SPRY2   |
| SPRY4   |
| SPRYD3  |
| SPRYD4  |
| SPRYD5  |
| SPSB1   |
| SPSB2   |
| SPSB3   |
| SPSB4   |
| SPTAN1  |
| SPTBN1  |
| SPTBN2  |
| SPTLC1  |
| SPTLC2  |
| SPTY2D1 |
| SQLE    |
| SQSTM1  |
| SR140   |
| SRA1    |
| SRBD1   |
| SRC     |
| SRCRB4D |
| SRD5A1  |
| SREBF1  |
| SREBF2  |
| SRF     |
| SRFBP1  |
| SRGAP1  |
| SRGAP2  |
| SRGAP3  |
| SRI     |
| SRM     |
| SRP14   |
| SRP14P1 |
| SRP19   |
| SRP54   |
| SRP68   |

|            |
|------------|
| SRP72      |
| SRP9       |
| SRPK1      |
| SRPK2      |
| SRPR       |
| SRPRB      |
| SRPX       |
| SRRD       |
| SRRM1      |
| SRRM1L     |
| SRRM2      |
| SRXN1      |
| SS18       |
| SS18L1     |
| SS18L2     |
| SSB        |
| SSBP1      |
| SSBP2      |
| SSBP3      |
| SSBP4      |
| SSH2       |
| SSH3       |
| SSNA1      |
| SSPN       |
| SSPO       |
| SSR1       |
| SSR2       |
| SSR3       |
| SSR4       |
| SSRP1      |
| SSSCA1     |
| SSTR2      |
| SSU72      |
| SSX2IP     |
| ST13       |
| ST14       |
| ST3GAL1    |
| ST3GAL2    |
| ST3GAL3    |
| ST3GAL5    |
| ST3GAL6    |
| ST5        |
| ST6GAL1    |
| ST6GALNAC2 |
| ST6GALNAC3 |
| ST6GALNAC4 |
| ST6GALNAC6 |
| ST7        |
| ST7L       |
| ST7OT1     |

|          |
|----------|
| ST8SIA4  |
| STAG1    |
| STAG2    |
| STAG3    |
| STAG3L1  |
| STAG3L2  |
| STAG3L3  |
| STAG3L4  |
| STAM     |
| STAM2    |
| STAMBP   |
| STAMBPL1 |
| STAP2    |
| STAR     |
| STARD10  |
| STARD13  |
| STARD3   |
| STARD3NL |
| STARD5   |
| STARD7   |
| STARD8   |
| STAT1    |
| STAT2    |
| STAT3    |
| STAT4    |
| STAT5A   |
| STAT5B   |
| STAT6    |
| STAU1    |
| STAU2    |
| STBD1    |
| STC1     |
| STC2     |
| STEAP1   |
| STEAP2   |
| STEAP3   |
| STIL     |
| STIM1    |
| STIM2    |
| STIP1    |
| STK10    |
| STK11    |
| STK11IP  |
| STK16    |
| STK17B   |
| STK19    |
| STK24    |
| STK25    |
| STK3     |
| STK35    |

|        |
|--------|
| STK36  |
| STK38  |
| STK38L |
| STK39  |
| STK4   |
| STK40  |
| STMN1  |
| STMN2  |
| STMN3  |
| STOM   |
| STOML1 |
| STOML2 |
| STON1  |
| STOX1  |
| STOX2  |
| STRA13 |
| STRA6  |
| STRADA |
| STRADB |
| STRAP  |
| STRBP  |
| STRC   |
| STRN   |
| STRN3  |
| STRN4  |
| STS-1  |
| STT3A  |
| STT3B  |
| STUB1  |
| STX10  |
| STX12  |
| STX16  |
| STX17  |
| STX1A  |
| STX2   |
| STX3   |
| STX4   |
| STX5   |
| STX6   |
| STX7   |
| STX8   |
| STXBP1 |
| STXBP2 |
| STXBP3 |
| STXBP5 |
| STXBP6 |
| STYK1  |
| STYXL1 |
| SUB1   |
| SUCLA2 |

|          |
|----------|
| SUCLG1   |
| SUCLG2   |
| SUDS3    |
| SUGT1    |
| SULF1    |
| SULF2    |
| SULT1A1  |
| SULT1A2  |
| SULT1A3  |
| SULT1A4  |
| SUMF1    |
| SUMF2    |
| SUMO1    |
| SUMO1P3  |
| SUMO2    |
| SUMO3    |
| SUOX     |
| SUPT16H  |
| SUPT3H   |
| SUPT4H1  |
| SUPT5H   |
| SUPT6H   |
| SUPT7L   |
| SUPV3L1  |
| SURF1    |
| SURF2    |
| SURF4    |
| SURF6    |
| SUSD1    |
| SUSD2    |
| SUSD3    |
| SUSD5    |
| SUV39H1  |
| SUV39H2  |
| SUV420H1 |
| SUV420H2 |
| SUZ12    |
| SUZ12P   |
| SV2A     |
| SVEP1    |
| SVIL     |
| SVOPL    |
| SWAP70   |
| SYAP1    |
| SYCE1L   |
| SYDE1    |
| SYDE2    |
| SYF2     |
| SYMPK    |
| SYN1     |

|         |
|---------|
| SYN2    |
| SYNCRIP |
| SYNE2   |
| SYNGR1  |
| SYNJ1   |
| SYNJ2   |
| SYNJ2BP |
| SYNM    |
| SYNPR   |
| SYPL1   |
| SYS1    |
| SYT1    |
| SYT11   |
| SYT13   |
| SYT15   |
| SYT17   |
| SYT3    |
| SYT6    |
| SYT7    |
| SYTL1   |
| SYTL2   |
| SYVN1   |
| TAC3    |
| TACC1   |
| TACC2   |
| TACC3   |
| TACO1   |
| TACSTD1 |
| TACSTD2 |
| TADA1L  |
| TADA2A  |
| TADA2B  |
| TADA3   |
| TAF1    |
| TAF10   |
| TAF12   |
| TAF15   |
| TAF1A   |
| TAF1B   |
| TAF1C   |
| TAF1D   |
| TAF1L   |
| TAF2    |
| TAF4    |
| TAF5    |
| TAF5L   |
| TAF6    |
| TAF6L   |
| TAF7    |
| TAF9    |

|          |
|----------|
| TAGLN    |
| TAGLN2   |
| TAGLN3   |
| TALDO1   |
| TANC1    |
| TANC2    |
| TANK     |
| TAOK1    |
| TAOK2    |
| TAOK3    |
| TAP1     |
| TAP2     |
| TAPBP    |
| TAPT1    |
| TARBP1   |
| TARBP2   |
| TARDBP   |
| TARS     |
| TARS2    |
| TARSL2   |
| TASP1    |
| TATDN1   |
| TATDN2   |
| TATDN3   |
| TAX1BP1  |
| TAX1BP3  |
| TAZ      |
| TBC1D1   |
| TBC1D10A |
| TBC1D10B |
| TBC1D13  |
| TBC1D14  |
| TBC1D15  |
| TBC1D16  |
| TBC1D17  |
| TBC1D19  |
| TBC1D2   |
| TBC1D20  |
| TBC1D22A |
| TBC1D22B |
| TBC1D23  |
| TBC1D24  |
| TBC1D25  |
| TBC1D2B  |
| TBC1D3B  |
| TBC1D3C  |
| TBC1D3F  |
| TBC1D3G  |
| TBC1D3H  |
| TBC1D3I  |

|         |
|---------|
| TBC1D4  |
| TBC1D5  |
| TBC1D7  |
| TBC1D8  |
| TBC1D9  |
| TBC1D9B |
| TBCA    |
| TBCB    |
| TBCC    |
| TBCCD1  |
| TBCD    |
| TBCE    |
| TBK1    |
| TBKBP1  |
| TBL1X   |
| TBL1XR1 |
| TBL2    |
| TBL3    |
| TBP     |
| TBPL1   |
| TBRG4   |
| TBX1    |
| TBX19   |
| TBX2    |
| TBX21   |
| TBX3    |
| TC2N    |
| TCAM1   |
| TCEA1   |
| TCEA2   |
| TCEA3   |
| TCEAL1  |
| TCEAL2  |
| TCEAL3  |
| TCEAL4  |
| TCEAL7  |
| TCEAL8  |
| TCEB1   |
| TCEB2   |
| TCEB3   |
| TCERG1  |
| TCERG1L |
| TCF12   |
| TCF19   |
| TCF2    |
| TCF20   |
| TCF25   |
| TCF3    |
| TCF4    |
| TCF7L1  |



|          |
|----------|
| TCF7L2   |
| TCFL5    |
| TCHP     |
| TCIRG1   |
| TCL1B    |
| TCL6     |
| TCN2     |
| TCP1     |
| TCP11L1  |
| TCTA     |
| TCTEX1D2 |
| TCTN1    |
| TCTN3    |
| TDG      |
| TDO2     |
| TDP1     |
| TDRD1    |
| TDRD3    |
| TDRD7    |
| TEAD2    |
| TEAD3    |
| TEAD4    |
| TECPR1   |
| TECR     |
| TEF      |
| TEK      |
| TEKT1    |
| TELO2    |
| TERF1    |
| TERF2    |
| TERF2IP  |
| TES      |
| TESK1    |
| TESK2    |
| TESSP5   |
| TET1     |
| TEX10    |
| TEX2     |
| TEX261   |
| TEX264   |
| TEX9     |
| TFAM     |
| TFAMP1   |
| TFAP2A   |
| TFAP2C   |
| TFAP4    |
| TFB1M    |
| TFB2M    |
| TFCP2    |
| TFDP1    |

|          |
|----------|
| TFDP2    |
| TFE3     |
| TFG      |
| TFIP11   |
| TFPI     |
| TFPT     |
| TFRC     |
| TGDS     |
| TGFB111  |
| TGFB3    |
| TGFBI    |
| TGFBR2   |
| TGFBR3   |
| TGFBRAP1 |
| TGIF1    |
| TGIF2    |
| TGM1     |
| TGM2     |
| TGOLN2   |
| TH1L     |
| THADA    |
| THAP1    |
| THAP10   |
| THAP11   |
| THAP6    |
| THAP7    |
| THAP9    |
| THBS3    |
| THBS4    |
| THEM2    |
| THNSL1   |
| THNSL2   |
| THOC1    |
| THOC2    |
| THOC3    |
| THOC4    |
| THOC5    |
| THOC6    |
| THOC7    |
| THOP1    |
| THRA     |
| THRAP3   |
| THRAP5   |
| THSD1P   |
| THSD4    |
| THUMPD1  |
| THUMPD2  |
| THUMPD3  |
| THY1     |
| THYN1    |

|          |
|----------|
| TIA1     |
| TIAF1    |
| TIAL1    |
| TIAM1    |
| TIAM2    |
| TICAM1   |
| TICAM2   |
| TIGA1    |
| TIGD2    |
| TIGD5    |
| TIGD7    |
| TIMELESS |
| TIMM10   |
| TIMM17B  |
| TIMM22   |
| TIMM23   |
| TIMM23B  |
| TIMM44   |
| TIMM8A   |
| TIMM8B   |
| TIMM9    |
| TIMP1    |
| TIMP2    |
| TIMP4    |
| TINF2    |
| TINP1    |
| TIPARP   |
| TIPIN    |
| TIPRL    |
| TIRAP    |
| TJAP1    |
| TJP1     |
| TJP2     |
| TJP3     |
| TK1      |
| TK2      |
| TKT      |
| TLCD1    |
| TLE1     |
| TLE2     |
| TLE3     |
| TLE4     |
| TLK1     |
| TLK2     |
| TLN1     |
| TLN2     |
| TM2D1    |
| TM2D2    |
| TM2D3    |
| TM7SF2   |

|          |
|----------|
| TM7SF3   |
| TM9SF1   |
| TM9SF2   |
| TM9SF3   |
| TM9SF4   |
| TMBIM1   |
| TMBIM4   |
| TMBIM6   |
| TMC4     |
| TMC6     |
| TMC7     |
| TMCC1    |
| TMCO1    |
| TMCO3    |
| TMCO6    |
| TMCO7    |
| TMED1    |
| TMED10   |
| TMED10P  |
| TMED2    |
| TMED3    |
| TMED4    |
| TMED5    |
| TMED7    |
| TMED9    |
| TMEFF1   |
| TMEM1    |
| TMEM100  |
| TMEM101  |
| TMEM104  |
| TMEM106A |
| TMEM106B |
| TMEM106C |
| TMEM107  |
| TMEM108  |
| TMEM109  |
| TMEM11   |
| TMEM111  |
| TMEM115  |
| TMEM116  |
| TMEM118  |
| TMEM120A |
| TMEM123  |
| TMEM125  |
| TMEM126A |
| TMEM126B |
| TMEM127  |
| TMEM128  |
| TMEM129  |
| TMEM131  |

|          |
|----------|
| TMEM132A |
| TMEM132B |
| TMEM133  |
| TMEM134  |
| TMEM135  |
| TMEM136  |
| TMEM137  |
| TMEM138  |
| TMEM141  |
| TMEM143  |
| TMEM144  |
| TMEM147  |
| TMEM149  |
| TMEM14A  |
| TMEM14B  |
| TMEM14C  |
| TMEM14D  |
| TMEM150A |
| TMEM154  |
| TMEM156  |
| TMEM158  |
| TMEM159  |
| TMEM160  |
| TMEM161A |
| TMEM164  |
| TMEM165  |
| TMEM166  |
| TMEM167A |
| TMEM167B |
| TMEM168  |
| TMEM16A  |
| TMEM16B  |
| TMEM17   |
| TMEM170A |
| TMEM170B |
| TMEM175  |
| TMEM177  |
| TMEM178  |
| TMEM179B |
| TMEM18   |
| TMEM180  |
| TMEM181  |
| TMEM183A |
| TMEM183B |
| TMEM184B |
| TMEM184C |
| TMEM185A |
| TMEM185B |
| TMEM186  |
| TMEM187  |

|            |
|------------|
| TMEM188    |
| TMEM189    |
| TMEM189-UB |
| TMEM19     |
| TMEM191A   |
| TMEM191B   |
| TMEM192    |
| TMEM194    |
| TMEM194A   |
| TMEM198    |
| TMEM199    |
| TMEM2      |
| TMEM200A   |
| TMEM203    |
| TMEM205    |
| TMEM206    |
| TMEM207    |
| TMEM208    |
| TMEM209    |
| TMEM214    |
| TMEM216    |
| TMEM218    |
| TMEM219    |
| TMEM22     |
| TMEM222    |
| TMEM231    |
| TMEM25     |
| TMEM27     |
| TMEM30A    |
| TMEM30B    |
| TMEM33     |
| TMEM38A    |
| TMEM38B    |
| TMEM39A    |
| TMEM39B    |
| TMEM4      |
| TMEM41A    |
| TMEM41B    |
| TMEM42     |
| TMEM43     |
| TMEM44     |
| TMEM45A    |
| TMEM47     |
| TMEM48     |
| TMEM49     |
| TMEM5      |
| TMEM50A    |
| TMEM50B    |
| TMEM51     |
| TMEM53     |

|          |
|----------|
| TMEM54   |
| TMEM55A  |
| TMEM55B  |
| TMEM57   |
| TMEM59   |
| TMEM59L  |
| TMEM60   |
| TMEM62   |
| TMEM63A  |
| TMEM63B  |
| TMEM64   |
| TMEM66   |
| TMEM67   |
| TMEM69   |
| TMEM70   |
| TMEM77   |
| TMEM79   |
| TMEM8    |
| TMEM80   |
| TMEM85   |
| TMEM86B  |
| TMEM87A  |
| TMEM87B  |
| TMEM88   |
| TMEM9    |
| TMEM90B  |
| TMEM91   |
| TMEM92   |
| TMEM93   |
| TMEM97   |
| TMEM98   |
| TMEM99   |
| TMEM9B   |
| TMF1     |
| TMLHE    |
| TMOD1    |
| TMOD3    |
| TMPRSS12 |
| TMPRSS2  |
| TMSB10   |
| TMSB15A  |
| TMSB4X   |
| TMSB4Y   |
| TMSL3    |
| TMTC1    |
| TMTC3    |
| TMTC4    |
| TMUB1    |
| TMUB2    |
| TMX1     |

|           |
|-----------|
| TMX3      |
| TMX4      |
| TNC       |
| TNFAIP1   |
| TNFAIP3   |
| TNFAIP8   |
| TNFAIP8L1 |
| TNFRSF10B |
| TNFRSF10C |
| TNFRSF10D |
| TNFRSF12A |
| TNFRSF19  |
| TNFRSF1A  |
| TNFRSF21  |
| TNFRSF25  |
| TNFRSF8   |
| TNFSF13B  |
| TNFSF14   |
| TNFSF15   |
| TNFSF4    |
| TNIP1     |
| TNIP2     |
| TNK2      |
| TNKS      |
| TNKS1BP1  |
| TNNC1     |
| TNNI3     |
| TNNT1     |
| TNNT2     |
| TNPO1     |
| TNPO2     |
| TNPO3     |
| TNRC15    |
| TNRC6A    |
| TNRC6B    |
| TNS1      |
| TNS3      |
| TOB1      |
| TOB2      |
| TOE1      |
| TOLLIP    |
| TOM1      |
| TOM1L1    |
| TOM1L2    |
| TOMM20    |
| TOMM22    |
| TOMM34    |
| TOMM40    |
| TOMM40L   |
| TOMM5     |



|          |
|----------|
| TOMM6    |
| TOMM7    |
| TOMM70A  |
| TOP1     |
| TOP1MT   |
| TOP1P2   |
| TOP2A    |
| TOP2B    |
| TOP3A    |
| TOP3B    |
| TOPBP1   |
| TOPORS   |
| TOR1A    |
| TOR1AIP1 |
| TOR1AIP2 |
| TOR1B    |
| TOR3A    |
| TOX      |
| TOX2     |
| TOX4     |
| TP53     |
| TP53AP1  |
| TP53BP1  |
| TP53BP2  |
| TP53I13  |
| TP53I3   |
| TP53INP1 |
| TP53INP2 |
| TP53RK   |
| TP53TG1  |
| TP63     |
| TPBG     |
| TPCN2    |
| TPD52    |
| TPD52L1  |
| TPD52L2  |
| TPI1     |
| TPK1     |
| TPM1     |
| TPM2     |
| TPM3     |
| TPM4     |
| TPMT     |
| TPP1     |
| TPP2     |
| TPR      |
| TPRG1L   |
| TPRKB    |
| TPST1    |
| TPST2    |

|           |
|-----------|
| TPT1      |
| TPX2      |
| TRA1P2    |
| TRA2A     |
| TRABD     |
| TRADD     |
| TRAF2     |
| TRAF3IP1  |
| TRAF3IP2  |
| TRAF4     |
| TRAF5     |
| TRAF6     |
| TRAF7     |
| TRAFD1    |
| TRAIP     |
| TRAK1     |
| TRAK2     |
| TRAM1     |
| TRAM2     |
| TRAP1     |
| TRAPPC1   |
| TRAPPC2   |
| TRAPPC2L  |
| TRAPPC2P1 |
| TRAPPC3   |
| TRAPPC4   |
| TRAPPC5   |
| TRAPPC6A  |
| TRAPPC6B  |
| TRAPPC9   |
| TRERF1    |
| TRIAP1    |
| TRIB1     |
| TRIB2     |
| TRIB3     |
| TRIL      |
| TRIM11    |
| TRIM13    |
| TRIM2     |
| TRIM21    |
| TRIM22    |
| TRIM23    |
| TRIM24    |
| TRIM25    |
| TRIM26    |
| TRIM27    |
| TRIM28    |
| TRIM3     |
| TRIM32    |
| TRIM33    |

|          |
|----------|
| TRIM35   |
| TRIM36   |
| TRIM37   |
| TRIM38   |
| TRIM39   |
| TRIM4    |
| TRIM41   |
| TRIM44   |
| TRIM45   |
| TRIM5    |
| TRIM52   |
| TRIM55   |
| TRIM56   |
| TRIM6    |
| TRIM65   |
| TRIM66   |
| TRIM68   |
| TRIM71   |
| TRIM78P  |
| TRIM8    |
| TRIM9    |
| TRIML1   |
| TRIML2   |
| TRIO     |
| TRIOBP   |
| TRIP10   |
| TRIP11   |
| TRIP12   |
| TRIP13   |
| TRIP4    |
| TRIP6    |
| TRIT1    |
| TRK1     |
| TRMT1    |
| TRMT11   |
| TRMT112  |
| TRMT12   |
| TRMT2A   |
| TRMT2B   |
| TRMT5    |
| TRMT6    |
| TRMT61A  |
| TRMU     |
| TRNAU1AP |
| TRNP1    |
| TRNT1    |
| TRO      |
| TROAP    |
| TROVE2   |
| TRPC1    |

|         |
|---------|
| TRPC4AP |
| TRPM4   |
| TRPT1   |
| TRPV1   |
| TRRAP   |
| TRUB2   |
| TSC1    |
| TSC2    |
| TSC22D1 |
| TSC22D2 |
| TSC22D3 |
| TSC22D4 |
| TSEN15  |
| TSEN2   |
| TSEN34  |
| TSEN54  |
| TSFM    |
| TSG101  |
| TSGA14  |
| TSHZ1   |
| TSHZ3   |
| TSKU    |
| TSLP    |
| TSN     |
| TSNAX   |
| TSPAN10 |
| TSPAN12 |
| TSPAN13 |
| TSPAN14 |
| TSPAN15 |
| TSPAN17 |
| TSPAN18 |
| TSPAN3  |
| TSPAN31 |
| TSPAN33 |
| TSPAN4  |
| TSPAN5  |
| TSPAN6  |
| TSPAN7  |
| TSPAN9  |
| TSPO    |
| TSPYL1  |
| TSPYL2  |
| TSPYL3  |
| TSPYL5  |
| TSPYL6  |
| TSR1    |
| TSR2    |
| TSSC1   |
| TSSC4   |

|        |
|--------|
| TST    |
| TSTA3  |
| TSTD1  |
| TSTD2  |
| TTC1   |
| TTC12  |
| TTC13  |
| TTC14  |
| TTC15  |
| TTC17  |
| TTC19  |
| TTC23  |
| TTC25  |
| TTC26  |
| TTC27  |
| TTC3   |
| TTC31  |
| TTC32  |
| TTC33  |
| TTC35  |
| TTC37  |
| TTC38  |
| TTC39B |
| TTC39C |
| TTC4   |
| TTC5   |
| TTC7A  |
| TTC7B  |
| TTC8   |
| TTC9C  |
| TTF1   |
| TTF2   |
| TTK    |
| TTL    |
| TTLL1  |
| TTLL12 |
| TTLL3  |
| TTLL4  |
| TTLL5  |
| TTPAL  |
| TTRAP  |
| TTY14  |
| TTY15  |
| TTYH2  |
| TTYH3  |
| TUB    |
| TUBA1A |
| TUBA1B |
| TUBA1C |
| TUBA3D |

|         |
|---------|
| TUBB    |
| TUBB2A  |
| TUBB2B  |
| TUBB2C  |
| TUBB3   |
| TUBB4   |
| TUBB4Q  |
| TUBB6   |
| TUBB8   |
| TUBD1   |
| TUBE1   |
| TUBG1   |
| TUBG2   |
| TUBGCP2 |
| TUBGCP3 |
| TUBGCP4 |
| TUBGCP5 |
| TUBGCP6 |
| TUFM    |
| TUFT1   |
| TUG1    |
| TULP3   |
| TULP4   |
| TUSC1   |
| TUSC2   |
| TUSC3   |
| TUSC4   |
| TUT1    |
| TWF2    |
| TWIST1  |
| TWIST2  |
| TWISTNB |
| TWSG1   |
| TXLNA   |
| TXN     |
| TXN2    |
| TXNDC11 |
| TXNDC12 |
| TXNDC14 |
| TXNDC15 |
| TXNDC16 |
| TXNDC17 |
| TXNDC3  |
| TXNDC5  |
| TXNDC9  |
| TXNIP   |
| TXNL1   |
| TXNL2   |
| TXNL4B  |
| TXNRD1  |

|           |
|-----------|
| TXNRD2    |
| TYK2      |
| TYMS      |
| TYRO3     |
| TYSND1    |
| TYW1      |
| TYW1B     |
| TYW3      |
| U1SNRNPBP |
| U2AF1     |
| U2AF1L2   |
| U2AF1L4   |
| U2AF2     |
| UAP1      |
| UAP1L1    |
| UBA1      |
| UBA2      |
| UBA3      |
| UBA5      |
| UBA52     |
| UBA6      |
| UBAC1     |
| UBAC2     |
| UBAP1     |
| UBAP2     |
| UBAP2L    |
| UBB       |
| UBC       |
| UBE1      |
| UBE1C     |
| UBE1DC1   |
| UBE2A     |
| UBE2C     |
| UBE2CBP   |
| UBE2D2    |
| UBE2D3    |
| UBE2D4    |
| UBE2E1    |
| UBE2E2    |
| UBE2E3    |
| UBE2F     |
| UBE2G1    |
| UBE2G2    |
| UBE2H     |
| UBE2I     |
| UBE2J1    |
| UBE2J2    |
| UBE2K     |
| UBE2L3    |
| UBE2L6    |

|         |
|---------|
| UBE2M   |
| UBE2N   |
| UBE2O   |
| UBE2Q1  |
| UBE2Q2  |
| UBE2R2  |
| UBE2T   |
| UBE2V1  |
| UBE2V2  |
| UBE2W   |
| UBE2Z   |
| UBE3A   |
| UBE3B   |
| UBE3C   |
| UBE4A   |
| UBE4B   |
| UBFD1   |
| UBIAD1  |
| UBL3    |
| UBL4A   |
| UBL5    |
| UBL7    |
| UBLCP1  |
| UBN1    |
| UBN2    |
| UBOX5   |
| UBP1    |
| UBQLN1  |
| UBQLN2  |
| UBQLN4  |
| UBR2    |
| UBR3    |
| UBR4    |
| UBR5    |
| UBR7    |
| UBTD1   |
| UBTD2   |
| UBTF    |
| UBXN1   |
| UBXN11  |
| UBXN2A  |
| UBXN2B  |
| UBXN4   |
| UBXN6   |
| UBXN8   |
| UCA1    |
| UCHL1   |
| UCHL3   |
| UCHL5   |
| UCHL5IP |



|           |
|-----------|
| UCK1      |
| UCK2      |
| UCKL1     |
| UCN       |
| UCP2      |
| UCRC      |
| UEVLD     |
| UFC1      |
| UFM1      |
| UFSP2     |
| UGCG      |
| UGCGL1    |
| UGCGL2    |
| UGDH      |
| UGP2      |
| UGT1A3    |
| UGT2B11   |
| UGT3A1    |
| UGT3A2    |
| UGT8      |
| UHMK1     |
| UHRF1     |
| UHRF1BP1  |
| UHRF1BP1L |
| UHRF2     |
| UIMC1     |
| ULBP1     |
| ULK1      |
| ULK2      |
| ULK3      |
| UNC119    |
| UNC119B   |
| UNC13B    |
| UNC45A    |
| UNC50     |
| UNC5B     |
| UNC84A    |
| UNC84B    |
| UNC93B1   |
| UNG       |
| UNKL      |
| UPF1      |
| UPF2      |
| UPF3A     |
| UPF3B     |
| UPLP      |
| UPP1      |
| UPRT      |
| UQCC      |
| UQCR      |

|         |
|---------|
| UQCRB   |
| UQCRC1  |
| UQCRC2  |
| UQCRFS1 |
| UQCRH   |
| UQCRHL  |
| UQCRQ   |
| URB1    |
| URB2    |
| URG4    |
| URM1    |
| UROD    |
| UROS    |
| USE1    |
| USF1    |
| USF2    |
| USH1G   |
| USMG5   |
| USO1    |
| USP1    |
| USP10   |
| USP11   |
| USP12   |
| USP13   |
| USP14   |
| USP15   |
| USP16   |
| USP18   |
| USP21   |
| USP22   |
| USP24   |
| USP25   |
| USP28   |
| USP3    |
| USP30   |
| USP32   |
| USP33   |
| USP34   |
| USP35   |
| USP36   |
| USP37   |
| USP38   |
| USP39   |
| USP4    |
| USP41   |
| USP42   |
| USP46   |
| USP47   |
| USP48   |
| USP49   |

|        |
|--------|
| USP5   |
| USP54  |
| USP6   |
| USP6NL |
| USP7   |
| USP8   |
| USP9X  |
| USP9Y  |
| USPL1  |
| UST    |
| UTP11L |
| UTP14A |
| UTP14C |
| UTP15  |
| UTP18  |
| UTP23  |
| UTP3   |
| UTP6   |
| UTRN   |
| UTS2   |
| UTX    |
| UTY    |
| UVRAG  |
| UXS1   |
| UXT    |
| VAC14  |
| VAMP1  |
| VAMP2  |
| VAMP3  |
| VAMP4  |
| VAMP5  |
| VAMP7  |
| VAMP8  |
| VANGL2 |
| VARS   |
| VARS2  |
| VASH1  |
| VASH2  |
| VASN   |
| VASP   |
| VAT1   |
| VAT1L  |
| VAV2   |
| VAV3   |
| VBP1   |
| VCAM1  |
| VCAN   |
| VCL    |
| VCP    |
| VCPIP1 |

|          |
|----------|
| VCX      |
| VCX3A    |
| VCX-C    |
| VDAC1    |
| VDAC2    |
| VDAC3    |
| VEGFA    |
| VEGFB    |
| VEGFC    |
| VENTXP1  |
| VEZF1    |
| VEZT     |
| VGf      |
| VGLL4    |
| VHL      |
| VIL2     |
| VIM      |
| VIPR1    |
| VISA     |
| VKORC1   |
| VKORC1L1 |
| VLDLR    |
| VPRBP    |
| VPS11    |
| VPS13A   |
| VPS13C   |
| VPS13D   |
| VPS16    |
| VPS18    |
| VPS24    |
| VPS25    |
| VPS26    |
| VPS26A   |
| VPS26B   |
| VPS28    |
| VPS29    |
| VPS33A   |
| VPS33B   |
| VPS35    |
| VPS36    |
| VPS37A   |
| VPS37B   |
| VPS37C   |
| VPS37D   |
| VPS39    |
| VPS41    |
| VPS45    |
| VPS4A    |
| VPS4B    |
| VPS52    |

|         |
|---------|
| VPS54   |
| VPS72   |
| VPS8    |
| VRK1    |
| VRK2    |
| VRK3    |
| VTA1    |
| VTCN1   |
| VTI1B   |
| VWA1    |
| VWA5A   |
| VWCE    |
| VWF     |
| WAC     |
| WARS    |
| WAS     |
| WASF2   |
| WASF3   |
| WASH1   |
| WASH2P  |
| WASH5P  |
| WASL    |
| WASPIP  |
| WBP1    |
| WBP11   |
| WBP2    |
| WBP4    |
| WBP5    |
| WBSCR16 |
| WBSCR19 |
| WBSCR22 |
| WBSCR27 |
| WDFY1   |
| WDFY2   |
| WDFY3   |
| WDHD1   |
| WDR1    |
| WDR12   |
| WDR13   |
| WDR18   |
| WDR19   |
| WDR20   |
| WDR21A  |
| WDR22   |
| WDR23   |
| WDR24   |
| WDR25   |
| WDR26   |
| WDR27   |
| WDR33   |

|        |
|--------|
| WDR34  |
| WDR35  |
| WDR36  |
| WDR37  |
| WDR4   |
| WDR40A |
| WDR41  |
| WDR42A |
| WDR43  |
| WDR44  |
| WDR45  |
| WDR45L |
| WDR46  |
| WDR48  |
| WDR5   |
| WDR51A |
| WDR51B |
| WDR53  |
| WDR54  |
| WDR55  |
| WDR57  |
| WDR59  |
| WDR5B  |
| WDR6   |
| WDR60  |
| WDR61  |
| WDR62  |
| WDR67  |
| WDR68  |
| WDR7   |
| WDR70  |
| WDR72  |
| WDR73  |
| WDR74  |
| WDR75  |
| WDR77  |
| WDR79  |
| WDR8   |
| WDR81  |
| WDR82  |
| WDR85  |
| WDR86  |
| WDR89  |
| WDR90  |
| WDR91  |
| WDR92  |
| WDSOF1 |
| WDSUB1 |
| WDYHV1 |
| WEE1   |

|         |
|---------|
| WFDC2   |
| WFS1    |
| WHAMM   |
| WHSC1L1 |
| WHSC2   |
| WIBG    |
| WIPF1   |
| WIPI1   |
| WIPI2   |
| WIZ     |
| WNK1    |
| WNK3    |
| WNT3    |
| WNT4    |
| WNT5A   |
| WNT5B   |
| WRB     |
| WRN     |
| WRNIP1  |
| WSB1    |
| WSB2    |
| WSCD1   |
| WTAP    |
| WTIP    |
| WWC1    |
| WWC2    |
| WWC3    |
| WWOX    |
| WWP1    |
| WWP2    |
| XAB2    |
| XAF1    |
| XBP1    |
| XDH     |
| XIAP    |
| XIST    |
| XKR6    |
| XKR8    |
| XPA     |
| XPC     |
| XPNPEP1 |
| XPNPEP2 |
| XPNPEP3 |
| XPO1    |
| XPO4    |
| XPO5    |
| XPO6    |
| XPO7    |
| XPR1    |
| XRCC1   |

|          |
|----------|
| XRCC2    |
| XRCC3    |
| XRCC5    |
| XRCC6    |
| XRCC6BP1 |
| XRN1     |
| XRN2     |
| XYLB     |
| XYLT2    |
| YAF2     |
| YAP1     |
| YARS     |
| YARS2    |
| YBX1     |
| YBX2     |
| YDJC     |
| YEATS2   |
| YEATS4   |
| YES1     |
| YIF1A    |
| YIF1B    |
| YIPF1    |
| YIPF2    |
| YIPF3    |
| YIPF4    |
| YIPF5    |
| YIPF6    |
| YJEFN3   |
| YKT6     |
| YME1L1   |
| YOD1     |
| YPEL1    |
| YPEL2    |
| YPEL3    |
| YPEL5    |
| YRDC     |
| YTHDC1   |
| YTHDC2   |
| YTHDF1   |
| YTHDF2   |
| YTHDF3   |
| YWHAB    |
| YWHAE    |
| YWHAG    |
| YWHAH    |
| YWHAQ    |
| YWHAZ    |
| YY1      |
| YY1AP1   |
| ZADH2    |



|         |
|---------|
| ZAK     |
| ZBBX    |
| ZBED1   |
| ZBED3   |
| ZBED4   |
| ZBED5   |
| ZBTB11  |
| ZBTB17  |
| ZBTB2   |
| ZBTB20  |
| ZBTB22  |
| ZBTB24  |
| ZBTB25  |
| ZBTB3   |
| ZBTB33  |
| ZBTB34  |
| ZBTB39  |
| ZBTB4   |
| ZBTB40  |
| ZBTB42  |
| ZBTB43  |
| ZBTB44  |
| ZBTB45  |
| ZBTB46  |
| ZBTB48  |
| ZBTB5   |
| ZBTB6   |
| ZBTB7A  |
| ZBTB8A  |
| ZBTB8OS |
| ZBTB9   |
| ZC3H10  |
| ZC3H11B |
| ZC3H12A |
| ZC3H12B |
| ZC3H12C |
| ZC3H14  |
| ZC3H15  |
| ZC3H18  |
| ZC3H3   |
| ZC3H4   |
| ZC3H5   |
| ZC3H6   |
| ZC3H7A  |
| ZC3H8   |
| ZC3HAV1 |
| ZC3HC1  |
| ZC4H2   |
| ZCCHC11 |
| ZCCHC14 |

|         |
|---------|
| ZCCHC17 |
| ZCCHC24 |
| ZCCHC3  |
| ZCCHC6  |
| ZCCHC7  |
| ZCCHC8  |
| ZCCHC9  |
| ZCRB1   |
| ZCWPW1  |
| ZDHHC1  |
| ZDHHC11 |
| ZDHHC12 |
| ZDHHC13 |
| ZDHHC16 |
| ZDHHC17 |
| ZDHHC18 |
| ZDHHC2  |
| ZDHHC23 |
| ZDHHC24 |
| ZDHHC3  |
| ZDHHC4  |
| ZDHHC5  |
| ZDHHC6  |
| ZDHHC7  |
| ZDHHC8  |
| ZDHHC8P |
| ZDHHC9  |
| ZER1    |
| ZFAND1  |
| ZFAND2A |
| ZFAND2B |
| ZFAND3  |
| ZFAND5  |
| ZFAND6  |
| ZFC3H1  |
| ZFHX2   |
| ZFHX3   |
| ZFP1    |
| ZFP106  |
| ZFP112  |
| ZFP14   |
| ZFP161  |
| ZFP2    |
| ZFP30   |
| ZFP36   |
| ZFP36L1 |
| ZFP36L2 |
| ZFP37   |
| ZFP42   |
| ZFP64   |

|          |
|----------|
| ZFP82    |
| ZFP90    |
| ZFP91    |
| ZFPL1    |
| ZFPM1    |
| ZFR      |
| ZFX      |
| ZFY      |
| ZFYVE1   |
| ZFYVE16  |
| ZFYVE19  |
| ZFYVE20  |
| ZFYVE21  |
| ZFYVE26  |
| ZFYVE27  |
| ZGPAT    |
| ZHX1     |
| ZHX2     |
| ZHX3     |
| ZIC2     |
| ZIC3     |
| ZIK1     |
| ZKSCAN1  |
| ZKSCAN2  |
| ZKSCAN3  |
| ZKSCAN4  |
| ZKSCAN5  |
| ZMAT2    |
| ZMAT3    |
| ZMAT5    |
| ZMIZ1    |
| ZMIZ2    |
| ZMPSTE24 |
| ZMYM1    |
| ZMYM2    |
| ZMYM3    |
| ZMYM4    |
| ZMYM5    |
| ZMYM6    |
| ZMYND11  |
| ZMYND19  |
| ZMYND8   |
| ZNF10    |
| ZNF101   |
| ZNF114   |
| ZNF12    |
| ZNF124   |
| ZNF131   |
| ZNF133   |
| ZNF134   |

|        |
|--------|
| ZNF135 |
| ZNF136 |
| ZNF137 |
| ZNF138 |
| ZNF14  |
| ZNF140 |
| ZNF142 |
| ZNF143 |
| ZNF146 |
| ZNF148 |
| ZNF154 |
| ZNF155 |
| ZNF16  |
| ZNF160 |
| ZNF165 |
| ZNF167 |
| ZNF17  |
| ZNF174 |
| ZNF175 |
| ZNF177 |
| ZNF18  |
| ZNF181 |
| ZNF182 |
| ZNF185 |
| ZNF187 |
| ZNF189 |
| ZNF193 |
| ZNF195 |
| ZNF197 |
| ZNF2   |
| ZNF20  |
| ZNF200 |
| ZNF202 |
| ZNF204 |
| ZNF205 |
| ZNF207 |
| ZNF211 |
| ZNF212 |
| ZNF213 |
| ZNF215 |
| ZNF217 |
| ZNF219 |
| ZNF22  |
| ZNF222 |
| ZNF223 |
| ZNF224 |
| ZNF225 |
| ZNF226 |
| ZNF227 |
| ZNF23  |

|         |
|---------|
| ZNF232  |
| ZNF234  |
| ZNF235  |
| ZNF239  |
| ZNF24   |
| ZNF248  |
| ZNF25   |
| ZNF250  |
| ZNF251  |
| ZNF252  |
| ZNF254  |
| ZNF256  |
| ZNF259  |
| ZNF26   |
| ZNF260  |
| ZNF263  |
| ZNF264  |
| ZNF266  |
| ZNF268  |
| ZNF271  |
| ZNF273  |
| ZNF274  |
| ZNF275  |
| ZNF277  |
| ZNF28   |
| ZNF280B |
| ZNF280C |
| ZNF280D |
| ZNF281  |
| ZNF282  |
| ZNF283  |
| ZNF285A |
| ZNF286A |
| ZNF286C |
| ZNF295  |
| ZNF296  |
| ZNF3    |
| ZNF30   |
| ZNF300  |
| ZNF302  |
| ZNF304  |
| ZNF317  |
| ZNF318  |
| ZNF319  |
| ZNF32   |
| ZNF320  |
| ZNF322A |
| ZNF322B |
| ZNF323  |
| ZNF324  |

|         |
|---------|
| ZNF324B |
| ZNF326  |
| ZNF329  |
| ZNF330  |
| ZNF331  |
| ZNF333  |
| ZNF334  |
| ZNF335  |
| ZNF337  |
| ZNF33A  |
| ZNF33B  |
| ZNF34   |
| ZNF341  |
| ZNF343  |
| ZNF347  |
| ZNF35   |
| ZNF354A |
| ZNF358  |
| ZNF362  |
| ZNF364  |
| ZNF383  |
| ZNF384  |
| ZNF385A |
| ZNF394  |
| ZNF395  |
| ZNF397  |
| ZNF398  |
| ZNF407  |
| ZNF408  |
| ZNF410  |
| ZNF415  |
| ZNF416  |
| ZNF417  |
| ZNF418  |
| ZNF419  |
| ZNF420  |
| ZNF423  |
| ZNF425  |
| ZNF426  |
| ZNF428  |
| ZNF430  |
| ZNF431  |
| ZNF432  |
| ZNF433  |
| ZNF434  |
| ZNF436  |
| ZNF438  |
| ZNF439  |
| ZNF442  |
| ZNF443  |

|         |
|---------|
| ZNF444  |
| ZNF446  |
| ZNF45   |
| ZNF451  |
| ZNF454  |
| ZNF462  |
| ZNF467  |
| ZNF468  |
| ZNF470  |
| ZNF471  |
| ZNF473  |
| ZNF48   |
| ZNF480  |
| ZNF483  |
| ZNF484  |
| ZNF485  |
| ZNF486  |
| ZNF488  |
| ZNF490  |
| ZNF491  |
| ZNF493  |
| ZNF498  |
| ZNF500  |
| ZNF502  |
| ZNF503  |
| ZNF507  |
| ZNF509  |
| ZNF511  |
| ZNF512  |
| ZNF512B |
| ZNF513  |
| ZNF514  |
| ZNF517  |
| ZNF518A |
| ZNF518B |
| ZNF519  |
| ZNF521  |
| ZNF524  |
| ZNF525  |
| ZNF526  |
| ZNF529  |
| ZNF532  |
| ZNF543  |
| ZNF544  |
| ZNF548  |
| ZNF549  |
| ZNF550  |
| ZNF551  |
| ZNF555  |
| ZNF557  |

|         |
|---------|
| ZNF558  |
| ZNF559  |
| ZNF561  |
| ZNF562  |
| ZNF564  |
| ZNF565  |
| ZNF567  |
| ZNF570  |
| ZNF571  |
| ZNF573  |
| ZNF574  |
| ZNF576  |
| ZNF577  |
| ZNF579  |
| ZNF580  |
| ZNF581  |
| ZNF583  |
| ZNF585A |
| ZNF585B |
| ZNF586  |
| ZNF589  |
| ZNF592  |
| ZNF593  |
| ZNF594  |
| ZNF598  |
| ZNF599  |
| ZNF600  |
| ZNF605  |
| ZNF606  |
| ZNF607  |
| ZNF608  |
| ZNF609  |
| ZNF610  |
| ZNF613  |
| ZNF614  |
| ZNF615  |
| ZNF616  |
| ZNF618  |
| ZNF621  |
| ZNF622  |
| ZNF624  |
| ZNF625  |
| ZNF626  |
| ZNF627  |
| ZNF629  |
| ZNF630  |
| ZNF638  |
| ZNF641  |
| ZNF644  |
| ZNF646  |



|         |
|---------|
| ZNF649  |
| ZNF650  |
| ZNF652  |
| ZNF653  |
| ZNF654  |
| ZNF655  |
| ZNF658  |
| ZNF658B |
| ZNF660  |
| ZNF667  |
| ZNF668  |
| ZNF669  |
| ZNF670  |
| ZNF671  |
| ZNF672  |
| ZNF673  |
| ZNF674  |
| ZNF675  |
| ZNF679  |
| ZNF680  |
| ZNF681  |
| ZNF682  |
| ZNF684  |
| ZNF687  |
| ZNF688  |
| ZNF689  |
| ZNF69   |
| ZNF691  |
| ZNF692  |
| ZNF695  |
| ZNF696  |
| ZNF697  |
| ZNF7    |
| ZNF700  |
| ZNF701  |
| ZNF702P |
| ZNF706  |
| ZNF707  |
| ZNF708  |
| ZNF711  |
| ZNF714  |
| ZNF716  |
| ZNF720  |
| ZNF721  |
| ZNF738  |
| ZNF74   |
| ZNF746  |
| ZNF75A  |
| ZNF75D  |
| ZNF76   |

|         |
|---------|
| ZNF761  |
| ZNF763  |
| ZNF764  |
| ZNF765  |
| ZNF766  |
| ZNF767  |
| ZNF768  |
| ZNF77   |
| ZNF770  |
| ZNF772  |
| ZNF773  |
| ZNF775  |
| ZNF776  |
| ZNF777  |
| ZNF783  |
| ZNF784  |
| ZNF785  |
| ZNF786  |
| ZNF787  |
| ZNF788  |
| ZNF789  |
| ZNF79   |
| ZNF791  |
| ZNF792  |
| ZNF800  |
| ZNF805  |
| ZNF813  |
| ZNF815  |
| ZNF816A |
| ZNF821  |
| ZNF823  |
| ZNF827  |
| ZNF828  |
| ZNF83   |
| ZNF830  |
| ZNF837  |
| ZNF839  |
| ZNF84   |
| ZNF841  |
| ZNF845  |
| ZNF85   |
| ZNF860  |
| ZNF91   |
| ZNF93   |
| ZNFX1   |
| ZNHIT1  |
| ZNHIT2  |
| ZNHIT3  |
| ZNHIT6  |
| ZNRD1   |

|           |
|-----------|
| ZNRF3     |
| ZP3       |
| ZRANB1    |
| ZRANB2    |
| ZRANB3    |
| ZRSR2     |
| ZSCAN12   |
| ZSCAN12L1 |
| ZSCAN16   |
| ZSCAN18   |
| ZSCAN2    |
| ZSCAN21   |
| ZSCAN29   |
| ZSCAN5A   |
| ZSWIM1    |
| ZSWIM3    |
| ZSWIM4    |
| ZSWIM5    |
| ZSWIM6    |
| ZSWIM7    |
| ZUFSP     |
| ZW10      |
| ZWILCH    |
| ZWINT     |
| ZXDC      |
| ZYG11B    |
| ZYX       |
| ZZEF1     |
| ZZZ3      |

Supplementary Table S7: List of genes used for heatmaps in Supplementary Figure S3 and regulatory network analysis via oPOSSUM data base.

|         |          |
|---------|----------|
| POU5F1  | iPSC/ESC |
| SOX2    | DE       |
| NANOG   | HE       |
| HNF1A   | HLC      |
| HNF1B   |          |
| LGR5    |          |
| ONECUT1 |          |
| ONECUT2 |          |
| ALB     |          |
| AFP     |          |
| TTR     |          |
| SOX17   |          |
| SALL4   |          |
| GPBAR1  |          |
| DLK1    |          |
| DLK2    |          |
| KIT     |          |
| CD34    |          |
| THY1    |          |
| CYP3A7  |          |
| CYP1A1  |          |
| TRIM15  |          |
| WNT3A   |          |
| SOX9    |          |
| NOTCH1  |          |
| NOTCH2  |          |
| NOTCH3  |          |
| JAG1    |          |
| JAG2    |          |
| FOXD4   |          |
| FOXJ1   |          |
| PROX1   |          |
| CXCR4   |          |
| GATA4   |          |

Supplementary Table S8: Regulatory network analysis via oPOSSUM data base.

| TF           | JASPAR ID | Class                   | Target gene hits | Target TFBS hits | Z-score | Fisher score | p_fisher   |
|--------------|-----------|-------------------------|------------------|------------------|---------|--------------|------------|
| Myc          | MA0147.1  | Zipper-Type             | 20               | 47               | 12,538  | 10,045       | 4,3402E-05 |
| HNF1A        | MA0046.1  | Helix-Turn-Helix        | 8                | 12               | 11,142  | 6,095        | 0,00225411 |
| SP1          | MA0079.2  | Zinc-coordinating       | 26               | 166              | 10,879  | 8,689        | 0,00016843 |
| MZF1_5-13    | MA0057.1  | Zinc-coordinating       | 28               | 144              | 10,634  | 11,781       | 7,6485E-06 |
| HNF4A        | MA0114.1  | Zinc-coordinating       | 18               | 25               | 10,585  | 13,199       | 1,8525E-06 |
| Klf4         | MA0039.2  | Zinc-coordinating       | 28               | 176              | 10,414  | 9,748        | 5,8411E-05 |
| Mycn         | MA0104.2  | Zipper-Type             | 21               | 45               | 9,937   | 10,917       | 1,8147E-05 |
| MZF1_1-4     | MA0056.1  | Zinc-coordinating       | 28               | 341              | 9,472   | 5,875        | 0,00280879 |
| INSM1        | MA0155.1  | Zinc-coordinating       | 19               | 38               | 9,017   | 9,948        | 4,7823E-05 |
| ESR2         | MA0258.1  | Zinc-coordinating       | 6                | 7                | 8,72    | 4,996        | 0,00676495 |
| Tcfcp2l1     | MA0145.1  | Other                   | 24               | 58               | 8,586   | 11,598       | 9,1844E-06 |
| HIF1A::ARNT  | MA0259.1  | Zipper-Type             | 24               | 79               | 7,882   | 9,734        | 5,9235E-05 |
| NR2F1        | MA0017.1  | Zinc-coordinating       | 9                | 11               | 7,151   | 5,998        | 0,00248371 |
| EBF1         | MA0154.1  | Zipper-Type             | 21               | 67               | 6,987   | 6,61         | 0,00134683 |
| Ddit3::Cebpa | MA0019.1  | Zipper-Type             | 10               | 19               | 6,879   | 4,026        | 0,01784557 |
| FOXF2        | MA0030.1  | Winged Helix-Turn-Helix | 5                | 13               | 6,758   | 1,371        | 0,25385298 |
| Myf          | MA0055.1  | Zipper-Type             | 15               | 46               | 6,493   | 2,883        | 0,05596661 |
| CEBPA        | MA0102.2  | Zipper-Type             | 18               | 82               | 6,326   | 3,134        | 0,04354328 |
| Zfx          | MA0146.1  | Zinc-coordinating       | 25               | 62               | 6,141   | 12,815       | 2,7197E-06 |
| REL          | MA0101.1  | Ig-fold                 | 18               | 51               | 6,11    | 4,805        | 0,0081887  |
| ZNF354C      | MA0130.1  | Zinc-coordinating       | 32               | 305              | 6,079   | 11,03        | 1,6208E-05 |
| Gata1        | MA0035.2  | Zinc-coordinating       | 27               | 104              | 5,945   | 10,923       | 1,8039E-05 |
| Evi1         | MA0029.1  | Zinc-coordinating       | 5                | 5                | 5,373   | 4,562        | 0,01044116 |
| Arnt::Ahr    | MA0006.1  | Zipper-Type             | 26               | 111              | 5,35    | 8,846        | 0,00014396 |
| Nobox        | MA0125.1  | Helix-Turn-Helix        | 20               | 106              | 5,301   | 4,043        | 0,01754476 |
| ZEB1         | MA0103.1  | Zinc-coordinating       | 28               | 253              | 5,154   | 5,227        | 0,00536961 |
| RELA         | MA0107.1  | Ig-fold                 | 14               | 25               | 5,017   | 5,551        | 0,00388357 |
| Pou5f1       | MA0142.1  | Helix-Turn-Helix        | 7                | 9                | 4,877   | 4,269        | 0,01399577 |
| PPARG::RXRA  | MA0065.2  | Zinc-coordinating       | 11               | 19               | 4,841   | 3,983        | 0,01862967 |

|             |          |                         |    |     |       |        |            |
|-------------|----------|-------------------------|----|-----|-------|--------|------------|
| Myb         | MA0100.1 | Helix-Turn-Helix        | 27 | 93  | 4,688 | 10,595 | 2,5041E-05 |
| REST        | MA0138.2 | Zinc-coordinating       | 1  | 1   | 4,664 | 1,653  | 0,19147462 |
| Sox2        | MA0143.1 | Other Alpha-Helix       | 6  | 7   | 4,575 | 4,042  | 0,01756231 |
| NFIL3       | MA0025.1 | Zipper-Type             | 12 | 24  | 4,522 | 4,82   | 0,00806679 |
| NF-kappaB   | MA0061.1 | Ig-fold                 | 15 | 33  | 4,513 | 4,554  | 0,01052502 |
| Zfp423      | MA0116.1 | Zinc-coordinating       | 11 | 18  | 4,352 | 4,124  | 0,01617967 |
| NFE2L2      | MA0150.1 | Zipper-Type             | 9  | 15  | 4,308 | 3,352  | 0,03501426 |
| Gfi         | MA0038.1 | Zinc-coordinating       | 20 | 90  | 4,209 | 3,539  | 0,02904235 |
| NFKB1       | MA0105.1 | Ig-fold                 | 9  | 13  | 4,01  | 4,455  | 0,01162032 |
| HLF         | MA0043.1 | Zipper-Type             | 10 | 16  | 3,855 | 4,192  | 0,01511602 |
| Sox17       | MA0078.1 | Other Alpha-Helix       | 25 | 89  | 3,733 | 8,542  | 0,0001951  |
| Arnt        | MA0004.1 | Zipper-Type             | 16 | 29  | 3,712 | 6,66   | 0,00128115 |
| IRF2        | MA0051.1 | Winged Helix-Turn-Helix | 2  | 2   | 3,403 | 2,04   | 0,13002871 |
| SOX9        | MA0077.1 | Other Alpha-Helix       | 20 | 56  | 2,997 | 6,505  | 0,00149594 |
| RORA_1      | MA0071.1 | Zinc-coordinating       | 12 | 26  | 2,962 | 2,836  | 0,05865984 |
| FOX11       | MA0042.1 | Winged Helix-Turn-Helix | 20 | 63  | 2,961 | 6,583  | 0,00138369 |
| TAL1::TCF3  | MA0091.1 | Zipper-Type             | 10 | 20  | 2,823 | 2,522  | 0,08029885 |
| NFYA        | MA0060.1 | Other Alpha-Helix       | 9  | 18  | 2,692 | 1,966  | 0,1400158  |
| HNF1B       | MA0153.1 | Helix-Turn-Helix        | 8  | 10  | 2,669 | 4,384  | 0,01247536 |
| Tal1::Gata1 | MA0140.1 | Zipper-Type             | 8  | 15  | 2,596 | 2,057  | 0,12783691 |
| E2F1        | MA0024.1 | Winged Helix-Turn-Helix | 17 | 31  | 2,475 | 6,452  | 0,00157736 |
| SRY         | MA0084.1 | Other Alpha-Helix       | 24 | 125 | 2,317 | 6,405  | 0,00165327 |
| Spz1        | MA0111.1 | Other                   | 15 | 19  | 2,287 | 7,699  | 0,00045328 |
| SPIB        | MA0081.1 | Winged Helix-Turn-Helix | 28 | 230 | 2,286 | 5,703  | 0,00333594 |
| NHLH1       | MA0048.1 | Zipper-Type             | 11 | 16  | 2,276 | 4,195  | 0,01507074 |
| FOXA1       | MA0148.1 | Winged Helix-Turn-Helix | 19 | 78  | 1,7   | 3,562  | 0,028382   |
| FOXD1       | MA0031.1 | Winged Helix-Turn-Helix | 22 | 78  | 1,661 | 6,626  | 0,00132545 |
| FOXO3       | MA0157.1 | Winged Helix-Turn-Helix | 20 | 86  | 1,643 | 4,021  | 0,01793502 |
| Nr2e3       | MA0164.1 | Zinc-coordinating       | 8  | 17  | 1,57  | 1,783  | 0,16813299 |
| NR4A2       | MA0160.1 | Zinc-coordinating       | 24 | 77  | 1,512 | 6,893  | 0,00101486 |
| Nkx2-5      | MA0063.1 | Helix-Turn-Helix        | 26 | 232 | 1,494 | 5,331  | 0,00483923 |
| Egr1        | MA0162.1 | Zinc-coordinating       | 14 | 23  | 1,489 | 4,95   | 0,00708341 |
| Nkx3-2      | MA0122.1 | Helix-Turn-Helix        | 28 | 117 | 1,447 | 9,562  | 7,0352E-05 |

|              |          |                         |    |     |        |       |            |
|--------------|----------|-------------------------|----|-----|--------|-------|------------|
| TBP          | MA0108.2 | Beta-sheet              | 15 | 42  | 1,362  | 3,121 | 0,04411303 |
| Foxa2        | MA0047.2 | Winged Helix-Turn-Helix | 16 | 53  | 1,313  | 3,064 | 0,04670052 |
| MIZF         | MA0131.1 | Zinc-coordinating       | 4  | 5   | 1,298  | 1,819 | 0,16218786 |
| Prrx2        | MA0075.1 | Helix-Turn-Helix        | 25 | 146 | 1,176  | 7,031 | 0,00088405 |
| Pax6         | MA0069.1 | Helix-Turn-Helix        | 2  | 2   | 1,093  | 1,531 | 0,21631924 |
| ELK1         | MA0028.1 | Winged Helix-Turn-Helix | 23 | 79  | 0,821  | 5,141 | 0,00585183 |
| NR3C1        | MA0113.1 | Zinc-coordinating       | 4  | 4   | 0,717  | 2,18  | 0,11304153 |
| SPI1         | MA0080.2 | Winged Helix-Turn-Helix | 26 | 122 | 0,676  | 6,098 | 0,00224736 |
| PLAG1        | MA0163.1 | Zinc-coordinating       | 4  | 4   | 0,666  | 2,147 | 0,11683413 |
| CREB1        | MA0018.2 | Zipper-Type             | 15 | 27  | 0,6    | 3,876 | 0,02073359 |
| TEAD1        | MA0090.1 | Helix-Turn-Helix        | 7  | 11  | 0,497  | 1,844 | 0,15818343 |
| RXR::RAR_DR1 | MA0159.1 | Zinc-coordinating       | 2  | 2   | 0,393  | 1,314 | 0,26874293 |
| NKX3-1       | MA0124.1 | Helix-Turn-Helix        | 19 | 78  | 0,176  | 4,268 | 0,01400977 |
| RORA_2       | MA0072.1 | Zinc-coordinating       | 6  | 6   | 0,141  | 2,875 | 0,05641614 |
| USF1         | MA0093.1 | Zipper-Type             | 18 | 30  | 0,059  | 6,359 | 0,0017311  |
| MYC::MAX     | MA0059.1 | Zipper-Type             | 6  | 6   | -0,237 | 2,546 | 0,07839462 |
| Sox5         | MA0087.1 | Other Alpha-Helix       | 21 | 80  | -0,403 | 5,7   | 0,00334597 |
| Foxq1        | MA0040.1 | Winged Helix-Turn-Helix | 12 | 24  | -0,444 | 3,571 | 0,02812771 |
| RUNX1        | MA0002.2 | Ig-fold                 | 25 | 69  | -0,677 | 8,801 | 0,00015058 |
| Foxd3        | MA0041.1 | Winged Helix-Turn-Helix | 18 | 54  | -0,843 | 5,052 | 0,00639653 |
| ELK4         | MA0076.1 | Winged Helix-Turn-Helix | 9  | 13  | -0,907 | 1,993 | 0,13628595 |
| SRF          | MA0083.1 | Other Alpha-Helix       | 1  | 1   | -0,928 | 0,683 | 0,50509942 |
| znf143       | MA0088.1 | Zinc-coordinating       | 2  | 2   | -1,005 | 1,013 | 0,36312796 |
| T            | MA0009.1 | Beta-Hairpin-Ribbon     | 2  | 2   | -1,01  | 0,985 | 0,37343923 |
| HOXA5        | MA0158.1 | Helix-Turn-Helix        | 27 | 232 | -1,09  | 5,2   | 0,00551656 |
| Stat3        | MA0144.1 | Ig-fold                 | 15 | 28  | -1,18  | 3,413 | 0,03294223 |
| Hand1::Tcf2  | MA0092.1 | Zipper-Type             | 25 | 62  | -1,291 | 9,575 | 6,9443E-05 |
| TLX1::NFIC   | MA0119.1 | Helix-Turn-Helix::Other | 1  | 1   | -1,453 | 0,587 | 0,55599276 |
| TP53         | MA0106.1 | Zinc-coordinating       | 0  | 0   | -1,512 | 0     | 1          |
| Pdx1         | MA0132.1 | Helix-Turn-Helix        | 25 | 152 | -1,555 | 6,374 | 0,00170532 |
| PPARG        | MA0066.1 | Zinc-coordinating       | 0  | 0   | -1,589 | 0     | 1          |
| STAT1        | MA0137.2 | Ig-fold                 | 7  | 12  | -1,619 | 1,163 | 0,31254713 |
| Esrrb        | MA0141.1 | Zinc-coordinating       | 17 | 29  | -1,681 | 4,935 | 0,00719046 |

|             |          |                         |    |     |        |       |            |
|-------------|----------|-------------------------|----|-----|--------|-------|------------|
| NR1H2::RXRA | MA0115.1 | Zinc-coordinating       | 0  | 0   | -1,797 | 0     | 1          |
| PBX1        | MA0070.1 | Helix-Turn-Helix        | 4  | 6   | -1,826 | 0,949 | 0,38712796 |
| ARID3A      | MA0151.1 | Helix-Turn-Helix        | 24 | 175 | -1,979 | 4,683 | 0,00925122 |
| RREB1       | MA0073.1 | Zinc-coordinating       | 2  | 2   | -2,111 | 0,867 | 0,42021029 |
| NFATC2      | MA0152.1 | Ig-fold                 | 25 | 107 | -2,213 | 6,561 | 0,00141447 |
| Pax4        | MA0068.1 | Helix-Turn-Helix        | 0  | 0   | -2,345 | 0     | 1          |
| EWSR1-FLI1  | MA0149.1 | Winged Helix-Turn-Helix | 0  | 0   | -2,592 | 0     | 1          |
| GABPA       | MA0062.2 | Winged Helix-Turn-Helix | 17 | 27  | -2,682 | 4,453 | 0,01164358 |
| FEV         | MA0156.1 | Winged Helix-Turn-Helix | 22 | 90  | -2,977 | 3,047 | 0,04750121 |
| ESR1        | MA0112.2 | Zinc-coordinating       | 0  | 0   | -3,111 | 0     | 1          |
| RXRA::VDR   | MA0074.1 | Zinc-coordinating       | 0  | 0   | -3,126 | 0     | 1          |
| AP1         | MA0099.2 | Zipper-Type             | 24 | 119 | -3,19  | 3,965 | 0,01896804 |
| Pax5        | MA0014.1 | Helix-Turn-Helix        | 1  | 1   | -3,44  | 0,367 | 0,69280965 |
| IRF1        | MA0050.1 | Winged Helix-Turn-Helix | 6  | 10  | -3,795 | 0,821 | 0,43999144 |
| Ar          | MA0007.1 | Zinc-coordinating       | 0  | 0   | -4,058 | 0     | 1          |
| ELF5        | MA0136.1 | Winged Helix-Turn-Helix | 24 | 128 | -4,107 | 3,331 | 0,03575733 |
| CTCF        | MA0139.1 | Zinc-coordinating       | 3  | 3   | -4,519 | 0,625 | 0,53526143 |
| YY1         | MA0095.1 | Zinc-coordinating       | 28 | 167 | -4,655 | 6,467 | 0,00155388 |
| Lhx3        | MA0135.1 | Helix-Turn-Helix        | 8  | 9   | -4,832 | 2,43  | 0,08803683 |
| MAX         | MA0058.1 | Zipper-Type             | 11 | 14  | -4,86  | 2,027 | 0,13173012 |
| MEF2A       | MA0052.1 | Other Alpha-Helix       | 7  | 11  | -5,293 | 0,937 | 0,39180148 |



Supplementary Table S9: Gene lists of a venn diagram.

|              |                         | hlc_vs_ipsc<br>AND                            |             | fetal_liver_<br>vs_ipsc<br>AND    |                                               | hlc_vs_ipsc<br>AND<br>fetal_liver_<br>vs_ipsc<br>AND |
|--------------|-------------------------|-----------------------------------------------|-------------|-----------------------------------|-----------------------------------------------|------------------------------------------------------|
| hlc_vs_ipsc  | fetal_liver_<br>vs_ipsc | hlc_vs_ipsc<br>AND<br>fetal_liver_<br>vs_ipsc | phh_vs_ipsc | hlc_vs_ipsc<br>AND<br>phh_vs_ipsc | phh_vs_ipsc<br>AND<br>fetal_liver_<br>vs_ipsc | phh_vs_ipsc<br>AND<br>fetal_liver_<br>vs_ipsc<br>AND |
| AAK1         | ABCC1                   | AACSL                                         | A1BG        | A2LD1                             | A2M                                           | A1CF                                                 |
| ABCA4        | ABCC13                  | ABCE1                                         | A4GALT      | AAAS                              | A2ML1                                         | AADAC                                                |
| ABCG4        | ABHD11                  | ABCG2                                         | AARS2       | AACS                              | AAA1                                          | AADAACL1                                             |
| ACER3        | ABI3BP                  | ABLIM1                                        | AATK        | AADAT                             | ABAT                                          | AAMP                                                 |
| ACSBG1       | ACO2                    | ACLY                                          | ABCA10      | AARSD1                            | ABCA1                                         | AARS                                                 |
| ACTA2        | ACPT                    | ACOT8                                         | ABCA11      | ABCA2                             | ABCA6                                         | AASDH                                                |
| ADAMTS18     | ACSL6                   | ACP6                                          | ABCB7       | ABCC10                            | ABCA9                                         | AASS                                                 |
| ADAMTS20     | ACSS1                   | ACPP                                          | ABCB9       | ABCF3                             | ABCB1                                         | ABCA3                                                |
| ADAMTS6      | ACVRL1                  | ACTR3B                                        | ABCC9       | ABHD12                            | ABCB10                                        | ABCA5                                                |
| ADAMTSL5     | ADAM12                  | ADAMTS8                                       | ABHD2       | ABHD4                             | ABCB11                                        | ABCA7                                                |
| ADARB1       | ADCY1                   | ADCK4                                         | ABI1        | ABHD8                             | ABCB4                                         | ABCA8                                                |
| ADH5         | ADCY4                   | ADD1                                          | ACAA2       | ACAD8                             | ABCB6                                         | ABCC3                                                |
| ADPGK        | ADCY7                   | ADIPOR1                                       | ACACA       | ACAP1                             | ABCC11                                        | ABCC5                                                |
| AFAP1L1      | ADRA2C                  | ADIPOR2                                       | ACBD4       | ACAP2                             | ABCC2                                         | ABCD1                                                |
| AFF2         | AFF3                    | ADNP2                                         | ACD         | ACBD3                             | ABCC4                                         | ABCF2                                                |
| AGFG1        | AFF4                    | ADRM1                                         | ACSM1       | ACOT11                            | ABCC6                                         | ABCG1                                                |
| AHDC1        | ALAS2                   | AGA                                           | ACTR2       | ACP1                              | ABCC6P1                                       | ABHD1                                                |
| AHI1         | ALDH16A1                | AGPAT1                                        | ACTR8       | ACPL2                             | ABCC6P2                                       | ABHD12B                                              |
| AHSA1        | ALG11                   | AHCYL1                                        | ADAM15      | ACRBP                             | ABCD3                                         | ABHD15                                               |
| AIM2         | ALKBH4                  | AIM1L                                         | ADAMTS2     | ACTG2                             | ABCG5                                         | ABHD7                                                |
| AK2P2        | ALMS1                   | AKIRIN2                                       | ADAMTS7     | ACTN4                             | ABCG8                                         | ABHD9                                                |
| AKAP2        | AMN                     | ALDH7A1                                       | ADAT1       | ACTR1B                            | ABHD14A                                       | ABI2                                                 |
| ALDH3B2      | ANAPC2                  | ALG1L                                         | ADAT3       | ACYP1                             | ABHD14B                                       | ABI3                                                 |
| ALG10        | ANKAR                   | ALOX12                                        | ADCY9       | ADAL                              | ABHD3                                         | ABL1                                                 |
| ALK          | ANKLE1                  | AMHR2                                         | ADCYAP1R1   | ADAMTSL4                          | ABHD5                                         | ABTB2                                                |
| ALKBH2       | ANKRD41                 | ANKRD10                                       | ADH1B       | ADAT2                             | ABHD6                                         | ACAA1                                                |
| ALOX15       | ANO8                    | ANKRD13D                                      | ADORA2A     | ADCK5                             | ABLIM3                                        | ACACB                                                |
| AMBRA1       | ANXA5                   | ANKRD16                                       | ADPRH       | ADK                               | ABR                                           | ACADL                                                |
| AMH          | AP3D1                   | ANKRD20B                                      | ADPRHL2     | ADORA1                            | ABT1                                          | ACADM                                                |
| ANAPC7       | APEX2                   | ANKRD38                                       | ADRA2A      | ADRA1A                            | ABTB1                                         | ACADS                                                |
| ANGPT2       | APOBEC2                 | ANKRD9                                        | ADRA2B      | AGAP8                             | ACAD11                                        | ACADVL                                               |
| ANKHD1-EIF4I | ARFRP1                  | AP1S1                                         | AES         | AGL                               | ACAD9                                         | ACAT1                                                |
| ANKLE2       | ARHGAP15                | AP3S1                                         | AFAR3       | AGPAT5                            | ACADSB                                        | ACBD6                                                |
| ANKMY2       | ARHGAP30                | APPBP2                                        | AFF1        | AGPAT6                            | ACAT2                                         | ACBD7                                                |
| ANKRD13A     | ARHGEF2                 | AQP1                                          | AGGF1       | AGRN                              | ACCS                                          | ACE2                                                 |
| ANKRD26      | ARHGEF5L                | ARFGAP1                                       | AGPAT3      | AHCY                              | ACER2                                         | ACIN1                                                |
| ANKRD36      | ARIH1                   | ARID4B                                        | AGPS        | AHR                               | ACHE                                          | ACN9                                                 |
| ANKRD54      | ARL9                    | ARL15                                         | AGXT2L2     | AHSA2                             | ACMSD                                         | ACOT2                                                |
| ANKRD6       | ARRDC3                  | ARL3                                          | AIDA        | AKAP7                             | ACO1                                          | ACOT7                                                |
| ANKZF1       | ASCL2                   | ARMCX3                                        | AIP         | AKR1A1                            | ACOT1                                         | ACOT9                                                |
| ANO6         | ASTE1                   | ASAP1IT1                                      | AIRE        | AKR1B10                           | ACOT12                                        | ACOX1                                                |
| ANP32A       | ATF2                    | ASCL5                                         | AK3         | AKR1B15                           | ACOT4                                         | ACOX2                                                |
| API5         | ATP10A                  | ATF4                                          | AKAP1       | AKT1                              | ACSL4                                         | ACOX3                                                |

|          |           |           |           |          |          |          |
|----------|-----------|-----------|-----------|----------|----------|----------|
| APLP2    | ATP5H     | ATF7IP2   | AKAP10    | AKT1S1   | ACSM2A   | ACOXL    |
| APOBEC3B | ATP6V1G1  | ATG2B     | AKAP11    | ALAS1    | ACSM2B   | ACP2     |
| APOLD1   | ATP7A     | ATG4B     | AKAP8     | ALDH3A2  | ACSM5    | ACP5     |
| APRT     | ATP8B4    | ATG4D     | AKR7A2    | ALG1     | ACTC1    | ACSF2    |
| AQP10    | AXIN1     | ATG9A     | AKR7L     | ALG13    | ACTN1    | ACSL1    |
| ARD1A    | AZU1      | ATL3      | ALG2      | ALG3     | ACTR1A   | ACSL3    |
| ARF5     | B3GALT2   | ATP13A2   | ALG5      | AMD1     | ACTR3    | ACSL5    |
| ARHGAP1  | BAG4      | ATP2A2    | ALOX5     | AMOT     | ACTR6    | ACSM3    |
| ARHGAP18 | BAZ1B     | ATP5G1    | ALOXE3    | ANAPC11  | ACTRT1   | ACSS2    |
| ARHGAP20 | BBC3      | ATP6V0A1  | ALPI      | ANGPTL2  | ACVR1    | ACTA1    |
| ARHGAP21 | BCAT2     | ATP6V1F   | ALPK1     | ANKRD17  | ACVR1B   | ACTB     |
| ARHGAP27 | BCL2L14   | ATP9B     | ALPP      | ANKRD23  | ACY1     | ACTG1    |
| ARHGAP29 | BCL6B     | ATXN1     | ALS2      | ANKRD37  | ACY3     | ACTL6A   |
| ARHGEF11 | BICD2     | ATXN2L    | ALS2CL    | ANKRD44  | ACYP2    | ACTR5    |
| ARHGEF18 | BIK       | ATXN7L2   | ALS2CR14  | ANKRD57  | ADAM17   | ACVR2A   |
| ARMC8    | BPI       | AVEN      | AMAC1L3   | ANXA11   | ADAMTSL2 | ACVR2B   |
| ARPC3    | BRMS1L    | BAGE5     | AMY2B     | ANXA2P3  | ADAMTSL3 | ADA      |
| ARSJ     | BST1      | BAP1      | ANAPC13   | ANXA8    | ADAR     | ADAM10   |
| ASB6     | BTBD1     | BCAR3     | ANAPC4    | ANXA8L2  | ADD2     | ADAM19   |
| ATAD2B   | BZRPL1    | BCAS2     | ANAPC5    | AP1G1    | ADD3     | ADAM22   |
| ATP10B   | C10orf114 | BCL2      | ANGEL2    | AP1G2    | ADH1C    | ADAM23   |
| ATP13A3  | C10orf12  | BCL7C     | ANKRD19   | AP1S2    | ADH4     | ADAM9    |
| ATP5C1   | C10orf128 | BCLAF1    | ANKRD27   | AP3B1    | ADH6     | ADAMTS1  |
| ATP5S    | C10orf57  | BEGAIN    | ANKRD29   | APH1A    | ADI1     | ADAMTS19 |
| ATP6AP1  | C11orf21  | BGN       | ANKRD30B  | APITD1   | ADM      | ADAMTS9  |
| ATP6AP1L | C11orf49  | BLOC1S2   | ANKRD32   | APOBEC3D | ADNP     | ADAMTSL1 |
| ATP6V1B2 | C11orf71  | BNIP1     | ANKRD39   | APOBEC3G | ADORA3   | ADAP2    |
| ATP6V1C2 | C12orf41  | BPGM      | ANKRD40   | APOL2    | AFAP1    | ADCK1    |
| ATP6V1D  | C13orf7   | BRE       | ANKRD49   | AR       | AGFG2    | ADCY3    |
| ATXN1L   | C14orf159 | BRI3BP    | ANLN      | ARF1     | AGK      | ADCY6    |
| ATXN7L3  | C16orf30  | BRUNOL6   | ANP32E    | ARF4     | AGMAT    | ADCY8    |
| AUH      | C16orf38  | BTG2      | ANXA7     | ARHGAP17 | AGTR1    | ADH1A    |
| AURKC    | C16orf57  | BTK       | AOAH      | ARHGAP19 | AGXT     | ADHFE1   |
| B3GALT4  | C16orf88  | BYSL      | AP2M1     | ARHGAP25 | AGXT2    | ADM2     |
| B3GAT3   | C17orf44  | C10orf2   | AP3S2     | ARHGAP4  | AHCYL2   | ADO      |
| B3GNT1   | C17orf87  | C10orf76  | AP4B1     | ARHGEF6  | AHNAK2   | ADORA2B  |
| B3GNT5   | C18orf1   | C12orf66  | APBA2BP   | ARIH2    | AHSG     | ADRA1B   |
| BAHCC1   | C18orf2   | C14orf100 | APBB3     | ARL1     | AHSP     | ADRB2    |
| BAI2     | C18orf45  | C14orf126 | APEG1     | ARL4C    | AIF1     | ADSL     |
| BANF1    | C18orf51  | C14orf138 | APOL1     | ARL4D    | AIFM1    | ADSS     |
| BAX      | C19orf22  | C14orf169 | APOOL     | ARL6IP5  | AIFM2    | ADSSL1   |
| BBS1     | C19orf30  | C14orf45  | AQP7      | ARMCX6   | AK1      | AEBP1    |
| BBS12    | C19orf33  | C15orf28  | AQP9      | ARNTL    | AK2      | AEBP2    |
| BCAR4    | C19orf42  | C16orf5   | ARFGAP3   | ARPC5L   | AKR1C4   | AEN      |
| BCL2L2   | C19orf59  | C16orf87  | ARHGAP11B | ARRB1    | AKR1E2   | AFAP1L2  |
| BCMO1    | C19orf67  | C17orf101 | ARHG DIA  | ARRDC1   | AKR7A3   | AFM      |
| BET1     | C1orf131  | C17orf76  | ARHGEF10L | ARSB     | AKT3     | AFMID    |
| BLCAP    | C1orf175  | C18orf21  | ARID1A    | ASF1A    | ALCAM    | AFP      |
| BMF      | C1orf186  | C1orf116  | ARID5A    | ASH2L    | ALDH18A1 | AFTPH    |
| BMP5     | C1orf25   | C1orf152  | ARL13B    | ASTN1    | ALDH2    | AGAP3    |

|           |           |          |          |           |          |         |
|-----------|-----------|----------|----------|-----------|----------|---------|
| BMP6      | C1orf31   | C1orf43  | ARL14    | ATG16L1   | ALDH3B1  | AGBL5   |
| BNC1      | C1orf69   | C20orf7  | ARL17P1  | ATG3      | ALDH8A1  | AGPAT2  |
| BOC       | C1orf92   | C21orf59 | ARL8B    | ATL1      | ALDOB    | AGPAT4  |
| BRCA1     | C1QTNF5   | C21orf91 | ARMC1    | ATP1A1    | ALG9     | AGPAT9  |
| BRD4      | C20orf12  | C22orf29 | ARMC5    | ATP1B1    | ALKBH7   | AGT     |
| BRF1      | C20orf132 | C2orf32  | ARMET    | ATP2B1    | ALOX5AP  | AGTPBP1 |
| BTAF1     | C20orf175 | C3orf52  | ARP11    | ATP6V0E1  | ALX1     | AGTRAP  |
| BUB3      | C21orf124 | C3orf70  | ART1     | ATPAF1    | AMBP     | AGXT2L1 |
| C10orf118 | C22orf28  | C5orf23  | ARVCF    | AURKB     | AMDHD2   | AHNAK   |
| C10orf41  | C2orf24   | C5orf25  | ASB13    | B9D1      | AMICA1   | AIF1L   |
| C10orf61  | C2orf42   | C5orf30  | ASIP     | BACH2     | AMN1     | AIG1    |
| C10orf73  | C2orf64   | C5orf53  | ASNA1    | BAD       | AMT      | AIMP2   |
| C11orf10  | C2orf88   | C6orf134 | ATG10    | BAG3      | AMY1A    | AJAP1   |
| C11orf46  | C3AR1     | C6orf72  | ATG7     | BANP      | AMY1B    | AK3L1   |
| C11orf57  | C3orf32   | C6orf85  | ATM      | BAT2      | AMY1C    | AKAP12  |
| C11orf59  | C3orf58   | C7orf63  | ATMIN    | BAT3      | ANGPTL3  | AKAP13  |
| C11orf68  | C5AR1     | C7orf68  | ATOH8    | BAZ2B     | ANGPTL6  | AKIRIN1 |
| C11orf75  | C5orf20   | C8orf33  | ATP13A1  | BCL3      | ANK1     | AKNA    |
| C12orf52  | C5orf24   | C8orf38  | ATP2C2   | BCL7B     | ANKHD1   | AKR1B1  |
| C13orf25  | C5orf27   | C8orf44  | ATP5A1   | BCL9L     | ANKRA2   | AKR1C2  |
| C13orf27  | C5orf45   | C9orf123 | ATP6AP2  | BET1L     | ANKRD11  | AKR1C3  |
| C14orf124 | C6orf1    | C9orf127 | ATP6V0A2 | BEX2      | ANKRD13C | AKR1D1  |
| C14orf2   | C6orf182  | C9orf43  | ATP6V1A  | BEX4      | ANKRD36B | AKTIP   |
| C14orf72  | C6orf184  | C9orf6   | ATP8B2   | BFSP1     | ANKRD46  | ALAD    |
| C15orf38  | C6orf81   | C9orf82  | ATPBD3   | BHLHB2    | ANKS3    | ALB     |
| C15orf39  | C7        | C9orf91  | ATRIP    | BIRC3     | ANP32B   | ALDH1A1 |
| C16orf55  | C7orf36   | CA8      | ATXN2    | BIRC5     | ANXA10   | ALDH1A2 |
| C16orf61  | C9orf16   | CAB39L   | AURKA    | BLZF1     | ANXA13   | ALDH1A3 |
| C16orf80  | C9orf30   | CABLES1  | AVPR2    | BMP2      | ANXA4    | ALDH1B1 |
| C17orf28  | C9orf66   | CALCA    | B4GALT3  | BNIPL     | ANXA9    | ALDH1L1 |
| C17orf39  | C9orf9    | CALD1    | BAHD1    | BOLA2     | AOF2     | ALDH1L2 |
| C17orf62  | CA1       | CAMK1G   | BATF3    | BPNT1     | AP1M2    | ALDH4A1 |
| C17orf85  | CADPS     | CAMK2D   | BCKDHA   | BRD8      | AP2A2    | ALDH5A1 |
| C19orf39  | CALCRL    | CAP2     | BCL7A    | BRPF3     | AP3B2    | ALDH6A1 |
| C19orf47  | CAMP      | CAV1     | BCYRN1   | BTBD3     | AP3M1    | ALDH9A1 |
| C19orf60  | CAMSAP1   | CBS      | BDH2     | BTBD7     | APBB2    | ALDOA   |
| C1orf102  | CAP1      | CBX3     | BECN1    | BTG3      | APCDD1L  | ALDOC   |
| C1orf105  | CARD9     | CCDC128  | BEND5    | BUB1      | APCS     | ALG10B  |
| C1orf128  | CASC5     | CCDC146  | BEXL1    | BZW1      | APLNR    | ALG14   |
| C1orf172  | CBFA2T3   | CCDC3    | BIN3     | C10orf104 | APLP1    | ALG6    |
| C1orf21   | CBLN4     | CCDC55   | BIRC6    | C10orf26  | APOA5    | ALG8    |
| C1orf213  | CCDC147   | CCDC86   | BLM      | C11orf35  | APOC2    | ALKBH1  |
| C1orf229  | CCDC26    | CCK      | BMS1     | C11orf51  | APOC4    | ALKBH3  |
| C1orf56   | CCDC52    | CCL2     | BMS1P5   | C12orf10  | APOF     | ALKBH5  |
| C1orf9    | CCL21     | CCNDBP1  | BNIP2    | C12orf48  | APOH     | ALKBH8  |
| C1orf93   | CCL23     | CCNYL1   | BPHL     | C12orf76  | APOL3    | ALOX12B |
| C1QTNF1   | CCL8      | CCRN4L   | BRD1     | C14orf135 | APTX     | ALOX15B |
| C20orf151 | CCNO      | CD1D     | BRI3     | C14orf153 | AQP12A   | ALPK2   |
| C20orf194 | CCR1      | CD247    | BRI3P1   | C14orf167 | AQP7P1   | ALPL    |
| C20orf43  | CCR6      | CD7      | BRMS1    | C14orf79  | AQP7P2   | ALPPL2  |

|           |          |         |           |           |           |           |
|-----------|----------|---------|-----------|-----------|-----------|-----------|
| C21orf129 | CCRL2    | CD97    | BSG       | C14orf82  | AQR       | ALS2CR4   |
| C21orf30  | CD163L1  | CDC14B  | BSPRY     | C15orf44  | ARC       | AMACR     |
| C21orf71  | CD1A     | CDC2L6  | BTN2A2    | C15orf63  | ARF3      | AMDHD1    |
| C21orf81  | CD209    | CDH15   | BTN3A2    | C16orf67  | ARFGAP2   | AMFR      |
| C22orf9   | CD276    | CDH5    | C10orf108 | C16orf72  | ARFIP1    | AMMECR1   |
| C2orf30   | CD300A   | CDK8    | C10orf119 | C16orf79  | ARG1      | AMPH      |
| C2orf47   | CD300C   | CEBPG   | C10orf137 | C16orf91  | ARGLU1    | AMY2A     |
| C3orf15   | CD33     | CECR5   | C10orf21  | C17orf41  | ARHGAP11A | AMZ2      |
| C3orf50   | CD37     | CEP250  | C10orf39  | C17orf42  | ARHGAP23  | ANAPC1    |
| C4orf16   | CD38     | CETN2   | C10orf4   | C17orf45  | ARHGAP8   | ANAPC10   |
| C4orf31   | CD4      | CGA     | C10orf72  | C17orf49  | ARHGEF10  | ANG       |
| C4orf48   | CD48     | CH25H   | C11orf24  | C17orf79  | ARHGEF16  | ANGPT1    |
| C4orf49   | CD52     | CHMP2B  | C11orf31  | C17orf89  | ARHGEF4   | ANGPTL4   |
| C5orf15   | CD53     | CHORDC1 | C11orf48  | C18orf10  | ARID2     | ANK2      |
| C5orf51   | CD5L     | CHST9   | C11orf67  | C18orf22  | ARID3B    | ANK3      |
| C6orf136  | CD81     | CHSY3   | C11orf74  | C18orf55  | ARID4A    | ANKDD1A   |
| C6orf203  | CD84     | CKLF    | C11orf91  | C18orf56  | ARL2BP    | ANKFY1    |
| C6orf208  | CDADC1   | CLEC14A | C12orf28  | C19orf20  | ARL5A     | ANKIB1    |
| C6orf221  | CDC26    | CLIC3   | C12orf29  | C19orf28  | ARL5B     | ANKMY1    |
| C7orf11   | CDC42SE2 | CLK4    | C12orf34  | C19orf62  | ARL6IP4   | ANKRD1    |
| C7orf25   | CDKN2D   | CNIH    | C12orf39  | C19orf71  | ARMC9     | ANKRD12   |
| C8orf40   | CEACAM8  | CNN3    | C12orf64  | C1orf109  | ARMCX1    | ANKRD20A1 |
| C8orf76   | CECR4    | CNNM4   | C12orf73  | C1orf198  | ARNT      | ANKRD24   |
| C9orf164  | CENTG2   | CNPY3   | C13orf1   | C1orf54   | ARPC1A    | ANKRD33   |
| C9orf41   | CEP170   | CNTLN   | C13orf18  | C1orf59   | ARPC2     | ANKRD35   |
| CA3       | CERK     | COBL    | C14orf106 | C1orf77   | ARPP19    | ANKRD43   |
| CA5B      | CES3     | COL16A1 | C14orf147 | C20orf117 | ARRDC2    | ANKRD50   |
| CACNG4    | CETP     | COL2A1  | C14orf174 | C20orf160 | ARRDC4    | ANKS1A    |
| CAMK1D    | CFHR4    | COX15   | C14orf19  | C20orf24  | ARS2      | ANKS4B    |
| CANX      | CFP      | CPE     | C14orf85  | C20orf27  | ARSK      | ANO1      |
| CAPN14    | CHML     | CRAMP1L | C14orf93  | C20orf4   | ARV1      | ANO10     |
| CAPN6     | CHRNA10  | CRB1    | C15orf21  | C20orf94  | AS3MT     | ANO2      |
| CAPS      | CHRNB1   | CREB3L2 | C15orf48  | C21orf33  | ASB1      | ANO4      |
| CASP9     | CINP     | CRIPAK  | C16orf33  | C22orf27  | ASCC1     | ANP32C    |
| CASQ2     | CISH     | CRYBB2  | C16orf45  | C22orf30  | ASCC2     | ANPEP     |
| CBFA2T2   | CLC      | CSF3R   | C16orf53  | C2CD4B    | ASF1B     | ANTXR1    |
| CBFB      | CLDN2    | CSMD2   | C16orf63  | C2orf40   | ASH1L     | ANTXR2    |
| CBWD5     | CLDND2   | CTNNA2  | C17orf37  | C2orf60   | ASL       | ANXA1     |
| CCAR1     | CLEC10A  | CTSE    | C17orf67  | C2orf63   | ASPA      | ANXA2     |
| CCBL1     | CLEC12A  | CUTC    | C17orf75  | C2orf69   | ASPG      | ANXA2P1   |
| CCDC105   | CLEC1B   | CXorf26 | C17orf88  | C3orf34   | ASPH      | ANXA3     |
| CCDC111   | CLEC3B   | CYP11A1 | C17orf90  | C4orf29   | ASPM      | ANXA6     |
| CCDC132   | CLEC4G   | CYP19A1 | C17orf97  | C4orf34   | ASPSCR1   | AOX1      |
| CCDC134   | CLEC4M   | CYP1B1  | C17orf98  | C5orf21   | ASXL2     | AP1B1     |
| CCDC35    | CLIC2    | CYP4Z2P | C18orf18  | C5orf35   | ATAD2     | AP1M1     |
| CCDC6     | CLOCK    | CYR61   | C18orf19  | C5orf54   | ATCAY     | AP2A1     |
| CCDC71    | CLTB     | CYTH2   | C18orf32  | C6orf106  | ATF1      | AP2B1     |
| CCDC85B   | CLTCL1   | DAAM1   | C18orf8   | C6orf145  | ATF6B     | AP3M2     |
| CCDC96    | CMAH     | DACH1   | C19orf10  | C6orf162  | ATF7IP    | AP4E1     |
| CCDC97    | CMPK2    | DAG1    | C19orf24  | C6orf47   | ATG12     | APAF1     |

|          |         |             |           |          |          |          |
|----------|---------|-------------|-----------|----------|----------|----------|
| CCNG2    | CMTM2   | DAGLB       | C19orf29  | C9orf23  | ATP2B2   | APBB1IP  |
| CCNH     | CMTM5   | DBR1        | C19orf36  | C9orf25  | ATP4A    | APEX1    |
| CCNT2    | CNIH3   | DCAF10      | C19orf38  | C9orf45  | ATP5D    | APH1B    |
| CCR7     | CNOT2   | DCDC2       | C19orf61  | C9orf5   | ATP5G3   | APIP     |
| CCT6B    | CNPY2   | DDX23       | C19orf63  | C9orf86  | ATP5J    | APOA1    |
| CD55     | CNPY4   | DENND5A     | C1GALT1C1 | CA9      | ATP5SL   | APOA2    |
| CD63     | CNR1    | DENND5B     | C1orf107  | CABC1    | ATP6V0A4 | APOA4    |
| CDC14A   | CNTFR   | DGKD        | C1orf123  | CACNA1C  | ATP6V0E2 | APOB     |
| CDGAP    | COG4    | DHODH       | C1orf124  | CACYBP   | ATPAF2   | APOBEC3F |
| CDH24    | COL14A1 | DHX30       | C1orf144  | CADM4    | ATPIF1   | APOC1    |
| CDH8     | COLEC10 | DIO3        | C1orf149  | CADPS2   | ATXN3    | APOC3    |
| CDK3     | COMMD1  | DIO3OS      | C1orf151  | CALCR    | AURKAPS1 | APOE     |
| CDK5R1   | COMMD4  | DIRC2       | C1orf165  | CALHM3   | AVPI1    | APOM     |
| CDKN2AIP | COPS2   | DIXDC1      | C1orf166  | CAND1    | AZGP1    | APOO     |
| CEACAM6  | COPS6   | dJ341D10.1  | C1orf190  | CANT1    | AZI1     | APP      |
| CEP350   | CORO1A  | DLC1        | C1orf200  | CAPN11   | B2M      | APPL2    |
| CERCAM   | CPA3    | DLGAP4      | C1orf212  | CAPN2    | B3GALNT1 | AQP11    |
| CFDP1    | CPNE8   | DLK2        | C1orf216  | CAPNS1   | B3GALNT2 | AQP3     |
| CFTR     | CPOX    | DNAJC25-GNC | C1orf52   | CASZ1    | B3GALT5  | ARAP3    |
| CGB      | CR1L    | DNAJC4      | C1orf81   | CATSPER2 | B3GNTL1  | ARCN1    |
| CGB7     | CREBL2  | DNAJC5      | C1orf85   | CBLB     | B4GALT6  | ARFGF1   |
| CGB8     | CSAG1   | DNASE1L1    | C1orf89   | CBLL1    | B9D2     | ARG2     |
| CHCHD7   | CSH1    | DNHD1       | C20orf11  | CBWD3    | BAAT     | ARHGAP10 |
| CHD2     | CSH2    | DNLZ        | C20orf196 | CBY1     | BAG5     | ARHGAP12 |
| CHD6     | CST7    | DOCK5       | C20orf45  | CCDC125  | BAIAP2L1 | ARHGAP22 |
| CHERP    | CTGLF1  | DOCK8       | C20orf62  | CCDC21   | BAK1     | ARHGAP24 |
| CHKB     | CTSG    | DPM1        | C21orf119 | CCDC23   | BAT2D1   | ARHGAP28 |
| CHST11   | CUL4A   | DPY19L1     | C21orf126 | CCDC24   | BAZ1A    | ARHGAP9  |
| CHST14   | CX3CR1  | DPY19L2P2   | C21orf24  | CCDC49   | BBOX1    | ARHGDI1  |
| CIAO1    | CXADR   | DSC2        | C21orf55  | CCDC66   | BBS10    | ARHGEF1  |
| CISD1    | CXCR4   | DSC3        | C21orf56  | CCDC8    | BBS2     | ARHGEF12 |
| CIZ1     | CYBB    | DST         | C2orf18   | CCDC88A  | BBS4     | ARHGEF17 |
| CKAP4    | CYGB    | DUSP5       | C2orf43   | CCDC93   | BCAP29   | ARHGEF19 |
| CLCN6    | CYorf14 | DUSP9       | C2orf44   | CCND1    | BCHE     | ARHGEF3  |
| CLDN9    | CYTH4   | DVL3        | C2orf89   | CCNE2    | BCL2L10  | ARHGEF5  |
| CLEC1A   | DAAM2   | DYRK2       | C3orf19   | CD320    | BCL2L11  | ARHGEF9  |
| CLEC4D   | DARC    | E2F3        | C3orf36   | CD44     | BCL9     | ARID3A   |
| CLN6     | DCDC5   | ECSCR       | C3orf37   | CD46     | BDH1     | ARID5B   |
| CLPP     | DCHS1   | EFNB1       | C3orf39   | CD72     | BDNF     | ARL16    |
| CLSTN2   | DCUN1D1 | EGFL7       | C3orf41   | CDA      | BFAR     | ARL17B   |
| CMC1     | DCUN1D2 | EGR2        | C4A       | CDC14C   | BHMT     | ARL2     |
| CNTN4    | DDX5    | EIF2C3      | C4B       | CDC2     | BHMT2    | ARL4A    |
| CNTROB   | DEFA1   | EIF2S2      | C4orf32   | CDC20    | BID      | ARL6     |
| COG1     | DEFA1B  | EIF3CL      | C4orf38   | CDC25A   | BLOC1S1  | ARL6IP6  |
| COL11A2  | DEFA3   | EIF4A1      | C5orf22   | CDC25B   | BLVRB    | ARMC10   |
| COL15A1  | DEFA4   | EIF4G2      | C5orf39   | CDC40    | BMP2K    | ARMC4    |
| COL18A1  | DEPDC4  | EIF5A       | C5orf43   | CDC42BPB | BMPER    | ARMC6    |
| COL8A2   | DERL2   | ELF4        | C5orf46   | CDC42EP1 | BMX      | ARMC7    |
| COLQ     | DFFB    | ELL3        | C6orf122  | CDC45L   | BNC2     | ARMCX2   |
| COMMD5   | DGCR8   | ELMOD2      | C6orf130  | CDCA8    | BNIP3L   | ARMCX4   |

|            |             |          |           |         |           |        |
|------------|-------------|----------|-----------|---------|-----------|--------|
| COPA       | DHFR        | EML2     | C6orf138  | CDH10   | BOAT      | ARNT2  |
| COPB1      | DHFRL1      | EMP1     | C6orf142  | CDH11   | BOLA3     | ARPC1B |
| COPB2      | DHRS13      | EPB41    | C6orf165  | CDIPT   | BPTF      | ARPC4  |
| COPG2IT1   | DHX29       | EPDR1    | C6orf167  | CDK2    | BRAF      | ARSA   |
| COPS3      | DKFZP564O05 | EPS8L1   | C6orf222  | CDK4    | BRD3      | ARSD   |
| COPS5      | DLEU2       | ERCC1    | C6orf225  | CDK9    | BRD7      | ARSE   |
| CORO1C     | DNAJA2      | ERP29    | C6orf26   | CDKN1C  | BRD7P2    | ARSG   |
| CORO7      | DNAJB11     | ESPL1    | C6orf62   | CDKN2B  | BRD9      | ART3   |
| COX4NB     | DNASE1L3    | EVC      | C6orf64   | CDKN2C  | BRP44L    | ART4   |
| CPA4       | DOCK10      | EVI1     | C6orf70   | CDKN3   | BRSK1     | ART5   |
| CREBBP     | DOCK6       | EYA2     | C7orf13   | CDRT4   | BRSK2     | ARTN   |
| CRH        | DOK2        | FAM101A  | C7orf29   | CDT1    | BRWD1     | ASAH1  |
| CRKL       | DPEP2       | FAM120B  | C7orf49   | CECR1   | BRWD2     | ASAM   |
| CRNKL1     | DPT         | FAM125B  | C7orf58   | CECR7   | BRWD3     | ASAP1  |
| CRSP9      | DPYSL5      | FAM150B  | C7orf59   | CENPA   | BSCL2     | ASAP2  |
| CRYBA1     | DRAP1       | FAM178A  | C7orf65   | CENPL   | BSDC1     | ASB3   |
| CSGALNACT1 | DSCR10      | FAM179B  | C8orf37   | CENPM   | BSN       | ASB7   |
| CSN1S1     | DSCR3       | FAM20B   | C8orf45   | CENPN   | BTBD16    | ASB8   |
| CSPP1      | DTNB        | FAM80A   | C8orf46   | CENPO   | BTBD2     | ASB9   |
| CST4       | DUSP13      | FAM90A2P | C9        | CENPP   | BTN3A3    | ASCC3  |
| CTAGE5     | DUSP15      | FAM92A1  | C9orf100S | CENPV   | BVES      | ASGR1  |
| CTNNAL1    | DUSP21      | FANCF    | C9orf114  | CENTG3  | C10orf11  | ASGR2  |
| CTPS       | DYNLT1      | FBXL13   | C9orf119  | CEP135  | C10orf116 | ASMTL  |
| CUBN       | DYRK4       | FBXL18   | C9orf130  | CEPT1   | C10orf65  | ASNS   |
| CUL1       | E2F4        | FBXO18   | C9orf167  | CGB1    | C10orf68  | ASPHD1 |
| CUL7       | E2F6        | FBXO2    | C9orf38   | CGB5    | C10orf82  | ASPHD2 |
| CUL9       | E2F8        | FBXO38   | C9orf7    | CGGBP1  | C10orf88  | ASRGL1 |
| CUX1       | ECSIT       | FBXO44   | C9orf75   | CGI-96  | C11orf17  | ASS1   |
| CXCR6      | EDEM3       | FBXW7    | C9orf89   | CGN     | C11orf45  | ASTN2  |
| CXorf40B   | EEF1D       | FCHO2    | CA13      | CGNL1   | C11orf60  | ASXL1  |
| CXorf56    | EGLN3       | FCHSD2   | CABIN1    | CHAC2   | C11orf61  | ATAD1  |
| CXXC5      | EHD3        | FIP1L1   | CADM3     | CHD8    | C11orf70  | ATE1   |
| CYB5D1     | EIF1AY      | FJX1     | CALN1     | CHMP1A  | C11orf84  | ATF3   |
| CYC1       | EIF2C2      | FLJ10996 | CAMK2B    | CHMP4B  | C12orf30  | ATF5   |
| CYHR1      | EIF4EBP2    | FLJ20489 | CAMKK2    | CHPF    | C12orf35  | ATF6   |
| CYP46A1    | ELANE       | FLJ20628 | CAMTA1    | CICE    | C12orf4   | ATG2A  |
| DAGLA      | ELN         | FMOD     | CAMTA2    | CIDEA   | C12orf43  | ATG4A  |
| DCAKD      | ELOVL7      | FNTA     | CAPN5     | CKAP2   | C12orf49  | ATG4C  |
| DCLK2      | ELP2P       | FOXA3    | CASC4     | CKS2    | C12orf57  | ATG5   |
| DCTD       | ELP3        | FOXC1    | CASD1     | CLDN19  | C12orf62  | ATHL1  |
| DCX        | EMCN        | FOXI3    | CBR4      | CLIP1   | C14orf105 | ATIC   |
| DDA1       | EMID1       | FOXJ2    | CBX5      | CLN5    | C14orf131 | ATN1   |
| DDAH1      | EMILIN1     | FYB      | CC2D1B    | CLUAP1  | C14orf132 | ATOX1  |
| DDAH2      | ENG         | FZD4     | CC2D2A    | CMAS    | C14orf133 | ATP11B |
| DDX24      | ENO1        | GAA      | CCDC103   | CMIP    | C14orf143 | ATP11C |
| DEFA6      | ENTPD1      | GAB1     | CCDC106   | CMTM6   | C14orf145 | ATP12A |
| DERA       | EPB42       | GAB2     | CCDC107   | COG6    | C14orf166 | ATP1A2 |
| DFNA5      | ERCC6       | GABPB1   | CCDC121   | COL13A1 | C14orf179 | ATP1B2 |
| DFNB31     | ERGIC2      | GAPVD1   | CCDC13    | COL4A1  | C14orf4   | ATP1B3 |
| DGCR6      | ERI2        | GAR1     | CCDC130   | COL6A1  | C14orf68  | ATP2B4 |

|             |          |          |          |         |           |          |
|-------------|----------|----------|----------|---------|-----------|----------|
| DIP2B       | ERICH1   | GAS6     | CCDC14   | COL6A2  | C14orf73  | ATP2C1   |
| DIP2C       | EXD3     | GATA5    | CCDC15   | COL9A1  | C14orf78  | ATP5E    |
| DIRAS2      | EXOD1    | GDPD3    | CCDC150  | COLEC12 | C15orf41  | ATP5EP2  |
| DISP1       | F13A1    | GDPD5    | CCDC17   | COMTD1  | C15orf42  | ATP5F1   |
| DKFZP434L18 | F2RL1    | GNB1L    | CCDC25   | COPG    | C15orf52  | ATP5G2   |
| DKK1        | FAAH2    | GNL3L    | CCDC47   | COPS4   | C16orf13  | ATP5I    |
| DLD         | FABP3    | GNS      | CCDC53   | COQ2    | C16orf50  | ATP5J2   |
| DMPK        | FAIM3    | GOLGA1   | CCDC72   | COQ6    | C16orf52  | ATP5L    |
| DMRT1       | FAM109B  | GOLGA2   | CCDC76   | CORO2B  | C16orf62  | ATP5O    |
| DNAH2       | FAM111A  | GPBAR1   | CCDC81   | CPD     | C16orf7   | ATP6V0B  |
| DNAJC13     | FAM113A  | GPC5     | CCDC88B  | CPNE1   | C16orf70  | ATP6V0C  |
| DNAJC14     | FAM117A  | GPRC5A   | CCDC88C  | CPNE3   | C16orf73  | ATP6V0D1 |
| DNAJC17     | FAM129C  | GREM1    | CCDC94   | CREB1   | C16orf86  | ATP6V1B1 |
| DNAJC19     | FAM171A1 | GRRP1    | CCL13    | CRELD1  | C16orf93  | ATP6V1E2 |
| DNAJC7      | FAM178B  | GTF3C6   | CCL16    | CRELD2  | C17orf106 | ATP6V1G2 |
| DOC2A       | FAM188A  | GTPBP4   | CCNB1    | CRYM    | C17orf48  | ATP6V1H  |
| DOCK9       | FAM22A   | GUCY1A3  | CCNL2    | CSNK1G1 | C17orf71  | ATP7B    |
| DPP3        | FAM22D   | H3F3B    | CCNY     | CSPG4   | C18orf54  | ATP8B3   |
| DSC1        | FAM26F   | HACL1    | CCR2     | CSTB    | C19orf43  | ATP9A    |
| DUOX2       | FAM53B   | HAND2    | CCT5     | CTCF    | C19orf50  | ATPBD1B  |
| DUOXA2      | FAM55C   | HCG18    | CCT8     | CTDP1   | C1GALT1   | ATPBD4   |
| DUSP18      | FAM73B   | HCN3     | CD300E   | CTDSPL  | C1orf112  | ATRN     |
| DUSP5P      | FAM76A   | HEBP1    | CD40     | CTGLF3  | C1orf162  | AUTS2    |
| DVL2        | FAM82A2  | HECTD1   | CD83     | CTSF    | C1orf168  | AVL9     |
| DYNC1L12    | FAM83F   | HES2     | CDC34    | CUGBP2  | C1orf26   | AVP      |
| DYNLRB2     | FAM90A6P | HES4     | CDC37L1  | CUTL1   | C1orf41   | AXIN2    |
| DYRK1A      | FAM99A   | HIST1H4K | CDC42EP2 | CXCL14  | C1orf53   | AXL      |
| EAPP        | FAM9A    | HIST3H3  | CDCA2    | CXCR7   | C1orf55   | AXUD1    |
| ECE1        | FBXL12   | HLA-DMA  | CDH2     | CYP2U1  | C1orf96   | AYP1p1   |
| EDC4        | FBXL17   | HLA-DMB  | CDH20    | CYP4X1  | C1QA      | AZIN1    |
| EEA1        | FBXO16   | HNRNPAB  | CDH6     | CYTH3   | C1QB      | B3GALT6  |
| EFCAB3      | FBXO9    | HNRNPC   | CDK10    | DACH2   | C1QC      | B3GAT1   |
| EI24        | FBXW11   | HNRNPM   | CDKL2    | DACT3   | C1QL2     | B3GNT2   |
| EIF3J       | FCER1A   | HNRPM    | CDNF     | DAD1    | C2        | B3GNT6   |
| EIF4ENIF1   | FCGBP    | HOPX     | CDV3     | DAPK1   | C20orf111 | B4GALNT4 |
| EIF4H       | FCGR2B   | HOXA6    | CDYL     | DCAF7   | C20orf127 | B4GALT1  |
| ELAVL3      | FCN1     | HOXB5    | CDYL2    | DCHS2   | C20orf177 | B4GALT4  |
| ELF2        | FCN2     | HP1BP3   | CENPI    | DCP1A   | C20orf20  | BACE1    |
| ELMOD1      | FCRL2    | HPS1     | CEP110   | DCPS    | C20orf54  | BACE2    |
| ELOVL5      | FCRLA    | HSD17B1  | CEP120   | DCTN1   | C21orf2   | BAIAP2   |
| ENOX1       | FDXR     | HSD17B14 | CEP164   | DCTPP1  | C21orf34  | BAIAP2L2 |
| ENPP1       | FECH     | HSMT1    | CEP192   | DDEF2   | C21orf57  | BAMBI    |
| ENY2        | FEM1B    | HTR2A    | CEP27    | DDHD2   | C21orf66  | BAPX1    |
| EPHB3       | FGD3     | HTRA2    | CEP290   | DDX12   | C21orf7   | BARD1    |
| EPM2A       | FKBPL    | HYLS1    | CES1     | DDX17   | C22orf36  | BARX1    |
| ERBB2       | FLI1     | IER2     | CES4     | DDX39   | C2orf37   | BASP1    |
| ERGIC3      | FLII     | IFI16    | CFHR3    | DEF6    | C2orf49   | BAT1     |
| ERVWE1      | FLJ11827 | IFRD1    | CFHR5    | DEF8    | C2orf7    | BAT2L    |
| ESD         | FLJ23152 | IFT122   | CFL2     | DEFB1   | C3        | BAT5     |
| ETV7        | FLJ23834 | IL12A    | CHAD     | DEK     | C3orf18   | BBS7     |

|          |           |             |         |              |          |         |
|----------|-----------|-------------|---------|--------------|----------|---------|
| EWSR1    | FLJ31945  | ING5        | CHADL   | DENND2C      | C3orf21  | BBS9    |
| EXOC5    | FLJ32255  | INHBE       | CHCHD10 | DENND4B      | C3orf25  | BBX     |
| EXOC7    | FLJ33996  | IP6K2       | CHCHD5  | DEPDC1B      | C3orf31  | BCAM    |
| EXOSC2   | FLJ36070  | IPO13       | CHD1    | DEPDC5       | C3orf46  | BCAN    |
| EXPH5    | FLJ39827  | IRX3        | CHKA    | DEPDC7       | C3orf54  | BCAR1   |
| EYA1     | FLJ41170  | ITGB4       | CHMP1B  | DERL1        | C3orf59  | BCAS4   |
| FADD     | FLJ41603  | JAK2        | CHRDL2  | DGCR14       | C3orf60  | BCAT1   |
| FAF2     | FLJ42627  | JAZF1       | CHRNA2  | DHDDS        | C4BPA    | BCCIP   |
| FAM100B  | FLJ44290  | JMJD7       | CHST1   | DHH          | C4BPB    | BCKDHB  |
| FAM108A2 | FLJ44606  | JPH4        | CHST10  | DHPS         | C4orf14  | BCL10   |
| FAM10A4  | FLYWCH1   | KCMF1       | CHTF8   | DHRS11       | C4orf33  | BCL11A  |
| FAM118A  | FOLR2     | KCNJ16      | CIAPIN1 | DHTKD1       | C4orf41  | BCL11B  |
| FAM119B  | FOXC2     | KCNJ4       | CIDEC   | DHX32        | C5orf13  | BCL2L1  |
| FAM156A  | FOXD4     | KCNN4       | CLCN3   | DHX37        | C5orf32  | BCL2L12 |
| FAM156B  | FOXO1     | KCNT2       | CLDN20  | DHX40        | C5orf33  | BCL6    |
| FAM158A  | FOXS1     | KCTD1       | CLDN23  | DICER1       | C6       | BCOR    |
| FAM160B2 | FPR1      | KCTD3       | CLEC4A  | DKFZP5861142 | C6orf108 | BCORL1  |
| FAM168B  | FPR3      | KDELR2      | CLIP2   | DLEU1        | C6orf111 | BCR     |
| FAM173B  | FREQ      | KHNYN       | CLIP4   | DLST         | C6orf115 | BEND3   |
| FAM175B  | FTSJ3     | KIAA0430    | CLMN    | DMD          | C6orf124 | BEND4   |
| FAM183A  | GAB3      | KIAA0892    | CLN8    | DNAJA3       | C6orf132 | BEND6   |
| FAM193A  | GABARAPL2 | KIAA0922    | CLRN1   | DNAJB14      | C6orf141 | BEND7   |
| FAM19A3  | GALNT2    | KIAA1143    | CLTC    | DNAJC28      | C6orf173 | BEST1   |
| FAM20A   | GALNT5    | KIAA1345    | CLU     | DNAJC3       | C6orf192 | BEST2   |
| FAM23B   | GAPT      | KIAA1539    | CNDP1   | DNASE1       | C6orf52  | BEST4   |
| FAM39DP  | GAS2L1    | KIAA1641    | CNGB1   | DNMT3L       | C7orf23  | BEX1    |
| FAM47E   | GATA1     | KIFAP3      | CNNM2   | DOHH         | C7orf31  | BEX5    |
| FAM49A   | GDF1      | KLHDC8B     | CNOT10  | DOLK         | C7orf38  | BHLHB9  |
| FAM53A   | GDF15     | KLHL17      | CNOT8   | DOPEY1       | C7orf55  | BICD1   |
| FAM57B   | GDF5OS    | KLRAQ1      | COBRA1  | DOPEY2       | C8A      | BIN1    |
| FAM62B   | GF11B     | KPNA6       | COG3    | DPEP1        | C8B      | BIRC2   |
| FAM72B   | GGT5      | KRCC1       | COMMD8  | DPH2         | C8G      | BLMH    |
| FARS2    | GGT7      | KRT7        | COPZ2   | DPP10        | C8orf41  | BLVRA   |
| FASTKD2  | GGTL3     | KRTCAP2     | COQ10B  | DPP8         | C8orf42  | BMI1    |
| FASTKD3  | GIMAP1    | KRTCAP3     | CORO6   | DPY19L4      | C8orf47  | BMP1    |
| FBXL21   | GIMAP4    | LARP7       | COX16   | DRAM1        | C8ORFK36 | BMP4    |
| FDX1L    | GIMAP5    | LASS4       | COX19   | DSP          | C9orf100 | BMP7    |
| FHIT     | GIMAP6    | LATS2       | COX4I1  | DTL          | C9orf102 | BMPR1A  |
| FIBCD1   | GIMAP7    | LCOR        | COX5B   | DUS3L        | C9orf126 | BMPR2   |
| FKRP     | GIMAP8    | LEF1        | COX6C   | DUSP1        | C9orf150 | BNIP3   |
| FLJ11235 | GIYD1     | LEMD1       | COX7A2  | DUSP19       | C9orf156 | BOK     |
| FLJ16779 | GJA4      | LGALS2      | COX7A2L | DUSP22       | C9orf21  | BOP1    |
| FLJ20444 | GJC2      | LIN54       | COX7C   | DUSP23       | C9orf37  | BP75    |
| FLJ20718 | GJC3      | LITAF       | CPLX1   | DUSP3        | C9orf64  | BRIX1   |
| FLJ22222 | GKN2      | LLGL2       | CPPED1  | DUSP8        | C9orf78  | BRP44   |
| FLJ22639 | GLCC1     | LOC10000858 | CPSF1   | DUT          | C9orf93  | BST2    |
| FLJ23584 | GLRX5     | LOC10000858 | CRB3    | DYNC1I2      | CA5A     | BTBD10  |
| FLJ31306 | GLUD2     | LOC10012820 | CRCP    | DYNLL2       | CABP1    | BTBD11  |
| FLJ31568 | GLUL      | LOC10012868 | CRCT1   | DZIP3        | CACNA2D3 | BTBD12  |
| FLJ35429 | GMIP      | LOC10012878 | CRHR1   | EAF2         | CACNA2D4 | BTD     |



|          |          |             |          |          |         |           |
|----------|----------|-------------|----------|----------|---------|-----------|
| FLJ35776 | GNA15    | LOC10012889 | CRKRS    | EBF3     | CACNG1  | BTF3      |
| FLJ41327 | GNB1     | LOC10012990 | CROCCL2  | EBF4     | CACNG6  | BTF3L4    |
| FLJ44313 | GOSR2    | LOC10013018 | CRYAA    | EBPL     | CALY    | BTG1      |
| FLJ45422 | GP1BA    | LOC10013036 | CSAG3    | ECE2     | CAMLG   | BTN3A1    |
| FLJ45983 | GP6      | LOC10013116 | CSAG3A   | ECHDC1   | CAPG    | BTRC      |
| FLJ46552 | GP9      | LOC10013138 | CSAG3B   | ECHDC3   | CAPZB   | BUB1B     |
| FLJ90757 | GPD1L    | LOC10013164 | CSF1     | EDC3     | CARM1   | BUD31     |
| FN1      | GPD2     | LOC10013172 | CSTF2    | EDNRA    | CARS2   | BZW2      |
| FNBP1    | GPR124   | LOC10013208 | CTBP1    | EEF1A1   | CASC3   | C10orf10  |
| FNBP4    | GPR172A  | LOC10013228 | CTBS     | EEF1G    | CASP1   | C10orf125 |
| FNDC3B   | GPR180   | LOC10013228 | CTDSP2   | EFTUD2   | CASP2   | C10orf140 |
| FOXF1    | GPR34    | LOC10013239 | CTNNBL1  | EGFR     | CBX1    | C10orf32  |
| FOXR1    | GPR4     | LOC10013241 | CTNND1   | EGLN1    | CBX6    | C10orf33  |
| FOXRED1  | GPR44    | LOC10013360 | CTR9     | EGLN2    | CCDC101 | C10orf35  |
| FOXRED2  | GPR65    | LOC10013380 | CTRB1    | EHBP1    | CCDC113 | C10orf47  |
| FTO      | GPT2     | LOC10013392 | CTSK     | EHD2     | CCDC123 | C10orf54  |
| FTSJD2   | GRAP2    | LOC10013436 | CUL2     | EIF2AK3  | CCDC151 | C10orf58  |
| FUBP3    | GRASP    | LOC10013440 | CUL5     | EIF2C4   | CCDC45  | C10orf59  |
| FUCA2    | GSK3B    | LOC10017093 | CWF19L1  | EIF4EBP3 | CCDC64B | C10orf6   |
| FZD1     | GSTM2    | LOC143666   | CXCL13   | EIF4G1   | CCDC68  | C10orf75  |
| G3BP1    | GSTM5    | LOC152195   | CXCL2    | EIF5     | CCDC69  | C10orf78  |
| GABRB1   | GTSF1    | LOC220686   | CXorf12  | ELAVL1   | CCDC84  | C10orf96  |
| GABRE    | GUCY2E   | LOC283683   | CXorf40A | ELMO1    | CCL14   | C11orf52  |
| GALIG    | GYPA     | LOC283932   | CYB561D2 | EML3     | CCL15   | C11orf54  |
| GALNT1   | GYPB     | LOC285016   | CYB5RL   | ENC1     | CCL20   | C11orf58  |
| GAN      | GYPE     | LOC285296   | CYLD     | ENOX2    | CCL3    | C11orf63  |
| GAS2L3   | GZMA     | LOC285943   | CYP1A2   | ENPEP    | CCL3L1  | C11orf73  |
| GATAD2B  | GZMK     | LOC286016   | CYP2A6   | ENTPD6   | CCL3L3  | C11orf80  |
| GATS     | H2AFV    | LOC340598   | CYP2A7   | EOMES    | CCL4L1  | C11orf82  |
| GDAP1    | HABP4    | LOC345645   | CYP2B6   | EPB41L1  | CCL4L2  | C11orf9   |
| GDE1     | HAPLN4   | LOC346085   | CYP2B7P1 | EPB41L2  | CCM2    | C12orf11  |
| GDF6     | HARBI1   | LOC388312   | CYP2C18  | EPB41L3  | CCND2   | C12orf23  |
| GFM1     | HBA1     | LOC388481   | CYP2C19  | EPB41L4B | CCNF    | C12orf24  |
| GFM2     | HBA2     | LOC388556   | CYP2C9   | EPHA4    | CCNG1   | C12orf27  |
| GGA1     | HBB      | LOC389599   | CYP2D7P1 | EPPB9    | CCNI    | C12orf31  |
| GGTLC1   | HBBP1    | LOC389641   | CYP3A4   | EPR1     | CCNJL   | C12orf32  |
| GIN51    | HBD      | LOC399491   | CYP4B1   | EPS8     | CCNK    | C12orf44  |
| GIPC1    | HBE1     | LOC400558   | CYP4F11  | ERMP1    | CCNL1   | C12orf45  |
| GJA5     | HBG1     | LOC400986   | CYP4F22  | ERN1     | CCRK    | C12orf47  |
| GLB1     | HBM      | LOC401052   | CYP7A1   | ESRRG    | CCT4    | C12orf5   |
| GLI3     | HBZ      | LOC401233   | CYSLTR2  | ETS1     | CD302   | C12orf51  |
| GLS      | HCFC1    | LOC402377   | CY TSA   | ETS2     | CD58    | C12orf56  |
| GLTSCR1  | HCG27    | LOC440122   | CYYR1    | ETV6     | CD59    | C12orf60  |
| GM2A     | HDC      | LOC440157   | DACT2    | EXO1     | CD74    | C13orf15  |
| GNAS     | HDDC3    | LOC440353   | DAK      | EXOC3    | CD79A   | C13orf23  |
| GNG7     | HEBP2    | LOC440354   | DAO      | EXOSC3   | CD82    | C13orf3   |
| GOLGA3   | HEMGN    | LOC441124   | DAPK2    | EXT1     | CD86    | C13orf33  |
| GOLGA5   | HEPACAM2 | LOC441131   | DAPP1    | FABP7    | CD93    | C13orf34  |
| GOLGA7   | HES5     | LOC493754   | DARS2    | FAHD2A   | CD99L2  | C13orf37  |
| GOLGA8B  | HEXA     | LOC552889   | DAXX     | FAM101B  | CDC23   | C14orf102 |

|           |           |           |              |           |             |           |
|-----------|-----------|-----------|--------------|-----------|-------------|-----------|
| GPR101    | HEXB      | LOC641823 | DC36         | FAM102A   | CDC42EP5    | C14orf104 |
| GPR137    | HEYL      | LOC642127 | DCAF15       | FAM113B   | CDCA3       | C14orf109 |
| GPR162    | HHIP      | LOC642361 | DCAF4L1      | FAM120AOS | CDH1        | C14orf115 |
| GPR61     | HIF3A     | LOC642393 | DCBLD1       | FAM122B   | CDH13       | C14orf118 |
| GPR87     | HIST1H2BH | LOC642615 | DCLRE1A      | FAM126B   | CDH17       | C14orf129 |
| GRAMD1B   | HIST1H3F  | LOC642678 | DCLRE1B      | FAM127B   | CDK7        | C14orf139 |
| GRAMD2    | HIST1H3G  | LOC642784 | DCTN5        | FAM127C   | CDKN1A      | C14orf149 |
| GRAMD3    | HIST1H3H  | LOC642921 | DCTN6        | FAM129B   | CDKN2AIPNL  | C14orf173 |
| GRB2      | HIST1H4E  | LOC643507 | DCUN1D3      | FAM133B   | CDR2        | C14orf176 |
| GRINL1A   | HIST1H4H  | LOC643624 | DDTL         | FAM160B1  | CDX1        | C14orf37  |
| GRTP1     | HIVEP3    | LOC643668 | DDX1         | FAM172A   | CECR6       | C14orf43  |
| GRWD1     | HK3       | LOC643856 | DDX20        | FAM176B   | CELSR2      | C14orf80  |
| GTF2A2    | HLA-DQA1  | LOC643949 | DDX27        | FAM189B   | CELSR3      | C15orf23  |
| GTF2I     | HLA-DRB6  | LOC644012 | DDX42        | FAM190B   | CENPE       | C15orf27  |
| GTF3A     | HMOX2     | LOC644330 | DDX46        | FAM72D    | CENPF       | C15orf33  |
| GTF3C5    | HOXA2     | LOC644589 | DDX52        | FAM73A    | CENPJ       | C15orf57  |
| HARS2     | HOXA5     | LOC644684 | DDX55        | FAM83H    | CENTB2      | C16orf11  |
| HDAC11    | HOXD11    | LOC644774 | DDX60        | FAM86B1   | CEP152      | C16orf35  |
| HELQ      | HRAS      | LOC644860 | DEPDC1       | FAM86C    | CEP55       | C16orf48  |
| HELZ      | HSD11B2   | LOC644931 | DERPC        | FAM96A    | CEP70       | C16orf59  |
| HERV-FRD  | HSPB6     | LOC644935 | DET1         | FBXL6     | CES2        | C16orf68  |
| HES6      | HSPC159   | LOC645086 | DEXI         | FBXO32    | CES8        | C16orf74  |
| HIST1H4J  | HYOU1     | LOC645159 | DGCR11       | FBXO33    | CFH         | C16orf75  |
| HIST3H2A  | ICK       | LOC645233 | DGUOK        | FBXO5     | CFHR1       | C17orf100 |
| HLA-A29.1 | IFI44L    | LOC645367 | DHDH         | FBXW8     | CFHR2       | C17orf53  |
| HNRNPA3P1 | IFIT1L    | LOC645558 | DHRSX        | FCAR      | CFI         | C17orf58  |
| HNRPK     | IFT20     | LOC645733 | DHX34        | FER1L4    | CHAF1B      | C17orf59  |
| HOOK3     | IFT74     | LOC645969 | DHX57        | FGFR1OP2  | CHD3        | C17orf61  |
| HOXB3     | IGLL1     | LOC647009 | DHX58        | FGFR3     | CHD7        | C17orf63  |
| HOXB4     | IGLL3     | LOC647012 | DIRAS3       | FGFRL1    | CHES1       | C17orf68  |
| HOXB7     | IGSF6     | LOC647081 | DIS3         | FHL1      | CHFR        | C17orf69  |
| HOXC4     | IGSF9B    | LOC647340 | DIS3L2       | FICD      | CHIC2       | C17orf80  |
| HOXC8     | IKZF1     | LOC647349 | DKFZp434K19  | FIGNL1    | CHMP4C      | C17orf91  |
| HS2ST1    | IL10RA    | LOC648024 | DKFZp434M1:  | FILIP1L   | CHP         | C17orf93  |
| HS3ST1    | IL13RA2   | LOC648434 | DKFZp451M2:  | FKBP5     | CHRFAM7A    | C17orf95  |
| HSPB1     | IL21R     | LOC648476 | DKFZp686I15: | FLJ10213  | CHRM3       | C17orf96  |
| HSD3B1    | IL2RB     | LOC648608 | DKFZp686K16  | FLJ10374  | CHST13      | C18orf26  |
| HSPB2     | IL33      | LOC648984 | DKFZp686O24  | FLJ10986  | CHST15      | C19orf12  |
| HSPB7     | IL7R      | LOC649841 | DKFZP779L18: | FLJ11783  | CHSY1       | C19orf2   |
| HSPG2     | IL8RB     | LOC650020 | DKFZp779M0:  | FLJ14213  | CHTF18      | C19orf4   |
| HTR1E     | IL8RBP    | LOC650128 | DMAP1        | FLJ20021  | CHURC1      | C19orf48  |
| HTRA4     | IMPA1     | LOC650515 | DMXL2        | FLJ21839  | CICK0721Q.1 | C19orf54  |
| HTT       | ING1      | LOC651143 | DNAJB4       | FLJ35220  | CLCC1       | C19orf56  |
| HYAL2     | INSC      | LOC651309 | DNAJC1       | FLJ35801  | CLCF1       | C19orf6   |
| IAPP      | INTS10    | LOC652595 | DNAJC27      | FLJ41484  | CLCN5       | C19orf66  |
| IDH3B     | IP6K3     | LOC652676 | DNCL1        | FLJ44124  | CLDN3       | C19orf70  |
| IGF2AS    | ISG15     | LOC652755 | DNM3         | FLJ45032  | CLDN5       | C1orf104  |
| IGF2R     | ITGA2B    | LOC652826 | DNMT1        | FLJ46309  | CLDN7       | C1orf106  |
| IHH       | ITGA4     | LOC652903 | DNPEP        | FNDC3A    | CLDND1      | C1orf115  |
| IKBIP     | ITGAD     | LOC653108 | DOCK7        | FOXN4     | CLEC11A     | C1orf122  |

|           |           |           |         |         |          |          |
|-----------|-----------|-----------|---------|---------|----------|----------|
| IL17C     | ITGB3     | LOC653171 | DPF1    | FOXP4   | CLRN3    | C1orf133 |
| ILDR2     | ITLN1     | LOC653308 | DSEL    | FREM1   | CMBL     | C1orf135 |
| INHA      | ITPK1     | LOC653496 | DSG1    | FRZB    | CMTM7    | C1orf156 |
| INMT      | KCNK1     | LOC653764 | DUS2L   | FSIP1   | CMTM8    | C1orf163 |
| INPP5E    | KCNK4     | LOC653930 | DUXA    | FSTL3   | CNIH2    | C1orf182 |
| INPP5K    | KCNMB1    | LOC727773 | DUXAP3  | FTHL7   | CNO      | C1orf187 |
| INSL4     | KCNU1     | LOC728098 | DYM     | FUT6    | CNOT1    | C1orf188 |
| INSM1     | KEL       | LOC728188 | DYNLL1  | FXR2    | CNOT3    | C1orf19  |
| INVS      | KIAA0240  | LOC728428 | DYNLT3  | FXD6    | CNOT6    | C1orf203 |
| IRAK1     | KIAA0319L | LOC728484 | DYSFIP1 | FYTTD1  | COIL     | C1orf218 |
| IRF3      | KIAA0649  | LOC728537 | EAF1    | FZD9    | COL11A1  | C1orf24  |
| ISM2      | KIAA0748  | LOC728661 | EDAR    | GALK2   | COL17A1  | C1orf51  |
| ITGA11    | KIAA0831  | LOC728844 | EDF1    | GALNS   | COL27A1  | C1orf57  |
| ITGA8     | KIAA0895L | LOC728855 | EEF2K   | GALNT11 | COL7A1   | C1orf61  |
| ITGB6     | KIAA1383  | LOC729004 | EFHD1   | GALNT6  | COL9A2   | C1orf63  |
| ITIH5     | KIAA1409  | LOC729231 | EGFL6   | GALNTL4 | COL9A3   | C1orf74  |
| ITPA      | KIAA1571  | LOC729298 | EGOT    | GAS1    | COLEC11  | C1orf86  |
| JMJD2A    | KIAA1737  | LOC729581 | EHMT2   | GATA2   | COMMD2   | C1orf88  |
| KANK3     | KIAA1908  | LOC729602 | EID3    | GATA6   | COMT     | C1orf94  |
| KATNB1    | KIF6      | LOC729680 | EIF1AD  | GBA2    | COPG2    | C1orf97  |
| KAZALD1   | KIFC3     | LOC729841 | EIF2AK2 | GCC1    | COPS7B   | C1QBP    |
| KBTBD10   | KIR2DS5   | LOC729858 | EIF2AK4 | GCM1    | COPZ1    | C1QL1    |
| KBTBD2    | KIR3DL1   | LOC730012 | EIF2B5  | GCSH    | COQ9     | C1QL4    |
| KCNJ13    | KIR3DL2   | LOC730052 | EIF2C1  | GINS2   | CORO1B   | C1QTNF6  |
| KCNK13    | KISS1R    | LOC730153 | EIF2S1  | GINS3   | CORO2A   | C1R      |
| KCNK17    | KLF1      | LOC730273 | EIF3D   | GJB6    | COX10    | C1RL     |
| KCNK9     | KLK1      | LOC731878 | EIF4B   | GLDN    | COX11P   | C1S      |
| KCNQ10T1  | KLK10     | LOC732007 | ELAC1   | GLE1    | COX17    | C2orf100 |
| KCNQ4     | KLRB1     | LOC732165 | ELMOD3  | GLO1    | COX6A2   | C2orf103 |
| KCTD20    | KPNA4     | LOC732360 | ELOVL6  | GMNN    | COX7A1   | C2orf108 |
| KCTD6     | KPTN      | LOC732425 | EML4    | GMPS    | COX7B    | C2orf199 |
| KIAA0040  | KRT1      | LOC88523  | ENDOG   | GNB4    | COX8A    | C2orf201 |
| KIAA0100  | KRT13     | LOC91316  | ENTPD7  | GNPAT   | CP       | C2orf29  |
| KIAA0182  | KRT6C     | LOC96610  | ENTPD8  | GOLGA8A | CP110    | C2orf3   |
| KIAA0195  | L3MBTL2   | LPPR4     | EP300   | GOLGB1  | CPB2     | C2orf46  |
| KIAA0460  | LAT       | LRFN3     | EPC1    | GON4L   | CPEB2    | C2orf52  |
| KIAA0556  | LCE1E     | LRRC17    | EPHA3   | GORASP1 | CPEB3    | C2orf55  |
| KIAA0753  | LCN1L1    | LRRC2     | EPHA6   | GOT1    | CPEB4    | C2orf56  |
| KIAA1024  | LDHAL6A   | LRRC23    | EPHB4   | GPR125  | CPSF3    | C2orf72  |
| KIAA1045  | LGALS14   | LRRC34    | EPN2    | GPR137B | CPSF3L   | C2orf75  |
| KIAA1107  | LGALS9    | LRRC38    | EPS15L1 | GPR89B  | CPSF4    | C2orf45  |
| KIAA1199  | LHX2      | LTV1      | ERLIN2  | GPR89C  | CPT2     | C2orf51  |
| KIAA1202  | LHX4      | LY6H      | ERO1LB  | GPRASP2 | CPVL     | C2orf58  |
| KIAA1407  | LILRA2    | LYPLAL1   | ERRFI1  | GPRC5C  | CREB3    | C2orf63  |
| KIAA1429  | LILRA3    | LYST      | ESM1    | GPSM3   | CREBZF   | C2orf70  |
| KIAA1522  | LILRA5    | MAF1      | ESPNL   | GPX1    | CRHBP    | C2orf13  |
| KIAA1549  | LILRA6    | MAGED1    | ESR1    | GRAMD4  | CRIM1    | C2orf25  |
| KIAA1772  | LILRB2    | MAGEH1    | ESRRA   | GREM2   | CRIP2    | C2CD2    |
| KIDINS220 | LILRB4    | MAK16     | ESRRAP2 | GRHL1   | CRISPLD1 | C2orf15  |
| KIF26B    | LILRB5    | MANSC1    | ESYT1   | GRM2    | CRLF3    | C2orf25  |

|             |             |           |          |           |           |          |
|-------------|-------------|-----------|----------|-----------|-----------|----------|
| KLHDC4      | LOC10012792 | MAP3K13   | ETFA     | GRM3      | CRLS1     | C2orf28  |
| KLHL24      | LOC10012795 | MAP3K9    | ETHE1    | GRPEL1    | CROCC     | C2orf34  |
| KLHL26      | LOC10012818 | MAP7D3    | ETV2     | GSC       | CRP       | C2orf56  |
| KLK11       | LOC10012848 | MAPK6     | EVI5     | GSTA4     | CRYGS     | C2orf65  |
| KLK3        | LOC10012854 | MAPK7     | EVI5L    | GTF2H5    | CS        | C2orf68  |
| KLK7        | LOC10012869 | MAPK8IP1  | EXOC8    | GTF2IRD2B | CSDC2     | C2orf82  |
| KLK8        | LOC10012874 | MARS2     | EXOSC10  | GTF3C1    | CSHL1     | C3orf10  |
| KRBA2       | LOC10012890 | MCAM      | EXOSC6   | GVIN1     | CSNK1A1L  | C3orf14  |
| KRT17P3     | LOC10012897 | MCTS1     | F2RL3    | H1FO      | CSNK1G3   | C3orf23  |
| KRT18P19    | LOC10012900 | MDH1      | FAAH     | H2AFZ     | CSNK2A2   | C3orf26  |
| KRT18P26    | LOC10012909 | MECP2     | FADS3    | HARS      | CSRNP2    | C3orf38  |
| KRT18P30    | LOC10012911 | MED10     | FAM100A  | HAT1      | CSRP1     | C3orf64  |
| KRT18P34    | LOC10012920 | MED12     | FAM102B  | HDAC7     | CSRP2BP   | C3orf67  |
| KRT20       | LOC10012953 | MEIS1     | FAM103A1 | HDAC7A    | CTDSPL2   | C3orf71  |
| KRT23       | LOC10012965 | MEIS2     | FAM114A1 | HDHD2     | CTNNB1    | C3orf72  |
| KRTAP10-5   | LOC10012967 | MERTK     | FAM115A  | HEATR2    | CTNND2    | C3orf75  |
| KRTAP19-6   | LOC10012975 | MESDC1    | FAM118B  | HEATR3    | CTSD      | C4orf18  |
| KRTAP21-1   | LOC10013000 | METTLL11A | FAM128A  | HEATR5B   | CTSS      | C4orf19  |
| KRTAP21-2   | LOC10013025 | METTLL11B | FAM139A  | HECA      | CTTNBP2NL | C4orf27  |
| KSR1        | LOC10013031 | MEX3A     | FAM153B  | HEG1      | CTU2      | C4orf43  |
| LAG3        | LOC10013049 | MFSD6     | FAM164C  | HERPUD1   | CWF19L2   | C4orf46  |
| LARP4B      | LOC10013055 | MGC3032   | FAM174A  | HEY1      | CX3CL1    | C4orf51  |
| LASP1       | LOC10013059 | MGC3731   | FAM175A  | HHAT      | CXCL10    | C5       |
| LDHC        | LOC10013074 | MGC45491  | FAM186B  | HHLA1     | CXCL16    | C5orf28  |
| LGALS13     | LOC10013082 | MGC5457   | FAM18B   | HIAT1     | CXorf23   | C5orf34  |
| LGALS3      | LOC10013085 | MGP       | FAM19A4  | HIATL2    | CXorf45   | C5orf37  |
| LHB         | LOC10013085 | MIB2      | FAM21C   | HIF1AN    | CYB5A     | C5orf4   |
| LHFP        | LOC10013116 | MICALL1   | FAM40B   | HIGD1A    | CYBA      | C5orf41  |
| LIG4        | LOC10013124 | MIR155HG  | FAM43A   | HIP1R     | CYBASC3   | C5orf42  |
| LIMA1       | LOC10013133 | MIR9-1    | FAM45B   | HIST1H1D  | CYLN2     | C5orf44  |
| LIMCH1      | LOC10013139 | MLF2      | FAM58A   | HLA-A     | CYP21A2   | C5orf62  |
| LMAN2L      | LOC10013171 | MLL5      | FAM59A   | HLA-H     | CYP26B1   | C6orf117 |
| LMO1        | LOC10013172 | MMP11     | FAM59B   | HLTF      | CYP2D6    | C6orf125 |
| LMOD1       | LOC10013173 | MPDZ      | FAM69B   | HM13      | CYP2E1    | C6orf126 |
| LNX1        | LOC10013190 | MPHOSPH6  | FAM76B   | HMGB1L1   | CYP2R1    | C6orf129 |
| LOC10012805 | LOC10013214 | MRPL21    | FAM91A1  | HMGB2     | CYP39A1   | C6orf148 |
| LOC10012823 | LOC10013224 | MRPL44    | FAM96B   | HMMR      | CYP3A43   | C6orf160 |
| LOC10012847 | LOC10013245 | MRPL55    | FAM98A   | HNRNPD    | CYP3A5    | C6orf168 |
| LOC10012856 | LOC10013249 | MRPS15    | FANCA    | HNRNPH1   | CYP4A11   | C6orf170 |
| LOC10012859 | LOC10013250 | MRPS30    | FANCG    | HNRNPH2   | CYP4A22   | C6orf204 |
| LOC10012864 | LOC10013270 | MRPS34    | FANCI    | HNRNPK    | CYP4F12   | C6orf211 |
| LOC10012899 | LOC10013274 | MSTO1     | FASTKD5  | HNRNPUL1  | CYP4F2    | C6orf48  |
| LOC10012919 | LOC10013276 | MSX1      | FBLN2    | HNRPH1    | CYP4F3    | C6orf54  |
| LOC10012954 | LOC10013281 | MTF1      | FBXL15   | HNRPUL1   | CYP4V2    | C6orf57  |
| LOC10012955 | LOC10013296 | MTFMT     | FBXL19   | HOXB2     | CYP8B1    | C6orf59  |
| LOC10012956 | LOC10013297 | MTMR12    | FBXL5    | HOXC13    | D4S234E   | C6orf66  |
| LOC10012962 | LOC10013303 | MUSTN1    | FBXL7    | HOXC6     | DACT1     | C6orf89  |
| LOC10012967 | LOC10013307 | MYADM     | FBXO10   | HS1BP3    | DAD1L     | C7orf10  |
| LOC10012984 | LOC10013327 | MYCL1     | FBXO15   | HSD17B6   | DAPK3     | C7orf20  |
| LOC10012995 | LOC10013343 | MYCT1     | FBXO25   | HSD17B7   | DAZL      | C7orf28A |

|             |             |            |          |          |            |          |
|-------------|-------------|------------|----------|----------|------------|----------|
| LOC10012997 | LOC10013343 | MYL1       | FBXO42   | HSDL2    | DBH        | C7orf28B |
| LOC10012998 | LOC10013345 | MYLK4      | FBXO46   | HSN2     | DBN1       | C7orf40  |
| LOC10013030 | LOC10013347 | MYO9B      | FCAMR    | HSPA12A  | DCAF16     | C7orf41  |
| LOC10013045 | LOC10013350 | N4BP2L2    | FCF1     | HSPC171  | DCBLD2     | C7orf44  |
| LOC10013079 | LOC10013354 | NAB1       | FER1L5   | HSPCAL3  | DCP1B      | C7orf46  |
| LOC10013083 | LOC10013356 | NARF       | FGF6     | HSPD1    | DCP2       | C7orf50  |
| LOC10013090 | LOC10013367 | NARG1      | FGF9     | HSZFP36  | DCTN2      | C7orf54  |
| LOC10013104 | LOC10013377 | NAT13      | FHOD1    | HUWE1    | DCUN1D4    | C7orf57  |
| LOC10013116 | LOC10013388 | NCK1       | FIGN     | HVCN1    | DCXR       | C7orf70  |
| LOC10013119 | LOC10013400 | NCOA1      | FIS      | HYDIN    | DDO        | C8orf13  |
| LOC10013125 | LOC10013410 | NCOA6IP    | FIZ1     | ICMT     | DDR GK1    | C8orf4   |
| LOC10013128 | LOC10013427 | NCRNA00152 | FKTN     | ID3      | DDT        | C8orf55  |
| LOC10013129 | LOC10013429 | NECAB2     | FLJ11292 | IDH1     | DDX26B     | C8orf58  |
| LOC10013133 | LOC10013436 | NECAP2     | FLJ12949 | IER5L    | DDX50      | C8orf59  |
| LOC10013147 | LOC10019237 | NGDN       | FLJ16793 | IFFO1    | DDX51      | C8ORFK29 |
| LOC10013167 | LOC10019237 | NICN1      | FLJ20397 | IFIT3    | DDX54      | C9orf103 |
| LOC10013173 | LOC113386   | NIN        | FLJ20581 | IFRD2    | DDX56      | C9orf125 |
| LOC10013181 | LOC124216   | NMB        | FLJ21687 | IFT140   | DDX59      | C9orf129 |
| LOC10013219 | LOC133491   | NMD3       | FLJ25363 | IFT52    | DDX6       | C9orf135 |
| LOC10013221 | LOC138652   | NMNAT3     | FLJ32011 | IGF1     | DECR2      | C9orf140 |
| LOC10013229 | LOC142937   | NOB1       | FLJ32810 | IGFBP5   | DEDD2      | C9orf3   |
| LOC10013267 | LOC151457   | NOSTRIN    | FLJ34047 | IGSF21   | DENND2D    | C9orf40  |
| LOC10013300 | LOC153684   | NPC2       | FLJ35390 | IL17D    | DENND4A    | C9orf46  |
| LOC10013301 | LOC200493   | NPEPL1     | FLJ35785 | IL17RC   | DGAT2      | C9orf58  |
| LOC10013311 | LOC201229   | NQO2       | FLJ38379 | IL28RA   | DGKA       | C9orf61  |
| LOC10013317 | LOC201651   | NSUN4      | FLJ40330 | IL4R     | DGKQ       | C9orf72  |
| LOC10013319 | LOC282997   | NT5C3      | FLJ40722 | IL8      | DHRS1      | C9orf80  |
| LOC10013339 | LOC285033   | NUDCD3     | FLJ42289 | IMMP2L   | DHRS12     | C9orf85  |
| LOC10013355 | LOC285741   | NUDT5      | FLJ42709 | IMP4     | DHRS4L1    | C9orf95  |
| LOC10013369 | LOC345630   | NUMA1      | FLJ44054 | INO80C   | DHRS7      | CA10     |
| LOC10013371 | LOC347364   | OAZ2       | FLJ45513 | INPP5D   | DHRS9      | CA11     |
| LOC10013391 | LOC347376   | OGFOD1     | FLJ45966 | INTS4    | DHX33      | CA12     |
| LOC10013425 | LOC389102   | OLFML1     | FN3KRP   | INTS5    | DHX35      | CA14     |
| LOC10013454 | LOC390712   | OLIG2      | FNDC4    | INTS6    | DHX36      | CA2      |
| LOC10013458 | LOC390876   | ONECUT1    | FNIP2    | IPP      | DIP2A      | CA4      |
| LOC10014460 | LOC391692   | OR4K13     | FNTB     | IRAK3    | DKFZp667M2 | CABLES2  |
| LOC10019093 | LOC400236   | OSBPL9     | FOSL2    | IRF2BP1  | DKKL1      | CABYR    |
| LOC128192   | LOC400879   | OXSRI      | FOX D2   | IRS1     | DLAT       | CACHD1   |
| LOC132241   | LOC401002   | P704P      | FOX H1   | IRX6     | DLG4       | CACNA1H  |
| LOC137107   | LOC401010   | PAFAH1B2   | FOX J1   | ISCA1    | DLL1       | CACNA2D2 |
| LOC146517   | LOC401076   | PALLD      | FPGS     | ISCA2    | DMGDH      | CACNB2   |
| LOC154761   | LOC401237   | PAQR7      | FRAG1    | ISM1     | DMRT2      | CACNB3   |
| LOC162073   | LOC440509   | PAR D6A    | FRRS1    | ISY1     | DMTF1      | CAD      |
| LOC202051   | LOC440570   | PCBP4      | FRY      | ITGAE    | DNA2       | CADM1    |
| LOC221442   | LOC440900   | PCDH17     | FTH1     | ITGB4BP  | DNAJB1     | CALB2    |
| LOC257396   | LOC441007   | PCDHGB6    | FTHL3    | ITPKC    | DNAJB5     | CALCB    |
| LOC25845    | LOC441018   | PCK2       | FTHL8    | ITPRIPL2 | DNAJC10    | CALCOCO1 |
| LOC283874   | LOC441081   | PCMTD1     | FTSJ2    | IVD      | DNAJC8     | CALCOCO2 |
| LOC283953   | LOC441191   | PCNT       | FUNDC1   | JARID1D  | DNAJC9     | CALM1    |
| LOC284371   | LOC441212   | PEG3       | FUT5     | JMJD1A   | DNAL1      | CALML4   |

|           |           |          |         |          |         |           |
|-----------|-----------|----------|---------|----------|---------|-----------|
| LOC285047 | LOC441253 | PELI2    | FXC1    | JMJD8    | DNAL4   | CALR      |
| LOC340529 | LOC441455 | PFKFB4   | FZD5    | JUND     | DNASE2  | CALU      |
| LOC341457 | LOC441528 | PGAM1    | GAGE5   | KANK1    | DNM1    | CAMK1     |
| LOC341784 | LOC441714 | PGGT1B   | GAK     | KBTBD11  | DNM1L   | CAMK2G    |
| LOC347292 | LOC441743 | PGM5     | GALNT13 | KBTBD8   | DNTTIP1 | CAMK2N1   |
| LOC387723 | LOC441763 | PHYHIPL  | GALNT3  | KCNE1L   | DNTTIP2 | CAMK2N2   |
| LOC387856 | LOC442229 | PIK3R2   | GARNL3  | KCNJ2    | DOCK11  | CAMKV     |
| LOC389000 | LOC442366 | PILRA    | GBAP    | KCNK6    | DPYD    | CAMSAP1L1 |
| LOC389322 | LOC541471 | PLAC8    | GBE1    | KCNMB3   | DPYSL2  | CAND2     |
| LOC389332 | LOC606724 | PLAGL1   | GBP3    | KCTD10   | DPYSL3  | CAPN12    |
| LOC389342 | LOC641705 | PLCD3    | GBP7    | KCTD13   | DR1     | CAPN13    |
| LOC389901 | LOC641804 | PLEKHB2  | GCET2   | KCTD2    | DRD4    | CAPN3     |
| LOC390372 | LOC641992 | PLEKHG3  | GCN1L1  | KDELC2   | DRG2    | CAPRIN1   |
| LOC391019 | LOC642073 | PLEKHH3  | GDA     | KDELR3   | DSG2    | CAPRIN2   |
| LOC391811 | LOC642580 | PLSCR1   | GDI2    | KDM6B    | DSN1    | CAPZA2    |
| LOC392382 | LOC642621 | PLXNA2   | GDPD4   | KDSR     | DSTN    | CARD10    |
| LOC400455 | LOC642732 | PLXNB3   | GGA3    | KIAA0284 | DSTYK   | CARD11    |
| LOC400831 | LOC642933 | PMS2L4   | GHITM   | KIAA0355 | DTX1    | CARD8     |
| LOC400890 | LOC642953 | PMS2L5   | GIYD2   | KIAA0408 | DTX3    | CARS      |
| LOC400968 | LOC643008 | PNO1     | GJB3    | KIAA0415 | DUOX1   | CART1     |
| LOC401238 | LOC643792 | POLR2J   | GJB7    | KIAA0513 | DUS4L   | CASK      |
| LOC401533 | LOC643872 | POSTN    | GK5     | KIAA0564 | DUSP10  | CASP3     |
| LOC402644 | LOC644399 | PPA1     | GLB1L   | KIAA1128 | DUSP16  | CASP4     |
| LOC440978 | LOC644544 | PPARGC1B | GLG1    | KIAA1257 | DUX4    | CASP6     |
| LOC441050 | LOC644596 | PPFIA1   | GLOD4   | KIAA1530 | DYNC1I1 | CASP7     |
| LOC441073 | LOC644624 | PPIA     | GLOD5   | KIAA1600 | DYNC2H1 | CAST      |
| LOC441155 | LOC644632 | PPME1    | GLRB    | KIAA1602 | DYRK3   | CAT       |
| LOC441193 | LOC644830 | PPP1R12B | GLT1D1  | KIAA1632 | E2F2    | CAV2      |
| LOC441241 | LOC644869 | PPP1R13L | GLTSCR2 | KIAA1731 | EARS2   | CBARA1    |
| LOC442249 | LOC644884 | PPP1R2   | GMCL1   | KIAA1751 | EBI2    | CBL       |
| LOC641727 | LOC644937 | PPP1R3E  | GMEB1   | KIAA2013 | EBP     | CBLC      |
| LOC641746 | LOC645038 | PPP2R1B  | GMEB2   | KIF16B   | ECHS1   | CBR1      |
| LOC641750 | LOC645276 | PPRC1    | GNAL    | KIF21A   | ECM2    | CBR3      |
| LOC641844 | LOC645284 | PPT2     | GNB5    | KIF21B   | ECT2    | CBX2      |
| LOC641922 | LOC645314 | PRAMEF1  | GNG2    | KIF23    | EDA2R   | CBX4      |
| LOC642062 | LOC645534 | PRDX4    | GNPNAT1 | KIF27    | EDARADD | CBX7      |
| LOC642250 | LOC645626 | PRKD1    | GOLGA9P | KIF2C    | EDEM2   | CCBE1     |
| LOC642333 | LOC645661 | PRNP     | GOLPH3L | KIF3B    | EEF2    | CCBL2     |
| LOC642412 | LOC645732 | PRO0628  | GOSR1   | KLF11    | EEDP1   | CCBP2     |
| LOC642443 | LOC646278 | PROK1    | GPATCH3 | KLF15    | EFEMP2  | CCDC102A  |
| LOC642446 | LOC646301 | PRR13    | GPATCH8 | KLF6     | EFHC1   | CCDC109A  |
| LOC642456 | LOC646345 | PRR7     | GPD1    | KLF9     | EFNA4   | CCDC109B  |
| LOC642486 | LOC646561 | PRRG1    | GPHN    | KLHL28   | EGF     | CCDC112   |
| LOC642639 | LOC646562 | PRSS35   | GPLD1   | KLHL3    | EHBP1L1 | CCDC120   |
| LOC642989 | LOC646609 | PSG2     | GPR1    | KLHL9    | EID2    | CCDC126   |
| LOC643007 | LOC646734 | PSG4     | GPR137C | KRT18P42 | EID2B   | CCDC136   |
| LOC643018 | LOC647054 | PSG6     | GPR141  | KRT8     | EIF1    | CCDC138   |
| LOC643035 | LOC647074 | PSG7     | GPR88   | KRT80    | EIF2A   | CCDC152   |
| LOC643109 | LOC647195 | PSMA1    | GPS1    | LACTB    | EIF2B2  | CCDC18    |
| LOC643123 | LOC647251 | PSMA6    | GPSM2   | LACTB2   | EIF3E   | CCDC28B   |

|           |           |           |           |             |        |          |
|-----------|-----------|-----------|-----------|-------------|--------|----------|
| LOC643224 | LOC647506 | PSMC1     | GPX4      | LAGE3       | EIF3F  | CCDC34   |
| LOC643300 | LOC647543 | PSMD11    | GPX7      | LAMB1       | EIF3H  | CCDC4    |
| LOC643310 | LOC647579 | PTGS1     | GRAMD1C   | LAMB2L      | EIF3L  | CCDC41   |
| LOC643384 | LOC647597 | PTPLAD1   | GRIPAP1   | LAP3        | EIF4A2 | CCDC43   |
| LOC643389 | LOC647673 | PTPN21    | GRK4      | LASS6       | EIF4A3 | CCDC5    |
| LOC643401 | LOC647742 | PTTG1IP   | GRK6      | LEMD3       | EIF4G3 | CCDC50   |
| LOC643550 | LOC647747 | PURA      | GRN       | LGALS1      | ELK4   | CCDC51   |
| LOC643605 | LOC647805 | PUS3      | GSDM1     | LHFPL2      | ELMO3  | CCDC56   |
| LOC643802 | LOC647855 | PYGB      | GSTT2B    | LHPP        | ELOVL2 | CCDC58   |
| LOC643985 | LOC648294 | PYROXD1   | GSTTP2    | LINGO1      | ELOVL4 | CCDC59   |
| LOC644019 | LOC648470 | RAB11FIP4 | GTDC1     | LMAN1       | ELP2   | CCDC74A  |
| LOC644063 | LOC648581 | RABEPK    | GTF2A1    | LMNB1       | EME1   | CCDC77   |
| LOC644092 | LOC648705 | RAD21     | GTPBP10   | LMOD3       | EMID2  | CCDC90B  |
| LOC644101 | LOC649396 | RAE1      | GTSE1     | LNPEP       | EMP3   | CCDC91   |
| LOC644113 | LOC649978 | RALB      | GUCA2B    | LOC10012789 | EMX2OS | CCDC92   |
| LOC644276 | LOC650494 | RAP1A     | GUSBL1    | LOC10012797 | ENHO   | CCDC99   |
| LOC644284 | LOC650509 | RAP2C     | GYLTL1B   | LOC10012800 | ENOSF1 | CCHCR1   |
| LOC644334 | LOC650518 | RAPGEF6   | GZF1      | LOC10012809 | ENPP3  | CCKBR    |
| LOC644496 | LOC650566 | RAVER1    | HACE1     | LOC10012812 | ENPP4  | CCL26    |
| LOC644563 | LOC650717 | RBBP5     | HAS2AS    | LOC10012828 | ENPP5  | CCL5     |
| LOC644580 | LOC650850 | RBM23     | HAUS5     | LOC10012829 | ENPP7  | CCNA1    |
| LOC644612 | LOC651380 | RBM33     | HCCS      | LOC10012854 | EPB49  | CCNA2    |
| LOC644615 | LOC651635 | RBM4      | HCG4      | LOC10012858 | EPCAM  | CCNB1IP1 |
| LOC644634 | LOC651751 | RBM45     | HDAC1     | LOC10012888 | EPHA8  | CCNB2    |
| LOC644701 | LOC651959 | RBM7      | HDAC3     | LOC10012907 | EPHX1  | CCNC     |
| LOC644988 | LOC651979 | RCHY1     | HEATR5A   | LOC10012908 | EPHX2  | CCND3    |
| LOC645181 | LOC651997 | RELN      | HECTD3    | LOC10012910 | EPRS   | CCNE1    |
| LOC645231 | LOC652140 | RET       | HEPACAM   | LOC10012912 | EPS15  | CCNJ     |
| LOC645241 | LOC652183 | RFNG      | HERC2     | LOC10012921 | ERAP2  | CCPG1    |
| LOC645332 | LOC652346 | RFX5      | HERPUD2   | LOC10012926 | ERC2   | CCS      |
| LOC645378 | LOC652437 | RGL3      | HGS       | LOC10012926 | ERCC2  | CCT2     |
| LOC645515 | LOC652479 | RHBDL1    | HIBADH    | LOC10012929 | ERLIN1 | CCT3     |
| LOC645550 | LOC652534 | RHEB      | HINFP     | LOC10012936 | ERMAP  | CCT6A    |
| LOC645600 | LOC652630 | RHOQ      | HIST1H3A  | LOC10012950 | ESPN   | CCT6P1   |
| LOC645837 | LOC652679 | RNASE1    | HIST1H3D  | LOC10012953 | ETF1   | CCT7     |
| LOC645963 | LOC652839 | RNASE6    | HIST1H3E  | LOC10012955 | ETFDH  | CD14     |
| LOC646144 | LOC653276 | RNASEH1   | HIST2H4A  | LOC10012960 | EVC2   | CD151    |
| LOC646567 | LOC653468 | RNASEH2C  | HIT-40    | LOC10012966 | EVI2B  | CD163    |
| LOC646779 | LOC653600 | RNASEL    | HIVEP2    | LOC10012972 | EVL    | CD164    |
| LOC646786 | LOC653657 | RNF130    | HJURP     | LOC10012975 | EXD2   | CD19     |
| LOC647174 | LOC653895 | RNF138    | HK1       | LOC10013009 | EXOC1  | CD200    |
| LOC647262 | LOC654078 | RNF167    | HLA-C     | LOC10013015 | EXOC2  | CD24     |
| LOC647264 | LOC654126 | RNF4      | HLA-G     | LOC10013022 | EXOC4  | CD248    |
| LOC647346 | LOC654127 | RNPEP     | HLCS      | LOC10013027 | EXT2   | CD2AP    |
| LOC647474 | LOC654201 | RNU1G2    | HMGB1     | LOC10013051 | EXTL2  | CD34     |
| LOC647949 | LOC654253 | RPF1      | HMGB3L1   | LOC10013055 | F11    | CD36     |
| LOC648025 | LOC727751 | RPL23AP13 | HMHA1     | LOC10013056 | F13B   | CD47     |
| LOC648293 | LOC727877 | RRAGB     | HNF4A     | LOC10013062 | F2     | CD68     |
| LOC648342 | LOC727913 | RRN3      | HNRNPA2B1 | LOC10013070 | F5     | CD70     |
| LOC648366 | LOC727914 | RRP12     | HNRNPF    | LOC10013080 | F8     | CD79B    |

|           |           |           |           |                      |          |
|-----------|-----------|-----------|-----------|----------------------|----------|
| LOC648377 | LOC728190 | RRS1      | HNRNPR    | LOC10013083 F8A1     | CD8A     |
| LOC648570 | LOC728351 | RSBN1     | HNRPR     | LOC10013088 F9       | CD9      |
| LOC648622 | LOC728453 | RTF1      | HNRPUL2   | LOC10013089 FA2H     | CD99     |
| LOC648814 | LOC728556 | RTN2      | HOXA9     | LOC10013109 FABP1    | CDAN1    |
| LOC648907 | LOC728608 | RUFY3     | HPDL      | LOC10013154 FADS1    | CDC123   |
| LOC649379 | LOC728758 | RXRB      | HPS4      | LOC10013178 FADS2    | CDC16    |
| LOC649946 | LOC728772 | S100Z     | HRCT1     | LOC10013185 FAHD1    | CDC25C   |
| LOC650116 | LOC728888 | SAC3D1    | HSD11B1   | LOC10013189 FALZ     | CDC2L5   |
| LOC650144 | LOC728934 | SALL1     | HSD11B1L  | LOC10013244 FAM104A  | CDC42    |
| LOC650251 | LOC728942 | SCMH1     | HSD17B12  | LOC10013249 FAM105B  | CDC42BPA |
| LOC650263 | LOC728944 | SCYL1BP1  | HSD17B13  | LOC10013250 FAM108A3 | CDC42EP4 |
| LOC650562 | LOC728946 | SDCCAG3   | HSD17B7P2 | LOC10013265 FAM108C1 | CDC42SE1 |
| LOC650580 | LOC728953 | SEC16A    | HSF2BP    | LOC10013271 FAM114A2 | CDC7     |
| LOC650706 | LOC728965 | SEC24C    | HSF4      | LOC10013271 FAM116B  | CDCA4    |
| LOC650867 | LOC729123 | SEH1L     | HSPA1L    | LOC10013274 FAM120A  | CDCA5    |
| LOC650885 | LOC729148 | SEMA4F    | HSPA7     | LOC10013311 FAM125A  | CDCA7    |
| LOC651102 | LOC729200 | SEMA5A    | HSPE1     | LOC10013348 FAM134C  | CDCA7L   |
| LOC651450 | LOC729234 | SENP2     | HTR2B     | LOC10013351 FAM135A  | CDCP1    |
| LOC652045 | LOC729486 | SERPINB9  | HYI       | LOC10013358 FAM14B   | CDH23    |
| LOC652481 | LOC729519 | SESN2     | IARS2     | LOC10013366 FAM162A  | CDH26    |
| LOC652607 | LOC729558 | SESN3     | IBTK      | LOC10013381 FAM173A  | CDH3     |
| LOC652634 | LOC729768 | SETD4     | ICAM1     | LOC10013386 FAM184A  | CDH4     |
| LOC652674 | LOC729792 | SETMAR    | ICOSLG    | LOC10013399 FAM195B  | CDK2AP1  |
| LOC652685 | LOC729799 | SEZ6      | IDO2      | LOC10013424 FAM30A   | CDK2AP2  |
| LOC652688 | LOC729870 | SF3B1     | IDUA      | LOC10013442 FAM36A   | CDK5RAP1 |
| LOC652713 | LOC730378 | SFRS12IP1 | IFFO2     | LOC10013450 FAM3B    | CDK5RAP2 |
| LOC652798 | LOC730382 | SFRS13A   | IFIT5     | LOC10013479 FAM45A   | CDK5RAP3 |
| LOC652846 | LOC730415 | SFRS2IP   | IFNGR1    | LOC10013481 FAM48A   | CDK6     |
| LOC652864 | LOC730427 | SFRS3     | IFNGR2    | LOC120376 FAM50A     | CDKAL1   |
| LOC653079 | LOC730525 | SFTPD     | IFP38     | LOC147727 FAM50B     | CDKL3    |
| LOC653188 | LOC730995 | SGCA      | IFT172    | LOC148430 FAM53C     | CDO1     |
| LOC653197 | LOC731444 | SGPL1     | IGF2BP1   | LOC148915 FAM63B     | CDR2L    |
| LOC653242 | LOC731486 | SH3BGRL2  | IGHMBP2   | LOC149501 FAM65A     | CDS1     |
| LOC653269 | LOC731999 | SH3BP5L   | IGSF8     | LOC151162 FAM65C     | CDX2     |
| LOC653316 | LOC732316 | SHC3      | IKZF2     | LOC200030 FAM78A     | CDX4     |
| LOC653423 | LOC791120 | SHE       | IKZF5     | LOC253039 FAM80B     | CEACAM1  |
| LOC653471 | LOC92017  | SHRM      | IL10      | LOC255275 FAM83D     | CEBPA    |
| LOC653596 | LONP1     | SIAH2     | IL15RA    | LOC283267 FAM90A3    | CEBPB    |
| LOC653857 | LPCAT1    | SIX2      | IL17RA    | LOC283755 FANCB      | CEBPD    |
| LOC654069 | LPXN      | SKIV2L    | IL18      | LOC284023 FANCE      | CEBPZ    |
| LOC654085 | LRMP      | SLA       | IL1RAPL1  | LOC284293 FAR1       | CECR2    |
| LOC654128 | LRP11     | SLAIN1    | IL1RL1    | LOC284821 FASTKD1    | CEL      |
| LOC654189 | LRRC19    | SLBP      | IL1RL2    | LOC285550 FAT1       | CELP     |
| LOC727762 | LRRC28    | SLC16A3   | IL23A     | LOC339970 FBLIM1     | CENPB    |
| LOC727882 | LRRC29    | SLC22A23  | IL6ST     | LOC341965 FBXL14     | CENPH    |
| LOC727901 | LRRC42    | SLC25A17  | IMMT      | LOC344328 FBXL20     | CENPK    |
| LOC728060 | LRRN3     | SLC25A4   | IMPACT    | LOC344405 FBXO3      | CENPQ    |
| LOC728178 | LST1      | SLC2A12   | IMPDH1    | LOC347544 FBXO36     | CENPT    |
| LOC728263 | LY6G5C    | SLC36A1   | INCENP    | LOC388796 FBXO4      | CENTA1   |
| LOC728320 | LY6G6D    | SLC36A4   | INHBB     | LOC388814 FBXO45     | CEP68    |



|           |          |            |          |           |          |        |
|-----------|----------|------------|----------|-----------|----------|--------|
| LOC728408 | LY86     | SLC43A1    | INPP4A   | LOC388969 | FBXO8    | CEP78  |
| LOC728493 | LY9      | SLC9A1     | INPP5F   | LOC389386 | FBXW2    | CER1   |
| LOC728518 | LYL1     | SLC9A4     | INTS1    | LOC390183 | FBXW5    | CETN3  |
| LOC728653 | LYVE1    | SLIT3      | INTS12   | LOC390354 | FCER1G   | CFB    |
| LOC728924 | M160     | SLN        | INTS3    | LOC390940 | FCGR2A   | CFD    |
| LOC729051 | MAGEA12  | SMARCC2    | INTS9    | LOC391132 | FCGR3B   | CFLAR  |
| LOC729222 | MAGI1    | SMARCD2    | IPO11    | LOC391764 | FCHO1    | CGRRF1 |
| LOC729279 | MAP2K1   | SNAP25     | IPO9     | LOC399815 | FCN3     | CHAC1  |
| LOC729374 | MAP3K5   | SNAPC2     | IPPK     | LOC400750 | FCRLB    | CHAF1A |
| LOC729375 | MAP7     | SNAPC5     | IQCC     | LOC401098 | FER      | CHCHD2 |
| LOC729408 | MAP7D1   | SNORA64    | IRAK4    | LOC401720 | FERMT3   | CHCHD3 |
| LOC729466 | MARCH7   | SNORA70B   | IRS2     | LOC439949 | FES      | CHCHD4 |
| LOC729495 | MARCO    | SNORD10    | IRX5     | LOC440927 | FETUB    | CHCHD6 |
| LOC729513 | MARVELD1 | SNORD100   | ITGB3BP  | LOC441046 | FEZ2     | CHCHD9 |
| LOC729642 | MARVELD2 | SNORD12    | ITGB7    | LOC441066 | FGD1     | CHD4   |
| LOC729645 | MCCD1    | SNORD12C   | ITPKB    | LOC441087 | FGD6     | CHD5   |
| LOC729647 | MCF2L    | SNORD14B   | ITPR1    | LOC441481 | FGF11    | CHD9   |
| LOC729659 | MED24    | SNORD58B   | ITPRIP   | LOC441896 | FGFR1    | CHDH   |
| LOC729764 | MEF2C    | SNORD68    | JAGN1    | LOC442075 | FGL1     | CHEK1  |
| LOC729789 | MEG8     | SNORD83B   | JAK1     | LOC442727 | FGL2     | CHEK2  |
| LOC729798 | MEMO1    | SNRNP70    | JHDM1D   | LOC642197 | FGR      | CHGA   |
| LOC729843 | METTL2A  | SNX14      | JMJD2C   | LOC642502 | FH       | CHGB   |
| LOC730004 | MEX3C    | SNX29      | JMJD6    | LOC643033 | FHL3     | CHMP2A |
| LOC730036 | MFSD7    | SNX3       | JTB      | LOC643256 | FIG4     | CHMP4A |
| LOC730074 | MGC12760 | SNX7       | KBTBD6   | LOC643308 | FIS1     | CHMP5  |
| LOC730107 | MGC29506 | SPAG9      | KCND3    | LOC643779 | FIT1     | CHMP6  |
| LOC730130 | MGC3196  | SPG21      | KCNIP4   | LOC643863 | FKBP10   | CHN1   |
| LOC730134 | MIA2     | SPG7       | KCTD5    | LOC643911 | FKBP1A   | CHN2   |
| LOC730288 | MICAL2   | SPOP       | KCTD7    | LOC643997 | FLCN     | CHODL  |
| LOC730316 | MIDN     | SPOPL      | KGFLP1   | LOC644315 | FLJ10324 | CHP2   |
| LOC730323 | MIMT1    | SPSB4      | KIAA0196 | LOC644380 | FLJ10357 | CHPF2  |
| LOC730324 | MINPP1   | SPTAN1     | KIAA0406 | LOC644412 | FLJ10661 | CHPT1  |
| LOC730396 | MIR144   | SRFBP1     | KIAA0492 | LOC644422 | FLJ10781 | CHRD   |
| LOC730952 | MIR182   | SRGAP3     | KIAA0495 | LOC644517 | FLJ12355 | CHRNA3 |
| LOC731007 | MIR1976  | SSH1       | KIAA0738 | LOC644739 | FLJ12684 | CHRNA5 |
| LOC731985 | MIR300   | ST14       | KIAA1147 | LOC644877 | FLJ14166 | CHRNA9 |
| LOC732160 | MIR886   | ST6GALNAC4 | KIAA1160 | LOC644936 | FLJ22531 | CHST12 |
| LOC732432 | MMRN1    | ST8SIA4    | KIAA1211 | LOC645100 | FLJ25006 | CHST2  |
| LOC732450 | MNDA     | STAG1      | KIAA1285 | LOC645296 | FLJ35934 | CHST3  |
| LOC91661  | MOBK1A   | STAT5A     | KIAA1324 | LOC645387 | FLJ36131 | CHST4  |
| LOXL1     | MPO      | STK38      | KIAA1333 | LOC645508 | FLJ37786 | CHST6  |
| LPCAT2    | MPP3     | STMN2      | KIAA1524 | LOC645659 | FLJ39660 | CHST7  |
| LRP1B     | MPP5     | STOX1      | KIAA1618 | LOC645737 | FLJ40113 | CHST8  |
| LRP2      | MPV17L2  | STRC       | KIAA1671 | LOC645822 | FLJ44342 | CIB1   |
| LRR67     | MRPL42P5 | STYX       | KIAA1958 | LOC646038 | FLJ46906 | CIB2   |
| LRRFIP1   | MRPL46   | SUMO1      | KIAA2026 | LOC646123 | FLJ90036 | CIC    |
| LRRN4     | MRPS24   | SUSD1      | KIF11    | LOC646531 | FLJ90086 | CIDEB  |
| LSM10     | MS4A3    | SYT14      | KIF14    | LOC646785 | FLNA     | CIP29  |
| LSM11     | MS4A4A   | SYT9       | KIF18A   | LOC646909 | FLVCR2   | CIR1   |
| LSM6      | MS4A7    | TACC2      | KIF1C    | LOC647030 | FLYWCH2  | CIRH1A |

|           |            |          |             |           |         |         |
|-----------|------------|----------|-------------|-----------|---------|---------|
| LY6G6C    | MSLN       | TACO1    | KIF20B      | LOC647037 | FMNL2   | CITED2  |
| LYG1      | MSN        | TACSTD2  | KIF22       | LOC647691 | FMO3    | CITED4  |
| LYN       | MSR1       | TAF15    | KIF24       | LOC647886 | FMO5    | CKAP2L  |
| LYPD3     | MT1B       | TAF9     | KIF4A       | LOC647954 | FNDC1   | CKAP5   |
| LYPD5     | MTHFD2L    | TAP1     | KILLIN      | LOC648000 | FOLH1B  | CKB     |
| LYPLA2P1  | MUC12      | TAS2R10  | KLHDC3      | LOC648638 | FOXD4L1 | CKMT1A  |
| LZTR1     | MX2        | TBC1D1   | KLHDC8A     | LOC648822 | FOXM1   | CKMT1B  |
| MAB21L2   | MXI1       | TBC1D10B | KLHL15      | LOC648931 | FOXN2   | CKS1B   |
| MAEA      | MYCBPAP    | TBC1D24  | KLHL2       | LOC649169 | FRAP1   | CLASP1  |
| MAGT1     | MYH3       | TBL1X    | KLHL35      | LOC649209 | FRAT1   | CLASP2  |
| MAML1     | MYO16      | TBRG4    | KPNA7       | LOC649270 | FRG1    | CLCNKA  |
| MAML3     | MYO1F      | TBX2     | KRT6B       | LOC649330 | FRK     | CLCNKB  |
| MAN1B1    | MYO1G      | TCEB1    | KTI12       | LOC649604 | FRMD4A  | CLDN1   |
| MAP1A     | NACAP1     | TCEB3CL  | L3MBTL3     | LOC649639 | FRMD5   | CLDN10  |
| MAP2      | NAPSA      | TCF21    | LAD1        | LOC649917 | FRS3    | CLDN11  |
| MAP2K1IP1 | NAPSB      | TCTEX1D1 | LAIR1       | LOC650826 | FTHL11  | CLDN14  |
| MAPK4     | NCF1C      | TEAD3    | LAMP1       | LOC651202 | FTHL16  | CLDN15  |
| MAPKBP1   | NCF2       | TERF2    | LANCL2      | LOC651436 | FTHL2   | CLDN18  |
| MARK2     | NCF4       | TES      | LASS5       | LOC652094 | FTL     | CLDN6   |
| MATN1     | NCKAP1L    | TEX14    | LAT1-3TM    | LOC652624 | FUBP1   | CLEC16A |
| MATN2     | NCRNA00081 | TFRC     | LCLAT1      | LOC652741 | FUCA1   | CLEC2D  |
| MBD3L2    | NDUFA8     | TGFA     | LDHA        | LOC652773 | FUT10   | CLGN    |
| MBTPS1    | NFKBIL1    | THAP8    | LDLRAD3     | LOC652837 | FUT9    | CLIC1   |
| MCHR2     | NHLRC4     | THUMPD1  | LDOC1L      | LOC653066 | FVT1    | CLIC4   |
| MDH2      | NID1       | TIE1     | LEP         | LOC653080 | FXD2    | CLIC6   |
| MED12L    | NKAP       | TIMM23B  | LETM1       | LOC653110 | G6PC    | CLIP3   |
| MED15     | NKD2       | TIPRL    | LFNG        | LOC653210 | G6PC3   | CLK1    |
| MED16     | NKG7       | TJP2     | LGALS4      | LOC653333 | GABARAP | CLK2    |
| MED18     | NLRP3      | TMEM14B  | LGALS9B     | LOC653383 | GABBR1  | CLK3    |
| MED7      | NLRP4      | TMEM170A | LGI1        | LOC653505 | GABBR2  | CLN3    |
| MEI1      | NME4       | TMEM173  | LGTN        | LOC653566 | GABRG2  | CLNS1A  |
| MFN2      | NOL10      | TMEM194B | LILRB1      | LOC653583 | GADD45B | CLPTM1  |
| MFSD3     | NOL12      | TMEM47   | LIN7A       | LOC653604 | GAL3ST1 | CLSTN1  |
| MFSD8     | NOTCH4     | TMEM54   | LIN9        | LOC653631 | GALE    | CLTA    |
| MGC21881  | NPAS3      | TMEM63A  | LINS1       | LOC653702 | GALK1   | CLYBL   |
| MGC23270  | NPC1       | TMEM80   | LMBR1       | LOC654002 | GALNT7  | CMPK1   |
| MGC23284  | NPHP1      | TMEM97   | LMNB2       | LOC654121 | GAPDH   | CMTM3   |
| MGC26718  | NPTN       | TMLHE    | LMO7        | LOC654191 | GAS2    | CMTM4   |
| MGC26733  | NR2F1      | TMTC2    | LMTK2       | LOC723972 | GAS7    | CNBP    |
| MGC45800  | NRF1       | TNFAIP6  | LOC10000967 | LOC727761 | GAS8    | CNDP2   |
| MICA      | NRG3       | TNFRSF19 | LOC10012791 | LOC727826 | GATAD1  | CNFN    |
| MID1IP1   | NSMCE2     | TNFRSF1A | LOC10012797 | LOC727950 | GATAD2A | CNGA1   |
| MIER1     | NSUN2      | TNFSF4   | LOC10012798 | LOC727970 | GATM    | CNIH4   |
| MINK1     | NSUN3      | TNNT2    | LOC10012799 | LOC728411 | GBA3    | CNKSR3  |
| MIP       | NTSR1      | TNRC15   | LOC10012800 | LOC728452 | GBAS    | CNN1    |
| MIR1228   | NXF3       | TNS3     | LOC10012806 | LOC728499 | GBP1    | CNN2    |
| MIR1247   | OBFC2B     | TOM1L1   | LOC10012808 | LOC728532 | GCA     | CNNM3   |
| MIR128-2  | OGN        | TOX3     | LOC10012819 | LOC728734 | GCAT    | CNOT4   |
| MIR30C2   | OIT3       | TP53     | LOC10012822 | LOC728843 | GCK     | CNOT6L  |
| MIR507    | OLFM2      | TP53I3   | LOC10012826 | LOC728877 | GCKR    | CNOT7   |

|          |          |          |             |           |         |          |
|----------|----------|----------|-------------|-----------|---------|----------|
| MIR586   | OLFM4    | TPM3     | LOC10012829 | LOC729217 | GCLC    | CNRIP1   |
| MIR720   | OPRK1    | TPP2     | LOC10012834 | LOC729259 | GDF11   | CNTN1    |
| MKKS     | OR1J1    | TPST2    | LOC10012839 | LOC729505 | GEN1    | CNTNAP1  |
| MKL1     | OR5K4    | TREML2   | LOC10012839 | LOC729535 | GFOD1   | CNTNAP2  |
| MKRN2    | ORAOV1   | TRIM22   | LOC10012846 | LOC729687 | GFOD2   | CNTNAP3  |
| MLEC     | OTUD5    | TRIM36   | LOC10012850 | LOC729708 | GGCX    | CNTNAP3B |
| MLL      | P2RX1    | TRIM44   | LOC10012851 | LOC729732 | GGH     | COASY    |
| MLLT1    | P2RY13   | TRIM52   | LOC10012852 | LOC729774 | GGT1    | COBLL1   |
| MLLT6    | P2RY8    | TRIM61   | LOC10012867 | LOC729852 | GGT2    | COCH     |
| MMP1     | P4HTM    | TRIM68   | LOC10012873 | LOC729905 | GGT3P   | COG5     |
| MMP15    | PACAP    | TRIP6    | LOC10012877 | LOC729926 | GGTLC2  | COL12A1  |
| MMP28    | PACSIN3  | TRPV1    | LOC10012893 | LOC730041 | GHRLOS  | COL1A1   |
| MOBKL2A  | PADI4    | TRPV2    | LOC10012902 | LOC730060 | GIMAP2  | COL1A2   |
| MON2     | PAFAH1B1 | TSPAN12  | LOC10012902 | LOC730167 | GLIPR1  | COL22A1  |
| MORG1    | PARVB    | TSPAN14  | LOC10012905 | LOC730202 | GLMN    | COL23A1  |
| MORN3    | PARVG    | TSPAN17  | LOC10012914 | LOC730313 | GLRX2   | COL3A1   |
| MPHOSPH8 | PCDH12   | TSR1     | LOC10012930 | LOC730993 | GLTP    | COL4A2   |
| MRFAP1L1 | PCDH9    | TTC18    | LOC10012934 | LOC730996 | GLTPD2  | COL4A3BP |
| MRGPRX1  | PCSK4    | TTC3     | LOC10012936 | LOC731049 | GLUD1   | COL4A5   |
| MRGPRX3  | PCYT1B   | TTL      | LOC10012938 | LOC732075 | GLYAT   | COL4A6   |
| MRGPRX4  | PDE1A    | TTLL12   | LOC10012942 | LOC90586  | GMFB    | COL5A1   |
| MRPL13   | PDE2A    | TTY14    | LOC10012942 | LOC92755  | GMFG    | COL5A2   |
| MRPL16   | PECAM1   | TUFT1    | LOC10012944 | LPAR1     | GMPPA   | COL6A3   |
| MRPL20   | PET112L  | TWIST2   | LOC10012944 | LPIN1     | GMPPB   | COL8A1   |
| MRPL30   | PEX19    | TXNDC5   | LOC10012952 | LPL       | GMPR2   | COMMMD10 |
| MRPL32   | PEX5L    | TXNDC9   | LOC10012954 | LPP       | GNA13   | COMMMD3  |
| MRPL4    | PF4V1    | UBE1DC1  | LOC10012960 | LRBA      | GNAT1   | COMMMD7  |
| MRPL48   | PGA3     | UBE2D2   | LOC10012963 | LRP1      | GNB3    | COMMMD9  |
| MRPS10   | PGA5     | UBE2D3   | LOC10012970 | LRRIC1    | GNGT1   | COPE     |
| MRPS11   | PGLYRP1  | UBE2E1   | LOC10012974 | LRRIC3    | GNL2    | COPS7A   |
| MRPS17   | PHC3     | UBE3B    | LOC10012978 | LRRIC45   | GNMT    | COQ10A   |
| MRPS18B  | PHF12    | UBTD1    | LOC10012993 | LRRIC61   | GNPDA1  | COQ3     |
| MRPS2    | PHOSPHO1 | UEVLD    | LOC10012995 | LSR       | GOLGA4  | COQ5     |
| MSL1     | PI4K2A   | UHMK1    | LOC10012996 | LTBP4     | GOLGA6B | COTL1    |
| MTP18    | PI4KA    | ULK4     | LOC10012997 | LUM       | GOLM1   | COX11    |
| MTRR     | PIN4     | UMPS     | LOC10013005 | LYSMD1    | GOLT1B  | COX6B1   |
| MTUS2    | PIP4K2C  | UNC45A   | LOC10013007 | LZTS2     | GPAA1   | CPEB1    |
| MTX1     | PIP5K1B  | UPF1     | LOC10013016 | MAD2L1BP  | GPATCH2 | CPM      |
| MUC15    | PIP5KL1  | URB2     | LOC10013017 | MAGED2    | GPC6    | CPN1     |
| MUM1L1   | PKD2L1   | USMG5    | LOC10013035 | MAGOH     | GPIHBP1 | CPN2     |
| MUS81    | PLEKHA3  | UTP11L   | LOC10013038 | MALL      | GPKOW   | CPNE4    |
| MUTED    | PLGLA    | VCAM1    | LOC10013038 | MAN1C1    | GPN1    | CPO      |
| MXRA8    | PLIN     | VEZT     | LOC10013042 | MAN2B1    | GPR116  | CPS1     |
| MYBBP1A  | PLVAP    | VISA     | LOC10013042 | MANEAL    | GPR128  | CPSF2    |
| MYBPHL   | PMF1     | VKORC1L1 | LOC10013044 | MAP3K1    | GPR146  | CPSF6    |
| MYCBP2   | PMS2L3   | VSIG2    | LOC10013046 | MAP3K2    | GPR175  | CPT1A    |
| MYL3     | PNMT     | VSTM2B   | LOC10013051 | MAP3K6    | GPR27   | CPT1B    |
| MYNN     | PODN     | VWF      | LOC10013052 | MAP3K7IP1 | GPS2    | CPT1C    |
| MYO3A    | POGK     | WDR20    | LOC10013054 | MAP3K8    | GPSM1   | CPXM1    |
| NACAD    | POLR2C   | WDR21A   | LOC10013055 | MAP4K4    | GPT     | CPXM2    |

|            |          |         |                      |          |          |
|------------|----------|---------|----------------------|----------|----------|
| NANS       | POLRMT   | WDR26   | LOC10013055 MAP7D2   | GPX3     | CPZ      |
| NARFL      | POP7     | WDR40A  | LOC10013057 MAPK10   | GRAP     | CR2      |
| NAT1       | POU2AF1  | WDR59   | LOC10013059 MAPK3    | GRB7     | CRABP1   |
| NAT14      | PPAPDC1B | WDR60   | LOC10013063 MAPK8IP3 | GRHL3    | CRABP2   |
| NCOA3      | PPDPF    | WDR82   | LOC10013080 MAPKAPK3 | GRHPR    | CRADD    |
| NCOR1      | PPFIA3   | WDR91   | LOC10013093 MAT2A    | GRIN3B   | CRAT     |
| NCRNA00095 | PPIL2    | WFIKKN1 | LOC10013093 MATK     | GRIP2    | CREB3L3  |
| NDUFA10    | PPM1F    | WHSC1   | LOC10013107 MBD4     | GSS      | CREB3L4  |
| NDUFA13    | PPM1J    | WNT5A   | LOC10013109 MBTD1    | GSTM1    | CREB5    |
| NDUFA6     | PPP1R14D | WRNIP1  | LOC10013109 MCFD2    | GSTM4    | CREG1    |
| NDUFAB1    | PPTC7    | WWP2    | LOC10013122 MCM10    | GSTO1    | CRIP1    |
| NDUFAB2    | PQLC3    | YPEL3   | LOC10013126 MCM3AP   | GSTP1    | CRISPLD2 |
| NDUFB4     | PRAM1    | YTHDF2  | LOC10013127 MCM4     | GTF2E1   | CRK      |
| NDUFB9     | PRB3     | YWHAE   | LOC10013134 MCM5     | GTF2H4   | CRLF1    |
| NEDD4L     | PRKAA2   | YWHAG   | LOC10013136 MCM6     | GTF2IRD1 | CRMP1    |
| NEU1       | PRKG2    | ZBTB40  | LOC10013145 MCM7     | GTF3C2   | CROP     |
| NF1        | PRMT8    | ZBTB80S | LOC10013146 MCMDC1   | GTF3C3   | CROT     |
| NFAT5      | PRND     | ZC3H15  | LOC10013151 MDP1     | GTPBP2   | CRSP2    |
| NGLY1      | PRO0132  | ZC3H4   | LOC10013169 MED28    | GUCA1A   | CRTAP    |
| NHLRC3     | PRPF3    | ZCCHC14 | LOC10013170 METTL13  | GUCA2A   | CRTC2    |
| NIPAL4     | PRR15L   | ZDHHC4  | LOC10013177 MEX3D    | GUCY2C   | CRTC3    |
| NIPSNAP1   | PRSS21   | ZER1    | LOC10013178 MFSD11   | GUK1     | CRY1     |
| NKX2-3     | PRSS8    | ZFAND6  | LOC10013189 MGA      | GUSB     | CRY2     |
| NOG        | PRSSL1   | ZFP30   | LOC10013197 MGAT4A   | GYS2     | CRYGD    |
| NOL4       | PRTN3    | ZMYND19 | LOC10013198 MGAT4B   | H2AFJ    | CRYL1    |
| NOLA1      | PSCD4    | ZNF137  | LOC10013201 MGC10997 | H2AFX    | CRYZ     |
| NOLC1      | PSCDBP   | ZNF148  | LOC10013202 MGC27345 | H2AFY2   | CRYZL1   |
| NPHP3      | PSD      | ZNF16   | LOC10013223 MGC3020  | HAAO     | CSAD     |
| NPNT       | PSMA3    | ZNF259  | LOC10013228 MGC5139  | HADH2    | CSDA     |
| NRXN3      | PSMB2    | ZNF264  | LOC10013229 MGC72080 | HADHA    | CSDE1    |
| NSMCE1     | PSMB7    | ZNF3    | LOC10013234 MGST1    | HADHB    | CSE1L    |
| NTF4       | PSMD1    | ZNF318  | LOC10013243 MINA     | HAGH     | CSF1R    |
| NTF5       | PTCRA    | ZNF346  | LOC10013252 MIR1974  | HAL      | CSF2RA   |
| NTRK2      | PTPN1    | ZNF407  | LOC10013255 MIR503   | HAMP     | CSK      |
| NUMB       | PTPN11   | ZNF436  | LOC10013255 MKL2     | HAO1     | CSNK1A1  |
| NUP214     | PTPRB    | ZNF470  | LOC10013258 MLF1IP   | HAO2     | CSNK1D   |
| NXPH2      | PTPRC    | ZNF488  | LOC10013265 MLH1     | HAS1     | CSNK1E   |
| OBSCN      | PTPRCAP  | ZNF491  | LOC10013272 MLST8    | HAUS4    | CSNK2A1  |
| OCLN       | PTPRN2   | ZNF500  | LOC10013277 MNT      | HAUS8    | CSNK2A1P |
| ODAM       | PTPRO    | ZNF526  | LOC10013286 MOCS1    | HBG2     | CSRP2    |
| OFD1       | PTPRU    | ZNF670  | LOC10013286 MOCS2    | HCCA2    | CST1     |
| OLR1       | PUSL1    | ZNF791  | LOC10013296 MOGS     | HCFC1R1  | CST3     |
| OPHN1      | PVALB    | ZNF92   | LOC10013304 MPHOSPH9 | HCG2P7   | CST6     |
| OR10AG1    | R3HDM2   | ZYG11B  | LOC10013305 MRPL1    | HCN4     | CSTF1    |
| OR7E91P    | RAB33B   | ZYX     | LOC10013305 MRPL36   | HCST     | CSTF3    |
| OSAP       | RAB6A    |         | LOC10013307 MRPL37   | HDDC2    | CTAGE6   |
| OSBPL11    | RAB6B    |         | LOC10013312 MRPL43   | HDGF2    | CTBP2    |
| OSGEP      | RAD23A   |         | LOC10013314 MRPL50   | HDHD1A   | CTCF     |
| OSTF1      | RAD23B   |         | LOC10013317 MRPS12   | HERC4    | CTDSP1   |
| OTUD4      | RAG1AP1  |         | LOC10013318 MRPS25   | HES1     | CTGF     |

|          |          |                        |           |          |
|----------|----------|------------------------|-----------|----------|
| OVCA2    | RAMP3    | LOC10013323 MRPS6      | HEXDC     | CTGLF7   |
| OVOL1    | RAP2A    | LOC10013326 MRPS9      | HFM1      | CTH      |
| OXGR1    | RAPGEF2  | LOC10013331 MSRB3      | HGD       | CTHRC1   |
| OXTR     | RARS     | LOC10013346 MTERFD1    | HGFAC     | CTNNA1   |
| P2RX6    | RASSF10  | LOC10013346 MTHFSD     | HHEX      | CTPS2    |
| P2RY6    | RB1CC1   | LOC10013347 MXRA5      | HINT1     | CTSA     |
| PABPC4   | RBM16    | LOC10013348 MXRA7      | HINT2     | CTSB     |
| PACS1    | RBM28    | LOC10013356 MYH10      | HIPK2     | CTSC     |
| PAK4     | RBM38    | LOC10013359 MYLIP      | HIST1H2AC | CTSH     |
| PAQR6    | RBM43    | LOC10013360 MYO5B      | HIST1H2AE | CTSL1    |
| PCCB     | RBP2     | LOC10013372 MYO9A      | HIST1H4C  | CTSL2    |
| PCDHB10  | RCE1     | LOC10013374 MYOM2      | HIST2H2AB | CTSO     |
| PCDHB16  | RDH14    | LOC10013377 MYPOP      | HIVEP1    | CTSZ     |
| PCDHB4   | REEP5    | LOC10013377 N4BP2      | HLA-DPA1  | CTXN1    |
| PCDHGA12 | REPS1    | LOC10013393 NAALAD2    | HLA-DRB4  | CUL4B    |
| PCIF1    | REST     | LOC10013405 NADSYN1    | HLF       | CUX2     |
| PCP4     | RETN     | LOC10013408 NASP       | HLX       | CUZD1    |
| PCSK7    | RFX2     | LOC10013408 NAT10      | HMBOX1    | CXCL1    |
| PDCD6IP  | RFXDC2   | LOC10013409 NAT12      | HMGA2     | CXCL12   |
| PDGFB    | RGS18    | LOC10013415 NAT5       | HMGCL     | CXCL5    |
| PDRG1    | RGS6     | LOC10013418 NAV3       | HMGCLL1   | CXCL6    |
| PDXDC2   | RHAG     | LOC10013421 NBEAL2     | HMOX1     | CXorf15  |
| PDZD3    | RHBDD3   | LOC10013422 NBPF11     | HMX2      | CXorf38  |
| PDZRN3   | RHBG     | LOC10013425 NBPF14     | HNF1A     | CXorf57  |
| PELI3    | RHCE     | LOC10013426 NBPF3      | HNF4G     | CXorf64  |
| PER3     | RHOH     | LOC10013436 NCAPD2     | HNRNPA0   | CXXC1    |
| PES1     | RHOJ     | LOC10013458 NCAPG2     | HNRNPH3   | CXXC6    |
| PFTK1    | RHOT2    | LOC10013466 NCL        | HNRNPL    | CYB561   |
| PGBD5    | RHPN1    | LOC10013470 NCRNA00085 | HNRNPUL2  | CYB561D1 |
| PGM1     | RIOK2    | LOC10013473 NCRNA00092 | HNRPA1L-2 | CYB5D2   |
| PHCA     | RIPK3    | LOC10013486 NDUFS2     | HNRPA1P4  | CYB5R1   |
| PHF10    | RNASE2   | LOC10019093 NEFH       | HNRPC     | CYB5R2   |
| PHF20L1  | RNASE3   | LOC113230 NEIL3        | HNRPH3    | CYB5R3   |
| PHF3     | RNF14    | LOC121792 NET1         | HOMER1    | CYBRD1   |
| PHLPP1   | RNF212   | LOC123876 NEURL4       | HOMER3    | CYCS     |
| PHPT1    | RNU4ATAC | LOC130773 NFKBIA       | HOXB1     | CYCSL1   |
| PIBF1    | ROBO4    | LOC131691 NGFR         | HP        | CYCSP52  |
| PIGC     | ROGDI    | LOC136143 NIP7         | HPCAL1    | CYFIP1   |
| PIGG     | ROPN1B   | LOC139735 NIPBL        | HPD       | CYFIP2   |
| PIH1D1   | RP9      | LOC143941 NISCH        | HPR       | CYorf15A |
| PILRB    | RPRC1    | LOC145783 NKAIN1       | HRC       | CYorf15B |
| PIP5K1C  | RPS29    | LOC145837 NKTR         | HRG       | CYP1A1   |
| PIPSL    | RPS6KA1  | LOC146053 NKX3-1       | HSD3B7    | CYP20A1  |
| PIWIL4   | RRP1     | LOC149224 NLF2         | HSDL1     | CYP26A1  |
| PKN2     | RRP1B    | LOC149351 NMRAL1       | HSF1      | CYP27A1  |
| PLAA     | RSAD2    | LOC151579 NNMT         | HSFX1     | CYP27B1  |
| PLAC2    | RUNDC3A  | LOC152217 NODAL        | HSP90AB1  | CYP2C8   |
| PLCD1    | S100A12  | LOC152586 NOP16        | HSPC268   | CYP2F1   |
| PLCXD3   | S100A8   | LOC197350 NOXA1        | HULC      | CYP2J2   |
| PLD5     | S100A9   | LOC201175 NPEPPS       | HYAL1     | CYP2S1   |

|             |           |           |         |         |         |
|-------------|-----------|-----------|---------|---------|---------|
| PLEKHG4B    | SAMD1     | LOC203547 | NPLOC4  | IAH1    | CYP3A7  |
| PLEKHJ1     | SAMD8     | LOC220433 | NPY     | ICA1L   | CYP51A1 |
| PMFBP1      | SAMD9L    | LOC255167 | NR1D2   | ICAM2   | CYTH1   |
| PMS2        | SAMSN1    | LOC283481 | NR2F6   | ICAM3   | CYTL1   |
| PNRC2       | SASH3     | LOC283711 | NRBP1   | ID1     | CYTSB   |
| POLH        | SATB2     | LOC285095 | NRBP2   | ID4     | D2HGDH  |
| POLR2J2     | SCARNA13  | LOC285176 | NRCAM   | IFI27L1 | DAB2    |
| POLR2J3     | SCFD2     | LOC285908 | NRD1    | IFI44   | DALRD3  |
| POLR3E      | SCGB3A1   | LOC286002 | NRIP1   | IFITM4P | DAP     |
| POM121C     | SCN7A     | LOC286367 | NSBP1   | IGBP1   | DAZ4    |
| POMT2       | SCRIB     | LOC286512 | NSL1    | IGF1R   | DAZAP1  |
| POPDC2      | SCRN3     | LOC338756 | NT5DC2  | IGF2BP2 | DAZAP2  |
| POTEE       | SDPR      | LOC338870 | NTAN1   | IGFALS  | DBC1    |
| PPAN-P2RY11 | SEC24A    | LOC339804 | NTF3    | IGFBP1  | DBI     |
| PPEF1       | SEC24B    | LOC339843 | NTHL1   | IHPK3   | DBNDD1  |
| PPIE        | SELL      | LOC342979 | NTN4    | IKBKAP  | DBNDD2  |
| PPIL6       | SELP      | LOC342994 | NUDC    | IKBKE   | DBNL    |
| PPP1R3D     | SERAC1    | LOC347487 | NUDT18  | IKBKG   | DCAF6   |
| PPP2R3A     | SERPINA13 | LOC388076 | NUDT7   | IL17RB  | DCK     |
| PPP3R1      | SETD8     | LOC388237 | NUF2    | IL18BP  | DCLK1   |
| PRAMEF13    | SFI1      | LOC388327 | NUP62CL | IL1B    | DCLRE1C |
| PRDM7       | SFRS2B    | LOC388339 | NUP88   | IL1RAP  | DCN     |
| PRDX3       | SFRS8     | LOC388503 | NUPL2   | IL1RN   | DCTN3   |
| PRINS       | SGIP1     | LOC388514 | NVL     | IL22RA1 | DCUN1D5 |
| PRKAR2A     | SHROOM3   | LOC388564 | OGG1    | IL6     | DDB1    |
| PRKCE       | SIGLEC10  | LOC388681 | OGT     | IL6R    | DDB2    |
| PRKRIP1     | SIGLEC11  | LOC388955 | OLFML2A | ILD1R1  | DDC     |
| PRPF18      | SIGLEC14  | LOC389053 | OPLAH   | ILKAP   | DDIT3   |
| PRPF40A     | SIGLEC16  | LOC389072 | OPRL1   | IMP3    | DDIT4   |
| PRPSAP1     | SIGLEC7   | LOC389156 | ORC1L   | IMPA2   | DDIT4L  |
| PRR15       | SLC11A1   | LOC389465 | OSBP    | IMPDH2  | DDOST   |
| PRRT1       | SLC12A4   | LOC389523 | OSBPL5  | INA     | DDR1    |
| PRSS22      | SLC12A8   | LOC389634 | OSBPL7  | INO80D  | DDR2    |
| PRTG        | SLC13A3   | LOC389791 | OSCAR   | INPP1   | DDX10   |
| PSKH1       | SLC17A8   | LOC390298 | OSTC    | INPP5B  | DDX11   |
| PSMA5       | SLC1A4    | LOC390671 | OTUD1   | INTS2   | DDX19B  |
| PSMB3       | SLC22A16  | LOC390956 | P2RY2   | INTS8   | DDX21   |
| PSMC4       | SLC22A4   | LOC391126 | P2RY5   | INTU    | DDX25   |
| PSMD3       | SLC25A38  | LOC391359 | P4HB    | IPO8    | DDX28   |
| PSMD8       | SLC26A1   | LOC391370 | PAF1    | IPW     | DDX31   |
| PSME3       | SLC26A10  | LOC391656 | PAFAH2  | IRAK2   | DDX47   |
| PSMG1       | SLC26A3   | LOC391817 | PALM    | IREB2   | DEAF1   |
| PSMG3       | SLC30A2   | LOC392145 | PAM     | IRF5    | DECR1   |
| PTAFR       | SLC35E4   | LOC392197 | PAMR1   | IRF7    | DEFB130 |
| PTOV1       | SLC38A5   | LOC399900 | PANK2   | IRX1    | DEGS1   |
| PUF60       | SLC38A6   | LOC400027 | PAPOLA  | ISCU    | DEM1    |
| PUM2        | SLC4A1    | LOC400174 | PAPPA   | ISG20   | DENND1A |
| PURB        | SLC4A3    | LOC400446 | PAQR8   | ISG20L2 | DENND2A |
| PVRL3       | SLC5A11   | LOC400578 | PARP16  | ISOC1   | DENND4C |
| PVRL4       | SLC9A7    | LOC400657 | PARP3   | ITFG3   | DENR    |

|          |            |           |         |          |              |
|----------|------------|-----------|---------|----------|--------------|
| PYGO2    | SLC9A9     | LOC400721 | PBX2    | ITGA3    | DEPDC6       |
| QSOX2    | SLCO5A1    | LOC400759 | PCBD2   | ITGA5    | DFFA         |
| RAB11A   | SMPD2      | LOC401007 | PCDH20  | ITGAL    | DFNB59       |
| RAB13    | SMPD4      | LOC401218 | PCDH7   | ITGAM    | DGAT1        |
| RAB8B    | SNAP47     | LOC401398 | PCDHB9  | ITGB2    | DGCR2        |
| RABGAP1L | SNF8       | LOC401588 | PCTK3   | ITGB5    | DGCR5        |
| RABL2B   | SNHG3-RCC1 | LOC401640 | PCYOX1  | ITIH2    | DHCR24       |
| RALGPS2  | SNHG9      | LOC401676 | PDCD4   | ITIH3    | DHCR7        |
| RANGRF   | SNN        | LOC401847 | PDE4D   | ITIH4    | DHRS2        |
| RAP1BL   | SNORA13    | LOC402342 | PDE4DIP | ITSN1    | DHRS3        |
| RAPGEF1  | SNORA70    | LOC402571 | PDE6G   | IWS1     | DHRS4        |
| RAPGEFL1 | SNORA78    | LOC402677 | PDE8A   | IYD      | DHRS4L2      |
| RASA2    | SNORD114-1 | LOC407835 | PDF     | JAG1     | DHX15        |
| RBM15B   | SNORD114-3 | LOC440055 | PDGFC   | JAM3     | DHX38        |
| RBM42    | SNORD15B   | LOC440280 | PDGFRB  | JDP2     | DHX9         |
| RBM4B    | SNORD1A    | LOC440503 | PDHB    | JMJD4    | DIABLO       |
| RELT     | SNORD33    | LOC440551 | PDLIM7  | JMY      | DIAPH1       |
| REPIN1   | SNORD35A   | LOC440589 | PDP2    | JUNB     | DIAPH2       |
| RETNLB   | SNORD42B   | LOC440776 | PDXDC1  | KANK2    | DIAPH3       |
| RFP      | SNORD4A    | LOC440925 | PEF1    | KARS     | DIDO1        |
| RFPL3S   | SNORD69    | LOC440926 | PEPD    | KAT2A    | DIMT1L       |
| RFX6     | SNRNP25    | LOC440991 | PEX11G  | KAT5     | DIO1         |
| RG9MTD1  | SNRPB2     | LOC441114 | PEX6    | KCNA6    | DIO2         |
| RGAG1    | SNRPG      | LOC441150 | PFAS    | KCNF1    | DKC1         |
| RGAG4    | SNX12      | LOC441208 | PGAM2   | KCNH2    | DKFZP564J102 |
| RGL2     | SNX21      | LOC441282 | PGBD1   | KCNH6    | DKFZp761P04  |
| RGP1     | SNX31      | LOC441461 | PGBD3   | KCNJ10   | DKK3         |
| RGS19    | SOBP       | LOC441488 | PGM2    | KCNMB2   | DLG2         |
| RHOBTB1  | SOX6       | LOC441511 | PGM3    | KCNS1    | DLG3         |
| RHOBTB2  | SP2        | LOC441550 | PGP     | KCTD11   | DLG5         |
| RIC8A    | SPESP1     | LOC441775 | PHF1    | KDM4D    | DLGAP5       |
| RICS     | SPI1       | LOC442421 | PHF13   | KEAP1    | DLK1         |
| RICTOR   | SPIB       | LOC442519 | PHF19   | KENAE    | DLL3         |
| RIN3     | SPO11      | LOC554223 | PHIP    | KHDC1    | DLX3         |
| RIOK1    | SPTA1      | LOC641710 | PHKG2   | KHDRBS1  | DLX5         |
| RLN1     | SPTB       | LOC641741 | PHLDB3  | KHDRBS2  | DMC1         |
| RMND5B   | SPTBN4     | LOC641772 | PI4KAP2 | KHK      | DMKN         |
| RN7SK    | SRCRB4D    | LOC641798 | PIAS1   | KIAA0101 | DMRTA1       |
| RNASET2  | SRL        | LOC641819 | PIGA    | KIAA0146 | DMWD         |
| RNF112   | SSH3       | LOC641848 | PIGN    | KIAA0174 | DNAH1        |
| RNF24    | STAB1      | LOC641941 | PIGS    | KIAA0363 | DNAH14       |
| RNF31    | STAB2      | LOC641972 | PIGW    | KIAA0427 | DNAJA1       |
| RNF43    | STAG3      | LOC641983 | PIM3    | KIAA0586 | DNAJA4       |
| RNMTL1   | STAG3L2    | LOC641989 | PIN1    | KIAA0907 | DNAJB12      |
| RNU1-5   | STAG3L3    | LOC642109 | PIPOX   | KIAA0947 | DNAJB2       |
| RNU1F1   | STAT5B     | LOC642373 | PITPNM1 | KIAA1012 | DNAJB6       |
| RNY3     | STX8       | LOC642441 | PITRM1  | KIAA1026 | DNAJB9       |
| RPA4     | SUCNR1     | LOC642458 | PJCG6   | KIAA1279 | DNAJC12      |
| RPL23    | SULT1C2    | LOC642628 | PKD1    | KIAA1688 | DNAJC15      |
| RPL26L1  | SUMF2      | LOC642656 | PKMYT1  | KIAA1797 | DNAJC18      |

|          |           |           |           |           |         |
|----------|-----------|-----------|-----------|-----------|---------|
| RPL29    | SYNC1     | LOC642749 | PKNOX1    | KIAA1826  | DNAJC2  |
| RPL31P10 | TAL1      | LOC642755 | PLAG1     | KIAA1881  | DNAJC21 |
| RPL35    | TAX1BP3   | LOC642769 | PLCE1     | KIAA1920  | DNAJC22 |
| RPL36    | TBC1D10C  | LOC642812 | PLCG1     | KIAA2010  | DNAJC24 |
| RPRD2    | TBC1D19   | LOC642828 | PLD3      | KIF12     | DNAJC25 |
| RPS15A   | TBRG1     | LOC642889 | PLEC1     | KIF20A    | DNAJC30 |
| RPS27    | TBXAS1    | LOC642947 | PLEKHA4   | KIF3C     | DNALI1  |
| RPS28    | TEX13A    | LOC642968 | PLEKHA9   | KIF7      | DNHL1   |
| RPS6KB1  | TFDP1     | LOC642981 | PLEKHF2   | KIFC2     | DNM2    |
| RPTOR    | TFDP2     | LOC643011 | PLEKHM1   | KISS1     | DNMT3A  |
| RPUSD2   | TFE3      | LOC643187 | PLK1      | KIT       | DNMT3B  |
| RQCD1    | TFF3      | LOC643373 | PLK4      | KLC1      | DNTT    |
| RRP15    | THRA      | LOC643382 | PLLP      | KLF4      | DOCK1   |
| RSPO1    | THRAP5    | LOC643446 | PLOD1     | KLHL36    | DOCK2   |
| RSPO2    | TIMD4     | LOC643509 | PLS1      | KLHL5     | DOCK3   |
| RUNX3    | TJP3      | LOC643534 | PLTP      | KMO       | DOK4    |
| S100A13  | TLR4      | LOC643768 | PLXNA3    | KNG1      | DOK5    |
| S100A3   | TLR5      | LOC643772 | PLXNB2    | KNTC1     | DOLPP1  |
| SAFB     | TMC8      | LOC643882 | PMP22     | KPNB1     | DONSON  |
| SAMD4B   | TMCC2     | LOC643897 | POLD1     | KRAS      | DPAGT1  |
| SAP30BP  | TMCO6     | LOC643905 | POLD2     | KRIT1     | DPEP3   |
| SAR1A    | TMED10    | LOC644029 | POLE3     | KRT17     | DPF2    |
| SBSN     | TMED9     | LOC644126 | POLG      | KRT222    | DPH3    |
| SCARNA16 | TMEM100   | LOC644128 | POLR3C    | KRT24     | DPH5    |
| SCARNA3  | TMEM117   | LOC644132 | POLR3K    | KRT75     | DPM2    |
| SCD5     | TMEM119   | LOC644162 | POLS      | KRTAP10-2 | DPM3    |
| SCN2B    | TMEM137   | LOC644250 | POM121L4P | KRTAP4-8  | DPP4    |
| SCRG1    | TMEM191C  | LOC644343 | POMGNT1   | L1CAM     | DPP7    |
| SCUBE3   | TMEM204   | LOC644353 | POMT1     | LAMA3     | DPP9    |
| SCYL2    | TMEM26    | LOC644500 | PPAPDC2   | LAMB3     | DPPA2   |
| SCYL3    | TMEM33    | LOC644511 | PPARD     | LAMC3     | DPPA3   |
| SDCCAG1  | TMEM4     | LOC644584 | PPIF      | LANCL1    | DPPA4   |
| SDF2     | TMEM43    | LOC644590 | PPIL5     | LAPTM5    | DPY19L3 |
| SDHD     | TMEM8     | LOC644591 | PPM1A     | LARP4     | DPY30   |
| SDK1     | TMIE      | LOC644619 | PPP1CA    | LASS1     | DPYS    |
| SEC23A   | TMPRSS9   | LOC644642 | PPP1R10   | LASS2     | DPYSL4  |
| SEC31A   | TNF       | LOC644686 | PPP1R12C  | LAT2      | DRD1IP  |
| SEMA3B   | TNFAIP8L3 | LOC644689 | PPP1R14A  | LAYN      | DRG1    |
| SEMA3C   | TNFRSF11B | LOC644733 | PPP1R3F   | LBA1      | DSCC1   |
| SEMA4B   | TNFRSF6B  | LOC644738 | PPP1R8    | LBP       | DSCR1L1 |
| SEMA6C   | TNPO2     | LOC644949 | PPP1R9A   | LBR       | DSCR6   |
| SEMA6D   | TOMM7     | LOC644990 | PPP2R2D   | LBX2      | DSE     |
| SEMA7A   | TOP1      | LOC644992 | PPP3CB    | LCAT      | DTD1    |
| SEP15    | TOP1P1    | LOC645094 | PPP3CC    | LCMT2     | DTNA    |
| SEPT1    | TOP1P2    | LOC645098 | PQBP1     | LCN12     | DTNBP1  |
| SERHL    | TOR1A     | LOC645128 | PQLC2     | LDOC1     | DTWD1   |
| SERINC3  | TPD52     | LOC645289 | PRIC285   | LEAP-2    | DTWD2   |
| SERPINE3 | TPK1      | LOC645312 | PRKCA     | LECT2     | DTX2    |
| SETBP1   | TRAF3IP1  | LOC645330 | PRKCB     | LEMD2     | DTX3L   |
| SF1      | TRAPPC6B  | LOC645362 | PRKCB1    | LENG8     | DULLARD |



|          |         |           |           |             |          |
|----------|---------|-----------|-----------|-------------|----------|
| SF3A1    | TRIM32  | LOC645452 | PRKCH     | LEPR        | DUSP11   |
| SF3B2    | TRIM39  | LOC645478 | PRKCQ     | LEPROTL1    | DUSP12   |
| SFMBT2   | TRIM58  | LOC645522 | PRMT6     | LGALS3BP    | DUSP14   |
| SFRS10   | TRIM62  | LOC645566 | PRMT7     | LGMN        | DUSP26   |
| SFRS12   | TRIM66  | LOC645671 | PRPF19    | LIG1        | DUSP28   |
| SGK      | TRMT12  | LOC645676 | PRPS1     | LILRB3      | DUSP6    |
| SGK1     | TRPA1   | LOC645726 | PRPS2     | LIMK1       | DYNC1H1  |
| SGSH     | TSPAN32 | LOC645762 | PRRG4     | LIMS1       | DYNC2LI1 |
| SGSM2    | TTC35   | LOC645848 | PRUNE     | LIN52       | DYRK1B   |
| SGSM3    | TTC9    | LOC645937 | PSAP      | LINCR       | DYSF     |
| SH2B1    | TTL7    | LOC646044 | PSEN2     | LIPA        | DZIP1    |
| SH3BP5   | TTY11   | LOC646109 | PSG5      | LIPC        | E2F5     |
| SHROOM2  | TTY5    | LOC646214 | PSMB8     | LIX1L       | E2F7     |
| SIGLEC6  | TUBAL3  | LOC646272 | PSMC6     | LLGL1       | EBI3     |
| SIRT4    | TUBB1   | LOC646276 | PSMD4     | LMAN2       | ECD      |
| SIVA     | TYW1B   | LOC646330 | PSMG4     | LMO2        | ECEL1    |
| SIVA1    | UBE2H   | LOC646346 | PTCD1     | LMO3        | ECGF1    |
| SLC12A5  | UBP1    | LOC646482 | PTGFR     | LNX2        | ECH1     |
| SLC15A2  | UBTD2   | LOC646483 | PTGR2     | LOC10012789 | ECHDC2   |
| SLC1A6   | UCP3    | LOC646547 | PTMS      | LOC10012801 | ECM1     |
| SLC22A11 | UFC1    | LOC646576 | PTN       | LOC10012833 | ECOP     |
| SLC26A8  | ULBP2   | LOC646585 | PTPN23    | LOC10012842 | EDEM1    |
| SLC2A5   | UNC13D  | LOC646665 | PTPN3     | LOC10012865 | EDG1     |
| SLC2A8   | UNC84A  | LOC646672 | PTRH1     | LOC10012869 | EDG4     |
| SLC35F5  | UPK3A   | LOC646675 | PTS       | LOC10012891 | EDIL3    |
| SLC39A2  | UPP2    | LOC646743 | PTTG1     | LOC10012897 | EDN1     |
| SLC6A4   | UROS    | LOC646836 | PTTG3P    | LOC10012912 | EDNRB    |
| SLC7A4   | USP45   | LOC646908 | PUS7      | LOC10012921 | EED      |
| SLCO6A1  | VAV1    | LOC646916 | PZP       | LOC10012946 | EEF1A2   |
| SMAD3    | VDAC1   | LOC646936 | QARS      | LOC10012955 | EEF1B2   |
| SMAD9    | VN1R1   | LOC646942 | QDPR      | LOC10012958 | EEF1E1   |
| SMCR7L   | VNN2    | LOC646982 | QPRT      | LOC10012958 | EFCAB4A  |
| SMG5     | VPREB1  | LOC646996 | RAB11FIP3 | LOC10012959 | EFCBP1   |
| SMO      | VPS26B  | LOC647000 | RAB11FIP5 | LOC10012988 | EFEMP1   |
| SMPX     | VPS29   | LOC647060 | RAB18     | LOC10012989 | EFHD2    |
| SMTNL2   | VPS36   | LOC647104 | RAB26     | LOC10012998 | EFNA1    |
| SMUG1    | VPS37A  | LOC647229 | RAB7L1    | LOC10013011 | EFNB2    |
| SND1     | VSIG4   | LOC647276 | RAB8A     | LOC10013028 | EFNB3    |
| SNHG11   | VWC2    | LOC647357 | RABAC1    | LOC10013029 | EFS      |
| SNORA24  | WBSCR22 | LOC647363 | RABGAP1   | LOC10013050 | EGFLAM   |
| SNORA25  | WDR25   | LOC647389 | RABGEF1   | LOC10013051 | EGR1     |
| SNORA3   | WDR44   | LOC647509 | RANGAP1   | LOC10013092 | EHD1     |
| SNORA32  | WDR5    | LOC647570 | RASA1     | LOC10013098 | EHD4     |
| SNORA52  | WDR87   | LOC647588 | RASGRP1   | LOC10013113 | EHHADH   |
| SNORA55  | WDR89   | LOC647704 | RASGRP4   | LOC10013144 | EIF1AX   |
| SNORA6   | WFDC1   | LOC647718 | RASSF6    | LOC10013147 | EIF1B    |
| SNORA62  | XLKD1   | LOC647834 | RASSF7    | LOC10013151 | EIF2AK1  |
| SNORA66  | YIPF1   | LOC647854 | RBBP6     | LOC10013157 | EIF2B3   |
| SNORA70C | YOD1    | LOC647910 | RBBP7     | LOC10013160 | EIF2S3   |
| SNORA7A  | YPEL4   | LOC647965 | RBM12     | LOC10013171 | EIF3I    |

|            |         |           |          |             |          |
|------------|---------|-----------|----------|-------------|----------|
| SNORD104   | YTHDF1  | LOC648059 | RBM39    | LOC10013173 | EIF3K    |
| SNORD13    | ZBED4   | LOC648153 | RBM5     | LOC10013183 | EIF3M    |
| SNORD14A   | ZBTB45  | LOC648226 | RBM6     | LOC10013197 | EIF4E    |
| SNORD32A   | ZBTB8A  | LOC648517 | RBP7     | LOC10013206 | EIF4E3   |
| SNORD56    | ZC3H7A  | LOC648600 | RC3H2    | LOC10013211 | EIF4EBP1 |
| SNORD57    | ZEB2    | LOC648659 | RCBTB2   | LOC10013211 | ELF1     |
| SNORD6     | ZFAND3  | LOC648691 | RCN3     | LOC10013232 | ELF3     |
| SNORD65    | ZFP3    | LOC648732 | RDBP     | LOC10013236 | ELF5     |
| SNUPN      | ZFP92   | LOC648742 | RELL2    | LOC10013242 | ELL      |
| SNX13      | ZFPL1   | LOC648744 | RENBP    | LOC10013247 | ELL2     |
| SNX6       | ZFPM1   | LOC648749 | RERG     | LOC10013249 | ELOVL1   |
| SOD3       | ZMAT2   | LOC648852 | RFC5     | LOC10013272 | ELP4     |
| SOS1       | ZNF131  | LOC648874 | RFXANK   | LOC10013277 | ELTD1    |
| SOX17      | ZNF140  | LOC648921 | RHBDL2   | LOC10013279 | EMD      |
| SP6        | ZNF250  | LOC649044 | RHOB     | LOC10013283 | EMG1     |
| SPAG16     | ZNF37A  | LOC649071 | RHOBTB3  | LOC10013293 | EMILIN2  |
| SPATA20    | ZNF438  | LOC649076 | RHOC     | LOC10013294 | EML1     |
| SPATA22    | ZNF460  | LOC649160 | RHOD     | LOC10013305 | ENAH     |
| SPCS1      | ZNF48   | LOC649214 | RHOU     | LOC10013343 | ENDOD1   |
| SPDYA      | ZNF496  | LOC649238 | RHPN2    | LOC10013351 | ENO2     |
| SPIN2B     | ZNF579  | LOC649431 | RIOK3    | LOC10013355 | ENO3     |
| SPNS3      | ZNF583  | LOC649456 | RMI1     | LOC10013357 | ENOPH1   |
| SPPL2B     | ZNF585B | LOC649495 | RMST     | LOC10013367 | ENPP2    |
| SPPL3      | ZNF597  | LOC649497 | RNASEH2B | LOC10013374 | ENSA     |
| SPRR1B     | ZNF696  | LOC649503 | RNF122   | LOC10013382 | ENTPD4   |
| SPTBN2     | ZNF7    | LOC649540 | RNF126   | LOC10013384 | ENTPD5   |
| SRCAP      | ZNF75A  | LOC649711 | RNF141   | LOC10013397 | EP400    |
| SRD5A2L2   | ZNF8    | LOC649801 | RNF144   | LOC10013404 | EPAS1    |
| SRM        | ZSCAN29 | LOC649821 | RNF169   | LOC10013410 | EPB41L5  |
| SRP14P1    | ZSWIM5  | LOC649853 | RNF181   | LOC10013426 | EPHA1    |
| SRP68      | ZSWIM7  | LOC649859 | RNF185   | LOC10013426 | EPHA2    |
| SRRD       | ZZZ3    | LOC649873 | RNF214   | LOC10013453 | EPHB1    |
| SRRM2      |         | LOC650034 | RNF26    | LOC10013463 | EPHB2    |
| SSNA1      |         | LOC650132 | RNF8     | LOC10013468 | EPHB6    |
| SST        |         | LOC650157 | RNFT1    | LOC134505   | EPM2AIP1 |
| ST6GALNAC2 |         | LOC650254 | RNPC3    | LOC143543   | EPN3     |
| STAM2      |         | LOC650280 | RNPEPL1  | LOC145853   | EPO      |
| STK17A     |         | LOC650293 | RNPS1    | LOC146177   | EPOR     |
| STK32B     |         | LOC650346 | RNU105C  | LOC146909   | EPSTI1   |
| STON1      |         | LOC650491 | RNU1-3   | LOC147710   | ERAL1    |
| STS        |         | LOC650628 | RNU1A3   | LOC148413   | ERBB3    |
| STX19      |         | LOC650681 | RNU6-1   | LOC150223   | ERC1     |
| STX7       |         | LOC650840 | RNU6-15  | LOC169834   | ERCC5    |
| STXBP2     |         | LOC650889 | RNY5     | LOC199800   | ERCC6L   |
| SURF6      |         | LOC650909 | RPL14L   | LOC202227   | ERCC8    |
| SYNM       |         | LOC650930 | RPL34    | LOC205251   | ERF      |
| SYNPO2     |         | LOC651029 | RPL36A   | LOC221710   | ERGIC1   |
| SYNPR      |         | LOC651112 | RPPH1    | LOC255326   | ERH      |
| SYTL3      |         | LOC651285 | RPS2     | LOC255783   | ERI1     |
| TAF1L      |         | LOC651296 | RPS21    | LOC283788   | ERI3     |

|                 |           |          |           |          |
|-----------------|-----------|----------|-----------|----------|
| TANC1           | LOC651302 | RPS27A   | LOC284422 | ERO1L    |
| TARDBP          | LOC651986 | RPS27L   | LOC284620 | ERP27    |
| TAX1BP1         | LOC651987 | RPS4X    | LOC285500 | ERVK6    |
| TBC1D13         | LOC652002 | RPS4Y2   | LOC285548 | ESAM     |
| TBC1D3G         | LOC652175 | RPS6KA4  | LOC285620 | ESCO1    |
| TBC1D3I         | LOC652185 | RPUSD3   | LOC285900 | ESRRB    |
| TBCC            | LOC652322 | RRAD     | LOC286157 | ETFB     |
| TBX19           | LOC652456 | RRAGA    | LOC286467 | ETNK1    |
| TCL6            | LOC652545 | RRAGC    | LOC338799 | ETNK2    |
| TCP1            | LOC652565 | RRAGD    | LOC339047 | ETV4     |
| TECPR1          | LOC652627 | RRAS     | LOC344741 | ETV5     |
| TFAP2B          | LOC652694 | RRM2     | LOC346950 | EXOC6    |
| TGFBRAP1        | LOC652704 | RRP7A    | LOC374443 | EXOG     |
| TGS1            | LOC652712 | RSPH3    | LOC387647 | EXOSC1   |
| THAP11          | LOC652722 | RSPRY1   | LOC387686 | EXOSC5   |
| THBS3           | LOC652768 | RTN1     | LOC387763 | EXOSC7   |
| THEM2           | LOC653082 | RUNX2    | LOC387841 | EXOSC8   |
| THG1L           | LOC653086 | RUSC2    | LOC387882 | EXOSC9   |
| THSD3           | LOC653147 | S100A10  | LOC388275 | EXTL3    |
| TIMM10          | LOC653162 | S100A14  | LOC388692 | EYA3     |
| TIMM23          | LOC653199 | S1PR3    | LOC388820 | EZH2     |
| TINAGL1         | LOC653232 | SAMD14   | LOC388907 | EZR      |
| TLCD1           | LOC653234 | SAR1B    | LOC389286 | F10      |
| TLN2            | LOC653270 | SBDS     | LOC389293 | F11R     |
| TM9SF3          | LOC653284 | SBDSP    | LOC389662 | F12      |
| TMCC3           | LOC653324 | SBNO2    | LOC389765 | F2R      |
| TMCO7           | LOC653342 | SCAMP2   | LOC390414 | F3       |
| TMEM104         | LOC653354 | SCAND3   | LOC390530 | F7       |
| TMEM126A        | LOC653419 | SDCBP    | LOC390705 | FABP5    |
| TMEM160         | LOC653489 | SDCBP2   | LOC391044 | FABP5L2  |
| TMEM25          | LOC653513 | SDHAF1   | LOC391075 | FABP5L3  |
| TMEM30A         | LOC653520 | SEC13    | LOC391169 | FAF1     |
| TMEM30B         | LOC653590 | SEC14L5  | LOC391352 | FAH      |
| TMEM35          | LOC653650 | SEC22B   | LOC391532 | FAIM     |
| TMEM39A         | LOC653658 | SEC61A1  | LOC391833 | FAM105A  |
| TMEM40          | LOC653696 | SENP5    | LOC392221 | FAM107B  |
| TMEM41B         | LOC653717 | SEPT4    | LOC392288 | FAM108B1 |
| TMEM79          | LOC653720 | SEPT7    | LOC392787 | FAM109A  |
| TMEM88          | LOC653752 | SERPINB1 | LOC399748 | FAM110A  |
| TMEM99          | LOC653773 | SETD1A   | LOC399959 | FAM110B  |
| TMOD3           | LOC653829 | SETDB1   | LOC400163 | FAM117B  |
| TMPRSS13        | LOC653881 | SETX     | LOC400389 | FAM119A  |
| TMUB2           | LOC654109 | SFRP1    | LOC400713 | FAM122A  |
| TncRNA          | LOC654123 | SFRS15   | LOC400836 | FAM123A  |
| TNFSF12-TNFSF13 | LOC654135 | SFRS16   | LOC401074 | FAM124A  |
| TNRC9           | LOC654260 | SFRS5    | LOC401357 | FAM124B  |
| TOR1B           | LOC654350 | SGSM1    | LOC401397 | FAM126A  |
| TOR3A           | LOC654433 | SH2B3    | LOC401431 | FAM127A  |
| TP63            | LOC727815 | SH2D4A   | LOC401677 | FAM129A  |
| TP73L           | LOC727820 | SH3BP1   | LOC402509 | FAM133A  |

|         |           |          |           |          |
|---------|-----------|----------|-----------|----------|
| TPCN1   | LOC727825 | SH3KBP1  | LOC402560 | FAM134A  |
| TPPP3   | LOC727899 | SH3YL1   | LOC402694 | FAM134B  |
| TPRKB   | LOC727937 | SHB      | LOC440059 | FAM136A  |
| TRAPPC1 | LOC727947 | SHROOM4  | LOC440080 | FAM136B  |
| TRAPPC3 | LOC728105 | SIK1     | LOC440313 | FAM13A   |
| TREM1   | LOC728128 | SKA1     | LOC440348 | FAM149A  |
| TRIL    | LOC728138 | SLC10A4  | LOC440396 | FAM149B1 |
| TRIM17  | LOC728139 | SLC13A4  | LOC440563 | FAM150A  |
| TRIM41  | LOC728160 | SLC15A3  | LOC440595 | FAM151A  |
| TRIM78P | LOC728181 | SLC22A18 | LOC440928 | FAM159B  |
| TRIP11  | LOC728208 | SLC24A3  | LOC441019 | FAM160A2 |
| TRMU    | LOC728211 | SLC25A22 | LOC441179 | FAM161A  |
| TRNP1   | LOC728285 | SLC25A3  | LOC441237 | FAM162B  |
| TSGA10  | LOC728288 | SLC25A5  | LOC441268 | FAM164A  |
| TSPAN10 | LOC728310 | SLC2A1   | LOC441294 | FAM165B  |
| TSPAN3  | LOC728457 | SLC2A10  | LOC441377 | FAM167A  |
| TTC14   | LOC728467 | SLC30A1  | LOC441505 | FAM174B  |
| TTC23   | LOC728553 | SLC30A7  | LOC442041 | FAM176A  |
| TTC26   | LOC728558 | SLC31A1  | LOC54103  | FAM177A1 |
| TTC28   | LOC728564 | SLC35B2  | LOC553137 | FAM179A  |
| TTC8    | LOC728565 | SLC35C1  | LOC553158 | FAM181B  |
| TTY6    | LOC728672 | SLC35C2  | LOC554235 | FAM188B  |
| TWSG1   | LOC728711 | SLC35D2  | LOC55908  | FAM195A  |
| TXNL1   | LOC728779 | SLC35D3  | LOC641765 | FAM20C   |
| TXNRD2  | LOC728802 | SLC38A7  | LOC641825 | FAM24B   |
| TYW1    | LOC728903 | SLC44A3  | LOC641942 | FAM26A   |
| U2AF1   | LOC728908 | SLC44A4  | LOC642076 | FAM35A   |
| UBAP2   | LOC728973 | SLC7A8   | LOC642113 | FAM38A   |
| UBASH3B | LOC728975 | SLC9A6   | LOC642160 | FAM38B   |
| UBE1    | LOC728992 | SLCO2A1  | LOC642267 | FAM3A    |
| UBE2F   | LOC729008 | SLFN13   | LOC642282 | FAM3C    |
| UBE2QP2 | LOC729081 | SLIT2    | LOC642377 | FAM44B   |
| UBE2W   | LOC729090 | SMA4     | LOC642399 | FAM46A   |
| UBE3C   | LOC729101 | SMAD5    | LOC642469 | FAM46B   |
| UBQLNL  | LOC729120 | SMARCD3  | LOC642489 | FAM46C   |
| UBR2    | LOC729252 | SMC6     | LOC642530 | FAM49B   |
| UBR3    | LOC729313 | SMG7     | LOC642567 | FAM54A   |
| UCHL5   | LOC729340 | SMURF1   | LOC642590 | FAM54B   |
| ULK1    | LOC729348 | SNORA12  | LOC642726 | FAM57A   |
| ULK2    | LOC729350 | SNORA16A | LOC642780 | FAM60A   |
| UNC93B1 | LOC729417 | SNORA41  | LOC642852 | FAM62C   |
| UPK2    | LOC729438 | SNORA67  | LOC643031 | FAM63A   |
| UPK3B   | LOC729446 | SNORD35B | LOC643047 | FAM64A   |
| UPRT    | LOC729510 | SNORD3D  | LOC643145 | FAM65B   |
| UQCRFS1 | LOC729562 | SNORD52  | LOC643313 | FAM69A   |
| URM1    | LOC729580 | SNORD89  | LOC643396 | FAM71E1  |
| USF1    | LOC729603 | SNORD96B | LOC643438 | FAM71F1  |
| USF2    | LOC729666 | SNRNP200 | LOC643452 | FAM72A   |
| USP22   | LOC729692 | SNRNP48  | LOC643665 | FAM75B   |
| UTP14A  | LOC729769 | SNRPD1   | LOC643831 | FAM7A1   |

|         |           |         |           |         |
|---------|-----------|---------|-----------|---------|
| VAPB    | LOC729793 | SNRPD2  | LOC643836 | FAM83B  |
| VEZF1   | LOC729859 | SNRPF   | LOC643933 | FAM84B  |
| VGLL1   | LOC729885 | SNX33   | LOC644033 | FAM86A  |
| VGLL4   | LOC729933 | SOAT1   | LOC644086 | FAM89A  |
| VIPR2   | LOC729970 | SOCS6   | LOC644150 | FAM89B  |
| VIT     | LOC729985 | SOD2    | LOC644191 | FAM8A1  |
| VPS11   | LOC730045 | SON     | LOC644297 | FAM90A1 |
| VPS13D  | LOC730077 | SORBS1  | LOC644310 | FANCD2  |
| VPS16   | LOC730176 | SOSTDC1 | LOC644322 | FANCL   |
| VPS33B  | LOC730187 | SOX12   | LOC644464 | FAR2    |
| VPS35   | LOC730234 | SP1     | LOC644482 | FARP1   |
| VPS37C  | LOC730243 | SP3     | LOC644617 | FAS     |
| VPS4B   | LOC730254 | SP4     | LOC644761 | FASN    |
| WAC     | LOC730255 | SPC25   | LOC644914 | FASTK   |
| WASL    | LOC730256 | SPCS3   | LOC644919 | FAT3    |
| WDR19   | LOC730291 | SPG11   | LOC644934 | FBL     |
| WDR24   | LOC730357 | SPG20   | LOC645001 | FBLN1   |
| WDR61   | LOC730387 | SPIN4   | LOC645118 | FBLN5   |
| WDR73   | LOC730517 | SPINK5  | LOC645195 | FBLN7   |
| WHSC2   | LOC730534 | SPRY1   | LOC645217 | FBN2    |
| WIP11   | LOC730740 | SRC     | LOC645251 | FBN3    |
| WISP1   | LOC730841 | SRD5A3  | LOC645313 | FBP1    |
| WIZ     | LOC730908 | SRF     | LOC645351 | FBRS    |
| WNT10A  | LOC730990 | SRGAP2  | LOC645430 | FBS1    |
| WNT11   | LOC730994 | SRI     | LOC645609 | FBXL10  |
| WNT4    | LOC731139 | SRPR    | LOC645897 | FBXL11  |
| WNT6    | LOC731196 | SRPX    | LOC645979 | FBXL16  |
| XAB2    | LOC731724 | SRRM1   | LOC646089 | FBXL2   |
| XKR4    | LOC731777 | SRXN1   | LOC646100 | FBXL3   |
| XKR8    | LOC731789 | SRY     | LOC646111 | FBXO11  |
| XPC     | LOC732146 | SSBP4   | LOC646197 | FBXO17  |
| YIPF5   | LOC732424 | SSH2    | LOC646282 | FBXO21  |
| YPEL1   | LOC92659  | SSRP1   | LOC646332 | FBXO22  |
| YWHAH   | LPCAT3    | SSTR2   | LOC646347 | FBXO28  |
| ZBED2   | LPIN3     | STAP2   | LOC646403 | FBXO31  |
| ZBTB4   | LPPR2     | STAR    | LOC646452 | FBXO34  |
| ZBTB5   | LRAP      | STARD7  | LOC646508 | FBXO6   |
| ZBTB7C  | LRDD      | STAT3   | LOC646527 | FBXO7   |
| ZC3H11B | LRP5L     | STIL    | LOC646630 | FCGR3A  |
| ZC3H12B | LRPPRC    | STK10   | LOC646674 | FCGRT   |
| ZDHHC2  | LRRC14    | STK19   | LOC646688 | FDFT1   |
| ZDHHC20 | LRRC37B2  | STK3    | LOC646783 | FDPS    |
| ZDHHC24 | LRRC47    | STK35   | LOC646784 | FDX1    |
| ZDHHC6  | LRRC50    | STMN3   | LOC646821 | FEM1C   |
| ZDHHC8  | LRRC59    | STRA6   | LOC646845 | FEN1    |
| ZDHHC8P | LRRCC1    | STRN3   | LOC646981 | FER1L3  |
| ZFP161  | LRRK2     | STS-1   | LOC646993 | FERMT1  |
| ZFP36L1 | LRRTM4    | STX12   | LOC647042 | FERMT2  |
| ZFYVE1  | LSM2      | STX2    | LOC647108 | FEZ1    |
| ZFYVE20 | LSM5      | STX5    | LOC647307 | FGA     |

|         |          |          |           |          |
|---------|----------|----------|-----------|----------|
| ZMIZ2   | LTBP2    | SUMO3    | LOC647322 | FGB      |
| ZNF12   | LUC7L    | SUPT5H   | LOC647786 | FGD2     |
| ZNF252  | LUC7L2   | SV2B     | LOC648213 | FGD4     |
| ZNF271  | LUZP2    | SYDE1    | LOC648390 | FGD5     |
| ZNF282  | LYPLA2   | SYF2     | LOC648526 | FGF12    |
| ZNF292  | LYRM2    | SYMPK    | LOC648682 | FGF13    |
| ZNF304  | LYRM7    | SYNCRIP  | LOC648740 | FGF16    |
| ZNF32   | MACROD1  | SYNJ2    | LOC648771 | FGF19    |
| ZNF33A  | MAFG     | SYPL2    | LOC648982 | FGF2     |
| ZNF33B  | MAGED4B  | SYS1     | LOC649009 | FGF8     |
| ZNF341  | MAGEL2   | SYT17    | LOC649143 | FGFR4    |
| ZNF358  | MAK      | SYT7     | LOC649365 | FGG      |
| ZNF385A | MAMDC4   | TADA1L   | LOC649999 | FGGY     |
| ZNF410  | MAN2A1   | TADA2B   | LOC650028 | FHDC1    |
| ZNF416  | MAN2C1   | TAF1C    | LOC650546 | FHL2     |
| ZNF417  | MANEA    | TBC1D10A | LOC650803 | FHOD3    |
| ZNF432  | MAP1D    | TBC1D14  | LOC650832 | FIBP     |
| ZNF471  | MAP1LC3B | TBC1D2   | LOC651198 | FILIP1   |
| ZNF511  | MAP3K14  | TBC1D3C  | LOC651333 | FKBP11   |
| ZNF529  | MAP3K3   | TBC1D7   | LOC651568 | FKBP14   |
| ZNF548  | MAPBPIP  | TBC1D9B  | LOC651575 | FKBP15   |
| ZNF559  | MAPKSP1  | TBK1     | LOC651576 | FKBP1B   |
| ZNF564  | MAPT     | TBL2     | LOC651621 | FKBP2    |
| ZNF580  | MARCH5   | TBPL1    | LOC651659 | FKBP3    |
| ZNF586  | MARCKS   | TCEA2    | LOC651697 | FKBP4    |
| ZNF587  | MARK3    | TCF25    | LOC651894 | FKBP9L   |
| ZNF610  | MAX      | TCF4     | LOC652324 | FKSG30   |
| ZNF641  | MAZ      | TDH      | LOC652458 | FLAD1    |
| ZNF646  | MBIP     | TDRD1    | LOC652669 | FLJ10081 |
| ZNF650  | MBLAC2   | TDRKH    | LOC652790 | FLJ10088 |
| ZNF703  | MCM3APAS | TEX15    | LOC652819 | FLJ10916 |
| ZNF749  | MDC1     | TFB2M    | LOC652900 | FLJ12078 |
| ZNF76   | MDM2     | TGFB1I1  | LOC653071 | FLJ13305 |
| ZNF776  | MEA1     | TGM1     | LOC653103 | FLJ14712 |
| ZNF785  | MED11    | THAP7    | LOC653158 | FLJ20125 |
| ZNF79   | MED17    | THEM4    | LOC653375 | FLJ20254 |
| ZNF807  | MED26    | THNSL2   | LOC653382 | FLJ20273 |
| ZNF813  | MED9     | THOC2    | LOC653458 | FLJ20674 |
| ZNRF2   | MEGF8    | THOC4    | LOC653498 | FLJ20699 |
| ZNRF3   | MEPCE    | THRSP    | LOC653609 | FLJ20920 |
| ZSCAN5A | METAP2   | TICAM2   | LOC653610 | FLJ21986 |
|         | METRNL   | TIGD2    | LOC653635 | FLJ22184 |
|         | METT10D  | TIMM8A   | LOC653874 | FLJ22536 |
|         | METT5D1  | TIMP1    | LOC653879 | FLJ22662 |
|         | MEX3B    | TIPARP   | LOC653968 | FLJ22795 |
|         | MFI2     | TM6SF2   | LOC654042 | FLJ25404 |
|         | MFSD2    | TM9SF1   | LOC654074 | FLJ30092 |
|         | MGC12982 | TM9SF4   | LOC654096 | FLJ30428 |
|         | MGC13005 | TMC6     | LOC654164 | FLJ35024 |
|         | MGC27348 | TMCO3    | LOC654174 | FLJ35767 |

|           |          |           |          |
|-----------|----------|-----------|----------|
| MGC42367  | TMED4    | LOC654194 | FLJ38717 |
| MGC42630  | TMED7    | LOC727726 | FLJ39653 |
| MGC48637  | TMEM127  | LOC727768 | FLJ40194 |
| MGC57359  | TMEM131  | LOC727848 | FLJ40504 |
| MGRN1     | TMEM135  | LOC727908 | FLJ41481 |
| MIA3      | TMEM14C  | LOC727987 | FLJ42957 |
| MIER2     | TMEM158  | LOC728014 | FLJ44379 |
| MIF       | TMEM163  | LOC728034 | FLJ45244 |
| MIR1185-1 | TMEM177  | LOC728037 | FLJ45337 |
| MIR1253   | TMEM181  | LOC728226 | FLJ90231 |
| MIR1282   | TMEM185A | LOC728247 | FLNB     |
| MIR129-2  | TMEM188  | LOC728290 | FLNC     |
| MIR1909   | TMEM189  | LOC728324 | FLRT2    |
| MIR193A   | TMEM192  | LOC728362 | FLRT3    |
| MIR219-2  | TMEM2    | LOC728431 | FLVCR1   |
| MIR29B1   | TMEM208  | LOC728441 | FMO1     |
| MIR330    | TMEM222  | LOC728476 | FMO4     |
| MIR345    | TMEM51   | LOC728533 | FNBP1L   |
| MIR373    | TMEM52   | LOC728678 | FNDC5    |
| MIR383    | TMEM59   | LOC728723 | FNIP1    |
| MIR635    | TMEM70   | LOC728728 | FOLH1    |
| MIR98     | TMEM93   | LOC728743 | FOLR1    |
| MIS12     | TMEM98   | LOC728755 | FOS      |
| MLLT4     | TMF1     | LOC728787 | FOSB     |
| MLX       | TMPO     | LOC728809 | FOSL1    |
| MMAA      | TMSB10   | LOC728835 | FOXA1    |
| MMP3      | TMUB1    | LOC729009 | FOXA2    |
| MMP7      | TNFAIP1  | LOC729020 | FOXD1    |
| MOAP1     | TNFAIP3  | LOC729021 | FOXJ2    |
| MOCS3     | TNFSF15  | LOC729102 | FOXK1    |
| MOGAT1    | TNK2     | LOC729137 | FOXL2    |
| MORC2     | TNKS1BP1 | LOC729351 | FOXO3    |
| MORN2     | TOB2     | LOC729366 | FOXO4    |
| MOSPD1    | TOMM34   | LOC729409 | FOXP1    |
| MPG       | TOMM40L  | LOC729559 | FOXQ1    |
| MPI       | TOMM5    | LOC729679 | FRAS1    |
| MPND      | TOP2A    | LOC729742 | FRAT2    |
| MPPE1     | TOP3B    | LOC729760 | FREM2    |
| MPPED1    | TOR1AIP2 | LOC729776 | FRMD6    |
| MPV17L    | TRAFD1   | LOC729806 | FRMD8    |
| MRC2      | TRAM1    | LOC729816 | FRYL     |
| MRPL17    | TRAM2    | LOC729887 | FSCN1    |
| MRPL19    | TRIM11   | LOC729952 | FSD1     |
| MRPL34    | TRIM26   | LOC730024 | FST      |
| MRPL41    | TRIM5    | LOC730032 | FSTL1    |
| MRPS27    | TRIM56   | LOC730101 | FTCD     |
| MRPS33    | TRIM6    | LOC730102 | FTHL12   |
| MSH3      | TRIM8    | LOC730110 | FTSJ1    |
| MSH5      | TRIOBP   | LOC730183 | FUK      |
| MSH6      | TROVE2   | LOC730226 | FURIN    |

|            |           |           |           |
|------------|-----------|-----------|-----------|
| MST1R      | TSC22D1   | LOC730246 | FUT1      |
| MT1JP      | TSC22D2   | LOC730284 | FUT4      |
| MT3        | TSKU      | LOC730286 | FUT8      |
| MTBP       | TSNAX     | LOC730535 | FXR1      |
| MTDH       | TSPAN15   | LOC730805 | FXYD1     |
| MTM1       | TSPAN4    | LOC731096 | FXYD5     |
| MTPN       | TSPAN8    | LOC731231 | FXYD7     |
| MTRF1      | TSPYL1    | LOC731542 | FYCO1     |
| MTRF1L     | TSSC4     | LOC731656 | FYN       |
| MUC2       | TTC12     | LOC731915 | FZD2      |
| MUC20      | TTC17     | LOC731950 | FZD3      |
| MUCL1      | TTYH3     | LOC731969 | FZD6      |
| MUDENG     | TUBA1A    | LOC81691  | FZD7      |
| MUL1       | TUBA4A    | LOC85389  | FZR1      |
| MYCBP      | TUG1      | LOC90925  | G0S2      |
| MYH1       | TUSC1     | LOC91431  | G3BP2     |
| MYL12A     | TUSC2     | LOC91664  | G6PD      |
| MYLPF      | TWF2      | LONRF3    | GABARAPL1 |
| MYO3B      | TXNDC14   | LPA       | GABPB2    |
| NADK       | TXNIP     | LPCAT4    | GABRA5    |
| NAGK       | TXNRD1    | LPGAT1    | GABRB3    |
| NANOS1     | U1SNRNPBP | LPHN3     | GABRP     |
| NANP       | U2AF1L4   | LPPR1     | GAD1      |
| NAPA       | UBA1      | LRCH1     | GADD45A   |
| NARG1L     | UBA52     | LRCH4     | GADD45G   |
| NAT11      | UBE2C     | LRFN5     | GAL       |
| NAT2       | UBE2L6    | LRG1      | GAL3ST3   |
| NAT6       | UBE2M     | LRRC16    | GAL3ST4   |
| NBAS       | UBE2Q2    | LRRC16A   | GALC      |
| NBN        | UBE2T     | LRRC16B   | GALM      |
| NBPF1      | UBE4B     | LRRC31    | GALNT10   |
| NBPF15     | UBL3      | LRRC37A   | GALNT12   |
| NCAPD3     | UBL7      | LRRC3B    | GALNT14   |
| NCAPH2     | UBN2      | LRRC6     | GALNT4    |
| NCDN       | UBQLN3    | LRRC8D    | GALNTL1   |
| NCF1       | UBXN11    | LRRC8E    | GALR1     |
| NCRNA00094 | UBXN8     | LRRN2     | GALR2     |
| NCSTN      | UCHL3     | LSAMP     | GALT      |
| NDE1       | UCN       | LSM14A    | GAMT      |
| NDFIP1     | UCP1      | LSMD1     | GAP43     |
| NDUFA4L2   | UGCG      | LSP1      | GAPDHL6   |
| NDUFAF1    | UGCGL2    | LTA4H     | GARNL4    |
| NDUFB1     | UNC119B   | LTB       | GARS      |
| NDUFB2     | UNKL      | LUZP1     | GART      |
| NDUFB5     | UQCRC2    | LXN       | GATA3     |
| NDUFS8     | UQCRH     | LY96      | GATA4     |
| NDUFV3     | URG4      | LYRM1     | GBA       |
| NEB        | USHBP1    | LYRM5     | GBF1      |
| NEIL1      | USP1      | LYZ       | GBGT1     |
| NEIL2      | USP14     | LZTFL1    | GBP2      |



|          |          |           |          |
|----------|----------|-----------|----------|
| NEK1     | USP16    | M6PRBP1   | GBP4     |
| NEK10    | USP21    | MACF1     | GBX2     |
| NFATC2IP | USP35    | MAD1L1    | GC       |
| NFE2L2   | USP42    | MAF       | GCDH     |
| NFYC     | USP49    | MAFB      | GCGR     |
| NGB      | USP5     | MAGEE1    | GCH1     |
| NHLRC2   | USP6     | MAGEF1    | GCHFR    |
| NIT1     | UTP14C   | MAGI2     | GCLM     |
| NKIRAS2  | UTY      | MAK10     | GCNT1    |
| NKRF     | VAMP3    | MAL       | GCNT2    |
| NLK      | VAMP4    | MAMLD1    | GCNT3    |
| NLRP8    | VAV2     | MAN2A2    | GDF3     |
| NMI      | VBP1     | MAOB      | GDI1     |
| NOD2     | VCPIP1   | MAP1S     | GDPD1    |
| NOL7     | VIPR1    | MAP2K5    | GDPD2    |
| NOL8     | VMO1     | MAP2K7    | GEM      |
| NOP14    | VPS13C   | MAP3K10   | GFPT1    |
| NOS2     | VPS18    | MAP3K15   | GFPT2    |
| NOS2A    | VPS39    | MAP3K7IP3 | GFRA1    |
| NOTCH2   | VSNL1    | MAP9      | GFRA2    |
| NOTCH2NL | VWA1     | MAPK14    | GFRA3    |
| NPAS2    | WASF2    | MAPKAPK2  | GGCT     |
| NPAT     | WASPIP   | MAPRE1    | GGNBP2   |
| NPDC1    | WBP5     | MARCH8    | GGPS1    |
| NPHP4    | WBSCR27  | MARCKSL1  | GH1      |
| NR2C2    | WDFY3    | MASP1     | GH2      |
| NR2C2AP  | WDR18    | MASP2     | GHDC     |
| NR3C2    | WDR27    | MAST3     | GHR      |
| NR4A2    | WDR33    | MAST4     | GIN54    |
| NR6A1    | WDR37    | MASTL     | GIT1     |
| NRTN     | WDR51A   | MAT1A     | GIT2     |
| NSFL1C   | WDR51B   | MBD3      | GJA1     |
| NT5C2    | WDR57    | MBL1P1    | GJB1     |
| NUB1     | WDR5B    | MBL2      | GJB2     |
| NUBP1    | WDR6     | MBNL1     | GJC1     |
| NUBP2    | WDR67    | MBP       | GK       |
| NUBPL    | WDR70    | MCAT      | GLA      |
| NUCKS1   | WDR74    | MCCC2     | GLB1L3   |
| NUDT16P  | WIF1     | MCM8      | GLCE     |
| NUDT2    | WIPF1    | MCOLN1    | GLI1     |
| NUDT4    | XAGE2B   | MCOLN2    | GLI2     |
| NUFIP2   | XBP1     | MCOLN3    | GLIPR1L1 |
| NUP133   | XRCC1    | ME1       | GLIPR2   |
| NUP188   | XRCC2    | ME3       | GLIS3    |
| NUP210   | XRCC6    | MEAF6     | GLRX     |
| NXPH4    | XRCC6BP1 | MECR      | GLRX3    |
| NXT1     | YBX1     | MED13     | GLS2     |
| OASL     | YPEL5    | MED14     | GLT25D1  |
| OGDHL    | ZADH2    | MED20     | GLT25D2  |
| OLA1     | ZBED1    | MED21     | GLT8D2   |

|          |         |           |         |
|----------|---------|-----------|---------|
| OPA3     | ZBTB34  | MED25     | GLTPD1  |
| OR10J1   | ZBTB42  | MED29     | GLYATL1 |
| OR1B1    | ZBTB43  | MED6      | GLYCTK  |
| OR1S2    | ZC3H12A | MED8      | GMDS    |
| OR4M1    | ZC3H12C | MEG3      | GMPR    |
| OR51S1   | ZCCHC3  | MEIS3P1   | GNA11   |
| OR52N2   | ZCCHC6  | MESP1     | GNA12   |
| OR52N5   | ZCCHC9  | METAP1    | GNA14   |
| OR6M1    | ZDHHC18 | METT11D1  | GNAQ    |
| OR9A4    | ZDHHC3  | METTL4    | GNE     |
| P2RY11   | ZFAND5  | METTL7A   | GNG10   |
| PABPC5   | ZFC3H1  | METTL7B   | GNG11   |
| PACRGL   | ZFP112  | METTL9    | GNG12   |
| PALM2    | ZFYVE16 | MFAP3L    | GNG4    |
| PAN3     | ZFYVE19 | MFF       | GNG5    |
| PAPD5    | ZFYVE26 | MFGE8     | GNL3    |
| PAPOLG   | ZKSCAN1 | MFHAS1    | GNPTAB  |
| PAPSS2   | ZMIZ1   | MFN1      | GNPTG   |
| PARG     | ZMYM3   | MFSD10    | GOLIM4  |
| PARS2    | ZNF121  | MFSD6L    | GOLPH4  |
| PATE1    | ZNF160  | MGC102966 | GOLSYN  |
| PATL1    | ZNF212  | MGC12965  | GOLT1A  |
| PAX8     | ZNF22   | MGC13057  | GPAM    |
| PAX9     | ZNF236  | MGC15634  | GPATCH4 |
| PBK      | ZNF248  | MGC16121  | GPBP1   |
| PBXIP1   | ZNF260  | MGC18216  | GPBP1L1 |
| PCCA     | ZNF266  | MGC20983  | GPC1    |
| PCDH18   | ZNF285B | MGC2752   | GPC2    |
| PCDHA11  | ZNF319  | MGC35361  | GPC3    |
| PCDHA4   | ZNF337  | MGC4677   | GPC4    |
| PCDHAC2  | ZNF362  | MGC70857  | GPER    |
| PCDHB19P | ZNF443  | MGEA5     | GPM6B   |
| PCF11    | ZNF512  | MGMT      | GPN3    |
| PCGF1    | ZNF513  | MICALL2   | GPNMB   |
| PCK1     | ZNF514  | MID2      | GPR114  |
| PCM1     | ZNF518B | MIOS      | GPR126  |
| PCMTD2   | ZNF521  | MIPOL1    | GPR143  |
| PCSK1N   | ZNF552  | MIR1208   | GPR160  |
| PDCD5    | ZNF557  | MIR130A   | GPR161  |
| PDE8B    | ZNF577  | MIR205    | GPR177  |
| PDGFD    | ZNF582  | MIR21     | GPR19   |
| PDIA4    | ZNF594  | MIR574    | GPR3    |
| PDK2     | ZNF606  | MIR599    | GPR37   |
| PDLIM5   | ZNF629  | MIR877    | GPR56   |
| PDS5A    | ZNF654  | MIR92A2   | GPR63   |
| PDS5B    | ZNF662  | MKNK2     | GPR64   |
| PDSS2    | ZNF684  | MKRN1     | GPR83   |
| PDZK1IP1 | ZNF689  | MKS1      | GPR89A  |
| PELP1    | ZNF706  | MLH3      | GPR98   |
| PER1     | ZNF763  | MLLT10    | GPRC5B  |

|         |         |         |           |
|---------|---------|---------|-----------|
| PER2    | ZNF787  | MLLT11  | GPX2      |
| PEX13   | ZNF816A | MLN     | GPX8      |
| PEX16   | ZNF823  | MLYCD   | GRAMD1A   |
| PFKFB3  | ZNF841  | MMGT1   | GRB10     |
| PGAP1   | ZNRD1   | MMP23A  | GRB14     |
| PGK1    | ZWINT   | MMS19L  | GRHL2     |
| PGM2L1  |         | MN1     | GRIA3     |
| PGRMC1  |         | MOBKL2B | GRIK5     |
| PHB     |         | MOBKL2C | GRINA     |
| PHF11   |         | MOGAT3  | GRK5      |
| PHLPP2  |         | MORN4   | GRM4      |
| PHYHD1  |         | MOSPD3  | GRM8      |
| PIGM    |         | MPL     | GRPEL2    |
| PIGP    |         | MPST    | GRPR      |
| PIGR    |         | MPV17   | GSDMB     |
| PIGU    |         | MR1     | GSDMD     |
| PIGX    |         | MRAP2   | GSG2      |
| PIK3CD  |         | MREG    | GSN       |
| PIP5K2B |         | MRP63   | GSPT2     |
| PITPNA  |         | MRPL14  | GSR       |
| PITPNB  |         | MRPL22  | GSTA1     |
| PKNOX2  |         | MRPL23  | GSTA2     |
| PLA2G2D |         | MRPL24  | GSTA3     |
| PLDN    |         | MRPL40  | GSTA5     |
| PLEKHA7 |         | MRPL51  | GSTK1     |
| PLEKHG2 |         | MRPL52  | GSTM3     |
| PLEKHN1 |         | MRPL54  | GSTO2     |
| PLEKHO2 |         | MRPS14  | GSTT1     |
| PLIN2   |         | MRPS18C | GSTT2     |
| PLSCR3  |         | MRPS28  | GSTZ1     |
| PMPCA   |         | MRPS31  | GTF2B     |
| PNPLA3  |         | MRPS36  | GTF2E2    |
| PNPLA4  |         | MS4A6A  | GTF2F2    |
| PNPT1   |         | MSRA    | GTF2H2    |
| PNRC1   |         | MSRB2   | GTF2H2B   |
| POL3S   |         | MSTP9   | GTF2H3    |
| POLA2   |         | MSX2P1  | GTF2IP1   |
| POLD3   |         | MT2A    | GTF2IRD2P |
| POLDIP3 |         | MTA1    | GTPBP3    |
| POLL    |         | MTAP    | GTPBP8    |
| POLM    |         | MTCH1   | GUCA1B    |
| POLN    |         | MTCH2   | GUF1      |
| POLQ    |         | MTCP1   | GULP1     |
| POLR1C  |         | MTE     | GXYLT1    |
| POLR2A  |         | MTERF   | GYG1      |
| POLR2B  |         | MTHFS   | GYPC      |
| POLR2G  |         | MTM     | H19       |
| POLR2H  |         | MTMR14  | H2AFY     |
| POMP    |         | MTMR15  | H6PD      |
| POP4    |         | MTSS1   | HABP2     |

|          |            |           |
|----------|------------|-----------|
| POTEF    | MUC6       | HADH      |
| POTEG    | MUM1       | HAGHL     |
| POU2F1   | MUPCDH     | HAND1     |
| PP14571  | MURC       | HAPLN1    |
| PPA2     | MUT        | HAS2      |
| PPCS     | MYB        | HAS3      |
| PPID     | MYCNOS     | HAUS6     |
| PPIH     | MYH14      | HAVCR2    |
| PPM1D    | MYL6B      | HAX1      |
| PPP1CB   | MYOM1      | HBEGF     |
| PPP1R11  | MYOZ1      | HBP1      |
| PPP1R15B | MYST2      | HBQ1      |
| PPP1R1C  | N4BP1      | HBXIP     |
| PPP1R3A  | NAAA       | HCFC2     |
| PPP2R5A  | NAGLU      | HCK       |
| PPP3CA   | NAGS       | HCLS1     |
| PPP6C    | NALCN      | HCP5      |
| PPPDE2   | NAP1L4     | HDAC2     |
| PRAMEF17 | NAPEPLD    | HDAC6     |
| PRAMEF7  | NAPRT1     | HDAC8     |
| PRDM4    | NARG2      | HDAC9     |
| PRDX5    | NAT8       | HDGF      |
| PRKAB1   | NBEA       | HDGFRP3   |
| PRKAG1   | NBPF10     | HDHD3     |
| PRKAR1A  | NCKAP5     | HEATR1    |
| PRKCABP  | NCKIPSD    | HEATR6    |
| PRKCSH   | NCOR2      | HEATR7A   |
| PRLR     | NCRNA00173 | HECW2     |
| PROSC    | NDEL1      | HELLS     |
| PRPF31   | NDRG4      | HEPH      |
| PRPF39   | NDUFA11    | HERC1     |
| PRPF4    | NDUFA9     | HERC5     |
| PRPF8    | NDUFC1     | HERC6     |
| PRR22    | NDUFC2     | HESX1     |
| PRR8     | NEBL       | HEXIM1    |
| PRRG2    | NECAP1     | HEY2      |
| PRRT2    | NEK2       | HFE2      |
| PRSS1    | NEU4       | HHLA2     |
| PRSS2    | NEURL1B    | HIATL1    |
| PRSS7    | NEXN       | HIBCH     |
| PSCA     | NFE2L1     | HIC2      |
| PSCD2    | NFIA       | HIF1A     |
| PSMA2    | NFIB       | HINT3     |
| PSMA7    | NFIC       | HIP1      |
| PSMC2    | NFIX       | HISPPD2A  |
| PSMD2    | NFKB1      | HIST1H1C  |
| PSMD5    | NFKBIE     | HIST1H2BC |
| PSMD9    | NFKBIL2    | HIST1H2BD |
| PSME2    | NFKBIZ     | HIST1H2BE |
| PTER     | NFS1       | HIST1H2BG |

|          |         |            |
|----------|---------|------------|
| PTGER4   | NFXL1   | HIST1H2BJ  |
| PTK6     | NFYB    | HIST1H2BK  |
| PTPLAD2  | NGF     | HIST2H2AA3 |
| PTPRN    | NGFRAP1 | HIST2H2AA4 |
| PTPRT    | NHEDC2  | HIST2H2AC  |
| PUS10    | NHS     | HIST2H2BE  |
| PWWP2A   | NINJ2   | HK2        |
| PXDNL    | NIPA1   | HKDC1      |
| PXMP3    | NIPA2   | HKR1       |
| QRSL1    | NIT2    | HLA-B      |
| R3HCC1   | NKX2-5  | HLA-DOA    |
| RAB10    | NLGN2   | HLA-DPB2   |
| RAB12    | NLGN4Y  | HLA-DRA    |
| RAB14    | NMT2    | HLA-E      |
| RAB1A    | NNAT    | HLA-F      |
| RAB1B    | NOD1    | HMBS       |
| RAB21    | NOL6    | HMG20B     |
| RAB2A    | NOMO2   | HMGA1      |
| RAB2B    | NONO    | HMGB3      |
| RAB35    | NOS3    | HMGCR      |
| RAB40C   | NPC1L1  | HMGCS1     |
| RABGGTA  | NPR2    | HMGCS2     |
| RABL3    | NPR3    | HMGN1      |
| RABL4    | NR0B2   | HMGN2      |
| RAD1     | NR1H2   | HMGN4      |
| RAD18    | NR1H3   | HMGXB4     |
| RAD51L3  | NR1H4   | HN1        |
| RAD52    | NR1I2   | HNF1B      |
| RAD54L   | NR1I3   | HNMT       |
| RAD9A    | NR2C1   | HNRNPA1    |
| RAI2     | NR2E3   | HNRNPA1L2  |
| RALGAPA1 | NR3C1   | HNRNPA3    |
| RALY     | NRAS    | HNRNPU     |
| RANBP2   | NRGN    | HNRPDL     |
| RANBP3L  | NRK     | HNRPLL     |
| RANBP6   | NRM     | HOMER2     |
| RAP1B    | NSF     | HOOK1      |
| RAPGEF4  | NSMAF   | HOXB8      |
| RAPSN    | NSUN6   | HPGD       |
| RARB     | NSUN7   | HPN        |
| RASA3    | NT5DC3  | HPRT1      |
| RASD1    | NT5M    | HPS3       |
| RASL11A  | NTN1    | HPS6       |
| RASSF2   | NTNG1   | HPSE       |
| RASSF4   | NUAK2   | HPX        |
| RAVER2   | NUCB1   | HRASLS     |
| RAXL1    | NUDT16  | HRASLS3    |
| RBAK     | NUMBL   | HRASLS5    |
| RBBP4    | NUP107  | HRK        |
| RBBP9    | NUP155  | HRSP12     |

|               |         |          |
|---------------|---------|----------|
| RBED1         | NUP160  | HS3ST3A1 |
| RBL1          | NUP205  | HS6ST2   |
| RBM17         | NUP43   | HSCB     |
| RBM26         | NUP85   | HSD17B10 |
| RBM41         | NUP93   | HSD17B11 |
| RBMY2FP       | NUTF2   | HSD17B2  |
| RCP9          | NXN     | HSD17B8  |
| REC8          | OAS1    | HSP90AA1 |
| REL           | OBFC1   | HSPA13   |
| RELB          | OBP2B   | HSPA14   |
| RELL1         | OBSL1   | HSPA1A   |
| REV1          | OCEL1   | HSPA1B   |
| REV3L         | ODF2L   | HSPA4    |
| REXO2         | ODF3B   | HSPA4L   |
| RFC1          | OKL38   | HSPA5    |
| RFPL4A        | OLFML3  | HSPA6    |
| RFX4          | OMA1    | HSPA8    |
| RGPD8         | OPA1    | HSPA9    |
| RGR           | OR2W5   | HSPB1    |
| RGS14         | OR3A2   | HSPB8    |
| RGS3          | ORC3L   | HSPBAP1  |
| RHBDD1        | ORM1    | HSPBL2   |
| RHOF          | ORM2    | HSPC111  |
| RIG           | ORMDL1  | HSPC157  |
| RIPK4         | OS9     | HTATIP2  |
| RMND5A        | OSBP2   | HTR2C    |
| RNF114        | OSBPL3  | HTR3A    |
| RNF115        | OSBPL8  | HTRA1    |
| RNF13         | OSGIN1  | HYAL3    |
| RNF148        | OSTbeta | IARS     |
| RNF152        | OTC     | ICA1     |
| RNF165        | OVOL2   | ICAM4    |
| RNF182        | OXER1   | ICT1     |
| RNF187        | OXSM    | ID2      |
| RNF20         | OXT     | IDH2     |
| RNF207        | P2RX7   | IDH3G    |
| RNF219        | P76     | IDI1     |
| RNF25         | PA2G4   | IDO1     |
| RNGTT         | PABPC1  | IDS      |
| RNPC2         | PABPC1L | IER3     |
| ROBLD3        | PABPC3  | IER5     |
| ROBO1         | PACRG   | IFI27    |
| ROM1          | PACS2   | IFI27L2  |
| RORC          | PAH     | IFI30    |
| RP11-529I10.4 | PAIP1   | IFI35    |
| RPA1          | PALB2   | IFI6     |
| RPA2          | PALMD   | IFIH1    |
| RPA3          | PAN2    | IFIT1    |
| RPL23A        | PANK1   | IFIT2    |
| RPL23AP53     | PANX1   | IFITM1   |

|          |         |          |
|----------|---------|----------|
| RPL28    | PAPSS1  | IFITM2   |
| RPL3     | PAR5    | IFITM3   |
| RPL37A   | PARD3   | IFNAR1   |
| RPL5     | PARD6G  | IFNAR2   |
| RPL7A    | PARM1   | IFT88    |
| RPS17    | PARN    | IGDCC3   |
| RPS23    | PARP10  | IGDCC4   |
| RPS3     | PARP11  | IGF2     |
| RPS3A    | PARP12  | IGF2BP3  |
| RPS4Y1   | PARP2   | IGFBP2   |
| RPS5     | PBLD    | IGFBP3   |
| RPS6     | PBX4    | IGFBP4   |
| RPS6KC1  | PC      | IGFBP6   |
| RPS8     | PCAF    | IGFBP7   |
| RREB1    | PCDH10  | IGSF1    |
| RRM1     | PCDH21  | IGSF11   |
| RRP8     | PCDH24  | IGSF3    |
| RSHL3    | PCDHA2  | IGSF5    |
| RSRC2    | PCDHA3  | IGSF9    |
| RTEL1    | PCDHB18 | IKZF4    |
| RTP4     | PCDHB3  | IL10RB   |
| RUFY1    | PCDHGA3 | IL11RA   |
| RUNDC1   | PCDHGB3 | IL13RA1  |
| RUNDC2A  | PCGF5   | IL15     |
| RUNDC3B  | PCLO    | IL17RD   |
| RUSC1    | PCNP    | IL18R1   |
| RWDD2B   | PCSK6   | IL1A     |
| RYBP     | PCYOX1L | IL1R1    |
| SAA1     | PDCD7   | IL1R2    |
| SAA2     | PDCL    | IL20RB   |
| SAMD4A   | PDDC1   | IL27RA   |
| SAMM50   | PDE3B   | IL32     |
| SASS6    | PDE5A   | IL34     |
| SAT1     | PDE9A   | ILF2     |
| SCAF1    | PDGFRL  | ILF3     |
| SCAMP3   | PDHX    | IMPAD1   |
| SCAMP4   | PDLIM1  | INADL    |
| SCAMP5   | PDLIM2  | INDO     |
| SCAP     | PDPR    | INF2     |
| SCAPER   | PDZD8   | ING3     |
| SCARNA14 | PEA15   | INO80B   |
| SCARNA7  | PEBP1   | INSIG1   |
| SCARNA9L | PECI    | INSIG2   |
| SCFD1    | PELO    | INS-IGF2 |
| SCNM1    | PEX1    | IP6K1    |
| SCXA     | PFDN1   | IPO5     |
| SDC3     | PFDN6   | IPO7     |
| SDCCAG8  | PFKFB1  | IQCB1    |
| SDF2L1   | PFN2    | IQCK     |
| SDHAF2   | PGAP3   | IQGAP1   |

|          |          |          |
|----------|----------|----------|
| SDHB     | PGBD2    | IQGAP2   |
| SDHC     | PGCP     | IQSEC1   |
| SDS      | PGLYRP2  | IRAK1BP1 |
| SEC14L2  | PGPEP1   | IRF1     |
| SEC24D   | PGRMC2   | IRF2BP2  |
| SEC61G   | PHACS    | IRF6     |
| SENP1    | PHACTR1  | IRF8     |
| SEPT11   | PHACTR2  | IRF9     |
| SEPT13   | PHF14    | IRX2     |
| SEPT2    | PHF15    | IRX4     |
| SERINC2  | PHF20    | ISCA1L   |
| SERPINB6 | PHF21A   | ISG20L1  |
| SERPINB8 | PHF7     | ISL1     |
| SERTAD1  | PHKA1    | ISL2     |
| SESTD1   | PHLDB1   | ISOC2    |
| SETD6    | PI4K2B   | ISYNA1   |
| SETDB2   | PI4KAP1  | ITCH     |
| SF3A2    | PIAS4    | ITFG2    |
| SF3B3    | PIGB     | ITGA1    |
| SF3B4    | PIGH     | ITGA2    |
| SFRS4    | PIGL     | ITGA6    |
| SFRS6    | PIGQ     | ITGA9    |
| SFT2D3   | PIK3AP1  | ITGAV    |
| SGK2     | PIK3C2A  | ITGB1    |
| SGMS2    | PIK3C2G  | ITGB1BP1 |
| SGOL2    | PIP4K2B  | ITGB1BP3 |
| SH3BP2   | PJA1     | ITIH1    |
| SH3D19   | PKD1L2   | ITLN2    |
| SHCBP1   | PKIB     | ITM2A    |
| SHFM1    | PKLR     | ITM2B    |
| SHOC2    | PKN1     | ITM2C    |
| SHPRH    | PKN3     | ITPKA    |
| SHROOM1  | PKP3     | ITPR2    |
| SIAE     | PLA1A    | ITPR3    |
| SIGLEC15 | PLA2G10  | IVNS1ABP |
| SIRT7    | PLA2G12A | JAG2     |
| SKA2     | PLA2G16  | JAKMIP2  |
| SKP1     | PLA2G1B  | JAM2     |
| SLAIN2   | PLA2G4C  | JARID1A  |
| SLAMF6   | PLA2G7   | JARID2   |
| SLC11A2  | PLAC9    | JCLN     |
| SLC12A6  | PLAGL2   | JMJD1C   |
| SLC12A9  | PLCB1    | JMJD2B   |
| SLC15A4  | PLCB4    | JOSD1    |
| SLC16A12 | PLCG2    | JOSD2    |
| SLC16A13 | PLCH1    | JPH1     |
| SLC16A2  | PLCH2    | JPH2     |
| SLC19A1  | PLCXD1   | JPH3     |
| SLC19A2  | PLEK     | JUB      |
| SLC1A2   | PLEK2    | JUN      |



|          |          |          |
|----------|----------|----------|
| SLC20A2  | PLEKHA5  | JUP      |
| SLC22A1  | PLEKHG1  | KAL1     |
| SLC22A10 | PLG      | KANK4    |
| SLC22A15 | PLGLB1   | KAT2B    |
| SLC22A6  | PLGLB2   | KATNA1   |
| SLC25A30 | PLK2     | KATNAL1  |
| SLC25A33 | PLP2     | KATNAL2  |
| SLC25A35 | PLSCR4   | KCNA5    |
| SLC25A44 | PLXDC2   | KCNAB1   |
| SLC28A1  | PLXNA1   | KCND1    |
| SLC29A3  | PMM1     | KCND2    |
| SLC30A6  | PMM2     | KCNG1    |
| SLC30A9  | PMPCB    | KCNG3    |
| SLC33A1  | PMS1     | KCNIP3   |
| SLC35D1  | PNMA6A   | KCNJ6    |
| SLC35E3  | PNMAL1   | KCNJ8    |
| SLC35F3  | POLB     | KCNK12   |
| SLC37A1  | POLD4    | KCNK5    |
| SLC38A11 | POLDIP2  | KCNK7    |
| SLC39A7  | POLE     | KCNMA1   |
| SLC39A9  | POLG2    | KCNMB4   |
| SLC41A3  | POLR2E   | KCNN2    |
| SLC45A2  | POLR2J4  | KCNQ2    |
| SLC4A5   | POLR2L   | KCNS3    |
| SLC5A3   | POLR3A   | KCTD12   |
| SLC5A8   | POLR3H   | KCTD14   |
| SLC6A13  | PON1     | KCTD15   |
| SLC9A2   | POR      | KCTD21   |
| SLC9A3R2 | PORCN    | KCTD8    |
| SLED1    | POU3F1   | KDELC1   |
| SLPI     | POU6F1   | KDELR1   |
| SLU7     | PPARGC1A | KDM3B    |
| SMAD4    | PPBP     | KDM5B    |
| SMARCAL1 | PPIB     | KHDC1L   |
| SMC3     | PPM1K    | KHDRBS3  |
| SMCR8    | PPM1M    | KIAA0020 |
| SMYD2    | PPP1R12A | KIAA0090 |
| SMYD3    | PPP1R15A | KIAA0114 |
| SNCAIP   | PPP1R16A | KIAA0194 |
| SNHG6    | PPP2CA   | KIAA0232 |
| SNIP1    | PPP2R2A  | KIAA0247 |
| SNORA11C | PPP2R5E  | KIAA0251 |
| SNORA11E | PPWD1    | KIAA0367 |
| SNORA26  | PRAP1    | KIAA0368 |
| SNORA28  | PRC1     | KIAA0494 |
| SNORA5C  | PRCC     | KIAA0514 |
| SNORA68  | PRDM5    | KIAA0528 |
| SNORA72  | PREB     | KIAA0562 |
| SNORA75  | PREPL    | KIAA0664 |
| SNORA7B  | PREX1    | KIAA0672 |

|          |           |           |
|----------|-----------|-----------|
| SNORD17  | PRG2      | KIAA0773  |
| SNORD3A  | PRG4      | KIAA0895  |
| SNORD55  | PRKAB2    | KIAA0913  |
| SNRNP40  | PRKACB    | KIAA1009  |
| SNTA1    | PRKCDBP   | KIAA1033  |
| SNX26    | PRKCI     | KIAA1161  |
| SNX8     | PRKX      | KIAA1217  |
| SORCS2   | PRKY      | KIAA1244  |
| SPA17    | PRO1853   | KIAA1267  |
| SPAG4    | PROC      | KIAA1274  |
| SPAG4L   | PROCA1    | KIAA1310  |
| SPAG5    | PRODH2    | KIAA1324L |
| SPATA13  | PROM1     | KIAA1370  |
| SPATA2   | PROM2     | KIAA1430  |
| SPATA2L  | ProSAPiP1 | KIAA1467  |
| SPATA5L1 | PROX1     | KIAA1543  |
| SPCS2    | PROZ      | KIAA1545  |
| SPPL2A   | PRPF38A   | KIAA1598  |
| SPRN     | PRPF40B   | KIAA1644  |
| SPRR1A   | PRPF4B    | KIAA1683  |
| SPSB3    | PRPH      | KIAA1712  |
| SPTBN5   | PRPH2     | KIAA1715  |
| SPTLC2   | PRR4      | KIAA1804  |
| SQSTM1   | PRSS16    | KIAA1875  |
| SRA1     | PRSS3     | KIAA1967  |
| SRD5A2   | PSD3      | KIAA1984  |
| SRGAP1   | PSG9      | KIF13A    |
| SRP19    | PSMB10    | KIF13B    |
| SRP54    | PSMB5     | KIF15     |
| SRPRB    | PSMB9     | KIF17     |
| SSBP2    | PSPC1     | KIF1A     |
| SSBP3    | PSRC1     | KIF1B     |
| SSFA2    | PTCH1     | KIF26A    |
| SSTR1    | PTCHD1    | KIF2A     |
| SSX2IP   | PTDSS2    | KIF5C     |
| SSX4     | PTEN      | KIFC1     |
| ST3GAL4  | PTHLH     | KIRREL2   |
| ST7OT1   | PTP4A1    | KITLG     |
| ST8SIA1  | PTPDC1    | KLB       |
| ST8SIA2  | PTPN14    | KLC3      |
| STAG2    | PTPN7     | KLF10     |
| STAT4    | PTPRD     | KLF12     |
| STAU2    | PTPRH     | KLF13     |
| STK36    | PUS7L     | KLF2      |
| STK4     | PVR       | KLF5      |
| STT3A    | PWP2      | KLF8      |
| STT3B    | PXMP4     | KLHDC5    |
| STUB1    | PXN       | KLHDC9    |
| STX10    | PYCR1     | KLHL12    |
| STX1A    | PYGL      | KLHL21    |

|         |           |          |
|---------|-----------|----------|
| STXBP1  | QRFPR     | KLHL22   |
| SULT1B1 | QSOX1     | KLHL23   |
| SULT4A1 | QTRT1     | KLHL7    |
| SULT6B1 | R3HDM1    | KLHL8    |
| SUMO4   | RAB11FIP2 | KLK5     |
| SUPT16H | RAB15     | KLK6     |
| SUPT4H1 | RAB24     | KLKB1    |
| SUPV3L1 | RAB30     | KLRA1    |
| SURF1   | RAB34     | KLRG1    |
| SUSD4   | RAB37     | KLRG2    |
| SYCE1L  | RAB3GAP2  | KPNA2    |
| SYN1    | RAB3IL1   | KREMEN2  |
| SYNJ2BP | RAB7B     | KRT18    |
| SYT3    | RACGAP1   | KRT18P13 |
| TADA2A  | RAD17     | KRT18P17 |
| TAF10   | RADIL     | KRT18P28 |
| TAF13   | RAF1      | KRT19    |
| TAF5    | RAGE      | KRT8P9   |
| TAF5L   | RAI14     | KRTAP6-3 |
| TAF8    | RALA      | KRTDAP   |
| TAGLN2  | RALGAPB   | KTELC1   |
| TALDO1  | RALGPS1   | KTN1     |
| TAOK3   | RALYL     | KYNU     |
| TAS2R43 | RAMP1     | L1TD1    |
| TBC1D21 | RAPGEF3   | L2HGDH   |
| TBC1D5  | RAPGEF5   | L3MBTL   |
| TBC1D8B | RAPH1     | LAMA1    |
| TBCD    | RARRES3   | LAMA2    |
| TBKBP1  | RASAL2    | LAMA4    |
| TBL3    | RASAL3    | LAMA5    |
| TBX10   | RASGRP3   | LAMB2    |
| TBX15   | RASSF5    | LAMC1    |
| TCEAL1  | RBM15     | LAMC2    |
| TCF3    | RBM20     | LAMP2    |
| TCP11L1 | RBM24     | LAMP3    |
| TEC     | RBM25     | LAPTM4B  |
| TEF     | RBMS2     | LARGE    |
| TFAP2E  | RBMS2P    | LARP1    |
| TGM3    | RBMX      | LARP1B   |
| THOC1   | RBMX2     | LARP6    |
| THOC5   | RBP5      | LARS     |
| TIAM1   | RCAN1     | LAS1L    |
| TICAM1  | RCAN3     | LBH      |
| TIFA    | RCBTB1    | LCK      |
| TIGD1   | RCCD1     | LCMT1    |
| TIGD6   | RCN1      | LCN15    |
| TIGIT   | RDH5      | LCN2     |
| TIMM17A | RECQL     | LCP1     |
| TIMM22  | RECQL4    | LCTL     |
| TJAP1   | REEP4     | LDB2     |

|           |          |             |
|-----------|----------|-------------|
| TK1       | RELA     | LDHB        |
| TLK1      | RER1     | LDHD        |
| TLR1      | RFFL     | DLDR        |
| TLR10     | RFTN2    | LEAP2       |
| TLR3      | RFWD2    | LECT1       |
| TLR6      | RFX1     | LEFTY1      |
| TMBIM4    | RFX7     | LEFTY2      |
| TMCO1     | RGL4     | LEPREL1     |
| TMED2     | RGN      | LEPREL2     |
| TMEM1     | RGS1     | LEPROT      |
| TMEM105   | RGS11    | LETMD1      |
| TMEM106A  | RGS16    | LGALS8      |
| TMEM11    | RGS20    | LGI2        |
| TMEM110   | RHBDD2   | LHFPL4      |
| TMEM123   | RHBDF1   | LHX6        |
| TMEM129   | RHOG     | LIAS        |
| TMEM134   | RIC3     | LIFR        |
| TMEM138   | RILP     | LIG3        |
| TMEM161B  | RILPL1   | LIME1       |
| TMEM169   | RILPL2   | LIMK2       |
| TMEM184A  | RIPK5    | LIMS2       |
| TMEM187   | RIT1     | LIN28       |
| TMEM191A  | RLTPR    | LIN28B      |
| TMEM191B  | RN5S9    | LIN37       |
| TMEM199   | RND1     | LINGO2      |
| TMEM207   | RNF10    | LIPG        |
| TMEM39B   | RNF11    | LIPT1       |
| TMEM41A   | RNF123   | LMBRD1      |
| TMEM45B   | RNF126P1 | LMCD1       |
| TMEM55B   | RNF160   | LMF2        |
| TMEM66    | RNF19A   | LMNA        |
| TMEM83    | RNF19B   | LMO4        |
| TMEM9     | RNF213   | LMTK3       |
| TMEM91    | RNF215   | LOC10012791 |
| TMOD2     | RNF32    | LOC10012792 |
| TMX3      | RNF5     | LOC10012798 |
| TNFAIP2   | ROD1     | LOC10012798 |
| TNFRSF10D | ROR1     | LOC10012806 |
| TNFRSF25  | RORA     | LOC10012808 |
| TNFRSF9   | RP2      | LOC10012816 |
| TNFSF14   | RPH3AL   | LOC10012825 |
| TNIP2     | RPIA     | LOC10012826 |
| TOB1      | RPL14    | LOC10012826 |
| TOMM22    | RPL15    | LOC10012827 |
| TOP2B     | RPL22L1  | LOC10012829 |
| TOP3A     | RPL23AP7 | LOC10012832 |
| TOPBP1    | RPL37    | LOC10012835 |
| TOR1AIP1  | RPL4     | LOC10012841 |
| TP53AIP1  | RPN2     | LOC10012868 |
| TP53RK    | RPRD1B   | LOC10012873 |

|              |          |             |
|--------------|----------|-------------|
| TP53TG3      | RPS6KA3  | LOC10012876 |
| TPSG1        | RSAD1    | LOC10012877 |
| TPST1        | RSBN1L   | LOC10012883 |
| TPTE2        | RSC1A1   | LOC10012888 |
| TPX2         | RSF1     | LOC10012889 |
| TRA1P2       | RSPH10B  | LOC10012903 |
| TRAF3        | RSPH9    | LOC10012906 |
| TRAP1        | RTKN     | LOC10012911 |
| TRAPPC4      | RTKN2    | LOC10012913 |
| TREH         | RTN4     | LOC10012914 |
| TRIM16L      | RTP2     | LOC10012919 |
| TRIM2        | RTP3     | LOC10012923 |
| TRIM25       | RTTN     | LOC10012926 |
| TRIM28       | RWDD2A   | LOC10012929 |
| TRIM3        | RWDD3    | LOC10012965 |
| TRIM31       | RXRG     | LOC10012965 |
| TRIM6-TRIM34 | RYR3     | LOC10012967 |
| TRIM73       | S1PR1    | LOC10012968 |
| TRIML1       | S1PR4    | LOC10012982 |
| TRIO         | SAA4     | LOC10012990 |
| TRIP12       | SAMD11   | LOC10013000 |
| TRIP4        | SAMD5    | LOC10013007 |
| TRK1         | SAMD9    | LOC10013009 |
| TRMT5        | SAP18    | LOC10013013 |
| TRMT6        | SARDH    | LOC10013017 |
| TRMT61A      | SARM1    | LOC10013022 |
| TRPC4AP      | SAT2     | LOC10013023 |
| TRPM4        | SAV1     | LOC10013029 |
| TRPM8        | SBF2     | LOC10013056 |
| TRQ1         | SC65     | LOC10013062 |
| TRR1         | SCAND1   | LOC10013076 |
| TRUB2        | SCAND2   | LOC10013076 |
| TSEN2        | SCARF2   | LOC10013077 |
| TSEN54       | SCARNA17 | LOC10013082 |
| TSG101       | SCCPDH   | LOC10013088 |
| TSLP         | SCGN     | LOC10013090 |
| TSPAN1       | SCHIP1   | LOC10013091 |
| TSPAN6       | SCLT1    | LOC10013091 |
| TSPAN9       | SCLY     | LOC10013113 |
| TSPYL3       | SCN4B    | LOC10013118 |
| TSPYL6       | SCN9A    | LOC10013132 |
| TSSK2        | SCNN1D   | LOC10013157 |
| TSTD1        | SCO2     | LOC10013160 |
| TTC21A       | SCRN1    | LOC10013165 |
| TTC36        | SDAD1    | LOC10013178 |
| TTC5         | SDC1     | LOC10013180 |
| TTF2         | SDC2     | LOC10013185 |
| TTLL4        | SDK2     | LOC10013186 |
| TTRAP        | SDR42E1  | LOC10013194 |
| TTYH2        | SDSL     | LOC10013196 |

|           |           |             |
|-----------|-----------|-------------|
| TUBA1B    | SEC11A    | LOC10013203 |
| TUBA3E    | SEC14L4   | LOC10013209 |
| TUBA4     | SEC22A    | LOC10013213 |
| TUBD1     | SEC23B    | LOC10013232 |
| TUFM      | SEC61A2   | LOC10013239 |
| TXNDC16   | SEC62     | LOC10013249 |
| TXNDC17   | SEL1L     | LOC10013251 |
| TXNL4B    | SELENBP1  | LOC10013252 |
| UBAP2L    | SELM      | LOC10013253 |
| UBC       | SEMA3E    | LOC10013256 |
| UBE2A     | SEMA4D    | LOC10013267 |
| UBE2D4    | SEMA4G    | LOC10013272 |
| UBE2V1    | SEMA5B    | LOC10013279 |
| UBQLN1    | SEMA6A    | LOC10013280 |
| UBQLN4    | SENP6     | LOC10013290 |
| UBR1      | SENP7     | LOC10013291 |
| UBR4      | SEPT6     | LOC10013293 |
| UCKL1     | SEPT9     | LOC10013299 |
| UFSP1     | SEPX1     | LOC10013300 |
| UGCGL1    | SERP2     | LOC10013301 |
| UGT1A1    | SERPINA10 | LOC10013321 |
| UGT1A10   | SERPINA11 | LOC10013322 |
| UGT1A3    | SERPINA4  | LOC10013327 |
| UGT1A4    | SERPINA6  | LOC10013332 |
| UGT1A6    | SERPINA7  | LOC10013337 |
| UGT1A7    | SERPINB5  | LOC10013343 |
| UGT1A9    | SERPIND1  | LOC10013348 |
| UGT3A1    | SERPINE2  | LOC10013359 |
| UHRF1BP1  | SERPINF1  | LOC10013374 |
| UHRF1BP1L | SESN1     | LOC10013376 |
| UNC5CL    | SETD1B    | LOC10013381 |
| UPLP      | SEZ6L2    | LOC10013383 |
| UQCRHL    | SF3B5     | LOC10013401 |
| UROC1     | SF4       | LOC10013407 |
| USP12     | SFMBT1    | LOC10013410 |
| USP2      | SFRS13B   | LOC10013413 |
| USP30     | SFRS14    | LOC10013414 |
| USP34     | SFRS18    | LOC10013418 |
| USP37     | SFRS9     | LOC10013419 |
| USP41     | SFT2D2    | LOC10013429 |
| USP48     | SFXN2     | LOC10013430 |
| USP6NL    | SFXN5     | LOC10013430 |
| USP7      | SGCB      | LOC10013430 |
| USPL1     | SGCE      | LOC10013436 |
| UTP23     | SGMS1     | LOC10013439 |
| VARS      | SGTB      | LOC10013452 |
| VCP       | SH2D3A    | LOC10013453 |
| VEGFA     | SHISA5    | LOC10013481 |
| VEGFC     | SHMT1     | LOC10019098 |
| VPRBP     | SIAH1     | LOC123688   |

|          |            |           |
|----------|------------|-----------|
| VPS26A   | SIKE       | LOC124512 |
| VPS37B   | SIPA1L3    | LOC126767 |
| VPS37D   | SIRPA      | LOC133993 |
| VPS45    | SIX4       | LOC144481 |
| VPS72    | SKAP1      | LOC146439 |
| VTRNA1-1 | SKIL       | LOC147645 |
| VWA3A    | SKIV2L2    | LOC147646 |
| WASF1    | SLAMF9     | LOC148709 |
| WBP4     | SLC14A1    | LOC149134 |
| WBSCR16  | SLC15A1    | LOC149448 |
| WBSCR19  | SLC16A1    | LOC153561 |
| WDR40B   | SLC16A10   | LOC157627 |
| WDR48    | SLC16A9    | LOC158160 |
| WDR62    | SLC17A1    | LOC158345 |
| WDR65    | SLC17A2    | LOC168474 |
| WDR7     | SLC17A3    | LOC196752 |
| WDR76    | SLC17A4    | LOC201725 |
| WDR77    | SLC17A9    | LOC202134 |
| WHSC1L1  | SLC22A18AS | LOC202781 |
| WIBG     | SLC22A25   | LOC220115 |
| WNT8A    | SLC22A3    | LOC221136 |
| WRN      | SLC22A9    | LOC23117  |
| WSB2     | SLC24A1    | LOC283116 |
| WVOX     | SLC24A6    | LOC283174 |
| XDH      | SLC25A1    | LOC283340 |
| XIAP     | SLC25A10   | LOC283663 |
| XIST     | SLC25A12   | LOC284428 |
| XKRX     | SLC25A14   | LOC284988 |
| XPO6     | SLC25A18   | LOC285053 |
| YDJC     | SLC25A23   | LOC285074 |
| YES1     | SLC25A28   | LOC285141 |
| YIF1A    | SLC25A34   | LOC285216 |
| YIPF6    | SLC25A36   | LOC285359 |
| YTHDC2   | SLC25A42   | LOC285733 |
| ZBED3    | SLC25A43   | LOC286208 |
| ZBTB17   | SLC25A45   | LOC286444 |
| ZBTB26   | SLC27A2    | LOC338758 |
| ZBTB32   | SLC27A3    | LOC339290 |
| ZBTB39   | SLC29A1    | LOC339535 |
| ZBTB44   | SLC29A2    | LOC339799 |
| ZBTB46   | SLC29A4    | LOC340274 |
| ZBTB7A   | SLC2A2     | LOC340970 |
| ZBTB7B   | SLC2A3     | LOC341230 |
| ZC3H10   | SLC2A4RG   | LOC341315 |
| ZC3H5    | SLC2A9     | LOC342934 |
| ZCCHC17  | SLC30A10   | LOC344595 |
| ZCWPW1   | SLC30A5    | LOC345041 |
| ZDHHC1   | SLC35B1    | LOC346887 |
| ZDHHC16  | SLC35B4    | LOC374395 |
| ZDHHC17  | SLC37A4    | LOC374491 |

|         |          |           |
|---------|----------|-----------|
| ZDHHC9  | SLC38A2  | LOC387683 |
| ZFP1    | SLC38A3  | LOC387703 |
| ZFP64   | SLC38A4  | LOC387791 |
| ZHX2    | SLC38A9  | LOC387820 |
| ZKSCAN3 | SLC39A10 | LOC387825 |
| ZKSCAN4 | SLC39A3  | LOC387867 |
| ZKSCAN5 | SLC39A8  | LOC387934 |
| ZMAT5   | SLC3A1   | LOC388122 |
| ZMYM6   | SLC41A2  | LOC388458 |
| ZNF133  | SLC44A2  | LOC388494 |
| ZNF143  | SLC46A1  | LOC388524 |
| ZNF174  | SLC48A1  | LOC388588 |
| ZNF182  | SLC4A1AP | LOC388654 |
| ZNF184  | SLC4A4   | LOC388707 |
| ZNF187  | SLC6A1   | LOC388755 |
| ZNF223  | SLC6A12  | LOC389049 |
| ZNF225  | SLC6A6   | LOC389137 |
| ZNF227  | SLC6A8   | LOC389141 |
| ZNF233  | SLC7A6OS | LOC389168 |
| ZNF234  | SLCO1B3  | LOC389203 |
| ZNF235  | SLCO4C1  | LOC389404 |
| ZNF24   | SLFN5    | LOC389517 |
| ZNF25   | SLITRK4  | LOC389672 |
| ZNF251  | SLMAP    | LOC389873 |
| ZNF302  | SMARCA4  | LOC389895 |
| ZNF320  | SMARCA5  | LOC390251 |
| ZNF364  | SMARCD1  | LOC390466 |
| ZNF385B | SMARCB1  | LOC390557 |
| ZNF404  | SMARCD1  | LOC390578 |
| ZNF418  | SMNDC1   | LOC390834 |
| ZNF439  | SMOC1    | LOC391045 |
| ZNF45   | SMS      | LOC391670 |
| ZNF468  | SNAPC1   | LOC391769 |
| ZNF480  | SNAPC4   | LOC392264 |
| ZNF486  | SNHG10   | LOC392301 |
| ZNF490  | SNORA59A | LOC392437 |
| ZNF498  | SNORA76  | LOC392871 |
| ZNF509  | SNORA8   | LOC399804 |
| ZNF543  | SNORD38A | LOC399942 |
| ZNF549  | SNORD73A | LOC399965 |
| ZNF562  | SNTB2    | LOC399988 |
| ZNF566  | SNX16    | LOC400214 |
| ZNF576  | SNX17    | LOC400406 |
| ZNF593  | SNX22    | LOC400464 |
| ZNF600  | SNX24    | LOC400506 |
| ZNF615  | SNX27    | LOC400652 |
| ZNF618  | SOCS1    | LOC400948 |
| ZNF622  | SOCS5    | LOC401115 |
| ZNF628  | SORBS2   | LOC401127 |
| ZNF655  | SOX13    | LOC401152 |



|           |         |           |
|-----------|---------|-----------|
| ZNF658B   | SOX15   | LOC401252 |
| ZNF664    | SOX2OT  | LOC401317 |
| ZNF668    | SOX4    | LOC401321 |
| ZNF691    | SP100   | LOC401537 |
| ZNF707    | SP110   | LOC401622 |
| ZNF711    | SP140   | LOC401623 |
| ZNF738    | SP140L  | LOC401717 |
| ZNF772    | SP5     | LOC402112 |
| ZNF774    | SPAG1   | LOC402175 |
| ZNF777    | SPARCL1 | LOC402221 |
| ZNF778    | SPAST   | LOC402251 |
| ZNF784    | SPATA17 | LOC402562 |
| ZNF786    | SPATS2  | LOC439992 |
| ZNF792    | SPHK2   | LOC440040 |
| ZNF828    | SPIC    | LOC440043 |
| ZNF860    | SPIN1   | LOC440061 |
| ZNF98     | SPINT2  | LOC440093 |
| ZNHIT2    | SPIRE1  | LOC440132 |
| ZP3       | SPN     | LOC440145 |
| ZSCAN12L1 | SPNS1   | LOC440160 |
| ZSWIM3    | SPON2   | LOC440341 |
| ZSWIM6    | SPP2    | LOC440345 |
| ZUFSP     | SPRED2  | LOC440349 |
|           | SPRY2   | LOC440359 |
|           | SPTBN1  | LOC440498 |
|           | SQRDL   | LOC440585 |
|           | SRBD1   | LOC440731 |
|           | SRD5A1  | LOC440895 |
|           | SRGN    | LOC440905 |
|           | SRP72   | LOC440910 |
|           | SRPK2   | LOC440993 |
|           | SS18    | LOC441013 |
|           | SSPN    | LOC441032 |
|           | SSR2    | LOC441061 |
|           | SSSCA1  | LOC441089 |
|           | SSX3    | LOC441408 |
|           | ST3GAL3 | LOC441442 |
|           | ST7     | LOC441453 |
|           | STAC    | LOC441484 |
|           | STAG3L4 | LOC441506 |
|           | STARD5  | LOC441907 |
|           | STAT6   | LOC442180 |
|           | STAU1   | LOC442181 |
|           | STBD1   | LOC442597 |
|           | STC2    | LOC442609 |
|           | STIP1   | LOC493869 |
|           | STK16   | LOC550112 |
|           | STK38L  | LOC550643 |
|           | STOML1  | LOC554203 |
|           | STRADA  | LOC613037 |

|          |           |
|----------|-----------|
| STRADB   | LOC641768 |
| STRN     | LOC641814 |
| STX11    | LOC641849 |
| STX16    | LOC642033 |
| STX6     | LOC642148 |
| STYK1    | LOC642219 |
| STYXL1   | LOC642236 |
| SUCLG1   | LOC642252 |
| SUDS3    | LOC642280 |
| SULF1    | LOC642299 |
| SULT1E1  | LOC642362 |
| SUSD3    | LOC642367 |
| SUZ12    | LOC642464 |
| SUZ12P   | LOC642559 |
| SWAP70   | LOC642570 |
| SYAP1    | LOC642661 |
| SYCE2    | LOC642817 |
| SYK      | LOC642869 |
| SYNE2    | LOC642897 |
| SYTL4    | LOC642909 |
| TAAR1    | LOC642946 |
| TACC3    | LOC642956 |
| TACSTD1  | LOC643167 |
| TAF12    | LOC643272 |
| TAF1B    | LOC643287 |
| TAF6     | LOC643293 |
| TAF6L    | LOC643296 |
| TANK     | LOC643319 |
| TAPBPL   | LOC643357 |
| TARBP1   | LOC643431 |
| TAT      | LOC643445 |
| TATDN2   | LOC643700 |
| TAZ      | LOC643719 |
| TBC1D15  | LOC643778 |
| TBC1D22B | LOC643790 |
| TBCB     | LOC643873 |
| TCAM1    | LOC643896 |
| TCEB3    | LOC643918 |
| TCERG1L  | LOC643960 |
| TCF1     | LOC643995 |
| TCF12    | LOC644037 |
| TCF19    | LOC644075 |
| TCF7     | LOC644124 |
| TCL1B    | LOC644131 |
| TCP11L2  | LOC644172 |
| TCTA     | LOC644214 |
| TCTN1    | LOC644237 |
| TDRD3    | LOC644254 |
| TEK      | LOC644715 |
| TENC1    | LOC644743 |

|          |           |
|----------|-----------|
| TEPP     | LOC644745 |
| TEX11    | LOC644762 |
| TEX261   | LOC644852 |
| TEX9     | LOC644879 |
| TFAP2C   | LOC644928 |
| TFCP2L1  | LOC645018 |
| TFR2     | LOC645058 |
| TGIF2    | LOC645166 |
| TH1L     | LOC645173 |
| THADA    | LOC645236 |
| THAP10   | LOC645262 |
| THAP9    | LOC645317 |
| THOC6    | LOC645321 |
| THOP1    | LOC645323 |
| THPO     | LOC645381 |
| THSD4    | LOC645385 |
| TIGD5    | LOC645431 |
| TIGD7    | LOC645436 |
| TIMM8B   | LOC645466 |
| TIRAP    | LOC645489 |
| TJP1     | LOC645638 |
| TK2      | LOC645669 |
| TLE1     | LOC645682 |
| TLK2     | LOC645688 |
| TLR8     | LOC645691 |
| TM2D3    | LOC645693 |
| TM4SF18  | LOC645715 |
| TM4SF4   | LOC645781 |
| TM7SF2   | LOC645968 |
| TM7SF3   | LOC646043 |
| TMBIM1   | LOC646294 |
| TMC7     | LOC646316 |
| TMED3    | LOC646572 |
| TMED5    | LOC646723 |
| TMED6    | LOC646750 |
| TMEM101  | LOC646753 |
| TMEM111  | LOC646754 |
| TMEM136  | LOC646769 |
| TMEM139  | LOC646791 |
| TMEM147  | LOC646808 |
| TMEM149  | LOC646817 |
| TMEM14A  | LOC646849 |
| TMEM154  | LOC646956 |
| TMEM168  | LOC647150 |
| TMEM171  | LOC647169 |
| TMEM176B | LOC647436 |
| TMEM178  | LOC647450 |
| TMEM184C | LOC647456 |
| TMEM19   | LOC647784 |
| TMEM194  | LOC647856 |

|           |           |
|-----------|-----------|
| TMEM194A  | LOC647859 |
| TMEM20    | LOC648057 |
| TMEM205   | LOC648210 |
| TMEM216   | LOC648249 |
| TMEM220   | LOC648399 |
| TMEM233   | LOC648605 |
| TMEM37    | LOC648695 |
| TMEM45A   | LOC648927 |
| TMEM49    | LOC649049 |
| TMEM53    | LOC649150 |
| TMEM57    | LOC649181 |
| TMEM67    | LOC649553 |
| TMEM68    | LOC649555 |
| TMEM77    | LOC649679 |
| TMEM82    | LOC649970 |
| TMEM87A   | LOC650215 |
| TMEM90B   | LOC650298 |
| TMEM92    | LOC650369 |
| TMEM9B    | LOC650646 |
| TMOD1     | LOC650737 |
| TMX4      | LOC651149 |
| TNC       | LOC651745 |
| TNFAIP8   | LOC651816 |
| TNFAIP8L1 | LOC652097 |
| TNFRSF10B | LOC652330 |
| TNFRSF12A | LOC652377 |
| TNFRSF14  | LOC652470 |
| TNNC1     | LOC652489 |
| TNPO1     | LOC652492 |
| TNPO3     | LOC652570 |
| TNRC6A    | LOC652577 |
| TOX       | LOC652615 |
| TOX4      | LOC652675 |
| TP53AP1   | LOC652904 |
| TP53TG1   | LOC652968 |
| TPBG      | LOC653057 |
| TPCN2     | LOC653111 |
| TPM4      | LOC653189 |
| TPMT      | LOC653192 |
| TRAF1     | LOC653226 |
| TRAF3IP2  | LOC653257 |
| TRAF6     | LOC653337 |
| TRAF7     | LOC653344 |
| TREML1    | LOC653355 |
| TRIB1     | LOC653377 |
| TRIB2     | LOC653381 |
| TRIM10    | LOC653438 |
| TRIM15    | LOC653479 |
| TRIM35    | LOC653506 |
| TRIM47    | LOC653557 |

|         |           |
|---------|-----------|
| TRIM71  | LOC653656 |
| TRIM9   | LOC653778 |
| TRIP10  | LOC653820 |
| TROAP   | LOC653888 |
| T-SP1   | LOC653907 |
| TSPAN13 | LOC653994 |
| TSPAN31 | LOC654053 |
| TSPAN5  | LOC654101 |
| TSPYL5  | LOC654103 |
| TSSK6   | LOC654244 |
| TSTA3   | LOC654342 |
| TTC1    | LOC678655 |
| TTC25   | LOC727758 |
| TTC32   | LOC727803 |
| TTC37   | LOC727828 |
| TTC4    | LOC727865 |
| TTC9C   | LOC727866 |
| TTF1    | LOC727935 |
| TLL1    | LOC727962 |
| TLL5    | LOC727980 |
| TTY15   | LOC727984 |
| TUBA1C  | LOC728026 |
| TUBA3D  | LOC728031 |
| TUBGCP3 | LOC728059 |
| TXN     | LOC728069 |
| TXN2    | LOC728115 |
| TXNDC3  | LOC728126 |
| TXNL4A  | LOC728153 |
| TYK2    | LOC728170 |
| TYMP    | LOC728275 |
| TYMS    | LOC728312 |
| TYROBP  | LOC728473 |
| U2AF1L2 | LOC728492 |
| UAP1    | LOC728554 |
| UAP1L1  | LOC728590 |
| UBA6    | LOC728591 |
| UBAC1   | LOC728620 |
| UBAP1   | LOC728635 |
| UBB     | LOC728640 |
| UBD     | LOC728643 |
| UBE2CBP | LOC728650 |
| UBE2J2  | LOC728666 |
| UBE2O   | LOC728689 |
| UBE2Z   | LOC728698 |
| UBL4A   | LOC728715 |
| UBN1    | LOC728732 |
| UBR5    | LOC728739 |
| UBXN2A  | LOC728811 |
| UBXN6   | LOC728823 |
| UCK1    | LOC728825 |

|         |           |
|---------|-----------|
| UCP2    | LOC728873 |
| UFD1L   | LOC728887 |
| UGT2A3  | LOC728889 |
| UGT2B10 | LOC728927 |
| UGT2B15 | LOC728931 |
| UGT2B17 | LOC728937 |
| UGT2B4  | LOC728945 |
| UNC13B  | LOC728961 |
| UNC50   | LOC729057 |
| UNC5B   | LOC729082 |
| UPB1    | LOC729086 |
| UPK1A   | LOC729130 |
| UQCC    | LOC729317 |
| UQCRB   | LOC729342 |
| UROD    | LOC729378 |
| USE1    | LOC729389 |
| USH2A   | LOC729406 |
| USP10   | LOC729423 |
| USP11   | LOC729458 |
| USP13   | LOC729500 |
| USP18   | LOC729570 |
| USP25   | LOC729608 |
| USP39   | LOC729660 |
| USP46   | LOC729669 |
| USP54   | LOC729686 |
| USP9Y   | LOC729731 |
| UTP3    | LOC729779 |
| UTP6    | LOC729960 |
| VAMP5   | LOC729964 |
| VAR52   | LOC729978 |
| VCAN    | LOC730020 |
| VCX     | LOC730029 |
| VCX3A   | LOC730051 |
| VCX-C   | LOC730159 |
| VDAC2   | LOC730173 |
| VIP     | LOC730235 |
| VMD2L3  | LOC730268 |
| VNN1    | LOC730278 |
| VNN3    | LOC730413 |
| VPREB3  | LOC730417 |
| VPS33A  | LOC730455 |
| VPS8    | LOC730704 |
| VWCE    | LOC730746 |
| WAS     | LOC730820 |
| WASF3   | LOC731314 |
| WBP11   | LOC731751 |
| WDFY1   | LOC731835 |
| WDFY2   | LOC731895 |
| WDR23   | LOC731932 |
| WDR42A  | LOC731954 |

|         |           |
|---------|-----------|
| WDR45L  | LOC732445 |
| WDR47   | LOC90624  |
| WDR54   | LOC91461  |
| WDR55   | LOC91561  |
| WDR68   | LOC92249  |
| WDR72   | LONP2     |
| WDR75   | LONRF1    |
| WDR90   | LOX       |
| WDR92   | LOXL3     |
| WNK4    | LOXL4     |
| WNT5B   | LPAR2     |
| WTIP    | LPAR3     |
| WWC1    | LPAR4     |
| XPA     | LPAR5     |
| XPO4    | LPHN1     |
| XYLT2   | LPHN2     |
| YIPF3   | LPIN2     |
| YLPM1   | LPPR3     |
| YY1     | LQK1      |
| ZBBX    | LRAT      |
| ZBTB25  | LRCH2     |
| ZBTB48  | LRFN4     |
| ZBTB9   | LRIG1     |
| ZC3H7B  | LRIG2     |
| ZCCHC11 | LRP10     |
| ZCCHC7  | LRP3      |
| ZCRB1   | LRP4      |
| ZDHHC11 | LRP5      |
| ZDHHC19 | LRP8      |
| ZFAND2B | LRPAP1    |
| ZFAT    | LRRC20    |
| ZFHX2   | LRRC32    |
| ZFP106  | LRRC33    |
| ZFP2    | LRRC37B   |
| ZFP37   | LRRC40    |
| ZFP82   | LRRC49    |
| ZFP90   | LRRC58    |
| ZFPM2   | LRRC69    |
| ZFX     | LRRC8A    |
| ZHX3    | LRRFIP2   |
| ZIM2    | LRRN1     |
| ZMYM1   | LRWD1     |
| ZMYM2   | LSM12     |
| ZMYM4   | LSM4      |
| ZMYND15 | LSM8      |
| ZNF10   | LSS       |
| ZNF114  | LTBP3     |
| ZNF124  | LTBR      |
| ZNF135  | LY6E      |
| ZNF14   | LYAR      |

|         |           |
|---------|-----------|
| ZNF154  | LYPD1     |
| ZNF177  | LYPD6     |
| ZNF185  | LYPD6B    |
| ZNF193  | LYPLA1    |
| ZNF205  | LYRM4     |
| ZNF211  | LYSMD2    |
| ZNF213  | LYSMD3    |
| ZNF219  | LZTS1     |
| ZNF254  | M6PR      |
| ZNF26   | MAD2L1    |
| ZNF263  | MAD2L2    |
| ZNF277  | MAFF      |
| ZNF28   | MAGEC2    |
| ZNF285A | Magmas    |
| ZNF286C | MAGOHB    |
| ZNF322A | MAL2      |
| ZNF326  | MALT1     |
| ZNF333  | MAMDC2    |
| ZNF334  | MAN1A1    |
| ZNF34   | MAN1A2    |
| ZNF347  | MAN2B2    |
| ZNF397  | MANBA     |
| ZNF415  | MANBAL    |
| ZNF419  | MAOA      |
| ZNF420  | MAP1B     |
| ZNF425  | MAP1LC3A  |
| ZNF426  | MAP1LC3B2 |
| ZNF429  | MAP2K3    |
| ZNF43   | MAP2K4    |
| ZNF431  | MAP2K6    |
| ZNF433  | MAP3K11   |
| ZNF434  | MAP3K4    |
| ZNF454  | MAP3K7    |
| ZNF462  | MAP4K1    |
| ZNF484  | MAP4K2    |
| ZNF501  | MAP4K3    |
| ZNF516  | MAP6D1    |
| ZNF518A | MAPK1     |
| ZNF532  | MAPK12    |
| ZNF533  | MAPK13    |
| ZNF541  | MAPK9     |
| ZNF561  | MAPKAP1   |
| ZNF570  | MAPKAPK5  |
| ZNF571  | MAPRE3    |
| ZNF573  | MARCH11   |
| ZNF581  | MARCH2    |
| ZNF584  | MARCH3    |
| ZNF598  | MARCH4    |
| ZNF605  | MARCH6    |
| ZNF607  | MARK1     |



|         |          |
|---------|----------|
| ZNF609  | MARS     |
| ZNF611  | MARVELD3 |
| ZNF613  | MAST1    |
| ZNF616  | MAT2B    |
| ZNF621  | MATN3    |
| ZNF630  | MATR3    |
| ZNF658  | MBD1     |
| ZNF667  | MBD2     |
| ZNF671  | MBD3L5   |
| ZNF680  | MBD6     |
| ZNF700  | MBNL2    |
| ZNF701  | MBNL3    |
| ZNF708  | MBOAT1   |
| ZNF714  | MBOAT2   |
| ZNF720  | MBOAT7   |
| ZNF721  | MC1R     |
| ZNF766  | MCART1   |
| ZNF773  | MCCC1    |
| ZNF775  | MCEE     |
| ZNF783  | MCF2     |
| ZNF805  | MCL1     |
| ZNF81   | MCM2     |
| ZNF821  | MCM3     |
| ZNF839  | MCRS1    |
| ZRANB2  | MCTP1    |
| ZRANB3  | MDGA2    |
| ZRSR2   | MDK      |
| ZSCAN16 | MDN1     |
| ZSCAN18 | ME2      |
| ZSWIM4  | MED22    |
|         | MED23    |
|         | MED27    |
|         | MED30    |
|         | MED31    |
|         | MEF2D    |
|         | MEGF10   |
|         | MEGF6    |
|         | MEGF9    |
|         | MEIS3    |
|         | MELK     |
|         | MEP1A    |
|         | MEST     |
|         | MET      |
|         | METRNL   |
|         | METTLL1  |
|         | METTLL3  |
|         | METTLL5  |
|         | METTLL6  |
|         | MFAP2    |
|         | MFAP4    |

MFAP5  
MFNG  
MFSD1  
MFSD5  
MGAT1  
MGAT2  
MGAT3  
MGAT4C  
MGC11082  
MGC15763  
MGC24103  
MGC26356  
MGC33556  
MGC39900  
MGC40168  
MGC40489  
MGC57346  
MGC61598  
MGC71993  
MGC72104  
MGC87042  
MGLL  
MGST2  
MGST3  
MIAT  
MICAL1  
MICB  
MID1  
MIF4GD  
MIIP  
MIR1978  
MIR221  
MIR302C  
MIR302D  
MIRLET7D  
MITD1  
MKI67  
MKI67IP  
MKLN1  
MKNK1  
MKX  
MLC1  
MLF1  
MLKL  
MLL4  
MLPH  
MLXIPL  
MMAB  
MMACHC  
MMADHC

MMD  
MME  
MMP10  
MMP2  
MMP23B  
MMP24  
MMP25  
MMP9  
MMS19  
MNAT1  
MND1  
MNS1  
MOBK3  
MOCOS  
MON1B  
MORC4  
MORF4L1  
MOSC2  
MOSPD2  
MOV10  
MOXD1  
MPDU1  
MPP1  
MPP2  
MPP6  
MPRIP  
MPZ  
MPZL1  
MPZL2  
MRE11A  
MRGPRF  
MRI1  
MRLC2  
MRPL10  
MRPL11  
MRPL12  
MRPL15  
MRPL3  
MRPL33  
MRPL35  
MRPL39  
MRPL42  
MRPL45  
MRPL47  
MRPL53  
MRPL9  
MRPS21  
MRPS23  
MRPS35  
MRPS5

MRPS7  
MRRF  
MRS2  
MRTO4  
MSH2  
MSI2  
MSL3  
MSL3L1  
MST1  
MST4  
MSX2  
MT1A  
MT1E  
MT1F  
MT1G  
MT1H  
MT1M  
MT1X  
MTA2  
MTA3  
MTF2  
MTHFD1  
MTHFD1L  
MTHFD2  
MTHFR  
MTIF2  
MTL5  
MTMR10  
MTMR11  
MTMR2  
MTMR3  
MTMR4  
MTMR7  
MTMR9  
MTO1  
MTR  
MTSS1L  
MTTP  
MTUS1  
MTX2  
MTX3  
MUC1  
MUC16  
MUC4  
MUTYH  
MVD  
MVK  
MVP  
MX1  
MXD1

MXD3  
MXD4  
MYC  
MYCN  
MYD88  
MYH11  
MYH9  
MYL4  
MYL5  
MYL6  
MYL7  
MYL9  
MYLC2PL  
MYLK  
MYO10  
MYO18A  
MYO19  
MYO1B  
MYO1C  
MYO1D  
MYO5A  
MYO5C  
MYO6  
MYO7A  
MYOF  
MYOZ3  
MYRIP  
MYST3  
MYT1  
MZF1  
N4BP2L1  
N4BP3  
N6AMT1  
N6AMT2  
NAB2  
NACC2  
NAE1  
NAGPA  
NAMPT  
NANOG  
NAP1L1  
NAP1L2  
NAP1L3  
NAP1L6  
NARS  
NARS2  
NAT8B  
NAT9  
NAV1  
NAV2

NBL1  
NBPF20  
NBPF8  
NBR2  
NCALD  
NCAPG  
NCBP2  
NCCRP1  
NCK2  
NCKAP1  
NCOA4  
NCOA5  
NCOA6  
NCOA7  
NCRNA00153  
NCRNA00219  
NDC80  
NDN  
NDRG1  
NDRG2  
NDRG3  
NDST1  
NDST2  
NDUFA1  
NDUFA2  
NDUFA3  
NDUFAF3  
NDUFB11  
NDUFB3  
NDUFB6  
NDUFB7  
NDUFV2  
NECAB1  
NEDD1  
NEDD4  
NEDD9  
NEFL  
NEFM  
NEK3  
NEK6  
NELF  
NELL2  
NENF  
NEO1  
NES  
NETO2  
NFASC  
NFATC1  
NFATC3  
NFE2

NFE2L3  
NFIL3  
NFKB2  
NFKBIB  
NFU1  
NFX1  
NGEF  
NGRN  
NHLH2  
NHP2  
NHP2L1  
NID2  
NIF3L1  
NINJ1  
NINL  
NIPAL1  
NIPSNAP3A  
NKAIN4  
NKIRAS1  
NKX6-2  
NLE1  
NLGN1  
NLGN4X  
NLN  
NLRP12  
NLRP7  
NME1  
NME1-NME2  
NME2  
NME3  
NME6  
NME7  
NMNAT2  
NMU  
NNT  
NOC2L  
NOC3L  
NOC4L  
NOL11  
NOL3  
NOMO1  
NOP2  
NOP56  
NOP58  
NOTCH1  
NOTCH3  
NOVA1  
NOX4  
NP  
N-PAC

NPAL3  
NPAS1  
NPFFR2  
NPIP  
NPL  
NPM3  
NPPB  
NPTX2  
NPW  
NQO1  
NR2F2  
NR5A2  
NRBF2  
NRG1  
NRIP3  
NRN1L  
NRP1  
NRP2  
NRSN2  
NSD1  
NSDHL  
NSMCE4A  
NSUN5  
NSUN5B  
NSUN5C  
NT5C  
NT5DC1  
NT5E  
NTM  
NTN3  
NTRK3  
NTS  
NUAK1  
NUCB2  
NUDCD1  
NUDCD2  
NUDT1  
NUDT10  
NUDT11  
NUDT14  
NUDT15  
NUDT21  
NUDT3  
NUDT6  
NUDT9  
NUFIP1  
NUP35  
NUP37  
NUP54  
NUP62



NUP98  
NUPR1  
NUSAP1  
NXF1  
NYNRIN  
OAF  
OAS2  
OAS3  
OAT  
OBFC2A  
OCIAD1  
OCIAD2  
OCRL  
ODC1  
ODF2  
ODZ3  
ODZ4  
OGDH  
OGFR  
OGFRL1  
OIP5  
OLFM1  
ONECUT2  
OPN3  
OPTN  
OR2A1  
OR2A42  
OR2A9P  
OR7E156P  
ORAI3  
ORC2L  
ORC5L  
ORC6L  
ORMDL3  
OSBPL10  
OSBPL1A  
OSBPL2  
OSBPL6  
OSCP1  
OSGEPL1  
OSGIN2  
OSR1  
OSTalpha  
OSTM1  
OTUB1  
OTUB2  
OTUD6B  
OTX2  
OVGP1  
OVOS2

OXCT1  
OXCT2  
OXR1  
P15RS  
P2RX2  
P2RX4  
P4HA1  
P4HA2  
P8  
PAAF1  
PABPC4L  
PACSIN1  
PACSIN2  
PAFAH1B3  
PAG1  
PAGE4  
PAGE5  
PAICS  
PAIP2  
PAK1  
PAK1IP1  
PAK2  
PAK6  
PANX2  
PAOX  
PAQR3  
PAQR4  
PAQR9  
PARL  
PARP1  
PARP4  
PARP6  
PARP8  
PARP9  
PARVA  
PASK  
PATE2  
PATE3  
PAWR  
PBRM1  
PBX1  
PBX3  
PCBD1  
PCBP2  
PCDH1  
PCDH11X  
PCDH11Y  
PCDH19  
PCDHA1  
PCDHB15

PCDHB17  
PCDHB2  
PCDHB5  
PCGF2  
PCGF6  
PCID2  
PCNA  
PCNX  
PCNX  
PCNXL2  
PCNXL3  
PCOLCE  
PCOLCE2  
PCSK5  
PCSK9  
PCYT2  
PDCD10  
PDCD2  
PDCD2L  
PDCL3  
PDE12  
PDE4A  
PDE4B  
PDE4C  
PDE6B  
PDE6D  
PDE7A  
PDGFA  
PDGFRA  
PDIA3P  
PDIA5  
PDIA6  
PDIK1L  
PDK3  
PDK4  
PDLIM3  
PDPK1  
PDPN  
PDSS1  
PDXK  
PDXP  
PDZD2  
PDZD4  
PDZK1  
PDZK1P1  
PEAR1  
PECR  
PEG10  
PELI1  
PEMT  
PERP

PEX11A  
PEX11B  
PEX7  
PFDN4  
PFDN5  
PFKFB2  
PFKL  
PFKM  
PFKP  
PGAM4  
PGAM5  
PGF  
PGS1  
PHAX  
PHB2  
PHC1  
PHC2  
PHF16  
PHF17  
PHF2  
PHF21B  
PHF5A  
PHGDH  
PHKA2  
PHKB  
PHLDA1  
PHLDA2  
PHLDA3  
PHLDB2  
PHOSPHO2  
PHRF1  
PHYH  
PI15  
PI4KB  
PIAS2  
PIAS3  
PIB5PA  
PICALM  
PID1  
PIF1  
PIGF  
PIGK  
PIGZ  
PIK3CB  
PIK3IP1  
PIK3R1  
PIK4CA  
PIM1  
PIM2  
PINK1

PINX1  
PIP4K2A  
PIP5K2A  
PITPNC1  
PITX1  
PITX2  
PJA2  
PKD2  
PKDCC  
PKIA  
PKIG  
PKM2  
PKP2  
PKP4  
PLA2G12B  
PLA2G15  
PLA2G3  
PLAC1  
PLAT  
PLAU  
PLAUR  
PLCB2  
PLCL2  
PLD1  
PLD2  
PLD6  
PLEKHA2  
PLEKHA6  
PLEKHB1  
PLEKHF1  
PLEKHG4  
PLEKHG6  
PLEKHH1  
PLOD2  
PLP1  
PLRG1  
PLS3  
PLXNB1  
PMAIP1  
PMEPA1  
PMS2CL  
PMVK  
PNCK  
PNKD  
PNMA1  
PNMA2  
PNMA3  
PNN  
PNPLA2  
PNPLA6

PNPLA7  
PNPLA8  
PNPO  
PODXL  
PODXL2  
POFUT1  
POFUT2  
POGZ  
POLA1  
POLE2  
POLR1D  
POLR1E  
POLR2D  
POLR2F  
POLR3D  
POLR3F  
POLR3G  
POLR3GL  
POMC  
PON2  
PON3  
POPDC3  
POT1  
POU5F1  
POU5F1P1  
PPAN  
PPAP2A  
PPAP2B  
PPAP2C  
PPAPDC3  
PPARA  
PPARG  
PPAT  
PPFIBP1  
PPFIBP2  
PPHLN1  
PPIC  
PPIL1  
PPIL3  
PPL  
PPM1B  
PPM1E  
PPM1G  
PPM1H  
PPM2C  
PPOX  
PPP1CC  
PPP1R13B  
PPP1R14B  
PPP1R14C

PPP1R16B  
PPP1R1A  
PPP1R1B  
PPP1R3B  
PPP1R3C  
PPP2CB  
PPP2R1A  
PPP2R2B  
PPP2R2C  
PPP2R3B  
PPP2R3C  
PPP2R4  
PPP2R5B  
PPP2R5C  
PPP2R5D  
PPP4R4  
PPPDE1  
PPT1  
PQLC1  
PRAC  
PRAGMIN  
PRAMEF15  
PRAMEF4  
PRAMEF5  
PRAMEF9  
PRDM1  
PRDM14  
PRDX1  
PRDX2  
PREI3  
PREP  
PRICKLE1  
PRICKLE2  
PRICKLE4  
PRIM1  
PRIM2A  
PRKAA1  
PRKAG2  
PRKAR1B  
PRKCD  
PRKCZ  
PRKD2  
PRKDC  
PRKRA  
PRMT1  
PRMT2  
PRMT3  
PRMT5  
PRNPIP  
PROCR

PRODH  
PROK2  
PROS1  
PRPSAP2  
PRR11  
PRR14  
PRR16  
PRR3  
PRR5  
PRRT3  
PRRX2  
PRSS12  
PRSS23  
PRTFDC1  
PSAT1  
PSCD1  
PSD4  
PSEN1  
PSG3  
PSIP1  
psiTPTE22  
PSMC3IP  
PSMC5  
PSMD10  
PSMD12  
PSMD14  
PSMD7  
PSME1  
PSMF1  
PSPH  
PSTK  
PSTPIP2  
PTAR1  
PTBP2  
PTCD2  
PTGES  
PTGES2  
PTGES3  
PTGFRN  
PTGIS  
PTGR1  
PTGS2  
PTH1R  
PTH2R  
PTK2  
PTK2B  
PTK7  
PTMA  
PTP4A2  
PTP4A3



PTPLA  
PTPLB  
PTPN12  
PTPN13  
PTPN2  
PTPN6  
PTPRA  
PTPRE  
PTPRF  
PTPRG  
PTPRK  
PTPRM  
PTPRZ1  
PTRF  
PTRH2  
PUM1  
PUS1  
PVRL1  
PVRL2  
PVT1  
PWP1  
PWWP2  
PWWP2B  
PXDN  
PXMP2  
PYCARD  
PYCR1  
PYCR2  
PYDC1  
QKI  
QPCT  
QTRTD1  
RAB11FIP1  
RAB17  
RAB20  
RAB22A  
RAB23  
RAB25  
RAB27A  
RAB28  
RAB31  
RAB32  
RAB38  
RAB39B  
RAB3B  
RAB3C  
RAB3IP  
RAB40B  
RAB43  
RAB5A

RAB5B  
RAB5C  
RAB9A  
RABGGTB  
RAC1  
RAC2  
RAC3  
RAD50  
RAD51  
RAD51AP1  
RAD51C  
RAD51L1  
RAD54B  
RAI1  
RALBP1  
RALGDS  
RAMP2  
RAN  
RANBP1  
RANBP10  
RANBP3  
RAP1GAP  
RAP1GDS1  
RARA  
RARRES1  
RARRES2  
RASD2  
RASGRF2  
RASGRP2  
RASIP1  
RASL10A  
RASL10B  
RASL11B  
RASL12  
RASSF1  
RASSF9  
RAX  
RBBP8  
RBCK1  
RBKS  
RBL2  
RBM11  
RBM12B  
RBM18  
RBM3  
RBM34  
RBM35A  
RBM47  
RBM9  
RBMS1

RBP1  
RBP4  
RBPJ  
RBPMS  
RBPMS2  
RBX1  
RCAN2  
RCC2  
RCL1  
RCN2  
RCOR2  
RCOR3  
RDH10  
RDH12  
RDH13  
RDH16  
RDM1  
RDX  
RECK  
RECQL5  
REEP1  
REEP2  
REEP6  
REG1A  
REP15  
REPS2  
RERE  
RETSAT  
RFC2  
RFC3  
RFC4  
RFESD  
RFTN1  
RFWD3  
RFX3  
RFXAP  
RGL1  
RGMA  
RGMB  
RGS10  
RGS12  
RGS17  
RGS2  
RGS4  
RGS7  
RGS7BP  
RHBDF2  
RHBDL3  
RHEBL1  
RHOT1

RICH2  
RIF1  
RIMKLB  
RIMS2  
RIMS3  
RIMS4  
RIN2  
RING1  
RINL  
RIPK1  
RIPK2  
RIT2  
RLN2  
RNASE4  
RNASEH2A  
RNASEK  
RNASEN  
RND2  
RND3  
RNF103  
RNF125  
RNF128  
RNF135  
RNF144A  
RNF144B  
RNF145  
RNF146  
RNF149  
RNF150  
RNF170  
RNF175  
RNF217  
RNF220  
RNF34  
RNF38  
RNF39  
RNF40  
RNF41  
RNF44  
RNF5P1  
RNF7  
RNFT2  
RNH1  
RNU105A  
RNU86  
ROBO3  
ROMO1  
ROR2  
RORB  
RP5-1022P6.2

RP9P  
RPAIN  
RPAP1  
RPAP3  
RPE  
RPESP  
RPF2  
RPL10A  
RPL12  
RPL12P6  
RPL13  
RPL13A  
RPL13L  
RPL17  
RPL22  
RPL32  
RPL36AL  
RPL39L  
RPL41  
RPL6  
RPL7  
RPL7L1  
RPL8  
RPL9  
RPLP0  
RPP25  
RPP38  
RPP40  
RPRD1A  
RPRM  
RPRML  
RPS15  
RPS24  
RPS26  
RPS26L  
RPS26P10  
RPS26P11  
RPS6KA2  
RPS6KA5  
RPS6KB2  
RPS6P1  
RPS7  
RPSA  
RRAS2  
RRBP1  
RRM2B  
RSL1D1  
RSL24D1  
RSPO3  
RTCD1

RTN3  
RTN4IP1  
RTN4R  
RTP1  
RUNX1  
RUNX1T1  
RUVBL1  
RWDD1  
RXRA  
RYK  
RYR1  
RYR2  
S100A11  
S100A16  
S100A4  
S100A6  
S100P  
S100PBP  
SAAL1  
SACS  
SAE1  
SAFB2  
SALL2  
SALL3  
SALL4  
SAMD13  
SAP30  
SAPS1  
SAPS2  
SARS  
SARS2  
SBK1  
SC4MOL  
SC5DL  
SCAMP1  
SCARA3  
SCARB1  
SCARB2  
SCARNA10  
SCARNA9  
SCD  
SCG2  
SCG3  
SCG5  
SCGB3A2  
SCML1  
SCML2  
SCN4A  
SCNN1A  
SCNN1G

SCO1  
SCP2  
SCPEP1  
SCYL1  
SDC4  
SDCCAG10  
SDF4  
SDHA  
SDHALP1  
SDHAP2  
SDHAP3  
SEC11C  
SEC14L1  
SEC22C  
SEC61B  
SEC63  
SECISBP2  
SECISBP2L  
SEL1L3  
SELK  
SELO  
SELS  
SELV  
SEMA3A  
SEMA4A  
SEMA6B  
SEMG1  
SENP8  
SEPHS1  
SEPHS2  
SEPN1  
SEPP1  
SEPSECS  
SEPT10  
SEPT3  
SEPT5  
SEPW1  
SERF1A  
SERF1B  
SERF2  
SERINC1  
SERPINA1  
SERPINA3  
SERPINA5  
SERPINC1  
SERPINE1  
SERPINF2  
SERPING1  
SERPINH1  
SERPINI1

SERTAD2  
SERTAD3  
SERTAD4  
SET  
SETD3  
SF3A3  
SF3B14  
SFN  
SFRP2  
SFRS17A  
SFT2D1  
SFTA1P  
SFXN4  
SGCG  
SGK3  
SGOL1  
SH2D3C  
SH2D5  
SH3BGRL  
SH3BGRL3  
SH3BP4  
SH3GL2  
SH3GL3  
SH3GLB2  
SH3PXD2A  
SH3PXD2B  
SH3RF1  
SH3RF2  
SH3TC1  
SHANK2  
SHANK3  
SHBG  
SHC1  
SHC2  
SHD  
SHISA2  
SHISA3  
SHMT2  
SHQ1  
SIDT2  
SIGIRR  
SIGMAR1  
SIK3  
SIL1  
SILV  
SIN3B  
SIP1  
SIPA1  
SIPA1L2  
SIRT1



SIRT2  
SIRT5  
SKAP2  
SKP2  
SLC10A1  
SLC10A3  
SLC12A2  
SLC13A5  
SLC16A14  
SLC16A4  
SLC16A5  
SLC19A3  
SLC1A1  
SLC1A3  
SLC1A5  
SLC20A1  
SLC22A17  
SLC22A5  
SLC22A7  
SLC23A1  
SLC23A2  
SLC23A3  
SLC25A15  
SLC25A16  
SLC25A19  
SLC25A20  
SLC25A21  
SLC25A24  
SLC25A25  
SLC25A26  
SLC25A29  
SLC25A37  
SLC25A39  
SLC25A40  
SLC25A6  
SLC26A11  
SLC26A6  
SLC27A5  
SLC27A6  
SLC2A14  
SLC2A6  
SLC30A3  
SLC31A2  
SLC35A2  
SLC35A4  
SLC35A5  
SLC35B3  
SLC35E1  
SLC35F1  
SLC35F2

SLC37A3  
SLC38A1  
SLC38A10  
SLC39A1  
SLC39A11  
SLC39A14  
SLC39A4  
SLC39A5  
SLC39A6  
SLC3A2  
SLC40A1  
SLC43A2  
SLC43A3  
SLC44A1  
SLC45A3  
SLC45A4  
SLC46A3  
SLC47A1  
SLC4A11  
SLC4A2  
SLC4A7  
SLC4A8  
SLC5A6  
SLC5A9  
SLC6A10P  
SLC6A15  
SLC6A16  
SLC6A9  
SLC7A1  
SLC7A10  
SLC7A11  
SLC7A14  
SLC7A2  
SLC7A3  
SLC7A5  
SLC7A6  
SLC7A7  
SLC7A9  
SLC8A2  
SLC9A3R1  
SLC9A5  
SLC9A8  
SLCO1A2  
SLCO1B1  
SLCO2B1  
SLCO3A1  
SLFN11  
SLK  
SLMO1  
SMA5

SMAD6  
SMAD7  
SMAGP  
SMAP1  
SMAP2  
SMARCA1  
SMARCA2  
SMARCC1  
SMC2  
SMC4  
SMCR5  
SMG1  
SMN1  
SMN2  
SMOC2  
SMOX  
SMPD1  
SMPDL3A  
SMPDL3B  
SMTN  
SMYD4  
SNAI2  
SNAP23  
SNAP29  
SNAP91  
SNAPIN  
SNCA  
SNHG1  
SNHG12  
SNHG4  
SNHG5  
SNHG7  
SNHG8  
SNORA10  
SNORA11D  
SNORA18  
SNORA33  
SNORA45  
SNORA73A  
SNORA73B  
SNORA79  
SNORA84  
SNORD11  
SNORD16  
SNORD21  
SNORD22  
SNORD25  
SNORD30  
SNORD31  
SNORD36A

SNORD36C  
SNORD48  
SNORD76  
SNORD80  
SNORD96A  
SNRK  
SNRNP35  
SNRPA  
SNRPB  
SNRPC  
SNRPD3  
SNRPN  
SNTB1  
SNURF  
SNX1  
SNX10  
SNX11  
SNX25  
SNX30  
SNX4  
SNX5  
SOAT2  
SOCS2  
SOCS3  
SOCS4  
SOD1  
SOHLH2  
SOLH  
SORCS1  
SORD  
SORL1  
SORT1  
SOX10  
SOX11  
SOX18  
SOX2  
SOX21  
SOX3  
SOX7  
SOX8  
SOX9  
SP8  
SPARC  
SPATA18  
SPATA6  
SPATA7  
SPATS2L  
SPC24  
SPEN  
SPG3A

SPHK1  
SPIN3  
SPINK1  
SPINK2  
SPINT1  
SPIRE2  
SPNS2  
SPOCD1  
SPOCK1  
SPOCK2  
SPON1  
SPP1  
SPR  
SPRED1  
SPRY4  
SPRYD3  
SPRYD4  
SPRYD5  
SPSB1  
SPSB2  
SPTLC1  
SPTLC3  
SPTY2D1  
SQLE  
SREBF1  
SRP14  
SRP9  
SSB  
SSPO  
SSR4  
SSU72  
ST13  
ST3GAL1  
ST3GAL5  
ST3GAL6  
ST5  
ST6GAL1  
ST6GALNAC3  
ST6GALNAC5  
ST6GALNAC6  
ST7L  
ST8SIA5  
STAG3L1  
STAMBP  
STAMBPL1  
STARD10  
STARD13  
STARD3NL  
STARD8  
STAT1

STAT2  
STC1  
STEAP1  
STEAP2  
STEAP3  
STIM1  
STK11  
STK24  
STK25  
STK32A  
STK33  
STK39  
STK40  
STMN1  
STOM  
STOML2  
STOX2  
STRAP  
STRBP  
STRN4  
STX3  
STX4  
STXBP3  
STXBP6  
SUCLA2  
SUCLG2  
SULF2  
SULT1A1  
SULT1A2  
SULT1A3  
SULT1A4  
SULT2A1  
SULT2B1  
SUMF1  
SUMO1P3  
SUMO2  
SUOX  
SUPT3H  
SURF4  
SUSD2  
SUV420H1  
SV2A  
SVEP1  
SVIL  
SVOPL  
SYN2  
SYN3  
SYNGR1  
SYNGR3  
SYNJ1

SYPL1  
SYT1  
SYT11  
SYT13  
SYT15  
SYT4  
SYT6  
SYTL1  
SYTL2  
SYVN1  
T  
TAC1  
TAC3  
TACC1  
TAF1  
TAF1A  
TAF1D  
TAF2  
TAF4B  
TAF7  
TAF9L  
TAGLN  
TAGLN3  
TANC2  
TAOK1  
TAOK2  
TAP2  
TAPBP  
TAPT1  
TARBP2  
TARS  
TATDN1  
TATDN3  
TBC1D16  
TBC1D17  
TBC1D20  
TBC1D23  
TBC1D2B  
TBC1D3B  
TBC1D8  
TBC1D9  
TBCE  
TBL1XR1  
TBP  
TBX1  
TBX3  
TC2N  
TCEA1  
TCEA3  
TCEAL2

TCEAL3  
TCEAL4  
TCEAL7  
TCEAL8  
TCEB2  
TCERG1  
TCF2  
TCF7L1  
TCIRG1  
TCL1A  
TCN2  
TCP10L  
TCTEX1D2  
TDG  
TDGF1  
TDGF3  
TDO2  
TDP1  
TDRD7  
TEAD2  
TEAD4  
TEKT3  
TERF1  
TERF2IP  
TESC  
TESK1  
TET1  
TEX10  
TEX2  
TEX264  
TF  
TFAM  
TFAP2A  
TFB1M  
TFCP2  
TFG  
TFIP11  
TFPI  
TFPI2  
TGFB3  
TGFB1  
TGFB2  
TGFB3  
TGIF1  
TGM2  
TGOLN2  
THAP1  
THBS2  
THBS4  
THNSL1



THOC3  
THUMPD2  
THY1  
THYN1  
TIA1  
TIAF1  
TIAL1  
TIAM2  
TIGA1  
TIMELESS  
TIMM44  
TIMM9  
TIMP2  
TIMP3  
TIMP4  
TIPIN  
TKT  
TLE3  
TLE4  
TLE6  
TLN1  
TM2D1  
TM2D2  
TM4SF1  
TM4SF5  
TM6SF1  
TMBIM6  
TMEFF1  
TMEFF2  
TMEM106C  
TMEM108  
TMEM109  
TMEM115  
TMEM116  
TMEM118  
TMEM120A  
TMEM125  
TMEM126B  
TMEM128  
TMEM132A  
TMEM132B  
TMEM132D  
TMEM140  
TMEM141  
TMEM143  
TMEM144  
TMEM145  
TMEM14D  
TMEM150A  
TMEM155

TMEM159  
TMEM165  
TMEM166  
TMEM167A  
TMEM16A  
TMEM16B  
TMEM16D  
TMEM17  
TMEM170B  
TMEM175  
TMEM176A  
TMEM179B  
TMEM183A  
TMEM183B  
TMEM184B  
TMEM185B  
TMEM189-UB  
TMEM195  
TMEM200A  
TMEM206  
TMEM209  
TMEM214  
TMEM217  
TMEM218  
TMEM22  
TMEM27  
TMEM31  
TMEM38B  
TMEM42  
TMEM44  
TMEM48  
TMEM50B  
TMEM55A  
TMEM56  
TMEM59L  
TMEM62  
TMEM63B  
TMEM64  
TMEM69  
TMEM86B  
TMPRSS11E2  
TMPRSS2  
TMPRSS6  
TMSB15A  
TMSB4Y  
TMTC1  
TMTC3  
TMX1  
TNFRSF10A  
TNFRSF1B

TNFRSF21  
TNFRSF8  
TNFSF10  
TNFSF12  
TNFSF13B  
TNIK  
TNIP1  
TNMD  
TNNC2  
TNNI3  
TNNT1  
TNRC6B  
TNS1  
TOLLIP  
TOM1  
TOM1L2  
TOMM20  
TOMM40  
TOMM6  
TOP1MT  
TOR2A  
TOX2  
TP53BP1  
TP53BP2  
TP53INP1  
TP53INP2  
TPD52L1  
TPI1  
TPM1  
TPM2  
TPP1  
TPR  
TPRG1L  
TRADD  
TRAF4  
TRAF5  
TRAIP  
TRAK1  
TRAK2  
TRAM1L1  
TRAPPC9  
TRDMT1  
TRERF1  
TRH  
TRIAP1  
TRIB3  
TRIM13  
TRIM21  
TRIM24  
TRIM33

TRIM37  
TRIM38  
TRIM4  
TRIM45  
TRIM46  
TRIM48  
TRIM49  
TRIM53  
TRIM55  
TRIM64  
TRIM65  
TRIML2  
TRIP13  
TRMT1  
TRMT11  
TRO  
TRPC1  
TRPC6  
TRPM6  
TRPV6  
TRRAP  
TSC1  
TSC2  
TSC22D3  
TSC22D4  
TSEN15  
TSEN34  
TSGA14  
TSHZ1  
TSHZ2  
TSHZ3  
TSPAN18  
TSPAN33  
TSPAN7  
TSPO  
TSPYL2  
TSSC1  
TST  
TSTD2  
TTC13  
TTC15  
TTC19  
TTC27  
TTC29  
TTC38  
TTC39B  
TTC39C  
TTK  
TLL3  
TLL6

TTPAL  
TTR  
TTYH1  
TUB  
TUBB  
TUBB2A  
TUBB2B  
TUBB2C  
TUBB3  
TUBB4  
TUBB4Q  
TUBB6  
TUBB8  
TUBE1  
TUBG1  
TUBGCP6  
TULP3  
TULP4  
TUSC3  
TWIST1  
TWISTNB  
TXNDC11  
TXNDC12  
TXNL2  
TYRO3  
TYSND1  
U2AF2  
UBA2  
UBA3  
UBA7  
UBE1C  
UBE2E2  
UBE2E3  
UBE2G1  
UBE2I  
UBE2J1  
UBE2L3  
UBE2V2  
UBIAD1  
UBL5  
UBLCP1  
UBR7  
UBXN4  
UCA1  
UCHL1  
UCHL5IP  
UCK2  
UCRC  
UFM1  
UFSP2

UGDH  
UGP2  
UGT2B11  
UGT2B28  
UGT2B7  
UGT3A2  
UGT8  
UHRF1  
ULBP1  
UNC119  
UNC5A  
UNC5D  
UNC84B  
UNC93A  
UNG  
UNQ9433  
UPF2  
UPF3A  
UPF3B  
UPP1  
UQCRQ  
USO1  
USP15  
USP24  
USP28  
USP3  
USP32  
USP33  
USP36  
USP38  
USP44  
USP47  
USP53  
USP9X  
UST  
UTF1  
UTP15  
UTP18  
UTS2  
UTX  
UVRAG  
UXT  
VAMP1  
VAMP2  
VAMP8  
VANGL1  
VANGL2  
VAPA  
VASH1  
VASH2

VASN  
VAT1  
VAT1L  
VAV3  
VCL  
VEGFB  
VENTX  
VGF  
VHL  
VIL1  
VIL2  
VIM  
VKORC1  
VLDLR  
VOPP1  
VPS13A  
VPS24  
VPS25  
VPS28  
VPS41  
VRK1  
VRK3  
VTCN1  
VTI1B  
VTN  
VWA5A  
WARS  
WDHD1  
WDR1  
WDR12  
WDR13  
WDR22  
WDR34  
WDR35  
WDR4  
WDR41  
WDR43  
WDR45  
WDR46  
WDR53  
WDR79  
WDR8  
WDR81  
WDR86  
WDSOF1  
WDSUB1  
WDYHV1  
WEE1  
WFDC2  
WFS1

WHAMM  
WIPF3  
WIP12  
WNK1  
WNK2  
WNT10B  
WNT3  
WRB  
WSB1  
WSCD1  
WTAP  
WWC3  
XAF1  
XK  
XKR6  
XPNPEP2  
XPO1  
XPO5  
XPO7  
XPOT  
XPR1  
XRCC3  
XRCC5  
XRN1  
XRN2  
XYLB  
YAF2  
YAP1  
YARS  
YARS2  
YBX2  
YEATS2  
YEATS4  
YIF1B  
YJEFN3  
YME1L1  
YPEL2  
YRDC  
YTHDC1  
YWHAB  
YWHAQ  
YWHAZ  
ZAK  
ZBED5  
ZBTB16  
ZBTB2  
ZBTB20  
ZBTB22  
ZBTB24  
ZBTB3



ZBTB33  
ZBTB47  
ZC3H14  
ZC3H8  
ZC3HAV1  
ZC3HC1  
ZC4H2  
ZCCHC24  
ZDHHC13  
ZDHHC14  
ZDHHC15  
ZDHHC22  
ZDHHC23  
ZFAND1  
ZFAND2A  
ZFHX3  
ZFP14  
ZFP36  
ZFP36L2  
ZFP42  
ZFP62  
ZFP91  
ZFR2  
ZFY  
ZFYVE27  
ZGPAT  
ZHX1  
ZIC2  
ZIC3  
ZIK1  
ZKSCAN2  
ZMAT3  
ZMAT4  
ZMYM5  
ZMYND12  
ZMYND8  
ZNF101  
ZNF134  
ZNF138  
ZNF146  
ZNF165  
ZNF167  
ZNF175  
ZNF18  
ZNF189  
ZNF195  
ZNF197  
ZNF20  
ZNF200  
ZNF204

ZNF215  
ZNF217  
ZNF226  
ZNF232  
ZNF239  
ZNF256  
ZNF268  
ZNF273  
ZNF274  
ZNF275  
ZNF280B  
ZNF280C  
ZNF280D  
ZNF281  
ZNF286A  
ZNF295  
ZNF296  
ZNF30  
ZNF300  
ZNF311  
ZNF324  
ZNF330  
ZNF331  
ZNF343  
ZNF35  
ZNF354A  
ZNF383  
ZNF384  
ZNF385D  
ZNF391  
ZNF394  
ZNF395  
ZNF398  
ZNF423  
ZNF428  
ZNF430  
ZNF442  
ZNF444  
ZNF451  
ZNF467  
ZNF483  
ZNF485  
ZNF493  
ZNF502  
ZNF503  
ZNF512B  
ZNF519  
ZNF524  
ZNF525  
ZNF544



ZSCAN10

ZSCAN12

ZSCAN2

ZSCAN21

ZSCAN4

ZSWIM1

ZWILCH

ZXDB

ZXDC

ZZEF1

| Primary antibodies      |                   |                          |             |          |
|-------------------------|-------------------|--------------------------|-------------|----------|
| Human antigene          | Species raised in | Company                  | Catalog Nr. | Dilution |
| OCT4                    | mouse             | Santa Cruz Biotechnology | sc-5279     | 1:200    |
| SOX17                   | goat              | R&D Systems              | AF1924      | 1:100    |
| alpha fetoprotein (AFP) | mouse             | Sigma-Aldrich            | WH0000174M1 | 1:300    |
| E-Cadherin (E-CAD)      | mouse             | Santa Cruz               | sc-21791    | 1:200    |
| Albumin (ALB)           | mouse             | Sigma-Aldrich            | A-6684      | 1:200    |
| HNF4a                   | mouse             | Santa Cruz               | sc-8987     | 1:200    |
| A1AT                    | mouse             | R&D Systems              | MAB1268     | 1:200    |
| BSEP                    | goat              | Santa Cruz               | sc-17292    | 1:200    |

| Secondary antibodies            |                   |            |             |          |
|---------------------------------|-------------------|------------|-------------|----------|
| Antigene                        | Species raised in | Company    | Catalog Nr. | Dilution |
| anti-goat IgG, Alexa fluor 488  | donkey            | Invitrogen | A11055      | 1:300    |
| anti-goat IgG, Alexa fluor 594  | chicken           | Invitrogen | A21468      | 1:300    |
| anti-mouse IgG, Alexa fluor 488 | goat              | Invitrogen | A11001      | 1:300    |
| anti-mouse IgG, Alexa fluor 594 | goat              | Invitrogen | A11005      | 1:300    |

Supplementary Table S11: Quantitative real-time PCR (QPCR) primer sequences.

| Gene          | Size (bp) | Primer  | Sequence 5'-3'             |
|---------------|-----------|---------|----------------------------|
| OCT4          | 119       | forward | GTGGAGGAAGCTGACAACAA       |
|               |           | reverse | ATTCTCCAGGTTGCCTCTCA       |
| GAPDH         | 81        | forward | CTGGTAAAGTGGATATTGTTGCCAT  |
|               |           | reverse | TGGAATCATATTGGAACATGTAAACC |
| SOX2          | 78        | forward | GTATCAGGAGTTGTCAAGGCAGAG   |
|               |           | reverse | TCCTAGTCTTAAAGAGGCAGCAAAC  |
| NANOG         | 78        | forward | CCTGTGATTTGTGGGCCTG        |
|               |           | reverse | GACAGTCTCCGTGTGAGGCAT      |
| LEFTY1        | 76        | forward | AATGTGTCATTGTTTACTTGTCTGTC |
|               |           | reverse | CAGGTCTTAGGTCCAGAGTGGTG    |
| GDF3          | 96        | forward | TTGGCACAAGTGGATCATTGC      |
|               |           | reverse | TTGGCACAAGTGGATCATTGC      |
| FGF4          | 109       | forward | CCCTTCTCACCAGATGAGTGC      |
|               |           | reverse | CATTCTTGCTCAGGGCGATG       |
| DPPA4         | 91        | forward | TGGTGTGAGGTGGTGTGTGG       |
|               |           | reverse | CCAGGCTTGACCAGCATGAA       |
| DNMT3B        | 93        | forward | GCTCACAGGGCCCGATACTT       |
|               |           | reverse | GCAGTCTGCAGCTCGAGTTTA      |
| SOX17         | 86        | forward | ACGTGTACTACGGCGCGATG       |
|               |           | reverse | CTGGTGCTGGTGCTGGTGTT       |
| FOXA2         | 97        | forward | TTCAGGCCCGGCTAACTCTG       |
|               |           | reverse | CCTTGCGTCTCTGCAACACC       |
| HNF4 $\alpha$ | 102       | forward | GTGCGGAAGAACCACATGTACTC    |
|               |           | reverse | GAAGCATTCTTGAGCCTGCAGTA    |
| AFP           | 88        | forward | AGCAGCTTGGTGGTGGATGA       |
|               |           | reverse | CCTGAGCTTGGCACAGATCCT      |
| ALB           | 77        | forward | GCGCAGATGACAGGGCGGAA       |
|               |           | reverse | GTGCCGTAGCATGCGGGAGG       |
| A1AT          | 76        | forward | GGTCACAGAGGAGGCACCC        |
|               |           | reverse | AGTCCCTTCTCGTCGATGGT       |
| TBX3          | 88        | forward | AGTCCCTCCAGTGAACAAGCAG     |
|               |           | reverse | TCTTTGAGGTTTCGATGTCCC      |
| FAH           | 79        | forward | CGGGCCGGAGCCAGAAAAC        |
|               |           | reverse | ACCATTCCCCAGGTCTATG        |
| TDO2          | 77        | forward | GGTGAAGACGGCTGTCATACAG     |
|               |           | reverse | TGGAACCTAGGCTCTTCCCTG      |
| PROM1/CD133   | 69        | forward | GACTTGCGAACTCTCTTGAATGA    |
|               |           | reverse | GGTAGTGTGTACTGGGCCAAT      |
| LGR5          | 118       | forward | TTTGGACAAGGGAGACCTGGAGAA   |
|               |           | reverse | AGAGGAGAAGGACAAGAAAGCCACA  |
| CYP1A1        | 195       | forward | AAACAGGGCCACATAGATGC       |
|               |           | reverse | AGGGTCTGGTTTGGCTAGT        |
| CYP3A4        | 79        | forward | GTGACTTTGCCATTGTTTAGAAAG   |
|               |           | reverse | CAGGCGTGAGCCACTGTG         |
| CYP3A7        | 77        | forward | GATTCTGTACGTGCATTGTGCTC    |

|         |     |         |                              |
|---------|-----|---------|------------------------------|
|         |     | reverse | ATTGGTCATCTCCTCTATATTACCAAGT |
| CYP11A1 | 83  | forward | CTGCATCTTCAGTCGTCTGTCC       |
|         |     | reverse | GGTGACCACTGAGAACCCATTC       |
| CYP19A1 | 100 | forward | TGGCTGTGCAGGAAAGTACATC       |
|         |     | reverse | AACACACTGTCCTTGCAATGTCTTC    |
